# Supplementary material for: The Proteome of Extracellular Vesicles Released from Pulmonary Microvascular Endothelium Reveals Impact of Oxygen Conditions on Biotrauma
Source: MDPI journal article supplement (doi:10.3390/ijms25042415), 2024-02-19
Supplement: s1 [file s1]

**HMVEC-L Donors list:**

| NR. | ETHNIC    | GENDER | AGE  |
|-----|-----------|--------|------|
| 1   | caucasian | female | n.d. |
| 2   | caucasian | male   | 50y  |
| 3   | hispanic  | male   | 75y  |
| 4   | caucasian | female | 33y  |
| 5   | hispanic  | male   | 50y  |
| 6   | caucasian | male   | 48y  |
| 7   | hispanic  | male   | 44y  |
| 8   | caucasian | female | 66y  |
| 9   | caucasian | male   | 65y  |
