# Supplementary material for: The Proteome of Extracellular Vesicles Released from Pulmonary Microvascular Endothelium Reveals Impact of Oxygen Conditions on Biotrauma
Source: Int J Mol Sci. 2024 Feb 19;25(4):2415. doi: 10.3390/ijms25042415 (PMC10889365; doi:10.3390/ijms25042415)
Supplement: Supplementary file 1 [file ijms-25-02415-s001.zip]

Archive with 5 entries (5 files):
- Supplemental Data S1.xlsx
- Supplemental Data S2b.xlsx
- Supplemental Data S3.xlsx
- Supplemental Data S4.pdf
- Supplemetal Data S2a.jpg
