# Supplementary material for: The Proteome of Extracellular Vesicles Released from Pulmonary Microvascular Endothelium Reveals Impact of Oxygen Conditions on Biotrauma
Source: Int J Mol Sci. 2024 Feb 19;25(4):2415. doi: 10.3390/ijms25042415 (PMC10889365; doi:10.3390/ijms25042415)
Supplement: Supplementary file 1 [file ijms-25-02415-s001.zip › Supplemental Data S1.xlsx]

## Sheet: Sheet1
Accession	Uniprot protein acession number
Description	Protein name
Exp. q-value: Combined
Sum PEP Score	The posterior error probability (PEP)
Coverage [%]	The percentage of the protein sequences covered by identified peptides
# Peptides	The total number of distinct peptide sequences identified
# PSMs	The number of identified peptide spectrum matches.
# Unique Peptides	The total number of distinct peptide sequences unique to the protein group
# AAs	Protein lenghth in amino acids
MW [kDa]	Molecular weight of the protein
calc. pI	Isoelectric point
Score Sequest HT: Sequest HT
# Peptides (by Search Engine): Sequest HT
Biological Process
Cellular Component
Molecular Function
Pfam IDs
Entrez Gene ID
Ensembl Gene ID
Gene Symbol
Gene ID
Reactome Pathways
WikiPathways
# Protein Pathway Groups
# Razor Peptides	Number of shared peptides used for quantification
Abundance Ratio: (Hyperoxic 0-95) / (Hyperoxic 21)
Abundance Ratio: (Hyperoxic 95) / (Hyperoxic 21)
Abundance Ratio: (Hyperoxic 21) / (Hypoxic 21)
Abundance Ratio: (Hypoxic 0-21) / (Hypoxic 21)
Abundance Ratio: (Hypoxic 10) / (Hypoxic 21)
Abundance Ratio: (Hypoxic 2) / (Hypoxic 21)
Abundance Ratio Adj. P-Value: (Hyperoxic 0-95) / (Hyperoxic 21)
Abundance Ratio Adj. P-Value: (Hyperoxic 95) / (Hyperoxic 21)
Abundance Ratio Adj. P-Value: (Hyperoxic 21) / (Hypoxic 21)
Abundance Ratio Adj. P-Value: (Hypoxic 0-21) / (Hypoxic 21)
Abundance Ratio Adj. P-Value: (Hypoxic 10) / (Hypoxic 21)
Abundance Ratio Adj. P-Value: (Hypoxic 2) / (Hypoxic 21)
Abundance Ratio Variability [%]: (Hyperoxic 0-95) / (Hyperoxic 21)
Abundance Ratio Variability [%]: (Hyperoxic 95) / (Hyperoxic 21)
Abundance Ratio Variability [%]: (Hyperoxic 21) / (Hypoxic 21)
Abundance Ratio Variability [%]: (Hypoxic 0-21) / (Hypoxic 21)
Abundance Ratio Variability [%]: (Hypoxic 10) / (Hypoxic 21)
Abundance Ratio Variability [%]: (Hypoxic 2) / (Hypoxic 21)
Abundances (Grouped): Hyperoxic 0-95
Abundances (Grouped): Hyperoxic 21
Abundances (Grouped): Hyperoxic 40
Abundances (Grouped): Hyperoxic 95
Abundances (Grouped): Hypoxic 0-21
Abundances (Grouped): Hypoxic 10
Abundances (Grouped): Hypoxic 2
Abundances (Grouped): Hypoxic 21
Abundances (Grouped): SM
Abundances (Grouped) CV [%]: Hyperoxic 0-95
Abundances (Grouped) CV [%]: Hyperoxic 21
Abundances (Grouped) CV [%]: Hyperoxic 40
Abundances (Grouped) CV [%]: Hyperoxic 95
Abundances (Grouped) CV [%]: Hypoxic 0-21
Abundances (Grouped) CV [%]: Hypoxic 10
Abundances (Grouped) CV [%]: Hypoxic 2
Abundances (Grouped) CV [%]: Hypoxic 21
Abundances (Grouped) CV [%]: SM
Found in Sample: F5: 130N, Sample, Hyperoxic 0-95, D1
Found in Sample: F7: 127N, Sample, Hyperoxic 0-95, D3
Found in Sample: F8: 126, Sample, Hyperoxic 0-95, D2
Found in Sample: F5: 128C, Sample, Hyperoxic 21, D1
Found in Sample: F7: 129C, Sample, Hyperoxic 21, D3
Found in Sample: F8: 129N, Sample, Hyperoxic 21, D2
Found in Sample: F5: 129N, Sample, Hyperoxic 40, D1
Found in Sample: F7: 130N, Sample, Hyperoxic 40, D3
Found in Sample: F8: 129C, Sample, Hyperoxic 40, D2
Found in Sample: F5: 129C, Sample, Hyperoxic 95, D1
Found in Sample: F7: 126, Sample, Hyperoxic 95, D3
Found in Sample: F8: 130N, Sample, Hyperoxic 95, D2
Found in Sample: F5: 128N, Sample, Hypoxic 0-21, D1
Found in Sample: F7: 129N, Sample, Hypoxic 0-21, D3
Found in Sample: F8: 128C, Sample, Hypoxic 0-21, D2
Found in Sample: F5: 127C, Sample, Hypoxic 10, D1
Found in Sample: F7: 128C, Sample, Hypoxic 10, D3
Found in Sample: F8: 128N, Sample, Hypoxic 10, D2
Found in Sample: F5: 127N, Sample, Hypoxic 2, D1
Found in Sample: F7: 128N, Sample, Hypoxic 2, D3
Found in Sample: F8: 127C, Sample, Hypoxic 2, D2
Found in Sample: F5: 126, Sample, Hypoxic 21, D1
Found in Sample: F7: 127C, Sample, Hypoxic 21, D3
Found in Sample: F8: 127N, Sample, Hypoxic 21, D2
Found in Sample: F5: 131, Sample, SM, D1
Found in Sample: F7: 131, Sample, SM, D3
Found in Sample: F8: 131, Sample, SM, D2
# Protein Groups
Modifications

## Sheet: 0-95% vs 21%
Accession	Description	Exp. q-value: Combined	Sum PEP Score	Coverage [%]	# Peptides	# PSMs	# Unique Peptides	# AAs	MW [kDa]	calc. pI	Score Sequest HT: Sequest HT	# Peptides (by Search Engine): Sequest HT	Biological Process	Cellular Component	Molecular Function	Pfam IDs	Entrez Gene ID	Ensembl Gene ID	Gene Symbol	Gene ID
O14976	Cyclin-G-associated kinase [OS=Homo sapiens]	0.003	2.983	1	1	1	1	1311	143.1	5.73	2.07	1	cell cycle OR cell proliferation;cell organization and biogenesis;protein metabolism;other metabolic processes;transport;other biological processes	cytosol;ER/Golgi;other cell component	kinase activity;other molecular function	Pf00069, Pf10409	2580	ENSG00000178950	GAK	hsa:2580; O14976; Q5U4P5; Q9BVY6
P15531	Nucleoside diphosphate kinase A [OS=Homo sapiens]	0	34.106	51	8	38	3	152	17.1	6.19	141.67	8	DNA metabolism;other metabolic processes;transport;developmental processes;other biological processes	plasma membrane;other membranes;cytosol;nucleus;other cell component	translation activity;kinase activity;other molecular function	Pf00334	4830	ENSG00000239672	NME1	hsa:4830; P15531; Q6FGK3; Q86XQ2; Q9UDJ6
P01031	Complement C5 [OS=Homo sapiens]	0.002	3.415	1	1	2	1	1676	188.2	6.52	5.85	1	stress response;developmental processes;signal transduction;other biological processes	non-structural extracellular;plasma membrane;other membranes	signal transduction activity or receptor binding;enzyme regulator activity	Pf00207, Pf01759, Pf01821, Pf01835, Pf07677, Pf07678, Pf07703, Pf17789, Pf17790, Pf17791	727	ENSG00000106804	C5	hsa:727; P01031; Q14CJ0; Q27I61
P34059	N-acetylgalactosamine-6-sulfatase [OS=Homo sapiens]	0.001	6.83	5	3	3	2	522	58	6.74	8.18	3		non-structural extracellular;other cytoplasmic organelle	other molecular function	Pf00884, Pf14707	2588	ENSG00000141012	GALNS	hsa:2588; P34059; Q86VK3
P17302	Gap junction alpha-1 protein [OS=Homo sapiens]	0.001	6.607	8	2	2	2	382	43	8.76	6.59	2	cell-cell signaling;cell cycle OR cell proliferation;cell organization and biogenesis;transport;developmental processes;signal transduction;other biological processes	plasma membrane;other membranes;mitochondrion;ER/Golgi;nucleus;other cell component	transporter activity;cytoskeletal activity;other molecular function	Pf00029, Pf03508	2697	ENSG00000152661	GJA1	B2R5U9; hsa:2697; P17302; Q6FHU1; Q9Y5I8
Q9UJW0	Dynactin subunit 4 [OS=Homo sapiens]	0	20.451	18	3	8	3	460	52.3	7.34	31.97	3		cytosol;cytoskeleton;nucleus;other cell component		Pf05502	51164	ENSG00000132912	DCTN4	B3KWW0; D3DQH0; E5RGT5; hsa:51164; Q8TAN8; Q9UJW0
Q13451	Peptidyl-prolyl cis-trans isomerase FKBP5 [OS=Homo sapiens]	0	11.907	15	4	5	4	457	51.2	5.9	10.25	4	protein metabolism;other metabolic processes;other biological processes	cytosol;nucleus;other cell component	other molecular function	Pf00254, Pf00515	2289	ENSG00000096060	FKBP5	F5H7R1; hsa:2289; Q13451; Q59EB8; Q5TGM6
P48723	Heat shock 70 kDa protein 13 [OS=Homo sapiens]	0.007	2.373	1	1	2	1	471	51.9	5.76	4.33	1	stress response;other biological processes	mitochondrion;ER/Golgi;other cell component	other molecular function	Pf00012	6782	ENSG00000155304	HSPA13	B2R616; hsa:6782; P48723; Q8NE40
P36404	ADP-ribosylation factor-like protein 2 [OS=Homo sapiens]	0.002	3.058	5	1	1	1	184	20.9	6.34	2.32	1	cell cycle OR cell proliferation;cell organization and biogenesis;other biological processes	plasma membrane;other membranes;cytosol;cytoskeleton;mitochondrion;ER/Golgi;nucleus;other cell component	other molecular function	Pf00025	402	ENSG00000213465	ARL2	G3V184; hsa:402; P36404; Q9BUK8
Q9UN86	Ras GTPase-activating protein-binding protein 2 [OS=Homo sapiens]	0.001	6.569	7	2	3	2	482	54.1	5.55	8.28	2	cell organization and biogenesis;stress response;transport;signal transduction;other biological processes	cytosol;other cell component	nucleic acid binding activity;other molecular function	Pf00076, Pf02136	9908	ENSG00000138757	G3BP2	A8K6X1; hsa:9908; O60606; O75149; Q9UN86; Q9UPA1
P50895	Basal cell adhesion molecule [OS=Homo sapiens]	0.001	6.985	4	2	2	2	628	67.4	5.81	5.96	2	cell adhesion;signal transduction	plasma membrane;other membranes	other molecular function	Pf07686, Pf08205, Pf13895, Pf13927	4059	ENSG00000187244	BCAM	A8MYF9; A9YWT5; A9YWT6; hsa:4059; P50895; Q86VC7
P18085	ADP-ribosylation factor 4 [OS=Homo sapiens]	0.002	3.705	6	1	1	1	180	20.5	7.14	2.94	1	cell organization and biogenesis;transport;developmental processes;other biological processes	plasma membrane;other membranes;cytosol;ER/Golgi;other cell component	signal transduction activity or receptor binding;enzyme regulator activity;other molecular function	Pf00025	378	ENSG00000168374	ARF4	B2R7J7; hsa:378; P18085; P21371
Q969G3	SWI/SNF-related matrix-associated actin-dependent regulator of chromatin subfamily E member 1 [OS=Homo sapiens]	0.001	5.745	6	2	4	2	411	46.6	4.88	9.36	2	cell organization and biogenesis;RNA metabolism OR transcription;developmental processes;other biological processes	nucleus;other cell component	nucleic acid binding activity;other molecular function	Pf00505	6605	ENSG00000073584	SMARCE1	B3KMC1; B4DFR4; C0IMW4; C0IMW5; C0IMW7; H7C3F6; hsa:6605; O43539; Q969G3
Q9UI12	V-type proton ATPase subunit H [OS=Homo sapiens]	0.001	6.429	6	2	3	2	483	55.8	6.48	9.95	2	cell organization and biogenesis;transport;other biological processes	plasma membrane;other membranes;cytosol;other cytoplasmic organelle;other cell component	transporter activity;enzyme regulator activity	Pf03224, Pf11698	51606	ENSG00000047249	ATP6V1H	B3KMR0; hsa:51606; Q6PK44; Q9H3E3; Q9UI12; Q9Y300
P19174	1-phosphatidylinositol 4,5-bisphosphate phosphodiesterase gamma-1 [OS=Homo sapiens]	0.001	4.694	2	2	3	2	1290	148.4	6.05	2.72	2	other metabolic processes;developmental processes;signal transduction;other biological processes	plasma membrane;other membranes;cytosol;nucleus;other cell component	signal transduction activity or receptor binding;other molecular function	Pf00017, Pf00018, Pf00168, Pf00387, Pf00388	5335	ENSG00000124181	PLCG1	B7ZLY7; B9EGH4; E1P5W4; hsa:5335; P19174; Q2V575
O43324	Eukaryotic translation elongation factor 1 epsilon-1 [OS=Homo sapiens]	0.002	4.323	10	2	2	2	174	19.8	8.54	6.33	2	protein metabolism;other metabolic processes;other biological processes	cytosol;nucleus;other cell component		Pf00043	9521	ENSG00000124802	EEF1E1	C9JLK5; hsa:9521; O43324; Q5THS2
Q8N668	COMM domain-containing protein 1 [OS=Homo sapiens]	0.002	4.109	8	1	1	1	190	21.2	6.2	3.23	1	DNA metabolism;other metabolic processes;stress response;transport;other biological processes	other membranes;cytosol;nucleus;other cytoplasmic organelle;other cell component	other molecular function	Pf07258, Pf17221	150684	ENSG00000173163	COMMD1	B4DFQ4; hsa:150684; Q8N668; Q96GS0
P51571	Translocon-associated protein subunit delta [OS=Homo sapiens]	0.002	4.085	6	1	2	1	173	19	6.15	7.32	1		other membranes;ER/Golgi;other cell component		Pf05404	6748	ENSG00000180879	SSR4	A8K378; hsa:6748; P51571; Q53XY1
P49321	Nuclear autoantigenic sperm protein [OS=Homo sapiens]	0	20.017	10	7	11	7	788	85.2	4.3	36.46	7	cell cycle OR cell proliferation;cell organization and biogenesis;DNA metabolism;other metabolic processes;transport;developmental processes;other biological processes	nucleus;other cell component	other molecular function	Pf10516	4678	ENSG00000132780	NASP	A8K6H2; B4DQP3; D3DQ07; F5H3J2; hsa:4678; P49321; Q53GW5; Q5T622; Q5T625; Q96A69; Q9BTW2
P05543	Thyroxine-binding globulin [OS=Homo sapiens]	0	8.082	9	4	4	4	415	46.3	6.3	6.68	4	transport;other biological processes	non-structural extracellular	enzyme regulator activity	Pf00079	6906	ENSG00000123561	SERPINA7	D3DUX1; hsa:6906; P05543
Q10570	Cleavage and polyadenylation specificity factor subunit 1 [OS=Homo sapiens]	0.002	3.743	1	1	1	1	1443	160.8	6.4	3.17	1	RNA metabolism OR transcription;other metabolic processes	nucleus	nucleic acid binding activity;other molecular function	Pf03178, Pf10433	29894	ENSG00000071894; ENSG00000285049	CPSF1	hsa:29894; Q10570; Q96AF0
Q92888	Rho guanine nucleotide exchange factor 1 [OS=Homo sapiens]	0.002	3.798	3	2	2	2	912	102.4	5.66	2.53	2	signal transduction;other biological processes	plasma membrane;other membranes;cytosol;other cell component	signal transduction activity or receptor binding;enzyme regulator activity	Pf00621, Pf09128, Pf17838	9138	ENSG00000076928	ARHGEF1	hsa:9138; O00513; Q6NX52; Q8N4J4; Q92888; Q96BF4; Q96F17; Q9BSB1
Q9H6N6	Putative uncharacterized protein MYH16 [OS=Homo sapiens]	0.004	2.773	1	1	2	1	1097	128.2	5.49	5.81	1		cytoskeleton		Pf01576			MYH16	Q9H6N6
P10301	Ras-related protein R-Ras [OS=Homo sapiens]	0	14.575	32	5	8	4	218	23.5	6.93	23.42	5	developmental processes;signal transduction;other biological processes	plasma membrane;other membranes	other molecular function	Pf00071	6237	ENSG00000126458	RRAS	hsa:6237; P10301; Q6FH12
Q6NY19	KN motif and ankyrin repeat domain-containing protein 3 [OS=Homo sapiens]	0	14.276	7	4	4	4	821	85.8	5.02	11.36	4	cell organization and biogenesis	cytoskeleton;other cell component		Pf12075, Pf12796, Pf13857	256949	ENSG00000186994	KANK3	hsa:256949; Q6NY19; Q6NZI1; Q6ZQR3; Q8IUV2
Q02763	Angiopoietin-1 receptor [OS=Homo sapiens]	0.001	5.29	2	1	1	1	1124	125.7	6.89	6.43	1	cell adhesion;cell-cell signaling;cell cycle OR cell proliferation;protein metabolism;other metabolic processes;developmental processes;signal transduction;other biological processes	non-structural extracellular;plasma membrane;other membranes;cytoskeleton;other cell component	kinase activity;other molecular function	Pf00041, Pf07714, Pf10430	7010	ENSG00000120156	TEK	A8K6W0; B4DH20; B4DHD3; D3DRK5; E7EWI2; hsa:7010; Q02763; Q5TCU2; Q8IV34
P13611	Versican core protein [OS=Homo sapiens]	0.001	5.39	1	1	2	1	3396	372.6	4.51	9.56	1	cell adhesion;developmental processes;other biological processes	non-structural extracellular;extracellular matrix;ER/Golgi;other cytoplasmic organelle;other cell component	extracellular structural activity;other molecular function	Pf00008, Pf00059, Pf00084, Pf00193, Pf07686	1462	ENSG00000038427	VCAN	hsa:1462; P13611; P20754; Q13010; Q13189; Q15123; Q9UCL9; Q9UNW5
P21796	Voltage-dependent anion-selective channel protein 1 [OS=Homo sapiens]	0	8.873	10	3	4	3	283	30.8	8.54	11.51	3	cell-cell signaling;other metabolic processes;stress response;transport;other biological processes	plasma membrane;other membranes;mitochondrion;other cell component	transporter activity;other molecular function	Pf01459	7416	ENSG00000213585	VDAC1	B3KVK4; D3DQ93; hsa:7416; P21796; Q5FVE7; Q9UIQ5; Q9UPL0
P09874	Poly [ADP-ribose] polymerase 1 [OS=Homo sapiens]	0.001	4.499	2	2	2	2	1014	113	8.88	4.36	2	cell organization and biogenesis;protein metabolism;DNA metabolism;RNA metabolism OR transcription;other metabolic processes;stress response;signal transduction;other biological processes	cytosol;mitochondrion;nucleus;other cell component	nucleic acid binding activity;other molecular function	Pf00533, Pf00644, Pf00645, Pf02877, Pf05406, Pf08063	142	ENSG00000143799	PARP1	B1ANJ4; hsa:142; P09874; Q8IUZ9
P13598	Intercellular adhesion molecule 2 [OS=Homo sapiens]	0	13.996	17	5	18	5	275	30.6	7.43	50.27	5	cell adhesion	plasma membrane;other membranes;other cell component	signal transduction activity or receptor binding	Pf03921	3384	ENSG00000108622	ICAM2	hsa:3384; P13598; Q14600
P17174	Aspartate aminotransferase, cytoplasmic [OS=Homo sapiens]	0.001	5.885	5	2	4	2	413	46.2	7.01	12.05	2	other metabolic processes;signal transduction;other biological processes	cytosol;nucleus;other cell component	other molecular function	Pf00155	2805	ENSG00000120053	GOT1	B2R6R7; B7Z7E9; hsa:2805; P17174; Q5VW80
P20810	Calpastatin [OS=Homo sapiens]	0	12.812	9	3	4	3	708	76.5	5.07	15.45	3	cell organization and biogenesis;other biological processes	other membranes;cytosol;ER/Golgi;other cell component	enzyme regulator activity	Pf00748	831	ENSG00000153113	CAST	B7Z468; G5E946; G5E9D3; hsa:831; O95360; P20810; Q05DE8; Q7Z4K0; Q96D08; Q9H1Z5
Q9NZ08	Endoplasmic reticulum aminopeptidase 1 [OS=Homo sapiens]	0.001	5.832	2	2	2	2	941	107.2	6.46	5.51	2	protein metabolism;other metabolic processes;developmental processes;signal transduction;other biological processes	non-structural extracellular;plasma membrane;other membranes;cytosol;ER/Golgi;other cell component	signal transduction activity or receptor binding;other molecular function	Pf01433, Pf11838, Pf17900	51752	ENSG00000164307	ERAP1	hsa:51752; O60278; Q6UWY6; Q8NEL4; Q8TAD0; Q9NZ08; Q9UHF8; Q9UKY2
Q8NBS9	Thioredoxin domain-containing protein 5 [OS=Homo sapiens]	0	27.234	20	7	13	7	432	47.6	5.97	40.83	7	other biological processes	non-structural extracellular;ER/Golgi;other cytoplasmic organelle	other molecular function	Pf00085	81567	ENSG00000239264	TXNDC5	B2RDM2; hsa:81567; Q5TCQ0; Q8NBS9; Q8ND33; Q8TCT2; Q9BVH9
O94973	AP-2 complex subunit alpha-2 [OS=Homo sapiens]	0	11.232	4	4	10	1	939	103.9	6.96	19.37	4	transport	plasma membrane;other membranes;cytosol;other cytoplasmic organelle;other cell component	other molecular function	Pf01602, Pf02296, Pf02883	161	ENSG00000183020	AP2A2	hsa:161; O75403; O94973; Q53ET1; Q96SI8
O60216	Double-strand-break repair protein rad21 homolog [OS=Homo sapiens]	0.004	2.661	2	1	1	1	631	71.6	4.65	2.76	1	cell cycle OR cell proliferation;cell organization and biogenesis;DNA metabolism;other metabolic processes;stress response;other biological processes	cytosol;cytoskeleton;nucleus;other cell component	nucleic acid binding activity;other molecular function	Pf04824, Pf04825	5885	ENSG00000164754	RAD21	A8K0E0; hsa:5885; O60216; Q15001; Q99568
P13716	Delta-aminolevulinic acid dehydratase [OS=Homo sapiens]	0	14.247	15	3	8	3	330	36.3	6.79	45	3	cell organization and biogenesis;other metabolic processes;stress response;other biological processes	non-structural extracellular;cytosol;other cell component	other molecular function	Pf00490	210	ENSG00000148218	ALAD	A8K375; B2R6F2; hsa:210; P13716; Q16870; Q16871; Q9BVQ9
Q9BTE6	Alanyl-tRNA editing protein Aarsd1 [OS=Homo sapiens]	0.002	3.278	4	1	1	1	412	45.5	6.42	2.55	1	protein metabolism;RNA metabolism OR transcription;other metabolic processes;other biological processes	other cell component	nucleic acid binding activity;other molecular function	Pf07973	100885850; 80755	ENSG00000108825; ENSG00000266967	AARSD1	B4DI73; hsa:100885850; hsa:80755; Q9BTE6
O95498	Pantetheine hydrolase VNN2 [OS=Homo sapiens]	0.001	5.459	4	2	3	1	520	58.5	6.52	9.88	2	other metabolic processes	non-structural extracellular;plasma membrane;other membranes	other molecular function	Pf00795, Pf19018	8875	ENSG00000112303	VNN2	A0AUZ3; A6NDY1; A8K4E3; A8K7W0; B2DFZ0; B2DFZ1; B2DFZ2; B2DFZ3; F6XL73; hsa:8875; O95498; Q2XUN1; Q9UJF3; Q9UMW2
P13073	Cytochrome c oxidase subunit 4 isoform 1, mitochondrial [OS=Homo sapiens]	0.002	3.267	7	1	1	1	169	19.6	9.51	3.6	1	other metabolic processes;transport	other membranes;cytosol;mitochondrion;nucleus	transporter activity	Pf02936	1327	ENSG00000131143	COX4I1	B2R4J2; D3DUM7; hsa:1327; P13073; Q6P666
P0DOY2	Immunoglobulin lambda constant 2 [OS=Homo sapiens]	0	12.297	48	4	6	3	106	11.3	7.24	13.9	4	cell organization and biogenesis;stress response;transport;signal transduction;other biological processes	non-structural extracellular;plasma membrane;other membranes	signal transduction activity or receptor binding;other molecular function	Pf07654		ENSG00000211677	IGLC2	A0A075B6K9; A0M8Q4; P0CG05; P0CG06; P0DOY2; P80423
P15151	Poliovirus receptor [OS=Homo sapiens]	0	20.649	11	3	14	3	417	45.3	6.52	63.4	3	cell adhesion;other biological processes	non-structural extracellular;plasma membrane;other membranes;other cell component	other molecular function	Pf07686, Pf08205	5817	ENSG00000073008	PVR	B4DTS9; hsa:5817; P15151; P15152; Q15267; Q15268; Q96BJ1
O00151	PDZ and LIM domain protein 1 [OS=Homo sapiens]	0	7.759	9	2	2	2	329	36	7.02	7.25	2	cell organization and biogenesis;RNA metabolism OR transcription;stress response;developmental processes;other biological processes	cytoskeleton;other cell component	cytoskeletal activity;other molecular function	Pf00412, Pf00595, Pf15936	9124	ENSG00000107438	PDLIM1	B2RBS6; hsa:9124; O00151; Q5VZH5; Q9BPZ9
Q08043	Alpha-actinin-3 [OS=Homo sapiens]	0	41.408	9	10	22	2	901	103.2	5.52	73.46	10	cell adhesion;cell organization and biogenesis;developmental processes;other biological processes	plasma membrane;other membranes;cytosol;cytoskeleton;other cell component	signal transduction activity or receptor binding;cytoskeletal activity;other molecular function	Pf00307, Pf00435, Pf08726	89	ENSG00000248746	ACTN3	A6NP77; hsa:89; Q08043; Q4KKV2
P06576	ATP synthase subunit beta, mitochondrial [OS=Homo sapiens]	0	49.428	32	10	25	10	529	56.5	5.4	91.65	10	other metabolic processes;transport;developmental processes;other biological processes	plasma membrane;other membranes;mitochondrion;other cell component	signal transduction activity or receptor binding;transporter activity;other molecular function	Pf00006, Pf02874	506	ENSG00000110955	ATP5F1B	A8K4X0; hsa:506; P06576; Q14283
Q8N128	Protein FAM177A1 [OS=Homo sapiens]	0.007	2.465	5	1	1	1	213	23.7	4.45	2.2	1				Pf14774	283635	ENSG00000151327	FAM177A1	hsa:283635; Q68CT2; Q8N128
Q9UKK9	ADP-sugar pyrophosphatase [OS=Homo sapiens]	0.001	6.163	10	2	5	2	219	24.3	4.94	17.14	2	cell organization and biogenesis;other metabolic processes	cytosol;nucleus	nucleic acid binding activity;other molecular function	Pf00293	11164	ENSG00000165609	NUDT5	A8K516; hsa:11164; Q6IAG0; Q9UH49; Q9UKK9
Q9C0C9	(E3-independent) E2 ubiquitin-conjugating enzyme [OS=Homo sapiens]	0.001	5.4	2	2	2	2	1292	141.2	5.12	6.93	2	protein metabolism;other metabolic processes;transport;other biological processes	cytosol;nucleus;other cell component	enzyme regulator activity;other molecular function	Pf00179	63893	ENSG00000175931	UBE2O	A6NDU5; hsa:63893; Q69YP4; Q6PIZ2; Q86UA4; Q8N425; Q8TBN1; Q9BSW1; Q9C0C9; Q9H6E6; Q9H7E4; Q9H9B2
P13804	Electron transfer flavoprotein subunit alpha, mitochondrial [OS=Homo sapiens]	0.001	5.25	8	2	2	2	333	35.1	8.38	6.9	2	other metabolic processes	mitochondrion;other cell component	other molecular function	Pf00766, Pf01012	2108	ENSG00000140374	ETFA	B4DT43; hsa:2108; P13804; Q53XN3
P20930	Filaggrin [OS=Homo sapiens]	0	32.435	4	12	22	12	4061	434.9	9.25	48.02	12	protein metabolism;other metabolic processes;other biological processes	plasma membrane;cytosol;other cell component	bone, tooth or skin structural activity;other molecular function	Pf01023, Pf03516	2312	ENSG00000143631	FLG	hsa:2312; P20930; Q01720; Q5T583; Q9UC71
P35916	Vascular endothelial growth factor receptor 3 [OS=Homo sapiens]	0	14.955	4	4	4	4	1363	152.7	6.3	12.99	4	protein metabolism;other metabolic processes;developmental processes;signal transduction;other biological processes	non-structural extracellular;plasma membrane;other membranes;cytosol;nucleus;other cell component	kinase activity;other molecular function	Pf07679, Pf07714, Pf13927, Pf17988	2324	ENSG00000037280	FLT4	A8K6L4; B5A926; hsa:2324; P35916; Q16067; Q86W07; Q86W08
P11117	Lysosomal acid phosphatase [OS=Homo sapiens]	0.002	3.192	6	2	2	2	423	48.3	6.74	4.61	2	cell organization and biogenesis;other metabolic processes	other membranes;other cytoplasmic organelle	other molecular function	Pf00328	53	ENSG00000134575	ACP2	E9PCI1; hsa:53; P11117; Q561W5; Q9BTU7
Q9UJJ9	N-acetylglucosamine-1-phosphotransferase subunit gamma [OS=Homo sapiens]	0	7.782	12	2	3	2	305	34	6.95	10.6	2	protein metabolism;other metabolic processes;transport	other membranes;ER/Golgi;other cytoplasmic organelle	other molecular function	Pf13015	84572	ENSG00000090581	GNPTG	B2R556; hsa:84572; Q6XYD7; Q96L13; Q9UJJ9
Q562R1	Beta-actin-like protein 2 [OS=Homo sapiens]	0	88.963	30	12	223	3	376	42	5.59	703.07	12	cell organization and biogenesis;developmental processes;other biological processes	other membranes;cytoskeleton;other cell component	cytoskeletal activity;other molecular function	Pf00022	345651	ENSG00000169067	ACTBL2	B2RPJ1; hsa:345651; Q562R1; Q562R2; Q562S9; Q562X8
Q16864	V-type proton ATPase subunit F [OS=Homo sapiens]	0.002	4.248	10	1	2	1	119	13.4	5.52	6.53	1	cell organization and biogenesis;transport;other biological processes	other membranes;cytosol;ER/Golgi;other cytoplasmic organelle;other cell component	transporter activity	Pf01990	9296	ENSG00000128524	ATP6V1F	C9J2K4; hsa:9296; Q16864; Q6IBA8
P01034	Cystatin-C [OS=Homo sapiens]	0.002	3.146	8	1	2	1	146	15.8	8.75	6.35	1	cell organization and biogenesis;stress response;other biological processes	non-structural extracellular;plasma membrane;other membranes;ER/Golgi;other cell component	enzyme regulator activity;other molecular function	Pf00031	1471	ENSG00000101439	CST3	B2R5J9; D3DW42; hsa:1471; P01034; Q6FGW9
Q9H4A4	Aminopeptidase B [OS=Homo sapiens]	0.001	5.99	4	2	3	2	650	72.5	5.74	9.03	2	protein metabolism	non-structural extracellular;plasma membrane;other membranes	other molecular function	Pf01433, Pf09127, Pf17900	6051	ENSG00000176393	RNPEP	hsa:6051; Q9BVM9; Q9H1D4; Q9H4A4; Q9NPT7
P17405	Sphingomyelin phosphodiesterase [OS=Homo sapiens]	0.003	2.992	2	1	1	1	631	69.9	7.28	2.33	1	cell organization and biogenesis;other metabolic processes;stress response;developmental processes;signal transduction;other biological processes	non-structural extracellular;plasma membrane;other membranes;other cytoplasmic organelle;other cell component	other molecular function	Pf00149, Pf19272	6609	ENSG00000166311	SMPD1	A8K8M3; E9PKS3; hsa:6609; P17405; P17406; Q13811; Q16837; Q16841
Q96CN7	Isochorismatase domain-containing protein 1 [OS=Homo sapiens]	0.002	4.18	5	1	1	1	298	32.2	7.39	2.44	1		other cytoplasmic organelle;other cell component		Pf00857	51015	ENSG00000066583	ISOC1	hsa:51015; Q7Z770; Q96CN7
P48506	Glutamate--cysteine ligase catalytic subunit [OS=Homo sapiens]	0.002	4.125	3	1	1	1	637	72.7	6.09	4.12	1	cell organization and biogenesis;other metabolic processes;stress response;transport;other biological processes	cytosol;mitochondrion;other cell component	other molecular function	Pf03074	2729	ENSG00000001084	GCLC	hsa:2729; P48506; Q14399
P22570	NADPH:adrenodoxin oxidoreductase, mitochondrial [OS=Homo sapiens]	0.001	6.693	6	3	3	3	491	53.8	8.44	5.59	3	other metabolic processes	other membranes;mitochondrion	other molecular function	Pf07992	2232	ENSG00000161513	FDXR	B4DDI7; B4DHX5; B4DQQ4; B4DX24; B7Z7G2; E7EQC1; hsa:2232; P22570; Q13716; Q4PJI0; Q9BU12
Q92823	Neuronal cell adhesion molecule [OS=Homo sapiens]	0	100.349	23	25	58	25	1304	143.8	5.66	198	25	cell adhesion;cell organization and biogenesis;developmental processes;other biological processes	non-structural extracellular;plasma membrane;other membranes;other cell component	cytoskeletal activity;other molecular function	Pf00041, Pf07679, Pf13882, Pf13927	4897	ENSG00000091129	NRCAM	A4D0S3; E9PDA4; hsa:4897; O15051; O15179; Q14BM2; Q92823; Q9UHI3; Q9UHI4
Q96IJ6	Mannose-1-phosphate guanyltransferase alpha [OS=Homo sapiens]	0.001	5.148	5	2	5	2	420	46.3	7.21	10.28	2	other metabolic processes	other cell component	other molecular function	Pf00483	29926	ENSG00000144591	GMPPA	A6NJ74; A8K3Q6; B3KMT4; hsa:29926; Q53GI0; Q96IJ6; Q9NWC3; Q9Y5P5
Q9NP79	Vacuolar protein sorting-associated protein VTA1 homolog [OS=Homo sapiens]	0.001	5.002	7	1	1	1	307	33.9	6.29	5.24	1	cell organization and biogenesis;other metabolic processes;transport;other biological processes	other membranes;cytosol;nucleus;other cytoplasmic organelle;other cell component		Pf04652, Pf18097	51534	ENSG00000009844	VTA1	B4DW55; E1P594; E7ETQ7; hsa:51534; Q5TGM1; Q6IAE8; Q9H0R2; Q9H3K9; Q9NP79; Q9P0Q0
Q9NVE7	4'-phosphopantetheine phosphatase [OS=Homo sapiens]	0.002	3.291	2	1	1	1	773	85.9	6.28	2.75	1	other metabolic processes	cytosol;nucleus	other molecular function	Pf01937, Pf03630	55229	ENSG00000157881; ENSG00000273494	PANK4	B9DI84; hsa:55229; Q53EU3; Q5TA84; Q7RTX3; Q9H3X5; Q9NVE7
Q09028	Histone-binding protein RBBP4 [OS=Homo sapiens]	0	8.44	8	2	3	1	425	47.6	4.89	19.37	2	cell cycle OR cell proliferation;cell organization and biogenesis;protein metabolism;DNA metabolism;other metabolic processes;developmental processes;other biological processes	cytosol;nucleus;other cell component	nucleic acid binding activity;other molecular function	Pf00400, Pf12265	5928	ENSG00000162521	RBBP4	B2R6G9; B4DRH0; D3DPQ3; hsa:5928; P31149; Q09028; Q53H02; Q96BV9
P54803	Galactocerebrosidase [OS=Homo sapiens]	0.001	7.641	4	2	2	2	685	77	6.64	7.95	2	other metabolic processes;developmental processes	other cytoplasmic organelle	other molecular function	Pf02057, Pf17387	2581	ENSG00000054983	GALC	B4DKE8; B4DYN1; B4DZJ8; B7Z7Z2; hsa:2581; J3KN25; J3KPP8; P54803; Q8J030
P37268	Squalene synthase [OS=Homo sapiens]	0.003	2.981	2	1	1	1	417	48.1	6.54	2.4	1	other metabolic processes	other membranes;ER/Golgi	other molecular function	Pf00494	2222	ENSG00000079459; ENSG00000284967	FDFT1	B3KQ95; B4DJE5; B4DT56; B7Z1J3; hsa:2222; P37268; Q96GT0
P68032	Actin, alpha cardiac muscle 1 [OS=Homo sapiens]	0	219.344	53	25	480	5	377	42	5.39	1447.8	25	cell organization and biogenesis;developmental processes;other biological processes	cytosol;cytoskeleton;other cell component	cytoskeletal activity;other molecular function	Pf00022	70	ENSG00000159251	ACTC1	hsa:70; P04270; P68032
Q8TDI0	Chromodomain-helicase-DNA-binding protein 5 [OS=Homo sapiens]	0.003	2.949	1	1	1	1	1954	222.9	6.15	2.59	1	cell organization and biogenesis;protein metabolism;other metabolic processes;developmental processes;other biological processes	cytosol;nucleus;other cell component	nucleic acid binding activity;other molecular function	Pf00176, Pf00271, Pf00385, Pf00628, Pf06461, Pf06465, Pf08073, Pf08074	26038	ENSG00000116254	CHD5	hsa:26038; O75032; Q5TG89; Q7LGH2; Q8TDI0; Q9UFR9
Q8TDQ7	Glucosamine-6-phosphate isomerase 2 [OS=Homo sapiens]	0	22.814	25	5	11	3	276	31.1	6.95	35.03	5	other metabolic processes	cytosol;other cell component	other molecular function	Pf01182	132789	ENSG00000163281	GNPDA2	B4DJF3; hsa:132789; Q2VYF1; Q59EA7; Q8NCZ8; Q8TDQ7; Q96BJ4; Q96NC6
P05165	Propionyl-CoA carboxylase alpha chain, mitochondrial [OS=Homo sapiens]	0.002	3.462	2	1	2	1	728	80	7.52	4.19	1	other metabolic processes	cytosol;mitochondrion;other cell component	other molecular function	Pf00289, Pf00364, Pf02785, Pf02786, Pf18140	5095	ENSG00000175198	PCCA	B4DKY8; B4DPF9; C9JPQ8; hsa:5095; P05165; Q15979; Q8WXQ7
Q9UIQ6	Leucyl-cystinyl aminopeptidase [OS=Homo sapiens]	0.001	6.619	4	3	3	3	1025	117.3	5.73	7.06	3	cell-cell signaling;protein metabolism;other metabolic processes;signal transduction;other biological processes	non-structural extracellular;plasma membrane;other membranes;cytosol;other cytoplasmic organelle;other cell component	other molecular function	Pf01433, Pf11838, Pf17900	4012	ENSG00000113441	LNPEP	hsa:4012; O00769; Q15145; Q59H76; Q9TNQ2; Q9TNQ3; Q9UIQ6; Q9UIQ7
P50213	Isocitrate dehydrogenase [NAD] subunit alpha, mitochondrial [OS=Homo sapiens]	0.003	3.025	3	1	1	1	366	39.6	6.92	3.04	1	other metabolic processes	mitochondrion	other molecular function	Pf00180	3419	ENSG00000166411	IDH3A	D3DW83; hsa:3419; P50213; Q9H3X0
O60879	Protein diaphanous homolog 2 [OS=Homo sapiens]	0	7.884	3	2	2	2	1101	125.5	6.58	8.07	2	cell organization and biogenesis;other biological processes	cytosol;cytoskeleton;ER/Golgi;nucleus;other cytoplasmic organelle;other cell component	signal transduction activity or receptor binding;cytoskeletal activity;other molecular function	Pf02181, Pf06367, Pf06371	1730	ENSG00000147202	DIAPH2	A6NG19; hsa:1730; O60878; O60879; Q8WX06; Q8WX48; Q9UJL2
Accession	Description	Exp. q-value: Combined	Sum PEP Score	Coverage [%]	# Peptides	# PSMs	# Unique Peptides	# AAs	MW [kDa]	calc. pI	Score Sequest HT: Sequest HT	# Peptides (by Search Engine): Sequest HT	Biological Process	Cellular Component	Molecular Function	Pfam IDs	Entrez Gene ID	Ensembl Gene ID	Gene Symbol	Gene ID
P20933	N(4)-(beta-N-acetylglucosaminyl)-L-asparaginase [OS=Homo sapiens]	0	10.829	11	2	5	2	346	37.2	6.28	18.3	2	protein metabolism;other metabolic processes	non-structural extracellular;ER/Golgi;other cytoplasmic organelle;other cell component	other molecular function	Pf01112	175	ENSG00000038002	AGA	B2R7H2; D3DP47; hsa:175; P20933; Q4W5Q2; Q6FHN6; Q9UCK6; Q9UCK7; Q9UCK8
Q5VIR6	Vacuolar protein sorting-associated protein 53 homolog [OS=Homo sapiens]	0.003	2.98	1	1	3	1	832	94.3	6.7	8.47	1	transport	other membranes;cytosol;ER/Golgi;other cytoplasmic organelle;other cell component		Pf04100	55275	ENSG00000141252; ENSG00000283883	VPS53	A8K2S8; B3FH42; hsa:55275; Q5VIR6; Q8WYW3; Q9BRR2; Q9BY02; Q9NV25
Q9BY76	Angiopoietin-related protein 4 [OS=Homo sapiens]	0.002	3.623	6	2	3	2	406	45.2	8.85	5.12	2	other metabolic processes;stress response;developmental processes;other biological processes	non-structural extracellular;extracellular matrix	signal transduction activity or receptor binding;enzyme regulator activity;other molecular function	Pf00147	51129	ENSG00000167772	ANGPTL4	A8MY84; B4E089; D6W670; F5H0I2; hsa:51129; Q53HQ6; Q53HU1; Q6UXN0; Q9BY76; Q9HBV4; Q9NZU4; Q9Y5B3
O75976	Carboxypeptidase D [OS=Homo sapiens]	0	10.224	3	3	3	3	1380	152.8	6.05	9.25	3	protein metabolism;other metabolic processes	non-structural extracellular;plasma membrane;other membranes	other molecular function	Pf00246, Pf13620	1362	ENSG00000108582	CPD	B7Z7T9; B7ZAU4; F5GZH6; hsa:1362; O15377; O75976; Q86SH9; Q86XE6
Q5T5P2	Sickle tail protein homolog [OS=Homo sapiens]	0.007	2.439	0	1	1	1	1943	214	7.06	2.17	1	developmental processes	cytoskeleton;other cell component		Pf03915	56243	ENSG00000120549	KIAA1217	A5LHW9; A6NLF3; A6PVQ5; A6PVQ6; A6PVQ7; B9EGK4; hsa:56243; Q4KMG4; Q5T5P2; Q5T5P3; Q5T7H3; Q6MZZ6; Q6ZUI4; Q8WV45; Q9NSR2; Q9ULK3
Q7LG56	Ribonucleoside-diphosphate reductase subunit M2 B [OS=Homo sapiens]	0.002	3.723	3	1	1	1	351	40.7	4.97	3.22	1	cell organization and biogenesis;DNA metabolism;other metabolic processes;stress response;developmental processes;other biological processes	cytosol;mitochondrion;nucleus	other molecular function	Pf00268	50484	ENSG00000048392	RRM2B	B4E2N4; hsa:50484; Q17R22; Q75PQ6; Q75PQ7; Q75PY8; Q75PY9; Q7LG56; Q86YE3; Q9NPD6; Q9NTD8; Q9NUW3
Q13630	GDP-L-fucose synthase [OS=Homo sapiens]	0	8.094	12	3	3	3	321	35.9	6.6	8.93	3	cell adhesion;other metabolic processes;other biological processes	cytosol	other molecular function	Pf01370	7264	ENSG00000104522; ENSG00000278243	GFUS	B2R8Y7; D3DWK5; hsa:7264; Q13630; Q567Q9; Q9UDG7
Q9NTK5	Obg-like ATPase 1 [OS=Homo sapiens]	0	10.194	10	3	7	3	396	44.7	7.81	19.47	3	other metabolic processes	non-structural extracellular;cytosol;cytoskeleton;nucleus;other cell component	translation activity;other molecular function	Pf01926, Pf06071	29789	ENSG00000138430	OLA1	D7EHM2; hsa:29789; Q5BJD7; Q8NCI8; Q96CU1; Q96SV2; Q9NTK5; Q9P1D3; Q9UNY9; Q9Y6G4
P27708	CAD protein [OS=Homo sapiens]	0	16.496	3	5	7	5	2225	242.8	6.46	22.18	5	protein metabolism;other metabolic processes	cytosol;nucleus;other cell component	kinase activity;other molecular function	Pf00117, Pf00185, Pf00988, Pf01979, Pf02142, Pf02729, Pf02786, Pf02787	790	ENSG00000084774	CAD	D6W552; hsa:790; P27708; Q6P0Q0; Q96CK3
Q96K76	Ubiquitin carboxyl-terminal hydrolase 47 [OS=Homo sapiens]	0.009	2.311	1	1	1	1	1375	157.2	5.08	2.07	1	protein metabolism;DNA metabolism;other metabolic processes;stress response;signal transduction;other biological processes	cytosol;nucleus;other cell component	other molecular function	Pf00443, Pf19718	55031	ENSG00000170242	USP47	B3KXF5; E9PM46; hsa:55031; Q658U0; Q86Y73; Q8TEP6; Q96K76; Q9BWI0; Q9NWN1
Q5TEC6	Histone H3-7 [OS=Homo sapiens]	0	17.377	38	7	28	1	136	15.4	11.27	70.96	7		other cell component	nucleic acid binding activity;other molecular function	Pf00125		ENSG00000273213	H3-7	Q5TEC6
Q9NT62	Ubiquitin-like-conjugating enzyme ATG3 [OS=Homo sapiens]	0.001	4.558	4	1	1	1	314	35.8	4.74	3.44	1	cell organization and biogenesis;protein metabolism;other metabolic processes;transport;other biological processes	cytosol;other cell component	other molecular function	Pf03987	64422	ENSG00000144848	ATG3	hsa:64422; Q6PKC5; Q9H6L9; Q9NT62
Q15020	Squamous cell carcinoma antigen recognized by T-cells 3 [OS=Homo sapiens]	0	14.742	4	3	3	3	963	109.9	5.57	13.01	3	cell cycle OR cell proliferation;cell organization and biogenesis;RNA metabolism OR transcription;other metabolic processes;other biological processes	nucleus;other cell component	nucleic acid binding activity;other molecular function	Pf00076, Pf05391, Pf16605	9733	ENSG00000075856	SART3	A8K2E4; B7ZKM0; hsa:9733; Q15020; Q2M2H0; Q58F06; Q8IUS1; Q96J95
P05109	Protein S100-A8 [OS=Homo sapiens]	0	9.218	33	3	3	3	93	10.8	7.03	7.04	3	cell adhesion;cell-cell signaling;protein metabolism;other metabolic processes;stress response;transport;developmental processes;other biological processes	non-structural extracellular;plasma membrane;other membranes;cytosol;cytoskeleton;other cell component	signal transduction activity or receptor binding;cytoskeletal activity;other molecular function	Pf01023	6279	ENSG00000143546	S100A8	A8K5L3; D3DV37; hsa:6279; P05109; Q5SY70; Q9UC84; Q9UC92; Q9UCJ0; Q9UCM6
P20700	Lamin-B1 [OS=Homo sapiens]	0	13.503	9	5	8	4	586	66.4	5.16	20.86	5	cell organization and biogenesis;transport;other biological processes	other membranes;cytoskeleton;nucleus	cytoskeletal activity;nucleic acid binding activity;other molecular function	Pf00038, Pf00932	4001	ENSG00000113368	LMNB1	B2R6J6; hsa:4001; P20700; Q3SYN7; Q96EI6
Q6UXH8	Collagen and calcium-binding EGF domain-containing protein 1 [OS=Homo sapiens]	0	10.634	11	4	4	4	406	44.1	7.58	10.21	4	developmental processes;other biological processes	non-structural extracellular;extracellular matrix;other cell component	other molecular function	Pf01391, Pf07645	147372	ENSG00000183287	CCBE1	hsa:147372; Q6MZX5; Q6UXH8; Q86SS2; Q8TF19
Q14533	Keratin, type II cuticular Hb1 [OS=Homo sapiens]	0.001	5.274	3	2	11	1	505	54.9	5.47	22.72	2	cell organization and biogenesis;other biological processes	cytosol;cytoskeleton	bone, tooth or skin structural activity	Pf00038, Pf16208	3887	ENSG00000205426	KRT81	hsa:3887; Q14533; Q14846; Q16274; Q17R48; Q8WU52; Q9BR74
Q9NRX5	Serine incorporator 1 [OS=Homo sapiens]	0	8.07	7	3	4	3	453	50.5	5.85	8.06	3	other metabolic processes;other biological processes	plasma membrane;other membranes;ER/Golgi	other molecular function	Pf03348	57515	ENSG00000111897	SERINC1	B3KY69; E1P565; hsa:57515; O75655; Q7Z2F5; Q8TAG1; Q9NRX5; Q9NTH8; Q9ULG7
Q8N2Q7	Neuroligin-1 [OS=Homo sapiens]	0.002	4.33	1	1	1	1	863	96.3	6.39	3.28	1	cell adhesion;cell-cell signaling;cell organization and biogenesis;transport;developmental processes;signal transduction;other biological processes	non-structural extracellular;plasma membrane;other membranes;ER/Golgi;other cell component	signal transduction activity or receptor binding;other molecular function	Pf00135	22871	ENSG00000169760	NLGN1	D2X2H5; hsa:22871; Q8N2Q7; Q9UPT2
Q9ULV4	Coronin-1C [OS=Homo sapiens]	0.001	7.311	5	3	6	3	474	53.2	7.08	11.72	3	cell organization and biogenesis;transport;developmental processes;signal transduction;other biological processes	plasma membrane;other membranes;cytoskeleton;other cytoplasmic organelle;other cell component	cytoskeletal activity;other molecular function	Pf00400, Pf08953, Pf16300	23603	ENSG00000110880	CORO1C	A7MAP0; A7MAP1; B3KU12; hsa:23603; Q9NSK5; Q9ULV4
Q8N7H5	RNA polymerase II-associated factor 1 homolog [OS=Homo sapiens]	0	8.359	6	2	4	2	531	59.9	4.63	11.87	2	cell-cell signaling;protein metabolism;RNA metabolism OR transcription;other metabolic processes;developmental processes;signal transduction;other biological processes	other membranes;nucleus;other cell component	other molecular function	Pf03985	54623	ENSG00000006712	PAF1	hsa:54623; M0QX35; O75239; Q8N7H5; Q9H166; Q9NUU9
Q15276	Rab GTPase-binding effector protein 1 [OS=Homo sapiens]	0.001	5.429	2	2	2	2	862	99.2	5.01	4.09	2	cell organization and biogenesis;transport;signal transduction;other biological processes	other membranes;other cytoplasmic organelle;other cell component	signal transduction activity or receptor binding;enzyme regulator activity;other molecular function	Pf03528, Pf09311	9135	ENSG00000029725	RABEP1	B2RAG7; hsa:9135; O95369; Q15276; Q8IVX3
P07477	Serine protease 1 [OS=Homo sapiens]	0.001	6.95	11	2	9	2	247	26.5	6.51	10.68	2	cell organization and biogenesis;protein metabolism;other biological processes	non-structural extracellular	other molecular function	Pf00089	5644	ENSG00000204983; ENSG00000274247	PRSS1	A1A509; A6NJ71; B2R5I5; hsa:5644; P07477; Q5NV57; Q7M4N3; Q7M4N4; Q92955; Q9HAN4; Q9HAN5; Q9HAN6; Q9HAN7
O75051	Plexin-A2 [OS=Homo sapiens]	0.003	3.03	1	2	2	2	1894	211	6.48	4.31	2	cell organization and biogenesis;developmental processes;signal transduction;other biological processes	plasma membrane;other membranes;other cell component	other molecular function	Pf01403, Pf01437, Pf01833, Pf08337, Pf17960, Pf18020, Pf20170	5362	ENSG00000076356	PLXNA2	A2RTX9; B2RMX7; hsa:5362; O75051; Q6UX61; Q96GN9; Q9BRL1; Q9UIW1
O60832	H/ACA ribonucleoprotein complex subunit DKC1 [OS=Homo sapiens]	0.002	4.267	4	2	2	2	514	57.6	9.42	3.42	2	cell organization and biogenesis;DNA metabolism;RNA metabolism OR transcription;other metabolic processes;other biological processes	nucleus;other cell component	nucleic acid binding activity;other molecular function	Pf01472, Pf01509, Pf08068, Pf16198	1736	ENSG00000130826	DKC1	F5BSB3; hsa:1736; O43845; O60832; Q96G67; Q9Y505
P43251	Biotinidase [OS=Homo sapiens]	0	11.269	6	3	3	3	543	61.1	6.25	11.43	3	other metabolic processes;developmental processes	non-structural extracellular;mitochondrion	other molecular function	Pf00795, Pf19018	686	ENSG00000169814	BTD	A6NHF2; B2R865; B4DFX1; B4DLJ9; B7Z7C9; F8W1Q3; hsa:686; P43251; Q96EM9
Q04206	Transcription factor p65 [OS=Homo sapiens]	0.002	3.43	3	1	2	1	551	60.2	5.68	2.95	1	cell-cell signaling;cell organization and biogenesis;protein metabolism;RNA metabolism OR transcription;other metabolic processes;stress response;developmental processes;signal transduction;other biological processes	cytosol;nucleus;other cell component	cytoskeletal activity;nucleic acid binding activity;other molecular function	Pf00554, Pf16179	5970	ENSG00000173039	RELA	hsa:5970; Q04206; Q6GTV1; Q6SLK1
Q92824	Proprotein convertase subtilisin/kexin type 5 [OS=Homo sapiens]	0.001	5.646	1	2	2	2	1860	206.8	6.1	4.68	2	cell-cell signaling;protein metabolism;other metabolic processes;transport;developmental processes;other biological processes	non-structural extracellular;other membranes;ER/Golgi	other molecular function	Pf00082, Pf01483, Pf14843, Pf16470	5125	ENSG00000099139	PCSK5	F5H2G7; hsa:5125; Q13527; Q92824; Q96EP4
Q9NVJ2	ADP-ribosylation factor-like protein 8B [OS=Homo sapiens]	0.001	6.366	10	2	4	1	186	21.5	8.43	11.22	2	cell cycle OR cell proliferation;cell organization and biogenesis;other metabolic processes;stress response;transport;other biological processes	other membranes;cytosol;cytoskeleton;other cytoplasmic organelle;other cell component	cytoskeletal activity;other molecular function	Pf00025	55207	ENSG00000134108	ARL8B	B4DI85; hsa:55207; Q9NVJ2
O43293	Death-associated protein kinase 3 [OS=Homo sapiens]	0.001	4.552	3	1	1	1	454	52.5	6.89	3.39	1	cell organization and biogenesis;protein metabolism;other metabolic processes;stress response;signal transduction;other biological processes	cytosol;nucleus;other cell component	kinase activity;other molecular function	Pf00069	1613	ENSG00000167657	DAPK3	A0AVN4; B3KQE2; hsa:1613; O43293; Q05JY4
P61966	AP-1 complex subunit sigma-1A [OS=Homo sapiens]	0	8.913	10	1	3	1	158	18.7	5.73	10.17	1	cell organization and biogenesis;transport;other biological processes	plasma membrane;other membranes;cytosol;ER/Golgi;other cytoplasmic organelle;other cell component	other molecular function	Pf01217	1174	ENSG00000106367	AP1S1	B2R5D8; hsa:1174; P61966; P82267; Q00382; Q53YA7; Q9BTN4; Q9UDW9
Q9UI10	Translation initiation factor eIF-2B subunit delta [OS=Homo sapiens]	0.001	5.951	6	2	2	2	523	57.5	9.38	4.79	2	protein metabolism;other metabolic processes;stress response;developmental processes;signal transduction;other biological processes	cytosol;translational apparatus;other cell component	nucleic acid binding activity;other molecular function	Pf01008	8890	ENSG00000115211	EIF2B4	hsa:8890; Q53RY7; Q5BJF4; Q9BUV9; Q9UBG4; Q9UI10; Q9UIQ9; Q9UJ95
P48444	Coatomer subunit delta [OS=Homo sapiens]	0.001	5.679	4	2	3	2	511	57.2	6.21	7.56	2	transport;developmental processes;other biological processes	other membranes;cytosol;ER/Golgi		Pf00928, Pf01217	372	ENSG00000095139	ARCN1	B4E1X2; E9PEU4; hsa:372; P48444; Q52M80
P78423	Fractalkine [OS=Homo sapiens]	0.004	2.754	4	2	2	2	397	42.2	6.52	4.79	2	cell adhesion;cell-cell signaling;cell cycle OR cell proliferation;cell organization and biogenesis;stress response;developmental processes;signal transduction;other biological processes	non-structural extracellular;plasma membrane;other membranes;other cell component	signal transduction activity or receptor binding	Pf00048	6376	ENSG00000006210	CX3CL1	hsa:6376; O00672; P78423
P01833	Polymeric immunoglobulin receptor [OS=Homo sapiens]	0.003	2.965	2	1	1	1	764	83.2	5.74	2.68	1	transport;signal transduction;other biological processes	non-structural extracellular;plasma membrane;other membranes;other cytoplasmic organelle;other cell component	other molecular function	Pf07686	5284	ENSG00000162896	PIGR	hsa:5284; P01833; Q68D81; Q8IZY7
Q9NZH0	G-protein coupled receptor family C group 5 member B [OS=Homo sapiens]	0.002	3.1	3	1	3	1	403	44.8	8.24	4.37	1	signal transduction;other biological processes	non-structural extracellular;plasma membrane;other membranes;cytosol;nucleus;other cell component	signal transduction activity or receptor binding;enzyme regulator activity;other molecular function	Pf00003	51704	ENSG00000167191	GPRC5B	D2DFB0; hsa:51704; O75205; Q8NBZ8; Q9NZH0
Q06828	Fibromodulin [OS=Homo sapiens]	0.002	3.983	3	1	1	1	376	43.2	6.04	3.94	1	cell organization and biogenesis;signal transduction	extracellular matrix;ER/Golgi;other cytoplasmic organelle		Pf01462, Pf13855	2331	ENSG00000122176	FMOD	hsa:2331; Q06828; Q15331; Q8IV47
Q9BR76	Coronin-1B [OS=Homo sapiens]	0.001	5.698	4	2	4	2	489	54.2	5.88	6.64	2	cell organization and biogenesis;stress response;other biological processes	plasma membrane;other membranes;cytosol;cytoskeleton;other cell component	cytoskeletal activity;other molecular function	Pf00400, Pf08953, Pf16300	57175	ENSG00000172725	CORO1B	B2RD45; hsa:57175; Q9BR76
Q96FW1	Ubiquitin thioesterase OTUB1 [OS=Homo sapiens]	0.001	5.034	8	2	6	2	271	31.3	4.94	15.03	2	protein metabolism;DNA metabolism;other metabolic processes;stress response;other biological processes	cytosol;nucleus	other molecular function	Pf10275	55611	ENSG00000167770	OTUB1	hsa:55611; Q32Q78; Q96FW1; Q96II3; Q9NXQ4; Q9P0B8
P35573	Glycogen debranching enzyme [OS=Homo sapiens]	0.001	4.69	1	2	2	2	1532	174.7	6.76	2.02	2	other metabolic processes;other biological processes	non-structural extracellular;cytosol;ER/Golgi;nucleus;other cell component	other molecular function	Pf06202, Pf14699, Pf14701, Pf14702	178	ENSG00000162688	AGL	A6NCX7; A6NEK2; D3DT51; hsa:178; P35573; P78354; P78544; Q59H92; Q6AZ90; Q9UF08
Q9NYK5	39S ribosomal protein L39, mitochondrial [OS=Homo sapiens]	0.002	3.747	4	1	1	1	338	38.7	7.65	3.3	1	protein metabolism;other metabolic processes	other membranes;mitochondrion;translational apparatus	other molecular function		54148	ENSG00000154719	MRPL39	C9JYA5; hsa:54148; Q32Q74; Q5QTR3; Q96Q65; Q9BSQ7; Q9BZV6; Q9NX44; Q9NYK5
Q96DA0	Zymogen granule protein 16 homolog B [OS=Homo sapiens]	0.001	5.326	8	1	1	1	208	22.7	7.39	6	1			other molecular function	Pf01419	124220	ENSG00000162078; ENSG00000283056	ZG16B	A6NIY1; B2R4F6; hsa:124220; Q6UW28; Q96DA0
Q92747	Actin-related protein 2/3 complex subunit 1A [OS=Homo sapiens]	0.004	2.741	2	1	2	1	370	41.5	8.18	5.85	1	cell organization and biogenesis	plasma membrane;other membranes;cytosol;cytoskeleton;nucleus;other cell component	cytoskeletal activity	Pf00400	10552	ENSG00000241685	ARPC1A	A4D276; B4DLQ7; D6W5S1; hsa:10552; Q7Z5U8; Q86WU5; Q8IXQ0; Q92747
O95817	BAG family molecular chaperone regulator 3 [OS=Homo sapiens]	0.001	5.425	3	2	2	2	575	61.6	6.95	4.9	2	cell organization and biogenesis;protein metabolism;other metabolic processes;stress response;transport;developmental processes;signal transduction;other biological processes	other membranes;cytosol;cytoskeleton;nucleus;other cell component	other molecular function	Pf00397, Pf02179	9531	ENSG00000151929	BAG3	A8K5L8; hsa:9531; O95817; Q3B763; Q9NT20; Q9P120
Q9NS98	Semaphorin-3G [OS=Homo sapiens]	0.009	2.291	1	1	1	1	782	86.6	7.78	2.14	1	cell organization and biogenesis;developmental processes;signal transduction;other biological processes	non-structural extracellular;plasma membrane;other membranes	signal transduction activity or receptor binding	Pf00047, Pf01403	56920	ENSG00000010319	SEMA3G	hsa:56920; Q7L9D9; Q9H7Q3; Q9NS98
P55809	Succinyl-CoA:3-ketoacid coenzyme A transferase 1, mitochondrial [OS=Homo sapiens]	0.002	3.703	4	1	1	1	520	56.1	7.46	2.68	1	other metabolic processes;stress response;developmental processes;other biological processes	mitochondrion	other molecular function	Pf01144	5019	ENSG00000083720	OXCT1	B2R5V2; B7Z528; hsa:5019; P55809
P03952	Plasma kallikrein [OS=Homo sapiens]	0.009	2.27	1	1	2	1	638	71.3	8.22	5.15	1	protein metabolism;other metabolic processes;stress response;other biological processes	non-structural extracellular;plasma membrane;other membranes;other cell component	other molecular function	Pf00024, Pf00089	3818	ENSG00000164344	KLKB1	A6NH96; B2R8H9; hsa:3818; P03952; Q17RE8; Q17RE9; Q4W5C3
O00408	cGMP-dependent 3',5'-cyclic phosphodiesterase [OS=Homo sapiens]	0.001	5.964	2	2	2	2	941	105.6	5.41	5.46	2	other metabolic processes;developmental processes;signal transduction;other biological processes	plasma membrane;other membranes;cytosol;mitochondrion;ER/Golgi;nucleus;other cell component	other molecular function	Pf00233, Pf01590	5138	ENSG00000186642	PDE2A	B2R646; B3KRV5; E9PGI1; F6W5Z0; hsa:5138; O00408; Q5J791; Q5J792; Q5J793; Q6ZMR1
P53041	Serine/threonine-protein phosphatase 5 [OS=Homo sapiens]	0.001	4.572	6	2	2	2	499	56.8	6.28	2.96	2	cell cycle OR cell proliferation;protein metabolism;DNA metabolism;RNA metabolism OR transcription;other metabolic processes;stress response;signal transduction;other biological processes	plasma membrane;other membranes;cytosol;nucleus;other cell component	cytoskeletal activity;nucleic acid binding activity;other molecular function	Pf00149, Pf00515, Pf08321	5536	ENSG00000011485	PPP5C	hsa:5536; P53041; Q16722; Q53XV2
Q92696	Geranylgeranyl transferase type-2 subunit alpha [OS=Homo sapiens]	0.001	5.425	4	2	3	2	567	65	5.67	8.82	2	protein metabolism;other metabolic processes;other biological processes	plasma membrane;other membranes;cytosol;other cell component	other molecular function	Pf01239, Pf07711	5875	ENSG00000100949; ENSG00000285193	RABGGTA	A8K5N2; D3DS69; hsa:5875; Q92696
Q13616	Cullin-1 [OS=Homo sapiens]	0.001	4.914	2	2	4	2	776	89.6	8	9.52	2	cell cycle OR cell proliferation;protein metabolism;other metabolic processes;signal transduction;other biological processes	plasma membrane;other membranes;cytosol;nucleus;other cell component	other molecular function	Pf00888, Pf10557	8454	ENSG00000055130	CUL1	D3DWG3; hsa:8454; O60719; Q08AL6; Q13616; Q8IYW1
P13646	Keratin, type I cytoskeletal 13 [OS=Homo sapiens]	0	47.775	15	10	71	2	458	49.6	4.96	209.72	10	cell organization and biogenesis;stress response;other biological processes	cytosol;cytoskeleton	other molecular function	Pf00038	3860	ENSG00000171401	KRT13	hsa:3860; P13646; Q53G54; Q6AZK5; Q8N240
Q9HD42	Charged multivesicular body protein 1a [OS=Homo sapiens]	0.002	3.478	7	2	2	2	196	21.7	8.06	4.16	2	cell cycle OR cell proliferation;cell organization and biogenesis;protein metabolism;other metabolic processes;stress response;transport;other biological processes	plasma membrane;other membranes;cytosol;cytoskeleton;nucleus;other cytoplasmic organelle;other cell component	other molecular function	Pf03357	5119	ENSG00000131165	CHMP1A	A2RU09; hsa:5119; Q14468; Q15779; Q96G31; Q9HD42
P35858	Insulin-like growth factor-binding protein complex acid labile subunit [OS=Homo sapiens]	0.001	4.907	2	1	2	1	605	66	6.79	9.17	1	cell adhesion;signal transduction	non-structural extracellular;extracellular matrix	other molecular function	Pf01462, Pf13855	3483	ENSG00000099769	IGFALS	B4DZY8; E9PGU3; hsa:3483; P35858
Q14624	Inter-alpha-trypsin inhibitor heavy chain H4 [OS=Homo sapiens]	0	7.871	2	2	5	2	930	103.3	6.98	5.82	2	other metabolic processes;stress response;other biological processes	non-structural extracellular;plasma membrane;other membranes;other cell component	enzyme regulator activity	Pf00092, Pf06668, Pf08487	3700	ENSG00000055955	ITIH4	B7Z545; E9PGN5; hsa:3700; Q14624; Q15135; Q9P190; Q9UQ54
O95347	Structural maintenance of chromosomes protein 2 [OS=Homo sapiens]	0.002	4.289	1	1	1	1	1197	135.6	8.43	3.41	1	cell cycle OR cell proliferation;cell organization and biogenesis;other biological processes	cytosol;nucleus;other cell component	nucleic acid binding activity;other molecular function	Pf02463, Pf06470	10592	ENSG00000136824	SMC2	hsa:10592; O95347; Q6IEE0; Q9P1P2
Q15286	Ras-related protein Rab-35 [OS=Homo sapiens]	0	13.108	22	5	9	2	201	23	8.29	23.45	5	cell cycle OR cell proliferation;cell organization and biogenesis;transport;developmental processes;signal transduction;other biological processes	plasma membrane;other membranes;cytosol;ER/Golgi;other cytoplasmic organelle;other cell component	other molecular function	Pf00071	11021	ENSG00000111737	RAB35	B2R6E0; B4E390; hsa:11021; Q15286
Q9NVD7	Alpha-parvin [OS=Homo sapiens]	0.002	4.109	4	1	3	1	372	42.2	5.95	7.52	1	cell adhesion;cell organization and biogenesis;developmental processes;other biological processes	plasma membrane;other membranes;cytosol;cytoskeleton;nucleus;other cell component	enzyme regulator activity;cytoskeletal activity	Pf00307	55742	ENSG00000197702	PARVA	hsa:55742; Q96C85; Q9HA48; Q9NVD7
P0DOX8	Immunoglobulin lambda-1 light chain [OS=Homo sapiens]	0	8.617	15	3	4	2	216	22.8	6.76	8	3	other biological processes	non-structural extracellular;plasma membrane;other membranes;other cell component		Pf07654, Pf07686
P04114	Apolipoprotein B-100 [OS=Homo sapiens]	0	56.756	3	14	64	14	4563	515.3	7.05	185.48	14	cell organization and biogenesis;protein metabolism;other metabolic processes;transport;developmental processes;other biological processes	non-structural extracellular;plasma membrane;other membranes;cytosol;ER/Golgi;other cytoplasmic organelle;other cell component	signal transduction activity or receptor binding;transporter activity;other molecular function	Pf01347, Pf06448, Pf09172, Pf12491	338	ENSG00000084674	APOB	hsa:338; O00502; P04114; P78479; P78480; P78481; Q13779; Q13785; Q13786; Q13787; Q13788; Q4ZG63; Q53QC8; Q7Z600; Q9UMN0
Q99816	Tumor susceptibility gene 101 protein [OS=Homo sapiens]	0	14.422	12	3	5	3	390	43.9	6.46	19.09	3	cell cycle OR cell proliferation;cell organization and biogenesis;protein metabolism;RNA metabolism OR transcription;other metabolic processes;transport;other biological processes	non-structural extracellular;plasma membrane;other membranes;cytosol;cytoskeleton;nucleus;other cytoplasmic organelle;other cell component	nucleic acid binding activity;other molecular function	Pf05743, Pf09454	7251	ENSG00000074319	TSG101	hsa:7251; Q99816; Q9BUM5

## Sheet: 95% vs 21%
Accession	Description	Exp. q-value: Combined	Sum PEP Score	Coverage [%]	# Peptides	# PSMs	# Unique Peptides	# AAs	MW [kDa]	calc. pI	Score Sequest HT: Sequest HT	# Peptides (by Search Engine): Sequest HT	Biological Process	Cellular Component	Molecular Function	Pfam IDs	Entrez Gene ID	Ensembl Gene ID	Gene Symbol	Gene ID	Reactome Pathways
Q13185	Chromobox protein homolog 3 [OS=Homo sapiens]	0.001	7.128	14	2	2	2	183	20.8	5.33	7.2	2	cell organization and biogenesis;stress response;other biological processes	other membranes;cytoskeleton;nucleus;other cell component	other molecular function	Pf00385, Pf01393	11335	ENSG00000122565	CBX3	hsa:11335; Q13185; Q96CD7; Q99409; Q9BVS3; Q9P0Z6	RNA Polymerase I Promoter Escape; ERCC6 (CSB) and EHMT2 (G9a) positively regulate rRNA expression; Transcriptional Regulation by E2F6
Q16853	Membrane primary amine oxidase [OS=Homo sapiens]	0.002	3.85	2	2	4	2	763	84.6	6.52	8.97	2	cell adhesion;other metabolic processes;stress response;other biological processes	plasma membrane;other membranes;ER/Golgi;other cytoplasmic organelle;other cell component	other molecular function	Pf01179, Pf02727, Pf02728	8639	ENSG00000131471	AOC3	B2RCI5; hsa:8639; K7ESB3; L0L8N9; Q16853; Q45F94	Phase I - Functionalization of compounds
O95772	STARD3 N-terminal-like protein [OS=Homo sapiens]	0.001	4.828	9	2	2	2	234	26.6	4.81	3.03	2	cell organization and biogenesis;transport	other membranes;cytosol;other cytoplasmic organelle;other cell component	other molecular function	Pf10457	83930	ENSG00000010270	STARD3NL	A4D1X0; hsa:83930; O95772	Pregnenolone biosynthesis
O75144	ICOS ligand [OS=Homo sapiens]	0.004	2.793	3	1	2	1	302	33.3	5.31	6.8	1	stress response;signal transduction;other biological processes	plasma membrane;other membranes;other cell component	signal transduction activity or receptor binding;other molecular function	Pf07686	23308	ENSG00000160223	ICOSLG	A8MUZ1; hsa:23308; O75144; Q9HD18; Q9NRQ1	Costimulation by the CD28 family
Q00341	Vigilin [OS=Homo sapiens]	0.001	5.023	2	3	3	3	1268	141.4	6.87	2.05	3	other metabolic processes;transport	non-structural extracellular;plasma membrane;other membranes;cytosol;nucleus;other cell component	nucleic acid binding activity;other molecular function	Pf00013	3069	ENSG00000115677	HDLBP	B4DTQ2; E7EM71; hsa:3069; Q00341; Q53QU2; Q9UCY3	HDL clearance
P52943	Cysteine-rich protein 2 [OS=Homo sapiens]	0	8.794	17	2	2	2	208	22.5	8.72	7.52	2	other biological processes	other cell component	other molecular function	Pf00412	1397	ENSG00000182809	CRIP2	A1A4U1; B7Z6C0; E9PD13; hsa:1397; P52943
O14976	Cyclin-G-associated kinase [OS=Homo sapiens]	0.003	2.983	1	1	1	1	1311	143.1	5.73	2.07	1	cell cycle OR cell proliferation;cell organization and biogenesis;protein metabolism;other metabolic processes;transport;other biological processes	cytosol;ER/Golgi;other cell component	kinase activity;other molecular function	Pf00069, Pf10409	2580	ENSG00000178950	GAK	hsa:2580; O14976; Q5U4P5; Q9BVY6	Golgi Associated Vesicle Biogenesis; Clathrin-mediated endocytosis
P01031	Complement C5 [OS=Homo sapiens]	0.002	3.415	1	1	2	1	1676	188.2	6.52	5.85	1	stress response;developmental processes;signal transduction;other biological processes	non-structural extracellular;plasma membrane;other membranes	signal transduction activity or receptor binding;enzyme regulator activity	Pf00207, Pf01759, Pf01821, Pf01835, Pf07677, Pf07678, Pf07703, Pf17789, Pf17790, Pf17791	727	ENSG00000106804	C5	hsa:727; P01031; Q14CJ0; Q27I61	Regulation of Complement cascade; G alpha (i) signalling events; Peptide ligand-binding receptors; Activation of C3 and C5; Terminal pathway of complement
Q9Y333	U6 snRNA-associated Sm-like protein LSm2 [OS=Homo sapiens]	0.001	7.044	28	2	4	2	95	10.8	6.52	18.75	2	cell organization and biogenesis;RNA metabolism OR transcription;other metabolic processes	cytosol;nucleus;other cell component	nucleic acid binding activity;other molecular function	Pf01423	57819	ENSG00000172850; ENSG00000204392; ENSG00000224979; ENSG00000225998; ENSG00000231502; ENSG00000236826	LSM2	hsa:57819; Q6FGG1; Q9Y333	mRNA Splicing - Major Pathway; mRNA decay by 5' to 3' exoribonuclease
P47895	Aldehyde dehydrogenase family 1 member A3 [OS=Homo sapiens]	0	11.348	8	4	10	3	512	56.1	7.25	30.53	4	cell organization and biogenesis;other metabolic processes;developmental processes;other biological processes	cytosol;other cell component	other molecular function	Pf00171	220	ENSG00000184254	ALDH1A3	hsa:220; P47895; Q6NT64	RA biosynthesis pathway
Q02952	A-kinase anchor protein 12 [OS=Homo sapiens]	0	21.583	6	6	10	6	1782	191.4	4.41	29.2	6	signal transduction;other biological processes	plasma membrane;other membranes;cytosol;cytoskeleton;other cell component	other molecular function	Pf03832, Pf10522	9590	ENSG00000131016	AKAP12	hsa:9590; O00310; O00498; Q02952; Q4LE68; Q5SZ80; Q5TGN1; Q68D82; Q99970	RHOD GTPase cycle; RHOF GTPase cycle
Q7Z2W4	Zinc finger CCCH-type antiviral protein 1 [OS=Homo sapiens]	0.001	7.706	3	2	4	2	902	101.4	8.4	12.61	2	stress response;other biological processes	cytosol;nucleus;other cell component	other molecular function	Pf00644, Pf02825, Pf18606, Pf18633	56829	ENSG00000105939	ZC3HAV1	A4D1R2; A4D1S4; hsa:56829; Q7Z2W4; Q8IW57; Q8TAJ3; Q96N79; Q9H8R9; Q9P0Y7	Signaling by BRAF and RAF1 fusions
Q9BQA1	Methylosome protein 50 [OS=Homo sapiens]	0.001	4.704	12	1	1	1	342	36.7	5.17	7.2	1	cell cycle OR cell proliferation;cell organization and biogenesis;protein metabolism;RNA metabolism OR transcription;other metabolic processes;developmental processes;other biological processes	cytosol;ER/Golgi;nucleus;other cell component	nucleic acid binding activity;other molecular function	Pf00400	79084	ENSG00000116455	WDR77	B3KMW6; B4DP38; hsa:79084; Q3LID2; Q53FU2; Q6JZZ5; Q96GK4; Q9BQA1; Q9BWY3	RMTs methylate histone arginines; snRNP Assembly
P01889	HLA class I histocompatibility antigen, B alpha chain [OS=Homo sapiens]	0	29.238	27	7	12	2	362	40.4	5.85	38.56	7	stress response;other biological processes	plasma membrane;other membranes;ER/Golgi;other cytoplasmic organelle;other cell component	signal transduction activity or receptor binding;other molecular function	Pf00129, Pf06623, Pf07654	3106	ENSG00000234745	HLA-B	A0A2I6Q7B5; B0V0B8; G3GN01; hsa:3106; O02862; O02956; O02957; O02960; O19555; O19556; O19595; O19615; O19624; O19625; O19627; O19641; O19651; O19675; O19692; O19758; O19779; O19783; O46702; O62897; O62901; O62915; O62917; O62919; O77933; O77959; O78053; O78138; O78160; O78163; O78172; O78173; O78180; O78217; O95730; O98140; P01889; P01890; P03989; P10317; P10318; P10319; P10320; P18463; P18464; P…	Immunoregulatory interactions between a Lymphoid and a non-Lymphoid cell; ER-Phagosome pathway; SARS-CoV-2 activates/modulates innate and adaptive immune responses; Neutrophil degranulation; Interferon gamma signaling; Interferon alpha/beta signaling; Antigen Presentation: Folding, assembly and peptide loading of class I MHC; Endosomal/Vacuolar pathway; DAP12 interactions
Q8NE71	ATP-binding cassette sub-family F member 1 [OS=Homo sapiens]	0	8.193	3	2	3	2	845	95.9	6.8	9.38	2	protein metabolism;other metabolic processes;stress response;other biological processes	cytosol;translational apparatus;nucleus;other cell component	translation activity;nucleic acid binding activity;other molecular function	Pf00005, Pf12848	23	ENSG00000204574; ENSG00000206490; ENSG00000225989; ENSG00000231129; ENSG00000232169; ENSG00000236149; ENSG00000236342	ABCF1	A2BF75; hsa:23; O14897; Q69YP6; Q8NE71	ABC-family proteins mediated transport
Q2M389	WASH complex subunit 4 [OS=Homo sapiens]	0.007	2.394	1	1	1	1	1173	136.3	7.44	3.28	1	cell organization and biogenesis;transport;other biological processes	other membranes;nucleus;other cytoplasmic organelle;other cell component		Pf14744, Pf14745, Pf14746	23325	ENSG00000136051	WASHC4	hsa:23325; Q2M389; Q2NL83; Q8IW61; Q8N5W7; Q9NVD6; Q9UPW7
O75348	V-type proton ATPase subunit G 1 [OS=Homo sapiens]	0	12.164	19	3	6	3	118	13.7	8.79	17.58	3	cell organization and biogenesis;transport;other biological processes	plasma membrane;other membranes;cytosol;other cytoplasmic organelle;other cell component	transporter activity;other molecular function	Pf03179	9550	ENSG00000136888	ATP6V1G1	hsa:9550; O75348; Q6IB33	Amino acids regulate mTORC1; ROS and RNS production in phagocytes; Insulin receptor recycling; Transferrin endocytosis and recycling; Ion channel transport
Q9NR30	Nucleolar RNA helicase 2 [OS=Homo sapiens]	0.001	5.572	3	2	2	2	783	87.3	9.28	6.54	2	cell organization and biogenesis;RNA metabolism OR transcription;other metabolic processes;stress response;other biological processes	cytosol;mitochondrion;nucleus;other cell component	nucleic acid binding activity;other molecular function	Pf00270, Pf00271, Pf08152	9188	ENSG00000165732	DDX21	B2RDL0; hsa:9188; Q13436; Q5VX41; Q68D35; Q9NR30	B-WICH complex positively regulates rRNA expression; Major pathway of rRNA processing in the nucleolus and cytosol
P13667	Protein disulfide-isomerase A4 [OS=Homo sapiens]	0	35.313	24	12	17	12	645	72.9	5.07	40.41	12	stress response;transport;other biological processes	non-structural extracellular;ER/Golgi;other cell component	other molecular function	Pf00085, Pf13848	9601	ENSG00000155660	PDIA4	A8K4K6; hsa:9601; P13667; Q549T6
P43487	Ran-specific GTPase-activating protein [OS=Homo sapiens]	0.002	3.519	4	1	1	1	201	23.3	5.29	2.65	1	transport;signal transduction;other biological processes	cytosol;cytoskeleton;nucleus;other cell component	enzyme regulator activity;other molecular function	Pf00638	5902	ENSG00000099901	RANBP1	hsa:5902; P43487; Q53EY3	Rev-mediated nuclear export of HIV RNA
Q9Y5Y7	Lymphatic vessel endothelial hyaluronic acid receptor 1 [OS=Homo sapiens]	0	8.594	7	3	3	3	322	35.2	8.28	5.02	3	cell adhesion;other metabolic processes;stress response;transport;other biological processes	plasma membrane;other membranes	other molecular function	Pf00193	10894	ENSG00000133800	LYVE1	hsa:10894; Q8TC18; Q9UNF4; Q9Y5Y7	Hyaluronan uptake and degradation
Q5T5P2	Sickle tail protein homolog [OS=Homo sapiens]	0.007	2.439	0	1	1	1	1943	214	7.06	2.17	1	developmental processes	cytoskeleton;other cell component		Pf03915	56243	ENSG00000120549	KIAA1217	A5LHW9; A6NLF3; A6PVQ5; A6PVQ6; A6PVQ7; B9EGK4; hsa:56243; Q4KMG4; Q5T5P2; Q5T5P3; Q5T7H3; Q6MZZ6; Q6ZUI4; Q8WV45; Q9NSR2; Q9ULK3
Q7LG56	Ribonucleoside-diphosphate reductase subunit M2 B [OS=Homo sapiens]	0.002	3.723	3	1	1	1	351	40.7	4.97	3.22	1	cell organization and biogenesis;DNA metabolism;other metabolic processes;stress response;developmental processes;other biological processes	cytosol;mitochondrion;nucleus	other molecular function	Pf00268	50484	ENSG00000048392	RRM2B	B4E2N4; hsa:50484; Q17R22; Q75PQ6; Q75PQ7; Q75PY8; Q75PY9; Q7LG56; Q86YE3; Q9NPD6; Q9NTD8; Q9NUW3	TP53 Regulates Metabolic Genes; Interconversion of nucleotide di- and triphosphates
P39687	Acidic leucine-rich nuclear phosphoprotein 32 family member A [OS=Homo sapiens]	0.002	4.091	6	2	3	2	249	28.6	4.09	7.15	2	transport;signal transduction;other biological processes	ER/Golgi;nucleus;other cell component	other molecular function	Pf14580	8125	ENSG00000140350	ANP32A	B2R6T4; hsa:8125; P39687; Q53FK4; Q5J8L8; Q7M4N6	HuR (ELAVL1) binds and stabilizes mRNA
Q9UJW0	Dynactin subunit 4 [OS=Homo sapiens]	0	20.451	18	3	8	3	460	52.3	7.34	31.97	3		cytosol;cytoskeleton;nucleus;other cell component		Pf05502	51164	ENSG00000132912	DCTN4	B3KWW0; D3DQH0; E5RGT5; hsa:51164; Q8TAN8; Q9UJW0	HSP90 chaperone cycle for steroid hormone receptors (SHR) in the presence of ligand; MHC class II antigen presentation; COPI-mediated anterograde transport; COPI-independent Golgi-to-ER retrograde traffic
P19320	Vascular cell adhesion protein 1 [OS=Homo sapiens]	0.001	6.849	4	3	4	3	739	81.2	5.22	8.16	3	cell adhesion;other metabolic processes;stress response;developmental processes;signal transduction;other biological processes	non-structural extracellular;plasma membrane;other membranes;cytoskeleton;ER/Golgi;other cytoplasmic organelle;other cell component	signal transduction activity or receptor binding;other molecular function	Pf00047, Pf05790, Pf07679, Pf13927	7412	ENSG00000162692	VCAM1	A8K6R7; B4DKS4; E9PDD1; hsa:7412; P19320; Q6NUP8	Integrin cell surface interactions; Interleukin-4 and Interleukin-13 signaling; Immunoregulatory interactions between a Lymphoid and a non-Lymphoid cell; Interferon gamma signaling
Q02880	DNA topoisomerase 2-beta [OS=Homo sapiens]	0.002	4.073	1	2	3	2	1626	183.2	8	4.97	2	cell cycle OR cell proliferation;cell organization and biogenesis;DNA metabolism;other metabolic processes;developmental processes;other biological processes	cytosol;nucleus;other cell component	nucleic acid binding activity;other molecular function	Pf00204, Pf00521, Pf01751, Pf02518, Pf08070, Pf16898	7155	ENSG00000077097	TOP2B	hsa:7155; Q02880; Q13600; Q9UMG8; Q9UQP8	SUMOylation of DNA replication proteins
Q96D15	Reticulocalbin-3 [OS=Homo sapiens]	0.001	6.759	9	2	2	2	328	37.5	4.89	4.87	2	protein metabolism;other metabolic processes;stress response;transport;developmental processes;other biological processes	ER/Golgi;other cell component	other molecular function	Pf13202	57333	ENSG00000142552	RCN3	hsa:57333; Q96D15; Q9HBZ8
Q86Y46	Keratin, type II cytoskeletal 73 [OS=Homo sapiens]	0	25.071	9	6	20	1	540	58.9	7.23	52.27	6	cell organization and biogenesis;other biological processes	cytosol;cytoskeleton	bone, tooth or skin structural activity	Pf00038, Pf16208	319101	ENSG00000186049	KRT73	hsa:319101; Q32MB2; Q86Y46	Formation of the cornified envelope
Q99848	Probable rRNA-processing protein EBP2 [OS=Homo sapiens]	0.002	3.875	3	1	1	1	306	34.8	10.1	3.19	1	RNA metabolism OR transcription;other metabolic processes;other biological processes	nucleus;other cell component		Pf05890	10969	ENSG00000117395	EBNA1BP2	hsa:10969; Q96A66; Q99848	Major pathway of rRNA processing in the nucleolus and cytosol
Q13617	Cullin-2 [OS=Homo sapiens]	0.003	2.906	2	1	2	1	745	86.9	6.92	4.11	1	cell cycle OR cell proliferation;protein metabolism;other metabolic processes;signal transduction	cytosol;nucleus;other cell component	other molecular function	Pf00888, Pf10557	8453	ENSG00000108094	CUL2	B3KT95; B7Z6K8; D3DRY6; G3V1S2; hsa:8453; O00200; Q13617; Q5T2B6; Q9UNF9	Regulation of expression of SLITs and ROBOs; Antigen processing: Ubiquitination & Proteasome degradation; Oxygen-dependent proline hydroxylation of Hypoxia-inducible Factor Alpha; Neddylation
Q9Y371	Endophilin-B1 [OS=Homo sapiens]	0.001	6.091	6	2	2	2	365	40.8	6.04	5.58	2	cell organization and biogenesis;other metabolic processes;stress response;other biological processes	other membranes;cytosol;mitochondrion;ER/Golgi;other cytoplasmic organelle;other cell component	other molecular function	Pf03114, Pf14604	51100	ENSG00000097033	SH3GLB1	B4E182; hsa:51100; Q5H8U5; Q9H3Z0; Q9NR47; Q9NYA9; Q9Y371
P48723	Heat shock 70 kDa protein 13 [OS=Homo sapiens]	0.007	2.373	1	1	2	1	471	51.9	5.76	4.33	1	stress response;other biological processes	mitochondrion;ER/Golgi;other cell component	other molecular function	Pf00012	6782	ENSG00000155304	HSPA13	B2R616; hsa:6782; P48723; Q8NE40	Regulation of HSF1-mediated heat shock response
Q92542	Nicastrin [OS=Homo sapiens]	0.001	5.294	3	2	2	2	709	78.4	5.99	4.69	2	cell cycle OR cell proliferation;protein metabolism;other metabolic processes;developmental processes;signal transduction;other biological processes	plasma membrane;other membranes;mitochondrion;ER/Golgi;other cytoplasmic organelle;other cell component	signal transduction activity or receptor binding;other molecular function	Pf05450, Pf18266	23385	ENSG00000162736	NCSTN	hsa:23385; Q5T207; Q5T208; Q86VV5; Q92542	Degradation of the extracellular matrix; Neutrophil degranulation; Amyloid fiber formation; Activated NOTCH1 Transmits Signal to the Nucleus; Constitutive Signaling by NOTCH1 PEST Domain Mutants; Constitutive Signaling by NOTCH1 HD+PEST Domain Mutants; NOTCH2 Activation and Transmission of Signal to the Nucleus; Nuclear signaling by ERBB4; EPH-ephrin mediated repulsion of cells; NOTCH4 Activation…
O95967	EGF-containing fibulin-like extracellular matrix protein 2 [OS=Homo sapiens]	0.007	2.448	3	1	1	1	443	49.4	4.94	1.73	1	cell organization and biogenesis;developmental processes;other biological processes	non-structural extracellular;extracellular matrix	extracellular structural activity;other molecular function	Pf07645, Pf12662	30008	ENSG00000172638	EFEMP2	A8K7R4; B3KM31; B3KQT1; hsa:30008; O75967; O95967	Molecules associated with elastic fibres
O94874	E3 UFM1-protein ligase 1 [OS=Homo sapiens]	0.002	3.105	2	1	1	1	794	89.5	6.79	3.73	1	cell organization and biogenesis;protein metabolism;DNA metabolism;other metabolic processes;stress response;other biological processes	other membranes;cytosol;ER/Golgi;nucleus;other cell component	other molecular function	Pf09743	23376	ENSG00000014123	UFL1	A0PJ53; B4DJ57; C0H5X5; hsa:23376; O94874; Q8N765; Q9NTQ0	Antigen processing: Ubiquitination & Proteasome degradation
P46109	Crk-like protein [OS=Homo sapiens]	0.005	2.625	4	1	2	1	303	33.8	6.74	1.97	1	cell-cell signaling;cell organization and biogenesis;other metabolic processes;stress response;developmental processes;signal transduction;other biological processes	plasma membrane;other membranes;cytosol;nucleus;other cell component	signal transduction activity or receptor binding;other molecular function	Pf00017, Pf00018, Pf07653	1399	ENSG00000099942	CRKL	A8KA44; D3DX35; hsa:1399; P46109	Frs2-mediated activation; Regulation of signaling by CBL; Downstream signal transduction; Erythropoietin activates RAS; MET activates RAP1 and RAC1; MET receptor recycling
O95361	Tripartite motif-containing protein 16 [OS=Homo sapiens]	0.001	6.371	4	2	3	2	564	63.9	5.49	7.61	2	protein metabolism;other metabolic processes;other biological processes	plasma membrane;other membranes;cytosol;nucleus;other cell component	nucleic acid binding activity;other molecular function	Pf00622, Pf00643, Pf13765	10626	ENSG00000221926	TRIM16	hsa:10626; O95361; Q6IAL8; Q7Z6I2; Q96BE8; Q96J43
Q86V48	Leucine zipper protein 1 [OS=Homo sapiens]	0.002	3.298	1	1	1	1	1076	120.2	8.5	2.93	1	developmental processes	cytoskeleton;nucleus;other cell component			7798	ENSG00000169641	LUZP1	hsa:7798; Q5TH93; Q86V48; Q8N4X3; Q8TEH1
Q15746	Myosin light chain kinase, smooth muscle [OS=Homo sapiens]	0.002	3.445	1	1	2	1	1914	210.6	6.15	4.7	1	cell organization and biogenesis;protein metabolism;other metabolic processes;stress response;developmental processes;other biological processes	plasma membrane;other membranes;cytosol;cytoskeleton;other cell component	cytoskeletal activity;kinase activity;other molecular function	Pf00041, Pf00069, Pf07679, Pf16620	4638	ENSG00000065534	MYLK	B4DUE3; D3DN97; hsa:4638; O95796; O95797; O95798; O95799; Q14844; Q15746; Q16794; Q17S15; Q3ZCP9; Q5MY99; Q5MYA0; Q6P2N0; Q7Z4J0; Q9C0L5; Q9UBG5; Q9UBY6; Q9UIT9	Smooth Muscle Contraction; RHO GTPases activate PAKs
Q9UBV8	Peflin [OS=Homo sapiens]	0.002	3.719	3	1	3	1	284	30.4	6.54	5.12	1	cell organization and biogenesis;transport;developmental processes;other biological processes	other membranes;ER/Golgi;other cell component	other molecular function	Pf13405, Pf13499	553115	ENSG00000162517	PEF1	hsa:553115; Q9UBV8
Q04637	Eukaryotic translation initiation factor 4 gamma 1 [OS=Homo sapiens]	0.003	2.96	1	1	1	1	1599	175.4	5.33	2.75	1	protein metabolism;other metabolic processes;stress response;developmental processes;other biological processes	cytosol;translational apparatus;nucleus;other cell component	nucleic acid binding activity;other molecular function	Pf02020, Pf02847, Pf02854	1981	ENSG00000114867	EIF4G1	D3DNT2; D3DNT4; D3DNT5; E9PFM1; G5E9S1; hsa:1981; O43177; O95066; Q04637; Q5HYG0; Q6ZN21; Q8N102	Regulation of expression of SLITs and ROBOs; L13a-mediated translational silencing of Ceruloplasmin expression; Translation initiation complex formation; Ribosomal scanning and start codon recognition; GTP hydrolysis and joining of the 60S ribosomal subunit; Nonsense Mediated Decay (NMD) enhanced by the Exon Junction Complex (EJC); Nonsense Mediated Decay (NMD) independent of the Exon Junction Co…
P42224	Signal transducer and activator of transcription 1-alpha/beta [OS=Homo sapiens]	0.001	7.056	5	3	3	3	750	87.3	6.05	4.99	3	cell cycle OR cell proliferation;RNA metabolism OR transcription;stress response;developmental processes;signal transduction;other biological processes	cytosol;nucleus;other cell component	signal transduction activity or receptor binding;nucleic acid binding activity;other molecular function	Pf00017, Pf01017, Pf02864, Pf02865, Pf12162	6772	ENSG00000115415	STAT1	A8K989; B2RCA0; D2KFR8; D3DPI7; hsa:6772; P42224; Q53S88; Q53XW4; Q68D00; Q9UDL5	Regulation of RUNX2 expression and activity; ISG15 antiviral mechanism; SARS-CoV-2 activates/modulates innate and adaptive immune responses; Signaling by SCF-KIT; Downstream signal transduction; Signaling by phosphorylated juxtamembrane, extracellular and kinase domain KIT mutants; Signaling by PDGFRA transmembrane, juxtamembrane and kinase domain mutants; Signaling by PDGFRA extracellular domain…
P09936	Ubiquitin carboxyl-terminal hydrolase isozyme L1 [OS=Homo sapiens]	0	8.653	15	3	5	3	223	24.8	5.48	10.17	3	cell cycle OR cell proliferation;cell organization and biogenesis;protein metabolism;other metabolic processes;stress response;transport;developmental processes;other biological processes	other membranes;cytosol;ER/Golgi;nucleus;other cell component	signal transduction activity or receptor binding;other molecular function	Pf01088	7345	ENSG00000154277	UCHL1	hsa:7345; P09936; Q4W5K6; Q71UM0	UCH proteinases
Q8IUD2	ELKS/Rab6-interacting/CAST family member 1 [OS=Homo sapiens]	0.002	4.298	1	1	1	1	1116	128	5.97	3.52	1	cell-cell signaling;cell organization and biogenesis;protein metabolism;other metabolic processes;transport;signal transduction;other biological processes	plasma membrane;other membranes;cytosol;cytoskeleton;ER/Golgi;other cell component	other molecular function	Pf09457, Pf10174	23085	ENSG00000082805	ERC1	A2RU77; A7E295; D3DUP7; D3DUP8; hsa:23085; Q6NVK2; Q8IUD2; Q8IUD3; Q8IUD4; Q8IUD5; Q8NAS1; Q9NXN5; Q9UIK7; Q9UPS1
P22004	Bone morphogenetic protein 6 [OS=Homo sapiens]	0.002	3.565	2	1	1	1	513	57.2	8.1	2.59	1	stress response;developmental processes;signal transduction;other biological processes	non-structural extracellular;other cell component	signal transduction activity or receptor binding;other molecular function	Pf00019, Pf00688	654	ENSG00000153162	BMP6	hsa:654; P22004; Q5TCP3
Q16629	Serine/arginine-rich splicing factor 7 [OS=Homo sapiens]	0.002	3.83	9	1	2	1	238	27.4	11.82	7.74	1	RNA metabolism OR transcription;other metabolic processes;transport;other biological processes	nucleus;other cell component	other molecular function	Pf00076	6432	ENSG00000115875	SRSF7	B4DLU6; G5E9M3; hsa:6432; Q16629; Q564D3	Transport of Mature mRNA derived from an Intron-Containing Transcript; mRNA 3'-end processing; RNA Polymerase II Transcription Termination; mRNA Splicing - Major Pathway; mRNA Splicing - Minor Pathway
Q8NFW8	N-acylneuraminate cytidylyltransferase [OS=Homo sapiens]	0.002	3.121	3	1	1	1	434	48.3	7.93	2.44	1	other metabolic processes	nucleus	other molecular function	Pf02348	55907	ENSG00000111726	CMAS	hsa:55907; Q8NFW8; Q96AX5; Q9NQZ0	Sialic acid metabolism
P09972	Fructose-bisphosphate aldolase C [OS=Homo sapiens]	0	51.084	30	9	33	4	364	39.4	6.87	134.88	9	other metabolic processes;other biological processes	non-structural extracellular;cytosol;cytoskeleton;other cell component	cytoskeletal activity;other molecular function	Pf00274	230	ENSG00000109107	ALDOC	B2R5R3; hsa:230; P09972; Q3SYL3; Q6FH94; Q6P0L5	Neutrophil degranulation; Glycolysis; Gluconeogenesis
Q12765	Secernin-1 [OS=Homo sapiens]	0.002	4.001	3	1	3	1	414	46.4	4.75	9.25	1	protein metabolism;transport;other biological processes	other membranes;nucleus;other cell component	other molecular function	Pf03577	9805	ENSG00000136193	SCRN1	A8K0E9; B4DHM0; B4DIP5; C9JPG0; hsa:9805; Q12765; Q25QX7; Q8IWD1
Q9NT62	Ubiquitin-like-conjugating enzyme ATG3 [OS=Homo sapiens]	0.001	4.558	4	1	1	1	314	35.8	4.74	3.44	1	cell organization and biogenesis;protein metabolism;other metabolic processes;transport;other biological processes	cytosol;other cell component	other molecular function	Pf03987	64422	ENSG00000144848	ATG3	hsa:64422; Q6PKC5; Q9H6L9; Q9NT62	Macroautophagy
P67870	Casein kinase II subunit beta [OS=Homo sapiens]	0.001	6.639	9	2	4	2	215	24.9	5.55	12.75	2	cell-cell signaling;cell organization and biogenesis;protein metabolism;other metabolic processes;developmental processes;signal transduction;other biological processes	non-structural extracellular;cytosol;nucleus;other cell component	signal transduction activity or receptor binding;enzyme regulator activity;kinase activity;other molecular function	Pf01214	1460	ENSG00000204435; ENSG00000206406; ENSG00000224398; ENSG00000224774; ENSG00000228875; ENSG00000230700; ENSG00000232960	CSNK2B	B0UXA9; hsa:1460; P07312; P13862; P67870; Q4VX47	Regulation of PTEN stability and activity; KEAP1-NFE2L2 pathway; Neutrophil degranulation; Condensation of Prometaphase Chromosomes; Regulation of TP53 Activity through Phosphorylation; RUNX1 interacts with co-factors whose precise effect on RUNX1 targets is not known; Cooperation of PDCL (PhLP1) and TRiC/CCT in G-protein beta folding; WNT mediated activation of DVL; Signal transduction by L1; Re…
P38159	RNA-binding motif protein, X chromosome [OS=Homo sapiens]	0	10.067	9	3	3	3	391	42.3	10.05	10.03	3	cell organization and biogenesis;protein metabolism;RNA metabolism OR transcription;other metabolic processes;other biological processes	non-structural extracellular;nucleus;other cell component	nucleic acid binding activity;other molecular function	Pf00076, Pf08081	27316	ENSG00000147274	RBMX	B4E3U4; D3DWH0; E9PG86; hsa:27316; P38159; Q5JQ67; Q8N8Y7; Q969R3	mRNA Splicing - Major Pathway; Processing of Capped Intron-Containing Pre-mRNA; RND2 GTPase cycle; RND3 GTPase cycle; RND1 GTPase cycle; RHOBTB2 GTPase cycle; RHOBTB1 GTPase cycle
P18085	ADP-ribosylation factor 4 [OS=Homo sapiens]	0.002	3.705	6	1	1	1	180	20.5	7.14	2.94	1	cell organization and biogenesis;transport;developmental processes;other biological processes	plasma membrane;other membranes;cytosol;ER/Golgi;other cell component	signal transduction activity or receptor binding;enzyme regulator activity;other molecular function	Pf00025	378	ENSG00000168374	ARF4	B2R7J7; hsa:378; P18085; P21371	COPI-mediated anterograde transport; COPI-dependent Golgi-to-ER retrograde traffic; VxPx cargo-targeting to cilium
P52292	Importin subunit alpha-1 [OS=Homo sapiens]	0.003	2.997	2	1	2	1	529	57.8	5.4	5.46	1	DNA metabolism;other metabolic processes;transport;other biological processes	other membranes;cytosol;ER/Golgi;nucleus;other cell component	other molecular function	Pf00514, Pf01749, Pf16186	3838	ENSG00000182481	KPNA2	B9EJD6; hsa:3838; P52292; Q53YE3; Q6NVW7; Q9BRU5	ISG15 antiviral mechanism; NS1 Mediated Effects on Host Pathways; SARS-CoV-2 activates/modulates innate and adaptive immune responses; Estrogen-dependent gene expression; SARS-CoV-1 activates/modulates innate immune responses; Sensing of DNA Double Strand Breaks; CaMK IV-mediated phosphorylation of CREB; CREB1 phosphorylation through the activation of CaMKII/CaMKK/CaMKIV cascasde
O00422	Histone deacetylase complex subunit SAP18 [OS=Homo sapiens]	0.002	4.303	8	1	2	1	153	17.6	9.35	7.87	1	RNA metabolism OR transcription;other metabolic processes;other biological processes	cytosol;nucleus;other cell component	other molecular function	Pf06487	10284	ENSG00000150459	SAP18	B2R494; hsa:10284; O00422; Q2TTR4; Q6IAW9; Q8N606; Q9UF14; X6RAL5	Potential therapeutics for SARS; HDACs deacetylate histones; NoRC negatively regulates rRNA expression; mRNA Splicing - Major Pathway
Q15370	Elongin-B [OS=Homo sapiens]	0.004	2.754	7	1	1	1	118	13.1	4.88	2.93	1	cell organization and biogenesis;protein metabolism;RNA metabolism OR transcription;other metabolic processes;other biological processes	cytosol;nucleus;other cell component	other molecular function	Pf00240	6923	ENSG00000103363	ELOB	B7WPD3; hsa:6923; Q15370	Regulation of expression of SLITs and ROBOs; Antigen processing: Ubiquitination & Proteasome degradation; Oxygen-dependent proline hydroxylation of Hypoxia-inducible Factor Alpha; Vif-mediated degradation of APOBEC3G; Neddylation; Inactivation of CSF3 (G-CSF) signaling; Formation of RNA Pol II elongation complex ; Formation of HIV elongation complex in the absence of HIV Tat; Formation of HIV-1 e…
Q14393	Growth arrest-specific protein 6 [OS=Homo sapiens]	0	20.367	10	6	9	6	678	74.9	5.69	31.57	6	cell adhesion;cell organization and biogenesis;protein metabolism;other metabolic processes;stress response;transport;developmental processes;signal transduction;other biological processes	non-structural extracellular;ER/Golgi;other cell component	signal transduction activity or receptor binding;enzyme regulator activity;other molecular function	Pf00054, Pf00594, Pf02210, Pf07645, Pf12662	2621	ENSG00000183087	GAS6	B3KRQ7; B3KVL4; E9PBL7; hsa:2621; Q14393; Q6IMN1; Q7Z7N3	Regulation of Insulin-like Growth Factor (IGF) transport and uptake by Insulin-like Growth Factor Binding Proteins (IGFBPs); Post-translational protein phosphorylation; Cell surface interactions at the vascular wall; Platelet degranulation ; Gamma-carboxylation of protein precursors; Transport of gamma-carboxylated protein precursors from the endoplasmic reticulum to the Golgi apparatus; Removal …
Q969G3	SWI/SNF-related matrix-associated actin-dependent regulator of chromatin subfamily E member 1 [OS=Homo sapiens]	0.001	5.745	6	2	4	2	411	46.6	4.88	9.36	2	cell organization and biogenesis;RNA metabolism OR transcription;developmental processes;other biological processes	nucleus;other cell component	nucleic acid binding activity;other molecular function	Pf00505	6605	ENSG00000073584	SMARCE1	B3KMC1; B4DFR4; C0IMW4; C0IMW5; C0IMW7; H7C3F6; hsa:6605; O43539; Q969G3	RUNX1 interacts with co-factors whose precise effect on RUNX1 targets is not known; RMTs methylate histone arginines
Q9UI12	V-type proton ATPase subunit H [OS=Homo sapiens]	0.001	6.429	6	2	3	2	483	55.8	6.48	9.95	2	cell organization and biogenesis;transport;other biological processes	plasma membrane;other membranes;cytosol;other cytoplasmic organelle;other cell component	transporter activity;enzyme regulator activity	Pf03224, Pf11698	51606	ENSG00000047249	ATP6V1H	B3KMR0; hsa:51606; Q6PK44; Q9H3E3; Q9UI12; Q9Y300	Nef Mediated CD4 Down-regulation; Amino acids regulate mTORC1; ROS and RNS production in phagocytes; Insulin receptor recycling; Transferrin endocytosis and recycling; Ion channel transport; Nef Mediated CD8 Down-regulation; Blockage of phagosome acidification
Q5JWF2	Guanine nucleotide-binding protein G(s) subunit alpha isoforms XLas [OS=Homo sapiens]	0	7.75	4	3	4	3	1037	111	5.03	9.75	3	cell adhesion;stress response;developmental processes;signal transduction;other biological processes	plasma membrane;other membranes;cytosol	signal transduction activity or receptor binding;enzyme regulator activity;other molecular function	Pf00503	2778	ENSG00000087460	GNAS	A2A2S3; E1P5G3; O75684; O75685; Q5JW67; Q5JWF1; Q5JWF2; Q9NY42	G alpha (i) signalling events; G alpha (z) signalling events; GPER1 signaling; ADORA2B mediated anti-inflammatory cytokines production; Glucagon-like Peptide-1 (GLP1) regulates insulin secretion; Prostacyclin signalling through prostacyclin receptor; Glucagon-type ligand receptors; Vasopressin regulates renal water homeostasis via Aquaporins; PKA activation in glucagon signalling; Hedgehog 'off' …
P16435	NADPH--cytochrome P450 reductase [OS=Homo sapiens]	0.002	3.847	2	1	2	1	677	76.6	5.58	6.49	1	protein metabolism;other metabolic processes;other biological processes	other membranes;cytosol;mitochondrion;ER/Golgi;other cell component	other molecular function	Pf00175, Pf00258, Pf00667	5447	ENSG00000127948	POR	P16435; Q16455; Q197M5; Q8N181; Q9H3M8; Q9UDT3	Cytochrome P450 - arranged by substrate type
P19174	1-phosphatidylinositol 4,5-bisphosphate phosphodiesterase gamma-1 [OS=Homo sapiens]	0.001	4.694	2	2	3	2	1290	148.4	6.05	2.72	2	other metabolic processes;developmental processes;signal transduction;other biological processes	plasma membrane;other membranes;cytosol;nucleus;other cell component	signal transduction activity or receptor binding;other molecular function	Pf00017, Pf00018, Pf00168, Pf00387, Pf00388	5335	ENSG00000124181	PLCG1	B7ZLY7; B9EGH4; E1P5W4; hsa:5335; P19174; Q2V575	ISG15 antiviral mechanism; Role of phospholipids in phagocytosis; FCERI mediated MAPK activation; FCERI mediated Ca+2 mobilization; FCGR3A-mediated IL10 synthesis; Generation of second messenger molecules; Signaling by ALK fusions and activated point mutants; RET signaling; Downstream signal transduction; Signaling by ALK; DAP12 signaling; Signaling by ERBB2 KD Mutants; Signaling by ERBB2 TMD/JMD…
Q15369	Elongin-C [OS=Homo sapiens]	0.006	2.516	8	1	2	1	112	12.5	4.78	6.78	1	protein metabolism;RNA metabolism OR transcription;other metabolic processes;other biological processes	cytosol;nucleus;other cell component	other molecular function	Pf03931	6921	ENSG00000154582	ELOC	E5RGD9; hsa:6921; Q15369; Q567Q6	Antigen processing: Ubiquitination & Proteasome degradation; Oxygen-dependent proline hydroxylation of Hypoxia-inducible Factor Alpha; Vif-mediated degradation of APOBEC3G; Neddylation; Regulation of expression of SLITs and ROBOs; Formation of RNA Pol II elongation complex ; Formation of HIV elongation complex in the absence of HIV Tat; Formation of HIV-1 elongation complex containing HIV-1 Tat; …
Q9UHD9	Ubiquilin-2 [OS=Homo sapiens]	0.001	4.511	3	1	1	1	624	65.7	5.22	5.82	1	cell organization and biogenesis;protein metabolism;other metabolic processes;stress response;other biological processes	plasma membrane;other membranes;cytosol;nucleus;other cytoplasmic organelle;other cell component	other molecular function	Pf00240, Pf00627	29978	ENSG00000188021	UBQLN2	hsa:29978; O94798; Q5D027; Q9H3W6; Q9HAZ4; Q9UHD9	Cargo recognition for clathrin-mediated endocytosis
Q8N668	COMM domain-containing protein 1 [OS=Homo sapiens]	0.002	4.109	8	1	1	1	190	21.2	6.2	3.23	1	DNA metabolism;other metabolic processes;stress response;transport;other biological processes	other membranes;cytosol;nucleus;other cytoplasmic organelle;other cell component	other molecular function	Pf07258, Pf17221	150684	ENSG00000173163	COMMD1	B4DFQ4; hsa:150684; Q8N668; Q96GS0	Neddylation
P53004	Biliverdin reductase A [OS=Homo sapiens]	0.001	4.486	5	1	1	1	296	33.4	6.44	3.48	1	other metabolic processes	cytosol	other molecular function	Pf01408, Pf09166	644	ENSG00000106605	BLVRA	A8K747; hsa:644; O95019; P53004; Q86UX0; Q96QL4; Q9BRW8	Cytoprotection by HMOX1; Heme degradation
Q6PCB0	von Willebrand factor A domain-containing protein 1 [OS=Homo sapiens]	0.001	6.301	10	2	2	2	445	46.8	7.68	5.85	2	cell organization and biogenesis;stress response	extracellular matrix;ER/Golgi	other molecular function	Pf00041, Pf00092	64856	ENSG00000179403	VWA1	A8K692; B3KUA1; E9PB53; hsa:64856; Q6PCB0; Q7L5D7; Q9H6J5	Regulation of Insulin-like Growth Factor (IGF) transport and uptake by Insulin-like Growth Factor Binding Proteins (IGFBPs); Post-translational protein phosphorylation
Q8IZF2	Adhesion G protein-coupled receptor F5 [OS=Homo sapiens]	0.001	7.559	3	3	5	3	1346	149.4	6.65	9.73	3	other metabolic processes;developmental processes;signal transduction;other biological processes	plasma membrane;other membranes;other cell component	other molecular function	Pf00002, Pf01390, Pf01825, Pf13927	221395	ENSG00000069122	ADGRF5	hsa:221395; O94858; Q5TF06; Q6RGN2; Q86SP0; Q8IZF2; Q9Y3Z2	Surfactant metabolism
P21266	Glutathione S-transferase Mu 3 [OS=Homo sapiens]	0	8.426	12	3	6	3	225	26.5	5.54	17.02	3	other metabolic processes;stress response;developmental processes;other biological processes	cytosol;cytoskeleton;other cell component	other molecular function	Pf00043, Pf02798	2947	ENSG00000134202	GSTM3	hsa:2947; O60550; P21266; Q96HA3	Glutathione conjugation
P22102	Trifunctional purine biosynthetic protein adenosine-3 [OS=Homo sapiens]	0.001	4.443	2	2	4	2	1010	107.7	6.7	8.74	2	other metabolic processes;developmental processes;other biological processes	cytosol	other molecular function	Pf00551, Pf00586, Pf01071, Pf02769, Pf02843, Pf02844	2618	ENSG00000159131; ENSG00000262473	GART	A8K945; A8KA32; D3DSF3; D3DSF4; hsa:2618; O14659; P22102; Q52M77	Purine ribonucleoside monophosphate biosynthesis
Q99570	Phosphoinositide 3-kinase regulatory subunit 4 [OS=Homo sapiens]	0.001	5.305	2	3	5	3	1358	153	7.17	8.03	3	cell organization and biogenesis;protein metabolism;other metabolic processes;stress response;transport;other biological processes	other membranes;cytosol;cytoskeleton;other cytoplasmic organelle;other cell component	kinase activity;other molecular function	Pf00069, Pf00400	30849	ENSG00000196455	PIK3R4	hsa:30849; Q2TBF4; Q99570	SARS-CoV-2 activates/modulates innate and adaptive immune responses; Antigen Presentation: Folding, assembly and peptide loading of class I MHC; Synthesis of PIPs at the Golgi membrane; Synthesis of PIPs at the early endosome membrane; Synthesis of PIPs at the late endosome membrane; PI3K Cascade; Macroautophagy; Translation of Replicase and Assembly of the Replication Transcription Complex; Tran…
Q9UHB9	Signal recognition particle subunit SRP68 [OS=Homo sapiens]	0.002	3.702	2	1	2	1	627	70.7	8.56	6.02	1	transport;other biological processes	cytosol;ER/Golgi;translational apparatus;nucleus;other cell component	nucleic acid binding activity;other molecular function	Pf16969	6730	ENSG00000167881	SRP68	B3KUU5; B3KWY7; G3V1U4; hsa:6730; Q8NCJ4; Q8WUK2; Q9UHB9	SRP-dependent cotranslational protein targeting to membrane
O15294	UDP-N-acetylglucosamine--peptide N-acetylglucosaminyltransferase 110 kDa subunit [OS=Homo sapiens]	0.005	2.574	1	1	1	1	1046	116.9	6.7	2.12	1	cell organization and biogenesis;protein metabolism;other metabolic processes;signal transduction;other biological processes	plasma membrane;other membranes;cytosol;mitochondrion;nucleus;other cell component	nucleic acid binding activity;other molecular function	Pf00515, Pf13181, Pf13414, Pf13424, Pf13844	8473	ENSG00000147162	OGT	hsa:8473; O15294; Q7Z3K0; Q8WWM8; Q96CC1; Q9UG57	UCH proteinases; Regulation of necroptotic cell death; HATs acetylate histones
Q14146	Unhealthy ribosome biogenesis protein 2 homolog [OS=Homo sapiens]	0.008	2.34	0	1	1	1	1524	170.4	7.31	2.82	1	other biological processes	nucleus;other cell component		Pf10441	9816	ENSG00000135763	URB2	hsa:9816; Q14146; Q5VYC9
O43493	Trans-Golgi network integral membrane protein 2 [OS=Homo sapiens]	0.003	2.842	2	1	2	1	437	45.9	5.63	4.62	1		plasma membrane;other membranes;ER/Golgi;nucleus;other cytoplasmic organelle		Pf17818	10618	ENSG00000152291	TGOLN2	B2R686; B8ZZ88; D6W5K3; F8W8W7; F8WBK2; hsa:10618; J3KQ45; O15282; O43492; O43493; O43499; O43500; O43501; Q53G68; Q53GV2; Q6MZV1; Q6ZTM7; Q8N6T8; Q92760; Q96QL2	Cargo recognition for clathrin-mediated endocytosis; Golgi Associated Vesicle Biogenesis; Regulation of Insulin-like Growth Factor (IGF) transport and uptake by Insulin-like Growth Factor Binding Proteins (IGFBPs); Post-translational protein phosphorylation; Retrograde transport at the Trans-Golgi-Network
Q15599	Na(+)/H(+) exchange regulatory cofactor NHE-RF2 [OS=Homo sapiens]	0.002	4.327	8	2	2	2	337	37.4	7.93	3.13	2	cell organization and biogenesis;other biological processes	plasma membrane;other membranes;nucleus;other cell component	signal transduction activity or receptor binding;other molecular function	Pf00595, Pf09007	9351	ENSG00000065054	NHERF2	D3DU84; D3DU85; H3BSV6; hsa:9351; O00272; O00556; Q15599; Q3KQY7
Q92925	SWI/SNF-related matrix-associated actin-dependent regulator of chromatin subfamily D member 2 [OS=Homo sapiens]	0.002	4.262	3	1	1	1	531	58.9	9.64	3.35	1	cell organization and biogenesis;RNA metabolism OR transcription;other biological processes	nucleus;other cell component	other molecular function	Pf02201	6603	ENSG00000108604	SMARCD2	A5PLL5; A6NNQ7; B4DV56; B4E1R6; hsa:6603; Q7L2I6; Q92925; Q9UHZ1	RUNX1 interacts with co-factors whose precise effect on RUNX1 targets is not known; RMTs methylate histone arginines
P40926	Malate dehydrogenase, mitochondrial [OS=Homo sapiens]	0	17.219	16	5	13	5	338	35.5	8.68	38.93	5	other metabolic processes	other membranes;mitochondrion;other cell component	other molecular function	Pf00056, Pf02866	4191	ENSG00000146701	MDH2	A8K414; B2RE78; B4DE44; E9PDB2; hsa:4191; O43682; P40926	Gluconeogenesis; Citric acid cycle (TCA cycle)
Q9NRX5	Serine incorporator 1 [OS=Homo sapiens]	0	8.07	7	3	4	3	453	50.5	5.85	8.06	3	other metabolic processes;other biological processes	plasma membrane;other membranes;ER/Golgi	other molecular function	Pf03348	57515	ENSG00000111897	SERINC1	B3KY69; E1P565; hsa:57515; O75655; Q7Z2F5; Q8TAG1; Q9NRX5; Q9NTH8; Q9ULG7	Serine biosynthesis
P63172	Dynein light chain Tctex-type 1 [OS=Homo sapiens]	0.001	6.276	14	1	4	1	113	12.4	5.08	22.32	1	cell cycle OR cell proliferation;cell organization and biogenesis;transport;developmental processes;other biological processes	non-structural extracellular;cytoskeleton;ER/Golgi;other cell component	other molecular function	Pf03645	6993	ENSG00000146425	DYNLT1	hsa:6993; P63172; Q15763; Q5VTU4	Neutrophil degranulation
Q92888	Rho guanine nucleotide exchange factor 1 [OS=Homo sapiens]	0.002	3.798	3	2	2	2	912	102.4	5.66	2.53	2	signal transduction;other biological processes	plasma membrane;other membranes;cytosol;other cell component	signal transduction activity or receptor binding;enzyme regulator activity	Pf00621, Pf09128, Pf17838	9138	ENSG00000076928	ARHGEF1	hsa:9138; O00513; Q6NX52; Q8N4J4; Q92888; Q96BF4; Q96F17; Q9BSB1	RHOC GTPase cycle; RHOA GTPase cycle; RHOB GTPase cycle; NRAGE signals death through JNK; G alpha (12/13) signalling events
Q9UKK3	Protein mono-ADP-ribosyltransferase PARP4 [OS=Homo sapiens]	0	13.052	3	4	4	4	1724	192.5	5.66	9.46	4	protein metabolism;DNA metabolism;other metabolic processes;stress response;other biological processes	cytosol;cytoskeleton;nucleus;other cell component	nucleic acid binding activity;other molecular function	Pf00092, Pf00533, Pf00644, Pf08487	143	ENSG00000102699	PARP4	hsa:143; O75903; Q14682; Q5QNZ9; Q9H1M6; Q9UKK3	Maturation of nucleoprotein; Nicotinamide salvaging; Maturation of nucleoprotein
Q9H6N6	Putative uncharacterized protein MYH16 [OS=Homo sapiens]	0.004	2.773	1	1	2	1	1097	128.2	5.49	5.81	1		cytoskeleton		Pf01576			MYH16	Q9H6N6
Q8N2Q7	Neuroligin-1 [OS=Homo sapiens]	0.002	4.33	1	1	1	1	863	96.3	6.39	3.28	1	cell adhesion;cell-cell signaling;cell organization and biogenesis;transport;developmental processes;signal transduction;other biological processes	non-structural extracellular;plasma membrane;other membranes;ER/Golgi;other cell component	signal transduction activity or receptor binding;other molecular function	Pf00135	22871	ENSG00000169760	NLGN1	D2X2H5; hsa:22871; Q8N2Q7; Q9UPT2	Neurexins and neuroligins
Q93009	Ubiquitin carboxyl-terminal hydrolase 7 [OS=Homo sapiens]	0.004	2.828	1	1	1	1	1102	128.2	5.55	3.7	1	cell organization and biogenesis;protein metabolism;DNA metabolism;other metabolic processes;stress response;other biological processes	cytosol;nucleus;other cell component	other molecular function	Pf00443, Pf00917, Pf12436, Pf14533	7874	ENSG00000187555	USP7	A6NMY8; B7Z815; H0Y3G8; hsa:7874; Q93009	Ub-specific processing proteases; Synthesis of active ubiquitin: roles of E1 and E2 enzymes; Regulation of TP53 Degradation; Formation of TC-NER Pre-Incision Complex; Dual incision in TC-NER; Gap-filling DNA repair synthesis and ligation in TC-NER; Regulation of PTEN localization
Q32P44	Echinoderm microtubule-associated protein-like 3 [OS=Homo sapiens]	0	9.252	3	2	2	2	896	95.1	7.12	7.16	2	cell cycle OR cell proliferation;cell organization and biogenesis;other biological processes	cytoskeleton;nucleus;other cell component	cytoskeletal activity;other molecular function	Pf00400, Pf03451	256364	ENSG00000149499	EML3	hsa:256364; Q32P44; Q6ZQW7; Q8NA55
Q9ULV4	Coronin-1C [OS=Homo sapiens]	0.001	7.311	5	3	6	3	474	53.2	7.08	11.72	3	cell organization and biogenesis;transport;developmental processes;signal transduction;other biological processes	plasma membrane;other membranes;cytoskeleton;other cytoplasmic organelle;other cell component	cytoskeletal activity;other molecular function	Pf00400, Pf08953, Pf16300	23603	ENSG00000110880	CORO1C	A7MAP0; A7MAP1; B3KU12; hsa:23603; Q9NSK5; Q9ULV4
Q5ZPR3	CD276 antigen [OS=Homo sapiens]	0.001	4.582	3	1	1	1	534	57.2	4.91	4.96	1	signal transduction;other biological processes	plasma membrane;other membranes	signal transduction activity or receptor binding	Pf07686, Pf13927	80381	ENSG00000103855	CD276	hsa:80381; Q5ZPR3; Q6P5Y4; Q6UXI2; Q8NBI8; Q8NC34; Q8NCB6; Q9BXR1
P55263	Adenosine kinase [OS=Homo sapiens]	0.002	3.879	6	2	5	2	362	40.5	6.7	12.9	2	other metabolic processes	plasma membrane;other membranes;cytosol;nucleus	kinase activity;other molecular function	Pf00294	132	ENSG00000156110	ADK	B7Z783; B7Z800; hsa:132; O00741; O00742; P55263; Q16710; Q5JQ10; Q5JQ11; Q9BTN2	Ribavirin ADME; Purine salvage
P05452	Tetranectin [OS=Homo sapiens]	0.002	4.126	10	1	2	1	202	22.5	5.67	8.34	1	other biological processes	non-structural extracellular;nucleus;other cell component	other molecular function	Pf00059	7123	ENSG00000163815	CLEC3B	hsa:7123; P05452; Q6FGX6	Platelet degranulation
Q8N7H5	RNA polymerase II-associated factor 1 homolog [OS=Homo sapiens]	0	8.359	6	2	4	2	531	59.9	4.63	11.87	2	cell-cell signaling;protein metabolism;RNA metabolism OR transcription;other metabolic processes;developmental processes;signal transduction;other biological processes	other membranes;nucleus;other cell component	other molecular function	Pf03985	54623	ENSG00000006712	PAF1	hsa:54623; M0QX35; O75239; Q8N7H5; Q9H166; Q9NUU9	E3 ubiquitin ligases ubiquitinate target proteins; Formation of RNA Pol II elongation complex ; RNA Polymerase II Pre-transcription Events
Q15276	Rab GTPase-binding effector protein 1 [OS=Homo sapiens]	0.001	5.429	2	2	2	2	862	99.2	5.01	4.09	2	cell organization and biogenesis;transport;signal transduction;other biological processes	other membranes;other cytoplasmic organelle;other cell component	signal transduction activity or receptor binding;enzyme regulator activity;other molecular function	Pf03528, Pf09311	9135	ENSG00000029725	RABEP1	B2RAG7; hsa:9135; O95369; Q15276; Q8IVX3	TBC/RABGAPs
Q9H9H4	Vacuolar protein sorting-associated protein 37B [OS=Homo sapiens]	0.002	4.003	6	1	1	1	285	31.3	7.34	4.26	1	cell organization and biogenesis;protein metabolism;other metabolic processes;transport;other biological processes	plasma membrane;other membranes;other cytoplasmic organelle;other cell component	other molecular function	Pf07200	79720	ENSG00000139722	VPS37B	hsa:79720; Q9H9H4	Late endosomal microautophagy; HCMV Late Events; Budding and maturation of HIV virion; Membrane binding and targetting of GAG proteins; Endosomal Sorting Complex Required For Transport (ESCRT)
Q6NY19	KN motif and ankyrin repeat domain-containing protein 3 [OS=Homo sapiens]	0	14.276	7	4	4	4	821	85.8	5.02	11.36	4	cell organization and biogenesis	cytoskeleton;other cell component		Pf12075, Pf12796, Pf13857	256949	ENSG00000186994	KANK3	hsa:256949; Q6NY19; Q6NZI1; Q6ZQR3; Q8IUV2
O75947	ATP synthase subunit d, mitochondrial [OS=Homo sapiens]	0.002	3.066	6	1	2	1	161	18.5	5.3	5.57	1	other metabolic processes;transport	other membranes;mitochondrion	transporter activity	Pf05873	10476	ENSG00000167863	ATP5PD	B2R5L6; hsa:10476; O75947; Q9H3J4	Cristae formation; Formation of ATP by chemiosmotic coupling
Q9NQW7	Xaa-Pro aminopeptidase 1 [OS=Homo sapiens]	0	34.532	25	11	17	10	623	69.9	5.67	55.07	11	protein metabolism;other metabolic processes	cytosol;other cell component	other molecular function	Pf00557, Pf01321, Pf16188, Pf16189	7511	ENSG00000108039	XPNPEP1	A8K071; G5E9Y2; G8JLB2; hsa:7511; O15250; Q53EX6; Q8N3Q0; Q96D23; Q9NQW7
Q96CG8	Collagen triple helix repeat-containing protein 1 [OS=Homo sapiens]	0	13.616	16	4	16	4	243	26.2	7.99	47.43	4	cell-cell signaling;cell cycle OR cell proliferation;cell organization and biogenesis;developmental processes;signal transduction;other biological processes	non-structural extracellular;cytosol;other cell component	signal transduction activity or receptor binding;other molecular function		115908	ENSG00000164932	CTHRC1	G3V141; hsa:115908; Q6UW91; Q8IX63; Q96CG8
Q14694	Ubiquitin carboxyl-terminal hydrolase 10 [OS=Homo sapiens]	0.002	3.661	1	1	1	1	798	87.1	5.31	2.9	1	protein metabolism;DNA metabolism;other metabolic processes;stress response;signal transduction;other biological processes	cytosol;cytoskeleton;nucleus;other cytoplasmic organelle;other cell component	other molecular function	Pf00443, Pf07145	9100	ENSG00000103194	USP10	B2RDJ8; B4DS84; hsa:9100; Q14694; Q9BWG7; Q9NSL7	Ub-specific processing proteases; Termination of translesion DNA synthesis
Q86X83	COMM domain-containing protein 2 [OS=Homo sapiens]	0.002	3.506	8	2	3	2	199	22.7	6.73	4.39	2		other cell component		Pf07258	51122	ENSG00000114744	COMMD2	hsa:51122; Q561V4; Q86X83; Q9H3L5; Q9Y5V1	Neddylation
Q04206	Transcription factor p65 [OS=Homo sapiens]	0.002	3.43	3	1	2	1	551	60.2	5.68	2.95	1	cell-cell signaling;cell organization and biogenesis;protein metabolism;RNA metabolism OR transcription;other metabolic processes;stress response;developmental processes;signal transduction;other biological processes	cytosol;nucleus;other cell component	cytoskeletal activity;nucleic acid binding activity;other molecular function	Pf00554, Pf16179	5970	ENSG00000173039	RELA	hsa:5970; Q04206; Q6GTV1; Q6SLK1	FCERI mediated NF-kB activation; Downstream TCR signaling; Activation of NF-kappaB in B cells; Dectin-1 mediated noncanonical NF-kB signaling; Transcriptional regulation of white adipocyte differentiation; Senescence-Associated Secretory Phenotype (SASP); Transcriptional Regulation by VENTX; PKMTs methylate histone lysines; RIP-mediated NFkB activation via ZBP1; NF-kB is activated and signals sur…
P21796	Voltage-dependent anion-selective channel protein 1 [OS=Homo sapiens]	0	8.873	10	3	4	3	283	30.8	8.54	11.51	3	cell-cell signaling;other metabolic processes;stress response;transport;other biological processes	plasma membrane;other membranes;mitochondrion;other cell component	transporter activity;other molecular function	Pf01459	7416	ENSG00000213585	VDAC1	B3KVK4; D3DQ93; hsa:7416; P21796; Q5FVE7; Q9UIQ5; Q9UPL0	Ub-specific processing proteases; Pyruvate metabolism; Mitochondrial protein import; PINK1-PRKN Mediated Mitophagy; Mitochondrial calcium ion transport
P31943	Heterogeneous nuclear ribonucleoprotein H [OS=Homo sapiens]	0	16	18	6	12	5	449	49.2	6.3	35.62	6	RNA metabolism OR transcription;other metabolic processes;other biological processes	cytosol;nucleus;other cell component	nucleic acid binding activity;other molecular function	Pf00076, Pf08080	3187	ENSG00000169045; ENSG00000284254	HNRNPH1	B3KW86; D3DWQ2; hsa:3187; P31943; Q6IBM4	mRNA Splicing - Major Pathway; FGFR2 alternative splicing; Processing of Capped Intron-Containing Pre-mRNA
P10619	Lysosomal protective protein [OS=Homo sapiens]	0	25.622	15	7	13	7	480	54.4	6.61	44.89	7	protein metabolism;transport;other biological processes	non-structural extracellular;ER/Golgi;other cytoplasmic organelle;other cell component	enzyme regulator activity;other molecular function	Pf00450	5476	ENSG00000064601	CTSA	B2R798; hsa:5476; P10619; Q561W6; Q5JZH1; Q96KJ2; Q9BR08; Q9BW68	Neutrophil degranulation; MHC class II antigen presentation; Glycosphingolipid metabolism; Sialic acid metabolism; Defective NEU1 causes sialidosis
Q14789	Golgin subfamily B member 1 [OS=Homo sapiens]	0.002	3.898	0	1	1	1	3259	375.8	5	3.19	1	cell organization and biogenesis;other biological processes	other membranes;cytosol;ER/Golgi	nucleic acid binding activity		2804	ENSG00000173230	GOLGB1	B2ZZ91; D3DN92; E7EP74; F1T0J2; hsa:2804; Q14398; Q14789	Golgi Associated Vesicle Biogenesis; COPI-mediated anterograde transport; Signaling by FLT3 fusion proteins
P17096	High mobility group protein HMG-I/HMG-Y [OS=Homo sapiens]	0.001	6.327	25	2	3	2	107	11.7	10.32	8.43	2	cell organization and biogenesis;DNA metabolism;RNA metabolism OR transcription;other metabolic processes;stress response;other biological processes	cytosol;nucleus;other cell component	signal transduction activity or receptor binding;nucleic acid binding activity;other molecular function		3159	ENSG00000137309	HMGA1	hsa:3159; P10910; P17096; Q5T6U9; Q9UKB0	Vpr-mediated nuclear import of PICs; 2-LTR circle formation; Integration of viral DNA into host genomic DNA; Autointegration results in viral DNA circles; APOBEC3G mediated resistance to HIV-1 infection; Formation of Senescence-Associated Heterochromatin Foci (SAHF)
P0CG39	POTE ankyrin domain family member J [OS=Homo sapiens]	0	38.243	9	9	107	2	1038	117.3	5.97	313.75	9				Pf00022, Pf12796, Pf14915	653781	ENSG00000222038	POTEJ	hsa:653781; P0CG39
Q16204	Coiled-coil domain-containing protein 6 [OS=Homo sapiens]	0.001	6.684	4	2	2	2	474	53.3	7.34	5.99	2	cell organization and biogenesis	cytosol;cytoskeleton	cytoskeletal activity;other molecular function	Pf09755	8030	ENSG00000108091	CCDC6	hsa:8030; Q15250; Q16204; Q6GSG7
P20810	Calpastatin [OS=Homo sapiens]	0	12.812	9	3	4	3	708	76.5	5.07	15.45	3	cell organization and biogenesis;other biological processes	other membranes;cytosol;ER/Golgi;other cell component	enzyme regulator activity	Pf00748	831	ENSG00000153113	CAST	B7Z468; G5E946; G5E9D3; hsa:831; O95360; P20810; Q05DE8; Q7Z4K0; Q96D08; Q9H1Z5	Degradation of the extracellular matrix; Deregulated CDK5 triggers multiple neurodegenerative pathways in Alzheimer's disease models
Q8IV08	5'-3' exonuclease PLD3 [OS=Homo sapiens]	0.001	4.578	6	3	3	3	490	54.7	6.47	2.08	3	DNA metabolism;stress response;other biological processes	other membranes;ER/Golgi;other cytoplasmic organelle	other molecular function	Pf13918	23646	ENSG00000105223	PLD3	hsa:23646; Q8IV08; Q92853; Q9BW87	Role of phospholipids in phagocytosis; Synthesis of PG
Q6IN85	Serine/threonine-protein phosphatase 4 regulatory subunit 3A [OS=Homo sapiens]	0.007	2.409	1	1	1	1	833	95.3	4.94	0	1	protein metabolism;other metabolic processes;stress response	cytosol;cytoskeleton;nucleus;other cell component	enzyme regulator activity	Pf04802	55671	ENSG00000100796	PPP4R3A	hsa:55671; Q69YK6; Q6IN85; Q86U23; Q86YI7; Q8IVG1; Q9H3F1; Q9H7U8; Q9NV01; Q9NWP1
O75503	Ceroid-lipofuscinosis neuronal protein 5 [OS=Homo sapiens]	0.001	6.226	5	2	3	2	358	41.5	7.4	9.44	2	cell organization and biogenesis;protein metabolism;other metabolic processes;transport;developmental processes;other biological processes	other membranes;cytosol;ER/Golgi;other cytoplasmic organelle;other cell component	other molecular function	Pf15014	1203	ENSG00000102805	CLN5	B3KQK7; hsa:1203; O75503
Q9UI10	Translation initiation factor eIF-2B subunit delta [OS=Homo sapiens]	0.001	5.951	6	2	2	2	523	57.5	9.38	4.79	2	protein metabolism;other metabolic processes;stress response;developmental processes;signal transduction;other biological processes	cytosol;translational apparatus;other cell component	nucleic acid binding activity;other molecular function	Pf01008	8890	ENSG00000115211	EIF2B4	hsa:8890; Q53RY7; Q5BJF4; Q9BUV9; Q9UBG4; Q9UI10; Q9UIQ9; Q9UJ95	Recycling of eIF2:GDP
Q13596	Sorting nexin-1 [OS=Homo sapiens]	0.002	3.749	2	1	1	1	522	59	5.15	3.48	1	cell organization and biogenesis;transport;other biological processes	other membranes;cytosol;ER/Golgi;other cytoplasmic organelle;other cell component	signal transduction activity or receptor binding;other molecular function	Pf00787, Pf03700, Pf09325	6642	ENSG00000028528	SNX1	A6NM19; A8K6T7; H0Y2M5; hsa:6642; O60750; O60751; Q13596; Q6ZRJ8
O75923	Dysferlin [OS=Homo sapiens]	0	33.784	7	12	16	12	2080	237.1	5.64	39.49	12	cell organization and biogenesis;stress response;transport;other biological processes	plasma membrane;other membranes;cytoskeleton;other cytoplasmic organelle;other cell component	other molecular function	Pf00168, Pf08150, Pf08151, Pf08165, Pf16165	8291	ENSG00000135636	DYSF	A0FK00; B1PZ70; B1PZ71; B1PZ72; B1PZ73; B1PZ74; B1PZ75; B1PZ76; B1PZ77; B1PZ78; B1PZ79; B1PZ80; B1PZ81; B3KQB9; hsa:8291; O75696; O75923; Q09EX5; Q0H395; Q53QY3; Q53TD2; Q8TEL8; Q9UEN7	Smooth Muscle Contraction
Q16762	Thiosulfate sulfurtransferase [OS=Homo sapiens]	0	7.762	10	2	3	2	297	33.4	7.25	13.11	2	other metabolic processes;transport;other biological processes	mitochondrion	nucleic acid binding activity;other molecular function	Pf00581	7263	ENSG00000128311	TST	B3KRM1; hsa:7263; Q16762; Q6IB06	Sulfide oxidation to sulfate
Q15185	Prostaglandin E synthase 3 [OS=Homo sapiens]	0.002	4.336	11	1	2	1	160	18.7	4.54	7.87	1	cell cycle OR cell proliferation;cell organization and biogenesis;DNA metabolism;other metabolic processes;developmental processes;signal transduction;other biological processes	cytosol;nucleus;other cell component	other molecular function	Pf04969	10728	ENSG00000110958	PTGES3	A8K7D0; B4DHP2; B4DP11; B4DP21; hsa:10728; Q15185; Q8WU70	Potential therapeutics for SARS; HSP90 chaperone cycle for steroid hormone receptors (SHR) in the presence of ligand; Estrogen-dependent gene expression; HSF1 activation; Aryl hydrocarbon receptor signalling; Synthesis of Prostaglandins (PG) and Thromboxanes (TX); Attenuation phase
O60216	Double-strand-break repair protein rad21 homolog [OS=Homo sapiens]	0.004	2.661	2	1	1	1	631	71.6	4.65	2.76	1	cell cycle OR cell proliferation;cell organization and biogenesis;DNA metabolism;other metabolic processes;stress response;other biological processes	cytosol;cytoskeleton;nucleus;other cell component	nucleic acid binding activity;other molecular function	Pf04824, Pf04825	5885	ENSG00000164754	RAD21	A8K0E0; hsa:5885; O60216; Q15001; Q99568	Meiotic synapsis; Separation of Sister Chromatids; Resolution of Sister Chromatid Cohesion; SUMOylation of DNA damage response and repair proteins; Estrogen-dependent gene expression; Establishment of Sister Chromatid Cohesion; Cohesin Loading onto Chromatin
P45973	Chromobox protein homolog 5 [OS=Homo sapiens]	0.002	3.319	6	1	1	1	191	22.2	5.86	2.67	1	cell organization and biogenesis;stress response;other biological processes	nucleus;other cell component	other molecular function	Pf00385, Pf01393	23468	ENSG00000094916	CBX5	B2R8T9; hsa:23468; P45973	Factors involved in megakaryocyte development and platelet production; SUMOylation of chromatin organization proteins; Transcriptional Regulation by E2F6
P49589	Cysteine--tRNA ligase, cytoplasmic [OS=Homo sapiens]	0	14.41	7	4	5	4	748	85.4	6.76	17.46	4	protein metabolism;RNA metabolism OR transcription;other metabolic processes	cytosol;other cell component	nucleic acid binding activity;other molecular function	Pf01406	833	ENSG00000110619; ENSG00000278191	CARS1	hsa:833; P49589; Q53XI8; Q5HYE4; Q9HD24; Q9HD25	Cytosolic tRNA aminoacylation; Signaling by ALK fusions and activated point mutants
P31323	cAMP-dependent protein kinase type II-beta regulatory subunit [OS=Homo sapiens]	0	22.006	17	6	8	5	418	46.3	4.92	25.59	6	other metabolic processes;signal transduction;other biological processes	plasma membrane;other membranes;cytosol;cytoskeleton;other cell component	other molecular function	Pf00027, Pf02197	5577	ENSG00000005249; ENSG00000284096	PRKAR2B	A4D0R9; hsa:5577; P31323	FCGR3A-mediated IL10 synthesis; Recruitment of NuMA to mitotic centrosomes; Regulation of PLK1 Activity at G2/M Transition; Loss of Nlp from mitotic centrosomes; Recruitment of mitotic centrosome proteins and complexes; Anchoring of the basal body to the plasma membrane; AURKA Activation by TPX2; GPER1 signaling; ADORA2B mediated anti-inflammatory cytokines production; Factors involved in megakar…
Q9HB71	Calcyclin-binding protein [OS=Homo sapiens]	0.007	2.434	6	2	2	1	228	26.2	8.25	4.43	2	developmental processes;other biological processes	cytosol;nucleus;other cell component	cytoskeletal activity;other molecular function	Pf04969, Pf05002, Pf09032	27101	ENSG00000116161	CACYBP	B2ZWH2; B3KSF1; hsa:27101; O60666; Q5R370; Q5R371; Q9HB71
Q8IWB7	WD repeat and FYVE domain-containing protein 1 [OS=Homo sapiens]	0.007	2.432	4	1	1	1	410	46.3	7.33	2.03	1	other biological processes	cytosol;ER/Golgi;nucleus;other cytoplasmic organelle;other cell component	other molecular function	Pf00400, Pf01363	57590	ENSG00000085449	WDFY1	hsa:57590; Q53S17; Q8IWB7; Q9H9D5; Q9P2B3
P30101	Protein disulfide-isomerase A3 [OS=Homo sapiens]	0	68.147	41	18	33	18	505	56.7	6.35	104.78	18	cell organization and biogenesis;stress response;signal transduction;other biological processes	non-structural extracellular;other membranes;ER/Golgi;other cytoplasmic organelle;other cell component	other molecular function	Pf00085, Pf13848	2923	ENSG00000167004	PDIA3	hsa:2923; P30101; Q13453; Q14255; Q8IYF8; Q9UMU7	ER-Phagosome pathway; Antigen Presentation: Folding, assembly and peptide loading of class I MHC; Calnexin/calreticulin cycle
P22303	Acetylcholinesterase [OS=Homo sapiens]	0	11.833	6	2	4	2	614	67.8	6.29	14.69	2	cell adhesion;cell-cell signaling;cell organization and biogenesis;protein metabolism;other metabolic processes;transport;developmental processes;signal transduction;other biological processes	non-structural extracellular;extracellular matrix;plasma membrane;other membranes;ER/Golgi;nucleus;other cell component	other molecular function	Pf00135, Pf08674	43	ENSG00000087085	ACHE	A4D2E2; B7ZKZ0; D6W5X7; hsa:43; P22303; Q16169; Q29S23; Q2M324; Q504V3; Q53F46; Q86TM9; Q86YX9; Q9BXP7	Neurotransmitter clearance; Synthesis, secretion, and deacylation of Ghrelin; Synthesis of PC
P37108	Signal recognition particle 14 kDa protein [OS=Homo sapiens]	0.001	4.637	10	1	2	1	136	14.6	10.04	10.5	1	transport	non-structural extracellular;cytosol;translational apparatus;nucleus;other cell component	nucleic acid binding activity;other molecular function	Pf02290	6727	ENSG00000140319	SRP14	B5BUF5; hsa:6727; P37108; Q6B0K5; Q96Q14	Neutrophil degranulation; SRP-dependent cotranslational protein targeting to membrane
Q9BTE6	Alanyl-tRNA editing protein Aarsd1 [OS=Homo sapiens]	0.002	3.278	4	1	1	1	412	45.5	6.42	2.55	1	protein metabolism;RNA metabolism OR transcription;other metabolic processes;other biological processes	other cell component	nucleic acid binding activity;other molecular function	Pf07973	100885850; 80755	ENSG00000108825; ENSG00000266967	AARSD1	B4DI73; hsa:100885850; hsa:80755; Q9BTE6
Q5VYK3	Proteasome adapter and scaffold protein ECM29 [OS=Homo sapiens]	0	16.568	4	7	7	7	1845	204.2	7.12	16.38	7	cell organization and biogenesis;protein metabolism;other metabolic processes;stress response	cytoskeleton;ER/Golgi;nucleus;other cytoplasmic organelle;other cell component	other molecular function	Pf13001		ENSG00000136813	ECPAS	O15074; Q5VYK3; Q8WU82
O95498	Pantetheine hydrolase VNN2 [OS=Homo sapiens]	0.001	5.459	4	2	3	1	520	58.5	6.52	9.88	2	other metabolic processes	non-structural extracellular;plasma membrane;other membranes	other molecular function	Pf00795, Pf19018	8875	ENSG00000112303	VNN2	A0AUZ3; A6NDY1; A8K4E3; A8K7W0; B2DFZ0; B2DFZ1; B2DFZ2; B2DFZ3; F6XL73; hsa:8875; O95498; Q2XUN1; Q9UJF3; Q9UMW2	Post-translational modification: synthesis of GPI-anchored proteins; Vitamin B5 (pantothenate) metabolism
P13073	Cytochrome c oxidase subunit 4 isoform 1, mitochondrial [OS=Homo sapiens]	0.002	3.267	7	1	1	1	169	19.6	9.51	3.6	1	other metabolic processes;transport	other membranes;cytosol;mitochondrion;nucleus	transporter activity	Pf02936	1327	ENSG00000131143	COX4I1	B2R4J2; D3DUM7; hsa:1327; P13073; Q6P666	Respiratory electron transport; TP53 Regulates Metabolic Genes; Cytoprotection by HMOX1
Q9BTY2	Plasma alpha-L-fucosidase [OS=Homo sapiens]	0	10.098	7	3	6	3	467	54	6.25	18.68	3	other metabolic processes;other biological processes	non-structural extracellular;ER/Golgi;other cytoplasmic organelle	other molecular function	Pf01120, Pf16757	2519	ENSG00000001036	FUCA2	E9PEB6; hsa:2519; Q7Z6V1; Q7Z6Y2; Q8NBK4; Q9BTY2	Regulation of Insulin-like Growth Factor (IGF) transport and uptake by Insulin-like Growth Factor Binding Proteins (IGFBPs); Post-translational protein phosphorylation; Neutrophil degranulation
Q13501	Sequestosome-1 [OS=Homo sapiens]	0.002	4.325	3	1	2	1	440	47.7	5.22	7.88	1	cell cycle OR cell proliferation;cell organization and biogenesis;protein metabolism;RNA metabolism OR transcription;other metabolic processes;stress response;transport;signal transduction;other biological processes	cytosol;cytoskeleton;mitochondrion;ER/Golgi;nucleus;other cytoplasmic organelle;other cell component	signal transduction activity or receptor binding;kinase activity;other molecular function	Pf00564, Pf00569, Pf16577	8878	ENSG00000161011; ENSG00000284099	SQSTM1	A6NFN7; B2R661; B3KUW5; hsa:8878; Q13446; Q13501; Q9BUV7; Q9BVS6; Q9UEU1	Neddylation; Interleukin-1 signaling; Signaling by ALK fusions and activated point mutants; p75NTR recruits signalling complexes; NF-kB is activated and signals survival; Nuclear events mediated by NFE2L2; PINK1-PRKN Mediated Mitophagy; NRIF signals cell death from the nucleus; Pexophagy
Q9P0K7	Ankycorbin [OS=Homo sapiens]	0	11.204	3	3	4	3	980	110	6.21	8.9	3	other biological processes	cytosol;cytoskeleton;nucleus;other cell component	cytoskeletal activity	Pf00023, Pf12796	26064	ENSG00000039560	RAI14	E9PED3; hsa:26064; Q6V1W9; Q7Z5I4; Q7Z733; Q9P0K7; Q9P2L2; Q9Y3T5
O95433	Activator of 90 kDa heat shock protein ATPase homolog 1 [OS=Homo sapiens]	0.001	4.805	5	2	2	2	338	38.3	5.53	5.18	2	other biological processes	cytosol;ER/Golgi	other molecular function	Pf08327, Pf09229	10598	ENSG00000100591	AHSA1	B2R9L2; B4DUR9; hsa:10598; O95433; Q96IL6; Q9P060
Q08043	Alpha-actinin-3 [OS=Homo sapiens]	0	41.408	9	10	22	2	901	103.2	5.52	73.46	10	cell adhesion;cell organization and biogenesis;developmental processes;other biological processes	plasma membrane;other membranes;cytosol;cytoskeleton;other cell component	signal transduction activity or receptor binding;cytoskeletal activity;other molecular function	Pf00307, Pf00435, Pf08726	89	ENSG00000248746	ACTN3	A6NP77; hsa:89; Q08043; Q4KKV2	Nephrin family interactions; Striated Muscle Contraction
P16402	Histone H1.3 [OS=Homo sapiens]	0	44.893	27	9	44	1	221	22.3	11.02	139.58	9	cell organization and biogenesis;protein metabolism;other metabolic processes;other biological processes	nucleus;other cell component	nucleic acid binding activity;other molecular function	Pf00538	3007	ENSG00000124575	H1-3	B2R751; hsa:3007; P16402; Q2M2I2	Apoptosis induced DNA fragmentation; Formation of Senescence-Associated Heterochromatin Foci (SAHF)
P55011	Solute carrier family 12 member 2 [OS=Homo sapiens]	0.002	3.993	1	1	3	1	1212	131.4	6.4	7.44	1	cell-cell signaling;cell organization and biogenesis;stress response;transport;other biological processes	plasma membrane;other membranes;cytosol;other cell component	transporter activity;other molecular function	Pf00324, Pf03522, Pf08403	6558	ENSG00000064651	SLC12A2	hsa:6558; P55011; Q8N713; Q8WWH7	Cation-coupled Chloride cotransporters
O75581	Low-density lipoprotein receptor-related protein 6 [OS=Homo sapiens]	0.004	2.731	1	1	1	1	1613	180.3	5.31	2.52	1	cell adhesion;cell-cell signaling;cell cycle OR cell proliferation;transport;developmental processes;signal transduction;other biological processes	non-structural extracellular;plasma membrane;other membranes;ER/Golgi;other cytoplasmic organelle;other cell component	signal transduction activity or receptor binding;transporter activity;enzyme regulator activity;other molecular function	Pf00057, Pf00058, Pf14670	4040	ENSG00000070018; ENSG00000281324	LRP6	hsa:4040; O75581; Q17RZ2	Disassembly of the destruction complex and recruitment of AXIN to the membrane; Negative regulation of TCF-dependent signaling by WNT ligand antagonists; Regulation of FZD by ubiquitination; Signaling by RNF43 mutants
P13861	cAMP-dependent protein kinase type II-alpha regulatory subunit [OS=Homo sapiens]	0	16.861	14	4	6	3	404	45.5	5.07	19.55	4	signal transduction;other biological processes	plasma membrane;other membranes;cytosol;cytoskeleton;other cell component	other molecular function	Pf00027, Pf02197	5576	ENSG00000114302	PRKAR2A	hsa:5576; P13861; Q16823; Q9BUB1	FCGR3A-mediated IL10 synthesis; PKA activation; DARPP-32 events; CREB1 phosphorylation through the activation of Adenylate Cyclase; GPER1 signaling; ADORA2B mediated anti-inflammatory cytokines production; Factors involved in megakaryocyte development and platelet production; Glucagon-like Peptide-1 (GLP1) regulates insulin secretion; Vasopressin regulates renal water homeostasis via Aquaporins; …
Q09161	Nuclear cap-binding protein subunit 1 [OS=Homo sapiens]	0	8.284	5	3	3	3	790	91.8	6.43	7.7	3	cell organization and biogenesis;protein metabolism;RNA metabolism OR transcription;other metabolic processes;stress response;transport;other biological processes	cytosol;mitochondrion;nucleus;other cell component	nucleic acid binding activity;other molecular function	Pf02854, Pf09088, Pf09090	4686	ENSG00000136937	NCBP1	B2R718; hsa:4686; Q09161; Q59G76; Q5T1V0; Q5T7X2	mRNA Splicing - Major Pathway; Regulation of expression of SLITs and ROBOs; Nonsense Mediated Decay (NMD) enhanced by the Exon Junction Complex (EJC); Nonsense Mediated Decay (NMD) independent of the Exon Junction Complex (EJC); Transport of the SLBP independent Mature mRNA; Transport of the SLBP Dependant Mature mRNA; Transport of Mature mRNA Derived from an Intronless Transcript; Transport of M…
P12081	Histidine--tRNA ligase, cytoplasmic [OS=Homo sapiens]	0	11.983	9	4	6	4	509	57.4	5.88	15.11	4	protein metabolism;RNA metabolism OR transcription;other metabolic processes	cytosol;mitochondrion;other cell component	other molecular function	Pf00458, Pf03129, Pf13393	3035	ENSG00000170445	HARS1	B4DHQ1; B4DY73; D6REN6; hsa:3035; J3KNE5; P12081	Cytosolic tRNA aminoacylation
P13804	Electron transfer flavoprotein subunit alpha, mitochondrial [OS=Homo sapiens]	0.001	5.25	8	2	2	2	333	35.1	8.38	6.9	2	other metabolic processes	mitochondrion;other cell component	other molecular function	Pf00766, Pf01012	2108	ENSG00000140374	ETFA	B4DT43; hsa:2108; P13804; Q53XN3	Respiratory electron transport
Q9NS98	Semaphorin-3G [OS=Homo sapiens]	0.009	2.291	1	1	1	1	782	86.6	7.78	2.14	1	cell organization and biogenesis;developmental processes;signal transduction;other biological processes	non-structural extracellular;plasma membrane;other membranes	signal transduction activity or receptor binding	Pf00047, Pf01403	56920	ENSG00000010319	SEMA3G	hsa:56920; Q7L9D9; Q9H7Q3; Q9NS98
P46531	Neurogenic locus notch homolog protein 1 [OS=Homo sapiens]	0.009	2.315	0	1	2	1	2555	272.3	5.12	3.47	1	cell cycle OR cell proliferation;cell organization and biogenesis;protein metabolism;RNA metabolism OR transcription;other metabolic processes;stress response;transport;developmental processes;signal transduction;other biological processes	non-structural extracellular;plasma membrane;other membranes;cytosol;ER/Golgi;nucleus;other cell component	signal transduction activity or receptor binding;enzyme regulator activity;nucleic acid binding activity;other molecular function	Pf00008, Pf00023, Pf00066, Pf06816, Pf07645, Pf07684, Pf12661, Pf12796, Pf13637	4851	ENSG00000148400	NOTCH1	hsa:4851; P46531; Q59ED8; Q5SXM3	NOTCH4 Intracellular Domain Regulates Transcription; Formation of paraxial mesoderm; Activated NOTCH1 Transmits Signal to the Nucleus; Constitutive Signaling by NOTCH1 PEST Domain Mutants; Constitutive Signaling by NOTCH1 HD Domain Mutants; Constitutive Signaling by NOTCH1 HD+PEST Domain Mutants; Constitutive Signaling by NOTCH1 t(7;9)(NOTCH1:M1580_K2555) Translocation Mutant; Pre-NOTCH Processin…
P35916	Vascular endothelial growth factor receptor 3 [OS=Homo sapiens]	0	14.955	4	4	4	4	1363	152.7	6.3	12.99	4	protein metabolism;other metabolic processes;developmental processes;signal transduction;other biological processes	non-structural extracellular;plasma membrane;other membranes;cytosol;nucleus;other cell component	kinase activity;other molecular function	Pf07679, Pf07714, Pf13927, Pf17988	2324	ENSG00000037280	FLT4	A8K6L4; B5A926; hsa:2324; P35916; Q16067; Q86W07; Q86W08	VEGF binds to VEGFR leading to receptor dimerization; NOTCH4 Intracellular Domain Regulates Transcription
Q9P0V3	SH3 domain-binding protein 4 [OS=Homo sapiens]	0.007	2.412	1	1	2	1	963	107.4	7.71	3.37	1	transport;other biological processes	plasma membrane;other membranes;nucleus;other cell component	enzyme regulator activity;other molecular function	Pf00018, Pf00791, Pf07653	23677	ENSG00000130147	SH3BP4	hsa:23677; O95082; Q309A3; Q53QD0; Q53TD1; Q9P0V3	Amino acids regulate mTORC1
O96019	Actin-like protein 6A [OS=Homo sapiens]	0	11.348	14	3	4	3	429	47.4	5.6	14.37	3	cell organization and biogenesis;protein metabolism;DNA metabolism;RNA metabolism OR transcription;other metabolic processes;stress response;developmental processes;signal transduction;other biological processes	plasma membrane;other membranes;nucleus;other cell component	other molecular function	Pf00022	86	ENSG00000136518	ACTL6A	B3KMN1; D3DNR9; hsa:86; O96019; Q8TAE5; Q9BVS8; Q9H0W6	RMTs methylate histone arginines; UCH proteinases; RUNX1 interacts with co-factors whose precise effect on RUNX1 targets is not known; HATs acetylate histones; DNA Damage Recognition in GG-NER
Q9GZX9	Twisted gastrulation protein homolog 1 [OS=Homo sapiens]	0.002	3.252	7	1	1	1	223	25	5.34	3.29	1	developmental processes;signal transduction;other biological processes	non-structural extracellular	other molecular function	Pf04668	57045	ENSG00000128791	TWSG1	B2RE08; D3DUH9; hsa:57045; Q8NBI7; Q96K46; Q9GZX9
P11117	Lysosomal acid phosphatase [OS=Homo sapiens]	0.002	3.192	6	2	2	2	423	48.3	6.74	4.61	2	cell organization and biogenesis;other metabolic processes	other membranes;other cytoplasmic organelle	other molecular function	Pf00328	53	ENSG00000134575	ACP2	E9PCI1; hsa:53; P11117; Q561W5; Q9BTU7
Q9ULE6	Paladin [OS=Homo sapiens]	0.001	6.682	2	2	4	2	856	96.7	6.54	10.7	2		cytosol;other cell component	other molecular function	Pf14566	27143	ENSG00000107719	PALD1	B2RMS1; B9EGC6; hsa:27143; Q5JTK7; Q5JTK8; Q9ULE6
P78345	Ribonuclease P protein subunit p38 [OS=Homo sapiens]	0.007	2.408	4	1	1	1	283	31.8	9.92	1.88	1	RNA metabolism OR transcription;other metabolic processes	nucleus;other cell component	nucleic acid binding activity;other molecular function	Pf01248	10557	ENSG00000152464	RPP38	B3KPY0; D3DRT8; hsa:10557; P78345; Q53F71; Q8NHS8	Major pathway of rRNA processing in the nucleolus and cytosol; tRNA processing in the nucleus
O60684	Importin subunit alpha-7 [OS=Homo sapiens]	0.002	3.773	3	1	1	1	536	60	4.98	4.48	1	RNA metabolism OR transcription;other metabolic processes;transport;other biological processes	cytosol;nucleus;other cell component	other molecular function	Pf00514, Pf01749, Pf16186	23633	ENSG00000025800	KPNA6	B2RDC7; D3DPP5; hsa:23633; O60684; Q5VVU3	Assembly of the ORC complex at the origin of replication
O00214	Galectin-8 [OS=Homo sapiens]	0.006	2.56	3	1	1	1	317	35.8	8.25	3.24	1	other metabolic processes;stress response;developmental processes;other biological processes	non-structural extracellular;cytosol;other cell component	signal transduction activity or receptor binding;other molecular function	Pf00337	3964	ENSG00000116977	LGALS8	hsa:3964; O00214; O15215; Q5T3P5; Q5T3Q4; Q8TEV1; Q96B92; Q9BXC8; Q9H584; Q9H585; Q9UEZ6; Q9UP32; Q9UP33; Q9UP34
Q562R1	Beta-actin-like protein 2 [OS=Homo sapiens]	0	88.963	30	12	223	3	376	42	5.59	703.07	12	cell organization and biogenesis;developmental processes;other biological processes	other membranes;cytoskeleton;other cell component	cytoskeletal activity;other molecular function	Pf00022	345651	ENSG00000169067	ACTBL2	B2RPJ1; hsa:345651; Q562R1; Q562R2; Q562S9; Q562X8
P23458	Tyrosine-protein kinase JAK1 [OS=Homo sapiens]	0	11.559	4	4	8	4	1154	133.2	7.55	19.6	4	protein metabolism;other metabolic processes;stress response;signal transduction;other biological processes	other membranes;cytosol;cytoskeleton;nucleus;other cytoplasmic organelle;other cell component	signal transduction activity or receptor binding;kinase activity;other molecular function	Pf07714, Pf17887, Pf18377, Pf18379	3716	ENSG00000162434	JAK1	hsa:3716; P23458; Q59GQ2; Q9UD26	SARS-CoV-2 activates/modulates innate and adaptive immune responses; Interleukin-4 and Interleukin-13 signaling; Interleukin-10 signaling; ISG15 antiviral mechanism; Inactivation of CSF3 (G-CSF) signaling; Potential therapeutics for SARS; Interleukin receptor SHC signaling; RAF/MAP kinase cascade; Interleukin-7 signaling; Interleukin-6 signaling; Regulation of IFNG signaling; Regulation of IFNA/I…
Q13144	Translation initiation factor eIF-2B subunit epsilon [OS=Homo sapiens]	0.001	4.416	3	1	3	1	721	80.3	5.08	10.12	1	protein metabolism;other metabolic processes;stress response;developmental processes;signal transduction;other biological processes	cytosol;translational apparatus;nucleus;other cell component	enzyme regulator activity;nucleic acid binding activity;other molecular function	Pf02020	8893	ENSG00000145191	EIF2B5	hsa:8893; Q13144; Q541Z1; Q96D04	Recycling of eIF2:GDP
O14979	Heterogeneous nuclear ribonucleoprotein D-like [OS=Homo sapiens]	0.001	7.703	6	3	4	2	420	46.4	9.57	10.37	3	RNA metabolism OR transcription;other metabolic processes;other biological processes	cytosol;nucleus	nucleic acid binding activity	Pf00076	9987	ENSG00000152795	HNRNPDL	hsa:9987; O14979; Q6SPF2; Q7KZ74; Q7KZ75; Q96IM0; Q96S43	Gene and protein expression by JAK-STAT signaling after Interleukin-12 stimulation
Q6PIU2	Neutral cholesterol ester hydrolase 1 [OS=Homo sapiens]	0.002	3.116	3	1	1	1	408	45.8	7.23	2.39	1	protein metabolism;other metabolic processes;signal transduction;other biological processes	plasma membrane;other membranes;ER/Golgi	other molecular function	Pf07859	57552	ENSG00000144959	NCEH1	B7Z2K4; B7Z3A1; B7Z5U2; B7Z906; B7ZAW6; F5H7K4; hsa:57552; Q6PIU2; Q86WZ1; Q9P2I4	LDL clearance
Q16864	V-type proton ATPase subunit F [OS=Homo sapiens]	0.002	4.248	10	1	2	1	119	13.4	5.52	6.53	1	cell organization and biogenesis;transport;other biological processes	other membranes;cytosol;ER/Golgi;other cytoplasmic organelle;other cell component	transporter activity	Pf01990	9296	ENSG00000128524	ATP6V1F	C9J2K4; hsa:9296; Q16864; Q6IBA8	Amino acids regulate mTORC1; ROS and RNS production in phagocytes; Insulin receptor recycling; Transferrin endocytosis and recycling; Ion channel transport
O43286	Beta-1,4-galactosyltransferase 5 [OS=Homo sapiens]	0	8.671	10	3	3	3	388	45.1	8.15	6.19	3	cell organization and biogenesis;protein metabolism;other metabolic processes;developmental processes;other biological processes	other membranes;ER/Golgi	other molecular function	Pf02709, Pf13733	9334	ENSG00000158470	B4GALT5	E1P625; hsa:9334; O43286; Q2M394; Q9UJQ8; U6C5D7	N-Glycan antennae elongation; Keratan sulfate biosynthesis; O-linked glycosylation of mucins
Q16740	ATP-dependent Clp protease proteolytic subunit, mitochondrial [OS=Homo sapiens]	0.002	3.795	5	1	1	1	277	30.2	8.09	3.59	1	protein metabolism;other metabolic processes	mitochondrion;other cell component	other molecular function	Pf00574	8192	ENSG00000125656	CLPP	B2R4W5; hsa:8192; Q16740
P01034	Cystatin-C [OS=Homo sapiens]	0.002	3.146	8	1	2	1	146	15.8	8.75	6.35	1	cell organization and biogenesis;stress response;other biological processes	non-structural extracellular;plasma membrane;other membranes;ER/Golgi;other cell component	enzyme regulator activity;other molecular function	Pf00031	1471	ENSG00000101439	CST3	B2R5J9; D3DW42; hsa:1471; P01034; Q6FGW9	Neutrophil degranulation; Amyloid fiber formation; Regulation of Insulin-like Growth Factor (IGF) transport and uptake by Insulin-like Growth Factor Binding Proteins (IGFBPs); Post-translational protein phosphorylation
Q5KU26	Collectin-12 [OS=Homo sapiens]	0.002	3.995	1	1	2	1	742	81.5	5.69	5.3	1	cell organization and biogenesis;stress response;transport;signal transduction;other biological processes	non-structural extracellular;extracellular matrix;plasma membrane;other membranes;other cell component	other molecular function	Pf00059, Pf01391	81035	ENSG00000158270	COLEC12	hsa:81035; Q5KU26; Q6P9F2; Q8TCR2; Q8WZA4; Q9BY85; Q9BYH7	Scavenging by Class A Receptors; Immunoregulatory interactions between a Lymphoid and a non-Lymphoid cell
P04278	Sex hormone-binding globulin [OS=Homo sapiens]	0.001	4.489	4	1	4	1	402	43.8	6.71	14.88	1		non-structural extracellular	other molecular function	Pf00054	6462	ENSG00000129214	SHBG	B0FWH4; B4DYU0; E9PGW1; F5H5Z8; hsa:6462; I3L1N7; P04278; P14689; Q16616; Q3MIL0; Q6ISD2
P62140	Serine/threonine-protein phosphatase PP1-beta catalytic subunit [OS=Homo sapiens]	0	12.255	12	3	7	1	327	37.2	6.19	30.19	3	cell cycle OR cell proliferation;protein metabolism;other metabolic processes;signal transduction;other biological processes	plasma membrane;other membranes;cytosol;nucleus;other cell component	other molecular function	Pf00149, Pf16891	5500	ENSG00000213639	PPP1CB	B2R5V4; D6W565; hsa:5500; P37140; P62140; Q5U087; Q6FG45	RHO GTPases activate CIT; RHO GTPases activate PKNs; RHO GTPases Activate ROCKs; Triglyceride catabolism; Regulation of PLK1 Activity at G2/M Transition; Circadian Clock; RAF activation; SHOC2 M1731 mutant abolishes MRAS complex function; Gain-of-function MRAS complexes activate RAF signaling; RHO GTPases activate PAKs; Downregulation of TGF-beta receptor signaling
O95373	Importin-7 [OS=Homo sapiens]	0.001	6.867	3	2	3	2	1038	119.4	4.82	8.13	2	stress response;transport;other biological processes	cytosol;nucleus	enzyme regulator activity;other molecular function	Pf03810, Pf08506	10527	ENSG00000205339	IPO7	A6NNM5; B2R786; hsa:10527; O95373; Q1RMF7; Q9H177; Q9NTE3
Q96CN7	Isochorismatase domain-containing protein 1 [OS=Homo sapiens]	0.002	4.18	5	1	1	1	298	32.2	7.39	2.44	1		other cytoplasmic organelle;other cell component		Pf00857	51015	ENSG00000066583	ISOC1	hsa:51015; Q7Z770; Q96CN7
O00567	Nucleolar protein 56 [OS=Homo sapiens]	0	12.287	10	5	5	5	594	66	9.19	12.06	5	RNA metabolism OR transcription;other metabolic processes	nucleus;other cell component	nucleic acid binding activity;other molecular function	Pf01798, Pf08156	10528	ENSG00000101361	NOP56	hsa:10528; O00567; Q2M3T6; Q9NQ05	Major pathway of rRNA processing in the nucleolus and cytosol; rRNA modification in the nucleus and cytosol; Association of TriC/CCT with target proteins during biosynthesis
Q8N1I0	Dedicator of cytokinesis protein 4 [OS=Homo sapiens]	0.006	2.554	1	2	2	2	1966	225.1	7.65	3.97	2	signal transduction;other biological processes	plasma membrane;other membranes;cytosol;ER/Golgi;nucleus;other cell component	signal transduction activity or receptor binding;enzyme regulator activity;other molecular function	Pf06920, Pf07653, Pf14429, Pf16172, Pf20421, Pf20422	9732	ENSG00000128512	DOCK4	hsa:9732; O14584; O94824; Q8N1I0; Q8NB45	RAC1 GTPase cycle; RAC2 GTPase cycle; Factors involved in megakaryocyte development and platelet production; RHOG GTPase cycle
O75173	A disintegrin and metalloproteinase with thrombospondin motifs 4 [OS=Homo sapiens]	0.001	4.824	3	1	1	1	837	90.1	7.85	4.97	1	cell organization and biogenesis;protein metabolism;developmental processes	non-structural extracellular;extracellular matrix;nucleus	other molecular function	Pf00090, Pf01421, Pf01562, Pf05986, Pf17771, Pf19236	9507	ENSG00000158859	ADAMTS4	hsa:9507; O75173; Q2HYD0; Q5VTW2; Q6P4Q8; Q6UWA8; Q9UN83	Defective B3GALTL causes PpS; O-glycosylation of TSR domain-containing proteins; Degradation of the extracellular matrix
O75436	Vacuolar protein sorting-associated protein 26A [OS=Homo sapiens]	0	10.153	14	3	6	3	327	38.1	6.57	14.02	3	transport;other biological processes	other membranes;cytosol;other cytoplasmic organelle;other cell component		Pf03643	9559	ENSG00000122958	VPS26A	A8MZ56; B2RDD3; hsa:9559; O75436; Q8TBH4; Q9H982	WNT ligand biogenesis and trafficking
P20742	Pregnancy zone protein [OS=Homo sapiens]	0	41.014	7	8	43	2	1482	163.8	6.38	105.59	8	other biological processes	non-structural extracellular	enzyme regulator activity;other molecular function	Pf00207, Pf01835, Pf07677, Pf07678, Pf07703, Pf17789, Pf17791		ENSG00000126838	PZP	A6ND27; P20742; Q15273; Q2NKL2; Q7M4N7
P23229	Integrin alpha-6 [OS=Homo sapiens]	0	10.54	3	3	6	3	1130	126.5	6.61	13.29	3	cell adhesion;cell organization and biogenesis;developmental processes;signal transduction;other biological processes	plasma membrane;other membranes;other cell component	signal transduction activity or receptor binding;other molecular function	Pf01839, Pf08441	3655	ENSG00000091409	ITGA6	B2RMU9; B4DG69; B4DKB8; C4AM96; G5E9H1; hsa:3655; P23229; Q08443; Q0MRC7; Q14646; Q16508; Q53RX7; Q59HB7; Q86VL6; Q9UCT1; Q9UN03	Assembly of collagen fibrils and other multimeric structures; Integrin cell surface interactions; Syndecan interactions; Laminin interactions; Basigin interactions; Type I hemidesmosome assembly
Q9UDY4	DnaJ homolog subfamily B member 4 [OS=Homo sapiens]	0.001	6.585	7	2	2	1	337	37.8	8.5	6.27	2	stress response;other biological processes	plasma membrane;other membranes;cytosol;nucleus	other molecular function	Pf00226, Pf01556	11080	ENSG00000162616	DNAJB4	B2R824; hsa:11080; Q13431; Q9UDY4
Q99983	Osteomodulin [OS=Homo sapiens]	0.003	3.043	2	1	2	1	421	49.5	5.59	7.28	1	cell adhesion	non-structural extracellular;extracellular matrix;ER/Golgi;other cytoplasmic organelle		Pf13855	4958	ENSG00000127083	OMD	hsa:4958; Q5TBF4; Q99983	Keratan sulfate biosynthesis; Keratan sulfate degradation; Defective CHST6 causes MCDC1; Defective ST3GAL3 causes MCT12 and EIEE15; Defective B4GALT1 causes B4GALT1-CDG (CDG-2d)
P52272	Heterogeneous nuclear ribonucleoprotein M [OS=Homo sapiens]	0	10.284	6	4	4	4	730	77.5	8.7	7.44	4	RNA metabolism OR transcription;other metabolic processes;stress response	nucleus;other cell component	nucleic acid binding activity;other molecular function	Pf00076, Pf11532	4670	ENSG00000099783	HNRNPM	hsa:4670; P52272; Q15584; Q8WZ44; Q96H56; Q9BWL9; Q9Y492	mRNA Splicing - Major Pathway; Processing of Capped Intron-Containing Pre-mRNA; FGFR2 alternative splicing
Q9NP79	Vacuolar protein sorting-associated protein VTA1 homolog [OS=Homo sapiens]	0.001	5.002	7	1	1	1	307	33.9	6.29	5.24	1	cell organization and biogenesis;other metabolic processes;transport;other biological processes	other membranes;cytosol;nucleus;other cytoplasmic organelle;other cell component		Pf04652, Pf18097	51534	ENSG00000009844	VTA1	B4DW55; E1P594; E7ETQ7; hsa:51534; Q5TGM1; Q6IAE8; Q9H0R2; Q9H3K9; Q9NP79; Q9P0Q0	Budding and maturation of HIV virion; Endosomal Sorting Complex Required For Transport (ESCRT)
P35611	Alpha-adducin [OS=Homo sapiens]	0.001	4.749	2	1	2	1	737	80.9	5.83	8.69	1	cell organization and biogenesis;other biological processes	plasma membrane;other membranes;cytosol;cytoskeleton;nucleus;other cell component	cytoskeletal activity;other molecular function	Pf00596	118	ENSG00000087274	ADD1	A2A3N8; A2A3P0; B4DI79; D3DVR3; D3DVR4; D3DVR5; hsa:118; P35611; Q13734; Q14729; Q16156; Q86XM2; Q9UJB6	XBP1(S) activates chaperone genes; Caspase-mediated cleavage of cytoskeletal proteins; Miscellaneous transport and binding events
Q6UXN9	WD repeat-containing protein 82 [OS=Homo sapiens]	0.002	4.36	4	1	2	1	313	35.1	7.69	7.77	1	protein metabolism;RNA metabolism OR transcription;other metabolic processes;other biological processes	nucleus;other cell component	other molecular function	Pf00400	80335	ENSG00000164091	WDR82	A8K5R5; hsa:80335; Q6UXN9; Q8TEB2
Q9NVE7	4'-phosphopantetheine phosphatase [OS=Homo sapiens]	0.002	3.291	2	1	1	1	773	85.9	6.28	2.75	1	other metabolic processes	cytosol;nucleus	other molecular function	Pf01937, Pf03630	55229	ENSG00000157881; ENSG00000273494	PANK4	B9DI84; hsa:55229; Q53EU3; Q5TA84; Q7RTX3; Q9H3X5; Q9NVE7	Coenzyme A biosynthesis
P36915	Guanine nucleotide-binding protein-like 1 [OS=Homo sapiens]	0.002	3.333	3	2	2	2	607	68.6	5.8	0	2	stress response;signal transduction;other biological processes	non-structural extracellular	other molecular function	Pf01926	2794	ENSG00000204590; ENSG00000206492; ENSG00000226882; ENSG00000228581; ENSG00000229470; ENSG00000232143; ENSG00000235986	GNL1	B0S838; hsa:2794; P36915; Q96CT5
O94832	Unconventional myosin-Id [OS=Homo sapiens]	0.007	2.497	1	1	1	1	1006	116.1	9.39	0	1	cell organization and biogenesis;transport;other biological processes	plasma membrane;other membranes;cytosol;cytoskeleton;ER/Golgi;other cytoplasmic organelle;other cell component	cytoskeletal activity;other molecular function	Pf00063, Pf00612, Pf06017	4642	ENSG00000176658	MYO1D	A6H8V3; hsa:4642; O94832; Q8NHP9
Q16798	NADP-dependent malic enzyme, mitochondrial [OS=Homo sapiens]	0.002	3.147	1	1	3	1	604	67	7.97	5.19	1	other metabolic processes	mitochondrion	other molecular function	Pf00390, Pf03949	10873	ENSG00000151376	ME3	B7Z6V0; hsa:10873; Q16798; Q8TBJ0	Citric acid cycle (TCA cycle)
Q09028	Histone-binding protein RBBP4 [OS=Homo sapiens]	0	8.44	8	2	3	1	425	47.6	4.89	19.37	2	cell cycle OR cell proliferation;cell organization and biogenesis;protein metabolism;DNA metabolism;other metabolic processes;developmental processes;other biological processes	cytosol;nucleus;other cell component	nucleic acid binding activity;other molecular function	Pf00400, Pf12265	5928	ENSG00000162521	RBBP4	B2R6G9; B4DRH0; D3DPQ3; hsa:5928; P31149; Q09028; Q53H02; Q96BV9	Potential therapeutics for SARS; Oxidative Stress Induced Senescence; Activation of anterior HOX genes in hindbrain development during early embryogenesis; HCMV Early Events; Deposition of new CENPA-containing nucleosomes at the centromere; Regulation of PTEN gene transcription; Transcriptional Regulation by E2F6; HDACs deacetylate histones; PKMTs methylate histone lysines; RNA Polymerase I Trans…
Q9UKM9	RNA-binding protein Raly [OS=Homo sapiens]	0.001	4.762	7	2	2	2	306	32.4	9.17	2.17	2	RNA metabolism OR transcription;other metabolic processes;other biological processes	nucleus	other molecular function	Pf00076	22913	ENSG00000125970	RALY	hsa:22913; Q14621; Q2M365; Q5QPL8; Q9BQX6; Q9UJE3; Q9UKM9
Q13610	Periodic tryptophan protein 1 homolog [OS=Homo sapiens]	0.001	5.946	5	2	2	2	501	55.8	4.77	4.8	2	RNA metabolism OR transcription;other metabolic processes;other biological processes	ER/Golgi;nucleus;other cell component	other molecular function	Pf00400	11137	ENSG00000136045	PWP1	A8K3R6; hsa:11137; Q13610; Q7Z3X9
P50395	Rab GDP dissociation inhibitor beta [OS=Homo sapiens]	0	8.68	10	3	3	3	445	50.6	6.47	8.06	3	transport;signal transduction;other biological processes	non-structural extracellular;other membranes;cytosol;ER/Golgi;other cytoplasmic organelle;other cell component	enzyme regulator activity;other molecular function	Pf00996	2665	ENSG00000057608	GDI2	hsa:2665; O43928; P50395; Q5SX88; Q9UQM6	Neutrophil degranulation; RAB GEFs exchange GTP for GDP on RABs
O15173	Membrane-associated progesterone receptor component 2 [OS=Homo sapiens]	0.004	2.788	4	1	3	1	223	23.8	4.88	6.57	1	transport;signal transduction;other biological processes	ER/Golgi;nucleus;other cell component	transporter activity;other molecular function	Pf00173	10424	ENSG00000164040	PGRMC2	hsa:10424; O15173; Q569H1	RHOA GTPase cycle; RHOG GTPase cycle; RAC2 GTPase cycle; RAC3 GTPase cycle; RHOD GTPase cycle
Q8TDI0	Chromodomain-helicase-DNA-binding protein 5 [OS=Homo sapiens]	0.003	2.949	1	1	1	1	1954	222.9	6.15	2.59	1	cell organization and biogenesis;protein metabolism;other metabolic processes;developmental processes;other biological processes	cytosol;nucleus;other cell component	nucleic acid binding activity;other molecular function	Pf00176, Pf00271, Pf00385, Pf00628, Pf06461, Pf06465, Pf08073, Pf08074	26038	ENSG00000116254	CHD5	hsa:26038; O75032; Q5TG89; Q7LGH2; Q8TDI0; Q9UFR9
Q8TDQ7	Glucosamine-6-phosphate isomerase 2 [OS=Homo sapiens]	0	22.814	25	5	11	3	276	31.1	6.95	35.03	5	other metabolic processes	cytosol;other cell component	other molecular function	Pf01182	132789	ENSG00000163281	GNPDA2	B4DJF3; hsa:132789; Q2VYF1; Q59EA7; Q8NCZ8; Q8TDQ7; Q96BJ4; Q96NC6	Glycolysis
Q15233	Non-POU domain-containing octamer-binding protein [OS=Homo sapiens]	0	10.49	10	4	9	3	471	54.2	8.95	20.95	4	DNA metabolism;RNA metabolism OR transcription;other metabolic processes;stress response;other biological processes	nucleus;other cell component	nucleic acid binding activity;other molecular function	Pf00076, Pf08075	4841	ENSG00000147140	NONO	B7Z4C2; D3DVV4; F5GYZ3; hsa:4841; O00201; P30807; Q12786; Q15233; Q9BQC5
O14907	Tax1-binding protein 3 [OS=Homo sapiens]	0.001	4.79	14	1	2	1	124	13.7	8.48	8.22	1	cell-cell signaling;protein metabolism;signal transduction;other biological processes	plasma membrane;other membranes;cytosol;cytoskeleton;nucleus;other cell component	other molecular function	Pf00595, Pf02163	30851	ENSG00000213977	TAX1BP3	B2RD53; D3DTJ6; hsa:30851; O14907; Q7LCQ4	RHO GTPases Activate Rhotekin and Rhophilins
O95347	Structural maintenance of chromosomes protein 2 [OS=Homo sapiens]	0.002	4.289	1	1	1	1	1197	135.6	8.43	3.41	1	cell cycle OR cell proliferation;cell organization and biogenesis;other biological processes	cytosol;nucleus;other cell component	nucleic acid binding activity;other molecular function	Pf02463, Pf06470	10592	ENSG00000136824	SMC2	hsa:10592; O95347; Q6IEE0; Q9P1P2	Condensation of Prophase Chromosomes; Condensation of Prometaphase Chromosomes
P09960	Leukotriene A-4 hydrolase [OS=Homo sapiens]	0	8.463	5	3	4	3	611	69.2	6.18	12.42	3	protein metabolism;other metabolic processes;developmental processes;other biological processes	non-structural extracellular;cytosol;nucleus;other cell component	other molecular function	Pf01433, Pf09127, Pf17900	4048	ENSG00000111144	LTA4H	B4DNQ9; F8VV40; hsa:4048; P09960; Q6IAT6; Q9UCT7	Neutrophil degranulation; Biosynthesis of protectins; Synthesis of Leukotrienes (LT) and Eoxins (EX); Biosynthesis of D-series resolvins; Biosynthesis of E-series 18(S)-resolvins; Biosynthesis of aspirin-triggered D-series resolvins; Biosynthesis of E-series 18(R)-resolvins
Q00765	Receptor expression-enhancing protein 5 [OS=Homo sapiens]	0	13.981	16	4	8	4	189	21.5	8.1	24.3	4	cell organization and biogenesis;other biological processes	other membranes;cytosol;ER/Golgi		Pf03134	7905	ENSG00000129625	REEP5	B7Z681; D3DT04; hsa:7905; Q00765; Q04198; Q5QGT0; Q9BWH9
Q1KMD3	Heterogeneous nuclear ribonucleoprotein U-like protein 2 [OS=Homo sapiens]	0	11.971	8	5	6	5	747	85.1	4.91	9.01	5		nucleus;other cell component		Pf00622, Pf02037, Pf13671	221092	ENSG00000214753	HNRNPUL2	hsa:221092; Q1KMD3; Q8N3B3
P30837	Aldehyde dehydrogenase X, mitochondrial [OS=Homo sapiens]	0.001	4.858	3	2	5	1	517	57.2	6.99	13.91	2	other metabolic processes	cytosol;mitochondrion;nucleus	other molecular function	Pf00171	219	ENSG00000137124	ALDH1B1	B2R8F0; hsa:219; P30837; Q8WX76; Q9BV45	Ethanol oxidation
Q86TI2	Dipeptidyl peptidase 9 [OS=Homo sapiens]	0	10.54	5	3	4	3	863	98.2	6.46	14.94	3	protein metabolism;other biological processes	cytosol;cytoskeleton;nucleus;other cell component	other molecular function	Pf00326, Pf00930, Pf19520	91039	ENSG00000142002	DPP9	hsa:91039; O75273; O75868; Q1ZZB8; Q6AI37; Q6UAL0; Q6ZMT2; Q6ZNJ5; Q86TI2; Q8N2J7; Q8N3F5; Q8WXD8; Q96NT8; Q9BVR3
P54727	UV excision repair protein RAD23 homolog B [OS=Homo sapiens]	0.002	4.316	4	2	3	2	409	43.1	4.84	7.65	2	protein metabolism;DNA metabolism;other metabolic processes;stress response;developmental processes;other biological processes	cytosol;nucleus;other cell component	nucleic acid binding activity;other molecular function	Pf00240, Pf00627, Pf09280	5887	ENSG00000119318	RAD23B	B3KWK8; G5E9P0; hsa:5887; P54727; Q7Z5K8; Q8WUB0	Josephin domain DUBs; Formation of Incision Complex in GG-NER; DNA Damage Recognition in GG-NER; N-glycan trimming in the ER and Calnexin/Calreticulin cycle
P08581	Hepatocyte growth factor receptor [OS=Homo sapiens]	0	9.839	3	3	5	3	1390	155.4	7.33	17.4	3	protein metabolism;other metabolic processes;transport;developmental processes;signal transduction;other biological processes	non-structural extracellular;plasma membrane;other membranes;other cell component	kinase activity;other molecular function	Pf01403, Pf01437, Pf01833, Pf07714	4233	ENSG00000105976	MET	A1L467; B5A932; E7EQ94; hsa:4233; O60366; P08581; Q12875; Q9UDX7; Q9UPL8	MET activates PTK2 signaling; MET interacts with TNS proteins; PIP3 activates AKT signaling; Constitutive Signaling by Aberrant PI3K in Cancer; PI5P, PP2A and IER3 Regulate PI3K/AKT Signaling; RAF/MAP kinase cascade; InlB-mediated entry of Listeria monocytogenes into host cell; Sema4D mediated inhibition of cell attachment and migration; MET Receptor Activation; MET activates RAS signaling; MET a…
Q9NZL9	Methionine adenosyltransferase 2 subunit beta [OS=Homo sapiens]	0.001	5.218	4	1	2	1	334	37.5	7.36	7.23	1	other metabolic processes	cytosol;nucleus;other cell component	enzyme regulator activity;other molecular function	Pf04321	27430	ENSG00000038274	MAT2B	B2R5Y6; hsa:27430; Q1WAI7; Q27J92; Q3LIE8; Q567T7; Q6NYC7; Q9BS89; Q9H3E1; Q9NZL9; Q9UJ54	Ub-specific processing proteases; Methylation
Q96EC8	Protein YIPF6 [OS=Homo sapiens]	0.007	2.359	5	1	1	1	236	26.2	5.64	1.81	1	transport;developmental processes	other membranes;ER/Golgi;other cell component	other molecular function	Pf04893	286451	ENSG00000181704	YIPF6	B4E1U7; G5E997; hsa:286451; Q5JP08; Q96EC8	Golgi Associated Vesicle Biogenesis
Q969T4	Ubiquitin-conjugating enzyme E2 E3 [OS=Homo sapiens]	0.002	3.334	9	1	1	1	207	22.9	7.18	2.74	1	protein metabolism;other metabolic processes	cytosol;nucleus	other molecular function	Pf00179	10477	ENSG00000170035	UBE2E3	B2RAD6; D3DPG3; hsa:10477; Q5U0R7; Q7Z4W4; Q969T4	Antigen processing: Ubiquitination & Proteasome degradation; Synthesis of active ubiquitin: roles of E1 and E2 enzymes
Q00325	Phosphate carrier protein, mitochondrial [OS=Homo sapiens]	0.002	3.32	3	1	3	1	362	40.1	9.38	8.79	1	transport	plasma membrane;other membranes;mitochondrion	transporter activity;other molecular function	Pf00153	5250	ENSG00000075415	SLC25A3	B3KS34; hsa:5250; Q00325; Q7Z7N7; Q96A03
P15927	Replication protein A 32 kDa subunit [OS=Homo sapiens]	0.004	2.664	3	1	1	1	270	29.2	6.15	2.8	1	cell cycle OR cell proliferation;cell organization and biogenesis;DNA metabolism;other metabolic processes;stress response;signal transduction;other biological processes	nucleus;other cell component	nucleic acid binding activity;other molecular function	Pf08784	6118	ENSG00000117748	RPA2	hsa:6118; P15927; Q52II0; Q5TEI9; Q5TEJ5	Fanconi Anemia Pathway; Regulation of HSF1-mediated heat shock response; Regulation of TP53 Activity through Phosphorylation; Activation of ATR in response to replication stress; Activation of the pre-replicative complex; Processing of DNA double-strand break ends; Presynaptic phase of homologous DNA pairing and strand exchange; G2/M DNA damage checkpoint; Termination of translesion DNA synthesis…
P02748	Complement component C9 [OS=Homo sapiens]	0.002	4.06	2	1	2	1	559	63.1	5.59	7.41	1	cell organization and biogenesis;stress response;other biological processes	non-structural extracellular;plasma membrane;other membranes;other cell component		Pf00057, Pf00090, Pf01823	735	ENSG00000113600	C9	hsa:735; P02748	Regulation of Complement cascade; Terminal pathway of complement
Q9UIQ6	Leucyl-cystinyl aminopeptidase [OS=Homo sapiens]	0.001	6.619	4	3	3	3	1025	117.3	5.73	7.06	3	cell-cell signaling;protein metabolism;other metabolic processes;signal transduction;other biological processes	non-structural extracellular;plasma membrane;other membranes;cytosol;other cytoplasmic organelle;other cell component	other molecular function	Pf01433, Pf11838, Pf17900	4012	ENSG00000113441	LNPEP	hsa:4012; O00769; Q15145; Q59H76; Q9TNQ2; Q9TNQ3; Q9UIQ6; Q9UIQ7	Antigen processing: Ubiquitination & Proteasome degradation; Endosomal/Vacuolar pathway; Translocation of SLC2A4 (GLUT4) to the plasma membrane
P10586	Receptor-type tyrosine-protein phosphatase F [OS=Homo sapiens]	0	18.138	4	5	6	5	1907	212.7	6.3	17.05	5	cell adhesion;cell organization and biogenesis;protein metabolism;other metabolic processes;stress response;developmental processes;signal transduction;other biological processes	plasma membrane;other membranes;other cell component	other molecular function	Pf00041, Pf00102, Pf07679	5792	ENSG00000142949	PTPRF	D3DPX6; D3DPX7; hsa:5792; P10586; Q5T021; Q5T022; Q5W9G2; Q86WS0	Insulin receptor recycling; Synaptic adhesion-like molecules; Receptor-type tyrosine-protein phosphatases
Q15056	Eukaryotic translation initiation factor 4H [OS=Homo sapiens]	0.002	4.035	8	2	3	2	248	27.4	7.23	5.93	2	cell organization and biogenesis;protein metabolism;other metabolic processes;other biological processes	cytosol;translational apparatus;other cell component	translation activity;nucleic acid binding activity	Pf00076	7458	ENSG00000106682	EIF4H	A8K3R1; D3DXF6; D3DXF8; hsa:7458; Q15056	L13a-mediated translational silencing of Ceruloplasmin expression; GTP hydrolysis and joining of the 60S ribosomal subunit; Translation initiation complex formation; Ribosomal scanning and start codon recognition
Q8N142	Adenylosuccinate synthetase isozyme 1 [OS=Homo sapiens]	0	8.282	9	3	4	1	457	50.2	8.59	10.89	3	other metabolic processes;other biological processes	cytosol;other cell component	other molecular function	Pf00709	122622	ENSG00000185100	ADSS1	hsa:122622; Q86TT6; Q8N142; Q8N714	Purine ribonucleoside monophosphate biosynthesis
P99999	Cytochrome c [OS=Homo sapiens]	0.001	5.174	14	1	2	1	105	11.7	9.57	10.84	1	protein metabolism;other metabolic processes;signal transduction;other biological processes	other membranes;cytosol;mitochondrion;nucleus	other molecular function	Pf00034	54205	ENSG00000172115	CYCS	A4D166; B2R4I1; hsa:54205; P00001; P99999; Q6NUR2; Q6NX69; Q96BV4	Respiratory electron transport; Detoxification of Reactive Oxygen Species; Transcriptional activation of mitochondrial biogenesis; TP53 Regulates Metabolic Genes; Cytoprotection by HMOX1; Activation of caspases through apoptosome-mediated cleavage; SMAC (DIABLO) binds to IAPs ; SMAC(DIABLO)-mediated dissociation of IAP:caspase complexes ; Regulation of the apoptosome activity; Release of apoptoti…
P0CW20	LIM and senescent cell antigen-like-containing domain protein 4 [OS=Homo sapiens]	0.002	3.978	14	1	1	1	117	13.2	5.49	4.67	1		other cell component	other molecular function	Pf00412	100288695; 96626	ENSG00000256671	LIMS4	C9K0W2; hsa:100288695; hsa:96626; P0CW20
Q99816	Tumor susceptibility gene 101 protein [OS=Homo sapiens]	0	14.422	12	3	5	3	390	43.9	6.46	19.09	3	cell cycle OR cell proliferation;cell organization and biogenesis;protein metabolism;RNA metabolism OR transcription;other metabolic processes;transport;other biological processes	non-structural extracellular;plasma membrane;other membranes;cytosol;cytoskeleton;nucleus;other cytoplasmic organelle;other cell component	nucleic acid binding activity;other molecular function	Pf05743, Pf09454	7251	ENSG00000074319	TSG101	hsa:7251; Q99816; Q9BUM5	HCMV Late Events; Budding and maturation of HIV virion; Membrane binding and targetting of GAG proteins; Endosomal Sorting Complex Required For Transport (ESCRT); Late endosomal microautophagy
Accession	Description	Exp. q-value: Combined	Sum PEP Score	Coverage [%]	# Peptides	# PSMs	# Unique Peptides	# AAs	MW [kDa]	calc. pI	Score Sequest HT: Sequest HT	# Peptides (by Search Engine): Sequest HT	Biological Process	Cellular Component	Molecular Function	Pfam IDs	Entrez Gene ID	Ensembl Gene ID	Gene Symbol	Gene ID	Reactome Pathways
Q16836	Hydroxyacyl-coenzyme A dehydrogenase, mitochondrial [OS=Homo sapiens]	0.009	2.286	3	1	1	1	314	34.3	8.85	2.6	1	other metabolic processes;other biological processes	mitochondrion;nucleus;other cell component	other molecular function	Pf00725, Pf02737	3033	ENSG00000138796	HADH	hsa:3033; J3KQ17; O00324; O00397; O00753; Q16836; Q4W5B4	Beta oxidation of decanoyl-CoA to octanoyl-CoA-CoA; Beta oxidation of octanoyl-CoA to hexanoyl-CoA; Beta oxidation of hexanoyl-CoA to butanoyl-CoA; Beta oxidation of butanoyl-CoA to acetyl-CoA; Beta oxidation of lauroyl-CoA to decanoyl-CoA-CoA
Q9BY76	Angiopoietin-related protein 4 [OS=Homo sapiens]	0.002	3.623	6	2	3	2	406	45.2	8.85	5.12	2	other metabolic processes;stress response;developmental processes;other biological processes	non-structural extracellular;extracellular matrix	signal transduction activity or receptor binding;enzyme regulator activity;other molecular function	Pf00147	51129	ENSG00000167772	ANGPTL4	A8MY84; B4E089; D6W670; F5H0I2; hsa:51129; Q53HQ6; Q53HU1; Q6UXN0; Q9BY76; Q9HBV4; Q9NZU4; Q9Y5B3	PPARA activates gene expression; Transcriptional regulation of white adipocyte differentiation; Assembly of active LPL and LIPC lipase complexes
Q92614	Unconventional myosin-XVIIIa [OS=Homo sapiens]	0	8.839	2	3	3	3	2054	233	6.3	8.13	3	cell organization and biogenesis;DNA metabolism;other metabolic processes;transport;other biological processes	other membranes;cytoskeleton;ER/Golgi;other cell component	cytoskeletal activity;nucleic acid binding activity;other molecular function	Pf00063, Pf01576, Pf17820	399687	ENSG00000196535	MYO18A	hsa:399687; Q5H9U3; Q5QD01; Q5W9F9; Q5W9G1; Q8IXP8; Q92614	Signaling by cytosolic FGFR1 fusion mutants; Signaling by FGFR1 in disease; Signaling by FLT3 fusion proteins
O75976	Carboxypeptidase D [OS=Homo sapiens]	0	10.224	3	3	3	3	1380	152.8	6.05	9.25	3	protein metabolism;other metabolic processes	non-structural extracellular;plasma membrane;other membranes	other molecular function	Pf00246, Pf13620	1362	ENSG00000108582	CPD	B7Z7T9; B7ZAU4; F5GZH6; hsa:1362; O15377; O75976; Q86SH9; Q86XE6	Golgi Associated Vesicle Biogenesis; RND3 GTPase cycle; RND1 GTPase cycle
O60264	SWI/SNF-related matrix-associated actin-dependent regulator of chromatin subfamily A member 5 [OS=Homo sapiens]	0.002	3.106	1	1	1	1	1052	121.8	8.09	3.37	1	cell organization and biogenesis;DNA metabolism;RNA metabolism OR transcription;other metabolic processes;stress response;other biological processes	nucleus;other cell component	nucleic acid binding activity;other molecular function	Pf00176, Pf00271, Pf09110, Pf09111	8467	ENSG00000153147	SMARCA5	hsa:8467; O60264	Deposition of new CENPA-containing nucleosomes at the centromere; B-WICH complex positively regulates rRNA expression; Recruitment and ATM-mediated phosphorylation of repair and signaling proteins at DNA double strand breaks; NoRC negatively regulates rRNA expression
O43684	Mitotic checkpoint protein BUB3 [OS=Homo sapiens]	0.002	4.24	3	1	1	1	328	37.1	6.84	3.46	1	cell cycle OR cell proliferation;signal transduction;other biological processes	cytosol;nucleus;other cell component	other molecular function	Pf00400	9184	ENSG00000154473	BUB3	A6NJ42; B2R6E7; D3DRE9; hsa:9184; O43684; O43685	Separation of Sister Chromatids; Resolution of Sister Chromatid Cohesion; RHO GTPases Activate Formins; EML4 and NUDC in mitotic spindle formation; Cdc20:Phospho-APC/C mediated degradation of Cyclin A; Amplification of signal from unattached kinetochores via a MAD2 inhibitory signal; Inactivation of APC/C via direct inhibition of the APC/C complex; APC/C:Cdc20 mediated degradation of mitotic prot…
Q71UM5	40S ribosomal protein S27-like [OS=Homo sapiens]	0	21.48	40	4	25	2	84	9.5	9.45	86.72	4	cell cycle OR cell proliferation;cell organization and biogenesis;protein metabolism;other metabolic processes;stress response;signal transduction;other biological processes	cytosol;translational apparatus;nucleus	enzyme regulator activity;nucleic acid binding activity;other molecular function	Pf01667	51065	ENSG00000185088	RPS27L	hsa:51065; Q71UM5; Q9BTJ1	Regulation of expression of SLITs and ROBOs; L13a-mediated translational silencing of Ceruloplasmin expression; Translation initiation complex formation; Formation of a pool of free 40S subunits; Formation of the ternary complex, and subsequently, the 43S complex; Ribosomal scanning and start codon recognition; GTP hydrolysis and joining of the 60S ribosomal subunit; Major pathway of rRNA process…
P04908	Histone H2A type 1-B/E [OS=Homo sapiens]	0	46.658	41	8	77	3	130	14.1	11.05	198.42	8	other biological processes	nucleus;other cell component	nucleic acid binding activity;other molecular function	Pf00125, Pf16211	3012; 8335	ENSG00000277075; ENSG00000278463	H2AC4; H2AC8	hsa:3012; hsa:8335; P04908; P28001; Q76P63	HCMV Early Events; Deposition of new CENPA-containing nucleosomes at the centromere; B-WICH complex positively regulates rRNA expression; NoRC negatively regulates rRNA expression; Amyloid fiber formation; Meiotic synapsis; HCMV Late Events; UCH proteinases; Ub-specific processing proteases; RUNX1 regulates transcription of genes involved in differentiation of HSCs; Transcriptional regulation by …
O60462	Neuropilin-2 [OS=Homo sapiens]	0.001	5.565	2	2	3	2	931	104.8	5.17	7.09	2	cell adhesion;cell organization and biogenesis;protein metabolism;other metabolic processes;developmental processes;signal transduction;other biological processes	non-structural extracellular;plasma membrane;other membranes;other cell component	kinase activity;other molecular function	Pf00431, Pf00629, Pf00754, Pf11980	8828	ENSG00000118257	NRP2	A0A024R3W6; A0A024R412; E9PF66; hsa:8828; O14820; O14821; O60462; Q53TQ4; Q53TS3; Q7LBX6; Q7LBX7; Q9H2D4; Q9H2D5; Q9H2E2; Q9H2E3; Q9H2E4; X5D2Q8	Neurophilin interactions with VEGF and VEGFR; NrCAM interactions
Q8WZA9	Immunity-related GTPase family Q protein [OS=Homo sapiens]	0.002	3.245	2	1	2	1	623	62.7	4.88	3.97	1			other molecular function		126298	ENSG00000167378	IRGQ	B2RNP3; hsa:126298; Q8WZA9
P62318	Small nuclear ribonucleoprotein Sm D3 [OS=Homo sapiens]	0	16.8	25	2	6	2	126	13.9	10.32	24.18	2	cell organization and biogenesis;protein metabolism;RNA metabolism OR transcription;other metabolic processes	cytosol;nucleus;other cell component	nucleic acid binding activity;other molecular function	Pf01423	6634	ENSG00000100028	SNRPD3	B4DJP7; B5BU13; hsa:6634; P43331; P62318	mRNA Splicing - Major Pathway; SARS-CoV-2 modulates host translation machinery; snRNP Assembly; RNA Polymerase II Transcription Termination; mRNA Splicing - Minor Pathway; SLBP independent Processing of Histone Pre-mRNAs; SLBP Dependent Processing of Replication-Dependent Histone Pre-mRNAs
Q9NUN5	Lysosomal cobalamin transport escort protein LMBD1 [OS=Homo sapiens]	0.001	4.88	3	1	3	1	540	61.3	7.77	9.86	1	transport;developmental processes;other biological processes	plasma membrane;other membranes;ER/Golgi;other cytoplasmic organelle;other cell component	signal transduction activity or receptor binding;transporter activity;other molecular function	Pf04791	55788	ENSG00000168216	LMBRD1	A8K204; E1P531; hsa:55788; Q5VUN6; Q86Y70; Q96FW4; Q9BY56; Q9NUN5; Q9NZD6	Defective ABCD4 causes MAHCJ; Uptake of dietary cobalamins into enterocytes; Transport of RCbl within the body
Q9NTK5	Obg-like ATPase 1 [OS=Homo sapiens]	0	10.194	10	3	7	3	396	44.7	7.81	19.47	3	other metabolic processes	non-structural extracellular;cytosol;cytoskeleton;nucleus;other cell component	translation activity;other molecular function	Pf01926, Pf06071	29789	ENSG00000138430	OLA1	D7EHM2; hsa:29789; Q5BJD7; Q8NCI8; Q96CU1; Q96SV2; Q9NTK5; Q9P1D3; Q9UNY9; Q9Y6G4	Platelet degranulation
Q96PU8	KH domain-containing RNA-binding protein QKI [OS=Homo sapiens]	0.005	2.579	2	1	1	1	341	37.6	8.56	2.46	1	RNA metabolism OR transcription;other metabolic processes;transport;developmental processes;other biological processes	nucleus;other cell component	nucleic acid binding activity;other molecular function	Pf00013, Pf16544, Pf16551	9444	ENSG00000112531	QKI	hsa:9444; Q2I375; Q5MJQ1; Q969L9; Q96EJ3; Q96KA3; Q96PU6; Q96PU7; Q96PU8; Q9P0X6; Q9P0X7; Q9P0X8; Q9P0X9; Q9P0Y0; Q9P0Y1	Signaling by BRAF and RAF1 fusions
Q9UNF1	Melanoma-associated antigen D2 [OS=Homo sapiens]	0.001	7.415	5	3	6	3	606	64.9	9.32	11.68	3	transport;other biological processes	non-structural extracellular;cytosol;nucleus;other cell component		Pf01454	10916	ENSG00000102316	MAGED2	A6NMX0; hsa:10916; O76058; Q5BJF3; Q8NAL6; Q9H218; Q9P0U9; Q9UM52; Q9UNF1	Platelet degranulation
Q9NQ29	Putative RNA-binding protein Luc7-like 1 [OS=Homo sapiens]	0	14.278	13	4	8	2	371	43.7	9.92	27.62	4	cell organization and biogenesis;RNA metabolism OR transcription;other metabolic processes;other biological processes	nucleus	nucleic acid binding activity;other molecular function	Pf03194	55692	ENSG00000007392	LUC7L	B8ZZ13; hsa:55692; Q96S32; Q9NPH4; Q9NQ29
P27708	CAD protein [OS=Homo sapiens]	0	16.496	3	5	7	5	2225	242.8	6.46	22.18	5	protein metabolism;other metabolic processes	cytosol;nucleus;other cell component	kinase activity;other molecular function	Pf00117, Pf00185, Pf00988, Pf01979, Pf02142, Pf02729, Pf02786, Pf02787	790	ENSG00000084774	CAD	D6W552; hsa:790; P27708; Q6P0Q0; Q96CK3	Pyrimidine biosynthesis
Q96K76	Ubiquitin carboxyl-terminal hydrolase 47 [OS=Homo sapiens]	0.009	2.311	1	1	1	1	1375	157.2	5.08	2.07	1	protein metabolism;DNA metabolism;other metabolic processes;stress response;signal transduction;other biological processes	cytosol;nucleus;other cell component	other molecular function	Pf00443, Pf19718	55031	ENSG00000170242	USP47	B3KXF5; E9PM46; hsa:55031; Q658U0; Q86Y73; Q8TEP6; Q96K76; Q9BWI0; Q9NWN1	Ub-specific processing proteases
P43246	DNA mismatch repair protein Msh2 [OS=Homo sapiens]	0.002	3.254	2	2	2	2	934	104.7	5.77	3.61	2	cell cycle OR cell proliferation;cell organization and biogenesis;DNA metabolism;other metabolic processes;stress response;developmental processes;signal transduction;other biological processes	nucleus	nucleic acid binding activity;other molecular function	Pf00488, Pf01624, Pf05188, Pf05190, Pf05192	4436	ENSG00000095002	MSH2	B4E2Z2; hsa:4436; O75488; P43246	TP53 Regulates Transcription of DNA Repair Genes; Mismatch repair (MMR) directed by MSH2:MSH6 (MutSalpha); Mismatch repair (MMR) directed by MSH2:MSH3 (MutSbeta); Defective Mismatch Repair Associated With MSH3; Defective Mismatch Repair Associated With MSH2; Defective Mismatch Repair Associated With MSH6
Q9Y3U8	60S ribosomal protein L36 [OS=Homo sapiens]	0	12.977	37	4	14	4	105	12.2	11.59	40.3	4	protein metabolism;other metabolic processes	cytosol;ER/Golgi;translational apparatus;nucleus	other molecular function	Pf01158	25873	ENSG00000130255	RPL36	B2R4Y1; D6W634; hsa:25873; Q6FIG1; Q9UQF6; Q9Y3U8	Regulation of expression of SLITs and ROBOs; Major pathway of rRNA processing in the nucleolus and cytosol; L13a-mediated translational silencing of Ceruloplasmin expression; Formation of a pool of free 40S subunits; GTP hydrolysis and joining of the 60S ribosomal subunit; Nonsense Mediated Decay (NMD) enhanced by the Exon Junction Complex (EJC); SRP-dependent cotranslational protein targeting to…
P24043	Laminin subunit alpha-2 [OS=Homo sapiens]	0	14.048	2	5	6	5	3122	343.7	6.4	8.57	5	cell adhesion;cell organization and biogenesis;developmental processes;other biological processes	non-structural extracellular;extracellular matrix;plasma membrane;other membranes;other cell component	signal transduction activity or receptor binding;extracellular structural activity;other molecular function	Pf00052, Pf00053, Pf00054, Pf00055, Pf06008, Pf06009	3908	ENSG00000196569	LAMA2	hsa:3908; P24043; Q14736; Q5VUM2; Q93022	ECM proteoglycans; Non-integrin membrane-ECM interactions; Laminin interactions; MET activates PTK2 signaling; EGR2 and SOX10-mediated initiation of Schwann cell myelination
Q15020	Squamous cell carcinoma antigen recognized by T-cells 3 [OS=Homo sapiens]	0	14.742	4	3	3	3	963	109.9	5.57	13.01	3	cell cycle OR cell proliferation;cell organization and biogenesis;RNA metabolism OR transcription;other metabolic processes;other biological processes	nucleus;other cell component	nucleic acid binding activity;other molecular function	Pf00076, Pf05391, Pf16605	9733	ENSG00000075856	SART3	A8K2E4; B7ZKM0; hsa:9733; Q15020; Q2M2H0; Q58F06; Q8IUS1; Q96J95
P33992	DNA replication licensing factor MCM5 [OS=Homo sapiens]	0.001	5.718	4	2	2	2	734	82.2	8.37	5.66	2	cell cycle OR cell proliferation;cell organization and biogenesis;DNA metabolism;other metabolic processes;stress response;other biological processes	nucleus;other cell component	nucleic acid binding activity;other molecular function	Pf00493, Pf14551, Pf17207, Pf17855	4174	ENSG00000100297	MCM5	hsa:4174; O60785; P33992; Q14578; Q9BTJ4; Q9BWL8	Orc1 removal from chromatin; Assembly of the pre-replicative complex; Activation of ATR in response to replication stress; Activation of the pre-replicative complex; Unwinding of DNA
Q9UMR2	ATP-dependent RNA helicase DDX19B [OS=Homo sapiens]	0.001	5.304	4	2	2	2	479	53.9	6.3	5.33	2	other metabolic processes;transport	nucleus;other cell component	nucleic acid binding activity;other molecular function	Pf00270, Pf00271	11269	ENSG00000157349	DDX19B	B3KNE9; B4DXS6; E7EMK4; hsa:11269; Q6FIB7; Q6IAE0; Q96KE7; Q9H0U0; Q9UMR2
P05109	Protein S100-A8 [OS=Homo sapiens]	0	9.218	33	3	3	3	93	10.8	7.03	7.04	3	cell adhesion;cell-cell signaling;protein metabolism;other metabolic processes;stress response;transport;developmental processes;other biological processes	non-structural extracellular;plasma membrane;other membranes;cytosol;cytoskeleton;other cell component	signal transduction activity or receptor binding;cytoskeletal activity;other molecular function	Pf01023	6279	ENSG00000143546	S100A8	A8K5L3; D3DV37; hsa:6279; P05109; Q5SY70; Q9UC84; Q9UC92; Q9UCJ0; Q9UCM6	Neutrophil degranulation; ER-Phagosome pathway; MyD88:MAL(TIRAP) cascade initiated on plasma membrane; MyD88 deficiency (TLR2/4); IRAK4 deficiency (TLR2/4); Regulation of TLR by endogenous ligand; Metal sequestration by antimicrobial proteins; RHO GTPases Activate NADPH Oxidases
Q99538	Legumain [OS=Homo sapiens]	0	9.198	6	4	5	4	433	49.4	6.55	10.85	4	cell organization and biogenesis;protein metabolism;other metabolic processes;other biological processes	non-structural extracellular;other cytoplasmic organelle;other cell component	cytoskeletal activity;other molecular function	Pf01650	5641	ENSG00000100600	LGMN	hsa:5641; O00123; Q86TV2; Q86TV3; Q99538; Q9BTY1	MHC class II antigen presentation; Trafficking and processing of endosomal TLR; Vitamin D (calciferol) metabolism
P53634	Dipeptidyl peptidase 1 [OS=Homo sapiens]	0	25.466	12	6	13	6	463	51.8	6.99	38.06	6	protein metabolism;other metabolic processes;other biological processes	non-structural extracellular;other membranes;cytoskeleton;ER/Golgi;nucleus;other cytoplasmic organelle;other cell component	enzyme regulator activity;other molecular function	Pf00112, Pf08773	1075	ENSG00000109861	CTSC	A8K7V2; B5MDD5; hsa:1075; P53634; Q2HIY8; Q53G93; Q71E75; Q71E76; Q7M4N9; Q7Z3G7; Q7Z5U7; Q8WY99; Q8WYA7; Q8WYA8	MHC class II antigen presentation; Neutrophil degranulation; COPII-mediated vesicle transport; Cargo concentration in the ER
O43324	Eukaryotic translation elongation factor 1 epsilon-1 [OS=Homo sapiens]	0.002	4.323	10	2	2	2	174	19.8	8.54	6.33	2	protein metabolism;other metabolic processes;other biological processes	cytosol;nucleus;other cell component		Pf00043	9521	ENSG00000124802	EEF1E1	C9JLK5; hsa:9521; O43324; Q5THS2	Selenoamino acid metabolism; Cytosolic tRNA aminoacylation
Q6UWH4	Golgi-associated kinase 1B [OS=Homo sapiens]	0.003	2.958	4	2	3	2	519	57.5	9.7	2.6	2		other membranes;ER/Golgi		Pf15051	51313	ENSG00000164125	GASK1B	hsa:51313; Q498Z3; Q6IAF9; Q6UWH4; Q6ZMF2; Q86XL0
P20700	Lamin-B1 [OS=Homo sapiens]	0	13.503	9	5	8	4	586	66.4	5.16	20.86	5	cell organization and biogenesis;transport;other biological processes	other membranes;cytoskeleton;nucleus	cytoskeletal activity;nucleic acid binding activity;other molecular function	Pf00038, Pf00932	4001	ENSG00000113368	LMNB1	B2R6J6; hsa:4001; P20700; Q3SYN7; Q96EI6	Gene and protein expression by JAK-STAT signaling after Interleukin-12 stimulation; Meiotic synapsis; RHOD GTPase cycle; RHOF GTPase cycle; Deregulated CDK5 triggers multiple neurodegenerative pathways in Alzheimer's disease models; Initiation of Nuclear Envelope (NE) Reformation; Depolymerisation of the Nuclear Lamina; Breakdown of the nuclear lamina; Formation of Senescence-Associated Heterochr…
Q6UXH8	Collagen and calcium-binding EGF domain-containing protein 1 [OS=Homo sapiens]	0	10.634	11	4	4	4	406	44.1	7.58	10.21	4	developmental processes;other biological processes	non-structural extracellular;extracellular matrix;other cell component	other molecular function	Pf01391, Pf07645	147372	ENSG00000183287	CCBE1	hsa:147372; Q6MZX5; Q6UXH8; Q86SS2; Q8TF19
Q14533	Keratin, type II cuticular Hb1 [OS=Homo sapiens]	0.001	5.274	3	2	11	1	505	54.9	5.47	22.72	2	cell organization and biogenesis;other biological processes	cytosol;cytoskeleton	bone, tooth or skin structural activity	Pf00038, Pf16208	3887	ENSG00000205426	KRT81	hsa:3887; Q14533; Q14846; Q16274; Q17R48; Q8WU52; Q9BR74	Formation of the cornified envelope
Q96A65	Exocyst complex component 4 [OS=Homo sapiens]	0	9.728	4	3	5	3	974	110.4	6.49	14.69	3	cell-cell signaling;cell cycle OR cell proliferation;cell organization and biogenesis;transport;developmental processes;other biological processes	plasma membrane;other membranes;cytosol;cytoskeleton;other cell component	other molecular function	Pf04048	60412	ENSG00000131558	EXOC4	E9PED2; hsa:60412; Q541U8; Q96A65; Q9C0G4; Q9H9K0; Q9P102	Insulin processing; Translocation of SLC2A4 (GLUT4) to the plasma membrane; VxPx cargo-targeting to cilium
P52926	High mobility group protein HMGI-C [OS=Homo sapiens]	0.002	4.044	19	2	2	2	109	11.8	10.62	5.06	2	cell-cell signaling;cell cycle OR cell proliferation;cell organization and biogenesis;DNA metabolism;RNA metabolism OR transcription;other metabolic processes;stress response;developmental processes;signal transduction;other biological processes	nucleus;other cell component	nucleic acid binding activity;other molecular function	Pf02178	8091	ENSG00000149948	HMGA2	E7EP85; E7EWA2; hsa:8091; P52926; Q1M182; Q1M185; Q1M186; Q1M187; Q1M188	Formation of Senescence-Associated Heterochromatin Foci (SAHF)
O75146	Huntingtin-interacting protein 1-related protein [OS=Homo sapiens]	0	11.911	4	4	4	4	1068	119.3	6.67	11.67	4	cell organization and biogenesis;transport;developmental processes;other biological processes	plasma membrane;other membranes;cytosol;cytoskeleton;mitochondrion;other cell component	cytoskeletal activity;other molecular function	Pf01608, Pf07651, Pf16515	9026	ENSG00000130787	HIP1R	A6NHQ6; hsa:9026; O75146; Q6NXG8; Q9UED9	Clathrin-mediated endocytosis; Golgi Associated Vesicle Biogenesis
P21926	CD9 antigen [OS=Homo sapiens]	0	19.736	18	7	18	7	228	25.4	7.15	53.15	7	cell adhesion;cell cycle OR cell proliferation;cell organization and biogenesis;stress response;transport;developmental processes;other biological processes	non-structural extracellular;plasma membrane;other membranes;other cell component	signal transduction activity or receptor binding	Pf00335	928	ENSG00000010278	CD9	D3DUQ9; hsa:928; P21926; Q5J7W6; Q96ES4	Platelet degranulation ; Uptake and function of diphtheria toxin; Acrosome Reaction and Sperm:Oocyte Membrane Binding
P09874	Poly [ADP-ribose] polymerase 1 [OS=Homo sapiens]	0.001	4.499	2	2	2	2	1014	113	8.88	4.36	2	cell organization and biogenesis;protein metabolism;DNA metabolism;RNA metabolism OR transcription;other metabolic processes;stress response;signal transduction;other biological processes	cytosol;mitochondrion;nucleus;other cell component	nucleic acid binding activity;other molecular function	Pf00533, Pf00644, Pf00645, Pf02877, Pf05406, Pf08063	142	ENSG00000143799	PARP1	B1ANJ4; hsa:142; P09874; Q8IUZ9	SUMOylation of DNA damage response and repair proteins; Downregulation of SMAD2/3:SMAD4 transcriptional activity; HDR through MMEJ (alt-NHEJ); Formation of Incision Complex in GG-NER; DNA Damage Recognition in GG-NER; vRNA Synthesis; POLB-Dependent Long Patch Base Excision Repair; Dual Incision in GG-NER
Q9HAV4	Exportin-5 [OS=Homo sapiens]	0.007	2.417	1	1	1	1	1204	136.2	5.8	2.14	1	RNA metabolism OR transcription;transport;other biological processes	cytosol;nucleus;other cell component	nucleic acid binding activity;other molecular function	Pf08389, Pf19273	57510	ENSG00000124571	XPO5	hsa:57510; Q5JTE6; Q96G48; Q96HN3; Q9BWM6; Q9BZV5; Q9H9M4; Q9HAV4; Q9NT89; Q9NW39; Q9ULC9	MicroRNA (miRNA) biogenesis
Q92824	Proprotein convertase subtilisin/kexin type 5 [OS=Homo sapiens]	0.001	5.646	1	2	2	2	1860	206.8	6.1	4.68	2	cell-cell signaling;protein metabolism;other metabolic processes;transport;developmental processes;other biological processes	non-structural extracellular;other membranes;ER/Golgi	other molecular function	Pf00082, Pf01483, Pf14843, Pf16470	5125	ENSG00000099139	PCSK5	F5H2G7; hsa:5125; Q13527; Q92824; Q96EP4	Assembly of active LPL and LIPC lipase complexes; NGF processing
P07998	Ribonuclease pancreatic [OS=Homo sapiens]	0.001	5.22	5	1	4	1	156	17.6	8.79	9.39	1	RNA metabolism OR transcription;other metabolic processes;stress response		nucleic acid binding activity;other molecular function	Pf00074	6035	ENSG00000129538	RNASE1	B2R589; D3DS06; hsa:6035; P07998; Q16830; Q16869; Q1KHR2; Q6ICS5; Q9UCB4; Q9UCB5	Late endosomal microautophagy; Chaperone Mediated Autophagy
Q09328	Alpha-1,6-mannosylglycoprotein 6-beta-N-acetylglucosaminyltransferase A [OS=Homo sapiens]	0	10.52	6	4	6	4	741	84.5	8.12	14.44	4	protein metabolism;other metabolic processes;other biological processes	other membranes;ER/Golgi	enzyme regulator activity;other molecular function	Pf15024, Pf15027	4249	ENSG00000152127	MGAT5	D3DP70; hsa:4249; Q09328	N-Glycan antennae elongation; Maturation of spike protein
O43172	U4/U6 small nuclear ribonucleoprotein Prp4 [OS=Homo sapiens]	0	8.913	8	3	4	3	522	58.4	7.42	8.94	3	RNA metabolism OR transcription;other metabolic processes	nucleus	nucleic acid binding activity	Pf00400, Pf08799	9128	ENSG00000136875	PRPF4	hsa:9128; O43172; O43445; O43864; Q5T1M8; Q96DG2; Q96IK4	mRNA Splicing - Major Pathway
Q8NI27	THO complex subunit 2 [OS=Homo sapiens]	0.007	2.492	1	1	1	1	1593	182.7	8.44	2.64	1	RNA metabolism OR transcription;other metabolic processes;transport;developmental processes;other biological processes	nucleus	nucleic acid binding activity	Pf11262, Pf11732, Pf16134	57187	ENSG00000125676	THOC2	A6NM50; hsa:57187; Q5JZ12; Q6IN92; Q8NI27; Q9H8I6	Transport of Mature mRNA derived from an Intron-Containing Transcript; mRNA 3'-end processing; RNA Polymerase II Transcription Termination
Q9NWB6	Arginine and glutamate-rich protein 1 [OS=Homo sapiens]	0.002	4.273	5	2	2	2	273	33.2	10.35	4.15	2		cytosol;mitochondrion;nucleus		Pf15346	55082	ENSG00000134884	ARGLU1	B4E0Y3; hsa:55082; Q5T257; Q6IQ34; Q9NWB6
P51151	Ras-related protein Rab-9A [OS=Homo sapiens]	0.002	3.853	7	1	2	1	201	22.8	5.47	6.51	1	transport;signal transduction;other biological processes	plasma membrane;other membranes;cytosol;ER/Golgi;other cytoplasmic organelle;other cell component	other molecular function	Pf00071	9367	ENSG00000123595	RAB9A	A8K390; hsa:9367; P51151; Q6ICN1	RAB geranylgeranylation; RAB GEFs exchange GTP for GDP on RABs; Retrograde transport at the Trans-Golgi-Network; RHOBTB3 ATPase cycle
Q92896	Golgi apparatus protein 1 [OS=Homo sapiens]	0	12.644	4	3	4	3	1179	134.5	6.9	16.53	3	protein metabolism;other metabolic processes;developmental processes;signal transduction;other biological processes	extracellular matrix;plasma membrane;other membranes;cytoskeleton;ER/Golgi	signal transduction activity or receptor binding;other molecular function	Pf00839	2734	ENSG00000090863	GLG1	B7Z8Y4; D3DUJ7; hsa:2734; Q13221; Q6P9D1; Q92896	Cell surface interactions at the vascular wall
Q9Y316	Protein MEMO1 [OS=Homo sapiens]	0.001	4.485	4	1	1	1	297	33.7	7.14	3.54	1	other biological processes			Pf01875	51072	ENSG00000162959	MEMO1	B4DLS0; D6W575; hsa:51072; Q5R2V8; Q5R2V9; Q6NSL5; Q9Y316	ERBB2 Regulates Cell Motility
P61966	AP-1 complex subunit sigma-1A [OS=Homo sapiens]	0	8.913	10	1	3	1	158	18.7	5.73	10.17	1	cell organization and biogenesis;transport;other biological processes	plasma membrane;other membranes;cytosol;ER/Golgi;other cytoplasmic organelle;other cell component	other molecular function	Pf01217	1174	ENSG00000106367	AP1S1	B2R5D8; hsa:1174; P61966; P82267; Q00382; Q53YA7; Q9BTN4; Q9UDW9	Golgi Associated Vesicle Biogenesis; MHC class II antigen presentation; Lysosome Vesicle Biogenesis; Nef mediated downregulation of MHC class I complex cell surface expression
P84095	Rho-related GTP-binding protein RhoG [OS=Homo sapiens]	0.002	3.882	10	1	2	1	191	21.3	8.12	7.8	1	cell organization and biogenesis;transport;developmental processes;signal transduction;other biological processes	plasma membrane;other membranes;cytosol;cytoskeleton;ER/Golgi;other cell component	other molecular function	Pf00071	391	ENSG00000177105	RHOG	hsa:391; P35238; P84095; Q8NI04	RHOG GTPase cycle; Neutrophil degranulation; PIP3 activates AKT signaling; Constitutive Signaling by Aberrant PI3K in Cancer; PI5P, PP2A and IER3 Regulate PI3K/AKT Signaling; GPVI-mediated activation cascade; RHO GTPases activate KTN1
P78423	Fractalkine [OS=Homo sapiens]	0.004	2.754	4	2	2	2	397	42.2	6.52	4.79	2	cell adhesion;cell-cell signaling;cell cycle OR cell proliferation;cell organization and biogenesis;stress response;developmental processes;signal transduction;other biological processes	non-structural extracellular;plasma membrane;other membranes;other cell component	signal transduction activity or receptor binding	Pf00048	6376	ENSG00000006210	CX3CL1	hsa:6376; O00672; P78423	G alpha (i) signalling events; Chemokine receptors bind chemokines
P01833	Polymeric immunoglobulin receptor [OS=Homo sapiens]	0.003	2.965	2	1	1	1	764	83.2	5.74	2.68	1	transport;signal transduction;other biological processes	non-structural extracellular;plasma membrane;other membranes;other cytoplasmic organelle;other cell component	other molecular function	Pf07686	5284	ENSG00000162896	PIGR	hsa:5284; P01833; Q68D81; Q8IZY7	Neutrophil degranulation
Q9NZH0	G-protein coupled receptor family C group 5 member B [OS=Homo sapiens]	0.002	3.1	3	1	3	1	403	44.8	8.24	4.37	1	signal transduction;other biological processes	non-structural extracellular;plasma membrane;other membranes;cytosol;nucleus;other cell component	signal transduction activity or receptor binding;enzyme regulator activity;other molecular function	Pf00003	51704	ENSG00000167191	GPRC5B	D2DFB0; hsa:51704; O75205; Q8NBZ8; Q9NZH0
Q15018	BRISC complex subunit Abraxas 2 [OS=Homo sapiens]	0	8.4	10	3	3	3	415	46.9	6.21	8.59	3	cell cycle OR cell proliferation;cell organization and biogenesis;protein metabolism;other metabolic processes;stress response;other biological processes	cytosol;cytoskeleton;nucleus;other cell component	cytoskeletal activity;other molecular function		23172	ENSG00000165660	ABRAXAS2	B4DKR2; hsa:23172; Q15018; Q96H11	Metalloprotease DUBs
Q15643	Thyroid receptor-interacting protein 11 [OS=Homo sapiens]	0.002	3.915	1	1	1	1	1979	227.4	5.26	3.21	1	cell organization and biogenesis;protein metabolism;RNA metabolism OR transcription;other metabolic processes;transport;developmental processes	other membranes;cytoskeleton;ER/Golgi;nucleus	other molecular function		9321	ENSG00000100815	TRIP11	B2RUT2; hsa:9321; O14689; O15154; O95949; Q15643; Q6MZL5	Intraflagellar transport; Intra-Golgi traffic; Signaling by FLT3 fusion proteins
Q709C8	Intermembrane lipid transfer protein VPS13C [OS=Homo sapiens]	0	25.505	3	10	13	10	3753	422.1	6.83	31.17	10	cell organization and biogenesis;transport;other biological processes	other membranes;cytosol;mitochondrion;ER/Golgi;other cytoplasmic organelle;other cell component		Pf06650, Pf09333, Pf12624, Pf16908, Pf16909, Pf16910	54832	ENSG00000129003	VPS13C	hsa:54832; Q6ISR4; Q702P2; Q702P3; Q709C8; Q709C9; Q9NXN8; Q9P2C6
P35573	Glycogen debranching enzyme [OS=Homo sapiens]	0.001	4.69	1	2	2	2	1532	174.7	6.76	2.02	2	other metabolic processes;other biological processes	non-structural extracellular;cytosol;ER/Golgi;nucleus;other cell component	other molecular function	Pf06202, Pf14699, Pf14701, Pf14702	178	ENSG00000162688	AGL	A6NCX7; A6NEK2; D3DT51; hsa:178; P35573; P78354; P78544; Q59H92; Q6AZ90; Q9UF08	Neutrophil degranulation; Glycogen breakdown (glycogenolysis)
Q9NYK5	39S ribosomal protein L39, mitochondrial [OS=Homo sapiens]	0.002	3.747	4	1	1	1	338	38.7	7.65	3.3	1	protein metabolism;other metabolic processes	other membranes;mitochondrion;translational apparatus	other molecular function		54148	ENSG00000154719	MRPL39	C9JYA5; hsa:54148; Q32Q74; Q5QTR3; Q96Q65; Q9BSQ7; Q9BZV6; Q9NX44; Q9NYK5	Mitochondrial translation initiation; Mitochondrial translation elongation; Mitochondrial translation termination
Q92743	Serine protease HTRA1 [OS=Homo sapiens]	0	26.663	16	8	13	8	480	51.3	7.83	27.32	8	protein metabolism;other biological processes	non-structural extracellular;plasma membrane;other membranes;cytosol	other molecular function	Pf00219, Pf02163, Pf07648, Pf13365, Pf17820	5654	ENSG00000166033	HTRA1	D3DRE4; hsa:5654; Q92743; Q9UNS5	Degradation of the extracellular matrix
P63241	Eukaryotic translation initiation factor 5A-1 [OS=Homo sapiens]	0	8.781	23	3	4	3	154	16.8	5.24	9.37	3	protein metabolism;other metabolic processes;signal transduction;other biological processes	other membranes;cytosol;ER/Golgi;nucleus;other cell component	translation activity;nucleic acid binding activity	Pf01287	1984	ENSG00000132507; ENSG00000288145	EIF5A	A8K9A0; D3DTP2; hsa:1984; P10159; P63241; Q16182; Q7L7L3; Q7Z4L1; Q9D0G2	Hypusine synthesis from eIF5A-lysine
Q96DA0	Zymogen granule protein 16 homolog B [OS=Homo sapiens]	0.001	5.326	8	1	1	1	208	22.7	7.39	6	1			other molecular function	Pf01419	124220	ENSG00000162078; ENSG00000283056	ZG16B	A6NIY1; B2R4F6; hsa:124220; Q6UW28; Q96DA0
P53992	Protein transport protein Sec24C [OS=Homo sapiens]	0	19.225	6	5	9	5	1094	118.2	7.06	28.14	5	cell organization and biogenesis;transport;developmental processes	other membranes;cytosol;ER/Golgi	other molecular function	Pf00626, Pf04810, Pf04811, Pf04815, Pf08033	9632	ENSG00000176986	SEC24C	B4DZT4; hsa:9632; P53992; Q8WV25	COPII-mediated vesicle transport; MHC class II antigen presentation; SARS-CoV-2 activates/modulates innate and adaptive immune responses; Cargo concentration in the ER; Regulation of cholesterol biosynthesis by SREBP (SREBF); Antigen Presentation: Folding, assembly and peptide loading of class I MHC
P52597	Heterogeneous nuclear ribonucleoprotein F [OS=Homo sapiens]	0	18.168	20	5	10	4	415	45.6	5.58	32.27	5	RNA metabolism OR transcription;other metabolic processes;other biological processes	plasma membrane;other membranes;cytosol;nucleus;other cell component	nucleic acid binding activity	Pf00076, Pf08080	3185	ENSG00000169813	HNRNPF	B3KM84; hsa:3185; P52597; Q5T0N2; Q96AU2	mRNA Splicing - Major Pathway; Gene and protein expression by JAK-STAT signaling after Interleukin-12 stimulation; FGFR2 alternative splicing; Processing of Capped Intron-Containing Pre-mRNA
Q9NV70	Exocyst complex component 1 [OS=Homo sapiens]	0.001	6.479	2	2	2	2	894	101.9	6.61	5.52	2	cell cycle OR cell proliferation;cell organization and biogenesis;stress response;transport;signal transduction;other biological processes	plasma membrane;other membranes;cytosol;other cell component	other molecular function	Pf09763, Pf15277	55763	ENSG00000090989	EXOC1	hsa:55763; Q504V4; Q8WUE7; Q96T15; Q9NV70; Q9NZE4	Translocation of SLC2A4 (GLUT4) to the plasma membrane; Insulin processing; VxPx cargo-targeting to cilium
Q92747	Actin-related protein 2/3 complex subunit 1A [OS=Homo sapiens]	0.004	2.741	2	1	2	1	370	41.5	8.18	5.85	1	cell organization and biogenesis	plasma membrane;other membranes;cytosol;cytoskeleton;nucleus;other cell component	cytoskeletal activity	Pf00400	10552	ENSG00000241685	ARPC1A	A4D276; B4DLQ7; D6W5S1; hsa:10552; Q7Z5U8; Q86WU5; Q8IXQ0; Q92747	Regulation of actin dynamics for phagocytic cup formation; FCGR3A-mediated phagocytosis; Clathrin-mediated endocytosis; RHO GTPases Activate WASPs and WAVEs; EPHB-mediated forward signaling
Q15172	Serine/threonine-protein phosphatase 2A 56 kDa regulatory subunit alpha isoform [OS=Homo sapiens]	0.002	3.081	3	1	2	1	486	56.2	6.71	4.78	1	protein metabolism;other metabolic processes;signal transduction;other biological processes	other membranes;cytosol;cytoskeleton;nucleus;other cell component	enzyme regulator activity;other molecular function	Pf01603	5525	ENSG00000066027	PPP2R5A	B2R6D2; B7Z7L2; D3DT99; hsa:5525; Q15172; Q2NL72; Q5VVB2; Q8TBI9	Separation of Sister Chromatids; Resolution of Sister Chromatid Cohesion; RHO GTPases Activate Formins; EML4 and NUDC in mitotic spindle formation; Amplification of signal from unattached kinetochores via a MAD2 inhibitory signal; PI5P, PP2A and IER3 Regulate PI3K/AKT Signaling; Disassembly of the destruction complex and recruitment of AXIN to the membrane; RAF activation; Beta-catenin phosphoryl…
Q00796	Sorbitol dehydrogenase [OS=Homo sapiens]	0.001	5.108	7	2	4	2	357	38.3	7.97	12.32	2	other metabolic processes;stress response;other biological processes	non-structural extracellular;other membranes;cytosol;cytoskeleton;mitochondrion	other molecular function	Pf00107, Pf08240	6652	ENSG00000140263	SORD	B2R655; B7Z3A6; hsa:6652; J3JZZ5; Q00796; Q16682; Q9UMD6	Formation of xylulose-5-phosphate; Fructose biosynthesis
Q9NSC5	Homer protein homolog 3 [OS=Homo sapiens]	0.002	4.032	4	1	1	1	361	39.8	5.45	2.17	1	transport;signal transduction;other biological processes	plasma membrane;other membranes;cytosol;other cell component	signal transduction activity or receptor binding;other molecular function	Pf00568	9454	ENSG00000051128	HOMER3	B2RA10; E9PCW9; hsa:9454; O14580; O95350; Q9NSB9; Q9NSC0; Q9NSC1; Q9NSC5	Neurexins and neuroligins
Q16394	Exostosin-1 [OS=Homo sapiens]	0.002	3.396	1	1	1	1	746	86.2	9.04	3.13	1	cell adhesion;cell-cell signaling;cell cycle OR cell proliferation;cell organization and biogenesis;protein metabolism;other metabolic processes;stress response;transport;developmental processes;signal transduction;other biological processes	other membranes;ER/Golgi;other cell component	other molecular function	Pf03016, Pf09258	2131	ENSG00000182197	EXT1	B2R7V2; hsa:2131; Q16394; Q9BVI9	HS-GAG biosynthesis; Defective EXT2 causes exostoses 2; Defective EXT1 causes exostoses 1, TRPS2 and CHDS
P55084	Trifunctional enzyme subunit beta, mitochondrial [OS=Homo sapiens]	0.002	3.49	2	1	2	1	474	51.3	9.41	5.6	1	other metabolic processes;other biological processes	other membranes;mitochondrion;ER/Golgi	nucleic acid binding activity;other molecular function	Pf00108, Pf02803	3032	ENSG00000138029	HADHB	B2RB16; B4E2W0; hsa:3032; O14969; P55084; Q53TA6; Q96C77; Q9H3F5; Q9T2V8	Acyl chain remodeling of CL; mitochondrial fatty acid beta-oxidation of unsaturated fatty acids; Beta oxidation of decanoyl-CoA to octanoyl-CoA-CoA; Beta oxidation of octanoyl-CoA to hexanoyl-CoA; Beta oxidation of hexanoyl-CoA to butanoyl-CoA; Beta oxidation of myristoyl-CoA to lauroyl-CoA; Beta oxidation of lauroyl-CoA to decanoyl-CoA-CoA; Beta oxidation of palmitoyl-CoA to myristoyl-CoA
P51858	Hepatoma-derived growth factor [OS=Homo sapiens]	0.001	7.375	11	2	4	2	240	26.8	4.73	9.65	2	RNA metabolism OR transcription;signal transduction;other biological processes	nucleus;other cell component	signal transduction activity or receptor binding;cytoskeletal activity;nucleic acid binding activity;other molecular function	Pf00855	3068	ENSG00000143321	HDGF	B3KU21; D3DVC9; hsa:3068; P51858; Q5SZ07; Q5SZ08; Q5SZ09	XBP1(S) activates chaperone genes
Q9BS26	Endoplasmic reticulum resident protein 44 [OS=Homo sapiens]	0	12.295	11	4	11	3	406	46.9	5.26	28.1	4	protein metabolism;other metabolic processes;stress response;other biological processes	non-structural extracellular;other membranes;ER/Golgi;other cell component	other molecular function	Pf00085, Pf13848	23071	ENSG00000023318	ERP44	hsa:23071; O60319; Q4VXC1; Q5VWZ7; Q6UW14; Q8WX67; Q9BS26	Neutrophil degranulation
P12004	Proliferating cell nuclear antigen [OS=Homo sapiens]	0	16.387	20	5	7	5	261	28.8	4.69	20.87	5	cell cycle OR cell proliferation;cell organization and biogenesis;DNA metabolism;other metabolic processes;stress response;developmental processes;other biological processes	cytoskeleton;nucleus;other cell component	signal transduction activity or receptor binding;enzyme regulator activity;nucleic acid binding activity;other molecular function	Pf00705, Pf02747	5111	ENSG00000132646	PCNA	B2R897; D3DW02; hsa:5111; P12004	E3 ubiquitin ligases ubiquitinate target proteins; SUMOylation of DNA replication proteins; Termination of translesion DNA synthesis; TP53 Regulates Transcription of Genes Involved in G2 Cell Cycle Arrest; HDR through Homologous Recombination (HRR); Dual incision in TC-NER; Gap-filling DNA repair synthesis and ligation in TC-NER; Translesion synthesis by REV1; Translesion synthesis by POLK; Trans…
Q92696	Geranylgeranyl transferase type-2 subunit alpha [OS=Homo sapiens]	0.001	5.425	4	2	3	2	567	65	5.67	8.82	2	protein metabolism;other metabolic processes;other biological processes	plasma membrane;other membranes;cytosol;other cell component	other molecular function	Pf01239, Pf07711	5875	ENSG00000100949; ENSG00000285193	RABGGTA	A8K5N2; D3DS69; hsa:5875; Q92696	RAB geranylgeranylation; TP53 regulates transcription of several additional cell death genes whose specific roles in p53-dependent apoptosis remain uncertain
Q13616	Cullin-1 [OS=Homo sapiens]	0.001	4.914	2	2	4	2	776	89.6	8	9.52	2	cell cycle OR cell proliferation;protein metabolism;other metabolic processes;signal transduction;other biological processes	plasma membrane;other membranes;cytosol;nucleus;other cell component	other molecular function	Pf00888, Pf10557	8454	ENSG00000055130	CUL1	D3DWG3; hsa:8454; O60719; Q08AL6; Q13616; Q8IYW1	Neddylation; Iron uptake and transport; Nuclear events stimulated by ALK signaling in cancer; FCERI mediated NF-kB activation; Constitutive Signaling by NOTCH1 PEST Domain Mutants; Constitutive Signaling by NOTCH1 HD+PEST Domain Mutants; Regulation of PLK1 Activity at G2/M Transition; Circadian Clock; Downstream TCR signaling; Antigen processing: Ubiquitination & Proteasome degradation; Activatio…
Q15417	Calponin-3 [OS=Homo sapiens]	0.001	5.678	7	2	2	2	329	36.4	6.05	4.31	2	cell organization and biogenesis;other biological processes	cytosol;cytoskeleton	cytoskeletal activity;other molecular function	Pf00307, Pf00402	1266	ENSG00000117519	CNN3	B4DFK6; B4DP09; F8WA86; hsa:1266; Q15417; Q6FHA7
P36955	Pigment epithelium-derived factor [OS=Homo sapiens]	0	11.167	9	3	4	3	418	46.3	6.38	9.91	3	cell cycle OR cell proliferation;developmental processes;other biological processes	non-structural extracellular;extracellular matrix;other cell component	enzyme regulator activity	Pf00079	5176	ENSG00000132386	SERPINF1	F1T092; hsa:5176; P36955; Q13236; Q2TU83; Q96CT1; Q96R01; Q9BWA4
Q86SQ4	Adhesion G-protein coupled receptor G6 [OS=Homo sapiens]	0.001	4.72	2	2	2	2	1221	136.6	7.87	6.46	2	developmental processes;signal transduction	plasma membrane;other membranes;ER/Golgi;other cell component	other molecular function	Pf00002, Pf00354, Pf00431, Pf01825	57211	ENSG00000112414	ADGRG6	hsa:57211; Q5TGN7; Q6DHZ4; Q6F3F5; Q6F3F6; Q6F3F7; Q6F3F8; Q6MZU7; Q86SQ4; Q8IXA4; Q8NC14; Q96JW0	EGR2 and SOX10-mediated initiation of Schwann cell myelination
P13646	Keratin, type I cytoskeletal 13 [OS=Homo sapiens]	0	47.775	15	10	71	2	458	49.6	4.96	209.72	10	cell organization and biogenesis;stress response;other biological processes	cytosol;cytoskeleton	other molecular function	Pf00038	3860	ENSG00000171401	KRT13	hsa:3860; P13646; Q53G54; Q6AZK5; Q8N240	Formation of the cornified envelope
O75340	Programmed cell death protein 6 [OS=Homo sapiens]	0	10.323	17	3	7	3	191	21.9	5.4	25.36	3	cell organization and biogenesis;stress response;transport;developmental processes;signal transduction;other biological processes	other membranes;cytosol;ER/Golgi;nucleus;other cytoplasmic organelle;other cell component	other molecular function	Pf13202, Pf13499	10016	ENSG00000249915	PDCD6	B2RD16; E7ESR3; hsa:10016; O75340; Q2YDC2; Q5TZS0
Q9HAV7	GrpE protein homolog 1, mitochondrial [OS=Homo sapiens]	0.004	2.758	4	1	1	1	217	24.3	8.12	2.29	1	cell organization and biogenesis;transport;other biological processes	other membranes;mitochondrion;nucleus	other molecular function	Pf01025	80273	ENSG00000109519	GRPEL1	B2R783; hsa:80273; Q549M6; Q9HAV7	Mitochondrial protein import
Q04941	Proteolipid protein 2 [OS=Homo sapiens]	0.002	3.261	9	1	3	1	152	16.7	7.24	7.32	1	transport;signal transduction;other biological processes	plasma membrane;other membranes;ER/Golgi	transporter activity;other molecular function	Pf01284	5355	ENSG00000102007	PLP2	A6NDT7; hsa:5355; Q04941; Q32MM8
Q9HD42	Charged multivesicular body protein 1a [OS=Homo sapiens]	0.002	3.478	7	2	2	2	196	21.7	8.06	4.16	2	cell cycle OR cell proliferation;cell organization and biogenesis;protein metabolism;other metabolic processes;stress response;transport;other biological processes	plasma membrane;other membranes;cytosol;cytoskeleton;nucleus;other cytoplasmic organelle;other cell component	other molecular function	Pf03357	5119	ENSG00000131165	CHMP1A	A2RU09; hsa:5119; Q14468; Q15779; Q96G31; Q9HD42	HCMV Late Events
Q16543	Hsp90 co-chaperone Cdc37 [OS=Homo sapiens]	0	11.2	10	3	10	3	378	44.4	5.25	26.59	3	stress response;transport;other biological processes	cytosol;other cell component	enzyme regulator activity;other molecular function	Pf03234, Pf08564, Pf08565	11140	ENSG00000105401	CDC37	hsa:11140; Q16543; Q53YA2	RHOBTB2 GTPase cycle; Signaling by ERBB2 KD Mutants; Signaling by ERBB2 TMD/JMD mutants; Constitutive Signaling by Ligand-Responsive EGFR Cancer Variants; Constitutive Signaling by EGFRvIII; Signaling by ERBB2 ECD mutants; Constitutive Signaling by Overexpressed ERBB2; Regulation of necroptotic cell death; Downregulation of ERBB2 signaling; Drug-mediated inhibition of ERBB2 signaling; Resistance …
P53602	Diphosphomevalonate decarboxylase [OS=Homo sapiens]	0.002	4.307	3	1	1	1	400	43.4	7.23	3.06	1	other metabolic processes;other biological processes	cytosol	other molecular function	Pf00288, Pf18376	4597	ENSG00000167508	MVD	hsa:4597; P53602; Q53Y65	Activation of gene expression by SREBF (SREBP); Cholesterol biosynthesis; Synthesis of Dolichyl-phosphate
Q14019	Coactosin-like protein [OS=Homo sapiens]	0.002	3.094	8	1	2	1	142	15.9	5.67	1.84	1	cell organization and biogenesis;stress response	non-structural extracellular;cytosol;cytoskeleton;nucleus;other cell component	cytoskeletal activity;other molecular function	Pf00241	23406	ENSG00000103187	COTL1	B2RDU3; D3DUL9; hsa:23406; Q14019; Q86XM5	Neutrophil degranulation
P55010	Eukaryotic translation initiation factor 5 [OS=Homo sapiens]	0.002	3.757	2	1	1	1	431	49.2	5.58	3.35	1	cell organization and biogenesis;protein metabolism;other metabolic processes;other biological processes	plasma membrane;other membranes;cytosol;other cell component	enzyme regulator activity;nucleic acid binding activity;other molecular function	Pf01873, Pf02020	1983	ENSG00000100664	EIF5	hsa:1983; P55010; Q53XB3; Q9H5N2; Q9UG48	Ribosomal scanning and start codon recognition; GTP hydrolysis and joining of the 60S ribosomal subunit
Q9UK23	N-acetylglucosamine-1-phosphodiester alpha-N-acetylglucosaminidase [OS=Homo sapiens]	0.008	2.333	3	1	1	1	515	56	6.6	2.94	1	cell organization and biogenesis;protein metabolism;other metabolic processes;transport	other membranes;ER/Golgi	other molecular function	Pf09992	51172	ENSG00000103174	NAGPA	B2RAS1; hsa:51172; Q96EJ8; Q9UK23
Q9UNZ2	NSFL1 cofactor p47 [OS=Homo sapiens]	0.001	5.657	8	3	3	3	370	40.5	5.1	4.66	3	cell cycle OR cell proliferation;cell organization and biogenesis;protein metabolism;other metabolic processes;other biological processes	cytosol;cytoskeleton;ER/Golgi;nucleus;other cell component	other molecular function	Pf00789, Pf08059, Pf14555	55968	ENSG00000088833	NSFL1C	A2A2L1; B2RD74; hsa:55968; Q5JXA4; Q5JXA5; Q7Z533; Q9H102; Q9NVL9; Q9UI06; Q9UNZ2	RHOH GTPase cycle
O15020	Spectrin beta chain, non-erythrocytic 2 [OS=Homo sapiens]	0	19.843	3	9	13	3	2390	271.2	6.11	27.96	9	cell organization and biogenesis;transport;developmental processes;other biological processes	plasma membrane;other membranes;cytosol;cytoskeleton;other cell component	cytoskeletal activity;other molecular function	Pf00307, Pf00435, Pf15410	6712	ENSG00000173898	SPTBN2	hsa:6712; O14872; O14873; O15020	MHC class II antigen presentation; COPI-mediated anterograde transport; RAF/MAP kinase cascade; NCAM signaling for neurite out-growth; Interaction between L1 and Ankyrins
Q7L1Q6	eIF5-mimic protein 2 [OS=Homo sapiens]	0.002	3.835	5	3	4	3	419	48	5.92	6.2	3	other biological processes	other cell component		Pf02020	9689	ENSG00000082153	BZW1	B4DLZ8; B4DWF7; hsa:9689; Q14281; Q15394; Q7L1Q6; Q9BUY0
Q08211	ATP-dependent RNA helicase A [OS=Homo sapiens]	0	32.831	11	10	18	10	1270	140.9	6.84	46.73	10	cell organization and biogenesis;DNA metabolism;RNA metabolism OR transcription;other metabolic processes;stress response;transport;other biological processes	cytosol;cytoskeleton;translational apparatus;nucleus;other cell component	nucleic acid binding activity;other molecular function	Pf00035, Pf00270, Pf00271, Pf04408, Pf07717	1660	ENSG00000135829	DHX9	B2RNV4; hsa:1660; Q05CI5; Q08211; Q12803; Q32Q22; Q5VY62; Q6PD69; Q99556	mRNA Splicing - Major Pathway; RIP-mediated NFkB activation via ZBP1; DEx/H-box helicases activate type I IFN and inflammatory cytokines production
Q14624	Inter-alpha-trypsin inhibitor heavy chain H4 [OS=Homo sapiens]	0	7.871	2	2	5	2	930	103.3	6.98	5.82	2	other metabolic processes;stress response;other biological processes	non-structural extracellular;plasma membrane;other membranes;other cell component	enzyme regulator activity	Pf00092, Pf06668, Pf08487	3700	ENSG00000055955	ITIH4	B7Z545; E9PGN5; hsa:3700; Q14624; Q15135; Q9P190; Q9UQ54	Platelet degranulation
O43149	Zinc finger ZZ-type and EF-hand domain-containing protein 1 [OS=Homo sapiens]	0.001	7.292	1	2	2	2	2961	330.9	5.95	7.37	2	cell organization and biogenesis		other molecular function	Pf00569, Pf03256	23140	ENSG00000074755	ZZEF1	A7MBM5; hsa:23140; O43149; Q6NXG0; Q6ZRA1; Q6ZSF4; Q9NVB9
Q9H7P6	Multivesicular body subunit 12B [OS=Homo sapiens]	0.003	2.986	4	1	1	1	319	35.6	8.15	0	1	cell organization and biogenesis;protein metabolism;other metabolic processes;transport;other biological processes	plasma membrane;other membranes;cytosol;nucleus;other cytoplasmic organelle;other cell component	other molecular function	Pf10240	89853	ENSG00000196814	MVB12B	hsa:89853; Q8N6S7; Q9H7P6	HCMV Late Events; Budding and maturation of HIV virion; Membrane binding and targetting of GAG proteins; Endosomal Sorting Complex Required For Transport (ESCRT); Late endosomal microautophagy
Q9NVD7	Alpha-parvin [OS=Homo sapiens]	0.002	4.109	4	1	3	1	372	42.2	5.95	7.52	1	cell adhesion;cell organization and biogenesis;developmental processes;other biological processes	plasma membrane;other membranes;cytosol;cytoskeleton;nucleus;other cell component	enzyme regulator activity;cytoskeletal activity	Pf00307	55742	ENSG00000197702	PARVA	hsa:55742; Q96C85; Q9HA48; Q9NVD7	Localization of the PINCH-ILK-PARVIN complex to focal adhesions; Regulation of cytoskeletal remodeling and cell spreading by IPP complex components
P17812	CTP synthase 1 [OS=Homo sapiens]	0	11.452	8	4	7	4	591	66.6	6.46	17.44	4	cell cycle OR cell proliferation;other metabolic processes;other biological processes	cytosol;other cell component	other molecular function	Pf00117, Pf06418	1503	ENSG00000171793	CTPS1	B4DR64; D3DPW1; hsa:1503; P17812; Q5VW67; Q96GK6	Interconversion of nucleotide di- and triphosphates
P56385	ATP synthase subunit e, mitochondrial [OS=Homo sapiens]	0.004	2.689	14	1	2	1	69	7.9	9.35	4.43	1	other metabolic processes;transport	other membranes;mitochondrion	transporter activity	Pf05680	521	ENSG00000169020	ATP5ME	hsa:521; P56385; Q0D2L9	Cristae formation; Formation of ATP by chemiosmotic coupling
Q9UEY8	Gamma-adducin [OS=Homo sapiens]	0.001	6.681	4	2	2	2	706	79.1	6.32	7.14	2	cell organization and biogenesis	plasma membrane;other membranes;cytosol;cytoskeleton;nucleus;other cell component	cytoskeletal activity;other molecular function	Pf00596	120	ENSG00000148700	ADD3	D3DRA8; hsa:120; O43243; Q5VU09; Q92773; Q9UEY7; Q9UEY8	RHOD GTPase cycle; RHOF GTPase cycle; Miscellaneous transport and binding events
P0DOX8	Immunoglobulin lambda-1 light chain [OS=Homo sapiens]	0	8.617	15	3	4	2	216	22.8	6.76	8	3	other biological processes	non-structural extracellular;plasma membrane;other membranes;other cell component		Pf07654, Pf07686
O60879	Protein diaphanous homolog 2 [OS=Homo sapiens]	0	7.884	3	2	2	2	1101	125.5	6.58	8.07	2	cell organization and biogenesis;other biological processes	cytosol;cytoskeleton;ER/Golgi;nucleus;other cytoplasmic organelle;other cell component	signal transduction activity or receptor binding;cytoskeletal activity;other molecular function	Pf02181, Pf06367, Pf06371	1730	ENSG00000147202	DIAPH2	A6NG19; hsa:1730; O60878; O60879; Q8WX06; Q8WX48; Q9UJL2	RHOF GTPase cycle
Q16401	26S proteasome non-ATPase regulatory subunit 5 [OS=Homo sapiens]	0	8.254	6	3	7	3	504	56.2	5.48	18.21	3	cell organization and biogenesis	cytosol;nucleus;other cell component		Pf10508	5711	ENSG00000095261	PSMD5	B4DZM8; hsa:5711; Q15045; Q16401; Q4VXG8	FCERI mediated NF-kB activation; Downstream TCR signaling; Antigen processing: Ubiquitination & Proteasome degradation; Activation of NF-kappaB in B cells; Oxygen-dependent proline hydroxylation of Hypoxia-inducible Factor Alpha; ER-Phagosome pathway; Cross-presentation of soluble exogenous antigens (endosomes); SCF-beta-TrCP mediated degradation of Emi1; APC/C:Cdc20 mediated degradation of Secur…
Q9Y285	Phenylalanine--tRNA ligase alpha subunit [OS=Homo sapiens]	0.001	7.223	6	3	4	3	508	57.5	7.8	9.67	3	cell organization and biogenesis;protein metabolism;RNA metabolism OR transcription;other metabolic processes	cytosol;other cell component	nucleic acid binding activity;other molecular function	Pf01409, Pf18552, Pf18553, Pf18554	2193	ENSG00000179115	FARSA	B4E363; hsa:2193; Q9NSD8; Q9Y285; Q9Y4W8	Cytosolic tRNA aminoacylation

## Sheet: 0-21% vs 21%
Accession	Description	Exp. q-value: Combined	Sum PEP Score	Coverage [%]	# Peptides	# PSMs	# Unique Peptides	# AAs	MW [kDa]	calc. pI	Score Sequest HT: Sequest HT	# Peptides (by Search Engine): Sequest HT	Biological Process	Cellular Component	Molecular Function	Pfam IDs	Entrez Gene ID	Ensembl Gene ID	Gene Symbol	Gene ID
Q9BRX8	Peroxiredoxin-like 2A [OS=Homo sapiens]	0.001	7.353	8	2	3	2	229	25.7	8.84	8.7	2	other biological processes	non-structural extracellular;other cell component	other molecular function	Pf13911	84293	ENSG00000122378	PRXL2A	B2RD81; hsa:84293; Q6UW08; Q8N2K3; Q8NBK9; Q96JR0; Q9BRX8
P35670	Copper-transporting ATPase 2 [OS=Homo sapiens]	0.002	3.213	0	1	16	1	1465	157.2	6.7	38.97	1	protein metabolism;other metabolic processes;transport;other biological processes	plasma membrane;other membranes;mitochondrion;ER/Golgi;other cytoplasmic organelle	transporter activity;other molecular function	Pf00122, Pf00403, Pf00702	540	ENSG00000123191	ATP7B	hsa:540; P35670; Q16318; Q16319; Q4U3V3; Q59FJ9; Q5T7X7
P67775	Serine/threonine-protein phosphatase 2A catalytic subunit alpha isoform [OS=Homo sapiens]	0	49.935	40	9	25	1	309	35.6	5.54	84.72	9	cell cycle OR cell proliferation;protein metabolism;RNA metabolism OR transcription;other metabolic processes;signal transduction;other biological processes	plasma membrane;other membranes;cytosol;cytoskeleton;mitochondrion;nucleus;other cell component	signal transduction activity or receptor binding;cytoskeletal activity;other molecular function	Pf00149	5515	ENSG00000113575	PPP2CA	hsa:5515; P05323; P13197; P67775
Q5T749	Keratinocyte proline-rich protein [OS=Homo sapiens]	0.007	2.428	1	1	1	1	579	64.1	8.27	2.39	1		other cell component			448834	ENSG00000203786	KPRP	hsa:448834; Q5T749
Q01995	Transgelin [OS=Homo sapiens]	0.002	3.695	4	1	1	1	201	22.6	8.84	3.07	1	other biological processes	cytoskeleton;other cell component	cytoskeletal activity	Pf00307, Pf00402	6876	ENSG00000149591	TAGLN	hsa:6876; O15542; Q01995
Q9H6N6	Putative uncharacterized protein MYH16 [OS=Homo sapiens]	0.004	2.773	1	1	2	1	1097	128.2	5.49	5.81	1		cytoskeleton		Pf01576			MYH16	Q9H6N6
Q9UHG3	Prenylcysteine oxidase 1 [OS=Homo sapiens]	0.001	7.514	4	2	2	2	505	56.6	6.18	6.95	2	protein metabolism;other metabolic processes;transport	non-structural extracellular;plasma membrane;other membranes;other cytoplasmic organelle	other molecular function	Pf07156, Pf13450	51449	ENSG00000116005	PCYOX1	B2RB14; B7Z9P8; hsa:51449; O94982; Q8N4N5; Q96QM8; Q9UHG3
Q13596	Sorting nexin-1 [OS=Homo sapiens]	0.002	3.749	2	1	1	1	522	59	5.15	3.48	1	cell organization and biogenesis;transport;other biological processes	other membranes;cytosol;ER/Golgi;other cytoplasmic organelle;other cell component	signal transduction activity or receptor binding;other molecular function	Pf00787, Pf03700, Pf09325	6642	ENSG00000028528	SNX1	A6NM19; A8K6T7; H0Y2M5; hsa:6642; O60750; O60751; Q13596; Q6ZRJ8
Q96P63	Serpin B12 [OS=Homo sapiens]	0.003	2.955	2	1	1	1	405	46.2	5.53	2.86	1	other biological processes	non-structural extracellular;plasma membrane;other membranes;other cell component	enzyme regulator activity;other molecular function	Pf00079	89777	ENSG00000166634	SERPINB12	hsa:89777; Q3SYB4; Q96P63
Q15005	Signal peptidase complex subunit 2 [OS=Homo sapiens]	0.007	2.43	8	1	1	1	226	25	8.47	2.43	1	protein metabolism;other metabolic processes;transport	other membranes;ER/Golgi		Pf06703	9789	ENSG00000118363	SPCS2	hsa:9789; Q15005; Q15507; Q3KQT0; Q641R4; Q6FG65; Q6IRX0; Q6P1P4; Q96HU9
P60903	Protein S100-A10 [OS=Homo sapiens]	0.001	7.489	28	2	6	2	97	11.2	7.37	17.32	2	cell organization and biogenesis;RNA metabolism OR transcription;other metabolic processes;transport;other biological processes	non-structural extracellular;plasma membrane;other membranes;nucleus;other cell component	other molecular function	Pf01023	6281	ENSG00000197747	S100A10	A8K4V8; hsa:6281; P08206; P60903; Q5T1C5
Q8WVV4	Protein POF1B [OS=Homo sapiens]	0.001	5.626	4	2	2	2	589	68	6.32	3.81	2	cell organization and biogenesis;other biological processes	cytoskeleton;other cell component	cytoskeletal activity		79983	ENSG00000124429	POF1B	A8K2U5; hsa:79983; Q5H9E9; Q5H9F0; Q8NG12; Q8WVV4; Q9H5Y2; Q9H738; Q9H744
Q01469	Fatty acid-binding protein 5 [OS=Homo sapiens]	0	7.884	19	3	4	3	135	15.2	7.01	9.62	3	other metabolic processes;transport;other biological processes	non-structural extracellular;plasma membrane;other membranes;cytosol;nucleus;other cytoplasmic organelle;other cell component	transporter activity;other molecular function	Pf00061	2171	ENSG00000164687	FABP5	B2R4K0; hsa:2171; Q01469
Accession	Description	Exp. q-value: Combined	Sum PEP Score	Coverage [%]	# Peptides	# PSMs	# Unique Peptides	# AAs	MW [kDa]	calc. pI	Score Sequest HT: Sequest HT	# Peptides (by Search Engine): Sequest HT	Biological Process	Cellular Component	Molecular Function	Pfam IDs	Entrez Gene ID	Ensembl Gene ID	Gene Symbol	Gene ID
Q9BQA1	Methylosome protein 50 [OS=Homo sapiens]	0.001	4.704	12	1	1	1	342	36.7	5.17	7.2	1	cell cycle OR cell proliferation;cell organization and biogenesis;protein metabolism;RNA metabolism OR transcription;other metabolic processes;developmental processes;other biological processes	cytosol;ER/Golgi;nucleus;other cell component	nucleic acid binding activity;other molecular function	Pf00400	79084	ENSG00000116455	WDR77	B3KMW6; B4DP38; hsa:79084; Q3LID2; Q53FU2; Q6JZZ5; Q96GK4; Q9BQA1; Q9BWY3
P17661	Desmin [OS=Homo sapiens]	0	38.602	10	7	57	1	470	53.5	5.27	159.61	7	cell organization and biogenesis;other biological processes	plasma membrane;other membranes;cytosol;cytoskeleton;nucleus;other cell component	cytoskeletal activity;other molecular function	Pf00038, Pf04732	1674	ENSG00000175084	DES	hsa:1674; P17661; Q15787; Q549R7; Q549R8; Q549R9; Q8IZR1; Q8IZR6; Q8NES2; Q8NEU6; Q8TAC4; Q8TCX2; Q8TD99; Q9UHN5; Q9UJ80
P19367	Hexokinase-1 [OS=Homo sapiens]	0.001	6.541	3	2	2	2	917	102.4	6.8	5.32	2	other metabolic processes;stress response;other biological processes	other membranes;cytosol;mitochondrion	kinase activity;other molecular function	Pf00349, Pf03727	3098	ENSG00000156515	HK1	E9PCK0; hsa:3098; O43443; O43444; O75574; P19367; Q5VTC3; Q96HC8; Q9NNZ4; Q9NNZ5
Q13283	Ras GTPase-activating protein-binding protein 1 [OS=Homo sapiens]	0	19.881	17	4	8	4	466	52.1	5.52	31.94	4	cell organization and biogenesis;stress response;signal transduction;other biological processes	cytosol;nucleus;other cell component	nucleic acid binding activity;other molecular function	Pf00076, Pf02136	10146	ENSG00000145907	G3BP1	hsa:10146; Q13283; Q5HYE9
O75131	Copine-3 [OS=Homo sapiens]	0.008	2.331	2	1	1	1	537	60.1	5.85	2.46	1	signal transduction;other biological processes	plasma membrane;other membranes;cytosol;mitochondrion;nucleus;other cytoplasmic organelle;other cell component	signal transduction activity or receptor binding;kinase activity;other molecular function	Pf00168, Pf07002	8895	ENSG00000085719	CPNE3	A8KA47; hsa:8895; O75131; Q8IYA1
Q9H4L5	Oxysterol-binding protein-related protein 3 [OS=Homo sapiens]	0.002	3.498	2	1	1	1	887	101.2	6.87	0	1	other metabolic processes;transport	plasma membrane;other membranes;cytosol;ER/Golgi;nucleus;other cell component	transporter activity;other molecular function	Pf01237, Pf15409	26031	ENSG00000070882	OSBPL3	A4D167; A4D168; A4D169; A4D170; A4D171; A4D172; B8ZZ79; B8ZZP0; hsa:26031; O14591; O43357; O43358; Q8N702; Q8N703; Q8N704; Q8NFH0; Q8NFH1; Q8NI12; Q8NI13; Q9BZF4; Q9H4L5; Q9UED6
Q6PCB0	von Willebrand factor A domain-containing protein 1 [OS=Homo sapiens]	0.001	6.301	10	2	2	2	445	46.8	7.68	5.85	2	cell organization and biogenesis;stress response	extracellular matrix;ER/Golgi	other molecular function	Pf00041, Pf00092	64856	ENSG00000179403	VWA1	A8K692; B3KUA1; E9PB53; hsa:64856; Q6PCB0; Q7L5D7; Q9H6J5
P02787	Serotransferrin [OS=Homo sapiens]	0	11.531	5	4	10	4	698	77	7.12	26.31	4	cell organization and biogenesis;stress response;transport;signal transduction;other biological processes	non-structural extracellular;plasma membrane;other membranes;ER/Golgi;other cytoplasmic organelle;other cell component	signal transduction activity or receptor binding;other molecular function	Pf00405	7018	ENSG00000091513	TF	hsa:7018; O43890; P02787; Q1HBA5; Q9NQB8; Q9UHV0
P01344	Insulin-like growth factor II [OS=Homo sapiens]	0.003	2.956	5	1	1	1	180	20.1	9.32	2.36	1	cell cycle OR cell proliferation;cell organization and biogenesis;other metabolic processes;developmental processes;signal transduction;other biological processes	non-structural extracellular;other cell component	signal transduction activity or receptor binding;enzyme regulator activity	Pf00049, Pf08365	3481	ENSG00000167244	IGF2	B3KX48; B7WP08; C9JAF2; E3UN45; hsa:3481; P01344; P78449; Q14299; Q1WM26; Q9UC68; Q9UC69
Q96M83	Coiled-coil domain-containing protein 7 [OS=Homo sapiens]	0.002	3.072	1	1	1	1	1385	157.4	7.58	3.17	1				Pf15368	79741	ENSG00000216937	CCDC7	B0QZ71; hsa:79741; Q08AN7; Q5VW55; Q8IVQ0; Q8N7T7; Q8NEQ0; Q96M83; Q9H943
P01266	Thyroglobulin [OS=Homo sapiens]	0.004	2.812	0	1	1	1	2768	304.6	5.58	2.45	1	other metabolic processes;transport;developmental processes;signal transduction;other biological processes	non-structural extracellular	signal transduction activity or receptor binding;other molecular function	Pf00086, Pf00135, Pf07699	7038	ENSG00000042832	TG	hsa:7038; O15274; O43899; P01266; Q15593; Q15948; Q9NYR1; Q9NYR2; Q9UMZ0; Q9UNY3
Q9P2R3	Rabankyrin-5 [OS=Homo sapiens]	0.002	3.438	1	1	1	1	1169	128.3	6.1	2.59	1	cell organization and biogenesis;transport;other biological processes	other membranes;cytosol;other cytoplasmic organelle;other cell component	other molecular function	Pf00023, Pf00651, Pf01363, Pf12796, Pf13637, Pf13857	51479	ENSG00000185722	ANKFY1	A8KA65; hsa:51479; Q5RKV4; Q9P2R3; Q9ULG5
Q15493	Regucalcin [OS=Homo sapiens]	0.002	3.933	6	1	1	1	299	33.2	6.25	3.32	1	other metabolic processes;developmental processes;other biological processes	cytosol;nucleus;other cell component	enzyme regulator activity;other molecular function	Pf08450	9104	ENSG00000130988	RGN	A4FTW1; A8K271; hsa:9104; Q15493; Q53FC9; Q5JRR5

## Sheet: 10% vs 21%
Accession	Description	Exp. q-value: Combined	Sum PEP Score	Coverage [%]	# Peptides	# PSMs	# Unique Peptides	# AAs	MW [kDa]	calc. pI	Score Sequest HT: Sequest HT	# Peptides (by Search Engine): Sequest HT	Biological Process	Cellular Component	Molecular Function	Pfam IDs	Entrez Gene ID	Ensembl Gene ID	Gene Symbol	Gene ID
Q5TEC6	Histone H3-7 [OS=Homo sapiens]	0	17.377	38	7	28	1	136	15.4	11.27	70.96	7		other cell component	nucleic acid binding activity;other molecular function	Pf00125		ENSG00000273213	H3-7	Q5TEC6
Q5T749	Keratinocyte proline-rich protein [OS=Homo sapiens]	0.007	2.428	1	1	1	1	579	64.1	8.27	2.39	1		other cell component			448834	ENSG00000203786	KPRP	hsa:448834; Q5T749
Q9H6N6	Putative uncharacterized protein MYH16 [OS=Homo sapiens]	0.004	2.773	1	1	2	1	1097	128.2	5.49	5.81	1		cytoskeleton		Pf01576			MYH16	Q9H6N6
Q16563	Synaptophysin-like protein 1 [OS=Homo sapiens]	0.002	3.349	6	1	1	1	259	28.5	8.43	2.05	1	cell-cell signaling	plasma membrane;other membranes;ER/Golgi;other cell component		Pf01284	6856	ENSG00000008282	SYPL1	A4D0R2; hsa:6856; Q16563; Q96AR8
Q14699	Raftlin [OS=Homo sapiens]	0.002	3.523	5	2	2	2	578	63.1	5.67	1.88	2	cell organization and biogenesis;transport;signal transduction;other biological processes	plasma membrane;other membranes;other cytoplasmic organelle;other cell component	nucleic acid binding activity	Pf15250	23180	ENSG00000131378	RFTN1	hsa:23180; Q0D2G0; Q14699; Q496Y2; Q4QQI7; Q5JB48; Q7Z7P2
Q15005	Signal peptidase complex subunit 2 [OS=Homo sapiens]	0.007	2.43	8	1	1	1	226	25	8.47	2.43	1	protein metabolism;other metabolic processes;transport	other membranes;ER/Golgi		Pf06703	9789	ENSG00000118363	SPCS2	hsa:9789; Q15005; Q15507; Q3KQT0; Q641R4; Q6FG65; Q6IRX0; Q6P1P4; Q96HU9
Q9BVC6	Transmembrane protein 109 [OS=Homo sapiens]	0.002	3.939	5	1	1	1	243	26.2	10.48	2.6	1	stress response;transport;signal transduction;other biological processes	other membranes;cytosol;ER/Golgi;nucleus	transporter activity	Pf14965	79073	ENSG00000110108	TMEM109	hsa:79073; Q9BVC6
Accession	Description	Exp. q-value: Combined	Sum PEP Score	Coverage [%]	# Peptides	# PSMs	# Unique Peptides	# AAs	MW [kDa]	calc. pI	Score Sequest HT: Sequest HT	# Peptides (by Search Engine): Sequest HT	Biological Process	Cellular Component	Molecular Function	Pfam IDs	Entrez Gene ID	Ensembl Gene ID	Gene Symbol	Gene ID
O95969	Secretoglobin family 1D member 2 [OS=Homo sapiens]	0.002	3.224	12	1	1	1	90	9.9	8.25	2.33	1				Pf01099	10647	ENSG00000124935	SCGB1D2	hsa:10647; O95969; Q2M3N9
Q9BQA1	Methylosome protein 50 [OS=Homo sapiens]	0.001	4.704	12	1	1	1	342	36.7	5.17	7.2	1	cell cycle OR cell proliferation;cell organization and biogenesis;protein metabolism;RNA metabolism OR transcription;other metabolic processes;developmental processes;other biological processes	cytosol;ER/Golgi;nucleus;other cell component	nucleic acid binding activity;other molecular function	Pf00400	79084	ENSG00000116455	WDR77	B3KMW6; B4DP38; hsa:79084; Q3LID2; Q53FU2; Q6JZZ5; Q96GK4; Q9BQA1; Q9BWY3
Q16513	Serine/threonine-protein kinase N2 [OS=Homo sapiens]	0.002	4.033	3	2	3	2	984	112	6.3	2.65	2	cell adhesion;cell cycle OR cell proliferation;cell organization and biogenesis;protein metabolism;other metabolic processes;signal transduction;other biological processes	plasma membrane;other membranes;cytosol;cytoskeleton;nucleus;other cell component	kinase activity;other molecular function	Pf00069, Pf00433, Pf02185	5586	ENSG00000065243	PKN2	B4DQ21; B4DTP5; B4DVG1; D3DT24; hsa:5586; Q08AF4; Q16513; Q9H1W4
P55263	Adenosine kinase [OS=Homo sapiens]	0.002	3.879	6	2	5	2	362	40.5	6.7	12.9	2	other metabolic processes	plasma membrane;other membranes;cytosol;nucleus	kinase activity;other molecular function	Pf00294	132	ENSG00000156110	ADK	B7Z783; B7Z800; hsa:132; O00741; O00742; P55263; Q16710; Q5JQ10; Q5JQ11; Q9BTN2
P01833	Polymeric immunoglobulin receptor [OS=Homo sapiens]	0.003	2.965	2	1	1	1	764	83.2	5.74	2.68	1	transport;signal transduction;other biological processes	non-structural extracellular;plasma membrane;other membranes;other cytoplasmic organelle;other cell component	other molecular function	Pf07686	5284	ENSG00000162896	PIGR	hsa:5284; P01833; Q68D81; Q8IZY7
Q96DA0	Zymogen granule protein 16 homolog B [OS=Homo sapiens]	0.001	5.326	8	1	1	1	208	22.7	7.39	6	1			other molecular function	Pf01419	124220	ENSG00000162078; ENSG00000283056	ZG16B	A6NIY1; B2R4F6; hsa:124220; Q6UW28; Q96DA0
O00743	Serine/threonine-protein phosphatase 6 catalytic subunit [OS=Homo sapiens]	0.004	2.808	5	1	1	1	305	35.1	5.69	2.48	1	cell cycle OR cell proliferation;cell organization and biogenesis;protein metabolism;other metabolic processes;stress response;transport	cytosol;mitochondrion;nucleus;other cell component	other molecular function	Pf00149	5537	ENSG00000119414	PPP6C	B2R5V6; B7Z2W9; B7Z5K9; hsa:5537; O00743; Q5U0A2; Q9UIC9
Q14574	Desmocollin-3 [OS=Homo sapiens]	0.002	3.305	2	1	1	1	896	99.9	6.1	2.87	1	cell adhesion;developmental processes;other biological processes	non-structural extracellular;plasma membrane;other membranes;other cell component	other molecular function	Pf00028, Pf01049, Pf08758	1825	ENSG00000134762	DSC3	A6NN35; hsa:1825; Q14200; Q14574; Q9HAZ9
Q15493	Regucalcin [OS=Homo sapiens]	0.002	3.933	6	1	1	1	299	33.2	6.25	3.32	1	other metabolic processes;developmental processes;other biological processes	cytosol;nucleus;other cell component	enzyme regulator activity;other molecular function	Pf08450	9104	ENSG00000130988	RGN	A4FTW1; A8K271; hsa:9104; Q15493; Q53FC9; Q5JRR5

## Sheet: 2% vs 21%
Accession	Description	Exp. q-value: Combined	Sum PEP Score	Coverage [%]	# Peptides	# PSMs	# Unique Peptides	# AAs	MW [kDa]	calc. pI	Score Sequest HT: Sequest HT	# Peptides (by Search Engine): Sequest HT	Biological Process	Cellular Component	Molecular Function	Pfam IDs	Entrez Gene ID	Ensembl Gene ID	Gene Symbol	Gene ID
Q9BRX8	Peroxiredoxin-like 2A [OS=Homo sapiens]	0.001	7.353	8	2	3	2	229	25.7	8.84	8.7	2	other biological processes	non-structural extracellular;other cell component	other molecular function	Pf13911	84293	ENSG00000122378	PRXL2A	B2RD81; hsa:84293; Q6UW08; Q8N2K3; Q8NBK9; Q96JR0; Q9BRX8
P67775	Serine/threonine-protein phosphatase 2A catalytic subunit alpha isoform [OS=Homo sapiens]	0	49.935	40	9	25	1	309	35.6	5.54	84.72	9	cell cycle OR cell proliferation;protein metabolism;RNA metabolism OR transcription;other metabolic processes;signal transduction;other biological processes	plasma membrane;other membranes;cytosol;cytoskeleton;mitochondrion;nucleus;other cell component	signal transduction activity or receptor binding;cytoskeletal activity;other molecular function	Pf00149	5515	ENSG00000113575	PPP2CA	hsa:5515; P05323; P13197; P67775
Q5TEC6	Histone H3-7 [OS=Homo sapiens]	0	17.377	38	7	28	1	136	15.4	11.27	70.96	7		other cell component	nucleic acid binding activity;other molecular function	Pf00125		ENSG00000273213	H3-7	Q5TEC6
Q9HBI1	Beta-parvin [OS=Homo sapiens]	0.002	3.275	4	1	1	1	364	41.7	6.73	2.53	1	cell adhesion;cell organization and biogenesis;other biological processes	plasma membrane;other membranes;cytosol;cytoskeleton;other cell component	cytoskeletal activity	Pf00307	29780	ENSG00000188677	PARVB	B0QYM8; B0QYN1; B2R9X6; hsa:29780; Q5TGJ5; Q86X93; Q96PN1; Q9HBI1; Q9NSP7; Q9UGT3; Q9Y368; Q9Y3L6; Q9Y3L7
Q5T749	Keratinocyte proline-rich protein [OS=Homo sapiens]	0.007	2.428	1	1	1	1	579	64.1	8.27	2.39	1		other cell component			448834	ENSG00000203786	KPRP	hsa:448834; Q5T749
O75533	Splicing factor 3B subunit 1 [OS=Homo sapiens]	0	29.392	9	9	11	9	1304	145.7	7.09	37.27	9	cell organization and biogenesis;RNA metabolism OR transcription;other metabolic processes;other biological processes	nucleus	nucleic acid binding activity;other molecular function	Pf08920	23451	ENSG00000115524	SF3B1	E9PCH3; hsa:23451; O75533
Q9H6N6	Putative uncharacterized protein MYH16 [OS=Homo sapiens]	0.004	2.773	1	1	2	1	1097	128.2	5.49	5.81	1		cytoskeleton		Pf01576			MYH16	Q9H6N6
P28482	Mitogen-activated protein kinase 1 [OS=Homo sapiens]	0.001	4.618	4	2	2	1	360	41.4	6.98	5.13	2	cell-cell signaling;cell cycle OR cell proliferation;protein metabolism;other metabolic processes;stress response;transport;developmental processes;signal transduction;other biological processes	non-structural extracellular;plasma membrane;other membranes;cytosol;cytoskeleton;mitochondrion;ER/Golgi;nucleus;other cytoplasmic organelle;other cell component	nucleic acid binding activity;kinase activity;other molecular function	Pf00069	5594	ENSG00000100030	MAPK1	A8CZ64; hsa:5594; P28482
Q9UHG3	Prenylcysteine oxidase 1 [OS=Homo sapiens]	0.001	7.514	4	2	2	2	505	56.6	6.18	6.95	2	protein metabolism;other metabolic processes;transport	non-structural extracellular;plasma membrane;other membranes;other cytoplasmic organelle	other molecular function	Pf07156, Pf13450	51449	ENSG00000116005	PCYOX1	B2RB14; B7Z9P8; hsa:51449; O94982; Q8N4N5; Q96QM8; Q9UHG3
Q96P63	Serpin B12 [OS=Homo sapiens]	0.003	2.955	2	1	1	1	405	46.2	5.53	2.86	1	other biological processes	non-structural extracellular;plasma membrane;other membranes;other cell component	enzyme regulator activity;other molecular function	Pf00079	89777	ENSG00000166634	SERPINB12	hsa:89777; Q3SYB4; Q96P63
P01833	Polymeric immunoglobulin receptor [OS=Homo sapiens]	0.003	2.965	2	1	1	1	764	83.2	5.74	2.68	1	transport;signal transduction;other biological processes	non-structural extracellular;plasma membrane;other membranes;other cytoplasmic organelle;other cell component	other molecular function	Pf07686	5284	ENSG00000162896	PIGR	hsa:5284; P01833; Q68D81; Q8IZY7
P51153	Ras-related protein Rab-13 [OS=Homo sapiens]	0.001	6.286	15	3	3	1	203	22.8	9.19	4.78	3	cell organization and biogenesis;transport;developmental processes;signal transduction;other biological processes	plasma membrane;other membranes;cytosol;ER/Golgi;other cytoplasmic organelle;other cell component	other molecular function	Pf00071	5872	ENSG00000143545	RAB13	A8K6B5; D3DV67; hsa:5872; P51153; Q5U0A6; Q6GPG6; Q96GU4
Accession	Description	Exp. q-value: Combined	Sum PEP Score	Coverage [%]	# Peptides	# PSMs	# Unique Peptides	# AAs	MW [kDa]	calc. pI	Score Sequest HT: Sequest HT	# Peptides (by Search Engine): Sequest HT	Biological Process	Cellular Component	Molecular Function	Pfam IDs	Entrez Gene ID	Ensembl Gene ID	Gene Symbol	Gene ID
O43815	Striatin [OS=Homo sapiens]	0.001	6.049	4	2	2	2	780	86.1	5.27	5.08	2	cell-cell signaling;cell organization and biogenesis;developmental processes;signal transduction;other biological processes	plasma membrane;other membranes;cytosol;other cell component	other molecular function	Pf00400, Pf08232	6801	ENSG00000115808	STRN	hsa:6801; O43815; Q3KP65; Q53TQ8; Q9NP38
P19367	Hexokinase-1 [OS=Homo sapiens]	0.001	6.541	3	2	2	2	917	102.4	6.8	5.32	2	other metabolic processes;stress response;other biological processes	other membranes;cytosol;mitochondrion	kinase activity;other molecular function	Pf00349, Pf03727	3098	ENSG00000156515	HK1	E9PCK0; hsa:3098; O43443; O43444; O75574; P19367; Q5VTC3; Q96HC8; Q9NNZ4; Q9NNZ5
P01834	Immunoglobulin kappa constant [OS=Homo sapiens]	0	11.061	36	2	5	2	107	11.8	6.52	16.43	2	cell organization and biogenesis;stress response;transport;signal transduction;other biological processes	non-structural extracellular;plasma membrane;other membranes;other cell component	signal transduction activity or receptor binding;other molecular function	Pf07654			IGKC	A0A075B6H6; A0A087X130; P01834
Q9NRN5	Olfactomedin-like protein 3 [OS=Homo sapiens]	0	16.86	12	6	10	6	406	46	6.57	24.17	6	signal transduction	non-structural extracellular		Pf02191	56944	ENSG00000116774	OLFML3	hsa:56944; Q53FR1; Q53HV9; Q5SQL6; Q69AX9; Q8NBJ2; Q9NRN5
Q14533	Keratin, type II cuticular Hb1 [OS=Homo sapiens]	0.001	5.274	3	2	11	1	505	54.9	5.47	22.72	2	cell organization and biogenesis;other biological processes	cytosol;cytoskeleton	bone, tooth or skin structural activity	Pf00038, Pf16208	3887	ENSG00000205426	KRT81	hsa:3887; Q14533; Q14846; Q16274; Q17R48; Q8WU52; Q9BR74
Q96AQ6	Pre-B-cell leukemia transcription factor-interacting protein 1 [OS=Homo sapiens]	0.002	3.362	3	2	2	2	731	80.6	5.33	2.41	2	cell adhesion;cell organization and biogenesis;protein metabolism;RNA metabolism OR transcription;other metabolic processes;stress response;developmental processes;other biological processes	other membranes;cytosol;cytoskeleton;nucleus;other cell component	other molecular function		57326	ENSG00000163346	PBXIP1	hsa:57326; Q5T174; Q5T176; Q96AQ6; Q9H8X6; Q9HA02; Q9HD85
Q92572	AP-3 complex subunit sigma-1 [OS=Homo sapiens]	0.004	2.771	6	1	1	1	193	21.7	5.39	2.06	1	cell organization and biogenesis;transport;signal transduction	other membranes;ER/Golgi;other cytoplasmic organelle;other cell component		Pf01217	1176	ENSG00000177879	AP3S1	hsa:1176; O00647; O00676; O00721; O00727; Q53XL4; Q6ICQ2; Q92572
Q15018	BRISC complex subunit Abraxas 2 [OS=Homo sapiens]	0	8.4	10	3	3	3	415	46.9	6.21	8.59	3	cell cycle OR cell proliferation;cell organization and biogenesis;protein metabolism;other metabolic processes;stress response;other biological processes	cytosol;cytoskeleton;nucleus;other cell component	cytoskeletal activity;other molecular function		23172	ENSG00000165660	ABRAXAS2	B4DKR2; hsa:23172; Q15018; Q96H11
P0DOY2	Immunoglobulin lambda constant 2 [OS=Homo sapiens]	0	12.297	48	4	6	3	106	11.3	7.24	13.9	4	cell organization and biogenesis;stress response;transport;signal transduction;other biological processes	non-structural extracellular;plasma membrane;other membranes	signal transduction activity or receptor binding;other molecular function	Pf07654		ENSG00000211677	IGLC2	A0A075B6K9; A0M8Q4; P0CG05; P0CG06; P0DOY2; P80423
O00743	Serine/threonine-protein phosphatase 6 catalytic subunit [OS=Homo sapiens]	0.004	2.808	5	1	1	1	305	35.1	5.69	2.48	1	cell cycle OR cell proliferation;cell organization and biogenesis;protein metabolism;other metabolic processes;stress response;transport	cytosol;mitochondrion;nucleus;other cell component	other molecular function	Pf00149	5537	ENSG00000119414	PPP6C	B2R5V6; B7Z2W9; B7Z5K9; hsa:5537; O00743; Q5U0A2; Q9UIC9
P01266	Thyroglobulin [OS=Homo sapiens]	0.004	2.812	0	1	1	1	2768	304.6	5.58	2.45	1	other metabolic processes;transport;developmental processes;signal transduction;other biological processes	non-structural extracellular	signal transduction activity or receptor binding;other molecular function	Pf00086, Pf00135, Pf07699	7038	ENSG00000042832	TG	hsa:7038; O15274; O43899; P01266; Q15593; Q15948; Q9NYR1; Q9NYR2; Q9UMZ0; Q9UNY3
Q9NUM4	Transmembrane protein 106B [OS=Homo sapiens]	0.001	5.142	6	1	1	1	274	31.1	6.99	5.01	1	cell organization and biogenesis;protein metabolism;other metabolic processes;transport;developmental processes;other biological processes	other membranes;other cytoplasmic organelle	other molecular function	Pf07092	54664	ENSG00000106460	TMEM106B	A4D108; hsa:54664; Q53FL9; Q8N4L0; Q9NUM4
Q9P2R3	Rabankyrin-5 [OS=Homo sapiens]	0.002	3.438	1	1	1	1	1169	128.3	6.1	2.59	1	cell organization and biogenesis;transport;other biological processes	other membranes;cytosol;other cytoplasmic organelle;other cell component	other molecular function	Pf00023, Pf00651, Pf01363, Pf12796, Pf13637, Pf13857	51479	ENSG00000185722	ANKFY1	A8KA65; hsa:51479; Q5RKV4; Q9P2R3; Q9ULG5
P02792	Ferritin light chain [OS=Homo sapiens]	0	27.506	38	8	35	8	175	20	5.78	92.58	8	transport;other biological processes	non-structural extracellular;cytosol;other cytoplasmic organelle;other cell component	other molecular function	Pf00210	2512	ENSG00000087086	FTL	B2R4B9; hsa:2512; P02792; Q6IBT7; Q7Z2W1; Q86WI9; Q8WU07; Q96AU9; Q96CU0; Q9BTZ8
P50453	Serpin B9 [OS=Homo sapiens]	0.004	2.697	3	1	1	1	376	42.4	5.86	2.58	1	other biological processes	non-structural extracellular;cytosol;ER/Golgi;nucleus;other cell component	enzyme regulator activity;other molecular function	Pf00079	5272	ENSG00000170542	SERPINB9	B2RBW3; hsa:5272; P50453; Q5TD03
P13646	Keratin, type I cytoskeletal 13 [OS=Homo sapiens]	0	47.775	15	10	71	2	458	49.6	4.96	209.72	10	cell organization and biogenesis;stress response;other biological processes	cytosol;cytoskeleton	other molecular function	Pf00038	3860	ENSG00000171401	KRT13	hsa:3860; P13646; Q53G54; Q6AZK5; Q8N240
P49407	Beta-arrestin-1 [OS=Homo sapiens]	0.002	3.654	2	1	1	1	418	47	6.2	3.03	1	cell organization and biogenesis;protein metabolism;RNA metabolism OR transcription;other metabolic processes;transport;signal transduction;other biological processes	plasma membrane;other membranes;cytosol;ER/Golgi;nucleus;other cytoplasmic organelle;other cell component	signal transduction activity or receptor binding;enzyme regulator activity;other molecular function	Pf00339, Pf02752	408	ENSG00000137486	ARRB1	B6V9G8; hsa:408; O75625; O75630; P49407; Q2PP20; Q9BTK8
P19013	Keratin, type II cytoskeletal 4 [OS=Homo sapiens]	0	27.064	13	7	36	2	520	56.1	6.61	110.42	7	cell organization and biogenesis;other biological processes	cytosol;cytoskeleton;other cell component	bone, tooth or skin structural activity	Pf00038, Pf16208	3851	ENSG00000170477	KRT4	B4DRS2; F8VS64; hsa:3851; P19013; Q6GTR8; Q96LA7; Q9BTL1
P30049	ATP synthase subunit delta, mitochondrial [OS=Homo sapiens]	0.002	3.556	5	1	1	1	168	17.5	5.49	2.59	1	cell organization and biogenesis;other metabolic processes;transport;other biological processes	other membranes;mitochondrion	transporter activity	Pf02823	513	ENSG00000099624	ATP5F1D	D6W5Y3; hsa:513; P30049; Q6FG90
P53680	AP-2 complex subunit sigma [OS=Homo sapiens]	0.005	2.615	8	1	1	1	142	17	6.18	3.04	1	cell organization and biogenesis;transport;other biological processes	plasma membrane;other membranes;cytosol;other cytoplasmic organelle;other cell component	other molecular function	Pf01217	1175	ENSG00000042753	AP2S1	B2R4Z4; hsa:1175; O75977; P53680; Q6PK67
Q15493	Regucalcin [OS=Homo sapiens]	0.002	3.933	6	1	1	1	299	33.2	6.25	3.32	1	other metabolic processes;developmental processes;other biological processes	cytosol;nucleus;other cell component	enzyme regulator activity;other molecular function	Pf08450	9104	ENSG00000130988	RGN	A4FTW1; A8K271; hsa:9104; Q15493; Q53FC9; Q5JRR5

## Sheet: All Proteins
Accession	Description	Exp. q-value: Combined	Sum PEP Score	Coverage [%]	# Peptides	# PSMs	# Unique Peptides	# AAs	MW [kDa]	calc. pI	Score Sequest HT: Sequest HT	# Peptides (by Search Engine): Sequest HT	Biological Process	Cellular Component	Molecular Function	Pfam IDs	Entrez Gene ID	Ensembl Gene ID	Gene Symbol	Gene ID	Reactome Pathways	WikiPathways	# Protein Pathway Groups	# Razor Peptides	Abundance Ratio: (Hyperoxic 0-95) / (Hyperoxic 21)	Abundance Ratio: (Hyperoxic 95) / (Hyperoxic 21)	Abundance Ratio: (Hyperoxic 21) / (Hypoxic 21)	Abundance Ratio: (Hypoxic 0-21) / (Hypoxic 21)	Abundance Ratio: (Hypoxic 10) / (Hypoxic 21)	Abundance Ratio: (Hypoxic 2) / (Hypoxic 21)	Abundance Ratio Adj. P-Value: (Hyperoxic 0-95) / (Hyperoxic 21)	Abundance Ratio Adj. P-Value: (Hyperoxic 95) / (Hyperoxic 21)	Abundance Ratio Adj. P-Value: (Hyperoxic 21) / (Hypoxic 21)	Abundance Ratio Adj. P-Value: (Hypoxic 0-21) / (Hypoxic 21)	Abundance Ratio Adj. P-Value: (Hypoxic 10) / (Hypoxic 21)	Abundance Ratio Adj. P-Value: (Hypoxic 2) / (Hypoxic 21)	Abundance Ratio Variability [%]: (Hyperoxic 0-95) / (Hyperoxic 21)	Abundance Ratio Variability [%]: (Hyperoxic 95) / (Hyperoxic 21)	Abundance Ratio Variability [%]: (Hyperoxic 21) / (Hypoxic 21)	Abundance Ratio Variability [%]: (Hypoxic 0-21) / (Hypoxic 21)	Abundance Ratio Variability [%]: (Hypoxic 10) / (Hypoxic 21)	Abundance Ratio Variability [%]: (Hypoxic 2) / (Hypoxic 21)	Abundances (Grouped): Hyperoxic 0-95	Abundances (Grouped): Hyperoxic 21	Abundances (Grouped): Hyperoxic 40	Abundances (Grouped): Hyperoxic 95	Abundances (Grouped): Hypoxic 0-21	Abundances (Grouped): Hypoxic 10	Abundances (Grouped): Hypoxic 2
Q00577	Transcriptional activator protein Pur-alpha [OS=Homo sapiens]	0	15.079	14	3	6	3	322	34.9	6.44	17.77	3	cell cycle OR cell proliferation;cell organization and biogenesis;DNA metabolism;RNA metabolism OR transcription;other metabolic processes;transport;developmental processes;other biological processes	nucleus;other cell component	nucleic acid binding activity;other molecular function	Pf04845	5813	ENSG00000185129	PURA	hsa:5813; Q00577		Exercise-induced circadian regulation	1	0	0.752	0.7	1.064	1.38	1.212	1.226	0.800737	0.749766	0.988299	0.192945	0.876512	0.147732	19.11	60.02	25.32	31.05	13.72	51.97	695.3	808.5	881.2	490.5	1229.8	1017.8	1083
Annotated Sequence	Modifications	Contaminant	Qvality q-value	# Protein Groups	# Proteins	# PSMs	Master Protein Accessions	Positions in Master Proteins	Modifications in Master Proteins	# Missed Cleavages	Theo. MH+ [Da]	Abundance Ratio: (Hyperoxic 0-95) / (Hyperoxic 21)	Abundance Ratio: (Hyperoxic 95) / (Hyperoxic 21)	Abundance Ratio: (Hyperoxic 21) / (Hypoxic 21)	Abundance Ratio: (Hypoxic 0-21) / (Hypoxic 21)	Abundance Ratio: (Hypoxic 10) / (Hypoxic 21)	Abundance Ratio: (Hypoxic 2) / (Hypoxic 21)	Abundance Ratio Adj. P-Value: (Hyperoxic 0-95) / (Hyperoxic 21)	Abundance Ratio Adj. P-Value: (Hyperoxic 95) / (Hyperoxic 21)	Abundance Ratio Adj. P-Value: (Hyperoxic 21) / (Hypoxic 21)	Abundance Ratio Adj. P-Value: (Hypoxic 0-21) / (Hypoxic 21)	Abundance Ratio Adj. P-Value: (Hypoxic 10) / (Hypoxic 21)	Abundance Ratio Adj. P-Value: (Hypoxic 2) / (Hypoxic 21)	Abundance Ratio Variability [%]: (Hyperoxic 0-95) / (Hyperoxic 21)	Abundance Ratio Variability [%]: (Hyperoxic 95) / (Hyperoxic 21)	Abundance Ratio Variability [%]: (Hyperoxic 21) / (Hypoxic 21)	Abundance Ratio Variability [%]: (Hypoxic 0-21) / (Hypoxic 21)	Abundance Ratio Variability [%]: (Hypoxic 10) / (Hypoxic 21)	Abundance Ratio Variability [%]: (Hypoxic 2) / (Hypoxic 21)	Abundances (Grouped): Hyperoxic 0-95	Abundances (Grouped): Hyperoxic 21	Abundances (Grouped): Hyperoxic 40	Abundances (Grouped): Hyperoxic 95	Abundances (Grouped): Hypoxic 0-21	Abundances (Grouped): Hypoxic 10	Abundances (Grouped): Hypoxic 2	Abundances (Grouped): Hypoxic 21	Abundances (Grouped): SM	Abundances (Grouped) CV [%]: Hyperoxic 0-95	Abundances (Grouped) CV [%]: Hyperoxic 21	Abundances (Grouped) CV [%]: Hyperoxic 40	Abundances (Grouped) CV [%]: Hyperoxic 95	Abundances (Grouped) CV [%]: Hypoxic 0-21	Abundances (Grouped) CV [%]: Hypoxic 10	Abundances (Grouped) CV [%]: Hypoxic 2	Abundances (Grouped) CV [%]: Hypoxic 21	Abundances (Grouped) CV [%]: SM	Quan Info	Found in Sample: F5: 130N, Sample, Hyperoxic 0-95, D1
[K].LIDDYGVEEEPAELPEGTSLTVDNKR.[F]	1xTMT6plex [K25]; 1xTMT6plex [N-Term]	FALSE	0.000148726	1	1	3	Q00577	Q00577 [205-230]		1	3347.73	0.432	0.01	1.989	1.085	1.509	0.862	0.720435	1.02234e-16	0.883752	0.99995	0.54014	0.998215	0	0	0	0	0	0	73.5	170	137.8	0	92.7	129	73.7	85.5	91.5											n/a
[K].IAEVGAGGNK.[S]	1xTMT6plex [K10]; 1xTMT6plex [N-Term]	FALSE	0.000227648	1	1	1	Q00577	Q00577 [88-97]		0	1373.82	0.879	1.002	0.936	1.847	1.14	1.797	0.997395	0.987237	0.999998	0.131493	0.997321	0.0240618	0	0	0	0	0	0	408.2	464.1	295.3	465.2	915.5	565.3	891	495.8	367.5											n/a
[R].VSEVKPTYR.[N]	1xTMT6plex [K5]; 1xTMT6plex [N-Term]	FALSE	0.00149686	1	1	2	Q00577	Q00577 [246-254]		0	1536.91	0.916	0.713	0.829	1.346	1.119	1.208	0.998494	0.961393	0.995354	0.800865	0.997321	0.893266	14.58	62.89	5.45	22.29	6.61	48.27	461.8	503.9	651.1	359.2	817.8	679.8	734.2	607.6	539.8	15.07	1.24	30.86	54.17	14.69	12.71	37.88	6.44	21.7		n/a
Q9UGI8	Testin [OS=Homo sapiens]	0.002	3.386	2	1	2	1	421	48	7.68	2.58	1	other biological processes	plasma membrane;other membranes;cytosol;other cell component	other molecular function	Pf00412, Pf06297	26136	ENSG00000135269	TES	A4D0U6; hsa:26136; Q9GZQ1; Q9HAJ9; Q9UGI8			0	0	1.013	0.694	2.207	1.371	0.901	1.405	0.936371	0.908451	0.622244	0.729276	0.963396	0.376898	21.08	76.19	17.65	38.1	10.41	49	252	248.8	202.6	172.8	154.5	101.6	158.4
Annotated Sequence	Modifications	Contaminant	Qvality q-value	# Protein Groups	# Proteins	# PSMs	Master Protein Accessions	Positions in Master Proteins	Modifications in Master Proteins	# Missed Cleavages	Theo. MH+ [Da]	Abundance Ratio: (Hyperoxic 0-95) / (Hyperoxic 21)	Abundance Ratio: (Hyperoxic 95) / (Hyperoxic 21)	Abundance Ratio: (Hyperoxic 21) / (Hypoxic 21)	Abundance Ratio: (Hypoxic 0-21) / (Hypoxic 21)	Abundance Ratio: (Hypoxic 10) / (Hypoxic 21)	Abundance Ratio: (Hypoxic 2) / (Hypoxic 21)	Abundance Ratio Adj. P-Value: (Hyperoxic 0-95) / (Hyperoxic 21)	Abundance Ratio Adj. P-Value: (Hyperoxic 95) / (Hyperoxic 21)	Abundance Ratio Adj. P-Value: (Hyperoxic 21) / (Hypoxic 21)	Abundance Ratio Adj. P-Value: (Hypoxic 0-21) / (Hypoxic 21)	Abundance Ratio Adj. P-Value: (Hypoxic 10) / (Hypoxic 21)	Abundance Ratio Adj. P-Value: (Hypoxic 2) / (Hypoxic 21)	Abundance Ratio Variability [%]: (Hyperoxic 0-95) / (Hyperoxic 21)	Abundance Ratio Variability [%]: (Hyperoxic 95) / (Hyperoxic 21)	Abundance Ratio Variability [%]: (Hyperoxic 21) / (Hypoxic 21)	Abundance Ratio Variability [%]: (Hypoxic 0-21) / (Hypoxic 21)	Abundance Ratio Variability [%]: (Hypoxic 10) / (Hypoxic 21)	Abundance Ratio Variability [%]: (Hypoxic 2) / (Hypoxic 21)	Abundances (Grouped): Hyperoxic 0-95	Abundances (Grouped): Hyperoxic 21	Abundances (Grouped): Hyperoxic 40	Abundances (Grouped): Hyperoxic 95	Abundances (Grouped): Hypoxic 0-21	Abundances (Grouped): Hypoxic 10	Abundances (Grouped): Hypoxic 2	Abundances (Grouped): Hypoxic 21	Abundances (Grouped): SM	Abundances (Grouped) CV [%]: Hyperoxic 0-95	Abundances (Grouped) CV [%]: Hyperoxic 21	Abundances (Grouped) CV [%]: Hyperoxic 40	Abundances (Grouped) CV [%]: Hyperoxic 95	Abundances (Grouped) CV [%]: Hypoxic 0-21	Abundances (Grouped) CV [%]: Hypoxic 10	Abundances (Grouped) CV [%]: Hypoxic 2	Abundances (Grouped) CV [%]: Hypoxic 21	Abundances (Grouped) CV [%]: SM	Quan Info	Found in Sample: F5: 130N, Sample, Hyperoxic 0-95, D1
[K].EGDPAIYAER.[A]	1xTMT6plex [N-Term]	FALSE	0.000283189	1	1	2	Q9UGI8	Q9UGI8 [245-254]		0	1349.69	1.013	0.694	2.207	1.371	0.901	1.405	0.990999	0.974249	0.764598	0.917486	0.997321	0.38762	21.08	76.19	17.65	38.1	10.41	49	252	248.8	202.6	172.8	154.5	101.6	158.4	112.7	140.5	65.91	49.23	90.34	18.32	1.37	24.41	11.32	33.91	18.85		High
Q13185	Chromobox protein homolog 3 [OS=Homo sapiens]	0.001	7.128	14	2	2	2	183	20.8	5.33	7.2	2	cell organization and biogenesis;stress response;other biological processes	other membranes;cytoskeleton;nucleus;other cell component	other molecular function	Pf00385, Pf01393	11335	ENSG00000122565	CBX3	hsa:11335; Q13185; Q96CD7; Q99409; Q9BVS3; Q9P0Z6	RNA Polymerase I Promoter Escape; ERCC6 (CSB) and EHMT2 (G9a) positively regulate rRNA expression; Transcriptional Regulation by E2F6	Exercise-induced circadian regulation; Effect of progerin on genes involved in Hutchinson-Gilford progeria syndrome; NIPBL role in DNA damage - Cornelia de Lange syndrome	6	0	1.501	0.01	0.511	1.211	0.963	0.796	0.374899	1.92581e-16	0.426094	0.796555	0.988922	0.452567	0	0	0	0	0	0	428.4	285.4	276.6	0	675.8	537.7	444.2
Annotated Sequence	Modifications	Contaminant	Qvality q-value	# Protein Groups	# Proteins	# PSMs	Master Protein Accessions	Positions in Master Proteins	Modifications in Master Proteins	# Missed Cleavages	Theo. MH+ [Da]	Abundance Ratio: (Hyperoxic 0-95) / (Hyperoxic 21)	Abundance Ratio: (Hyperoxic 95) / (Hyperoxic 21)	Abundance Ratio: (Hyperoxic 21) / (Hypoxic 21)	Abundance Ratio: (Hypoxic 0-21) / (Hypoxic 21)	Abundance Ratio: (Hypoxic 10) / (Hypoxic 21)	Abundance Ratio: (Hypoxic 2) / (Hypoxic 21)	Abundance Ratio Adj. P-Value: (Hyperoxic 0-95) / (Hyperoxic 21)	Abundance Ratio Adj. P-Value: (Hyperoxic 95) / (Hyperoxic 21)	Abundance Ratio Adj. P-Value: (Hyperoxic 21) / (Hypoxic 21)	Abundance Ratio Adj. P-Value: (Hypoxic 0-21) / (Hypoxic 21)	Abundance Ratio Adj. P-Value: (Hypoxic 10) / (Hypoxic 21)	Abundance Ratio Adj. P-Value: (Hypoxic 2) / (Hypoxic 21)	Abundance Ratio Variability [%]: (Hyperoxic 0-95) / (Hyperoxic 21)	Abundance Ratio Variability [%]: (Hyperoxic 95) / (Hyperoxic 21)	Abundance Ratio Variability [%]: (Hyperoxic 21) / (Hypoxic 21)	Abundance Ratio Variability [%]: (Hypoxic 0-21) / (Hypoxic 21)	Abundance Ratio Variability [%]: (Hypoxic 10) / (Hypoxic 21)	Abundance Ratio Variability [%]: (Hypoxic 2) / (Hypoxic 21)	Abundances (Grouped): Hyperoxic 0-95	Abundances (Grouped): Hyperoxic 21	Abundances (Grouped): Hyperoxic 40	Abundances (Grouped): Hyperoxic 95	Abundances (Grouped): Hypoxic 0-21	Abundances (Grouped): Hypoxic 10	Abundances (Grouped): Hypoxic 2	Abundances (Grouped): Hypoxic 21	Abundances (Grouped): SM	Abundances (Grouped) CV [%]: Hyperoxic 0-95	Abundances (Grouped) CV [%]: Hyperoxic 21	Abundances (Grouped) CV [%]: Hyperoxic 40	Abundances (Grouped) CV [%]: Hyperoxic 95	Abundances (Grouped) CV [%]: Hypoxic 0-21	Abundances (Grouped) CV [%]: Hypoxic 10	Abundances (Grouped) CV [%]: Hypoxic 2	Abundances (Grouped) CV [%]: Hypoxic 21	Abundances (Grouped) CV [%]: SM	Quan Info	Found in Sample: F5: 130N, Sample, Hyperoxic 0-95, D1
[K].WKDSDEADLVLAK.[E]	2xTMT6plex [K2; K13]; 1xTMT6plex [N-Term]	FALSE	0.000148726	1	1	1	Q13185	Q13185 [142-154]		1	2177.24	1.501	0.01	0.511	1.211	0.963	0.796	0.747647	1.02234e-16	0.853828	0.984979	0.999885	0.928754	0	0	0	0	0	0	428.4	285.4	276.6	0	675.8	537.7	444.2	558.3	514.4											n/a
[K].VEEAEPEEFVVEK.[V]	1xTMT6plex [K13]; 1xTMT6plex [N-Term]	FALSE	0.000964462	1	1	1	Q13185	Q13185 [22-34]		0	1992.06																																					No Quan Values	n/a
P57105	Synaptojanin-2-binding protein [OS=Homo sapiens]	0.001	7.358	26	3	5	3	145	15.9	6.3	9.52	3	cell adhesion;cell-cell signaling;transport;signal transduction;other biological processes	plasma membrane;other membranes;mitochondrion;other cell component		Pf00595	55333	ENSG00000213463	SYNJ2BP	hsa:55333; P57105; Q49SH3; Q96IA4			0	0	1.16	1.953	1.296	1.062	1.034	1.14	0.785098	0.268874	0.970463	0.969764	0.988922	0.867792	52.31	0.57	56.01	8.47	1.62	33.43	365.8	315.3	492.1	615.7	258.3	251.7	277.5
Annotated Sequence	Modifications	Contaminant	Qvality q-value	# Protein Groups	# Proteins	# PSMs	Master Protein Accessions	Positions in Master Proteins	Modifications in Master Proteins	# Missed Cleavages	Theo. MH+ [Da]	Abundance Ratio: (Hyperoxic 0-95) / (Hyperoxic 21)	Abundance Ratio: (Hyperoxic 95) / (Hyperoxic 21)	Abundance Ratio: (Hyperoxic 21) / (Hypoxic 21)	Abundance Ratio: (Hypoxic 0-21) / (Hypoxic 21)	Abundance Ratio: (Hypoxic 10) / (Hypoxic 21)	Abundance Ratio: (Hypoxic 2) / (Hypoxic 21)	Abundance Ratio Adj. P-Value: (Hyperoxic 0-95) / (Hyperoxic 21)	Abundance Ratio Adj. P-Value: (Hyperoxic 95) / (Hyperoxic 21)	Abundance Ratio Adj. P-Value: (Hyperoxic 21) / (Hypoxic 21)	Abundance Ratio Adj. P-Value: (Hypoxic 0-21) / (Hypoxic 21)	Abundance Ratio Adj. P-Value: (Hypoxic 10) / (Hypoxic 21)	Abundance Ratio Adj. P-Value: (Hypoxic 2) / (Hypoxic 21)	Abundance Ratio Variability [%]: (Hyperoxic 0-95) / (Hyperoxic 21)	Abundance Ratio Variability [%]: (Hyperoxic 95) / (Hyperoxic 21)	Abundance Ratio Variability [%]: (Hyperoxic 21) / (Hypoxic 21)	Abundance Ratio Variability [%]: (Hypoxic 0-21) / (Hypoxic 21)	Abundance Ratio Variability [%]: (Hypoxic 10) / (Hypoxic 21)	Abundance Ratio Variability [%]: (Hypoxic 2) / (Hypoxic 21)	Abundances (Grouped): Hyperoxic 0-95	Abundances (Grouped): Hyperoxic 21	Abundances (Grouped): Hyperoxic 40	Abundances (Grouped): Hyperoxic 95	Abundances (Grouped): Hypoxic 0-21	Abundances (Grouped): Hypoxic 10	Abundances (Grouped): Hypoxic 2	Abundances (Grouped): Hypoxic 21	Abundances (Grouped): SM	Abundances (Grouped) CV [%]: Hyperoxic 0-95	Abundances (Grouped) CV [%]: Hyperoxic 21	Abundances (Grouped) CV [%]: Hyperoxic 40	Abundances (Grouped) CV [%]: Hyperoxic 95	Abundances (Grouped) CV [%]: Hypoxic 0-21	Abundances (Grouped) CV [%]: Hypoxic 10	Abundances (Grouped) CV [%]: Hypoxic 2	Abundances (Grouped) CV [%]: Hypoxic 21	Abundances (Grouped) CV [%]: SM	Quan Info	Found in Sample: F5: 130N, Sample, Hyperoxic 0-95, D1
[R].IKENGAAALDGR.[L]	1xTMT6plex [K2]; 1xTMT6plex [N-Term]	FALSE	0.000357242	1	1	1	P57105	P57105 [47-58]		1	1672.97																																					No Quan Values	High
[K].NLLHQDAVDLFR.[N]	1xTMT6plex [N-Term]	FALSE	0.000964462	1	1	3	P57105	P57105 [75-86]		0	1669.92	1.16	1.953	1.296	1.062	1.034	1.14	0.973753	0.251879	0.995354	0.99995	0.999112	0.99185	52.31	0.57	56.01	8.47	1.62	33.43	365.8	315.3	492.1	615.7	258.3	251.7	277.5	243.4	271.1	87.42	50.81	44.83	51.28	94.1	88.5	67.75	89.43	79.01		High
[R].VDYLVTEEEINLTR.[G]	1xTMT6plex [N-Term]	FALSE	0.00206354	1	1	1	P57105	P57105 [5-18]		0	1923.03																																					No Quan Values	n/a
P45974	Ubiquitin carboxyl-terminal hydrolase 5 [OS=Homo sapiens]	0	47.126	20	12	28	12	858	95.7	5.03	93.59	12	protein metabolism;other metabolic processes;other biological processes	cytosol;nucleus;other cytoplasmic organelle	other molecular function	Pf00443, Pf00627, Pf02148, Pf17807	8078	ENSG00000111667	USP5	D3DUS7; D3DUS8; hsa:8078; P45974; Q96J22	Ub-specific processing proteases; Synthesis of active ubiquitin: roles of E1 and E2 enzymes	IL-18 signaling pathway	3	0	0.934	1.432	0.698	1.133	1.053	1.01	0.998022	0.437315	0.842617	0.820311	0.988922	0.963668	15.38	38.72	82.72	10.92	5.78	35.91	1015.9	1208	954.7	1296.4	2316.3	2488.7	2165.5
Annotated Sequence	Modifications	Contaminant	Qvality q-value	# Protein Groups	# Proteins	# PSMs	Master Protein Accessions	Positions in Master Proteins	Modifications in Master Proteins	# Missed Cleavages	Theo. MH+ [Da]	Abundance Ratio: (Hyperoxic 0-95) / (Hyperoxic 21)	Abundance Ratio: (Hyperoxic 95) / (Hyperoxic 21)	Abundance Ratio: (Hyperoxic 21) / (Hypoxic 21)	Abundance Ratio: (Hypoxic 0-21) / (Hypoxic 21)	Abundance Ratio: (Hypoxic 10) / (Hypoxic 21)	Abundance Ratio: (Hypoxic 2) / (Hypoxic 21)	Abundance Ratio Adj. P-Value: (Hyperoxic 0-95) / (Hyperoxic 21)	Abundance Ratio Adj. P-Value: (Hyperoxic 95) / (Hyperoxic 21)	Abundance Ratio Adj. P-Value: (Hyperoxic 21) / (Hypoxic 21)	Abundance Ratio Adj. P-Value: (Hypoxic 0-21) / (Hypoxic 21)	Abundance Ratio Adj. P-Value: (Hypoxic 10) / (Hypoxic 21)	Abundance Ratio Adj. P-Value: (Hypoxic 2) / (Hypoxic 21)	Abundance Ratio Variability [%]: (Hyperoxic 0-95) / (Hyperoxic 21)	Abundance Ratio Variability [%]: (Hyperoxic 95) / (Hyperoxic 21)	Abundance Ratio Variability [%]: (Hyperoxic 21) / (Hypoxic 21)	Abundance Ratio Variability [%]: (Hypoxic 0-21) / (Hypoxic 21)	Abundance Ratio Variability [%]: (Hypoxic 10) / (Hypoxic 21)	Abundance Ratio Variability [%]: (Hypoxic 2) / (Hypoxic 21)	Abundances (Grouped): Hyperoxic 0-95	Abundances (Grouped): Hyperoxic 21	Abundances (Grouped): Hyperoxic 40	Abundances (Grouped): Hyperoxic 95	Abundances (Grouped): Hypoxic 0-21	Abundances (Grouped): Hypoxic 10	Abundances (Grouped): Hypoxic 2	Abundances (Grouped): Hypoxic 21	Abundances (Grouped): SM	Abundances (Grouped) CV [%]: Hyperoxic 0-95	Abundances (Grouped) CV [%]: Hyperoxic 21	Abundances (Grouped) CV [%]: Hyperoxic 40	Abundances (Grouped) CV [%]: Hyperoxic 95	Abundances (Grouped) CV [%]: Hypoxic 0-21	Abundances (Grouped) CV [%]: Hypoxic 10	Abundances (Grouped) CV [%]: Hypoxic 2	Abundances (Grouped) CV [%]: Hypoxic 21	Abundances (Grouped) CV [%]: SM	Quan Info	Found in Sample: F5: 130N, Sample, Hyperoxic 0-95, D1
[R].GTGLQPGEEELPDIAPPLVTPDEPK.[G]	1xTMT6plex [K25]; 1xTMT6plex [N-Term]	FALSE	0.000148726	1	1	4	P45974	P45974 [604-628]		0	3057.64	0.401	0.069	0.884	0.958	0.883	0.882	0.802547	0.102294	0.995354	0.99995	0.997321	0.99998	133.47	503.36	18.41	23.56	10.3	20.68	29.9	74.6	15.3	45.9	80.9	74.6	74.5	84.5	81.1	72.07	34.22			38.76	26.87	36.23	17.3	28.8		High
[K].LGHGLLSGEYSKPVPESGDGERVPEQK.[E]	2xTMT6plex [K12; K27]; 1xTMT6plex [N-Term]	FALSE	0.000148726	1	1	1	P45974	P45974 [380-406]		1	3552.93	0.222	0.01	1.194	1.284	1.06	0.738	0.038022	1.02234e-16	0.995354	0.922304	0.999112	0.683273	0	0	0	0	0	0	87.2	393	402.4	0	422.9	349	242.9	329.3	307.7											n/a
[K].IFQNAPTDPTQDFSTQVAK.[L]	1xTMT6plex [K19]; 1xTMT6plex [N-Term]	FALSE	0.000148726	1	1	3	P45974	P45974 [361-379]		0	2566.36	0.418	0.634	1.269	1.458	1.144	0.795	0.540672	0.953994	0.995354	0.63174	0.997321	0.942563	58.65	56.44	15	47.94	42.23	12.35	108.4	208.6	269.8	125.5	468.4	433	199.3	250.6	522	41.14	52.36	69.8	68.85	64.65	69.87	81.02	70.69	55.24		n/a
[R].DGLGGLPDIVR.[D]	1xTMT6plex [N-Term]	FALSE	0.000148726	1	1	4	P45974	P45974 [134-144]		0	1340.77	1.17	0.941	0.306	0.9	1.033	1.016	0.965671	0.999966	0.46719	0.99995	0.999697	0.99998	40.97	146.87	124.83	12.82	6.82	37.71	107.9	162.3	0	191.5	249.6	311.4	228.4	301.4	375.1	97.35	72.37		46.11	55.21	34.45	41.57	45.95	23.17		High
[R].VTSAVEALLSADSASR.[K]	1xTMT6plex [N-Term]	FALSE	0.000227648	1	1	2	P45974	P45974 [147-162]		0	1805.98	0.803	1.749	1.373	1.121	1.046	1.018	0.979403	0.511205	0.995354	0.99995	0.999112	0.99998	0	0	0	0	0	0	579.9	722.1	704.3	1262.8	589.2	550	535.3	525.8	491.9											n/a
[R].YFDGSGGNNHAVEHYR.[E]	1xTMT6plex [N-Term]	FALSE	0.000227648	1	1	2	P45974	P45974 [223-238]		0	2051.95	0.957	0.913	1.882	1.087	1.168	1.65	0.996046	0.999237	0.911096	0.99995	0.995205	0.0949308	0	0	0	0	0	0	274.2	286.4	355.3	261.4	165.5	177.8	251.1	152.2	197.4											High
[R].KQEVQAWDGEVR.[Q]	1xTMT6plex [K1]; 1xTMT6plex [N-Term]	FALSE	0.000227648	1	1	1	P45974	P45974 [163-174]		1	1903.04	0.765	0.7	1.58	1.629	0.983	1.626	0.979403	0.981213	0.937119	0.339989	0.999975	0.0785673	0	0	0	0	0	0	311.5	407.3	91.3	285.1	420	253.5	419.1	257.8	605.7											n/a
[R].SSENPNEVFR.[F]	1xTMT6plex [N-Term]	FALSE	0.000227648	1	1	4	P45974	P45974 [453-462]		0	1407.71	1.31	1.807	0.625	1.083	1.066	0.982	0.836633	0.469109	0.984809	0.99995	0.999112	0.99998	48.84	77.11	83.63	7.63	21.04	17.17	269.1	306.4	214.2	265.6	403.8	453.8	366.3	373	400.4	58.28	70.4	8.33	72.76	60.61	59.54	37.33	55.74	29.54		High
[R].ETGYPLAVK.[L]	1xTMT6plex [K9]; 1xTMT6plex [N-Term]	FALSE	0.000227648	1	1	2	P45974	P45974 [239-247]		0	1435.86	2.486	1	0.043	1.104	1.084	0.882	0.203965	0.987237	1.03255e-05	0.99995	0.999112	0.99998	0	7412.26	299.85	8.05	1.39	20.22	240.6	96.8	84.9	218.6	518.2	508.5	413.8	469.2	508.7					24.29	15.47	2.37	16.78	20.41		n/a
[K].EVQDGIAPR.[M]	1xTMT6plex [N-Term]	FALSE	0.000283189	1	1	3	P45974	P45974 [407-415]		0	1213.67	1.452	7.3	0.411	1.075	1.434	0.911	0.892825	0.0346158	0.64463	0.99995	0.518576	0.99998	23.14	11.18	123.15	24.57	49.24	42.09	117.7	81.1	128	163.6	171.9	189.1	155	191.7	170.2	57.2	59.4	21.57	100.34	29.19	41.32	11.05	63.43	44.45		High
[K].QLDNPAR.[I]	1xTMT6plex [N-Term]	FALSE	0.00857365	1	1	1	P45974	P45974 [185-191]		0	1042.58	0.592	1.432	0.763	1.089	0.972	1.013	0.924399	0.765365	0.995354	0.99995	0.999697	0.99998	0	0	0	0	0	0	124.5	210.2	253.6	301.1	300	267.8	279.3	275.6	279.9											High
[R].KYVDKLEK.[I]	3xTMT6plex [K1; K5; K8]; 1xTMT6plex [N-Term]	FALSE	0.00967317	1	1	1	P45974	P45974 [353-360]		2	1939.24	0.911	2.987	0.48	1.234	0.867	0.733	1	0.0393873	0.87566	0.982859	0.999112	0.632685	0	0	0	0	0	0	192.6	211.3	27.9	631.3	543.2	381.8	322.5	440.1	413.6											n/a
P04075	Fructose-bisphosphate aldolase A [OS=Homo sapiens]	0	175.456	79	28	167	23	364	39.4	8.09	659.56	28	cell organization and biogenesis;other metabolic processes;other biological processes	non-structural extracellular;cytosol;cytoskeleton;other cell component	cytoskeletal activity;other molecular function	Pf00274	226	ENSG00000149925	ALDOA	B4DXI7; hsa:226; P04075; Q6FH76; Q6FI10; Q96B15; Q9BWD9; Q9UCN2	Neutrophil degranulation; Glycolysis; Platelet degranulation ; Gluconeogenesis	VEGFA-VEGFR2 signaling; Clear cell renal cell carcinoma pathways; Aerobic glycolysis; 16p11.2 proximal deletion syndrome; Glycolysis and gluconeogenesis; Sudden infant death syndrome (SIDS) susceptibility pathways	10	7	1.07	0.818	0.777	1.058	1.108	0.9	0.902277	0.792057	0.925909	0.963459	0.973075	0.819577	0.93	65.51	38.31	11.78	28.46	6.86	7295.9	5198.6	4980.2	4524.9	18529	20009.1	14788.9
Annotated Sequence	Modifications	Contaminant	Qvality q-value	# Protein Groups	# Proteins	# PSMs	Master Protein Accessions	Positions in Master Proteins	Modifications in Master Proteins	# Missed Cleavages	Theo. MH+ [Da]	Abundance Ratio: (Hyperoxic 0-95) / (Hyperoxic 21)	Abundance Ratio: (Hyperoxic 95) / (Hyperoxic 21)	Abundance Ratio: (Hyperoxic 21) / (Hypoxic 21)	Abundance Ratio: (Hypoxic 0-21) / (Hypoxic 21)	Abundance Ratio: (Hypoxic 10) / (Hypoxic 21)	Abundance Ratio: (Hypoxic 2) / (Hypoxic 21)	Abundance Ratio Adj. P-Value: (Hyperoxic 0-95) / (Hyperoxic 21)	Abundance Ratio Adj. P-Value: (Hyperoxic 95) / (Hyperoxic 21)	Abundance Ratio Adj. P-Value: (Hyperoxic 21) / (Hypoxic 21)	Abundance Ratio Adj. P-Value: (Hypoxic 0-21) / (Hypoxic 21)	Abundance Ratio Adj. P-Value: (Hypoxic 10) / (Hypoxic 21)	Abundance Ratio Adj. P-Value: (Hypoxic 2) / (Hypoxic 21)	Abundance Ratio Variability [%]: (Hyperoxic 0-95) / (Hyperoxic 21)	Abundance Ratio Variability [%]: (Hyperoxic 95) / (Hyperoxic 21)	Abundance Ratio Variability [%]: (Hyperoxic 21) / (Hypoxic 21)	Abundance Ratio Variability [%]: (Hypoxic 0-21) / (Hypoxic 21)	Abundance Ratio Variability [%]: (Hypoxic 10) / (Hypoxic 21)	Abundance Ratio Variability [%]: (Hypoxic 2) / (Hypoxic 21)	Abundances (Grouped): Hyperoxic 0-95	Abundances (Grouped): Hyperoxic 21	Abundances (Grouped): Hyperoxic 40	Abundances (Grouped): Hyperoxic 95	Abundances (Grouped): Hypoxic 0-21	Abundances (Grouped): Hypoxic 10	Abundances (Grouped): Hypoxic 2	Abundances (Grouped): Hypoxic 21	Abundances (Grouped): SM	Abundances (Grouped) CV [%]: Hyperoxic 0-95	Abundances (Grouped) CV [%]: Hyperoxic 21	Abundances (Grouped) CV [%]: Hyperoxic 40	Abundances (Grouped) CV [%]: Hyperoxic 95	Abundances (Grouped) CV [%]: Hypoxic 0-21	Abundances (Grouped) CV [%]: Hypoxic 10	Abundances (Grouped) CV [%]: Hypoxic 2	Abundances (Grouped) CV [%]: Hypoxic 21	Abundances (Grouped) CV [%]: SM	Quan Info	Found in Sample: F5: 130N, Sample, Hyperoxic 0-95, D1
[K].FSHEEIAMATVTALR.[R]	1xOxidation [M8]; 1xTMT6plex [N-Term]	FALSE	0.000148726	1	1	2	P04075	P04075 [244-258]		0	1921.01	0.437	0.085	0.921	1.206	1.207	0.973	0.535159	0.0015456	0.999998	0.99949	0.945445	0.99998	2.82	624.71	57.94	15.32	4.98	17.91	122.4	280.1	197.5	118.9	366.8	367.2	295.9	304.2	286.6	71.95	69.93	5.91		36.45	17.86	5.65	22.51	42.53		High
[K].FSHEEIAMATVTALR.[R]	1xTMT6plex [N-Term]	FALSE	0.000148726	1	1	5	P04075	P04075 [244-258]		0	1905.01	0.972	1	0.939	1.141	1.011	0.944	0.998494	0.987237	0.99766	0.99995	0.999885	0.99998	12.42	19.32	27.33	10.25	2.22	18.59	167.4	222.4	179.9	165.9	313.7	311.8	230.6	275	303.6	26.58	27.25	25.94	27.01	35.04	47.68	32.71	47.77	18.97		High
[K].FSHEEIAMATVTALRR.[T]	1xTMT6plex [N-Term]	FALSE	0.000148726	1	1	6	P04075	P04075 [244-259]		1	2061.11	0.68	1.28	0.948	1.178	1.39	1.131	0.979403	0.876959	0.99766	0.99995	0.631029	0.97729	14.53	62.53	10.62	10.2	34.91	21.17	122.9	180.7	273.1	231.3	224.6	265	215.6	190.6	205.1	4.68	9.14	4.51	62.53	8.75	33.33	20.93	0.97	4.37		High
[K].RLQSIGTENTEENRR.[F]	1xTMT6plex [N-Term]	FALSE	0.000148726	1	1	6	P04075	P04075 [43-57]		2	2032.07	0.728	0.841	0.942	1.208	1.037	1.091	0.979403	0.999966	0.999998	0.999125	0.999112	0.99093	22.12	3.66	19.83	3.25	7.14	14.25	316.7	435.1	201.2	365.9	558.2	479.2	504.3	462.1	504.6	21.61	41.54	14.7	38.33	20.69	17.05	10.35	23.72	22.28		High
[K].GVVPLAGTNGETTTQGLDGLSER.[C]	1xDeamidated [N9]; 1xTMT6plex [N-Term]	FALSE	0.000148726	1	1	5	P04075	P04075 [112-134]		0	2502.29	0.475	0.199	2.501	1.463	1.691	0.881	0.850827	0.567359	0.772822	0.736867	0.346383	0.99998	0	0	0	0	0	0	59.7	125.8	0	25	73.6	85	44.3	50.3	115.3											High
[K].GVVPLAGTNGETTTQGLDGLSER.[C]	1xTMT6plex [N-Term]	FALSE	0.000148726	1	1	9	P04075	P04075 [112-134]		0	2501.3	0.525	0.514	1.237	1.313	1.296	1.079	0.851936	0.827071	0.995354	0.890636	0.795089	0.997441	7.7	5.99	62.51	23.15	13.82	25.03	173.1	282.2	197.9	178.4	425.7	329.6	302.6	280.5	318.7	55.2	30.65	76.71	75.73	68.45	82.02	89.12	67.61	52.24		High
[R].LQSIGTENTEENR.[R]	1xTMT6plex [N-Term]	FALSE	0.000148726	1	1	3	P04075	P04075 [44-56]		0	1719.87	12.208	2.157	0.061	0.715	0.9	0.839	0.0189351	0.790932	2.77377e-05	0.486512	0.999112	0.97528	598.17	0	441.72	62.54	59.67	8.52	46.2	37.2	66.1	80.3	158.4	199.4	185.9	221.6	217.7	25.59				52.79	117.67	98.46	94.11	101.1		High
[R].LQSIGTENTEENRR.[F]	1xTMT6plex [N-Term]	FALSE	0.000148726	1	1	11	P04075	P04075 [44-57]		1	1875.97	0.771	0.774	0.739	0.961	1.203	1.069	0.99077	0.998582	0.995354	0.99995	0.945445	0.99998	33.97	31.08	57.18	7.32	4.36	37.43	387.2	387.2	207.8	299.8	362	466.5	402.6	376.5	638	61.08	46.59	44.36	23.67	60.97	63.92	30.28	56.24	49.46		High
[K].IGEHTPSALAIMENANVLAR.[Y]	1xTMT6plex [N-Term]	FALSE	0.000148726	1	1	6	P04075	P04075 [154-173]		0	2336.26	1.282	0.725	0.544	1.415	1.49	0.905	0.904323	0.998541	0.91604	0.703612	0.395609	0.99998	2.18	56	54.14	34.88	22.61	26.31	214.7	167.5	140.1	121.5	436	459.4	278.8	308.2	293.2	41.99	40.08	97	10.99	23.41	30.35	33.65	9.33	7.16		High
[K].IGEHTPSALAIMENANVLAR.[Y]	1xDeamidated [N14]; 1xTMT6plex [N-Term]	FALSE	0.000148726	1	1	1	P04075	P04075 [154-173]		0	2337.24	1.55	0.361	0.372	1.933	1.053	0.891	0.818697	0.908668	0.533664	0.0845671	0.999112	0.99998	0	0	0	0	0	0	133.6	86.2	40.4	31.1	447.7	244	206.3	231.6	218.9											n/a
[K].IGEHTPSALAIMENANVLAR.[Y]	1xOxidation [M12]; 1xTMT6plex [N-Term]	FALSE	0.000148726	1	1	5	P04075	P04075 [154-173]		0	2352.25	0.64	0.637	0.996	1.166	1.377	0.925	0.939153	0.937751	0.99766	0.99995	0.607987	0.99998	0.53	52.8	8.22	48.67	10.89	6.21	199	310.9	318.9	107.5	384.2	453.6	324.4	329.5	411	70.06	59.25	66.44	90.1	89.65	75.24	61.33	60.92	50.89		High
[K].GILAADESTGSIAKR.[L]	1xTMT6plex [K14]; 1xTMT6plex [N-Term]	FALSE	0.000148726	1	1	4	P04075	P04075 [29-43]		1	1947.13	1.946	2.361	0.304	0.953	1.151	1.139	0.459255	0.418657	0.374005	0.99995	0.961765	0.957153	88.43	201.34	223.11	11.36	86.42	6.65	200.4	102.9	151.8	243	322.4	389.4	385.3	338.3	479	85.95	120.79	28.03	22.13	0.41	63.16	4.08	10.4	74.35		High
[K].GILAADESTGSIAK.[R]	1xTMT6plex [K14]; 1xTMT6plex [N-Term]	FALSE	0.000148726	1	1	5	P04075	P04075 [29-42]		0	1791.03	0.683	0.511	0.862	1.075	0.954	0.776	0.984085	0.95497	0.997233	0.99995	0.999975	0.846	59.29	80.82	57.87	3.18	39.94	14.79	108.8	117.4	168.5	61.7	379.9	352.3	286.6	345.9	336.5	52.58	83.48		4.08	70.87	71.04	65.54	59.74	17.07		High
[K].VDKGVVPLAGTNGETTTQGLDGLSER.[C]	1xTMT6plex [K3]; 1xTMT6plex [N-Term]	FALSE	0.000148726	1	1	4	P04075	P04075 [109-134]		1	3072.66	0.741	0.01	0.726	1.35	1.251	1.291	0.996046	1.02234e-16	0.991227	0.935093	0.971934	0.705784	58.47	0	112.17	14.23	50.59	19.75	56.9	76.7	0	0	142.8	132.3	136.5	105.8	258.9	60.03	9.65			87.76	105.57	65.05	78.93	12.43		n/a
[R].YASICQQNGIVPIVEPEILPDGDHDLKR.[C]	1xDeamidated [N8]; 1xMethylthio [C5]; 1xTMT6plex [K27]; 1xTMT6plex [N-Term]	FALSE	0.000148726	2	2	7	P04075; P09972	P04075 [174-201]; P09972 [174-201]	P04075 1xMethylthio [C178]; P09972 1xMethylthio [C178]	1	3624.88	0.09	0.071	0.538	1.051	0.926	1	2.19419e-05	0.00449201	0.934704	0.99995	0.999112	0.99998	655.88	513.4	61.87	22.33	16.31	30.33	126.1	174.5	222.9	78.5	341	300.4	324.5	324.4	294.6		14.76	74.42		21.24	26.76	13.83	41.37	37.15	Shared	n/a
[R].YASICQQNGIVPIVEPEILPDGDHDLKR.[C]	2xDeamidated [Q6; N/Q]; 1xMethylthio [C5]; 1xTMT6plex [K27]; 1xTMT6plex [N-Term]	FALSE	0.000148726	2	2	2	P04075; P09972	P04075 [174-201]; P09972 [174-201]	P04075 1xMethylthio [C178]; P09972 1xMethylthio [C178]	1	3625.86	1.826	6.654	0.088	0.854	0.693	0.86	0.968571	0.333082	0.0102001	0.945834	0.527625	0.99998	0	0	0	0	0	0	22.6	12.4	54	82.3	119.4	96.9	120.2	139.7	112.9										Shared	n/a
[R].YASICQQNGIVPIVEPEILPDGDHDLKR.[C]	1xMethylthio [C5]; 1xTMT6plex [K27]; 1xTMT6plex [N-Term]	FALSE	0.000148726	2	2	2	P04075; P09972	P04075 [174-201]; P09972 [174-201]	P04075 1xMethylthio [C178]; P09972 1xMethylthio [C178]	1	3623.9	0.101	0.01	0.633	1.153	1.133	0.951	0.0255028	1.02234e-16	0.995354	0.99995	0.999112	0.99998	740	0	25.72	39.51	56.62	31.36	74.3	45.9	90	0	83.6	82.2	69	72.5	66.7		61.42	28.29		50.6	36.57	57.06	79.68	55.79	Shared	n/a
[K].YTPSGQAGAAASESLFVSNHAY.[-]	1xTMT6plex [N-Term]	FALSE	0.000148726	1	1	14	P04075	P04075 [343-364]		0	2457.19	1.594	1.893	0.816	1.227	1.161	1.039	0.689743	0.352337	0.99766	0.984274	0.93991	0.99998	40.73	29.68	11.56	12.89	23.66	2.16	428.5	268.8	269.1	509	403.9	382.2	342.3	329.3	373.7	34.57	3.09	24.72	30.72	4.36	29.94	9.97	7.91	0.84		High
[K].YTPSGQAGAAASESLFVSNHAY.[-]	1xDeamidated [N19]; 1xTMT6plex [N-Term]	FALSE	0.000148726	1	1	1	P04075	P04075 [343-364]		0	2458.17	0.513	0.345	1.622	1.581	1.216	1.065	0.880907	0.728585	0.986071	0.592237	0.997321	0.99998	0	0	0	0	0	0	71.7	139.7	108.3	48.2	136.2	104.8	91.8	86.1	129.2											n/a
[K].ADDGRPFPQVIK.[S]	1xTMT6plex [K12]; 1xTMT6plex [N-Term]	FALSE	0.000148726	1	1	5	P04075	P04075 [88-99]		0	1801.04	1.064	0.721	0.518	1.256	1.385	1.041	0.990999	0.930877	0.934037	0.919935	0.663684	0.99998	124.55	27.06	66.73	6.11	1.12	1.68	158.6	538.5	284.1	618.4	979.3	782.5	1082.5	1039.9	930.4	128.18	91.71		61.44	38.1	40.36	56.65	37.3	108.5		High
[K].ADDGRPFPQVIK.[S]	1xDeamidated [Q9]; 1xTMT6plex [K12]; 1xTMT6plex [N-Term]	FALSE	0.000148726	1	1	1	P04075	P04075 [88-99]		0	1802.02	0.841	0.57	0.516	0.976	1.335	1.043	0.999946	0.935243	0.947786	0.99995	0.733949	0.99998	0	0	0	0	0	0	208.2	247.7	76	141.2	468.1	640.3	500.5	479.7	511.1											High
[R].ALANSLACQGK.[Y]	1xMethylthio [C8]; 1xTMT6plex [K11]; 1xTMT6plex [N-Term]	FALSE	0.000148726	1	1	7	P04075	P04075 [332-342]	P04075 1xMethylthio [C339]	0	1579.87	1.012	0.813	0.395	1.069	1.154	0.934	0.99491	0.999966	0.773648	0.99995	0.994817	0.99998	37.78	159.22	22.49	5.82	27.04	25.74	223.1	220.6	122.3	179.4	596.5	644.3	521.6	558.2	478.5	55.16	82.17	96.36	37.11	71.01	45.23	46.33	66.78	67.53		High
[R].TVPPAVTGITFLSGGQSEEEASINLNAINK.[C]	1xTMT6plex [K30]; 1xTMT6plex [N-Term]	FALSE	0.000227648	1	1	1	P04075	P04075 [260-289]		0	3515.9	0.654	1.113	0.83	0.779	0.973	0.8	0.967959	0.961119	0.995354	0.700818	0.999112	0.928584	0	0	0	0	0	0	119.6	182.9	236.2	203.6	171.6	214.6	176.3	220.5	155.5											n/a
[K].AAQEEYVKR.[A]	1xTMT6plex [K8]; 1xTMT6plex [N-Term]	FALSE	0.000227648	1	1	2	P04075	P04075 [323-331]		1	1551.89	2.551	13.666	0.036	1.328	1.448	0.981	0.488802	0.00665703	8.93352e-07	0.852652	0.451737	0.99998	0	532.33	244.53	25.48	40.16	35.66	116.6	45.7	0	135.7	682.9	744.2	504.3	514.1	455.1				61.21	26.99	79.11	76.2	49.35	55.89		n/a
[R].QLLLTADDR.[V]	1xTMT6plex [N-Term]	FALSE	0.000283189	1	1	2	P04075	P04075 [61-69]		0	1273.73	0.792	0.724	0.658	0.957	0.561	0.787	0.99491	0.987237	0.984809	0.99995	0.186297	0.901707	12.58	11.22	6.02	12.19	19.6	52.3	282.5	356.5	12.5	258.2	518.2	303.6	426	541.6	781.1	27.08	15.36		25.82	21.14	8.94	38.24	9.67	104.69		High
[K].AAQEEYVK.[R]	1xTMT6plex [K8]; 1xTMT6plex [N-Term]	FALSE	0.000283189	1	1	6	P04075	P04075 [323-330]		0	1395.79	2.116	2.212	0.023	0.891	0.728	0.824	0.273162	0.236586	7.19486e-06	0.99995	0.895878	0.965655	147.56	128.1	144	23.36	19.52	25.91	394	140.3	0	310.3	1564.5	2029.7	1663.2	2371.8	2505.8	65.93	92.95		0.85	69.92	78.45	58.45	69.37	9.72		n/a
[K].SKGGVVGIK.[V]	2xTMT6plex [K2; K9]; 1xTMT6plex [N-Term]	FALSE	0.000283189	1	1	2	P04075	P04075 [100-108]		1	1532.01	11.955	0.01	0.05	0.948	1.11	0.983	0.0388272	1.02234e-16	0.00114564	0.99995	0.999112	0.99998	611.2	0	354.6	16.15	19.45	1.39	49.6	19.2	3.1	0	105.8	124	109.8	111.7	84.2	75.02				35.62	65.02	48.42	49.59	47.98		High
[R].ALQASALK.[A]	1xTMT6plex [K8]; 1xTMT6plex [N-Term]	FALSE	0.000283189	1	1	19	P04075	P04075 [305-312]		0	1259.81	2.44	0.747	0.552	1.079	1.3	1.017	0.287701	0.723605	0.925911	0.99995	0.724658	0.99998	18.21	255.7	60.64	8.71	11.04	8.8	3484.4	1428.1	1850.9	1067.2	2789.4	3361.5	2628.4	2585.4	2712.8	100.42	108.29	91.4	41.63	82.75	69.41	71.02	77.1	83.53		High
[K].ALSDHHIYLEGTLLKPNMVTPGHACTQK.[F]	2xDeamidated [N17; Q27]; 1xMethylthio [C25]; 2xTMT6plex [K15; K28]; 1xTMT6plex [N-Term]	FALSE	0.000283189	1	1	1	P04075	P04075 [216-243]	P04075 1xMethylthio [C240]	0	3810																																					No Quan Values	n/a
[K].KDGADFAK.[W]	2xTMT6plex [K1; K8]; 1xTMT6plex [N-Term]	FALSE	0.000531151	2	2	2	P04075; P09972	P04075 [140-147]; P09972 [140-147]		1	1538.91	1.803	1.206	0.348	0.955	1.226	0.89	0.449271	0.869658	0.64463	0.99995	0.858739	0.99998	25.67	94.76	56.39	19.72	13.5	6.19	559.3	310.1	258	374	850.4	1091.6	792.5	890.1	787.9	24.5	0.38	41.72	75.89	32.83	60.81	55.03	49.94	39.14	Shared	High
[K].ELSDIAHR.[I]	1xTMT6plex [N-Term]	FALSE	0.00067056	1	1	1	P04075	P04075 [15-22]		0	1169.65	100	100	0.01	0.927	1.12	0.981	3.23126e-16	1.02234e-16	6.41184e-16	0.99995	0.999112	0.99998	0	0	0	0	0	0	179.5	0	0	255	383	462.6	405.4	413.2	389.4											High
[R].CQYVTEK.[V]	1xMethylthio [C1]; 1xTMT6plex [K7]; 1xTMT6plex [N-Term]	FALSE	0.00149686	2	2	5	P04075; P09972	P04075 [202-208]; P09972 [202-208]	P04075 1xMethylthio [C202]; P09972 1xMethylthio [C202]	0	1374.72	17.546	11.654	0.072	0.608	0.722	0.772	1.65907e-11	7.16844e-06	0.00230135	0.278938	0.804166	0.829264	409.48	627.47	526.5	117.27	19.11	192.01	242.6	328.8	0	241.6	548.5	651.1	695.9	901.8	818.6	126.06			77.37	112.63	64.42	126.35	49.2	38.01	Shared	High
[K].VLAAVYK.[A]	1xTMT6plex [K7]; 1xTMT6plex [N-Term]	FALSE	0.00154599	2	3	2	P04075; P09972	P04075 [209-215]; P09972 [209-215]		0	1221.8	0.01	2.484	0.094	1.25	0.87	1.616	3.23126e-16	0.747195	0.000814062	0.960733	0.996444	0.0788449	0	0	0	0	0	0	0	30.8	0	76.5	407.6	283.6	526.9	326	281.3										Shared	n/a
[K].DGADFAK.[W]	1xTMT6plex [K7]; 1xTMT6plex [N-Term]	FALSE	0.00272087	2	2	7	P04075; P09972	P04075 [141-147]; P09972 [141-147]		0	1181.66	1.865	1.083	0.182	1.003	1.091	0.721	0.509429	0.987237	0.102121	0.99995	0.997321	0.657408	30.65	130.65	108.94	0.57	26.28	8.08	824.8	442.2	284.1	759	1768.1	1923.9	1204.6	1762.8	2490.4	24.37	64.07	55.04	88.23	53.32	67.28	67.72	40.54	42.59	Shared	High
[K].IGEHTPSALAIMENANVLAR.[Y]	1xDeamidated [N14]; 1xOxidation [M12]; 1xTMT6plex [N-Term]	FALSE	0.00348737	1	1	1	P04075	P04075 [154-173]		0	2353.24																																					No Quan Values	n/a
[R].ALANSLACQGK.[Y]	1xDeamidated [Q9]; 1xMethylthio [C8]; 1xTMT6plex [K11]; 1xTMT6plex [N-Term]	FALSE	0.00361172	1	1	1	P04075	P04075 [332-342]	P04075 1xMethylthio [C339]	0	1580.85	0.01	4.922	0.316	0.96	1.545	1.258	3.23126e-16	0.469373	0.785894	0.99995	0.548521	0.780999	0	0	0	0	0	0	0	14.4	69.8	70.8	43.7	70.3	57.3	45.5	43											n/a
[K].SKGGVVGIKVDK.[G]	3xTMT6plex [K2; K9; K12]; 1xTMT6plex [N-Term]	FALSE	0.00429452	1	1	2	P04075	P04075 [100-111]		2	2103.37	0.846	0.121	1.144	1.305	1.538	0.995	0.998987	0.0802642	0.999998	0.966991	0.463166	0.99998	77.89	891.48	17.73	39.16	101.53	56.22	82.8	97.9	30.8	124	111.6	131.6	85.2	85.6	66.7	48.52	20.53	6.6		39.65	77.28	46.78	3.8	1.53		High
[K].GGVVGIK.[V]	1xTMT6plex [K7]; 1xTMT6plex [N-Term]	FALSE	0.00429452	1	1	2	P04075	P04075 [102-108]		0	1087.72	2.026	9.046	0.087	0.81	0.734	1.08	0.561938	4.79484e-06	0.00619697	0.938901	0.900485	0.99998	0	812.73	640	39.36	66.47	25.34	1680.1	829.3	0	375.2	662.9	600.3	884	818.1	1306				75.22	2.64	21.53	15.63	38.74	114.91		n/a
O95969	Secretoglobin family 1D member 2 [OS=Homo sapiens]	0.002	3.224	12	1	1	1	90	9.9	8.25	2.33	1				Pf01099	10647	ENSG00000124935	SCGB1D2	hsa:10647; O95969; Q2M3N9			0	0	1.031	1.475	1.922	1.024	3.444	1.792	0.921663	0.667095	0.753413	0.952008	3.97134e-12	0.0118916	0	0	0	0	0	0	264.4	256.3	293.5	377.9	136.5	459.1	238.9
Annotated Sequence	Modifications	Contaminant	Qvality q-value	# Protein Groups	# Proteins	# PSMs	Master Protein Accessions	Positions in Master Proteins	Modifications in Master Proteins	# Missed Cleavages	Theo. MH+ [Da]	Abundance Ratio: (Hyperoxic 0-95) / (Hyperoxic 21)	Abundance Ratio: (Hyperoxic 95) / (Hyperoxic 21)	Abundance Ratio: (Hyperoxic 21) / (Hypoxic 21)	Abundance Ratio: (Hypoxic 0-21) / (Hypoxic 21)	Abundance Ratio: (Hypoxic 10) / (Hypoxic 21)	Abundance Ratio: (Hypoxic 2) / (Hypoxic 21)	Abundance Ratio Adj. P-Value: (Hyperoxic 0-95) / (Hyperoxic 21)	Abundance Ratio Adj. P-Value: (Hyperoxic 95) / (Hyperoxic 21)	Abundance Ratio Adj. P-Value: (Hyperoxic 21) / (Hypoxic 21)	Abundance Ratio Adj. P-Value: (Hypoxic 0-21) / (Hypoxic 21)	Abundance Ratio Adj. P-Value: (Hypoxic 10) / (Hypoxic 21)	Abundance Ratio Adj. P-Value: (Hypoxic 2) / (Hypoxic 21)	Abundance Ratio Variability [%]: (Hyperoxic 0-95) / (Hyperoxic 21)	Abundance Ratio Variability [%]: (Hyperoxic 95) / (Hyperoxic 21)	Abundance Ratio Variability [%]: (Hyperoxic 21) / (Hypoxic 21)	Abundance Ratio Variability [%]: (Hypoxic 0-21) / (Hypoxic 21)	Abundance Ratio Variability [%]: (Hypoxic 10) / (Hypoxic 21)	Abundance Ratio Variability [%]: (Hypoxic 2) / (Hypoxic 21)	Abundances (Grouped): Hyperoxic 0-95	Abundances (Grouped): Hyperoxic 21	Abundances (Grouped): Hyperoxic 40	Abundances (Grouped): Hyperoxic 95	Abundances (Grouped): Hypoxic 0-21	Abundances (Grouped): Hypoxic 10	Abundances (Grouped): Hypoxic 2	Abundances (Grouped): Hypoxic 21	Abundances (Grouped): SM	Abundances (Grouped) CV [%]: Hyperoxic 0-95	Abundances (Grouped) CV [%]: Hyperoxic 21	Abundances (Grouped) CV [%]: Hyperoxic 40	Abundances (Grouped) CV [%]: Hyperoxic 95	Abundances (Grouped) CV [%]: Hypoxic 0-21	Abundances (Grouped) CV [%]: Hypoxic 10	Abundances (Grouped) CV [%]: Hypoxic 2	Abundances (Grouped) CV [%]: Hypoxic 21	Abundances (Grouped) CV [%]: SM	Quan Info	Found in Sample: F5: 130N, Sample, Hyperoxic 0-95, D1
[K].FDAPPEAVAAK.[L]	1xTMT6plex [K11]; 1xTMT6plex [N-Term]	FALSE	0.000283189	1	1	1	O95969	O95969 [49-59]		0	1573.9	1.031	1.475	1.922	1.024	3.444	1.792	0.991025	0.686107	0.903281	0.99995	6.73665e-08	0.0278735	0	0	0	0	0	0	264.4	256.3	293.5	377.9	136.5	459.1	238.9	133.3	188.6											n/a
P04632	Calpain small subunit 1 [OS=Homo sapiens]	0	14.356	17	4	12	4	268	28.3	5.2	49.85	4	protein metabolism;other biological processes	plasma membrane;other membranes;cytosol;other cell component	other molecular function		826	ENSG00000126247	CAPNS1	A8K0P1; hsa:826; P04632; Q8WTX3; Q96EW0	Formation of the cornified envelope; Degradation of the extracellular matrix; Deregulated CDK5 triggers multiple neurodegenerative pathways in Alzheimer's disease models	Integrin-mediated cell adhesion	4	0	0.787	0.811	1.348	0.856	1.083	0.788	0.857489	0.831869	0.858849	0.466926	0.985994	0.174965	83.04	94.37	37.85	19.07	3.49	48.18	844.7	944.3	822.8	1173.4	960.4	1275.8	998.5
Annotated Sequence	Modifications	Contaminant	Qvality q-value	# Protein Groups	# Proteins	# PSMs	Master Protein Accessions	Positions in Master Proteins	Modifications in Master Proteins	# Missed Cleavages	Theo. MH+ [Da]	Abundance Ratio: (Hyperoxic 0-95) / (Hyperoxic 21)	Abundance Ratio: (Hyperoxic 95) / (Hyperoxic 21)	Abundance Ratio: (Hyperoxic 21) / (Hypoxic 21)	Abundance Ratio: (Hypoxic 0-21) / (Hypoxic 21)	Abundance Ratio: (Hypoxic 10) / (Hypoxic 21)	Abundance Ratio: (Hypoxic 2) / (Hypoxic 21)	Abundance Ratio Adj. P-Value: (Hyperoxic 0-95) / (Hyperoxic 21)	Abundance Ratio Adj. P-Value: (Hyperoxic 95) / (Hyperoxic 21)	Abundance Ratio Adj. P-Value: (Hyperoxic 21) / (Hypoxic 21)	Abundance Ratio Adj. P-Value: (Hypoxic 0-21) / (Hypoxic 21)	Abundance Ratio Adj. P-Value: (Hypoxic 10) / (Hypoxic 21)	Abundance Ratio Adj. P-Value: (Hypoxic 2) / (Hypoxic 21)	Abundance Ratio Variability [%]: (Hyperoxic 0-95) / (Hyperoxic 21)	Abundance Ratio Variability [%]: (Hyperoxic 95) / (Hyperoxic 21)	Abundance Ratio Variability [%]: (Hyperoxic 21) / (Hypoxic 21)	Abundance Ratio Variability [%]: (Hypoxic 0-21) / (Hypoxic 21)	Abundance Ratio Variability [%]: (Hypoxic 10) / (Hypoxic 21)	Abundance Ratio Variability [%]: (Hypoxic 2) / (Hypoxic 21)	Abundances (Grouped): Hyperoxic 0-95	Abundances (Grouped): Hyperoxic 21	Abundances (Grouped): Hyperoxic 40	Abundances (Grouped): Hyperoxic 95	Abundances (Grouped): Hypoxic 0-21	Abundances (Grouped): Hypoxic 10	Abundances (Grouped): Hypoxic 2	Abundances (Grouped): Hypoxic 21	Abundances (Grouped): SM	Abundances (Grouped) CV [%]: Hyperoxic 0-95	Abundances (Grouped) CV [%]: Hyperoxic 21	Abundances (Grouped) CV [%]: Hyperoxic 40	Abundances (Grouped) CV [%]: Hyperoxic 95	Abundances (Grouped) CV [%]: Hypoxic 0-21	Abundances (Grouped) CV [%]: Hypoxic 10	Abundances (Grouped) CV [%]: Hypoxic 2	Abundances (Grouped) CV [%]: Hypoxic 21	Abundances (Grouped) CV [%]: SM	Quan Info	Found in Sample: F5: 130N, Sample, Hyperoxic 0-95, D1
[R].THYSNIEANESEEVR.[Q]	1xTMT6plex [N-Term]	FALSE	0.000148726	1	1	6	P04632	P04632 [85-99]		0	2006.96	0.584	0.61	2.302	1.096	1.083	1.105	0.922131	0.969972	0.748621	0.99995	0.999112	0.99185	74.03	74.43	25.71	32.48	28.7	15.09	134.7	157.2	471.6	134.8	200.2	253.4	184.4	233.9	185.7	32.58	87.39	42.03	46.27	44.84	68.26	57.22	56.46	35.5		High
[R].SMVAVMDSDTTGK.[L]	1xTMT6plex [K13]; 1xTMT6plex [N-Term]	FALSE	0.000227648	1	1	2	P04632	P04632 [146-158]		0	1799.93	0.859	0.509	0.726	0.943	1.095	0.978	0.998494	0.803354	0.995354	0.99995	0.999112	0.99998	49.66	133.26	57.35	4.9	11.96	6.16	232.3	270.5	350.3	137.7	351	407.6	364.1	372.4	348.3	25.88	20.21	29.22	82.18	36.87	21.5	26.87	32.48	24.5		High
[K].TDGFGIDTCR.[S]	1xMethylthio [C9]; 1xTMT6plex [N-Term]	FALSE	0.000227648	1	1	2	P04632	P04632 [136-145]	P04632 1xMethylthio [C144]	0	1359.62	19.608	4.065	0.042	0.782	1.021	0.898	1.30692e-09	0.0640191	1.74219e-06	0.82099	0.999697	0.99998	363.53	0	293.95	33.45	26.22	47.87	210	68.7	0	279.4	432.5	564.4	496.6	553	317.8	31.96				17.96	24.57	4.79	47.75	18.21		High
[K].LGFEEFK.[Y]	1xTMT6plex [K7]; 1xTMT6plex [N-Term]	FALSE	0.00226342	1	2	2	P04632	P04632 [159-165]		0	1327.77	1.685	3.873	0.166	0.426	0.546	0.439	0.564525	0.00279235	0.0307776	0.00585381	0.252982	0.000509476	71.28	245.54	337.01	139.63	7.33	190.73	357.5	212.2	0	821.7	544.8	698.2	561.6	1279	1424.1	112.46	129.21		37.4	97.72	5.54	112.2	1.45	29.34		High
P63104	14-3-3 protein zeta/delta [OS=Homo sapiens]	0	121.431	56	20	98	15	245	27.7	4.79	343.23	20	cell organization and biogenesis;protein metabolism;other metabolic processes;transport;developmental processes;signal transduction;other biological processes	cytosol;nucleus;other cell component	other molecular function	Pf00244	7534	ENSG00000164924	YWHAZ	A8K1N0; B7Z465; hsa:7534; P29213; P29312; P63104; Q32P43; Q5XJ08; Q6GPI2; Q6IN74; Q6NUR9; Q6P3U9; Q86V33	Translocation of SLC2A4 (GLUT4) to the plasma membrane; Negative regulation of NOTCH4 signaling; Regulation of localization of FOXO transcription factors; Deactivation of the beta-catenin transactivating complex; Interleukin-3, Interleukin-5 and GM-CSF signaling; TP53 Regulates Metabolic Genes; NOTCH4 Activation and Transmission of Signal to the Nucleus; Chk1/Chk2(Cds1) mediated inactivation of C…	Cell cycle; Prolactin signaling pathway; Pathogenic Escherichia coli infection; Myometrial relaxation and contraction pathways; Hepatitis B infection; GDNF signaling; Calcium regulation in cardiac cells; Sudden infant death syndrome (SIDS) susceptibility pathways	23	7	0.819	1.191	0.363	1.332	0.991	1.085	0.857489	0.831955	0.101058	0.125115	0.993049	0.770547	17.48	35.23	23.72	26.78	5.54	59.31	6609.8	5020.7	2742.7	4765.2	15900.9	18440.2	13926.7
Annotated Sequence	Modifications	Contaminant	Qvality q-value	# Protein Groups	# Proteins	# PSMs	Master Protein Accessions	Positions in Master Proteins	Modifications in Master Proteins	# Missed Cleavages	Theo. MH+ [Da]	Abundance Ratio: (Hyperoxic 0-95) / (Hyperoxic 21)	Abundance Ratio: (Hyperoxic 95) / (Hyperoxic 21)	Abundance Ratio: (Hyperoxic 21) / (Hypoxic 21)	Abundance Ratio: (Hypoxic 0-21) / (Hypoxic 21)	Abundance Ratio: (Hypoxic 10) / (Hypoxic 21)	Abundance Ratio: (Hypoxic 2) / (Hypoxic 21)	Abundance Ratio Adj. P-Value: (Hyperoxic 0-95) / (Hyperoxic 21)	Abundance Ratio Adj. P-Value: (Hyperoxic 95) / (Hyperoxic 21)	Abundance Ratio Adj. P-Value: (Hyperoxic 21) / (Hypoxic 21)	Abundance Ratio Adj. P-Value: (Hypoxic 0-21) / (Hypoxic 21)	Abundance Ratio Adj. P-Value: (Hypoxic 10) / (Hypoxic 21)	Abundance Ratio Adj. P-Value: (Hypoxic 2) / (Hypoxic 21)	Abundance Ratio Variability [%]: (Hyperoxic 0-95) / (Hyperoxic 21)	Abundance Ratio Variability [%]: (Hyperoxic 95) / (Hyperoxic 21)	Abundance Ratio Variability [%]: (Hyperoxic 21) / (Hypoxic 21)	Abundance Ratio Variability [%]: (Hypoxic 0-21) / (Hypoxic 21)	Abundance Ratio Variability [%]: (Hypoxic 10) / (Hypoxic 21)	Abundance Ratio Variability [%]: (Hypoxic 2) / (Hypoxic 21)	Abundances (Grouped): Hyperoxic 0-95	Abundances (Grouped): Hyperoxic 21	Abundances (Grouped): Hyperoxic 40	Abundances (Grouped): Hyperoxic 95	Abundances (Grouped): Hypoxic 0-21	Abundances (Grouped): Hypoxic 10	Abundances (Grouped): Hypoxic 2	Abundances (Grouped): Hypoxic 21	Abundances (Grouped): SM	Abundances (Grouped) CV [%]: Hyperoxic 0-95	Abundances (Grouped) CV [%]: Hyperoxic 21	Abundances (Grouped) CV [%]: Hyperoxic 40	Abundances (Grouped) CV [%]: Hyperoxic 95	Abundances (Grouped) CV [%]: Hypoxic 0-21	Abundances (Grouped) CV [%]: Hypoxic 10	Abundances (Grouped) CV [%]: Hypoxic 2	Abundances (Grouped) CV [%]: Hypoxic 21	Abundances (Grouped) CV [%]: SM	Quan Info	Found in Sample: F5: 130N, Sample, Hyperoxic 0-95, D1
[K].KGIVDQSQQAYQEAFEISK.[K]	2xTMT6plex [K1; K19]; 1xTMT6plex [N-Term]	FALSE	0.000148726	1	1	4	P63104	P63104 [139-157]		1	2856.57	0.745	1.113	0.569	0.945	0.839	0.648	0.99491	0.970105	0.934037	0.99995	0.956759	0.292957	37.32	52.79	11.23	14.93	23.4	43.41	136.9	191.1	231.3	71.9	310	292.8	294.3	361	377.5	42.52	64.84	13.93	107.87	79.22	76.71	31.89	75.19	31.06		High
[K].GIVDQSQQAYQEAFEISKK.[E]	1xDeamidated [Q]; 2xTMT6plex [K18; K19]; 1xTMT6plex [N-Term]	FALSE	0.000148726	1	1	2	P63104	P63104 [140-158]		1	2857.56	0.871	1.51	0.182	1.279	1.895	1.393	1	0.712042	0.111117	0.883221	0.0476458	0.536333	0	0	0	0	0	0	177.7	204	44.8	308.2	1433.2	2123.1	1560	1120.2	1105.2											High
[K].GIVDQSQQAYQEAFEISKK.[E]	2xTMT6plex [K18; K19]; 1xTMT6plex [N-Term]	FALSE	0.000148726	1	1	6	P63104	P63104 [140-158]		1	2856.57	0.883	1.127	0.356	1.624	1.093	1.283	0.99919	0.929629	0.573014	0.296039	0.99654	0.753662	2.9	135.18	73.12	7.47	27.04	68.96	291.4	323.4	119.5	394.1	868.8	811.1	577.5	751.1	770.3	74.37	32.97	59.86	2.92	59.78	64.06	37.15	52.7	10.95		High
[K].GIVDQSQQAYQEAFEISK.[K]	1xTMT6plex [K18]; 1xTMT6plex [N-Term]	FALSE	0.000148726	1	1	3	P63104	P63104 [140-157]		0	2499.31	0.52	0.767	0.647	1.12	1.076	0.729	0.886246	0.999966	0.967673	0.99995	0.999112	0.623939	81.05	124.53	112.53	35.48	9.77	5.45	110.8	102.1	73.2	89	177.4	177.6	146.5	208.3	202.1	7.67	83.62	98.65	17.9	72.48	78.78	53.23	74.34	45.49		n/a
[R].YLAEVAAGDDKK.[G]	2xTMT6plex [K11; K12]; 1xTMT6plex [N-Term]	FALSE	0.000148726	1	1	5	P63104	P63104 [128-139]		1	1967.14	0.667	0.599	0.371	1.222	0.913	1.02	0.875576	0.852847	0.72171	0.957319	0.999112	0.99998	20.93	27.47	27.18	18.87	54.11	12.02	447.4	378.1	218.1	332	1046.6	931.2	862.3	856.7	868.2	73.28	75.85	8.57	95.26	28.24	32.46	21.8	13.73	82.88		n/a
[R].YLAEVAAGDDKKGIVDQSQQAYQEAFEISK.[K]	3xTMT6plex [K11; K12; K30]; 1xTMT6plex [N-Term]	FALSE	0.000148726	1	1	2	P63104	P63104 [128-157]		2	4218.27	0.076	0.231	0.618	2.129	1.644	0.962	0.0191562	0.189102	0.984809	0.0807047	0.335358	0.99998	551.68	1708.43	96.29	95.91	126.34	101.27	24	54.2	98	223	186.7	144.2	84.3	87.7	83.4		35.93	95.38		105.24	56.35	39.6	47.7	8.8		n/a
[R].VVSSIEQKTEGAEKK.[Q]	3xTMT6plex [K8; K14; K15]; 1xTMT6plex [N-Term]	FALSE	0.000148726	1	1	2	P63104	P63104 [61-75]		2	2549.53	0.723	0.909	0.638	2.419	0.535	0.505	0.956088	0.999966	0.989839	0.00412757	0.0695107	0.0129539	0	0	0	0	0	0	342.4	473.6	140.6	430.4	1796.2	396.9	375.2	742.4	407.7											n/a
[K].SVTEQGAELSNEER.[N]	1xDeamidated [Q5]; 1xTMT6plex [N-Term]	FALSE	0.000148726	1	1	3	P63104	P63104 [28-41]		0	1778.86	0.01	0.01	0.082	1.375	1.265	0.822	3.23126e-16	1.02234e-16	0.0449729	0.852652	0.969004	0.970825	0	0	599.61	42.56	3.93	29.15	0	21.3	0	0	41.1	37.8	24.6	29.9	32.2					31.62	11.62	34.8	7.89	9.16		n/a
[K].SVTEQGAELSNEER.[N]	1xTMT6plex [N-Term]	FALSE	0.000148726	1	1	5	P63104	P63104 [28-41]		0	1777.88	2.05	0.073	1.57	1.405	1.401	1.058	0.531683	0.071824	0.978996	0.826915	0.792766	0.99998	35.72	530.69	49.91	24.6	1.22	21.27	145.5	71	201.1	64.9	63.5	63.3	47.8	45.2	65.2	92.33	69.89			6.48	28.29	48.07	29.41	9.01		High
[R].DNLTLWTSDTQGDEAEAGEGGEN.[-]	1xTMT6plex [N-Term]	FALSE	0.000148726	1	1	5	P63104	P63104 [223-245]		0	2638.16																																					No Quan Values	n/a
[R].VVSSIEQKTEGAEK.[K]	2xTMT6plex [K8; K14]; 1xTMT6plex [N-Term]	FALSE	0.000227648	1	1	1	P63104	P63104 [61-74]		1	2192.27																																					No Quan Values	n/a
[R].YDDMAACMK.[S]	1xMethylthio [C7]; 1xTMT6plex [K9]; 1xTMT6plex [N-Term]	FALSE	0.000227648	1	1	5	P63104	P63104 [19-27]	P63104 1xMethylthio [C25]	0	1551.71	1.057	1.461	0.105	1.078	0.951	0.942	0.979403	0.653043	0.0282463	0.99995	0.999975	0.99998	146.86	73.24	137.9	2.2	0.21	77.12	327.2	245.5	0	358.7	2407.8	2121.2	1533.8	2234.5	1904.3	25.9	6.62		57.2	69.33	71.63	67.41	77.83	33.06		n/a
[K].FLIPNASQAESK.[V]	1xTMT6plex [K12]; 1xTMT6plex [N-Term]	FALSE	0.000283189	1	1	7	P63104	P63104 [104-115]		0	1763.01	1.765	1.44	0.605	0.745	0.945	0.785	0.586564	0.768155	0.984809	0.665967	0.999697	0.833448	21.77	38.82	64.87	57.32	25.63	62.9	468.4	221.8	342.2	319.3	372.6	472.7	392.6	500.1	323	86.19	100.34	72.12	68.81	16.48	12.31	46.08	40.88	11.13		High
[R].YLAEVAAGDDK.[K]	1xTMT6plex [K11]; 1xTMT6plex [N-Term]	FALSE	0.000283189	1	1	3	P63104	P63104 [128-138]		0	1609.88	0.557	0.2	0.145	1.27	1.172	0.876	0.943099	0.0232046	0.0525325	0.897814	0.965976	0.99998	215.44	1475.53	39.67	13.64	47.15	44.08	69.9	125.6	59.2	485.4	1098.7	1014	758	865	931.3	117.83	4.23			20.04	70.51	68.39	32.57	46.71		High
[K].KEMQPTHPIR.[L]	1xTMT6plex [K1]; 1xTMT6plex [N-Term]	FALSE	0.000283189	3	3	2	P63104; P31946; P27348	P63104 [158-167]; P31946 [160-169]; P27348 [158-167]		1	1694.98	0.439	0.082	1.022	1.074	0.913	0.942	0.836633	0.0874949	0.99766	0.99995	0.999112	0.99998	7.67	595.3	84.82	16.42	18.49	29.26	41.7	95.1	68.8	38.1	99.9	85	87.7	93.1	76.5	60.26	66.11	19.13		20.84	12.2	22.18	5.36	17.23	Shared	High
[R].NLLSVAYK.[N]	1xTMT6plex [K8]; 1xTMT6plex [N-Term]	FALSE	0.000283189	6	7	6	P63104; P31946; Q04917; P61981; P27348; P62258	P63104 [42-49]; P31946 [44-51]; Q04917 [43-50]; P61981 [43-50]; P27348 [42-49]; P62258 [43-50]		0	1365.85	4.37	0.239	0.058	1.185	1.178	0.766	0.0179988	0.710305	5.81811e-05	0.98845	0.945445	0.806564	156.29	1770.92	166.49	34.08	10.92	35.3	221.3	50.6	76.6	60.3	1031.1	1025.1	666.9	870.3	671.1	80.9	129.68	0.92		96.38	68.69	49.84	76.36	72.36	Shared	High
[R].VVSSIEQK.[T]	1xTMT6plex [K8]; 1xTMT6plex [N-Term]	FALSE	0.000283189	1	1	7	P63104	P63104 [61-68]		0	1347.82	0.835	0.85	0.248	1.085	1.001	1.052	0.996046	0.994912	0.311152	0.99995	0.999112	0.99998	56.05	85.56	38.78	11.05	22.92	23.42	638	510.8	167.2	558.3	1417	1646.7	1483.9	1411.1	1930.8	10.28	43.32		39.56	62.85	54.23	32.77	50.48	8.88		n/a
[K].EMQPTHPIR.[L]	1xOxidation [M2]; 1xTMT6plex [N-Term]	FALSE	0.000357242	3	3	3	P63104; P31946; P27348	P63104 [159-167]; P31946 [161-169]; P27348 [159-167]		0	1353.71	0.73	0.749	1.386	1.572	1.278	1.368	0.969399	0.961393	0.9948	0.459081	0.816442	0.551848	125.34	54.99	39	23.03	37.42	58.9	454.4	648.2	150	466.5	706.2	750.7	614.3	449.1	580.4	125.48	48.44	122.31	77.83	54.32	30.92	71.72	23.74	62.33	Shared	High
[R].EKIETELR.[D]	1xTMT6plex [K2]; 1xTMT6plex [N-Term]	FALSE	0.000531151	1	1	2	P63104	P63104 [84-91]		1	1475.88	0.202	0.072	0.146	0.542	0.62	0.853	0.00194866	0.00152523	0.0297317	0.0972329	0.493062	0.99998	1494.39	522.03	124.75	121.95	70.75	47.91	442.7	176.5	102.2	148.1	656.6	751.1	1033.8	1212	868.4		63.92	108.98		62.28	88.82	5.7	38.26	19.98		n/a
[K].EMQPTHPIR.[L]	1xTMT6plex [N-Term]	FALSE	0.00091513	3	3	2	P63104; P31946; P27348	P63104 [159-167]; P31946 [161-169]; P27348 [159-167]		0	1337.72	0.544	7.475	0.476	1.164	1.086	0.962	0.948294	0.00336365	0.904009	0.99995	0.999112	0.99998	338.57	80.28	61.94	14.59	4.89	0.11	25.2	46.3	31.6	346.4	113.4	105.8	93.7	97.4	105.4	104.41	77.65		13.97	15.83	24.86	29.45	29.35	16.2	Shared	High
[R].YDDMAACMK.[S]	1xOxidation [M]; 1xMethylthio [C7]; 1xTMT6plex [K9]; 1xTMT6plex [N-Term]	FALSE	0.000964462	1	1	5	P63104	P63104 [19-27]	P63104 1xMethylthio [C25]	0	1567.7	0.786	1.732	0.143	1.107	0.901	1.085	0.998494	0.41955	0.0662067	0.99995	0.999112	0.99998	87.11	85.04	134.1	8.68	2.83	66.82	216.6	262.8	0	455.3	1832.8	1899	1321.4	1758.1	1800.7	54.83	6.61		65.27	73.06	76.26	65.61	76.89	18.97		High
[R].YDDMAACMK.[S]	2xOxidation [M4; M8]; 1xMethylthio [C7]; 1xTMT6plex [K9]; 1xTMT6plex [N-Term]	FALSE	0.000964462	1	1	2	P63104	P63104 [19-27]	P63104 1xMethylthio [C25]	0	1583.7																																					No Quan Values	High
[K].AKLAEQAER.[Y]	1xTMT6plex [K2]; 1xTMT6plex [N-Term]	FALSE	0.00149686	3	4	1	P63104; P31946; P27348	P63104 [10-18]; P31946 [12-20]; P27348 [10-18]		1	1473.88	100		0.01	1.781	1.083	0.575	3.23126e-16		6.41184e-16	0.140634	0.998921	0.100481	0		0	0	0	0	268.4	0	0	0	1706.7	1037.1	550.6	958	955.8										Shared	n/a
[KR].LAEQAER.[Y]	1xDeamidated [Q4]; 1xTMT6plex [N-Term]	FALSE	0.00172058	6	7	3	P63104; P31946; Q04917; P61981; P27348; P62258	P63104 [12-18]; P31946 [14-20]; Q04917 [13-19]; P61981 [13-19]; P27348 [12-18]; P62258 [13-19]		0	1046.57	0.929	1.149	0.551	1.147	1.084	0.813	0.998494	0.943152	0.905046	0.99995	0.999112	0.946611	15.55	126.6	92.34	28.87	24.06	21.29	75.3	143.1	16	167.9	197.5	194	173.8	213.7	232.6	48.07	36.74		11.58	34.1	33.41	9.93	49.95	43.09	Shared	High
[R].DNLTLWTSDTQGDEAEAGEGGEN.[-]	1xOxidation [W6]; 1xTMT6plex [N-Term]	FALSE	0.00178803	1	1	1	P63104	P63104 [223-245]		0	2654.15																																					No Quan Values	n/a
[KR].LAEQAER.[Y]	1xTMT6plex [N-Term]	FALSE	0.00315727	6	7	8	P63104; P31946; Q04917; P61981; P27348; P62258	P63104 [12-18]; P31946 [14-20]; Q04917 [13-19]; P61981 [13-19]; P27348 [12-18]; P62258 [13-19]		0	1045.58	0.721	1.604	0.645	1.005	1.109	0.888	0.91243	0.659229	0.991623	0.99995	0.995205	0.99998	30.54	52.52	32.48	17.41	36.19	24.5	807.8	599.6	719.7	560.8	1082.1	1503.5	1032.5	1076.5	1412.7	97.94	56.98	77.39	92.5	32.78	34.42	98.57	19.32	11.78	Shared	High
[K].TEGAEKK.[Q]	2xTMT6plex [K6; K7]; 1xTMT6plex [N-Term]	FALSE	0.00602617	1	1	3	P63104	P63104 [69-75]		1	1449.89	0.454	0.126	0.265	1.173	1.251	0.879	0.488802	8.91596e-05	0.324806	0.996324	0.816524	0.99998	4.22	927.72	19.31	19.17	49.84	79.2	203.6	448.9	175.6	463.4	1990.3	2122.1	1490.5	1696	683.2	60.61	57.28	100.2		57.16	4.29	29.52	41.16	6.47		High
Q16363	Laminin subunit alpha-4 [OS=Homo sapiens]	0	537.097	44	93	472	93	1823	202.4	6.28	1707.31	93	cell adhesion;other biological processes	non-structural extracellular;extracellular matrix	signal transduction activity or receptor binding;extracellular structural activity	Pf00053, Pf02210, Pf06008, Pf06009	3910	ENSG00000112769	LAMA4	hsa:3910; Q14731; Q14735; Q15335; Q16363; Q4LE44; Q5SZG8; Q9BTB8; Q9UE18; Q9UJN9	ECM proteoglycans; Non-integrin membrane-ECM interactions; Laminin interactions; MET activates PTK2 signaling	miRNA targets in ECM and membrane receptors; Focal adhesion; Focal adhesion: PI3K-Akt-mTOR-signaling pathway; PI3K-Akt signaling pathway; Small cell lung cancer; Malignant pleural mesothelioma	10	0	0.986	1.133	0.986	1.001	0.899	1.207	0.97556	0.915075	0.998576	0.962927	0.963396	0.222729	8.33	21.01	4.29	11.87	16.12	4.89	77629	70374.4	84083.8	82454.4	49493.2	50611.9	62368.1
Annotated Sequence	Modifications	Contaminant	Qvality q-value	# Protein Groups	# Proteins	# PSMs	Master Protein Accessions	Positions in Master Proteins	Modifications in Master Proteins	# Missed Cleavages	Theo. MH+ [Da]	Abundance Ratio: (Hyperoxic 0-95) / (Hyperoxic 21)	Abundance Ratio: (Hyperoxic 95) / (Hyperoxic 21)	Abundance Ratio: (Hyperoxic 21) / (Hypoxic 21)	Abundance Ratio: (Hypoxic 0-21) / (Hypoxic 21)	Abundance Ratio: (Hypoxic 10) / (Hypoxic 21)	Abundance Ratio: (Hypoxic 2) / (Hypoxic 21)	Abundance Ratio Adj. P-Value: (Hyperoxic 0-95) / (Hyperoxic 21)	Abundance Ratio Adj. P-Value: (Hyperoxic 95) / (Hyperoxic 21)	Abundance Ratio Adj. P-Value: (Hyperoxic 21) / (Hypoxic 21)	Abundance Ratio Adj. P-Value: (Hypoxic 0-21) / (Hypoxic 21)	Abundance Ratio Adj. P-Value: (Hypoxic 10) / (Hypoxic 21)	Abundance Ratio Adj. P-Value: (Hypoxic 2) / (Hypoxic 21)	Abundance Ratio Variability [%]: (Hyperoxic 0-95) / (Hyperoxic 21)	Abundance Ratio Variability [%]: (Hyperoxic 95) / (Hyperoxic 21)	Abundance Ratio Variability [%]: (Hyperoxic 21) / (Hypoxic 21)	Abundance Ratio Variability [%]: (Hypoxic 0-21) / (Hypoxic 21)	Abundance Ratio Variability [%]: (Hypoxic 10) / (Hypoxic 21)	Abundance Ratio Variability [%]: (Hypoxic 2) / (Hypoxic 21)	Abundances (Grouped): Hyperoxic 0-95	Abundances (Grouped): Hyperoxic 21	Abundances (Grouped): Hyperoxic 40	Abundances (Grouped): Hyperoxic 95	Abundances (Grouped): Hypoxic 0-21	Abundances (Grouped): Hypoxic 10	Abundances (Grouped): Hypoxic 2	Abundances (Grouped): Hypoxic 21	Abundances (Grouped): SM	Abundances (Grouped) CV [%]: Hyperoxic 0-95	Abundances (Grouped) CV [%]: Hyperoxic 21	Abundances (Grouped) CV [%]: Hyperoxic 40	Abundances (Grouped) CV [%]: Hyperoxic 95	Abundances (Grouped) CV [%]: Hypoxic 0-21	Abundances (Grouped) CV [%]: Hypoxic 10	Abundances (Grouped) CV [%]: Hypoxic 2	Abundances (Grouped) CV [%]: Hypoxic 21	Abundances (Grouped) CV [%]: SM	Quan Info	Found in Sample: F5: 130N, Sample, Hyperoxic 0-95, D1
[K].MLYYGEEHELSPK.[E]	1xTMT6plex [K13]; 1xTMT6plex [N-Term]	FALSE	0.000148726	1	1	5	Q16363	Q16363 [402-414]		0	2054.07	1.041	1.535	1.195	0.905	0.908	1.15	0.998494	0.704219	0.995354	0.99995	0.999112	0.975614	38.82	60.69	61.71	3.39	2.43	2.43	871.5	785.4	841.6	1238.9	644	506.5	597.1	494.9	981.9	55.07	17.78	81.23	43.21	47.33	54.11	54.94	57.54	28.75		High
[K].ESMDTINHASQLVEQAHDMRDK.[I]	1xTMT6plex [K22]; 1xTMT6plex [N-Term]	FALSE	0.000148726	1	1	1	Q16363	Q16363 [373-394]		1	3013.49	2.792	2.804	0.798	1.383	1.176	0.711	0.0988539	0.112921	0.995354	0.887317	0.995205	0.616381	0	0	0	0	0	0	303.5	108.7	285.9	304.7	188.5	160.3	96.8	136.3	161.1											High
[K].ESMDTINHASQLVEQAHDMR.[D]	2xOxidation [M3; M19]; 1xTMT6plex [N-Term]	FALSE	0.000148726	1	1	11	Q16363	Q16363 [373-392]		0	2573.19	0.683	0.882	2.133	1.094	1.159	1.339	0.90346	0.995755	0.796164	0.99995	0.995924	0.506996	27.22	79.05	16.12	27.93	27.81	33.06	441.8	646.2	447.9	570.7	415	357	365.9	303.3	354	12.94	30.69	31.94	56.55	32.66	15.35	20.24	17.15	28.69		High
[K].ESMDTINHASQLVEQAHDMR.[D]	1xOxidation [M]; 1xTMT6plex [N-Term]	FALSE	0.000148726	1	1	5	Q16363	Q16363 [373-392]		0	2557.2	1.237	0.692	1.159	1.24	1.048	1.175	0.926058	0.987237	0.995354	0.99949	0.999112	0.945307	15.96	88.62	77.07	3.43	32.58	13.97	274.4	221.8	436.9	153.6	237.2	200.4	224.8	191.3	221.6	61.41	73.14	36.14	115.15	13.64	40.11	23.49	10.39	26.29		High
[R].EPVFVGGVPESLLTPR.[L]	1xTMT6plex [N-Term]	FALSE	0.000148726	1	1	3	Q16363	Q16363 [1767-1782]		0	1926.09	0.471	0.01	2.288	2.693	0.9	2.182	0.851242	1.02234e-16	0.832082	0.00261156	0.999112	0.00230638	87.18	0	129.3	66.02	87.73	125.1	47.9	93.3	597.2	0	446.5	169.7	102.4	133.7	502.3	49.26	127.81	13.38		60.97	124.37	127.5	83.09	43.59		High
[K].ESMDTINHASQLVEQAHDMR.[D]	1xTMT6plex [N-Term]	FALSE	0.000148726	1	1	7	Q16363	Q16363 [373-392]		0	2541.2	1.098	0.14	0.973	1.042	1.055	1.034	0.979403	9.6403e-05	0.99766	0.99995	0.999112	0.99998	79.06	1029.56	83.68	6.91	4.15	8.05	377.6	344	387.8	719.4	368.6	372.9	365.6	353.6	385	74.05	9.96	85.29		81.34	79.56	82.06	76.81	56.1		High
[K].NDNLVYVYNLGTK.[D]	1xTMT6plex [K13]; 1xTMT6plex [N-Term]	FALSE	0.000148726	1	1	6	Q16363	Q16363 [901-913]		0	1971.1	1.71	1.624	0.284	0.654	0.613	0.899	0.679355	0.418857	0.367986	0.449874	0.339956	0.99998	33.21	37.11	84.51	5.45	90.6	51.66	1231.3	419.7	613.7	255.2	436.9	903.9	887.9	643.2	660.9	80.11	90.14	14.89	97.63	90.78	74.46	87.99	70.19	57.42		High
[R].LTLSELDDIIK.[N]	1xTMT6plex [K11]; 1xTMT6plex [N-Term]	FALSE	0.000148726	1	1	1	Q16363	Q16363 [546-556]		0	1718.04	1.776	0.885	0.762	0.912	0.592	0.764	0.54544	0.998821	0.9948	0.99605	0.198273	0.778965	0	0	0	0	0	0	295.9	166.6	254	147.4	199.3	129.5	166.9	218.6	167.3											High
[R].IYDAVSGIDTQIIYHK.[D]	1xTMT6plex [K16]; 1xTMT6plex [N-Term]	FALSE	0.000148726	1	1	6	Q16363	Q16363 [651-666]		0	2294.28	0.566	0.589	1.19	0.814	0.895	1.243	0.555916	0.539747	0.99766	0.941043	0.999112	0.783818	65.51	39.41	0.64	10.3	18.83	36.36	622.8	1125.3	595.6	521	719.6	846.5	1176.2	946	1088.3	31.35	65.23	25.5	81.71	43.67	56.29	49.15	67.22	17.26		High
[R].IYDAVSGIDTQIIYHKDESENLLNQAR.[E]	1xTMT6plex [K16]; 1xTMT6plex [N-Term]	FALSE	0.000148726	1	1	9	Q16363	Q16363 [651-677]		1	3563.87	1.386	2.169	0.537	0.789	0.903	0.853	0.899651	0.249156	0.946577	0.889031	0.999112	0.995303	10.46	37.51	1.48	20.74	17.7	9.76	828	558	716.8	953.4	842.8	624.4	895.9	1050.1	1113.5	63.67	78.49	68.56	61.3	51.54	44.98	54.84	35.8	27.3		High
[R].IYDAVSGIDTQIIYHKDESENLLNQAR.[E]	1xDeamidated [Q11]; 1xTMT6plex [K16]; 1xTMT6plex [N-Term]	FALSE	0.000148726	1	1	5	Q16363	Q16363 [651-677]		1	3564.86	1.179	1.418	0.823	0.75	0.705	0.776	0.95232	0.799878	0.995354	0.639924	0.551311	0.872535	48.82	147.21	74.12	24.28	54.36	64.25	186.1	157.9	93.7	223.5	129.1	106.7	131.4	180	132.8	26.02	57.87	122.45	18.15	37.5	33.81	11.5	37.92	67.69		High
[K].QYNDGLSHFVISSVSPTR.[Y]	1xTMT6plex [N-Term]	FALSE	0.000148726	1	1	4	Q16363	Q16363 [1306-1323]		0	2236.16	1.129	0.715	0.456	1.311	0.561	0.799	0.973412	0.987237	0.897655	0.888161	0.0949634	0.91693	6.36	42.71	12.68	44.78	33.69	52.54	286.6	228.6	142.3	203	409.5	293.2	296.9	522.6	344.7	11.43	9.33	116.85	35.59	57.93	31.55	25.44	40.35	36.74		High
[K].QYNDGLSHFVISSVSPTRYELIVDK.[S]	1xTMT6plex [K25]; 1xTMT6plex [N-Term]	FALSE	0.000148726	1	1	4	Q16363	Q16363 [1306-1330]		1	3325.78	1.064	1.289	1.427	1.086	1.292	1.159	0.982944	0.836603	0.9948	0.99995	0.787958	0.957522	13.38	6.85	30.85	28.54	0.08	28.86	422.1	333.8	1017.3	522.5	529.1	250.2	555.1	193.6	372.1	51.55	52.79	28.31	62.64	44.65	76.16	43.19	75.83	22.99		High
[R].QEFEHLKGDFGAK.[S]	2xTMT6plex [K7; K13]; 1xTMT6plex [N-Term]	FALSE	0.000148726	1	1	3	Q16363	Q16363 [1480-1492]		1	2193.23	0.517	0.768	3.126	2.636	0.942	1.394	0.72814	0.987606	0.442364	0.00306317	0.999112	0.439906	32.58	30.22	59.85	0.83	82.62	14.2	270.3	403.8	546.8	319.5	280.7	131	248.1	162.4	124.2	38.39	44.23	53.66	22.3	55.77	89.59	39.67	34.26	26.55		High
[R].HFVIDGHPVSFSK.[A]	1xTMT6plex [K13]; 1xTMT6plex [N-Term]	FALSE	0.000148726	1	1	6	Q16363	Q16363 [1795-1807]		0	1928.08	1.043	1.041	1.654	1.051	1.081	1.211	0.996046	0.961119	0.911096	0.99995	0.999112	0.849133	77.81	135.44	52.15	25.78	7.32	54.56	477.5	457.7	899	243.8	253.6	221.3	339	204.7	278.5	123.59	68.2	58.91	148.16	98.86	92.08	62.96	112.94	90.67		High
[R].KIQINNAENTMK.[S]	2xTMT6plex [K1; K12]; 1xTMT6plex [N-Term]	FALSE	0.000148726	1	1	7	Q16363	Q16363 [336-347]		1	2091.22	0.959	1.951	2.252	1.236	0.864	1.35	0.998494	0.337914	0.799939	0.961733	0.999112	0.526116	12.7	34.11	39.3	16.04	0.46	31.14	652.7	680.4	1747.6	1327.4	742.1	519.1	811	600.6	951.9	78.36	66.23	106.18	97.78	89.77	68.73	83.89	73.13	89.5		High
[R].KIQINNAENTMK.[S]	1xOxidation [M11]; 2xTMT6plex [K1; K12]; 1xTMT6plex [N-Term]	FALSE	0.000148726	1	1	8	Q16363	Q16363 [336-347]		1	2107.21	0.783	0.858	2.547	1.054	0.79	1.149	0.939153	0.852433	0.882296	0.99995	0.918128	0.950607	31.32	2.54	7.77	3.74	23.45	26.13	1142.5	1849.7	1735.9	1587	727.1	605.2	792.9	690.1	664.4	80.78	71.66	80.98	98.58	47.85	64.92	55.6	41.66	67.13		High
[K].KEYMGLAIK.[N]	2xTMT6plex [K1; K9]; 1xTMT6plex [N-Term]	FALSE	0.000148726	1	1	1	Q16363	Q16363 [892-900]		1	1740.07	1.79	2.46	0.22	0.46	0.426	0.621	0.590168	0.261545	0.157528	0.00854114	0.00221799	0.218163	0	0	0	0	0	0	189.8	106	236	260.7	221.6	205.6	299.2	482.1	263.4											High
[K].KDFNLLEQTETLGVGYGCPEDSLISRR.[A]	1xMethylthio [C18]; 1xTMT6plex [K1]; 1xTMT6plex [N-Term]	FALSE	0.000148726	1	1	1	Q16363	Q16363 [1210-1236]	Q16363 1xMethylthio [C1227]	2	3544.82	0.355	1.453	2.089	7.51	1.35	6.709	0.739493	0.89493	0.898818	1.32577e-12	0.805333	1.24949e-15	0	0	0	0	0	0	26.2	73.9	178.5	107.4	265.8	47.8	237.4	35.4	191.4											n/a
[K].KDFNLLEQTETLGVGYGCPEDSLISR.[R]	1xMethylthio [C18]; 1xTMT6plex [K1]; 1xTMT6plex [N-Term]	FALSE	0.000148726	1	1	4	Q16363	Q16363 [1210-1235]	Q16363 1xMethylthio [C1227]	1	3388.72	0.607	0.701	2.515	1.068	1.021	1.358	0.890716	0.972782	0.526335	0.99995	0.999975	0.571238	23.12	35.61	2.65	3.54	31.06	54.27	202.1	333	661.1	199.6	359.3	265.2	282.7	328.5	363.4	66.68	83.45	95.31	22.04	64.58	40.12	56.38	63.42	38.54		High
[K].HIYNMDPSTSVPCAR.[D]	1xOxidation [M5]; 1xMethylthio [C13]; 1xTMT6plex [N-Term]	FALSE	0.000148726	1	1	6	Q16363	Q16363 [1023-1037]	Q16363 1xMethylthio [C1035]	0	1981.91	1.384	1.139	0.548	0.655	0.813	0.867	0.859725	0.926218	0.924066	0.315599	0.93985	0.99998	45.85	51.1	46.56	18.9	48.22	10.48	399.8	297.9	220.8	312.3	304.5	426	424.1	523.9	812.9	21.66	54.16	86.85	13.11	38.62	49.89	36.93	20.31	54.01		High
[K].HIYNMDPSTSVPCAR.[D]	1xMethylthio [C13]; 1xTMT6plex [N-Term]	FALSE	0.000148726	1	1	6	Q16363	Q16363 [1023-1037]	Q16363 1xMethylthio [C1035]	0	1965.92	0.873	1.07	1.002	1.031	0.816	1.09	0.998554	0.959876	0.99766	0.99995	0.949234	0.99998	31.9	1.38	48.58	2.16	6.39	20.35	323.4	295.6	412.9	292	368.4	358.1	412.4	362.4	374.6	21.58	59.4	28.95	11.3	19.29	35.42	26.2	27.27	22.24		High
[K].IQINNAENTMK.[S]	1xTMT6plex [K11]; 1xTMT6plex [N-Term]	FALSE	0.000148726	1	1	2	Q16363	Q16363 [337-347]		0	1733.96	0.746	1.187	1.592	0.94	0.777	1.028	0.955887	0.96862	0.974317	0.99995	0.873287	0.99998	92.79	93.65	27.03	26.86	26.28	25.51	454.8	609.6	623.7	723.4	359.8	297.4	393.6	382.9	413.5	21.76	89.48	60.15	21.08	51.84	52.31	52.93	72.32	36.53		High
[K].IQINNAENTMK.[S]	1xDeamidated [Q2]; 1xTMT6plex [K11]; 1xTMT6plex [N-Term]	FALSE	0.000148726	1	1	1	Q16363	Q16363 [337-347]		0	1734.95	0.533	0.458	2.215	0.815	0.695	0.834	0.553294	0.237988	0.831506	0.887317	0.632914	0.954648	0	0	0	0	0	0	576.9	1081.6	593.5	495.2	398.1	339.2	407.2	488.4	386.8											High
[K].IQVSMMFDGQSAVEVHSR.[T]	1xTMT6plex [N-Term]	FALSE	0.000148726	1	1	2	Q16363	Q16363 [832-849]		0	2250.12	0.01	0.01	0.775	0.86	0.838	0.666	3.23126e-16	1.02234e-16	0.99766	0.945834	0.939944	0.441131	0	0	0	0	0	0	0	38.1	108.4	0	42.3	41.2	32.8	49.2	26.8											n/a
[K].IQVSMMFDGQSAVEVHSR.[T]	1xOxidation [M5]; 1xTMT6plex [N-Term]	FALSE	0.000148726	1	1	5	Q16363	Q16363 [832-849]		0	2266.12	0.706	1.045	1.111	0.962	0.785	0.914	0.976453	0.973804	0.99766	0.99995	0.860804	0.99998	6.91	18.24	16.84	5.7	17.7	40	170.3	220	203	219.3	224.6	225.4	203.8	233.5	341.4	6.15	26.09	33.25	29.58	36.67	42.89	44.6	48.28	21.53		High
[K].GKIEQTQASEKK.[F]	3xTMT6plex [K2; K11; K12]; 1xTMT6plex [N-Term]	FALSE	0.000148726	1	1	6	Q16363	Q16363 [1341-1352]		2	2263.38	1.28	1.113	1.112	1.104	0.806	1.171	0.956088	0.987904	0.99766	0.99995	0.921884	0.965655	39.78	8.08	45.85	12.28	3.12	21.12	866.4	619	801.7	689.1	467.6	439.5	622.1	464.8	433.3	70.08	52.13	39.15	32.94	23.16	33.57	38.53	16.41	22.97		High
[K].GKIEQTQASEK.[K]	1xDeamidated [Q5]; 2xTMT6plex [K2; K11]; 1xTMT6plex [N-Term]	FALSE	0.000148726	1	1	1	Q16363	Q16363 [1341-1351]		1	1907.11	1.051	1.256	1.302	0.958	0.858	0.966	1	0.935607	0.995354	0.99995	0.999112	0.99998	0	0	0	0	0	0	1003.2	955	620.7	1199.2	702.9	629.6	709.1	733.7	686.2											High
[K].GKIEQTQASEK.[K]	2xTMT6plex [K2; K11]; 1xTMT6plex [N-Term]	FALSE	0.000148726	1	1	5	Q16363	Q16363 [1341-1351]		1	1906.12	1.1	0.112	1.517	0.951	0.866	1.156	1	1.39862e-08	0.991623	0.99995	0.999112	0.976863	10.01	824.04	38.45	7.67	10.24	29.23	1286.4	1169.2	1050.5	1660.6	732.5	666.9	890.3	770.5	853.6	26.65	17.34	11.52		44.8	42.58	25.72	51.27	19.09		High
[K].LHSSDMNGLVQK.[A]	1xTMT6plex [K12]; 1xTMT6plex [N-Term]	FALSE	0.000148726	1	1	4	Q16363	Q16363 [608-619]		0	1786.99	1.408	0.41	1.233	1.114	1.17	1.013	0.891553	0.338432	0.995354	0.99995	0.952251	0.99998	60.56	209.08	37.89	22.82	23.89	16.72	745.2	529.4	458.9	217.2	478	502.4	434.6	429.2	506.3	54.55	1.25	11.59	115.78	15.28	14.28	20.95	36.19	1.48		High
[K].LHSSDMNGLVQK.[A]	1xDeamidated [N7]; 1xTMT6plex [K12]; 1xTMT6plex [N-Term]	FALSE	0.000148726	1	1	2	Q16363	Q16363 [608-619]		0	1787.97	0.712	0.717	1.403	0.809	0.826	1.073	0.970528	0.981213	0.978532	0.871339	0.943953	0.99998	9.12	21.57	27.37	15.52	18.63	1.22	289.5	406.7	395.8	291.6	234.3	239.5	310.9	289.8	266.2	10.4	1.73	4.29	22.05	41.23	9.95	28.46	27.34	12.5		High
[K].IKGPIYLGGVAPGK.[A]	2xTMT6plex [K2; K14]; 1xTMT6plex [N-Term]	FALSE	0.000148726	1	1	1	Q16363	Q16363 [1588-1601]		1	2057.31	0.576	1.119	1.431	0.7	0.913	0.932	0.910542	0.95901	0.995354	0.516406	0.999112	0.99998	0	0	0	0	0	0	106.1	184.2	266.9	206.1	90.1	117.5	120	128.7	84.9											High
[K].VFLTVPSLSSTAEEK.[F]	1xTMT6plex [K15]; 1xTMT6plex [N-Term]	FALSE	0.000148726	1	1	7	Q16363	Q16363 [945-959]		0	2066.18	0.779	0.446	1.342	1.14	1.183	1.2	0.979403	0.26585	0.995354	0.99995	0.970567	0.812863	7.36	165.02	74.57	9.87	21.02	18.6	541.6	695.5	940.8	310.5	590.5	612.7	621.5	518.1	566	1.06	5.96	28.58	107.78	60.77	51.88	53.85	68.22	33.51		High
[K].AQINDAKYHEISIIYHNDKK.[M]	3xTMT6plex [K7; K19; K20]; 1xTMT6plex [N-Term]	FALSE	0.000148726	1	1	2	Q16363	Q16363 [1129-1148]		2	3316.88	0.47	1.698	3.444	1.597	1.59	0.928	0.514256	0.537333	0.280507	0.549216	0.325955	0.99998	83.4	494.53	131.55	35.05	79.04	30.81	209	444.3	762	754.6	206	205.1	119.7	129	103.7	4.87	72.97	29.6	123.57	61.15	38.86	3.14	31.77	49.27		High
[R].VDRDVEVEDFQR.[Y]	1xTMT6plex [N-Term]	FALSE	0.000148726	1	1	12	Q16363	Q16363 [1379-1390]		1	1735.88	1.204	1.498	1.031	1.12	1.097	1.2	0.99491	0.777656	0.998768	0.99995	0.999112	0.8902	0.93	24.41	9.86	35.04	9.89	43.03	1119.1	929.2	1049.2	1531.2	735.6	621.6	904.8	531	614.6	23.44	30.21	27.64	47.48	24.8	29.61	26.2	47.83	10.68		High
[R].VDRDVEVEDFQR.[Y]	1xDeamidated [Q11]; 1xTMT6plex [N-Term]	FALSE	0.000148726	1	1	1	Q16363	Q16363 [1379-1390]		1	1736.87	1.543	1.718	0.818	1.781	1.09	1.447	0.816632	0.720376	0.995354	0.301193	0.999112	0.301326	0	0	0	0	0	0	140.4	91	615.8	156.4	198.3	121.4	161.1	111.3	120.2											n/a
[K].CLDGYIGDSIR.[G]	1xMethylthio [C1]; 1xTMT6plex [N-Term]	FALSE	0.000148726	1	1	9	Q16363	Q16363 [113-123]	Q16363 1xMethylthio [C113]	0	1486.72	0.865	0.952	1.67	0.96	0.865	1.184	0.979403	0.955243	0.995354	0.99995	0.999112	0.957153	3.98	32.7	8.16	4.35	3.7	22.22	3426.3	3856.3	4536.3	3671.7	2733.6	2088.4	2749.1	2309	1980.4	37.24	43.91	42.15	16.35	22.87	21.52	2.62	20.7	15.04		High
[R].CICNENYAGPNCER.[C]	3xMethylthio [C1; C3; C12]; 1xTMT6plex [N-Term]	FALSE	0.000148726	1	1	8	Q16363	Q16363 [155-168]	Q16363 3xMethylthio [C155; C157; C166]	0	1952.75	0.805	1.241	1.856	0.93	0.852	1.324	0.922132	0.987237	0.922339	0.99995	0.995924	0.568394	20.37	35.55	61.42	11.94	14.48	43.07	986.9	1225.5	1555.8	1717.7	568.6	512.7	874.4	660.5	406.9	67.65	94.12	24.51	66.6	41.17	65.71	26.9	68.12	38.58		High
[K].YHEISIIYHNDK.[K]	1xTMT6plex [K12]; 1xTMT6plex [N-Term]	FALSE	0.000148726	1	1	1	Q16363	Q16363 [1136-1147]		0	1990.08	0.983	1.032	0.774	1.577	0.72	1.263	0.996411	0.976385	0.995354	0.422061	0.649438	0.854437	0	0	0	0	0	0	213.5	217.1	701	224.1	442.3	202	354.1	280.4	315											n/a
[K].YHEISIIYHNDKK.[M]	2xTMT6plex [K12; K13]; 1xTMT6plex [N-Term]	FALSE	0.000148726	1	1	5	Q16363	Q16363 [1136-1148]		1	2347.34	1.584	1.519	0.387	0.939	0.79	1.346	0.761314	0.63532	0.754024	0.99995	0.988876	0.546007	42.81	58.28	10.27	56.24	31.63	0.9	1144.8	329.4	861.9	497.1	853.7	718.7	831.9	909.4	1074.9	66.96	108.09	55.08	46.09	17.83	58	40.14	31.61	46.59		High
[K].YHEISIIYHNDKK.[M]	1xDeamidated [N10]; 2xTMT6plex [K12; K13]; 1xTMT6plex [N-Term]	FALSE	0.000148726	1	1	2	Q16363	Q16363 [1136-1148]		1	2348.32	1.543	0.133	0.786	0.835	0.836	1.126	0.64463	0.000319358	0.995354	0.931705	0.96849	0.994824	68.65	978.24	86.19	1.52	3.01	3.62	616.5	399.5	439.3	501.2	424.6	425	572.7	508.5	472.2	15.31	46.21	10.39		31.13	26.99	26.43	29.75	8.63		High
[K].AESSSDEAVADTSRR.[V]	1xTMT6plex [N-Term]	FALSE	0.000148726	1	1	2	Q16363	Q16363 [683-697]		1	1809.88	0.482	0.01	4.374	1.136	1.133	1.247	0.681296	1.02234e-16	0.159119	0.99995	0.999112	0.801185	0	0	0	0	0	0	101	209.6	139.8	0	54.5	54.3	59.8	47.9	106.9											n/a
[K].AESSSDEAVADTSR.[R]	1xTMT6plex [N-Term]	FALSE	0.000148726	1	1	2	Q16363	Q16363 [683-696]		0	1653.78	0.375	1.049	2.754	0.918	0.698	0.959	0.639202	0.972656	0.644771	0.99949	0.485118	0.99998	63.2	60.19	2.12	20.41	20.44	44.23	55.1	146.9	139.6	154.2	49	37.2	51.2	53.3	63.4	41.85	87.19	42.83	44.25	75.6	75.58	58.45	88.44	76.89		High
[K].AALVSGAVSINSCPAA.[-]	1xMethylthio [C13]; 1xTMT6plex [N-Term]	FALSE	0.000148726	1	1	4	Q16363	Q16363 [1808-1823]	Q16363 1xMethylthio [C1820]	0	1705.88	0.528	0.106	1.273	1.195	1.095	1.266	0.912994	0.0653538	0.995354	0.99995	0.999112	0.810193	38.06	781.93	20.43	47.4	26.59	129.22	56.2	106.4	465	84.3	99.9	91.5	105.8	83.6	69.3	14.65	48.56	87.47		13.25	5.95	72.57	30.7	54.11		n/a
[R].AASYFFDGSGYAVVR.[D]	1xTMT6plex [N-Term]	FALSE	0.000148726	1	1	6	Q16363	Q16363 [1047-1061]		0	1838.93	0.746	0.864	1.168	1.175	1.051	1.229	0.899651	0.98305	0.995354	0.99949	0.999112	0.86027	0	20.66	24.57	55.53	39.21	57.56	851.1	951.1	1017.7	475.5	703.7	796.3	736.1	599	934	68.66	62.24	62.39	88.03	37.44	58.13	38.1	74.79	38.04		High
[K].YNDGLWHDVIFIR.[E]	1xTMT6plex [N-Term]	FALSE	0.000148726	1	1	5	Q16363	Q16363 [1548-1560]		0	1876.99	0.841	1.113	1.03	1.042	0.815	1.358	0.999946	0.955853	0.99766	0.99995	0.915931	0.411217	26.99	10.77	61.99	5.2	19.1	14.45	317.4	278.5	367.6	248	200.3	295.5	414.6	305.3	335.1	41.59	47.49	45.65	31.12	61.46	43.26	32.61	50.02	18.97		High
[R].AIEHAYQYGGTANSR.[Q]	1xTMT6plex [N-Term]	FALSE	0.000148726	1	1	14	Q16363	Q16363 [1465-1479]		0	1866.93	0.686	0.746	0.653	1.333	1.114	1.287	0.908142	0.865584	0.984809	0.788099	0.985879	0.658361	21.13	66.58	2.88	18.49	6.76	42.07	495.9	749.5	514.1	594.8	1451.3	1219.1	1057.5	1147.2	897.9	25.89	4.96	44.54	67.58	34.41	61.21	46.02	55.07	76.92		High
[K].VQSVDKQYNDGLSHFVISSVSPTRYELIVDK.[S]	1xDeamidated [N9]; 2xTMT6plex [K6; K31]; 1xTMT6plex [N-Term]	FALSE	0.000148726	1	1	2	Q16363	Q16363 [1300-1330]		2	4212.28	0.68	0.01	4.039	2.175	1.313	0.953	0.988748	1.02234e-16	0.408534	0.0380684	0.93991	0.99998	0	0	0	0	0	0	46.9	68.9	124.6	0	37.1	22.4	16.3	17.1	40.9											n/a
[K].VNNGIRDFSTSVTPK.[Q]	1xTMT6plex [K15]; 1xTMT6plex [N-Term]	FALSE	0.000148726	1	1	3	Q16363	Q16363 [1709-1723]		1	2093.18	0.708	1.229	2.236	2.116	1.323	1.18	0.855999	0.970105	0.769407	0.0388096	0.817132	0.899165	11.71	86.53	50.22	83.97	30.76	16.22	851.7	962.1	2049.3	641.5	910.7	467.2	462.6	392.1	427.2	40.68	41.99	9.07	70.9	82.59	34.54	75.8	9.86	9.92		High
[R].SSSGTLVHGHSVNGEYLNVHMK.[N]	1xTMT6plex [K22]; 1xTMT6plex [N-Term]	FALSE	0.000148726	1	1	3	Q16363	Q16363 [1680-1701]		0	2811.46	0.555	0.864	1.34	0.911	0.931	0.984	0.873265	0.999966	0.995354	0.99949	0.999112	0.99998	8.15	10.67	16.39	7.41	41.64	40.21	123.8	204.2	354.4	117.9	138.9	110.7	137.2	139.5	135.6	18.55	34.38	44.76	91.35	16.01	33.74	28.64	14.22	16.48		High
[R].SSSGTLVHGHSVNGEYLNVHMK.[N]	1xOxidation [M21]; 1xTMT6plex [K22]; 1xTMT6plex [N-Term]	FALSE	0.000148726	1	1	1	Q16363	Q16363 [1680-1701]		0	2827.46	0.876	0.01	2.704	1.605	2.107	1.48	0.998494	1.02234e-16	0.648673	0.518142	0.0135984	0.289265	0	0	0	0	0	0	158.9	181.4	295.5	0	107.6	141.4	99.3	67.1	135.2											n/a
[R].SSSGTLVHGHSVNGEYLNVHMK.[N]	1xDeamidated [N13]; 1xOxidation [M21]; 1xTMT6plex [K22]; 1xTMT6plex [N-Term]	FALSE	0.000148726	1	1	2	Q16363	Q16363 [1680-1701]		0	2828.44	0.486	1.394	1.709	1.304	1.181	1.014	0.885124	0.826566	0.974388	0.960475	0.999112	0.99998	62.01	96.78	47.35	58.4	76.77	53.01	57.9	119.1	146.4	166.1	90.9	82.3	70.7	69.7	79.1	35.47	21.15	52.86	61.15	11.36	4.55	16.13	61.38	0.01		High
[R].DSNVVQLDVDSEVNHVVGPLNPKPIDHR.[E]	1xTMT6plex [K23]; 1xTMT6plex [N-Term]	FALSE	0.000148726	1	1	4	Q16363	Q16363 [1739-1766]		0	3550.9	1.069	0.509	0.556	0.658	0.611	0.767	0.979403	0.877691	0.938205	0.272604	0.161131	0.794425	14.36	109.38	32.44	14.8	46.15	53.05	168.5	174.6	188.2	86.1	161.4	193.6	243	245.2	250.3	32.35	58.49	31.52	5.78	55.7	49.58	53.52	32.52	23.71		High
[K].SKDAPSWDPVALK.[L]	2xTMT6plex [K2; K13]; 1xTMT6plex [N-Term]	FALSE	0.000148726	1	1	3	Q16363	Q16363 [1433-1445]		1	2101.23	0.994	1.88	0.811	1.085	0.682	1.111	0.998494	0.413603	0.995354	0.99995	0.569849	0.99998	19.99	23.45	27.85	22.42	62.51	19.71	676	630.3	1266	1093.2	843	529.7	856.5	776.9	640.6	36.71	19.24	52.08	11.41	41.51	38.68	20.34	7.52	70.59		High
[K].SKDAPSWDPVALKLPER.[N]	2xTMT6plex [K2; K13]; 1xTMT6plex [N-Term]	FALSE	0.000148726	1	1	3	Q16363	Q16363 [1433-1449]		2	2596.51	0.882	1.86	2.399	1.466	1.073	1.231	0.998494	0.400991	0.657985	0.611009	0.999112	0.884743	10.73	82.85	38.89	8.17	17.39	5.79	343.8	755.2	1245.4	619.9	531.7	267.7	439.7	343.8	331.8	58.91	43.95	36.42	86.32	38.26	42.88	34.09	28.11	20.98		High
[K].SGVLSVSSGAAAHR.[H]	1xTMT6plex [N-Term]	FALSE	0.000148726	1	1	12	Q16363	Q16363 [296-309]		0	1527.84	1.096	1.619	0.897	1.142	0.884	1.071	0.997206	0.645272	0.99766	0.99995	0.999112	0.99998	22.45	13.25	30.04	1.4	36.42	25.26	674.5	725.3	882.2	762.7	743.6	755.6	690.8	685.1	837.3	21.07	30.88	82.75	69.58	12.07	28.05	40.68	19.83	57.4		High
[K].DAPSWDPVALKLPER.[N]	1xTMT6plex [K11]; 1xTMT6plex [N-Term]	FALSE	0.000148726	1	1	4	Q16363	Q16363 [1435-1449]		1	2152.22	0.753	1.466	2.054	1.241	1.06	1.101	0.94472	0.804362	0.843031	0.975912	0.999112	0.983687	31.25	71.81	1.34	7.8	21.77	14.79	685.8	910.5	1332.2	1334.6	550.4	469.8	488.1	443.4	567.7	45.8	17.82	32.3	75.33	26.32	1.5	32.68	19.08	9.48		High
[K].DESENLLNQAR.[E]	1xTMT6plex [N-Term]	FALSE	0.000148726	1	1	3	Q16363	Q16363 [667-677]		0	1517.78	0.852	0.932	1.859	0.856	0.97	1.192	0.998494	0.995618	0.908551	0.945713	0.999112	0.924858	7.97	4.71	73.15	18.28	15.74	35.94	177.1	230.4	165.2	207.3	112.2	90.4	109.8	131.1	108.7	31.89	10.84	121.75	12.84	103.06	55.56	52.54	50.13	96.37		High
[R].LAALSIEEGK.[S]	1xTMT6plex [K10]; 1xTMT6plex [N-Term]	FALSE	0.000227648	1	1	7	Q16363	Q16363 [286-295]		0	1488.9	1.331	1.45	0.898	0.834	0.881	0.961	0.974275	0.796517	0.995354	0.970106	0.999112	0.99998	15.28	46.13	30.5	14.92	3.22	8.39	1866.5	1401.9	639.1	528.3	906.9	983.8	1212	1087.3	1303.9	55.82	66.99	137.14	124.34	58.74	68.71	63.43	68.85	94.71		High
[K].MLYYGEEHELSPK.[E]	1xOxidation [M1]; 1xTMT6plex [K13]; 1xTMT6plex [N-Term]	FALSE	0.000227648	1	1	11	Q16363	Q16363 [402-414]		0	2070.06	1.421	1.701	0.924	1.053	0.99	1.084	0.953253	0.596348	0.99766	0.99995	0.999112	0.99998	35.01	137.76	93.57	19.75	1.27	49	1602.7	1351.9	1922.2	1394.6	1291.5	1080.1	1421.7	1081.9	1678.8	35.73	59.93	73.44	114.16	30.14	38.97	23.85	61.95	35.56		High
[R].TLFPVVLEQLDDYNAK.[L]	1xTMT6plex [K16]; 1xTMT6plex [N-Term]	FALSE	0.000227648	1	1	2	Q16363	Q16363 [469-484]		0	2323.29	0.109	0.277	0.589	0.905	1.064	1.067	0.00693331	0.756082	0.9948	0.992977	0.999885	0.99998	800.41	2052.19	176.2	37.94	60.45	0.11	132.5	39.1	65.9	105.1	60.1	70.6	70.8	66.4	63.8		110.57	6.59		29.49	48.28	5.77	5.88	18.03		n/a
[R].IYDAVSGIDTQIIYHKDESENLLNQAR.[E]	2xDeamidated [Q11; N24]; 1xTMT6plex [K16]; 1xTMT6plex [N-Term]	FALSE	0.000227648	1	1	1	Q16363	Q16363 [651-677]		1	3565.84	1.417	0.488	1.207	1.529	1.205	1.197	0.887144	0.97293	0.99766	0.67379	0.995924	0.938669	0	0	0	0	0	0	144.3	101.9	94.2	49.8	129.1	101.7	101	84.4	147.4											n/a
[K].TKLSERENQYALR.[K]	1xTMT6plex [K2]; 1xTMT6plex [N-Term]	FALSE	0.000227648	1	1	2	Q16363	Q16363 [323-335]		2	2066.18	1.395	0.669	3.047	1.555	1.241	1.311	0.965671	0.774377	0.514015	0.420036	0.909087	0.48451	63.47	113.66	19.52	59.51	107.27	39.07	1261.8	904.5	653.9	604.7	461.7	368.5	389.3	296.9	300.6	22.95	34.94	48.91	60.14	66.71	70.88	19.62	17.03	4.87		High
[K].QYNDGLSHFVISSVSPTRYELIVDK.[S]	1xDeamidated [N3]; 1xTMT6plex [K25]; 1xTMT6plex [N-Term]	FALSE	0.000227648	1	1	1	Q16363	Q16363 [1306-1330]		1	3326.77	1.321	1.367	0.768	0.798	1.144	0.741	0.885124	0.743822	0.995354	0.817947	0.997321	0.706678	0	0	0	0	0	0	270.8	205	419.7	280.3	213.1	305.4	197.9	267	178.2											High
[R].NSHCHLSNSPR.[A]	1xMethylthio [C4]; 1xTMT6plex [N-Term]	FALSE	0.000227648	1	1	2	Q16363	Q16363 [1454-1464]	Q16363 1xMethylthio [C1457]	0	1526.72	2.948	2.717	1.284	0.659	0.64	0.826	0.0227451	0.14631	0.995354	0.373695	0.297794	0.965655	43.3	76.71	40.87	87.18	72.63	90.94	431.1	146.3	275.3	397.4	75.1	72.9	94.1	113.9	64.4	128.01	118.42	61.9	132.44	51.45	125.57	128.51	103.97	72.28		High
[R].VLEESLPPTEATWK.[I]	1xTMT6plex [K14]; 1xTMT6plex [N-Term]	FALSE	0.000227648	1	1	10	Q16363	Q16363 [1574-1587]		0	2058.15	0.949	0.939	1.209	1.71	0.905	0.993	0.997869	0.998783	0.995354	0.201379	0.999112	0.99998	0.51	12.85	19.62	8.55	3.18	6.8	833.8	878.2	1222.5	618.6	1036.7	594.1	950.3	622.3	813	37.37	33.98	40.25	18.46	49.94	29.14	24.56	31.94	12.6		High
[K].IQINNAENTMK.[S]	1xOxidation [M10]; 1xTMT6plex [K11]; 1xTMT6plex [N-Term]	FALSE	0.000227648	1	1	5	Q16363	Q16363 [337-347]		0	1749.96	1.113	1.042	1.419	1.005	0.885	1.254	0.976453	0.96765	0.9948	0.99995	0.999112	0.790318	42.73	88.7	43.94	32.74	1.51	5.15	363.9	269.4	322.5	222.1	191.7	169.7	238.1	189.9	259.3	56.12	75.99	19.38	30.11	5.25	45.18	17.26	44.8	15.93		High
[K].IEQTQASEK.[K]	1xTMT6plex [K9]; 1xTMT6plex [N-Term]	FALSE	0.000227648	1	1	6	Q16363	Q16363 [1343-1351]		0	1491.84	1.073	1.233	1.324	0.999	0.981	1.21	0.998494	0.961293	0.995354	0.99995	0.999112	0.862923	47.84	10.85	6.66	45.7	8.53	45.85	1100	775.1	1579.9	955.4	929.6	735.5	1067.3	917.5	1230.4	21.7	52.77	43.94	35.76	44.73	19.48	4.34	34.88	22.06		High
[K].IEQTQASEK.[K]	1xDeamidated [Q3]; 1xTMT6plex [K9]; 1xTMT6plex [N-Term]	FALSE	0.000227648	1	1	1	Q16363	Q16363 [1343-1351]		0	1492.83	1.059	1.379	0.879	1.411	0.939	1.431	0.988486	0.860362	0.995354	0.856737	0.999112	0.445806	0	0	0	0	0	0	118.5	111.8	383.8	154.2	179.5	119.4	182	127.2	242.2											n/a
[K].SLLSDVEELVEKENQASR.[K]	1xTMT6plex [K12]; 1xTMT6plex [N-Term]	FALSE	0.000227648	1	1	2	Q16363	Q16363 [348-365]		1	2504.36	0.977	0.814	1.697	1.238	1.43	1.348	0.99604	0.999966	0.955055	0.99995	0.67217	0.576909	66.45	10.67	1.37	33.47	86.75	87.31	171.5	175.5	424.1	142.9	128.1	147.9	139.5	103.4	123	4	54.47	93.79	45.58	78.01	104.81	105.01	53.35	73.19		High
[R].CAPGYYGDAR.[I]	1xMethylthio [C1]; 1xTMT6plex [N-Term]	FALSE	0.000227648	1	1	9	Q16363	Q16363 [224-233]	Q16363 1xMethylthio [C224]	0	1347.6	0.542	0.688	1.99	0.867	0.821	1.109	0.516146	0.480685	0.984809	0.99949	0.999112	0.99998	13.57	2.33	26.58	12.82	3.27	0.46	1880.3	3469.7	2845.4	2386.5	1511.3	1400.6	1699.7	1743.2	1389.4	69.79	80.24	56.59	71.35	48.59	65.45	57.47	55.49	60.29		High
[R].AYFNGQSFIASIQK.[I]	1xDeamidated [N4]; 1xTMT6plex [K14]; 1xTMT6plex [N-Term]	FALSE	0.000227648	1	1	1	Q16363	Q16363 [1237-1250]		0	2033.11	1.186	2.272	1.738	1.109	0.873	1.075	0.979403	0.452077	0.967669	0.99995	0.995277	0.99998	0	0	0	0	0	0	92.3	77.8	131.9	176.8	49.6	39.1	48.1	44.8	61											n/a
[R].AYFNGQSFIASIQK.[I]	1xTMT6plex [K14]; 1xTMT6plex [N-Term]	FALSE	0.000227648	1	1	1	Q16363	Q16363 [1237-1250]		0	2032.13																																					No Quan Values	n/a
[R].AIEHAYQYGGTANSR.[Q]	1xDeamidated [N13]; 1xTMT6plex [N-Term]	FALSE	0.000227648	1	1	3	Q16363	Q16363 [1465-1479]		0	1867.91	0.685	1.149	1.691	1.211	1.18	1.246	0.979403	0.930109	0.947786	0.99995	0.995924	0.760502	131.47	54.64	147.41	3.93	17.34	7.04	151.3	220.8	282.9	253.7	158.2	154.1	162.7	130.6	134.2	36.13	69.48	23.92	101.19	49.58	60.39	52.16	46.26	16.72		High
[K].GPIYLGGVAPGK.[A]	1xTMT6plex [K12]; 1xTMT6plex [N-Term]	FALSE	0.000227648	1	1	4	Q16363	Q16363 [1590-1601]		0	1586.97	1.813	1.067	0.964	0.872	1.113	1.17	0.474001	0.969055	0.999221	0.952635	0.999112	0.934412	24.94	145.2	40.76	9.85	4.85	16.26	356.5	196.7	215	209.9	177.9	227.1	238.8	204.1	189.8	33.37	54.69	30.51	60.68	9.89	23.7	34.08	19.17	24.32		High
[R].DVEVEDFQR.[Y]	1xTMT6plex [N-Term]	FALSE	0.000227648	1	1	2	Q16363	Q16363 [1382-1390]		0	1365.68	0.877	3.483	2.538	0.992	0.918	0.968	0.99491	0.0113419	0.693565	0.99995	0.999112	0.99998	40.69	402.32	41.93	63.04	51.45	55.72	747	851.5	708.1	2966.1	332.8	307.9	325	335.6	404	96.46	72.03	131.02	138.53	85.11	78.25	80.87	38.95	99.08		High
[R].ENQYALRK.[I]	1xTMT6plex [K8]; 1xTMT6plex [N-Term]	FALSE	0.000227648	1	1	5	Q16363	Q16363 [329-336]		1	1479.87	1.58	1.821	0.926	0.958	1.011	1.142	0.867803	0.468042	0.99766	0.99995	0.999112	0.99185	29.56	144.4	67.51	7.43	11.9	6.33	2789	647.6	674	868.4	1348.8	1308.8	1737.4	1408	1465	57.08	90.49	128.99	112.08	58.64	41.4	53.41	52.15	22.03		High
[R].DKIQEINNK.[M]	2xTMT6plex [K2; K9]; 1xTMT6plex [N-Term]	FALSE	0.000227648	1	1	10	Q16363	Q16363 [393-401]		1	1789.08	2.121	1.652	0.686	0.75	0.756	1.108	0.476302	0.6134	0.988236	0.771693	0.949234	0.99998	28.28	43.92	10.17	15.69	1.72	19.42	2144.1	998.5	771.6	1482.2	987.4	1121.9	1825.2	1456.1	1447.6	52.25	25.76	116.37	51.13	46.32	35.02	49.29	34.51	9.91		High
[R].DKLAFTQSR.[A]	1xTMT6plex [K2]; 1xTMT6plex [N-Term]	FALSE	0.000283189	1	1	5	Q16363	Q16363 [1038-1046]		1	1523.89	0.65	1.206	2.058	1.379	0.925	1.252	0.825624	0.963809	0.853595	0.769151	0.999112	0.78178	27.38	62.04	52.84	48.54	14.5	12.46	674.2	680.6	1727.6	821.1	583.9	645.9	722.3	629.7	592.2	23.91	42.47	69.94	18.97	98.02	51.12	84.11	57.06	83.81		High
[R].DKIQEINNK.[M]	1xDeamidated [N]; 2xTMT6plex [K2; K9]; 1xTMT6plex [N-Term]	FALSE	0.000283189	1	1	3	Q16363	Q16363 [393-401]		1	1790.06	1.405	1.774	0.804	1.031	1.004	0.971	0.89153	0.500013	0.995354	0.99995	0.999112	0.99998	19.2	10.83	32.71	15.6	18.82	17.44	781.1	556.1	1167.8	986.2	713.3	695	671.5	691.9	910.6	90.48	78.79	36.63	85.61	89.18	87.32	105.56	97.55	60.66		High
[R].DFSTSVTPK.[Q]	1xTMT6plex [K9]; 1xTMT6plex [N-Term]	FALSE	0.000283189	1	1	6	Q16363	Q16363 [1715-1723]		0	1439.81	2.075	1.334	0.66	0.81	0.99	1.091	0.419183	0.908627	0.9948	0.933368	0.999112	0.996828	8.04	65.68	3.27	10.95	18.16	17.31	1179.2	678.9	786.2	1120.1	879.7	922	1137.7	1006.2	1029.1	35.34	14.66	52.28	29.58	41.56	49.9	33.12	37.15	25.08		High
[K].LSERENQYALRK.[I]	1xTMT6plex [K12]; 1xTMT6plex [N-Term]	FALSE	0.000283189	1	1	3	Q16363	Q16363 [325-336]		2	1965.13	0.92	1.005	1.797	1.287	1.542	1.259	0.991025	0.999966	0.919672	0.936684	0.282396	0.712228	40.78	104.1	51.83	45.1	73.42	61.66	988	878.9	1347.8	575.3	616.9	755.4	360.3	489.1	496.4	76.44	30.04	90.45	86.88	19	69.13	61.38	30.79	29.51		High
[K].KAQINDAK.[Y]	2xTMT6plex [K1; K8]; 1xTMT6plex [N-Term]	FALSE	0.000283189	1	1	4	Q16363	Q16363 [1128-1135]		1	1574.98	2.376	1.315	0.702	0.9	0.859	1.097	0.238657	0.903365	0.995354	0.99995	0.999112	0.99998	16.54	130.75	34.63	3.31	6.86	40.71	1409.9	593.5	843.3	1515.9	1115.7	814.6	1308.2	1211.6	988.1	17.34	43.58	110.73	4.66	58.96	47.57	20.24	44.28	40.14		High
[R].QDPPETSEPR.[V]	1xTMT6plex [N-Term]	FALSE	0.000283189	1	1	2	Q16363	Q16363 [45-54]		0	1384.69	0.24	0.459	2.386	0.9	0.734	0.779	0.0141481	0.520836	0.639875	0.985749	0.691506	0.876724	0	0	0	0	0	0	116	483.2	79.8	222	182.3	148.7	157.8	202.5	227.5											High
[R].KIQINNAENTMK.[S]	1xDeamidated [N/Q]; 2xTMT6plex [K1; K12]; 1xTMT6plex [N-Term]	FALSE	0.000283189	1	1	2	Q16363	Q16363 [336-347]		1	2092.2	0.7	0.979	1.871	1.254	1.013	1.432	0.983744	0.987904	0.91604	0.99949	0.999975	0.411814	19.49	9	41.43	57.2	32.94	8.29	137.1	195.8	327.4	191.8	131.3	106.1	149.9	104.7	150.1	28.16	45.41	93.44	52.94	106.85	96.17	82.23	76.83	113.86		High
[R].LITEEANR.[T]	1xTMT6plex [N-Term]	FALSE	0.000283189	1	1	7	Q16363	Q16363 [736-743]		0	1174.66	0.712	0.867	2.086	1.072	1.005	1.253	0.830514	0.939014	0.84929	0.99995	0.999975	0.676394	12.93	2.87	43.64	20.86	1.76	36.28	812.5	1240.5	1397.9	1075.2	547.8	483.7	562.9	594.8	464.7	80.2	83.17	61.5	72.53	44.28	59.32	48.43	53.69	72.23		High
[K].IEQTQASEKK.[F]	2xTMT6plex [K9; K10]; 1xTMT6plex [N-Term]	FALSE	0.000283189	1	1	2	Q16363	Q16363 [1343-1352]		1	1849.1	0.869	1.022	1.14	1.13	0.97	0.975	0.997395	0.994973	0.995354	0.99995	0.999975	0.99998	102.79	30.73	0.7	36.61	10.81	21.81	470.4	541.5	1166.8	553.5	536.4	460.7	462.8	474.8	430.2	105.08	42.49	1.46	67.1	9.91	52.22	60.97	43.09	29.46		High
[K].EYMGLAIK.[N]	1xTMT6plex [K8]; 1xTMT6plex [N-Term]	FALSE	0.000531151	1	1	5	Q16363	Q16363 [893-900]		0	1382.81	1.013	1.276	0.534	0.686	0.554	0.807	1	0.948524	0.956589	0.5402	0.271452	0.942563	27.31	97.82	70.27	41.17	15.74	71.31	1028.6	641.5	1121.6	1030.5	564.6	843.5	923.3	1146.5	1182.1	33.95	56.76	70.96	38.18	58.24	17.09	53.63	50.31	8.52		High
[K].IQINNAENTMK.[S]	1xDeamidated [N/Q]; 1xOxidation [M10]; 1xTMT6plex [K11]; 1xTMT6plex [N-Term]	FALSE	0.000531151	1	1	3	Q16363	Q16363 [337-347]		0	1750.94	0.589	0.544	1.775	2.027	1.058	1.666	0.875576	0.851655	0.956232	0.0841742	0.999112	0.111823	13.09	110.5	22.3	7.62	3.17	47.86	183.9	312.1	505.3	169.8	356.6	186.1	293	175.9	309.8	55.62	44.73	53.93	49.05	17.76	21.92	19.65	24.86	45.92		n/a
[R].AHLPLDINFR.[G]	1xTMT6plex [N-Term]	FALSE	0.000599948	1	1	5	Q16363	Q16363 [1190-1199]		0	1424.82	1.121	0.949	1.63	0.934	0.97	0.967	0.998494	0.969192	0.995354	0.99995	0.999885	0.99998	12.66	22.86	16.47	8.04	4.04	16.03	1820.8	1515.7	2468.9	1437.9	826.9	811.6	809	836.8	860.3	51.71	47.59	54.17	64.95	51.01	53.03	59.32	31.68	56.8		High
[K].VQSVDKQYNDGLSHFVISSVSPTRYELIVDK.[S]	2xTMT6plex [K6; K31]; 1xTMT6plex [N-Term]	FALSE	0.00067056	1	1	1	Q16363	Q16363 [1300-1330]		2	4211.3	0.563	0.01	0.847	1.665	0.629	0.667	0.960305	1.02234e-16	0.999998	0.388948	0.336884	0.462321	0	0	0	0	0	0	16.6	29.4	53.4	0	57.9	21.9	23.2	34.8	29.6											n/a
[K].DAPSWDPVALK.[L]	1xTMT6plex [K11]; 1xTMT6plex [N-Term]	FALSE	0.00067056	1	1	1	Q16363	Q16363 [1435-1445]		0	1656.94	0.743	0.658	1.61	0.881	0.629	0.711	0.979403	0.957684	0.946577	0.961992	0.254401	0.560892	0	0	0	0	0	0	269.5	362.9	89.9	238.8	198.4	141.8	160.3	225.3	193.7											High
[K].KAQINDAK.[Y]	1xDeamidated [Q3]; 2xTMT6plex [K1; K8]; 1xTMT6plex [N-Term]	FALSE	0.000964462	1	1	1	Q16363	Q16363 [1128-1135]		1	1575.97	1.579	1.59	0.658	0.963	0.682	0.826	0.618778	0.48093	0.989097	0.99995	0.454788	0.975735	0	0	0	0	0	0	594.3	376.4	1184.8	598.7	551.1	390.3	472.6	572.3	544.4											n/a
[R].KLHSSDMNGLVQK.[A]	1xOxidation [M7]; 2xTMT6plex [K1; K13]; 1xTMT6plex [N-Term]	FALSE	0.00125907	1	1	3	Q16363	Q16363 [607-619]		1	2160.24	0.393	0.691	1.988	1.572	0.982	1.455	0.620071	0.987237	0.925911	0.549659	0.999112	0.352736	66.23	39.82	2	14.51	13.7	70.75	92.8	130.7	235.6	128.3	74.9	51.9	44.5	52.8	69.8	0.15	44.52	57.79	27.51	61.6	48.93	112.76	67.89	61.78		n/a
[K].IQEINNK.[M]	1xTMT6plex [K7]; 1xTMT6plex [N-Term]	FALSE	0.00132057	1	1	6	Q16363	Q16363 [395-401]		0	1316.79	1.251	1.388	0.947	0.911	0.907	0.943	0.979403	0.851485	0.999998	0.99995	0.999112	0.99998	38.22	109.64	50.43	16.51	16.59	45.24	1068.1	707.7	486.4	1204.2	573.1	677.4	807.5	747.1	965.2	27.35	16.84	134.75	28.43	40.65	12.89	33.96	28.69	25.03		High
[K].KCDCSGNSDPNLIFEDCDEVTGQCR.[N]	4xMethylthio [C2; C4; C17; C24]; 1xTMT6plex [K1]; 1xTMT6plex [N-Term]	FALSE	0.0013923	1	1	1	Q16363	Q16363 [186-210]	Q16363 4xMethylthio [C187; C189; C202; C209]	1	3390.38	0.665	0.892	2.057	1.24	1.569	1.938	0.979403	0.999237	0.867892	0.99995	0.446897	0.00547014	0	0	0	0	0	0	136.1	204.6	265.3	182.5	123.3	156	192.7	99.4	217.9											n/a
[R].DKLAFTQSR.[A]	1xDeamidated [Q7]; 1xTMT6plex [K2]; 1xTMT6plex [N-Term]	FALSE	0.0014373	1	1	1	Q16363	Q16363 [1038-1046]		1	1524.88																																					No Quan Values	n/a
[K].LAFTQSR.[A]	1xTMT6plex [N-Term]	FALSE	0.0014373	1	1	5	Q16363	Q16363 [1040-1046]		0	1051.61	0.971	0.249	0.944	1.117	0.945	1.048	0.998494	0.136832	0.999998	0.99995	0.999112	0.99998	48.39	228.57	7.94	13.27	34.95	18.26	317.5	326.9	399.7	81.5	386.9	327.2	363	346.2	394.4	23.85	64.36	36.26	132.44	60.27	42.63	56.35	70.22	27.75		High
[R].NSHCHLSNSPR.[A]	1xDeamidated [N1]; 1xMethylthio [C4]; 1xTMT6plex [N-Term]	FALSE	0.0014373	1	1	1	Q16363	Q16363 [1454-1464]	Q16363 1xMethylthio [C1457]	0	1527.7																																					No Quan Values	n/a
[K].NGQVIVK.[V]	1xTMT6plex [K7]; 1xTMT6plex [N-Term]	FALSE	0.00154599	1	1	4	Q16363	Q16363 [1702-1708]		0	1215.78	1.406	1.721	0.571	0.849	0.695	0.969	0.890716	0.554078	0.956232	0.98845	0.762112	0.99998	12.78	32.96	63.88	54.13	12.97	26.26	827.1	510.1	688.4	1012	758.2	658.4	848	1030.6	675.5	40.17	10.08	87.4	56.01	73.69	32.45	41.34	48.8	39.52		High
[K].IQEINNK.[M]	1xDeamidated [Q2]; 1xTMT6plex [K7]; 1xTMT6plex [N-Term]	FALSE	0.0016057	1	1	3	Q16363	Q16363 [395-401]		0	1317.78	0.855	0.111	1.16	0.831	0.843	1.155	0.998494	8.98503e-05	0.995354	0.927091	0.995205	0.97819	2.35	812.83	7.84	4.59	0.89	9.08	360.4	421.5	432.1	328.6	302.1	306.4	419.7	363.5	699.6	57.78	59.63	45.22		49.56	52.63	60.6	53.35	34.28		High
[R].LVIDGLR.[V]	1xTMT6plex [N-Term]	FALSE	0.0016057	1	1	7	Q16363	Q16363 [1567-1573]		0	1014.65	1.072	1.312	1.114	0.98	0.751	1.332	0.998494	0.973902	0.998947	0.99995	0.939944	0.67751	1.32	20.37	26.56	47.62	38.94	61.28	3049.3	2819.5	4048.5	1423.8	1811.2	1700.1	2305.9	1730.6	1823.4	60.98	51.6	25.94	93.95	11.72	40.77	4.7	48.84	26.13		High
[K].CDCSGNSDPNLIFEDCDEVTGQCR.[N]	4xMethylthio [C1; C3; C16; C23]; 1xTMT6plex [N-Term]	FALSE	0.00172058	1	1	1	Q16363	Q16363 [187-210]	Q16363 4xMethylthio [C187; C189; C202; C209]	0	3033.12			0.01	1.39	1.142	0.79			6.41184e-16	0.84278	0.999112	0.941277			0	0	0	0	0	0	0	0	59	48.5	33.5	42.4	37											n/a
[K].SLLSDVEELVEK.[E]	1xTMT6plex [K12]; 1xTMT6plex [N-Term]	FALSE	0.00178803	1	1	1	Q16363	Q16363 [348-359]		0	1819.05																																					No Quan Values	n/a
[K].AQINDAK.[Y]	1xTMT6plex [K7]; 1xTMT6plex [N-Term]	FALSE	0.00226342	1	1	6	Q16363	Q16363 [1129-1135]		0	1217.73	2.342	1.789	0.477	0.747	0.573	1.012	0.338439	0.567707	0.863211	0.763982	0.323189	0.99998	4.6	65.15	31.61	30.43	0.55	14.06	2120.8	1281.9	1742.6	2277.1	1667.4	1532.2	2258.4	2232.2	2351.8	41.75	25.44	116.38	0.98	54.34	10.72	8.59	28.67	30.96		High
[K].QLQAAER.[G]	1xTMT6plex [N-Term]	FALSE	0.00232759	1	1	3	Q16363	Q16363 [718-724]		0	1044.6	0.703	0.851	2.006	1.126	0.787	1.143	0.886246	0.963055	0.844356	0.99995	0.906389	0.97835	1.41	54.56	11.99	10.17	1.85	7.91	644.6	925.6	1019.5	719.7	598.1	455.2	598.1	496.9	640.7	42.57	47.73	23.85	64.47	17.78	19.99	19.94	28.58	12.31		High
[R].ENQYALR.[K]	1xDeamidated [N2]; 1xTMT6plex [N-Term]	FALSE	0.00245342	1	1	2	Q16363	Q16363 [329-335]		0	1123.59	1.227	2.607	1.532	0.829	0.647	0.907	0.933767	0.0799992	0.961068	0.88372	0.325279	0.99998	188.18	58.57	93.13	9.83	53.38	31.05	457.7	373	433.7	972.5	201.8	157.7	220.9	243.6	226.7	99.17	26.52	79.72	73.43	61.89	7.11	27.24	54.1	32.84		High
[R].ELIAQTR.[S]	1xTMT6plex [N-Term]	FALSE	0.00245342	1	1	5	Q16363	Q16363 [820-826]		0	1059.64	1.341	1.27	0.786	0.45	0.743	0.85	0.979403	0.972656	0.995354	0.0122129	0.945087	0.99185	30.14	147.09	59.38	14.97	47.37	55.11	1231	1151.9	1521.6	1507	660	1089.3	1169.8	1376.3	1457.4	41.65	53.34	81.69	4.19	49.5	46.61	27.26	15.64	35.52		High
[R].QEFEHLK.[G]	1xTMT6plex [K7]; 1xTMT6plex [N-Term]	FALSE	0.00379428	1	1	4	Q16363	Q16363 [1480-1486]		0	1388.79	1.744	1.201	0.759	0.661	0.74	1.068	0.758621	0.998582	0.9948	0.441771	0.915931	0.99998	5.11	22.32	12.97	26.39	49.86	25.71	2778.4	1593.4	1519.9	1913.9	1386.7	1553	2241.7	2098.3	1650.8	8.54	3.67	75.82	17.45	33.09	37.14	15.65	8.67	0.59		High
[R].VGGALAR.[K]	1xTMT6plex [N-Term]	FALSE	0.00390923	1	1	4	Q16363	Q16363 [698-704]		0	872.552	0.808	0.98	1.595	0.932	0.915	1.304	0.957705	0.972709	0.995354	0.99995	0.999975	0.726598	42.82	34.73	22.04	5.96	36.64	41.21	1916.6	1960.6	2297.6	1922.2	1145.3	1098.7	1509.8	1229.4	1587.3	55.9	63.9	19.93	44.72	14.03	28.89	13.01	49.07	22.69		High
[R].YELIVDK.[S]	1xTMT6plex [K7]; 1xTMT6plex [N-Term]	FALSE	0.00401621	1	1	3	Q16363	Q16363 [1324-1330]		0	1337.81	2.421	1.573	0.33	0.312	0.412	0.814	0.280541	0.679812	0.582917	3.00985e-05	0.0137534	0.953536	76.38	70.76	44.7	6.16	33.58	68.8	1546.1	397.2	342.7	1361.3	1153	1025	1299	1600.1	1407.5	27.35	77.62	161.04	57.69	62.37	52.57	1.11	77.43	97.18		High
[R].VGSKNPTK.[G]	2xTMT6plex [K4; K8]; 1xTMT6plex [N-Term]	FALSE	0.00412748	1	1	1	Q16363	Q16363 [1333-1340]		1	1517.96	0.935	2.915	2.489	1.731	0.7	1.076	0.998494	0.0542708	0.605375	0.323447	0.486333	0.99998	0	0	0	0	0	0	399	426.6	1268.7	1243.2	296.7	119.9	184.4	171.4	169.2											n/a
[K].RPELTETADQFILYLGSK.[N]	1xTMT6plex [K18]; 1xTMT6plex [N-Term]	FALSE	0.00496571	1	1	1	Q16363	Q16363 [871-888]		0	2539.42	1.107	0.01	1.665	1.029	1.091	1.012	0.979403	1.02234e-16	0.966433	0.99995	0.999112	0.99998	0	0	0	0	0	0	379.8	343	422.4	0	212	224.8	208.5	206	215											n/a
[K].MILVVDR.[R]	1xTMT6plex [N-Term]	FALSE	0.00508471	1	1	1	Q16363	Q16363 [1149-1155]		0	1074.65	0.933	0.986	0.635	0.878	0.468	0.913	0.998494	0.988814	0.984809	0.982859	0.00558311	0.99998	0	0	0	0	0	0	243.1	260.6	364.9	257	360.5	192	374.6	410.5	333.2											High
[K].NGQVIVK.[V]	1xDeamidated [N1]; 1xTMT6plex [K7]; 1xTMT6plex [N-Term]	FALSE	0.00545357	1	1	5	Q16363	Q16363 [1702-1708]		0	1216.77	1.166	0.695	1.015	0.85	1.013	1.093	0.985184	0.918463	0.999998	0.989138	0.999112	0.996828	18.39	75.4	37.31	31.52	22.7	16.41	783	671.6	998.6	466.8	562.5	670.8	723.4	662	597	90.38	79.21	71.29	20.24	75.44	69.34	64.72	51.77	72.69		High
[K].LVLAQK.[M]	1xTMT6plex [K6]; 1xTMT6plex [N-Term]	FALSE	0.00551254	1	1	2	Q16363	Q16363 [420-425]		0	1129.77	1.174	0.127	1.23	0.787	0.908	0.106	0.97965	0.282541	0.995354	0.767131	0.999112	1.24949e-15	87.72	937.19	73.17	47.93	18.9	778.01	91.5	77.9	322.3	71.3	49.9	57.6	78.2	63.4	88.2	1.27	72.96			30.97	4.5		13.44	38.32		n/a
[K].QSLCDGR.[W]	1xMethylthio [C4]; 1xTMT6plex [N-Term]	FALSE	0.00566517	1	1	1	Q16363	Q16363 [1724-1730]	Q16363 1xMethylthio [C1727]	0	1053.5	1.13	1.547	0.723	1.303	0.797	1.091	0.982624	0.674759	0.995354	0.839116	0.933219	0.99998	0	0	0	0	0	0	591.3	523.4	1644.3	809.9	943.5	577.2	790.2	724	737.1											n/a
[R].ENQYALR.[K]	1xTMT6plex [N-Term]	FALSE	0.0059034	1	1	3	Q16363	Q16363 [329-335]		0	1122.61	1.473	1.579	0.706	0.363	0.628	0.747	0.781078	0.682956	0.995354	0.00112444	0.28129	0.767297	50.66	147.32	44.64	4.57	60.68	73.21	527	543.3	591	968	279.6	483.4	687.1	769.6	789.3	30.01	43.8	123.39	17.01	70.16	36.82	54.13	23.96	65.06		High
[R].DHEKQQER.[V]	1xTMT6plex [K4]; 1xTMT6plex [N-Term]	FALSE	0.0059034	1	1	1	Q16363	Q16363 [515-522]		1	1527.83	1.936	1.369	0.189	1.286	0.461	0.69	0.713871	0.926678	0.0371566	0.925588	0.00182064	0.4505	0	0	0	0	0	0	111.4	57.6	1214.2	78.8	391.6	140.2	210.2	304.4	212.1											n/a
[K].DFNLLEQTETLGVGYGCPEDSLISR.[R]	1xMethylthio [C17]; 1xTMT6plex [N-Term]	FALSE	0.00657636	1	1	1	Q16363	Q16363 [1211-1235]	Q16363 1xMethylthio [C1227]	0	3031.46	0.63	0.646	1.533	1.02	3.249	2.364	0.977073	0.987904	0.991623	0.99995	1.07667e-06	0.00105269	0	0	0	0	0	0	74.6	118.4	93	76.5	78.7	250.9	182.6	77.2	105.4											n/a
[K].FGQVTRFDIEVR.[T]	1xTMT6plex [N-Term]	FALSE	0.00678791	1	1	1	Q16363	Q16363 [1069-1080]		1	1695.94	0.557	0.625	1.494	2.001	0.913	1.945	0.880907	0.968226	0.984809	0.103168	0.999112	0.0161399	0	0	0	0	0	0	131.7	236.4	209.4	147.7	316.6	144.5	307.8	158.3	164.9											n/a
[K].MILVVDRR.[H]	1xTMT6plex [N-Term]	FALSE	0.00795119	1	1	1	Q16363	Q16363 [1149-1156]		1	1230.76																																					No Quan Values	n/a
[R].GDAQQR.[L]	1xTMT6plex [N-Term]	FALSE	0.00857365	1	1	1	Q16363	Q16363 [725-730]		0	903.485	0.891	1.357	1.912	0.836	0.645	0.856	0.999483	0.687372	0.907163	0.912368	0.364316	0.997325	0	0	0	0	0	0	256.4	287.8	227.2	390.5	125.8	97	128.8	150.5	125.9											High
P58546	Myotrophin [OS=Homo sapiens]	0.002	3.795	14	1	1	1	118	12.9	5.52	3.94	1	cell organization and biogenesis;other metabolic processes;developmental processes;other biological processes	cytosol;cytoskeleton;nucleus;other cell component	nucleic acid binding activity	Pf12796	136319	ENSG00000105887	MTPN	hsa:136319; P58546			0	0	1.052	0.849	1.039	1.36	0.827	1.233	0.921663	0.984049	0.998576	0.651154	0.866276	0.680269	0	0	0	0	0	0	244.1	232.2	282.1	197	303.9	184.7	275.5
Annotated Sequence	Modifications	Contaminant	Qvality q-value	# Protein Groups	# Proteins	# PSMs	Master Protein Accessions	Positions in Master Proteins	Modifications in Master Proteins	# Missed Cleavages	Theo. MH+ [Da]	Abundance Ratio: (Hyperoxic 0-95) / (Hyperoxic 21)	Abundance Ratio: (Hyperoxic 95) / (Hyperoxic 21)	Abundance Ratio: (Hyperoxic 21) / (Hypoxic 21)	Abundance Ratio: (Hypoxic 0-21) / (Hypoxic 21)	Abundance Ratio: (Hypoxic 10) / (Hypoxic 21)	Abundance Ratio: (Hypoxic 2) / (Hypoxic 21)	Abundance Ratio Adj. P-Value: (Hyperoxic 0-95) / (Hyperoxic 21)	Abundance Ratio Adj. P-Value: (Hyperoxic 95) / (Hyperoxic 21)	Abundance Ratio Adj. P-Value: (Hyperoxic 21) / (Hypoxic 21)	Abundance Ratio Adj. P-Value: (Hypoxic 0-21) / (Hypoxic 21)	Abundance Ratio Adj. P-Value: (Hypoxic 10) / (Hypoxic 21)	Abundance Ratio Adj. P-Value: (Hypoxic 2) / (Hypoxic 21)	Abundance Ratio Variability [%]: (Hyperoxic 0-95) / (Hyperoxic 21)	Abundance Ratio Variability [%]: (Hyperoxic 95) / (Hyperoxic 21)	Abundance Ratio Variability [%]: (Hyperoxic 21) / (Hypoxic 21)	Abundance Ratio Variability [%]: (Hypoxic 0-21) / (Hypoxic 21)	Abundance Ratio Variability [%]: (Hypoxic 10) / (Hypoxic 21)	Abundance Ratio Variability [%]: (Hypoxic 2) / (Hypoxic 21)	Abundances (Grouped): Hyperoxic 0-95	Abundances (Grouped): Hyperoxic 21	Abundances (Grouped): Hyperoxic 40	Abundances (Grouped): Hyperoxic 95	Abundances (Grouped): Hypoxic 0-21	Abundances (Grouped): Hypoxic 10	Abundances (Grouped): Hypoxic 2	Abundances (Grouped): Hypoxic 21	Abundances (Grouped): SM	Abundances (Grouped) CV [%]: Hyperoxic 0-95	Abundances (Grouped) CV [%]: Hyperoxic 21	Abundances (Grouped) CV [%]: Hyperoxic 40	Abundances (Grouped) CV [%]: Hyperoxic 95	Abundances (Grouped) CV [%]: Hypoxic 0-21	Abundances (Grouped) CV [%]: Hypoxic 10	Abundances (Grouped) CV [%]: Hypoxic 2	Abundances (Grouped) CV [%]: Hypoxic 21	Abundances (Grouped) CV [%]: SM	Quan Info	Found in Sample: F5: 130N, Sample, Hyperoxic 0-95, D1
[K].GPDGLTAFEATDNQAIK.[A]	1xTMT6plex [K17]; 1xTMT6plex [N-Term]	FALSE	0.000227648	1	1	1	P58546	P58546 [98-114]		0	2206.18	1.052	0.849	1.039	1.36	0.827	1.233	0.985967	0.999966	0.999998	0.866349	0.927237	0.870859	0	0	0	0	0	0	244.1	232.2	282.1	197	303.9	184.7	275.5	223.4	239.4											n/a
Q14C86	GTPase-activating protein and VPS9 domain-containing protein 1 [OS=Homo sapiens]	0	10.1	3	4	4	4	1478	164.9	5.22	10.32	4	transport;other biological processes	plasma membrane;other membranes;cytosol;other cytoplasmic organelle;other cell component	enzyme regulator activity;other molecular function	Pf00616, Pf02204, Pf18151	26130	ENSG00000165219	GAPVD1	A8MYK3; B0QZ62; B0QZ63; B0QZ64; hsa:26130; Q14C76; Q14C86; Q2Q1W1; Q8ND92; Q8WU86; Q96CZ4; Q9NXQ1; Q9P207; Q9Y4N0	RAB GEFs exchange GTP for GDP on RABs; Clathrin-mediated endocytosis		2	0	0.834	0.726	0.98	1.01	1.082	0.958	0.885569	0.66828	0.998576	0.969474	0.985994	0.963668	0	0	0	0	0	0	1051.7	1251.2	907	638.4	1495.5	1544.3	1270.6
Annotated Sequence	Modifications	Contaminant	Qvality q-value	# Protein Groups	# Proteins	# PSMs	Master Protein Accessions	Positions in Master Proteins	Modifications in Master Proteins	# Missed Cleavages	Theo. MH+ [Da]	Abundance Ratio: (Hyperoxic 0-95) / (Hyperoxic 21)	Abundance Ratio: (Hyperoxic 95) / (Hyperoxic 21)	Abundance Ratio: (Hyperoxic 21) / (Hypoxic 21)	Abundance Ratio: (Hypoxic 0-21) / (Hypoxic 21)	Abundance Ratio: (Hypoxic 10) / (Hypoxic 21)	Abundance Ratio: (Hypoxic 2) / (Hypoxic 21)	Abundance Ratio Adj. P-Value: (Hyperoxic 0-95) / (Hyperoxic 21)	Abundance Ratio Adj. P-Value: (Hyperoxic 95) / (Hyperoxic 21)	Abundance Ratio Adj. P-Value: (Hyperoxic 21) / (Hypoxic 21)	Abundance Ratio Adj. P-Value: (Hypoxic 0-21) / (Hypoxic 21)	Abundance Ratio Adj. P-Value: (Hypoxic 10) / (Hypoxic 21)	Abundance Ratio Adj. P-Value: (Hypoxic 2) / (Hypoxic 21)	Abundance Ratio Variability [%]: (Hyperoxic 0-95) / (Hyperoxic 21)	Abundance Ratio Variability [%]: (Hyperoxic 95) / (Hyperoxic 21)	Abundance Ratio Variability [%]: (Hyperoxic 21) / (Hypoxic 21)	Abundance Ratio Variability [%]: (Hypoxic 0-21) / (Hypoxic 21)	Abundance Ratio Variability [%]: (Hypoxic 10) / (Hypoxic 21)	Abundance Ratio Variability [%]: (Hypoxic 2) / (Hypoxic 21)	Abundances (Grouped): Hyperoxic 0-95	Abundances (Grouped): Hyperoxic 21	Abundances (Grouped): Hyperoxic 40	Abundances (Grouped): Hyperoxic 95	Abundances (Grouped): Hypoxic 0-21	Abundances (Grouped): Hypoxic 10	Abundances (Grouped): Hypoxic 2	Abundances (Grouped): Hypoxic 21	Abundances (Grouped): SM	Abundances (Grouped) CV [%]: Hyperoxic 0-95	Abundances (Grouped) CV [%]: Hyperoxic 21	Abundances (Grouped) CV [%]: Hyperoxic 40	Abundances (Grouped) CV [%]: Hyperoxic 95	Abundances (Grouped) CV [%]: Hypoxic 0-21	Abundances (Grouped) CV [%]: Hypoxic 10	Abundances (Grouped) CV [%]: Hypoxic 2	Abundances (Grouped) CV [%]: Hypoxic 21	Abundances (Grouped) CV [%]: SM	Quan Info	Found in Sample: F5: 130N, Sample, Hyperoxic 0-95, D1
[R].ALQIPEVYLR.[E]	1xTMT6plex [N-Term]	FALSE	0.000227648	1	1	1	Q14C86	Q14C86 [1361-1370]		0	1430.86	0.66	0.301	0.741	1.158	0.789	0.823	0.93194	0.182803	0.995354	0.99995	0.908194	0.954648	0	0	0	0	0	0	311.5	472	429.6	142.1	736.9	502.2	523.6	636.6	482											n/a
[K].ILEDTQFVDGYK.[Q]	1xTMT6plex [K12]; 1xTMT6plex [N-Term]	FALSE	0.000283189	1	1	1	Q14C86	Q14C86 [76-87]		0	1886.03	1.009	2	1.166	0.881	1.001	1.021	0.99491	0.334861	0.99766	0.975443	0.999975	0.99998	0	0	0	0	0	0	151.6	150.2	92.6	300.4	113.5	129.1	131.6	128.9	132.8											n/a
[R].EAPWPSAQSEIR.[T]	1xTMT6plex [N-Term]	FALSE	0.00149686	1	1	1	Q14C86	Q14C86 [1371-1382]		0	1599.83	0.69	0.726	1.278	1.328	1.169	0.982	0.983744	0.992885	0.995354	0.927977	0.994817	0.99998	0	0	0	0	0	0	186.1	269.8	192	195.9	280.3	246.7	207.4	211.1	320.8											n/a
[K].LAFYPNQDGDILR.[D]	1xTMT6plex [N-Term]	FALSE	0.00851568	1	1	1	Q14C86	Q14C86 [1328-1340]		0	1750.93	1.12	0.01	0.824	0.837	1.528	0.935	0.970528	1.02234e-16	0.99766	0.925813	0.31961	0.99998	0	0	0	0	0	0	402.6	359.3	192.8	0	364.8	666.2	407.9	436.1	383.1											n/a
P26641	Elongation factor 1-gamma [OS=Homo sapiens]	0	64.874	27	14	45	14	437	50.1	6.67	132.55	14	protein metabolism;other metabolic processes;other biological processes	cytosol;other cell component	nucleic acid binding activity	Pf00043, Pf00647, Pf02798	1937	ENSG00000254772	EEF1G	B4DTG2; hsa:1937; P26641; Q6PJ62; Q6PK31; Q96CU2; Q9P196	Signaling by ALK fusions and activated point mutants; Eukaryotic Translation Elongation	Translation factors	3	0	0.878	0.968	0.651	0.97	1.004	1.022	0.941003	0.98913	0.7477	0.904538	0.999718	0.959899	22.53	2.15	60.71	7.98	14.6	38.09	3340.1	2892.2	2026.6	2313.6	4274.6	3895.5	3992.8
Annotated Sequence	Modifications	Contaminant	Qvality q-value	# Protein Groups	# Proteins	# PSMs	Master Protein Accessions	Positions in Master Proteins	Modifications in Master Proteins	# Missed Cleavages	Theo. MH+ [Da]	Abundance Ratio: (Hyperoxic 0-95) / (Hyperoxic 21)	Abundance Ratio: (Hyperoxic 95) / (Hyperoxic 21)	Abundance Ratio: (Hyperoxic 21) / (Hypoxic 21)	Abundance Ratio: (Hypoxic 0-21) / (Hypoxic 21)	Abundance Ratio: (Hypoxic 10) / (Hypoxic 21)	Abundance Ratio: (Hypoxic 2) / (Hypoxic 21)	Abundance Ratio Adj. P-Value: (Hyperoxic 0-95) / (Hyperoxic 21)	Abundance Ratio Adj. P-Value: (Hyperoxic 95) / (Hyperoxic 21)	Abundance Ratio Adj. P-Value: (Hyperoxic 21) / (Hypoxic 21)	Abundance Ratio Adj. P-Value: (Hypoxic 0-21) / (Hypoxic 21)	Abundance Ratio Adj. P-Value: (Hypoxic 10) / (Hypoxic 21)	Abundance Ratio Adj. P-Value: (Hypoxic 2) / (Hypoxic 21)	Abundance Ratio Variability [%]: (Hyperoxic 0-95) / (Hyperoxic 21)	Abundance Ratio Variability [%]: (Hyperoxic 95) / (Hyperoxic 21)	Abundance Ratio Variability [%]: (Hyperoxic 21) / (Hypoxic 21)	Abundance Ratio Variability [%]: (Hypoxic 0-21) / (Hypoxic 21)	Abundance Ratio Variability [%]: (Hypoxic 10) / (Hypoxic 21)	Abundance Ratio Variability [%]: (Hypoxic 2) / (Hypoxic 21)	Abundances (Grouped): Hyperoxic 0-95	Abundances (Grouped): Hyperoxic 21	Abundances (Grouped): Hyperoxic 40	Abundances (Grouped): Hyperoxic 95	Abundances (Grouped): Hypoxic 0-21	Abundances (Grouped): Hypoxic 10	Abundances (Grouped): Hypoxic 2	Abundances (Grouped): Hypoxic 21	Abundances (Grouped): SM	Abundances (Grouped) CV [%]: Hyperoxic 0-95	Abundances (Grouped) CV [%]: Hyperoxic 21	Abundances (Grouped) CV [%]: Hyperoxic 40	Abundances (Grouped) CV [%]: Hyperoxic 95	Abundances (Grouped) CV [%]: Hypoxic 0-21	Abundances (Grouped) CV [%]: Hypoxic 10	Abundances (Grouped) CV [%]: Hypoxic 2	Abundances (Grouped) CV [%]: Hypoxic 21	Abundances (Grouped) CV [%]: SM	Quan Info	Found in Sample: F5: 130N, Sample, Hyperoxic 0-95, D1
[R].EYFSWEGAFQHVGK.[A]	1xTMT6plex [K14]; 1xTMT6plex [N-Term]	FALSE	0.000148726	1	1	2	P26641	P26641 [415-428]		0	2143.1	0.228	0.114	0.753	1.109	1.21	0.801	0.0268655	0.000600287	0.995354	0.99995	0.915931	0.910653	89.84	838.31	75.33	12.26	13.79	8.02	72.1	316.6	237.2	190.1	466.5	509	337.1	420.6	418.2	123.46	91.61	87.71		49.52	50.79	31.83	38.99	32.63		High
[K].LDPGSEETQTLVR.[E]	1xTMT6plex [N-Term]	FALSE	0.000148726	1	1	3	P26641	P26641 [402-414]		0	1673.89	0.759	1.309	0.46	1.479	1.147	0.864	0.997206	0.893845	0.734574	0.759931	0.999112	0.99998	139.17	38.49	88.78	38.79	40.27	30.63	81.6	84.8	79.3	140.8	158.9	143	131.8	107.4	93.1	88.78	72.88	46.59	30.15	6.19	18.69	32.58	37.95	42.02		High
[K].KAAAPAPEEEMDECEQALAAEPK.[A]	1xOxidation [M11]; 1xMethylthio [C14]; 2xTMT6plex [K1; K23]; 1xTMT6plex [N-Term]	FALSE	0.000148726	1	1	2	P26641	P26641 [253-275]	P26641 1xMethylthio [C266]	1	3177.57																																					No Quan Values	n/a
[K].KAAAPAPEEEMDECEQALAAEPK.[A]	1xMethylthio [C14]; 2xTMT6plex [K1; K23]; 1xTMT6plex [N-Term]	FALSE	0.000148726	1	1	3	P26641	P26641 [253-275]	P26641 1xMethylthio [C266]	1	3161.58	0.298	0.548	1.01	1.331	1.022	0.919	0.553837	0.987237	0.99766	0.953448	0.999975	0.99998	0	0	0	0	0	0	27.7	93	107	50.9	122.5	94.1	84.6	92.1	130											High
[R].KLDPGSEETQTLVR.[E]	1xTMT6plex [K1]; 1xTMT6plex [N-Term]	FALSE	0.000148726	1	1	3	P26641	P26641 [401-414]		1	2031.15	0.998	0.928	1.024	1.346	1.204	0.924	0.996046	0.993624	0.99766	0.827976	0.915587	0.99998	16.64	5.79	16.67	44.58	1.74	68.7	164.1	385.3	388.9	279.9	506.7	453.1	336.7	376.3	408.8	105.14	72.87	54.94	98.69	64.63	14.64	99.33	32.61	61.1		High
[K].AAAPAPEEEMDECEQALAAEPK.[A]	1xMethylthio [C13]; 1xTMT6plex [K22]; 1xTMT6plex [N-Term]	FALSE	0.000148726	1	1	3	P26641	P26641 [254-275]	P26641 1xMethylthio [C266]	0	2804.32	1.278	0.01	1.439	0.778	0.643	1.363	0.975727	1.02234e-16	0.991227	0.741356	0.326742	0.530851	0	0	0	0	0	0	81.7	63.9	0	0	34.6	28.6	60.6	44.4	32.2											n/a
[K].ALIAAQYSGAQVR.[V]	1xTMT6plex [N-Term]	FALSE	0.000148726	1	1	7	P26641	P26641 [18-30]		0	1576.9	0.113	0.026	0.91	0.931	1.289	1.224	2.00453e-06	5.49762e-06	0.99766	0.99995	0.892413	0.908197	829.37	166.05	91.42	1.75	8.8	8.78	1029	214.9	348	55.6	220	304.7	289.2	236.3	291.4		122.79	105.78		88.21	83.98	94.07	89.21	109.23		n/a
[K].STFVLDEFKR.[K]	1xTMT6plex [K9]; 1xTMT6plex [N-Term]	FALSE	0.000227648	1	1	3	P26641	P26641 [286-295]		1	1699.98	0.877	0.817	0.703	1.041	1.105	1.05	0.998494	0.999966	0.995354	0.99995	0.999112	0.99998	13.81	16.62	81.96	10.1	8.77	41.04	310.3	268.9	7.6	361.2	527.7	448	401.7	410.9	398.4	58.84	64.03	162.56	51.11	38.48	8.03	49.53	15.05	32.99		High
[K].AAAPAPEEEMDECEQALAAEPK.[A]	1xOxidation [M10]; 1xMethylthio [C13]; 1xTMT6plex [K22]; 1xTMT6plex [N-Term]	FALSE	0.000227648	1	1	6	P26641	P26641 [254-275]	P26641 1xMethylthio [C266]	0	2820.31																																					No Quan Values	n/a
[K].STFVLDEFK.[R]	1xTMT6plex [K9]; 1xTMT6plex [N-Term]	FALSE	0.000283189	1	1	3	P26641	P26641 [286-294]		0	1543.88	1.266	1.071	0.35	1.134	1.108	1.108	0.939153	0.96179	0.565444	0.99995	0.999112	0.99998	45.25	66.25	120.79	36.57	25.07	51.7	227	172.2	166	271.5	558.3	545.4	545.5	492.4	539.6	25.6	48.75	19.2	2.53	32.38	53.69	36.59	67.32	32.44		High
[K].QATENAKEEVRR.[I]	1xTMT6plex [K7]; 1xTMT6plex [N-Term]	FALSE	0.000357242	1	1	1	P26641	P26641 [126-137]		2	1889.06	0.792	1.8	0.651	0.6	1.063	0.705	0.998494	0.680238	0.978098	0.200121	0.999112	0.568839	0	0	0	0	0	0	72.6	91.6	52.4	164.8	84.4	149.6	99.2	140.7	107.2											n/a
[K].AKDPFAHLPK.[S]	2xTMT6plex [K2; K10]; 1xTMT6plex [N-Term]	FALSE	0.000531151	1	1	2	P26641	P26641 [276-285]		1	1811.11	0.415	0.475	1.453	1.14	1.042	1.02	0.467667	0.636462	0.967669	0.99995	0.999112	0.99998	13.68	57.88	9.44	13.37	35.21	38.83	162.9	392.8	455.5	186.6	308	281.6	275.8	270.2	314.5	16.46	3.51	17.7	48.36	0.23	20.63	23.89	12.47	37.23		High
[R].QAFPNTNR.[W]	1xTMT6plex [N-Term]	FALSE	0.000599948	1	1	1	P26641	P26641 [182-189]		0	1176.63	1.049	2.917	0.26	0.974	0.772	0.979	0.996411	0.217566	0.159119	0.99995	0.865742	0.99998	0	0	0	0	0	0	85.1	81.2	87.5	236.8	304.2	240.9	305.7	312.2	252.9											High
[K].QATENAKEEVR.[R]	1xTMT6plex [K7]; 1xTMT6plex [N-Term]	FALSE	0.00067056	1	1	1	P26641	P26641 [126-136]		1	1732.96	0.583	0.57	4.027	0.936	0.939	1.022	0.802547	0.720478	0.144005	0.99995	0.999112	0.99998	0	0	0	0	0	0	420.8	722.1	563.9	411.8	167.7	168.3	183.2	179.3	236.6											High
[R].AVLGEVK.[L]	1xTMT6plex [K7]; 1xTMT6plex [N-Term]	FALSE	0.00304168	1	1	3	P26641	P26641 [202-208]		0	1173.76	1.483	0.7	0.119	0.921	0.87	1.035	0.767643	0.951397	0.00713708	0.99995	0.999112	0.99998	71.7	121.43	123.64	2.13	20.86	16.98	547.3	114.5	258.1	630.7	895.7	895.4	1090	1029.1	948.9	71.74	141.05		47.92	9.88	10.04	14.9	4.84	17.49		High
[K].FAETQPK.[K]	1xTMT6plex [K7]; 1xTMT6plex [N-Term]	FALSE	0.00566517	1	1	2	P26641	P26641 [221-227]		0	1278.75	2.282	0.102	0.393	1.242	0.878	1.032	0.138754	2.44476e-05	0.777208	0.957319	0.999112	0.99998	112.14	748.25	185.59	46.63	2.96	53.64	507.1	222.2	121.9	622	701.2	495.7	582.9	564.8	534.1	40.3	107.18	22.29		34.92	10.92	40.8	8.11	36.23		n/a
Q16853	Membrane primary amine oxidase [OS=Homo sapiens]	0.002	3.85	2	2	4	2	763	84.6	6.52	8.97	2	cell adhesion;other metabolic processes;stress response;other biological processes	plasma membrane;other membranes;ER/Golgi;other cytoplasmic organelle;other cell component	other molecular function	Pf01179, Pf02727, Pf02728	8639	ENSG00000131471	AOC3	B2RCI5; hsa:8639; K7ESB3; L0L8N9; Q16853; Q45F94	Phase I - Functionalization of compounds	Amino acid metabolism	2	0	0.539	0.127	1.038	1.168	1.136	1.224	0.152487	3.56193e-13	0.988501	0.835912	0.963396	0.168564	29.71	931.92	107.35	3.97	19.11	5.64	546.7	1058.4	238.7	948.9	1148.3	1105.5	1190.4
Annotated Sequence	Modifications	Contaminant	Qvality q-value	# Protein Groups	# Proteins	# PSMs	Master Protein Accessions	Positions in Master Proteins	Modifications in Master Proteins	# Missed Cleavages	Theo. MH+ [Da]	Abundance Ratio: (Hyperoxic 0-95) / (Hyperoxic 21)	Abundance Ratio: (Hyperoxic 95) / (Hyperoxic 21)	Abundance Ratio: (Hyperoxic 21) / (Hypoxic 21)	Abundance Ratio: (Hypoxic 0-21) / (Hypoxic 21)	Abundance Ratio: (Hypoxic 10) / (Hypoxic 21)	Abundance Ratio: (Hypoxic 2) / (Hypoxic 21)	Abundance Ratio Adj. P-Value: (Hyperoxic 0-95) / (Hyperoxic 21)	Abundance Ratio Adj. P-Value: (Hyperoxic 95) / (Hyperoxic 21)	Abundance Ratio Adj. P-Value: (Hyperoxic 21) / (Hypoxic 21)	Abundance Ratio Adj. P-Value: (Hypoxic 0-21) / (Hypoxic 21)	Abundance Ratio Adj. P-Value: (Hypoxic 10) / (Hypoxic 21)	Abundance Ratio Adj. P-Value: (Hypoxic 2) / (Hypoxic 21)	Abundance Ratio Variability [%]: (Hyperoxic 0-95) / (Hyperoxic 21)	Abundance Ratio Variability [%]: (Hyperoxic 95) / (Hyperoxic 21)	Abundance Ratio Variability [%]: (Hyperoxic 21) / (Hypoxic 21)	Abundance Ratio Variability [%]: (Hypoxic 0-21) / (Hypoxic 21)	Abundance Ratio Variability [%]: (Hypoxic 10) / (Hypoxic 21)	Abundance Ratio Variability [%]: (Hypoxic 2) / (Hypoxic 21)	Abundances (Grouped): Hyperoxic 0-95	Abundances (Grouped): Hyperoxic 21	Abundances (Grouped): Hyperoxic 40	Abundances (Grouped): Hyperoxic 95	Abundances (Grouped): Hypoxic 0-21	Abundances (Grouped): Hypoxic 10	Abundances (Grouped): Hypoxic 2	Abundances (Grouped): Hypoxic 21	Abundances (Grouped): SM	Abundances (Grouped) CV [%]: Hyperoxic 0-95	Abundances (Grouped) CV [%]: Hyperoxic 21	Abundances (Grouped) CV [%]: Hyperoxic 40	Abundances (Grouped) CV [%]: Hyperoxic 95	Abundances (Grouped) CV [%]: Hypoxic 0-21	Abundances (Grouped) CV [%]: Hypoxic 10	Abundances (Grouped) CV [%]: Hypoxic 2	Abundances (Grouped) CV [%]: Hypoxic 21	Abundances (Grouped) CV [%]: SM	Quan Info	Found in Sample: F5: 130N, Sample, Hyperoxic 0-95, D1
[R].YQLAVTQR.[K]	1xTMT6plex [N-Term]	FALSE	0.00103074	1	1	2	Q16853	Q16853 [630-637]		0	1207.7	0.622	0.094	1.031	1.111	1.14	1.234	0.908142	8.25477e-05	0.99766	0.99995	0.999112	0.726044	11.65	689.03	61	7.59	8.29	16.03	260.4	418.7	204	270.9	451	462.7	500.8	406	500.2	32.41	42.72	34.35		5.33	20.32	2.7	12.53	0.2		High
[R].GSPPPAR.[E]	1xTMT6plex [N-Term]	FALSE	0.00429452	1	2	2	Q16853	Q16853 [116-122]		0	910.531	0.467	0.17	1.045	1.229	1.132	1.214	0.329565	0.000174031	0.999998	0.966991	0.997387	0.89272	48.19	1257.54	161.65	0.36	30.04	4.74	276.8	592.6	58.8	678	697.2	642.1	688.9	567.3	592.6	76.92	103.27			1.72	30.05	6.57	2.06	5.88		High
Q16777	Histone H2A type 2-C [OS=Homo sapiens]	0	47.09	40	8	92	3	129	14	10.9	244.14	8		nucleus;other cell component	nucleic acid binding activity;other molecular function	Pf00125, Pf16211	8338	ENSG00000184260	H2AC20	hsa:8338; Q16777; Q6DRA7; Q8IUE5	HCMV Early Events; UCH proteinases; Ub-specific processing proteases; RUNX1 regulates transcription of genes involved in differentiation of HSCs; Amyloid fiber formation; Transcriptional regulation by small RNAs; B-WICH complex positively regulates rRNA expression; Formation of the beta-catenin:TCF transactivating complex; Oxidative Stress Induced Senescence; NoRC negatively regulates rRNA expres…		41	1	1.56	1.383	0.593	0.903	0.798	0.749	0.181957	0.53073	0.63272	0.655756	0.777319	0.0521467	49.46	8.9	32.39	32.94	12.15	56.73	6868.7	4409	4592.7	6252.6	5078.7	5896.1	5129
Annotated Sequence	Modifications	Contaminant	Qvality q-value	# Protein Groups	# Proteins	# PSMs	Master Protein Accessions	Positions in Master Proteins	Modifications in Master Proteins	# Missed Cleavages	Theo. MH+ [Da]	Abundance Ratio: (Hyperoxic 0-95) / (Hyperoxic 21)	Abundance Ratio: (Hyperoxic 95) / (Hyperoxic 21)	Abundance Ratio: (Hyperoxic 21) / (Hypoxic 21)	Abundance Ratio: (Hypoxic 0-21) / (Hypoxic 21)	Abundance Ratio: (Hypoxic 10) / (Hypoxic 21)	Abundance Ratio: (Hypoxic 2) / (Hypoxic 21)	Abundance Ratio Adj. P-Value: (Hyperoxic 0-95) / (Hyperoxic 21)	Abundance Ratio Adj. P-Value: (Hyperoxic 95) / (Hyperoxic 21)	Abundance Ratio Adj. P-Value: (Hyperoxic 21) / (Hypoxic 21)	Abundance Ratio Adj. P-Value: (Hypoxic 0-21) / (Hypoxic 21)	Abundance Ratio Adj. P-Value: (Hypoxic 10) / (Hypoxic 21)	Abundance Ratio Adj. P-Value: (Hypoxic 2) / (Hypoxic 21)	Abundance Ratio Variability [%]: (Hyperoxic 0-95) / (Hyperoxic 21)	Abundance Ratio Variability [%]: (Hyperoxic 95) / (Hyperoxic 21)	Abundance Ratio Variability [%]: (Hyperoxic 21) / (Hypoxic 21)	Abundance Ratio Variability [%]: (Hypoxic 0-21) / (Hypoxic 21)	Abundance Ratio Variability [%]: (Hypoxic 10) / (Hypoxic 21)	Abundance Ratio Variability [%]: (Hypoxic 2) / (Hypoxic 21)	Abundances (Grouped): Hyperoxic 0-95	Abundances (Grouped): Hyperoxic 21	Abundances (Grouped): Hyperoxic 40	Abundances (Grouped): Hyperoxic 95	Abundances (Grouped): Hypoxic 0-21	Abundances (Grouped): Hypoxic 10	Abundances (Grouped): Hypoxic 2	Abundances (Grouped): Hypoxic 21	Abundances (Grouped): SM	Abundances (Grouped) CV [%]: Hyperoxic 0-95	Abundances (Grouped) CV [%]: Hyperoxic 21	Abundances (Grouped) CV [%]: Hyperoxic 40	Abundances (Grouped) CV [%]: Hyperoxic 95	Abundances (Grouped) CV [%]: Hypoxic 0-21	Abundances (Grouped) CV [%]: Hypoxic 10	Abundances (Grouped) CV [%]: Hypoxic 2	Abundances (Grouped) CV [%]: Hypoxic 21	Abundances (Grouped) CV [%]: SM	Quan Info	Found in Sample: F5: 130N, Sample, Hyperoxic 0-95, D1
[R].NDEELNKLLGK.[V]	2xTMT6plex [K7; K11]; 1xTMT6plex [N-Term]	FALSE	0.000148726	1	7	14	Q16777	Q16777 [90-100]		1	1960.17	2.059	1.795	0.593	0.731	0.783	0.739	0.518196	0.561175	0.9518	0.708362	0.991617	0.7313	55.94	36.8	4.33	59.13	36.96	84.07	4165	2755.7	2200.5	2928.3	2392.2	3531.6	3330.2	4508.6	2441	22.88	42.17	60.99	39.13	33.53	48.58	49.57	82.88	3.58		High
[R].HLQLAIRNDEELNKLLGK.[V]	2xTMT6plex [K14; K18]; 1xTMT6plex [N-Term]	FALSE	0.000148726	1	7	6	Q16777	Q16777 [83-100]		2	2791.68	1.502	1.273	1.198	2.027	2.29	2.545	0.794293	0.855072	0.995354	0.0818795	0.00477526	7.92994e-05	86.49	31.4	44.38	58.23	118.15	5.3	751.1	376.5	460.5	479.5	846.5	584.6	335.1	255.3	243.2	74.3	39.42	47.4	77.63	64.14	54.56	45.36	53.46	27.6		High
[R].HLQLAIRNDEELNK.[L]	1xTMT6plex [K14]; 1xTMT6plex [N-Term]	FALSE	0.000148726	3	12	9	Q16777; P04908; P16104	Q16777 [83-96]; P04908 [83-96]; P16104 [83-96]		1	2151.23	1.235	1.109	1.199	1.071	1.109	0.957	0.990999	0.993438	0.99766	0.99995	0.995205	0.99998	29.22	57.22	27.6	9.22	34.85	40.61	1257	1017.5	1483.1	1105.9	1145.6	1882	1223.3	1069.9	713.7	45.43	25.23	34.7	71.09	11.03	56.17	26.65	58.99	52.74	Shared	High
[R].NDEELNKLLGK.[V]	1xDeamidated [N]; 2xTMT6plex [K7; K11]; 1xTMT6plex [N-Term]	FALSE	0.000227648	1	7	9	Q16777	Q16777 [90-100]		1	1961.15	1.62	1.788	0.255	0.859	0.694	0.735	0.802593	0.509431	0.447385	0.99741	0.854631	0.7313	25.77	141.96	21.19	33.42	40.21	81.16	1336.4	533.3	479	953.5	944.4	1139	911.6	1241	850	37.19	61.53	69.87	85.13	46.96	27.53	60.11	45.33	48.67		High
[KR].VTIAQGGVLPNIQAVLLPK.[K]	1xTMT6plex [K19]; 1xTMT6plex [N-Term]	FALSE	0.000227648	2	10	1	Q16777; P04908	Q16777 [101-119]; P04908 [101-119]		0	2389.49		100	0.01	1.026	1.491	1.19		1.02234e-16	6.41184e-16	0.99995	0.595858	0.924846		0	0	0	0	0	0	0	137.7	63.3	48.5	70.5	56.3	47.3	33.7										Shared	n/a
[R].HLQLAIRNDEELNK.[L]	1xDeamidated [Q3]; 1xTMT6plex [K14]; 1xTMT6plex [N-Term]	FALSE	0.000283189	3	12	1	Q16777; P04908; P16104	Q16777 [83-96]; P04908 [83-96]; P16104 [83-96]		1	2152.21	1.01	0.01	1.297	0.972	0.884	0.992	0.996411	1.02234e-16	0.991227	0.99995	0.999112	0.99998	0	0	0	0	0	0	396	392.3	239.4	0	294.1	267.6	300	302.5	250.7										Shared	n/a
[R].AGLQFPVGR.[VI]	1xDeamidated [Q4]; 1xTMT6plex [N-Term]	FALSE	0.000283189	4	15	8	Q16777; P04908; P0C0S5; P16104	Q16777 [22-30]; P04908 [22-30]; P0C0S5 [24-32]; P16104 [22-30]		0	1174.68	0.994	1.457	1.111	1.196	0.856	0.917	1	0.80067	0.99766	0.99949	0.997321	0.99998	30.63	39.88	99.53	48.77	25.79	27.65	284	1164	1154.8	652.4	706	296.4	985.9	430.4	626.5	103.82	73.7	78.83	104.73	60.88	83.67	52.06	65.35	69.06	Shared	High
[R].AGLQFPVGR.[VI]	1xTMT6plex [N-Term]	FALSE	0.000283189	4	15	25	Q16777; P04908; P0C0S5; P16104	Q16777 [22-30]; P04908 [22-30]; P0C0S5 [24-32]; P16104 [22-30]		0	1173.69	1.01	1.25	0.662	1.023	0.739	0.877	0.998494	0.987904	0.975408	0.99995	0.915931	0.99998	60.43	93.91	16.87	26.53	13.4	15.16	4609.5	5315.5	10570.5	7012.3	4588.3	3700.4	4345	5461.3	6956.2	80.89	105.52	86.03	98.98	67.13	88.62	48.24	71.97	68.1	Shared	High
[R].NDEELNK.[L]	1xTMT6plex [K7]; 1xTMT6plex [N-Term]	FALSE	0.00149686	3	13	10	Q16777; P04908; P16104	Q16777 [90-96]; P04908 [90-96]; P16104 [90-96]		0	1319.72	4.457	3.599	0.124	0.136	0.429	0.747	0.0055969	0.0129844	0.0582486	2.75811e-15	0.0195773	0.769572	78.58	37.07	30.31	17	69.98	5.93	2406.4	622.5	307.9	2240.6	1049	3482.1	3203.7	4287.8	2081.8	76.22	69.9	136.89	40.45	49.06	70.31	32.67	63.47	21.02	Shared	High
[R].NDEELNK.[L]	1xDeamidated [N]; 1xTMT6plex [K7]; 1xTMT6plex [N-Term]	FALSE	0.00154599	3	13	4	Q16777; P04908; P16104	Q16777 [90-96]; P04908 [90-96]; P16104 [90-96]		0	1320.7	2.848	2.835	0.111	0.18	0.488	0.735	0.0349554	0.0406523	0.0215778	1.2055e-10	0.0865382	0.569496	5.92	29.25	32.46	79.58	65.45	1.37	523.5	237.9	931.8	674.4	429.7	869.5	726.8	995.9	886.2	56.53	69.48		46.53	61.72	78.39	44.31	82.41	43.65	Shared	High
[K].KTESHK.[A]	2xTMT6plex [K1; K6]; 1xTMT6plex [N-Term]	FALSE	0.00167165	1	1	2	Q16777	Q16777 [120-125]		1	1416.88	0.993	1.304	0.776	1.363	0.928	1.264	0.998494	0.937751	0.995354	0.732666	0.999975	0.833577	24.52	29.59	16.51	54.67	13.25	57.51	1012.6	1019.4	1106.4	1329.2	1790.9	1219.1	1661.2	1313.9	887.2	58.1	37.54	71.16	62	27.91	10.11	30.34	22.55	61.55		n/a
[R].HLQLAIR.[NG]	1xTMT6plex [N-Term]	FALSE	0.00172058	4	14	3	Q16777; P04908; P0C0S5; P16104	Q16777 [83-89]; P04908 [83-89]; P0C0S5 [86-92]; P16104 [83-89]		0	1079.69	1.535	0.644	0.585	0.578	0.735	0.895	0.911422	0.983843	0.955055	0.150393	0.623449	0.99998	31.23	107.63	16.76	13.56	0.92	10.01	99.1	53.3	62.8	198.9	106.7	107.7	102.6	114.6	150.3	99.96	136.81	155.32	81.58	109.07	115.17	103.51	125.07	102.82	Shared	High
O95772	STARD3 N-terminal-like protein [OS=Homo sapiens]	0.001	4.828	9	2	2	2	234	26.6	4.81	3.03	2	cell organization and biogenesis;transport	other membranes;cytosol;other cytoplasmic organelle;other cell component	other molecular function	Pf10457	83930	ENSG00000010270	STARD3NL	A4D1X0; hsa:83930; O95772	Pregnenolone biosynthesis		1	0	0.663	0.144	1.897	1.064	1.057	1.113	0.691257	5.32557e-05	0.595131	0.969764	0.988922	0.902715	0	0	0	0	0	0	387	583.9	819.5	83.9	327.7	325.3	342.7
Annotated Sequence	Modifications	Contaminant	Qvality q-value	# Protein Groups	# Proteins	# PSMs	Master Protein Accessions	Positions in Master Proteins	Modifications in Master Proteins	# Missed Cleavages	Theo. MH+ [Da]	Abundance Ratio: (Hyperoxic 0-95) / (Hyperoxic 21)	Abundance Ratio: (Hyperoxic 95) / (Hyperoxic 21)	Abundance Ratio: (Hyperoxic 21) / (Hypoxic 21)	Abundance Ratio: (Hypoxic 0-21) / (Hypoxic 21)	Abundance Ratio: (Hypoxic 10) / (Hypoxic 21)	Abundance Ratio: (Hypoxic 2) / (Hypoxic 21)	Abundance Ratio Adj. P-Value: (Hyperoxic 0-95) / (Hyperoxic 21)	Abundance Ratio Adj. P-Value: (Hyperoxic 95) / (Hyperoxic 21)	Abundance Ratio Adj. P-Value: (Hyperoxic 21) / (Hypoxic 21)	Abundance Ratio Adj. P-Value: (Hypoxic 0-21) / (Hypoxic 21)	Abundance Ratio Adj. P-Value: (Hypoxic 10) / (Hypoxic 21)	Abundance Ratio Adj. P-Value: (Hypoxic 2) / (Hypoxic 21)	Abundance Ratio Variability [%]: (Hyperoxic 0-95) / (Hyperoxic 21)	Abundance Ratio Variability [%]: (Hyperoxic 95) / (Hyperoxic 21)	Abundance Ratio Variability [%]: (Hyperoxic 21) / (Hypoxic 21)	Abundance Ratio Variability [%]: (Hypoxic 0-21) / (Hypoxic 21)	Abundance Ratio Variability [%]: (Hypoxic 10) / (Hypoxic 21)	Abundance Ratio Variability [%]: (Hypoxic 2) / (Hypoxic 21)	Abundances (Grouped): Hyperoxic 0-95	Abundances (Grouped): Hyperoxic 21	Abundances (Grouped): Hyperoxic 40	Abundances (Grouped): Hyperoxic 95	Abundances (Grouped): Hypoxic 0-21	Abundances (Grouped): Hypoxic 10	Abundances (Grouped): Hypoxic 2	Abundances (Grouped): Hypoxic 21	Abundances (Grouped): SM	Abundances (Grouped) CV [%]: Hyperoxic 0-95	Abundances (Grouped) CV [%]: Hyperoxic 21	Abundances (Grouped) CV [%]: Hyperoxic 40	Abundances (Grouped) CV [%]: Hyperoxic 95	Abundances (Grouped) CV [%]: Hypoxic 0-21	Abundances (Grouped) CV [%]: Hypoxic 10	Abundances (Grouped) CV [%]: Hypoxic 2	Abundances (Grouped) CV [%]: Hypoxic 21	Abundances (Grouped) CV [%]: SM	Quan Info	Found in Sample: F5: 130N, Sample, Hyperoxic 0-95, D1
[R].LLIVQDASER.[A]	1xTMT6plex [N-Term]	FALSE	0.000227648	1	1	1	O95772	O95772 [186-195]		0	1372.8	0.663	0.144	1.897	1.064	1.057	1.113	0.857105	0.00172283	0.870728	0.99995	0.999112	0.993727	0	0	0	0	0	0	387	583.9	819.5	83.9	327.7	325.3	342.7	307.9	381.7											n/a
[K].VLPQEAEEENR.[L]	1xTMT6plex [N-Term]	FALSE	0.00862138	1	1	1	O95772	O95772 [175-185]		0	1542.8																																					No Quan Values	n/a
Q08AM6	Protein VAC14 homolog [OS=Homo sapiens]	0.001	7.16	4	3	7	3	782	87.9	6.13	16.33	3	other metabolic processes;signal transduction;other biological processes	other membranes;cytosol;ER/Golgi;other cytoplasmic organelle;other cell component	other molecular function	Pf11916, Pf12755	55697	ENSG00000103043	VAC14	B3KPJ5; B3KSM8; hsa:55697; Q08AM6; Q13174; Q6IA12; Q7L4Y1; Q9BW96; Q9H6V6	Synthesis of PIPs at the Golgi membrane; Synthesis of PIPs at the early endosome membrane; Synthesis of PIPs at the late endosome membrane		3	0	0.724	1.261	1.546	1.132	1.013	1.027	0.868754	0.822311	0.908292	0.972713	0.993049	0.983054	0.38	53.07	44.4	11.79	7.45	5.48	206.3	284.8	390.9	359.3	332.4	258.9	270.4
Annotated Sequence	Modifications	Contaminant	Qvality q-value	# Protein Groups	# Proteins	# PSMs	Master Protein Accessions	Positions in Master Proteins	Modifications in Master Proteins	# Missed Cleavages	Theo. MH+ [Da]	Abundance Ratio: (Hyperoxic 0-95) / (Hyperoxic 21)	Abundance Ratio: (Hyperoxic 95) / (Hyperoxic 21)	Abundance Ratio: (Hyperoxic 21) / (Hypoxic 21)	Abundance Ratio: (Hypoxic 0-21) / (Hypoxic 21)	Abundance Ratio: (Hypoxic 10) / (Hypoxic 21)	Abundance Ratio: (Hypoxic 2) / (Hypoxic 21)	Abundance Ratio Adj. P-Value: (Hyperoxic 0-95) / (Hyperoxic 21)	Abundance Ratio Adj. P-Value: (Hyperoxic 95) / (Hyperoxic 21)	Abundance Ratio Adj. P-Value: (Hyperoxic 21) / (Hypoxic 21)	Abundance Ratio Adj. P-Value: (Hypoxic 0-21) / (Hypoxic 21)	Abundance Ratio Adj. P-Value: (Hypoxic 10) / (Hypoxic 21)	Abundance Ratio Adj. P-Value: (Hypoxic 2) / (Hypoxic 21)	Abundance Ratio Variability [%]: (Hyperoxic 0-95) / (Hyperoxic 21)	Abundance Ratio Variability [%]: (Hyperoxic 95) / (Hyperoxic 21)	Abundance Ratio Variability [%]: (Hyperoxic 21) / (Hypoxic 21)	Abundance Ratio Variability [%]: (Hypoxic 0-21) / (Hypoxic 21)	Abundance Ratio Variability [%]: (Hypoxic 10) / (Hypoxic 21)	Abundance Ratio Variability [%]: (Hypoxic 2) / (Hypoxic 21)	Abundances (Grouped): Hyperoxic 0-95	Abundances (Grouped): Hyperoxic 21	Abundances (Grouped): Hyperoxic 40	Abundances (Grouped): Hyperoxic 95	Abundances (Grouped): Hypoxic 0-21	Abundances (Grouped): Hypoxic 10	Abundances (Grouped): Hypoxic 2	Abundances (Grouped): Hypoxic 21	Abundances (Grouped): SM	Abundances (Grouped) CV [%]: Hyperoxic 0-95	Abundances (Grouped) CV [%]: Hyperoxic 21	Abundances (Grouped) CV [%]: Hyperoxic 40	Abundances (Grouped) CV [%]: Hyperoxic 95	Abundances (Grouped) CV [%]: Hypoxic 0-21	Abundances (Grouped) CV [%]: Hypoxic 10	Abundances (Grouped) CV [%]: Hypoxic 2	Abundances (Grouped) CV [%]: Hypoxic 21	Abundances (Grouped) CV [%]: SM	Quan Info	Found in Sample: F5: 130N, Sample, Hyperoxic 0-95, D1
[K].LAADPDPNVK.[S]	1xTMT6plex [K10]; 1xTMT6plex [N-Term]	FALSE	0.000283189	1	1	3	Q08AM6	Q08AM6 [142-151]		0	1497.87	0.791	1.005	1.326	1.118	1.021	0.814	0.99658	0.981624	0.995354	0.99995	0.999975	0.946611	13.19	33.94	47.11	1.83	1.13	34.89	233.6	295.2	361.2	296.8	249	227.2	181.1	222.6	246.7	17.54	5.06	61.51	26.71	39.79	37.18	66.47	38.18	63.06		High
[K].LVTPEDDELDELRPGQR.[Q]	1xTMT6plex [N-Term]	FALSE	0.000531151	1	1	3	Q08AM6	Q08AM6 [331-347]		0	2211.15	0.677	1.581	1.627	1.059	0.916	1.262	0.988748	0.742907	0.983352	0.99995	0.999112	0.793856	9.66	104.75	31.46	36.68	22.17	25.29	80.5	118.9	90.6	188	77.4	67	92.3	73.1	41.9	16.23	25.23	75.38	62.84	79.5	33.58	71.92	52.64	57.49		n/a
[K].VAALEIEK.[L]	1xTMT6plex [K8]; 1xTMT6plex [N-Term]	FALSE	0.00783857	1	1	1	Q08AM6	Q08AM6 [28-35]		0	1330.83																																					No Quan Values	n/a
P31944	Caspase-14 [OS=Homo sapiens]	0	17.593	20	6	12	6	242	27.7	5.58	32.79	6	protein metabolism;other biological processes	plasma membrane;cytosol;cytoskeleton;mitochondrion;nucleus;other cell component	other molecular function	Pf00656	23581	ENSG00000105141	CASP14	hsa:23581; O95823; P31944; Q3SYC9	Formation of the cornified envelope	Vitamin D receptor pathway	2	0	0.724	1.524	1.92	1.077	0.95	1.379	0.849964	0.579925	0.689473	0.996249	0.986776	0.314158	101.44	30.39	175.26	58.44	15.4	83.79	309.4	401.6	453.5	614	230.1	184.7	248.8
Annotated Sequence	Modifications	Contaminant	Qvality q-value	# Protein Groups	# Proteins	# PSMs	Master Protein Accessions	Positions in Master Proteins	Modifications in Master Proteins	# Missed Cleavages	Theo. MH+ [Da]	Abundance Ratio: (Hyperoxic 0-95) / (Hyperoxic 21)	Abundance Ratio: (Hyperoxic 95) / (Hyperoxic 21)	Abundance Ratio: (Hyperoxic 21) / (Hypoxic 21)	Abundance Ratio: (Hypoxic 0-21) / (Hypoxic 21)	Abundance Ratio: (Hypoxic 10) / (Hypoxic 21)	Abundance Ratio: (Hypoxic 2) / (Hypoxic 21)	Abundance Ratio Adj. P-Value: (Hyperoxic 0-95) / (Hyperoxic 21)	Abundance Ratio Adj. P-Value: (Hyperoxic 95) / (Hyperoxic 21)	Abundance Ratio Adj. P-Value: (Hyperoxic 21) / (Hypoxic 21)	Abundance Ratio Adj. P-Value: (Hypoxic 0-21) / (Hypoxic 21)	Abundance Ratio Adj. P-Value: (Hypoxic 10) / (Hypoxic 21)	Abundance Ratio Adj. P-Value: (Hypoxic 2) / (Hypoxic 21)	Abundance Ratio Variability [%]: (Hyperoxic 0-95) / (Hyperoxic 21)	Abundance Ratio Variability [%]: (Hyperoxic 95) / (Hyperoxic 21)	Abundance Ratio Variability [%]: (Hyperoxic 21) / (Hypoxic 21)	Abundance Ratio Variability [%]: (Hypoxic 0-21) / (Hypoxic 21)	Abundance Ratio Variability [%]: (Hypoxic 10) / (Hypoxic 21)	Abundance Ratio Variability [%]: (Hypoxic 2) / (Hypoxic 21)	Abundances (Grouped): Hyperoxic 0-95	Abundances (Grouped): Hyperoxic 21	Abundances (Grouped): Hyperoxic 40	Abundances (Grouped): Hyperoxic 95	Abundances (Grouped): Hypoxic 0-21	Abundances (Grouped): Hypoxic 10	Abundances (Grouped): Hypoxic 2	Abundances (Grouped): Hypoxic 21	Abundances (Grouped): SM	Abundances (Grouped) CV [%]: Hyperoxic 0-95	Abundances (Grouped) CV [%]: Hyperoxic 21	Abundances (Grouped) CV [%]: Hyperoxic 40	Abundances (Grouped) CV [%]: Hyperoxic 95	Abundances (Grouped) CV [%]: Hypoxic 0-21	Abundances (Grouped) CV [%]: Hypoxic 10	Abundances (Grouped) CV [%]: Hypoxic 2	Abundances (Grouped) CV [%]: Hypoxic 21	Abundances (Grouped) CV [%]: SM	Quan Info	Found in Sample: F5: 130N, Sample, Hyperoxic 0-95, D1
[R].EGSEEDLDALEHMFR.[Q]	1xOxidation [M13]; 1xTMT6plex [N-Term]	FALSE	0.000148726	1	1	4	P31944	P31944 [30-44]		0	2022.93	1.037	1.928	1.92	1.735	1.083	1.504	0.985629	0.431968	0.914495	0.389081	0.999112	0.387634	173.92	4.63	175.26	13.72	3.99	69.27	167.5	161.5	288.2	311.3	145.9	91.1	126.5	84.1	87.9	126.75	60.16	129.16	63.73	129.26	127.64	108.12	126.91	71.18		n/a
[R].KTNPEIQSTLR.[K]	1xTMT6plex [K1]; 1xTMT6plex [N-Term]	FALSE	0.000227648	1	1	3	P31944	P31944 [226-236]		1	1745.03	1.285	1.059	0.984	0.733	0.857	0.804	0.983744	0.999966	0.999998	0.71282	0.999112	0.86711	0	0	0	0	0	0	1236.2	961.7	1081.5	1018	716.2	837.2	786.1	977.2	481											n/a
[K].RDPTAEQFQEELEK.[F]	1xTMT6plex [K14]; 1xTMT6plex [N-Term]	FALSE	0.000227648	1	1	1	P31944	P31944 [54-67]		1	2178.14																																					No Quan Values	n/a
[R].DPTAEQFQEELEK.[F]	1xTMT6plex [K13]; 1xTMT6plex [N-Term]	FALSE	0.000964462	1	1	1	P31944	P31944 [55-67]		0	2022.04																																					No Quan Values	n/a
[K].TNPEIQSTLR.[K]	1xTMT6plex [N-Term]	FALSE	0.00272087	1	1	2	P31944	P31944 [227-236]		0	1387.77																																					No Quan Values	n/a
[K].FQQAIDSR.[E]	1xTMT6plex [N-Term]	FALSE	0.00310936	1	1	1	P31944	P31944 [68-75]		0	1193.65	1.373	1.243	0.461	0.396	0.535	0.267	0.840868	0.886229	0.795124	0.00414135	0.0552875	1.51167e-09	0	0	0	0	0	0	490.4	357.1	917	444	306.6	414.1	207.1	774.5	417.5											n/a
Q9UNN8	Endothelial protein C receptor [OS=Homo sapiens]	0	7.948	13	3	8	3	238	26.7	7.18	27.98	3	stress response;other biological processes	non-structural extracellular;plasma membrane;other membranes;cytoskeleton;other cell component	other molecular function	Pf16497	10544	ENSG00000101000	PROCR	B2RC04; hsa:10544; Q14218; Q6IB56; Q96CB3; Q9ULX1; Q9UNN8	Cell surface interactions at the vascular wall; Common Pathway of Fibrin Clot Formation		2	0	0.751	0.477	1.044	0.695	1.05	0.803	0.9333	0.647886	0.997936	0.0665138	0.988922	0.631672	92.64	123.05	83.18	34.5	19.73	60.4	135.2	139	34.3	110.9	191.4	308.9	272.4
Annotated Sequence	Modifications	Contaminant	Qvality q-value	# Protein Groups	# Proteins	# PSMs	Master Protein Accessions	Positions in Master Proteins	Modifications in Master Proteins	# Missed Cleavages	Theo. MH+ [Da]	Abundance Ratio: (Hyperoxic 0-95) / (Hyperoxic 21)	Abundance Ratio: (Hyperoxic 95) / (Hyperoxic 21)	Abundance Ratio: (Hyperoxic 21) / (Hypoxic 21)	Abundance Ratio: (Hypoxic 0-21) / (Hypoxic 21)	Abundance Ratio: (Hypoxic 10) / (Hypoxic 21)	Abundance Ratio: (Hypoxic 2) / (Hypoxic 21)	Abundance Ratio Adj. P-Value: (Hyperoxic 0-95) / (Hyperoxic 21)	Abundance Ratio Adj. P-Value: (Hyperoxic 95) / (Hyperoxic 21)	Abundance Ratio Adj. P-Value: (Hyperoxic 21) / (Hypoxic 21)	Abundance Ratio Adj. P-Value: (Hypoxic 0-21) / (Hypoxic 21)	Abundance Ratio Adj. P-Value: (Hypoxic 10) / (Hypoxic 21)	Abundance Ratio Adj. P-Value: (Hypoxic 2) / (Hypoxic 21)	Abundance Ratio Variability [%]: (Hyperoxic 0-95) / (Hyperoxic 21)	Abundance Ratio Variability [%]: (Hyperoxic 95) / (Hyperoxic 21)	Abundance Ratio Variability [%]: (Hyperoxic 21) / (Hypoxic 21)	Abundance Ratio Variability [%]: (Hypoxic 0-21) / (Hypoxic 21)	Abundance Ratio Variability [%]: (Hypoxic 10) / (Hypoxic 21)	Abundance Ratio Variability [%]: (Hypoxic 2) / (Hypoxic 21)	Abundances (Grouped): Hyperoxic 0-95	Abundances (Grouped): Hyperoxic 21	Abundances (Grouped): Hyperoxic 40	Abundances (Grouped): Hyperoxic 95	Abundances (Grouped): Hypoxic 0-21	Abundances (Grouped): Hypoxic 10	Abundances (Grouped): Hypoxic 2	Abundances (Grouped): Hypoxic 21	Abundances (Grouped): SM	Abundances (Grouped) CV [%]: Hyperoxic 0-95	Abundances (Grouped) CV [%]: Hyperoxic 21	Abundances (Grouped) CV [%]: Hyperoxic 40	Abundances (Grouped) CV [%]: Hyperoxic 95	Abundances (Grouped) CV [%]: Hypoxic 0-21	Abundances (Grouped) CV [%]: Hypoxic 10	Abundances (Grouped) CV [%]: Hypoxic 2	Abundances (Grouped) CV [%]: Hypoxic 21	Abundances (Grouped) CV [%]: SM	Quan Info	Found in Sample: F5: 130N, Sample, Hyperoxic 0-95, D1
[R].EFLEDTCVQYVQK.[H]	1xMethylthio [C7]; 1xTMT6plex [K13]; 1xTMT6plex [N-Term]	FALSE	0.000148726	1	1	5	Q9UNN8	Q9UNN8 [180-192]	Q9UNN8 1xMethylthio [C186]	0	2106.07	0.751	0.477	1.044	0.695	0.91	0.803	0.997395	0.887728	0.999998	0.495903	0.999112	0.939009	92.64	123.05	83.18	34.5	21.7	56.66	135.2	139	23.7	110.9	191.4	255.9	272.4	322.2	385	22.09	80.39		66.86	80.37	40.59	78.91	57.04	23.11		High
[R].LHMLQISYFR.[D]	1xTMT6plex [N-Term]	FALSE	0.00067056	1	1	2	Q9UNN8	Q9UNN8 [28-37]		0	1536.86																																					No Quan Values	n/a
[K].HISAENTK.[G]	1xTMT6plex [K8]; 1xTMT6plex [N-Term]	FALSE	0.00862138	1	1	1	Q9UNN8	Q9UNN8 [193-200]		0	1357.78	0.01	0.01	0.539	0.964	1.388	1.412	3.23126e-16	1.02234e-16	0.984809	0.99995	0.838859	0.449999	0	0	0	0	0	0	0	25.5	10.6	0	45.7	65.8	66.9	47.4	33.7											n/a
P10644	cAMP-dependent protein kinase type I-alpha regulatory subunit [OS=Homo sapiens]	0	15.274	13	5	8	5	381	43	5.35	24.91	5	cell cycle OR cell proliferation;cell organization and biogenesis;developmental processes;signal transduction;other biological processes	plasma membrane;other membranes;cytosol;cytoskeleton;other cytoplasmic organelle;other cell component	other molecular function	Pf00027, Pf02197	5573	ENSG00000108946	PRKAR1A	hsa:5573; K7ER48; P10644; Q567S7	ALK mutants bind TKIs; Signaling by ALK fusions and activated point mutants; Hedgehog 'off' state; FCGR3A-mediated IL10 synthesis; GPER1 signaling; ADORA2B mediated anti-inflammatory cytokines production; Factors involved in megakaryocyte development and platelet production; Glucagon-like Peptide-1 (GLP1) regulates insulin secretion; Vasopressin regulates renal water homeostasis via Aquaporins; P…	Mesodermal commitment pathway; Myometrial relaxation and contraction pathways; Mesodermal commitment pathway; G protein signaling pathways; Cannabinoid receptor signaling; Lipid metabolism pathway; Hippo signaling regulation pathways; Hippo-Merlin signaling dysregulation; Fragile X syndrome; Calcium regulation in cardiac cells; Sudden infant death syndrome (SIDS) susceptibility pathways	24	0	0.921	0.779	1.48	1.03	1.01	0.989	0.979722	0.9447	0.925909	0.939058	0.994491	0.98707	32.92	87.75	11.3	13.56	9.84	21.93	295.3	330.6	412.1	290	399.2	242.3	401.4
Annotated Sequence	Modifications	Contaminant	Qvality q-value	# Protein Groups	# Proteins	# PSMs	Master Protein Accessions	Positions in Master Proteins	Modifications in Master Proteins	# Missed Cleavages	Theo. MH+ [Da]	Abundance Ratio: (Hyperoxic 0-95) / (Hyperoxic 21)	Abundance Ratio: (Hyperoxic 95) / (Hyperoxic 21)	Abundance Ratio: (Hyperoxic 21) / (Hypoxic 21)	Abundance Ratio: (Hypoxic 0-21) / (Hypoxic 21)	Abundance Ratio: (Hypoxic 10) / (Hypoxic 21)	Abundance Ratio: (Hypoxic 2) / (Hypoxic 21)	Abundance Ratio Adj. P-Value: (Hyperoxic 0-95) / (Hyperoxic 21)	Abundance Ratio Adj. P-Value: (Hyperoxic 95) / (Hyperoxic 21)	Abundance Ratio Adj. P-Value: (Hyperoxic 21) / (Hypoxic 21)	Abundance Ratio Adj. P-Value: (Hypoxic 0-21) / (Hypoxic 21)	Abundance Ratio Adj. P-Value: (Hypoxic 10) / (Hypoxic 21)	Abundance Ratio Adj. P-Value: (Hypoxic 2) / (Hypoxic 21)	Abundance Ratio Variability [%]: (Hyperoxic 0-95) / (Hyperoxic 21)	Abundance Ratio Variability [%]: (Hyperoxic 95) / (Hyperoxic 21)	Abundance Ratio Variability [%]: (Hyperoxic 21) / (Hypoxic 21)	Abundance Ratio Variability [%]: (Hypoxic 0-21) / (Hypoxic 21)	Abundance Ratio Variability [%]: (Hypoxic 10) / (Hypoxic 21)	Abundance Ratio Variability [%]: (Hypoxic 2) / (Hypoxic 21)	Abundances (Grouped): Hyperoxic 0-95	Abundances (Grouped): Hyperoxic 21	Abundances (Grouped): Hyperoxic 40	Abundances (Grouped): Hyperoxic 95	Abundances (Grouped): Hypoxic 0-21	Abundances (Grouped): Hypoxic 10	Abundances (Grouped): Hypoxic 2	Abundances (Grouped): Hypoxic 21	Abundances (Grouped): SM	Abundances (Grouped) CV [%]: Hyperoxic 0-95	Abundances (Grouped) CV [%]: Hyperoxic 21	Abundances (Grouped) CV [%]: Hyperoxic 40	Abundances (Grouped) CV [%]: Hyperoxic 95	Abundances (Grouped) CV [%]: Hypoxic 0-21	Abundances (Grouped) CV [%]: Hypoxic 10	Abundances (Grouped) CV [%]: Hypoxic 2	Abundances (Grouped) CV [%]: Hypoxic 21	Abundances (Grouped) CV [%]: SM	Quan Info	Found in Sample: F5: 130N, Sample, Hyperoxic 0-95, D1
[R].LTVADALEPVQFEDGQK.[I]	1xTMT6plex [K17]; 1xTMT6plex [N-Term]	FALSE	0.000148726	1	1	3	P10644	P10644 [265-281]		0	2318.26	1.111	1.018	0.996	0.88	0.899	0.814	0.974275	0.994912	0.999221	0.965904	0.999112	0.938339	58.96	118.66	4.13	9.21	7.08	8.32	182.7	164.4	224.9	167.4	145.2	148.5	134.5	165.1	162.9	1.84	50.66	31.24	48.58	39.24	41.1	40.02	47.19	43.32		High
[R].SENEEFVEVGR.[L]	1xTMT6plex [N-Term]	FALSE	0.000148726	1	1	2	P10644	P10644 [307-317]		0	1523.75	0.836	2.21	1.535	1.543	1.083	1.519	1	0.42031	0.9948	0.630413	0.999112	0.331835	14.38	96.63	5.44	34.25	4.27	65.59	92.9	111.2	174.2	245.7	111.7	78.4	110	72.4	63	40.04	27.12	28.89	55.95	60.81	35.93	81.8	32.09	30.62		n/a
[R].RSENEEFVEVGR.[L]	1xTMT6plex [N-Term]	FALSE	0.000283189	1	1	1	P10644	P10644 [306-317]		1	1679.86	1.335	0.779	1.361	2.862	1.204	2.706	0.951859	0.999966	0.995354	0.00306526	0.999112	0.000200477	0	0	0	0	0	0	99.9	74.9	105	58.3	157.4	66.2	148.9	55	105.3											n/a
[K].QIQNLQK.[A]	1xTMT6plex [K7]; 1xTMT6plex [N-Term]	FALSE	0.001926	1	1	1	P10644	P10644 [64-70]		0	1329.83	0.542	0.265	1.66	1.03	1.01	1.052	0.794293	0.0882192	0.967669	0.99995	0.999975	0.99998	0	0	0	0	0	0	181.7	335.1	264.9	88.8	208	204	212.5	201.9	211.6											n/a
[R].NIQQYNSFVSLSV.[-]	1xTMT6plex [N-Term]	FALSE	0.00379428	1	1	1	P10644	P10644 [369-381]		0	1727.92	0.588	0.58	1.857	0.998	1.143	0.612	0.964772	0.974249	0.955055	0.99995	0.999112	0.233923	0	0	0	0	0	0	71	120.7	92.8	70	64.9	74.4	39.8	65	147.1											n/a
Q9UBS4	DnaJ homolog subfamily B member 11 [OS=Homo sapiens]	0.002	4.198	11	2	2	2	358	40.5	6.18	2.32	2	protein metabolism;RNA metabolism OR transcription;other metabolic processes;other biological processes	non-structural extracellular;ER/Golgi;nucleus;other cell component	signal transduction activity or receptor binding;other molecular function	Pf00226, Pf01556	51726	ENSG00000090520	DNAJB11	hsa:51726; Q542Y5; Q542Y9; Q6IAQ8; Q96JC6; Q9UBS4	XBP1(S) activates chaperone genes	Photodynamic therapy-induced unfolded protein response	2	0	0.488	1.037	1.268	1.498	1.054	1.213	0.682754	0.984049	0.988299	0.5451	0.988922	0.759272	0	0	0	0	0	0	46.6	95.6	4.7	99.1	112.9	79.5	91.4
Annotated Sequence	Modifications	Contaminant	Qvality q-value	# Protein Groups	# Proteins	# PSMs	Master Protein Accessions	Positions in Master Proteins	Modifications in Master Proteins	# Missed Cleavages	Theo. MH+ [Da]	Abundance Ratio: (Hyperoxic 0-95) / (Hyperoxic 21)	Abundance Ratio: (Hyperoxic 95) / (Hyperoxic 21)	Abundance Ratio: (Hyperoxic 21) / (Hypoxic 21)	Abundance Ratio: (Hypoxic 0-21) / (Hypoxic 21)	Abundance Ratio: (Hypoxic 10) / (Hypoxic 21)	Abundance Ratio: (Hypoxic 2) / (Hypoxic 21)	Abundance Ratio Adj. P-Value: (Hyperoxic 0-95) / (Hyperoxic 21)	Abundance Ratio Adj. P-Value: (Hyperoxic 95) / (Hyperoxic 21)	Abundance Ratio Adj. P-Value: (Hyperoxic 21) / (Hypoxic 21)	Abundance Ratio Adj. P-Value: (Hypoxic 0-21) / (Hypoxic 21)	Abundance Ratio Adj. P-Value: (Hypoxic 10) / (Hypoxic 21)	Abundance Ratio Adj. P-Value: (Hypoxic 2) / (Hypoxic 21)	Abundance Ratio Variability [%]: (Hyperoxic 0-95) / (Hyperoxic 21)	Abundance Ratio Variability [%]: (Hyperoxic 95) / (Hyperoxic 21)	Abundance Ratio Variability [%]: (Hyperoxic 21) / (Hypoxic 21)	Abundance Ratio Variability [%]: (Hypoxic 0-21) / (Hypoxic 21)	Abundance Ratio Variability [%]: (Hypoxic 10) / (Hypoxic 21)	Abundance Ratio Variability [%]: (Hypoxic 2) / (Hypoxic 21)	Abundances (Grouped): Hyperoxic 0-95	Abundances (Grouped): Hyperoxic 21	Abundances (Grouped): Hyperoxic 40	Abundances (Grouped): Hyperoxic 95	Abundances (Grouped): Hypoxic 0-21	Abundances (Grouped): Hypoxic 10	Abundances (Grouped): Hypoxic 2	Abundances (Grouped): Hypoxic 21	Abundances (Grouped): SM	Abundances (Grouped) CV [%]: Hyperoxic 0-95	Abundances (Grouped) CV [%]: Hyperoxic 21	Abundances (Grouped) CV [%]: Hyperoxic 40	Abundances (Grouped) CV [%]: Hyperoxic 95	Abundances (Grouped) CV [%]: Hypoxic 0-21	Abundances (Grouped) CV [%]: Hypoxic 10	Abundances (Grouped) CV [%]: Hypoxic 2	Abundances (Grouped) CV [%]: Hypoxic 21	Abundances (Grouped) CV [%]: SM	Quan Info	Found in Sample: F5: 130N, Sample, Hyperoxic 0-95, D1
[R].DGMEYPFIGEGEPHVDGEPGDLR.[F]	1xOxidation [M3]; 1xTMT6plex [N-Term]	FALSE	0.000964462	1	1	1	Q9UBS4	Q9UBS4 [218-240]		0	2761.26																																					No Quan Values	n/a
[K].FQDLGAAYEVLSDSEKR.[K]	1xTMT6plex [K16]; 1xTMT6plex [N-Term]	FALSE	0.00232759	1	1	1	Q9UBS4	Q9UBS4 [67-83]		1	2386.27	0.488	1.037	1.268	1.498	1.054	1.213	0.868857	0.98305	0.995354	0.703612	0.999975	0.878097	0	0	0	0	0	0	46.6	95.6	4.7	99.1	112.9	79.5	91.4	75.4	97.4											n/a
P61026	Ras-related protein Rab-10 [OS=Homo sapiens]	0	12.537	26	6	11	3	200	22.5	8.38	26.43	6	cell cycle OR cell proliferation;cell organization and biogenesis;transport;developmental processes;other biological processes	plasma membrane;other membranes;cytosol;cytoskeleton;ER/Golgi;other cytoplasmic organelle;other cell component	cytoskeletal activity;other molecular function	Pf00071	10890	ENSG00000084733	RAB10	D6W538; hsa:10890; O88386; P61026; Q6IA52; Q9D7X6; Q9H0T3	Neutrophil degranulation; Translocation of SLC2A4 (GLUT4) to the plasma membrane; RAB GEFs exchange GTP for GDP on RABs; RAB geranylgeranylation	Focal adhesion: PI3K-Akt-mTOR-signaling pathway	5	1	1.054	0.803	0.824	0.829	0.675	0.824	0.922257	0.766024	0.957042	0.29985	0.18087	0.360828	15.19	36.03	7.46	58.51	40.61	15.65	1385	1482.9	1480.8	1140.3	1226.2	1021.7	1273
Annotated Sequence	Modifications	Contaminant	Qvality q-value	# Protein Groups	# Proteins	# PSMs	Master Protein Accessions	Positions in Master Proteins	Modifications in Master Proteins	# Missed Cleavages	Theo. MH+ [Da]	Abundance Ratio: (Hyperoxic 0-95) / (Hyperoxic 21)	Abundance Ratio: (Hyperoxic 95) / (Hyperoxic 21)	Abundance Ratio: (Hyperoxic 21) / (Hypoxic 21)	Abundance Ratio: (Hypoxic 0-21) / (Hypoxic 21)	Abundance Ratio: (Hypoxic 10) / (Hypoxic 21)	Abundance Ratio: (Hypoxic 2) / (Hypoxic 21)	Abundance Ratio Adj. P-Value: (Hyperoxic 0-95) / (Hyperoxic 21)	Abundance Ratio Adj. P-Value: (Hyperoxic 95) / (Hyperoxic 21)	Abundance Ratio Adj. P-Value: (Hyperoxic 21) / (Hypoxic 21)	Abundance Ratio Adj. P-Value: (Hypoxic 0-21) / (Hypoxic 21)	Abundance Ratio Adj. P-Value: (Hypoxic 10) / (Hypoxic 21)	Abundance Ratio Adj. P-Value: (Hypoxic 2) / (Hypoxic 21)	Abundance Ratio Variability [%]: (Hyperoxic 0-95) / (Hyperoxic 21)	Abundance Ratio Variability [%]: (Hyperoxic 95) / (Hyperoxic 21)	Abundance Ratio Variability [%]: (Hyperoxic 21) / (Hypoxic 21)	Abundance Ratio Variability [%]: (Hypoxic 0-21) / (Hypoxic 21)	Abundance Ratio Variability [%]: (Hypoxic 10) / (Hypoxic 21)	Abundance Ratio Variability [%]: (Hypoxic 2) / (Hypoxic 21)	Abundances (Grouped): Hyperoxic 0-95	Abundances (Grouped): Hyperoxic 21	Abundances (Grouped): Hyperoxic 40	Abundances (Grouped): Hyperoxic 95	Abundances (Grouped): Hypoxic 0-21	Abundances (Grouped): Hypoxic 10	Abundances (Grouped): Hypoxic 2	Abundances (Grouped): Hypoxic 21	Abundances (Grouped): SM	Abundances (Grouped) CV [%]: Hyperoxic 0-95	Abundances (Grouped) CV [%]: Hyperoxic 21	Abundances (Grouped) CV [%]: Hyperoxic 40	Abundances (Grouped) CV [%]: Hyperoxic 95	Abundances (Grouped) CV [%]: Hypoxic 0-21	Abundances (Grouped) CV [%]: Hypoxic 10	Abundances (Grouped) CV [%]: Hypoxic 2	Abundances (Grouped) CV [%]: Hypoxic 21	Abundances (Grouped) CV [%]: SM	Quan Info	Found in Sample: F5: 130N, Sample, Hyperoxic 0-95, D1
[KR].LLIIGDSGVGK.[TS]	1xTMT6plex [K11]; 1xTMT6plex [N-Term]	FALSE	0.00103074	7	9	2	P61026; P62820; P61006; P51153; Q9H0U4; Q15286; Q92930	P61026 [12-22]; P62820 [14-24]; P61006 [11-21]; P51153 [11-21]; Q9H0U4 [11-21]; Q15286 [11-21]; Q92930 [11-21]		0	1529.97	1.077	0.01	0.775	1.265	0.822	0.603	0.996046	1.02234e-16	0.995354	0.991246	0.924696	0.162211	0	0	0	0	0	0	74	68.7	35.1	0	112.2	72.9	53.5	88.7	69.6										Shared	n/a
[K].ANINIEK.[A]	1xTMT6plex [K7]; 1xTMT6plex [N-Term]	FALSE	0.0014373	1	1	5	P61026	P61026 [155-161]		0	1259.77	1.019	0.098	0.975	0.836	0.725	0.989	0.998494	1.69222e-06	0.999998	0.974982	0.695626	0.99998	20.25	720	21.09	39.23	29.61	13.35	680.9	668.3	495.6	559.8	572.8	497	677.9	685.3	723.7	38.05	19.63	5.89		70.05	63.1	26.77	38.79	51.69		High
[K].TVELQGK.[K]	1xTMT6plex [K7]; 1xTMT6plex [N-Term]	FALSE	0.00245342	1	1	1	P61026	P61026 [50-56]		0	1232.76	1.018	1.085	0.546	0.494	0.446	0.509	0.979403	0.947173	0.91604	0.020672	0.00599256	0.0176	0	0	0	0	0	0	296.7	291.4	420.3	316.1	263.7	237.7	271.4	533.5	241.6											n/a
[KR].IQIWDTAGQER.[FY]	1xTMT6plex [N-Term]	FALSE	0.00292314	8	24	8	P61026; P62820; P61106; P61006; Q9H0U4; Q15286; P20340; Q92930	P61026 [60-70]; P62820 [62-72]; P61106 [62-72]; P61006 [59-69]; Q9H0U4 [59-69]; Q15286 [59-69]; P20340 [64-74]; Q92930 [59-69]		0	1545.82	0.661	0.861	1.163	1.209	0.876	1.739	0.958101	0.999966	0.995354	0.99612	0.999112	0.0259759	0	0	0	0	0	0	239.4	362.1	308.8	311.7	376.6	272.8	541.6	311.4	329.4										Shared	n/a
[K].GKGEQIAR.[E]	1xTMT6plex [K2]; 1xTMT6plex [N-Term]	FALSE	0.00379428	1	1	1	P61026	P61026 [135-142]		1	1316.81	0.65	1.049	2.059	1.332	0.867	0.96	0.719468	0.999966	0.870728	0.827449	0.999112	0.99998	0	0	0	0	0	0	795.3	1223.5	1439.5	1283.8	791.8	515.2	570.4	594.2	555.3											n/a
[R].FFETSAK.[AS]	1xTMT6plex [K7]; 1xTMT6plex [N-Term]	FALSE	0.00526627	2	2	1	P61026; P51153	P61026 [148-154]; P51153 [147-153]		0	1287.73	1.26	0.38	0.866	1.218	0.978	0.916	0.951859	0.232229	0.995354	0.978312	0.999975	0.99998	0	0	0	0	0	0	665.7	528.3	492.1	200.9	742.9	596.5	558.5	609.8	580.8										Shared	n/a
P61758	Prefoldin subunit 3 [OS=Homo sapiens]	0	19.388	31	9	20	9	197	22.6	7.11	44.77	9	cell organization and biogenesis;other biological processes	cytosol;nucleus;other cell component	cytoskeletal activity;other molecular function	Pf02996	7411	ENSG00000155959	VBP1	B2R8L5; B4DWR3; F5H2A7; hsa:7411; O55228; P61758; Q15765; Q5JT81; Q86X96	Prefoldin mediated transfer of substrate to CCT/TriC	Cellular proteostasis	2	0	0.746	0.813	0.651	1.12	1.062	1.048	0.694382	0.789742	0.7477	0.867349	0.986314	0.902715	51.19	18.03	70.08	8.94	12.86	36.58	1155.6	1535	2021.4	1151.8	5004	4128.4	3224.9
Annotated Sequence	Modifications	Contaminant	Qvality q-value	# Protein Groups	# Proteins	# PSMs	Master Protein Accessions	Positions in Master Proteins	Modifications in Master Proteins	# Missed Cleavages	Theo. MH+ [Da]	Abundance Ratio: (Hyperoxic 0-95) / (Hyperoxic 21)	Abundance Ratio: (Hyperoxic 95) / (Hyperoxic 21)	Abundance Ratio: (Hyperoxic 21) / (Hypoxic 21)	Abundance Ratio: (Hypoxic 0-21) / (Hypoxic 21)	Abundance Ratio: (Hypoxic 10) / (Hypoxic 21)	Abundance Ratio: (Hypoxic 2) / (Hypoxic 21)	Abundance Ratio Adj. P-Value: (Hyperoxic 0-95) / (Hyperoxic 21)	Abundance Ratio Adj. P-Value: (Hyperoxic 95) / (Hyperoxic 21)	Abundance Ratio Adj. P-Value: (Hyperoxic 21) / (Hypoxic 21)	Abundance Ratio Adj. P-Value: (Hypoxic 0-21) / (Hypoxic 21)	Abundance Ratio Adj. P-Value: (Hypoxic 10) / (Hypoxic 21)	Abundance Ratio Adj. P-Value: (Hypoxic 2) / (Hypoxic 21)	Abundance Ratio Variability [%]: (Hyperoxic 0-95) / (Hyperoxic 21)	Abundance Ratio Variability [%]: (Hyperoxic 95) / (Hyperoxic 21)	Abundance Ratio Variability [%]: (Hyperoxic 21) / (Hypoxic 21)	Abundance Ratio Variability [%]: (Hypoxic 0-21) / (Hypoxic 21)	Abundance Ratio Variability [%]: (Hypoxic 10) / (Hypoxic 21)	Abundance Ratio Variability [%]: (Hypoxic 2) / (Hypoxic 21)	Abundances (Grouped): Hyperoxic 0-95	Abundances (Grouped): Hyperoxic 21	Abundances (Grouped): Hyperoxic 40	Abundances (Grouped): Hyperoxic 95	Abundances (Grouped): Hypoxic 0-21	Abundances (Grouped): Hypoxic 10	Abundances (Grouped): Hypoxic 2	Abundances (Grouped): Hypoxic 21	Abundances (Grouped): SM	Abundances (Grouped) CV [%]: Hyperoxic 0-95	Abundances (Grouped) CV [%]: Hyperoxic 21	Abundances (Grouped) CV [%]: Hyperoxic 40	Abundances (Grouped) CV [%]: Hyperoxic 95	Abundances (Grouped) CV [%]: Hypoxic 0-21	Abundances (Grouped) CV [%]: Hypoxic 10	Abundances (Grouped) CV [%]: Hypoxic 2	Abundances (Grouped) CV [%]: Hypoxic 21	Abundances (Grouped) CV [%]: SM	Quan Info	Found in Sample: F5: 130N, Sample, Hyperoxic 0-95, D1
[K].KLDEQYQK.[Y]	2xTMT6plex [K1; K8]; 1xTMT6plex [N-Term]	FALSE	0.000283189	1	1	3	P61758	P61758 [52-59]		1	1739.03	0.746	0.826	0.174	1.609	1.461	1.061	0.99491	0.999966	0.0615203	0.384147	0.496626	0.99998	108.24	80.26	15.88	25.39	21.64	31.45	219.6	79.5	0	226.8	502.8	570.5	522.2	457	530	78.59	105.79		64.04	38.51	40.25	19.41	29.7	56.47		High
[K].QPGNETADTVLK.[K]	1xTMT6plex [K12]; 1xTMT6plex [N-Term]	FALSE	0.000357242	1	1	1	P61758	P61758 [40-51]		0	1730.97	0.424	2.769	2.183	0.939	1.098	1.012	0.60515	0.0735575	0.834086	0.99995	0.999112	0.99998	0	0	0	0	0	0	134.5	317.3	572.8	878.8	136.5	159.6	147.2	145.4	209.3											n/a
[K].FMELNLAQK.[K]	1xTMT6plex [K9]; 1xTMT6plex [N-Term]	FALSE	0.000357242	1	1	1	P61758	P61758 [62-70]		0	1551.9	1.001	0.01	0.54	1.093	1.036	0.745	1	1.02234e-16	0.984809	0.99995	0.999975	0.74401	0	0	0	0	0	0	35.1	35.1	0	0	71	67.3	48.4	65	47.6											n/a
[K].NLSTATK.[N]	1xTMT6plex [K7]; 1xTMT6plex [N-Term]	FALSE	0.00149686	1	1	5	P61758	P61758 [147-153]		0	1192.73	4.144	0.813	0.012	1.112	0.936	1.124	0.00992707	0.999966	3.24607e-13	0.99995	0.999975	0.983687	471.53	147.06	28.67	2.45	46.51	37.49	236.5	57.1	43.7	185.4	653.4	814.4	841.1	597.4	624.3	64.56	124.62		0.62	71.66	73.98	55.99	75.64	24.68		n/a
[R].VYNWDVK.[R]	1xTMT6plex [K7]; 1xTMT6plex [N-Term]	FALSE	0.00154599	1	1	4	P61758	P61758 [179-185]		0	1381.79	0.359	0.629	1.11	1.117	1.18	1.029	0.0618017	0.718166	0.99766	0.99995	0.945583	0.99998	1.85	22.54	34.89	4.33	7.41	27.54	358.9	654.1	969.8	578.1	638.9	695.2	570.4	589.2	911.4	44.61	68.29	87.5	71.35	86.39	98.45	83.83	91.8	65.05		High
[R].NKDDSTK.[N]	2xTMT6plex [K2; K7]; 1xTMT6plex [N-Term]	FALSE	0.00226342	1	1	2	P61758	P61758 [188-194]		1	1494.87	0.99	0.848	0.126	1.149	1.142	0.983	0.996411	0.999966	0.0155093	0.99995	0.96665	0.99998	509.29	25.93	237.91	8.83	62.1	61.36	153	154.6	278.4	131.1	1404.5	1396.2	1201	1222.2	1062	96.07	114.2		121.64	26.7	38.06	37.45	18.5	24.08		High
[K].LDEQYQK.[Y]	1xTMT6plex [K7]; 1xTMT6plex [N-Term]	FALSE	0.00252033	1	1	2	P61758	P61758 [53-59]		0	1381.77	1.259	0.781	0.857	1.071	1.073	0.98	0.903211	0.998582	0.999998	0.99995	0.999112	0.99998	4.3	8.69	13.01	7.54	2.2	8.02	409	324.8	337	253.5	406	406.9	371.5	379	426.5	23.28	27.25	35.1	35.13	8.01	13.06	22.66	15.14	13.84		High
[K].ESTNSMETR.[F]	1xOxidation [M6]; 1xTMT6plex [N-Term]	FALSE	0.00341992	1	1	1	P61758	P61758 [96-104]		0	1299.6	0.01	4.52	0.294	0.703	1.068	0.468	3.23126e-16	0.226505	0.700963	0.487363	0.999975	0.0147022	0	0	0	0	0	0	0	24.4	299.5	110.4	58.4	88.8	38.9	83.1	39.4											n/a
[K].KKESTNSMETR.[F]	2xTMT6plex [K1; K2]; 1xTMT6plex [N-Term]	FALSE	0.00955924	1	1	1	P61758	P61758 [94-104]		2	1998.13	0.41	0.344	1.131	1.703	0.779	0.724	0.74137	0.871777	0.99766	0.406291	0.792766	0.682156	0	0	0	0	0	0	48	117.1	32.9	40.3	176.3	80.6	75	103.5	89.5											n/a
O43815	Striatin [OS=Homo sapiens]	0.001	6.049	4	2	2	2	780	86.1	5.27	5.08	2	cell-cell signaling;cell organization and biogenesis;developmental processes;signal transduction;other biological processes	plasma membrane;other membranes;cytosol;other cell component	other molecular function	Pf00400, Pf08232	6801	ENSG00000115808	STRN	hsa:6801; O43815; Q3KP65; Q53TQ8; Q9NP38	Extra-nuclear estrogen signaling; ALK mutants bind TKIs; Signaling by ALK fusions and activated point mutants; PIP3 activates AKT signaling; Constitutive Signaling by Aberrant PI3K in Cancer; PI5P, PP2A and IER3 Regulate PI3K/AKT Signaling; Signaling by cytosolic PDGFRA and PDGFRB fusion proteins		7	0	0.624	0.805	2.756	1.845	1.658	3.583	0.815021	0.971978	0.404123	0.107211	0.0407534	3.06714e-10	0	0	0	0	0	0	114.2	183	123.2	147.3	122.5	110.1	237.9
[truncated: 20,103 more rows]
[truncated: 40 more columns]
