# Supplementary material for: The Proteome of Extracellular Vesicles Released from Pulmonary Microvascular Endothelium Reveals Impact of Oxygen Conditions on Biotrauma
Source: Int J Mol Sci. 2024 Feb 19;25(4):2415. doi: 10.3390/ijms25042415 (PMC10889365; doi:10.3390/ijms25042415)
Supplement: Supplementary file 1 [file ijms-25-02415-s001.zip › Supplemental Data S2b.xlsx]

## Sheet: Overview
		process	FDR
0-21% O2	all genes	Regulation of phosphate metabolic process	8.59e-47
		Regulation of protein metabolic process	2.62e-44
		Regulation of cellular protein metabolic process	2.65e-44
		Organic substance metabolic process	6.29e-44
		Primary metabolic process	2.94e-43
		Cellular metabolic process	1.03e-41
		Metabolic process	4.35e-41
		Regulation of protein modification process	5.02e-40
		Nitrogen compound metabolic process	4.04e-39
		Regulation of metabolic process	4.2e-38
		Regulation of cellular metabolic process	4.27e-37
		Phosphorus metabolic process	1.16e-36
		Phosphate-containing compound metabolic process	7.34e-36
		Cellular macromolecule metabolic process	2.1e-36
		Macromolecule metabolic process	2.45e-35
		Regulation of primary metabolic process	2.45e-35
		Regulation of catalytic activity	3.46e-35
		PI3K-Akt signaling pathway	2.91e-33
		Diseases of signal transduction by growth factor receptors and second messengers	1.59e-32
		Regulation of macromolecule metabolic process	2.47e-32
0-95% O2	all genes	Disease	3.79e-40
		Signal Transduction	1.66e-38
		Immune System	3.78e-38
		Infectious disease	2.93e-29
		Cellular process	6.94e-29
		Vesicle-mediated transport	2.76e-28
		Cellular component organization	1.82e-26
		Membrane Trafficking	2.4e-27
		Cellular component organization or biogenesis	7.51e-26
		Innate Immune System	2.03e-25
		Shigellosis	5.02e-25
		Metabolism of proteins	1.29e-23
		Signaling by Receptor Tyrosine Kinases	1.29e-23
		Metabolic process	2.69e-23
		Positive regulation of biological process	1.1e-23
		Positive regulation of cellular process	2.5e-23
		Regulation of cellular component organization	2.52e-22
		Hemostasis	1.45e-21
		Regulation of cell death	2.05e-21
		Response to stimulus	2.45e-21
	UP-regul.	Vesicle-mediated transport	0.0158
		Endosomal transport	0.0289
		Regulation of organelle organization	0.0446
		Response to chemical	0.0446
		Regulation of cellular component organization	0.0446
	Down-reg.	Metabolic pathways	0.0024
		Metabolism	0.0113
		Lysosome	0.0153
		Small molecule metabolic process	0.0416
2% O2	all genes	Signal Transduction	1.72e-95
		Phosphorus metabolic process	4.91e-91
		Phosphate-containing compound metabolic process	4.91e-91
		Phosphorylation	1.24e-86
		Cellular metabolic process	1.68e-81
		Cellular process	4.31e-72
		Metabolic process	7.54e-71
		Pathways in cancer	6.19e-68
		Signaling by Receptor Tyrosine Kinases	1.14e-67
		Response to organic substance	4.42e-64
		Intracellular signal transduction	5.54e-61
		Disease	8e-61
		Organic substance metabolic process	1.69e-57
		Regulation of phosphate metabolic process	3.09e-57
		Diseases of signal transduction by growth factor receptors and second messengers	6.59e-57
		Cellular response to chemical stimulus	3.86e-56
		Response to endogenous stimulus	7.06e-56
		Cellular response to organic substance	7.06e-56
		Response to oxygen-containing compound	4.27e-55
		Primary metabolic process	5.2e-56
	UP-regul.	Golgi Associated Vesicle Biogenesis	0.0122
		Lysosome	0.0262
	Down-reg.	Spry regulation of FGF signaling	0.0249
		ERKs are inactivated	0.0249
		Negative regulation of MAPK pathway	0.0275
		FGFR3 signaling in chondrocyte proliferation and terminal diff.	0.03
10% O2	all genes	Macromolecule metabolic process	1.81e-22
		Nitrogen compound metabolic process	1.9e-19
		Organic substance metabolic process	5.88e-17
		Primary metabolic process	2.23e-16
		Cellular macromolecule metabolic process	3.44e-16
		Cellular metabolic process	1.78e-15
		Nucleic acid metabolic process	5.25e-14
		mRNA Splicing - Major Pathway	2.2e-14
		Regulation of nitrogen compound metabolic process	3.61e-13
		mRNA processing	6.11e-13
		Macromolecule modification	2.2e-13
		Processing of Capped Intron-Containing Pre-mRNA	2.26e-12
		Cellular protein modification process	2.32e-12
		mRNA splicing, via spliceosome	2.44e-12
		RNA splicing	2.57e-12
		Gene expression	2.57e-12
		Regulation of macromolecule metabolic process	2.57e-12
		Regulation of cellular metabolic process	2.87e-12
		Cellular nitrogen compound metabolic process	4.75e-12
		Regulation of primary metabolic process	7.36e-12
95% O2	all genes	Disease	1.45e-75
		Macromolecule metabolic process	1.03e-69
		Metabolic process	4.78e-65
		Organic substance metabolic process	8.75e-64
		Cellular metabolic process	3.46e-63
		Primary metabolic process	1.47e-62
		Nitrogen compound metabolic process	1.6e-62
		Infectious disease	9.53e-61
		Cellular process	1.37e-59
		Regulation of protein metabolic process	1.51e-54
		Metabolism of proteins	2.49e-52
		Signal Transduction	3e-51
		Cellular component organization or biogenesis	5.12e-49
		Cellular component organization	1.43e-44
		Cellular nitrogen compound metabolic process	1.72e-44
		Positive regulation of metabolic process	9.6e-44
		Regulation of metabolic process	2.3e-43
		Metabolism of RNA	2.46e-42
		Positive regulation of nitrogen compound metabolic process	1.42e-41
		Cellular macromolecule metabolic process	3.74e-41
	UP-regul.	Disease	0.0298
		Membrane Trafficking	0.0298
		Metabolism of proteins	0.0298
	Down-reg.	Cellular process	8.88e-05
		Response to stimulus	8.88e-05
		Cellular metabolic process	0.000122
		Organic substance metabolic process	0.000122
		Metabolic process	0.000229
		Response to chemical	0.00191
		Response to stress	0.00233
		Cellular response to chemical stimulus	0.00257
		Macromolecule metabolic process	0.00285
		Nitrogen compound metabolic process	0.00608
		Viral process	0.00608
		Cellular response to stimulus	0.00745
		Symbiotic process	0.00967
		Primary metabolic process	0.0016
		Cellular response to stress	0.0021
		Intracellular transport	0.0023
		Metabolism of proteins	0.0027
		Regulation of metabolic process	0.0037
		Response to organic substance	0.0052
		Vesicle-mediated transport	0.0052

## Sheet: 0-21%O2
# background genes	# genes	category	chart color	description	FDR value	genes	network.SUID	nodes.SUID	p-value	PMID	term name	transferred FDR value	year
1816	205	GO Biological Process		Regulation of phosphate metabolic process	8.59e-47	DVL2|PPP2R5B|C12orf5|PPP1R15A|MAPK1|CSK|GCK|VTN|CCND1|PFKFB4|ENO1|APOA1|EGR1|TARDBP|C3|SYMPK|PIN1|STYXL1|FXR2|RAF1|APOE|PPP1R1B|LGALS3|CCNA1|KRAS|CCNB1|PDGFRA|CDK4|PPP1R1A|LRP6|PPP2R5A|PPP2R3C|IPO5|PDGFRB|FLT4|RBL2|AXIN1|MAP2K2|MAPK3|SMG6|KDR|YWHAE|FGF2|PPP2R3A|AMBP|EGF|HPX|ERBB3|RB1|TP53|ERBB2|IGFBP4|CCNA2|EGFR|FLT1|WNT3A|APP|FZD1|KIT|BRAF|ARAF|FGFR4|BAX|WNT1|LRP5|PLK1|IGFBP6|MAP2K1|IGF1|INSR|IR…	202	431|663|1521|739|809|1237|871|505|377|587|767|583|851|1107|1445|1497|609|711|1249|241|1041|751|1039|671|317|685|509|1395|1399|1361|1349|1379|461|557|641|1415|1383|821|933|1085|371|1001|1161|1365|1083|577|1493|715|787|865|741|335|979|969|1387|265|361|503|723|1257|819|807|1403|675|445|299|1293|409|1473|983|453|1491|895|579|1495|1503|313|581|637|1247|941|683|1127|1163|1177|879|1523|559|849|493|325|1…	6.69e-51		GO:0019220	4806600683616876	0
2828	254	GO Biological Process		Regulation of protein metabolic process	2.62e-44	DVL2|PPP2R5B|PPP1R15A|MAPK1|CSK|AGO2|PLAT|RPS6KB1|VTN|NFKB1|CCND1|SKP1|IGFBP5|ENO1|APOA1|EGR1|TARDBP|C3|SYMPK|PIN1|STYXL1|FXR2|RAF1|APOE|PPP1R1B|LGALS3|SCO1|CCNA1|KRAS|EIF2S1|CCNB1|PDGFRA|CDK4|PPP1R1A|MDM2|IGF2BP3|DERL1|LRP6|PPP2R5A|PPP2R3C|IPO5|CDH1|PDGFRB|SNX1|FLT4|AXIN1|MAP2K2|MAPK3|KDR|CTCF|YWHAE|CUL3|FGF2|PPP2R3A|RAB7A|AMBP|EGF|HPX|IDE|ERBB3|RB1|NKD1|TP53|ERBB2|IGFBP4|CCNA2|EGFR|FLT1|WNT3A|A…	202	431|663|739|809|1237|1097|529|337|505|437|377|1195|1407|767|583|851|1107|1445|1497|609|711|1249|241|1041|751|1039|869|671|317|765|685|509|1395|1399|523|1101|861|1361|1349|1379|461|271|557|289|641|1383|821|933|371|957|1001|1481|1161|1365|633|1083|577|1493|1485|715|787|867|865|741|335|979|969|1387|265|361|495|459|503|723|1257|819|693|807|1403|229|675|1037|445|631|1021|299|1293|409|1473|983|1491|895…	6.12e-48		GO:0051246	4558169870868026	0
2693	247	GO Biological Process		Regulation of cellular protein metabolic process	2.65e-44	DVL2|PPP2R5B|PPP1R15A|MAPK1|CSK|AGO2|PLAT|RPS6KB1|VTN|NFKB1|CCND1|SKP1|IGFBP5|ENO1|APOA1|EGR1|TARDBP|C3|SYMPK|PIN1|STYXL1|FXR2|RAF1|APOE|PPP1R1B|LGALS3|SCO1|CCNA1|KRAS|EIF2S1|CCNB1|PDGFRA|CDK4|PPP1R1A|MDM2|IGF2BP3|DERL1|LRP6|PPP2R5A|PPP2R3C|IPO5|PDGFRB|FLT4|AXIN1|MAP2K2|MAPK3|KDR|CTCF|YWHAE|CUL3|FGF2|PPP2R3A|AMBP|EGF|HPX|IDE|ERBB3|RB1|TP53|ERBB2|IGFBP4|CCNA2|EGFR|FLT1|WNT3A|APP|GEMIN5|PPARG|FZD1|…	202	431|663|739|809|1237|1097|529|337|505|437|377|1195|1407|767|583|851|1107|1445|1497|609|711|1249|241|1041|751|1039|869|671|317|765|685|509|1395|1399|523|1101|861|1361|1349|1379|461|557|641|1383|821|933|371|957|1001|1481|1161|1365|1083|577|1493|1485|715|787|865|741|335|979|969|1387|265|361|495|459|503|723|1257|819|693|807|1403|229|675|1037|445|631|1021|299|1293|409|1473|983|1491|895|873|1191|619|57…	8.25e-48		GO:0032268	4.55768e+16	0
7755	452	GO Biological Process		Organic substance metabolic process	6.29e-44	ST6GALNAC1|PPP2R5B|C12orf5|PPP1R15A|CETP|APOH|SF3A1|SNRPD3|MAPK1|PMM1|PAPOLA|CTSG|GZMH|GNPNAT1|MMP2|CSK|SCG3|AGO2|TG|PLAT|PPP2CB|FBL|SLC5A5|PON1|FKBP14|GCK|RPS6KB1|ALDOC|NFKB1|CCND1|APOC3|SKP1|PFKFB4|APOB|SNX17|IGFBP2|IGFBP5|PPP3R1|ENO1|WDR77|APOA1|TTR|CPSF3|PAPOLG|FAM98A|TARDBP|ATP7B|FAAH|LIPE|HIST1H4F|GOT2|C3|SYMPK|PIN1|STYXL1|YWHAH|MBD4|MYOD1|RAF1|APOE|GFPT2|G6PC|PPP1R1B|FUS|LGALS3|CCNA1|KRAS|…	202	681|663|1521|739|655|239|411|773|809|1435|1513|1301|1341|451|781|1237|1169|1097|1417|529|729|1353|835|841|1441|871|337|1291|437|377|429|1195|587|679|573|1427|1407|585|767|1393|583|1303|1265|891|759|1107|1309|825|863|1131|737|1445|1497|609|711|831|599|1281|241|1041|1519|475|751|1199|1039|671|317|765|1113|685|509|1395|1399|523|1101|861|425|1349|783|557|289|641|499|821|933|1085|1527|273|371|963|957|…	2.45e-47		GO:0071704	4520134935455473	0
7332	436	GO Biological Process		Primary metabolic process	2.94e-43	ST6GALNAC1|PPP2R5B|PPP1R15A|CETP|APOH|SF3A1|SNRPD3|MAPK1|PMM1|PAPOLA|CTSG|GZMH|GNPNAT1|MMP2|CSK|SCG3|AGO2|PLAT|PPP2CB|FBL|PON1|FKBP14|GCK|RPS6KB1|ALDOC|NFKB1|CCND1|APOC3|SKP1|PFKFB4|APOB|SNX17|IGFBP2|IGFBP5|PPP3R1|ENO1|WDR77|APOA1|TTR|CPSF3|PAPOLG|FAM98A|TARDBP|ATP7B|FAAH|LIPE|HIST1H4F|GOT2|C3|SYMPK|PIN1|STYXL1|YWHAH|MBD4|MYOD1|RAF1|APOE|GFPT2|G6PC|PPP1R1B|FUS|LGALS3|CCNA1|KRAS|EIF2S1|CCNB1|PDGFR…	202	681|663|739|655|239|411|773|809|1435|1513|1301|1341|451|781|1237|1169|1097|529|729|1353|841|1441|871|337|1291|437|377|429|1195|587|679|573|1427|1407|585|767|1393|583|1303|1265|891|759|1107|1309|825|863|1131|737|1445|1497|609|711|831|599|1281|241|1041|1519|475|751|1199|1039|671|317|765|685|509|1395|1399|523|1101|861|425|1349|783|557|641|499|821|933|1085|1527|273|371|963|957|1203|1087|1001|1149|148…	1.37e-46		GO:0044238	4453165266958784	0
7513	439	GO Biological Process		Cellular metabolic process	1.03e-41	ST6GALNAC1|PPP2R5B|C12orf5|PPP1R15A|CETP|APOH|SF3A1|SNRPD3|MAPK1|PMM1|PAPOLA|CTSG|GNPNAT1|MMP2|CSK|SCG3|AGO2|TG|PLAT|PPP2CB|FBL|SLC5A5|PON1|FKBP14|GCK|RPS6KB1|ALDOC|NFKB1|CCND1|APOC3|SKP1|PFKFB4|APOB|IGFBP2|IGFBP5|PPP3R1|ENO1|WDR77|APOA1|TTR|CPSF3|PAPOLG|FAM98A|TARDBP|FAAH|LIPE|HIST1H4F|GOT2|C3|SYMPK|PIN1|STYXL1|MBD4|MYOD1|RAF1|APOE|GFPT2|G6PC|PPP1R1B|FUS|LGALS3|CCNA1|KRAS|EIF2S1|CCNB1|PDGFRA|CDK…	202	681|663|1521|739|655|239|411|773|809|1435|1513|1301|451|781|1237|1169|1097|1417|529|729|1353|835|841|1441|871|337|1291|437|377|429|1195|587|679|1427|1407|585|767|1393|583|1303|1265|891|759|1107|825|863|1131|737|1445|1497|609|711|599|1281|241|1041|1519|475|751|1199|1039|671|317|765|685|509|1395|1399|523|1101|861|425|991|1349|783|843|557|251|289|641|499|821|933|1085|1527|273|371|963|957|1203|1001|1…	5.59e-45		GO:0044237	4298716277529483	0
8298	464	GO Biological Process		Metabolic process	4.35e-41	ST6GALNAC1|PPP2R5B|C12orf5|PPP1R15A|CETP|APOH|SF3A1|SNRPD3|MAPK1|PMM1|PAPOLA|CTSG|GZMH|GNPNAT1|MMP2|CSK|SCG3|AGO2|TG|PLAT|PPP2CB|FBL|SLC5A5|PON1|FKBP14|GCK|RPS6KB1|ALDOC|NFKB1|CCND1|APOC3|SKP1|PFKFB4|APOB|SNX17|IGFBP2|IGFBP5|PPP3R1|ENO1|WDR77|APOA1|TTR|CPSF3|PAPOLG|FAM98A|TARDBP|ATP7B|FAAH|LIPE|HIST1H4F|GOT2|C3|SYMPK|PIN1|STYXL1|YWHAH|MBD4|MYOD1|RAF1|APOE|GFPT2|G6PC|PPP1R1B|FUS|LGALS3|CCNA1|KRAS|…	202	681|663|1521|739|655|239|411|773|809|1435|1513|1301|1341|451|781|1237|1169|1097|1417|529|729|1353|835|841|1441|871|337|1291|437|377|429|1195|587|679|573|1427|1407|585|767|1393|583|1303|1265|891|759|1107|1309|825|863|1131|737|1445|1497|609|711|831|599|1281|241|1041|1519|475|751|1199|1039|671|317|765|1113|685|509|1395|1399|523|1101|861|425|991|1349|783|843|557|251|289|641|499|821|933|1085|1527|273|…	2.71e-44		GO:0008152	4236151074304536	0
1870	195	GO Biological Process		Regulation of protein modification process	5.02e-40	DVL2|PPP2R5B|PPP1R15A|MAPK1|CSK|VTN|CCND1|SKP1|APOA1|EGR1|TARDBP|C3|SYMPK|PIN1|STYXL1|FXR2|RAF1|APOE|PPP1R1B|LGALS3|CCNA1|KRAS|CCNB1|PDGFRA|CDK4|PPP1R1A|DERL1|LRP6|PPP2R5A|PPP2R3C|IPO5|PDGFRB|FLT4|AXIN1|MAP2K2|MAPK3|KDR|CTCF|YWHAE|CUL3|FGF2|PPP2R3A|AMBP|EGF|HPX|ERBB3|RB1|TP53|ERBB2|IGFBP4|CCNA2|EGFR|FLT1|WNT3A|APP|FZD1|KIT|BRAF|ARAF|FGFR4|BAX|WNT1|LRP5|PLK1|IGFBP6|MAP2K1|IGF1|INSR|PPP4R4|YWHAG|CO…	202	431|663|739|809|1237|505|377|1195|583|851|1107|1445|1497|609|711|1249|241|1041|751|1039|671|317|685|509|1395|1399|861|1361|1349|1379|461|557|641|1383|821|933|371|957|1001|1481|1161|1365|1083|577|1493|715|787|865|741|335|979|969|1387|265|361|503|723|1257|819|807|1403|675|445|299|1293|409|1473|983|1491|895|1191|579|1495|1503|313|581|1247|941|683|1127|1163|1177|879|1523|559|849|493|325|1389|329|1323…	3.52e-43		GO:0031399	4129929628285498	0
6852	410	GO Biological Process		Nitrogen compound metabolic process	4.04e-39	ST6GALNAC1|PPP2R5B|PPP1R15A|CETP|APOH|SF3A1|SNRPD3|MAPK1|PMM1|PAPOLA|CTSG|GZMH|GNPNAT1|MMP2|CSK|SCG3|AGO2|TG|PLAT|PPP2CB|FBL|SLC5A5|PON1|FKBP14|GCK|RPS6KB1|ALDOC|NFKB1|CCND1|APOC3|SKP1|APOB|IGFBP2|IGFBP5|PPP3R1|ENO1|WDR77|APOA1|TTR|CPSF3|PAPOLG|FAM98A|TARDBP|ATP7B|LIPE|HIST1H4F|GOT2|C3|SYMPK|PIN1|STYXL1|MBD4|MYOD1|RAF1|APOE|GFPT2|G6PC|PPP1R1B|FUS|LGALS3|CCNA1|KRAS|EIF2S1|CCNB1|PDGFRA|CDK4|MDM2|IG…	202	681|663|739|655|239|411|773|809|1435|1513|1301|1341|451|781|1237|1169|1097|1417|529|729|1353|835|841|1441|871|337|1291|437|377|429|1195|679|1427|1407|585|767|1393|583|1303|1265|891|759|1107|1309|863|1131|737|1445|1497|609|711|599|1281|241|1041|1519|475|751|1199|1039|671|317|765|685|509|1395|523|1101|861|1349|783|557|641|499|821|933|1085|1527|273|371|963|957|1001|1481|1161|1339|551|1365|633|1083|5…	3.15e-42		GO:0006807	4039361863488939	0
6948	409	GO Biological Process		Regulation of metabolic process	4.2e-38	DVL2|PPP2R5B|C12orf5|PPP1R15A|MAPK1|PAPOLA|NUTF2|CSK|AGO2|PLAT|PPP2CB|GCK|RPS6KB1|VTN|NFKB1|CCND1|APOC3|SKP1|PFKFB4|APOB|IGFBP5|PPP3R1|ENO1|WDR77|APOA1|FAM98A|EGR1|TARDBP|HIST1H4F|C3|SYMPK|PIN1|STYXL1|YWHAH|MYOD1|FXR2|RAF1|APOE|G6PC|PPP1R1B|FUS|LGALS3|SCO1|CCNA1|KRAS|EIF2S1|MBD2|CCNB1|SORT1|PDGFRA|CDK4|PPP1R1A|CCT7|MDM2|IGF2BP3|DERL1|KHK|COX17|LRP6|PPP2R5A|PPP2R3C|IPO5|THOC1|SLC6A4|CDH1|PDGFRB|CI…	202	431|663|1521|739|809|1513|629|1237|1097|529|729|871|337|505|437|377|429|1195|587|679|1407|585|767|1393|583|759|851|1107|1131|1445|1497|609|711|831|1281|1249|241|1041|475|751|1199|1039|869|671|317|765|1113|685|1155|509|1395|1399|1311|523|1101|861|425|991|1361|1349|1379|461|783|843|271|557|251|289|641|1415|1383|499|821|933|1085|1527|371|957|1001|1481|1161|551|1365|633|1083|577|967|1223|1493|1485|71…	3.6e-41		GO:0019222	383767507096021	0
6239	383	GO Biological Process		Regulation of cellular metabolic process	4.27e-37	DVL2|PPP2R5B|C12orf5|PPP1R15A|MAPK1|PAPOLA|CSK|AGO2|PLAT|GCK|RPS6KB1|VTN|NFKB1|CCND1|APOC3|SKP1|PFKFB4|IGFBP5|PPP3R1|ENO1|WDR77|APOA1|EGR1|TARDBP|HIST1H4F|C3|SYMPK|PIN1|STYXL1|YWHAH|MYOD1|FXR2|RAF1|APOE|PPP1R1B|FUS|LGALS3|SCO1|CCNA1|KRAS|EIF2S1|MBD2|CCNB1|PDGFRA|CDK4|PPP1R1A|CCT7|MDM2|IGF2BP3|DERL1|KHK|COX17|LRP6|PPP2R5A|PPP2R3C|IPO5|THOC1|CDH1|PDGFRB|FLT4|RBL2|AXIN1|SRCAP|MAP2K2|MAPK3|SMG6|PAX8|…	202	431|663|1521|739|809|1513|1237|1097|529|871|337|505|437|377|429|1195|587|1407|585|767|1393|583|851|1107|1131|1445|1497|609|711|831|1281|1249|241|1041|751|1199|1039|869|671|317|765|1113|685|509|1395|1399|1311|523|1101|861|425|991|1361|1349|1379|461|783|271|557|641|1415|1383|499|821|933|1085|1527|371|957|1001|1481|1161|551|1365|1083|577|967|1223|1493|1485|715|787|865|741|335|1023|979|1035|969|455|1…	3.99e-40		GO:0031323	3.83696e+16	0
2134	203	GO Biological Process		Phosphorus metabolic process	1.16e-36	PPP2R5B|C12orf5|PPP1R15A|CETP|MAPK1|CTSG|GNPNAT1|CSK|PPP2CB|PON1|GCK|RPS6KB1|ALDOC|NFKB1|CCND1|SKP1|PFKFB4|PPP3R1|ENO1|APOA1|LIPE|STYXL1|MBD4|MYOD1|RAF1|GFPT2|G6PC|KRAS|EIF2S1|CCNB1|PDGFRA|CDK4|KHK|PPP2R5A|PDGFRB|CILP|FLT4|MAP2K2|MAPK3|AKT3|KDR|LCAT|YWHAE|CUL3|FGF2|PPP2R3A|EGF|ERBB3|SORD|G6PC3|ERBB2|PFKL|CTTNBP2NL|RAB5A|PYURF|CCNA2|RASA1|PLA2G7|EGFR|PPP4C|FLT1|APP|FUK|KIT|BRAF|ARAF|HK2|SSU72|FLAD…	202	663|1521|739|655|809|1301|451|1237|729|841|871|337|1291|437|377|1195|587|585|767|583|863|711|599|1281|241|1519|475|317|765|685|509|1395|425|1349|557|251|641|821|933|273|371|963|1001|1481|1161|1365|577|715|1543|1245|741|1095|1327|1023|381|979|1035|1283|969|775|1387|361|853|723|1257|819|727|395|373|807|567|229|353|303|1105|299|409|1511|1473|983|387|453|873|619|855|1429|1495|1273|637|1247|1471|1483|…	1.17e-39		GO:0006793	3.79355e+16	0
2107	200	GO Biological Process		Phosphate-containing compound metabolic process	7.34e-36	PPP2R5B|C12orf5|PPP1R15A|CETP|MAPK1|CTSG|CSK|PPP2CB|PON1|GCK|RPS6KB1|ALDOC|NFKB1|CCND1|SKP1|PFKFB4|PPP3R1|ENO1|APOA1|LIPE|STYXL1|MBD4|MYOD1|RAF1|GFPT2|G6PC|KRAS|EIF2S1|CCNB1|PDGFRA|CDK4|KHK|PPP2R5A|PDGFRB|CILP|FLT4|MAP2K2|MAPK3|AKT3|KDR|LCAT|YWHAE|CUL3|FGF2|PPP2R3A|EGF|ERBB3|SORD|G6PC3|ERBB2|PFKL|CTTNBP2NL|RAB5A|PYURF|CCNA2|RASA1|PLA2G7|EGFR|PPP4C|FLT1|APP|FUK|KIT|BRAF|ARAF|HK2|SSU72|FLAD1|FGFR4|…	202	663|1521|739|655|809|1301|1237|729|841|871|337|1291|437|377|1195|587|585|767|583|863|711|599|1281|241|1519|475|317|765|685|509|1395|425|1349|557|251|641|821|933|273|371|963|1001|1481|1161|1365|577|715|1543|1245|741|1095|1327|1023|381|979|1035|1283|969|775|1387|361|853|723|1257|819|727|395|373|807|567|229|303|1105|299|409|1511|1473|983|387|453|873|619|855|1429|1495|1273|637|1247|1471|1483|1263|143…	7.99e-39		GO:0006796	3.71343e+16	0
4976	330	GO Biological Process		Cellular macromolecule metabolic process	2.1e-36	ST6GALNAC1|PPP2R5B|PPP1R15A|SNRPD3|MAPK1|PMM1|PAPOLA|CTSG|MMP2|CSK|SCG3|AGO2|PLAT|PPP2CB|FBL|FKBP14|RPS6KB1|NFKB1|CCND1|SKP1|APOB|IGFBP2|IGFBP5|PPP3R1|APOA1|TTR|CPSF3|FAM98A|TARDBP|LIPE|HIST1H4F|C3|SYMPK|PIN1|STYXL1|MBD4|MYOD1|RAF1|APOE|GFPT2|G6PC|PPP1R1B|CCNA1|KRAS|EIF2S1|CCNB1|PDGFRA|CDK4|PPP1R1A|MDM2|IGF2BP3|DERL1|PPP2R5A|THOC1|PDGFRB|SNX1|FLT4|SRCAP|MAP2K2|MAPK3|SMG6|PAX8|AKT3|KDR|LCAT|CTCF|Y…	202	681|663|739|773|809|1435|1513|1301|781|1237|1169|1097|529|729|1353|1441|337|437|377|1195|679|1427|1407|585|583|1303|1265|759|1107|863|1131|1445|1497|609|711|599|1281|241|1041|1519|475|751|671|317|765|685|509|1395|1399|523|1101|861|1349|783|557|289|641|499|821|933|1085|1527|273|371|963|957|1001|1481|1161|1339|551|1365|633|1083|577|1223|1493|1485|1421|715|333|403|865|741|335|1327|417|1023|381|979|1…	2.45e-38		GO:0044260	3667778070526608	0
6137	375	GO Biological Process		Macromolecule metabolic process	2.45e-35	ST6GALNAC1|PPP2R5B|PPP1R15A|APOH|SF3A1|SNRPD3|MAPK1|PMM1|PAPOLA|CTSG|GZMH|MMP2|CSK|SCG3|AGO2|PLAT|PPP2CB|FBL|FKBP14|RPS6KB1|NFKB1|CCND1|APOC3|SKP1|APOB|IGFBP2|IGFBP5|PPP3R1|WDR77|APOA1|TTR|CPSF3|PAPOLG|FAM98A|TARDBP|ATP7B|LIPE|HIST1H4F|C3|SYMPK|PIN1|STYXL1|MBD4|MYOD1|RAF1|APOE|GFPT2|G6PC|PPP1R1B|FUS|LGALS3|CCNA1|KRAS|EIF2S1|MBD2|CCNB1|PDGFRA|CDK4|PPP1R1A|MDM2|IGF2BP3|DERL1|PPP2R5A|THOC1|PDGFRB|SN…	202	681|663|739|239|411|773|809|1435|1513|1301|1341|781|1237|1169|1097|529|729|1353|1441|337|437|377|429|1195|679|1427|1407|585|1393|583|1303|1265|891|759|1107|1309|863|1131|1445|1497|609|711|599|1281|241|1041|1519|475|751|1199|1039|671|317|765|1113|685|509|1395|1399|523|1101|861|1349|783|557|289|641|499|821|933|1085|1527|273|371|963|957|1001|1481|1161|1339|551|1365|633|1083|577|1223|1493|1485|1421|7…	3.06e-38		GO:0043170	3.66108e+16	0
6032	371	GO Biological Process		Regulation of primary metabolic process	2.45e-35	DVL2|PPP2R5B|C12orf5|PPP1R15A|MAPK1|PAPOLA|CSK|AGO2|PLAT|GCK|RPS6KB1|VTN|NFKB1|CCND1|APOC3|SKP1|PFKFB4|APOB|IGFBP5|PPP3R1|ENO1|WDR77|APOA1|EGR1|TARDBP|HIST1H4F|C3|SYMPK|PIN1|STYXL1|YWHAH|MYOD1|FXR2|RAF1|APOE|PPP1R1B|FUS|LGALS3|SCO1|CCNA1|KRAS|EIF2S1|MBD2|CCNB1|PDGFRA|CDK4|PPP1R1A|CCT7|MDM2|IGF2BP3|DERL1|KHK|LRP6|PPP2R5A|PPP2R3C|IPO5|THOC1|CDH1|PDGFRB|SNX1|FLT4|RBL2|AXIN1|SRCAP|MAP2K2|MAPK3|SMG6|P…	202	431|663|1521|739|809|1513|1237|1097|529|871|337|505|437|377|429|1195|587|679|1407|585|767|1393|583|851|1107|1131|1445|1497|609|711|831|1281|1249|241|1041|751|1199|1039|869|671|317|765|1113|685|509|1395|1399|1311|523|1101|861|425|1361|1349|1379|461|783|271|557|289|641|1415|1383|499|821|933|1085|1527|371|957|1001|1481|1161|551|1365|633|1083|577|1223|1493|1485|715|787|867|865|741|335|979|1035|969|45…	3.2e-39		GO:0080090	3.66108e+16	0
2386	213	GO Biological Process		Regulation of catalytic activity	3.46e-35	DVL2|PPP2R5B|C12orf5|PPP1R15A|APOH|MAPK1|CSK|VTN|NFKB1|CCND1|APOC3|SKP1|APOA1|EGR1|C3|PIN1|STYXL1|RAF1|APOE|PPP1R1B|LGALS3|CCNA1|KRAS|CCNB1|SORT1|PDGFRA|CDK4|PPP1R1A|MDM2|COX17|LRP6|PPP2R5A|PPP2R3C|IPO5|PDGFRB|FLT4|RBL2|AXIN1|MAP2K2|MAPK3|SMG6|KDR|YWHAE|FGF2|PPP2R3A|AMBP|EGF|ERBB3|RB1|TP53|ERBB2|CCNA2|RASA1|EGFR|PPP4C|FLT1|WNT3A|APP|RHOC|PPARG|KIT|BRAF|FGFR4|BAX|PSME3|LRP5|FABP1|ABCE1|CCT2|PLK1|I…	202	431|663|1521|739|239|809|1237|505|437|377|429|1195|583|851|1445|609|711|241|1041|751|1039|671|317|685|1155|509|1395|1399|523|991|1361|1349|1379|461|557|641|1415|1383|821|933|1085|371|1001|1161|1365|1083|577|715|787|865|741|979|1035|969|775|1387|265|361|279|459|723|1257|807|1403|229|445|631|1469|1075|299|1293|409|1473|983|453|1491|895|873|579|1429|1495|313|581|637|911|1127|999|1531|1163|1177|879|1…	4.84e-38		GO:0050790	3.64609e+16	0
350	80	KEGG Pathways		PI3K-Akt signaling pathway	2.91e-33	PPP2R5B|MAPK1|PPP2CB|RPS6KB1|VTN|NFKB1|CCND1|YWHAH|RAF1|G6PC|KRAS|PDGFRA|CDK4|MDM2|PPP2R5A|PPP2R3C|PDGFRB|FLT4|RBL2|MAP2K2|MAPK3|AKT3|KDR|YWHAE|FGF2|PPP2R3A|EGF|ERBB3|G6PC3|TP53|ERBB2|EGFR|FLT1|KIT|FGFR4|MAP2K1|IGF1|INSR|IRS1|YWHAG|RPS6KB2|PPP2R1B|MET|F2R|PPP2R1A|GSK3B|PPP2R2A|PPP2R2C|PPP2R5E|FGFR3|EIF4EBP1|ERBB4|MTOR|NRAS|YWHAB|G6PC2|TEK|YWHAQ|PPP2R3B|AKT2|GRB2|PPP2R2B|BAD|YWHAZ|INS|BCL2|RELA|IG…	202	663|809|729|337|505|437|377|831|241|475|317|509|1395|523|1349|1379|557|641|1415|821|933|273|371|1001|1161|1365|577|715|1245|865|741|969|1387|723|807|409|1473|983|453|895|619|1495|637|1127|1163|1177|879|325|1389|1323|901|1151|593|1451|923|897|1215|833|1475|877|1271|859|1043|1143|1457|749|389|401|1123|845|277|497|977|799|1135|379|537|467|1231|391	8.67e-36		hsa04151	3.45361e+16	0
392	84	Reactome Pathways		Diseases of signal transduction by growth factor receptors and second messengers	1.59e-32	PPP2R5B|MAPK1|CSK|PPP2CB|FGFR1OP2|SKP1|RAF1|KRAS|PDGFRA|MDM2|LRP6|PPP2R5A|PDGFRB|AXIN1|MAP2K2|MAPK3|AKT3|STRN|KDR|FGF2|EGF|ERBB3|ERBB2|EGFR|WNT3A|KIT|BRAF|ARAF|FGFR4|PSME3|LRP5|MAP2K1|IRS1|RPS6KB2|PPP2R1B|MET|PPP2R1A|GSK3B|CUL1|HDAC6|FIP1L1|PPP2R5E|LCK|FGFR3|PTPN11|PPP1CC|ERBB4|CTNNB1|FYN|SND1|FXR1|VCP|TGFBR2|MTOR|FGFR1OP|LMNA|SHOC2|NRAS|YWHAB|HDAC1|SRC|IRS2|AKT2|GRB2|BAD|PPP1CB|KSR1|FKBP1A|FGFR1…	202	663|809|1237|729|1125|1195|241|317|509|523|1361|1349|557|1383|821|933|273|793|371|1161|577|715|741|969|265|723|1257|819|807|229|445|409|453|619|1495|637|1163|1177|925|493|1545|1389|915|1323|1285|881|1151|989|1509|987|707|397|1487|593|907|519|1325|1451|923|651|815|1411|877|1271|1043|1277|1375|743|1123|803|887|277|701|977|953|799|1135|379|745|1111|421|1231|1269|391	7.31e-36		HSA-5663202	3379860287567955	0
6407	378	GO Biological Process		Regulation of macromolecule metabolic process	2.47e-32	DVL2|PPP2R5B|C12orf5|PPP1R15A|MAPK1|PAPOLA|NUTF2|CSK|AGO2|PLAT|PPP2CB|GCK|RPS6KB1|VTN|NFKB1|CCND1|SKP1|APOB|IGFBP5|PPP3R1|ENO1|WDR77|APOA1|FAM98A|EGR1|TARDBP|HIST1H4F|C3|SYMPK|PIN1|STYXL1|YWHAH|MYOD1|FXR2|RAF1|APOE|G6PC|PPP1R1B|FUS|LGALS3|SCO1|CCNA1|KRAS|EIF2S1|MBD2|CCNB1|SORT1|PDGFRA|CDK4|PPP1R1A|CCT7|MDM2|IGF2BP3|DERL1|KHK|LRP6|PPP2R5A|PPP2R3C|IPO5|THOC1|SLC6A4|CDH1|PDGFRB|CILP|SNX1|FLT4|RBL2|A…	202	431|663|1521|739|809|1513|629|1237|1097|529|729|871|337|505|437|377|1195|679|1407|585|767|1393|583|759|851|1107|1131|1445|1497|609|711|831|1281|1249|241|1041|475|751|1199|1039|869|671|317|765|1113|685|1155|509|1395|1399|1311|523|1101|861|425|1361|1349|1379|461|783|843|271|557|251|289|641|1415|1383|499|821|933|1085|1527|371|957|1001|1481|1161|551|1365|633|1083|577|1223|1493|1485|715|787|867|865|74…	3.65e-35		GO:0060255	3.36073e+16	0
4874	318	GO Biological Process		Negative regulation of cellular process	4.76e-32	DVL2|PPP2R5B|C12orf5|PPP1R15A|CETP|APOH|MAPK1|CSK|AGO2|PLAT|PPP2CB|GCK|RPS6KB1|VTN|NFKB1|CCND1|APOC3|SKP1|IGFBP2|IGFBP5|ENO1|WDR77|APOA1|EGR1|TARDBP|HIST1H4F|C3|PIN1|STYXL1|YWHAH|MYOD1|FXR2|RAF1|APOE|PPFIA1|PPP1R1B|FUS|LGALS3|SCO1|KRAS|EIF2S1|MBD2|CCNB1|SORT1|PDGFRA|CDK4|PPP1R1A|MDM2|IGF2BP3|LRP6|PPP2R5A|IPO5|THOC1|SLC6A4|CDH1|PDGFRB|CILP|FLT4|RBL2|AXIN1|SMG6|PAX8|AKT3|STRN|KDR|CTCF|YWHAE|CUL3|FG…	202	431|663|1521|739|655|239|809|1237|1097|529|729|871|337|505|437|377|429|1195|1427|1407|767|1393|583|851|1107|1131|1445|609|711|831|1281|1249|241|1041|479|751|1199|1039|869|317|765|1113|685|1155|509|1395|1399|523|1101|1361|1349|461|783|843|271|557|251|641|1415|1383|1085|1527|273|793|371|957|1001|1481|1161|551|1365|633|1083|577|967|1223|1485|715|787|867|865|741|335|1095|1327|405|1035|969|1279|1459|1…	7.41e-35		GO:0048523	3.33224e+16	0
5244	332	GO Biological Process		Organonitrogen compound metabolic process	1.02e-31	ST6GALNAC1|PPP2R5B|PPP1R15A|CETP|APOH|SNRPD3|MAPK1|PMM1|CTSG|GZMH|MMP2|CSK|SCG3|AGO2|TG|PLAT|PPP2CB|FBL|SLC5A5|PON1|FKBP14|GCK|RPS6KB1|ALDOC|NFKB1|CCND1|APOC3|SKP1|APOB|IGFBP2|IGFBP5|PPP3R1|ENO1|APOA1|TTR|FAM98A|ATP7B|LIPE|HIST1H4F|GOT2|C3|PIN1|STYXL1|MBD4|MYOD1|RAF1|APOE|GFPT2|G6PC|CCNA1|KRAS|EIF2S1|CCNB1|PDGFRA|CDK4|MDM2|IGF2BP3|DERL1|PPP2R5A|PDGFRB|FLT4|SRCAP|MAP2K2|MAPK3|AKT3|KDR|LCAT|YWHAE|C…	202	681|663|739|655|239|773|809|1435|1301|1341|781|1237|1169|1097|1417|529|729|1353|835|841|1441|871|337|1291|437|377|429|1195|679|1427|1407|585|767|583|1303|759|1309|863|1131|737|1445|609|711|599|1281|241|1041|1519|475|671|317|765|685|509|1395|523|1101|861|1349|557|641|499|821|933|273|371|963|1001|1481|1161|1339|1365|633|1083|577|1493|1485|715|333|403|865|741|335|1095|1327|1023|381|979|1035|1283|969…	1.66e-34		GO:1901564	3299139982823808	0
5389	337	GO Biological Process		Negative regulation of biological process	1.95e-31	DVL2|PPP2R5B|C12orf5|PPP1R15A|CETP|APOH|MAPK1|NUTF2|CSK|AGO2|PLAT|PPP2CB|GCK|RPS6KB1|VTN|NFKB1|CCND1|APOC3|SKP1|IGFBP2|IGFBP5|ENO1|WDR77|APOA1|EGR1|TARDBP|HIST1H4F|C3|PIN1|STYXL1|YWHAH|MYOD1|FXR2|RAF1|APOE|PPFIA1|PPP1R1B|FUS|LGALS3|SCO1|KRAS|EIF2S1|MBD2|CCNB1|SORT1|PDGFRA|CDK4|PPP1R1A|MDM2|IGF2BP3|LRP6|PPP2R5A|IPO5|THOC1|SLC6A4|CDH1|PDGFRB|CILP|FLT4|RBL2|AXIN1|SRCAP|MAP2K2|SMG6|PAX8|AKT3|STRN|KDR…	202	431|663|1521|739|655|239|809|629|1237|1097|529|729|871|337|505|437|377|429|1195|1427|1407|767|1393|583|851|1107|1131|1445|609|711|831|1281|1249|241|1041|479|751|1199|1039|869|317|765|1113|685|1155|509|1395|1399|523|1101|1361|1349|461|783|843|271|557|251|641|1415|1383|499|821|1085|1527|273|793|371|957|1001|1481|1161|551|1365|633|1083|577|967|1223|1485|715|787|867|865|741|335|1095|1327|405|1035|969…	3.34e-34		GO:0048519	3.271e+16	0
5836	354	GO Biological Process		Regulation of nitrogen compound metabolic process	2.48e-31	DVL2|PPP2R5B|C12orf5|PPP1R15A|MAPK1|PAPOLA|CSK|AGO2|PLAT|GCK|RPS6KB1|VTN|NFKB1|CCND1|SKP1|PFKFB4|IGFBP5|PPP3R1|ENO1|WDR77|APOA1|EGR1|TARDBP|HIST1H4F|C3|SYMPK|PIN1|STYXL1|YWHAH|MYOD1|FXR2|RAF1|APOE|PPP1R1B|FUS|LGALS3|SCO1|CCNA1|KRAS|EIF2S1|MBD2|CCNB1|PDGFRA|CDK4|PPP1R1A|CCT7|MDM2|IGF2BP3|DERL1|LRP6|PPP2R5A|PPP2R3C|IPO5|THOC1|CDH1|PDGFRB|SNX1|FLT4|RBL2|AXIN1|SRCAP|MAP2K2|MAPK3|SMG6|PAX8|KDR|CTCF|YW…	202	431|663|1521|739|809|1513|1237|1097|529|871|337|505|437|377|1195|587|1407|585|767|1393|583|851|1107|1131|1445|1497|609|711|831|1281|1249|241|1041|751|1199|1039|869|671|317|765|1113|685|509|1395|1399|1311|523|1101|861|1361|1349|1379|461|783|271|557|289|641|1415|1383|499|821|933|1085|1527|371|957|1001|1481|1161|551|1365|633|1083|577|1223|1493|1485|715|787|867|865|741|335|979|1035|969|455|1459|775|6…	4.44e-34		GO:0051171	3.26055e+16	0
15024	625	GO Biological Process		Cellular process	2.56e-31	M6PR|DVL2|ST6GALNAC1|PPP2R5B|C12orf5|PPP1R15A|CETP|APOH|UNC13D|SF3A1|SNRPD3|MAPK1|MICALL1|PMM1|PAPOLA|CTSG|GZMH|GNPNAT1|MMP2|NUTF2|CSK|SCG3|AGO2|TG|PLAT|PPP2CB|FBL|SLC5A5|PON1|FKBP14|SNX8|GCK|RPS6KB1|VTN|ALDOC|NFKB1|CCND1|APOC3|SKP1|PFKFB4|APOB|SNX17|IGFBP2|IGFBP5|PPP3R1|ENO1|WDR77|APOA1|TTR|CPSF3|PAPOLG|FAM98A|EGR1|TARDBP|ATP7B|FAAH|LIPE|HIST1H4F|GOT2|C3|SYMPK|PIN1|STYXL1|YWHAH|STRIP2|MBD4|MYOD1…	202	1343|431|681|663|1521|739|655|239|1461|411|773|809|813|1435|1513|1301|1341|451|781|629|1237|1169|1097|1417|529|729|1353|835|841|1441|1025|871|337|505|1291|437|377|429|1195|587|679|573|1427|1407|585|767|1393|583|1303|1265|891|759|851|1107|1309|825|863|1131|737|1445|1497|609|711|831|481|599|1281|433|241|1041|1519|475|479|751|1199|1039|869|671|317|765|1113|685|1155|509|1395|1399|1311|523|1101|1359|8…	4.78e-34		GO:0009987	3259176003468815	0
1626	164	GO Biological Process		Regulation of phosphorylation	6.61e-31	DVL2|PPP2R5B|C12orf5|MAPK1|CSK|GCK|VTN|CCND1|PFKFB4|APOA1|EGR1|TARDBP|C3|PIN1|FXR2|RAF1|APOE|PPP1R1B|CCNA1|KRAS|CCNB1|PDGFRA|CDK4|LRP6|PPP2R5A|PPP2R3C|IPO5|PDGFRB|FLT4|RBL2|AXIN1|MAP2K2|MAPK3|KDR|FGF2|AMBP|EGF|HPX|ERBB3|RB1|TP53|ERBB2|IGFBP4|CCNA2|EGFR|FLT1|WNT3A|APP|FZD1|KIT|BRAF|ARAF|FGFR4|BAX|WNT1|LRP5|PLK1|IGFBP6|MAP2K1|IGF1|INSR|IRS1|YWHAG|F2|MID1|CLU|DVL3|MET|SH2D3C|PRMT5|MLXIPL|F2R|PPP2R1A…	202	431|663|1521|809|1237|871|505|377|587|583|851|1107|1445|609|1249|241|1041|751|671|317|685|509|1395|1361|1349|1379|461|557|641|1415|1383|821|933|371|1161|1083|577|1493|715|787|865|741|335|979|969|1387|265|361|503|723|1257|819|807|1403|675|445|299|1293|409|1473|983|453|895|579|1503|313|581|637|1247|941|683|1127|1163|1523|559|849|493|1389|329|1323|1297|1285|439|1151|713|989|569|591|521|1509|485|707|…	1.29e-33		GO:0042325	3.21798e+16	0
2741	222	Reactome Pathways		Signal Transduction	8.66e-31	DVL2|PPP2R5B|PPP1R15A|CETP|MAPK1|MMP2|CSK|AGO2|PLAT|PPP2CB|RPS6KB1|NFKB1|CCND1|APOC3|SKP1|APOB|PPP3R1|APOA1|TTR|EGR1|C3|PIN1|YWHAH|RAF1|APOE|PPP1R1B|KRAS|PDGFRA|CDK4|MDM2|LRP6|PPP2R5A|CDH1|PDGFRB|CILP|FLT4|AXIN1|MAP2K2|MAPK3|SGOL1|AKT3|STRN|KDR|YWHAE|CUL3|FGF2|EGF|SRF|ERBB3|TP53|ERBB2|RASA1|EGFR|MTA2|MYL9|FLT1|WNT3A|APP|RHOC|PPARG|FZD1|KIT|BRAF|ARAF|IGF2BP1|FGFR4|BAX|PSME3|WNT1|LRP5|PRKCI|IFT122|…	202	431|663|739|655|809|781|1237|1097|529|729|337|437|377|429|1195|679|585|583|1303|851|1445|609|831|241|1041|751|317|509|1395|523|1361|1349|271|557|251|641|1383|821|933|465|273|793|371|1001|1481|1161|577|1223|715|865|741|1035|969|1459|779|1387|265|361|279|459|503|723|1257|819|693|807|1403|229|675|445|303|1367|349|1105|1287|1021|299|409|1511|1473|983|545|453|895|301|839|619|579|281|855|1429|1495|1275…	7.97e-34		HSA-162582	3.20625e+16	0
5579	340	GO Biological Process		Positive regulation of cellular process	1.15e-29	DVL2|PPP2R5B|C12orf5|PPP1R15A|UNC13D|MAPK1|MMP2|NUTF2|CSK|AGO2|GCK|RPS6KB1|VTN|NFKB1|CCND1|SKP1|PFKFB4|APOB|IGFBP2|IGFBP5|PPP3R1|ENO1|WDR77|APOA1|FAM98A|EGR1|TARDBP|C3|SYMPK|PIN1|STYXL1|YWHAH|MYOD1|FXR2|SNX4|RAF1|APOE|FUS|LGALS3|KRAS|EIF2S1|MBD2|CCNB1|SORT1|PDGFRA|CDK4|CCT7|MDM2|DERL1|COX17|LRP6|PPP2R5A|PPP2R3C|IPO5|THOC1|SLC6A4|CDH1|PDGFRB|FLT4|RBL2|AXIN1|SRCAP|MAP2K2|MAPK3|PAX8|AKT3|KDR|CTCF|YW…	202	431|663|1521|739|1461|809|781|629|1237|1097|871|337|505|437|377|1195|587|679|1427|1407|585|767|1393|583|759|851|1107|1445|1497|609|711|831|1281|1249|433|241|1041|1199|1039|317|765|1113|685|1155|509|1395|1311|523|861|991|1361|1349|1379|461|783|843|271|557|641|1415|1383|499|821|933|1527|273|371|957|1001|1481|1161|551|1365|633|577|1223|1493|715|787|867|865|741|335|1023|979|1283|969|1279|455|1459|601…	2.32e-32		GO:0048522	3093930215964639	0
6112	360	GO Biological Process		Positive regulation of biological process	1.49e-29	DVL2|PPP2R5B|C12orf5|PPP1R15A|CETP|APOH|UNC13D|MAPK1|CTSG|MMP2|NUTF2|CSK|AGO2|PON1|GCK|RPS6KB1|VTN|NFKB1|CCND1|SKP1|PFKFB4|APOB|IGFBP2|IGFBP5|PPP3R1|ENO1|WDR77|APOA1|FAM98A|EGR1|TARDBP|C3|SYMPK|PIN1|STYXL1|YWHAH|MYOD1|FXR2|SNX4|RAF1|APOE|FUS|LGALS3|KRAS|EIF2S1|MBD2|CCNB1|SORT1|PDGFRA|CDK4|CCT7|MDM2|DERL1|COX17|LRP6|PPP2R5A|PPP2R3C|IPO5|THOC1|SLC6A4|CDH1|PDGFRB|SNX1|FLT4|RBL2|AXIN1|SRCAP|MAP2K2|MA…	202	431|663|1521|739|655|239|1461|809|1301|781|629|1237|1097|841|871|337|505|437|377|1195|587|679|1427|1407|585|767|1393|583|759|851|1107|1445|1497|609|711|831|1281|1249|433|241|1041|1199|1039|317|765|1113|685|1155|509|1395|1311|523|861|991|1361|1349|1379|461|783|843|271|557|289|641|1415|1383|499|821|933|1527|273|371|957|1001|1481|1161|551|1365|633|577|1223|1493|1485|715|787|867|865|741|335|1023|381|…	3.12e-32		GO:0048518	3.08268e+16	0
4251	284	GO Biological Process		Protein metabolic process	1.15e-28	ST6GALNAC1|PPP2R5B|PPP1R15A|APOH|SNRPD3|MAPK1|PMM1|CTSG|GZMH|MMP2|CSK|SCG3|AGO2|PLAT|PPP2CB|FBL|FKBP14|RPS6KB1|NFKB1|CCND1|APOC3|SKP1|APOB|IGFBP2|IGFBP5|PPP3R1|APOA1|TTR|FAM98A|ATP7B|LIPE|HIST1H4F|C3|PIN1|STYXL1|MYOD1|RAF1|APOE|GFPT2|CCNA1|KRAS|EIF2S1|CCNB1|PDGFRA|CDK4|MDM2|IGF2BP3|DERL1|PPP2R5A|PDGFRB|FLT4|SRCAP|MAP2K2|MAPK3|AKT3|KDR|LCAT|YWHAE|CUL3|FGF2|CP|PPP2R3A|RAB7A|AMBP|EGF|HPX|IDE|ERBB3|P…	202	681|663|739|239|773|809|1435|1301|1341|781|1237|1169|1097|529|729|1353|1441|337|437|377|429|1195|679|1427|1407|585|583|1303|759|1309|863|1131|1445|609|711|1281|241|1041|1519|671|317|765|685|509|1395|523|1101|861|1349|557|641|499|821|933|273|371|963|1001|1481|1161|1339|1365|633|1083|577|1493|1485|715|333|403|865|741|335|1327|1023|381|979|1035|969|1279|1459|775|1387|361|495|459|723|1257|819|395|807…	2.51e-31		GO:0019538	2993930215964639	0
3696	260	GO Biological Process		Cellular protein metabolic process	1.36e-28	ST6GALNAC1|PPP2R5B|PPP1R15A|SNRPD3|MAPK1|PMM1|CTSG|MMP2|CSK|SCG3|AGO2|PLAT|PPP2CB|FBL|FKBP14|RPS6KB1|NFKB1|CCND1|SKP1|APOB|IGFBP2|IGFBP5|PPP3R1|APOA1|TTR|FAM98A|LIPE|HIST1H4F|C3|PIN1|STYXL1|MYOD1|RAF1|APOE|GFPT2|CCNA1|KRAS|EIF2S1|CCNB1|PDGFRA|CDK4|MDM2|IGF2BP3|DERL1|PPP2R5A|PDGFRB|FLT4|SRCAP|MAP2K2|MAPK3|AKT3|KDR|YWHAE|CUL3|FGF2|CP|PPP2R3A|RAB7A|AMBP|EGF|IDE|ERBB3|PMM2|ASGR1|TP53|ERBB2|IGFBP4|CTT…	202	681|663|739|773|809|1435|1301|781|1237|1169|1097|529|729|1353|1441|337|437|377|1195|679|1427|1407|585|583|1303|759|863|1131|1445|609|711|1281|241|1041|1519|671|317|765|685|509|1395|523|1101|861|1349|557|641|499|821|933|273|371|1001|1481|1161|1339|1365|633|1083|577|1485|715|333|403|865|741|335|1327|1023|381|979|1035|969|1279|1459|775|1387|361|495|723|1257|819|395|807|229|675|1037|303|515|1313|1469…	3.06e-31		GO:0044267	2.98665e+16	0
5591	337	GO Biological Process		Localization	2.58e-28	M6PR|DVL2|PPP1R15A|CETP|APOH|UNC13D|SNRPD3|MAPK1|MICALL1|PMM1|CTSG|NUTF2|SCG3|TG|PLAT|FBL|SLC5A5|SNX8|GCK|RPS6KB1|VTN|ALDOC|NFKB1|CCND1|APOC3|SKP1|APOB|SNX17|PPP3R1|APOA1|TTR|CPSF3|FAM98A|ATP7B|GOT2|C3|SYMPK|YWHAH|STRIP2|SNX4|RAF1|APOE|G6PC|PPFIA1|LGALS3|SCO1|EIF2S1|CCNB1|SORT1|PDGFRA|CCT7|MDM2|IGF2BP3|SLC31A2|DERL1|DNAJC13|COX17|LRP6|IPO5|THOC1|SLC6A4|CDH1|PDGFRB|SLC30A4|SNX1|MAPK3|SMG6|KDR|LCAT…	202	1343|431|739|655|239|1461|773|809|813|1435|1301|629|1169|1417|529|1353|835|1025|871|337|505|1291|437|377|429|1195|679|573|585|583|1303|1265|759|1309|737|1445|1497|831|481|433|241|1041|475|479|1039|869|765|685|1155|509|1311|523|1101|1359|861|667|991|1361|461|783|843|271|557|375|289|933|1085|371|963|957|1001|1481|1161|1339|633|1083|577|1059|967|1223|1493|1485|1421|787|1543|333|1245|403|865|1095|527…	6.02e-31		GO:0051179	2958838029403677	0
4042	274	GO Biological Process		Regulation of biological quality	3.18e-28	CTTNBP2|PPP1R15A|CETP|APOH|MAPK1|CTSG|CSK|TG|PLAT|SLC5A5|MEST|GCK|VTN|NFKB1|CCND1|APOC3|SKP1|APOB|IGFBP5|PPP3R1|APOA1|TTR|EGR1|TARDBP|ATP7B|LIPE|HIST1H4F|GOT2|C3|PIN1|YWHAH|STRIP2|FXR2|SNX4|RAF1|APOE|G6PC|PPFIA1|PPP1R1B|FUS|SCO1|KRAS|PDGFRA|CDK4|CCT7|MDM2|IGF2BP3|SLC31A2|DERL1|LRP6|PPP2R3C|SLC6A4|PDGFRB|SLC30A4|MAPK3|SMG6|PAX8|KDR|LCAT|YWHAE|CUL3|FGF2|CP|RAB7A|TRPV5|SRF|HPX|IDE|RB1|TP53|PFKL|RAB5…	202	1137|739|655|239|809|1301|1237|1417|529|835|829|871|505|437|377|429|1195|679|1407|585|583|1303|851|1107|1309|863|1131|737|1445|609|831|481|1249|433|241|1041|475|479|751|1199|869|317|509|1395|1311|523|1101|1359|861|1361|1379|843|557|375|933|1085|1527|371|963|1001|1481|1161|1339|633|1059|1223|1493|1485|787|865|1095|1023|405|1035|969|455|779|601|265|361|769|661|1347|1261|459|503|723|693|727|807|567|…	7.68e-31		GO:0065008	2949757288001557	0
3011	228	GO Biological Process		Response to organic substance	3.99e-28	PPP2R5B|MAPK1|MICALL1|PMM1|CTSG|GNPNAT1|MMP2|CSK|SLC5A5|PON1|FKBP14|GCK|RPS6KB1|NFKB1|CCND1|SKP1|APOB|IGFBP2|IGFBP5|APOA1|EGR1|GOT2|YWHAH|MBD4|MYOD1|RAF1|GFPT2|G6PC|PPP1R1B|KRAS|EIF2S1|MBD2|CCNB1|SORT1|PDGFRA|CDK4|MDM2|DERL1|KHK|LRP6|LMNB1|IPO5|SLC6A4|CDH1|PDGFRB|CILP|FLT4|MAPK3|PAX8|KDR|CUL3|FGF2|DNMT3A|SRF|IDE|ERP27|RB1|SORD|TP53|ERBB2|PFKL|CCNA2|EGFR|IGFBP1|VPS26B|FLT1|WNT3A|APP|AKR1B1|PPARG|F…	202	663|809|813|1435|1301|451|781|1237|835|841|1441|871|337|437|377|1195|679|1427|1407|583|851|737|831|599|1281|241|1519|475|751|317|765|1113|685|1155|509|1395|523|861|425|1361|1259|461|843|271|557|251|641|933|1527|371|1481|1161|551|1223|1485|627|787|1543|865|741|1095|979|969|1279|1385|1387|265|361|769|459|853|723|727|807|1403|229|675|445|303|349|973|1473|341|983|545|453|895|301|1251|855|1429|1503|50…	9.95e-31		GO:0010033	2.9399e+16	0
4479	292	GO Biological Process		Establishment of localization	4.12e-28	M6PR|CETP|APOH|UNC13D|SNRPD3|MAPK1|MICALL1|PMM1|CTSG|NUTF2|SCG3|TG|SLC5A5|SNX8|GCK|RPS6KB1|VTN|ALDOC|NFKB1|CCND1|APOC3|APOB|SNX17|PPP3R1|APOA1|TTR|CPSF3|ATP7B|GOT2|C3|SYMPK|YWHAH|SNX4|RAF1|APOE|G6PC|PPFIA1|LGALS3|SCO1|EIF2S1|CCNB1|SORT1|CCT7|MDM2|IGF2BP3|SLC31A2|DERL1|DNAJC13|COX17|LRP6|IPO5|THOC1|SLC6A4|SLC30A4|SNX1|MAPK3|SMG6|LCAT|YWHAE|CUL3|FGF2|CP|RAB7A|AMBP|EGF|TRPV5|VDAC1|HPX|IDE|SNRPF|PMM2…	202	1343|655|239|1461|773|809|813|1435|1301|629|1169|1417|835|1025|871|337|505|1291|437|377|429|679|573|585|583|1303|1265|1309|737|1445|1497|831|433|241|1041|475|479|1039|869|765|685|1155|1311|523|1101|1359|861|667|991|1361|461|783|843|375|289|933|1085|963|1001|1481|1161|1339|633|1083|577|1059|967|1493|1485|1421|333|1245|403|865|1095|527|417|1023|405|969|975|601|1385|1173|265|361|495|661|1347|1261|45…	1.06e-30		GO:0051234	2.93851e+16	0
3893	267	GO Biological Process		Positive regulation of metabolic process	5.29e-28	DVL2|PPP2R5B|C12orf5|PPP1R15A|MAPK1|CSK|AGO2|GCK|RPS6KB1|VTN|NFKB1|CCND1|SKP1|PFKFB4|APOB|PPP3R1|ENO1|WDR77|APOA1|FAM98A|EGR1|TARDBP|C3|SYMPK|PIN1|YWHAH|MYOD1|FXR2|RAF1|APOE|FUS|KRAS|CCNB1|PDGFRA|CDK4|CCT7|MDM2|DERL1|COX17|LRP6|PPP2R5A|PPP2R3C|THOC1|SLC6A4|CDH1|PDGFRB|SNX1|FLT4|AXIN1|SRCAP|MAP2K2|MAPK3|PAX8|KDR|CTCF|CUL3|FGF2|PPP2R3A|RAB7A|EGF|SRF|HPX|IDE|ERBB3|RB1|NKD1|TP53|ERBB2|IGFBP4|PYURF|CC…	202	431|663|1521|739|809|1237|1097|871|337|505|437|377|1195|587|679|585|767|1393|583|759|851|1107|1445|1497|609|831|1281|1249|241|1041|1199|317|685|509|1395|1311|523|861|991|1361|1349|1379|783|843|271|557|289|641|1383|499|821|933|1527|371|957|1481|1161|1365|633|577|1223|1493|1485|715|787|867|865|741|335|381|979|969|455|1459|601|1387|265|361|1261|459|503|723|1257|819|693|727|807|1403|229|675|445|347|6…	1.4e-31		GO:0009893	2.92765e+16	0
120	48	KEGG Pathways		AMPK signaling pathway	1.05e-27	PPP2R5B|PPP2CB|RPS6KB1|CCND1|PFKFB4|LIPE|G6PC|CCNA1|PPP2R5A|PPP2R3C|AKT3|PPP2R3A|G6PC3|PFKL|CCNA2|PPARG|IGF1|INSR|IRS1|RPS6KB2|PPP2R1B|ULK1|PPP2R1A|PPP2R2A|PPP2R2C|PPP2R5E|EIF4EBP1|PFKM|MTOR|PFKFB2|IRS4|PFKFB1|FBP2|G6PC2|IRS2|PFKP|PPP2R3B|AKT2|PPP2R2B|INS|ELAVL1|PPP2R2D|FBP1|PPP2R5C|PPP2R5D|PPP2CA|PFKFB3|AKT1	202	663|729|337|377|587|863|475|671|1349|1379|273|1365|1245|1095|979|459|1473|983|453|619|1495|1433|1163|879|325|1389|901|1089|593|1319|719|1335|1255|897|1411|1535|1475|877|859|1457|413|845|647|799|1135|379|231|1231	6.26e-30		hsa04152	2897881070093006	0
1715	161	GO Biological Process		Positive regulation of protein metabolic process	5.89e-27	DVL2|PPP1R15A|MAPK1|CSK|RPS6KB1|VTN|CCND1|SKP1|ENO1|EGR1|C3|SYMPK|PIN1|FXR2|RAF1|APOE|KRAS|CCNB1|PDGFRA|CDK4|MDM2|DERL1|PPP2R5A|PPP2R3C|PDGFRB|SNX1|FLT4|AXIN1|MAP2K2|MAPK3|KDR|CUL3|FGF2|PPP2R3A|RAB7A|EGF|HPX|IDE|ERBB3|RB1|NKD1|TP53|ERBB2|IGFBP4|EGFR|FLT1|WNT3A|APP|PPARG|FZD1|KIT|BRAF|ARAF|FGFR4|BAX|PSME3|WNT1|VPS35|PLK1|IGFBP6|MAP2K1|IGF1|INSR|CYCS|COMMD1|RPS6KB2|F2|MAPK7|MID1|PABPC1|CLU|DVL3|SH2…	202	431|739|809|1237|337|505|377|1195|767|851|1445|1497|609|1249|241|1041|317|685|509|1395|523|861|1349|1379|557|289|641|1383|821|933|371|1481|1161|1365|633|577|1493|1485|715|787|867|865|741|335|969|1387|265|361|459|503|723|1257|819|807|1403|229|675|1021|299|1293|409|1473|983|873|1191|619|579|1429|1503|513|313|581|1247|1127|1177|1523|849|493|915|329|1323|1297|1285|1151|989|521|1509|707|393|275|397|14…	1.6e-30		GO:0051247	282298847052129	0
517	85	KEGG Pathways		Pathways in cancer	7.75e-27	DVL2|MAPK1|MMP2|RPS6KB1|NFKB1|CCND1|SKP1|RAF1|CCNA1|KRAS|PDGFRA|CDK4|MDM2|LRP6|CDH1|PDGFRB|FLT4|AXIN1|MAP2K2|MAPK3|PAX8|AKT3|FGF2|EGF|RB1|TP53|ERBB2|CCNA2|EGFR|WNT3A|PPARG|FZD1|KIT|BRAF|ARAF|FGFR4|BAX|WNT1|LRP5|MAP2K1|IGF1|CTNNA1|CXCL8|CYCS|RPS6KB2|F2|PPARD|KLK3|DVL3|MET|F2R|MMP1|FZD2|GSK3B|CUL1|FGFR3|WNT8B|CTNNB1|MAX|TGFBR2|MTOR|NRAS|FRAT2|FRAT1|HDAC1|AR|DVL1|AKT2|GRB2|BAD|BCL2|RELA|IGF2|FGFR1|R…	202	431|809|781|337|437|377|1195|241|671|317|509|1395|523|1361|271|557|641|1383|821|933|1527|273|1161|577|787|865|741|979|969|265|459|503|723|1257|819|807|1403|675|445|409|1473|545|301|873|619|579|855|257|581|637|1127|997|817|1177|925|1323|245|989|747|1487|593|1451|311|321|651|1197|1211|877|1271|1043|749|389|401|1123|1157|277|497|977|243|537|1207|421|467|1231|391	6.92e-29		hsa05200	2811069829749369	0
144	50	KEGG Pathways		Gastric cancer	7.75e-27	DVL2|MAPK1|RPS6KB1|CCND1|RAF1|KRAS|LRP6|CDH1|AXIN1|MAP2K2|MAPK3|AKT3|FGF2|EGF|RB1|TP53|ERBB2|EGFR|WNT3A|FZD1|BRAF|ARAF|BAX|WNT1|LRP5|MAP2K1|CTNNA1|RPS6KB2|DVL3|MET|FZD2|GSK3B|WNT8B|CTNNB1|TGFBR2|MTOR|NRAS|FRAT2|FRAT1|DVL1|AKT2|GRB2|BCL2|SHC1|HRAS|FGFR2|RXRA|WNT8A|AKT1|MYC	202	431|809|337|377|241|317|1361|271|1383|821|933|273|1161|577|787|865|741|969|265|503|1257|819|1403|675|445|409|545|619|581|637|817|1177|245|989|1487|593|1451|311|321|1211|877|1271|749|803|277|977|537|1207|1231|391	7.25e-29		hsa05226	2811069829749369	0
1164	129	GO Biological Process		Positive regulation of phosphate metabolic process	1.28e-26	DVL2|C12orf5|PPP1R15A|MAPK1|CSK|VTN|CCND1|PFKFB4|ENO1|EGR1|C3|SYMPK|PIN1|FXR2|RAF1|APOE|KRAS|CCNB1|PDGFRA|PPP2R5A|PPP2R3C|PDGFRB|FLT4|AXIN1|MAP2K2|MAPK3|KDR|FGF2|EGF|HPX|ERBB3|TP53|ERBB2|IGFBP4|EGFR|FLT1|WNT3A|APP|FZD1|KIT|BRAF|ARAF|FGFR4|WNT1|PLK1|IGFBP6|MAP2K1|IGF1|INSR|IRS1|F2|MID1|CLU|DVL3|MET|SH2D3C|MLXIPL|F2R|STK25|CALCA|HDAC6|PLAUR|FGFR3|MAPT|PTPN11|ERBB4|CTNNB1|ANXA2|FYN|FXR1|ANKLE2|VCP|T…	202	431|1521|739|809|1237|505|377|587|767|851|1445|1497|609|1249|241|1041|317|685|509|1349|1379|557|641|1383|821|933|371|1161|577|1493|715|865|741|335|969|1387|265|361|503|723|1257|819|807|675|299|1293|409|1473|983|453|579|1503|313|581|637|1247|683|1127|1523|849|493|329|1323|1297|1285|1151|989|521|1509|707|393|397|1487|605|593|827|1319|1369|1233|407|945|951|815|1031|1197|1335|247|1253|415|1211|1215|1…	3.59e-29		GO:0045937	2789279003035213	0
1459	146	GO Biological Process		Regulation of protein phosphorylation	1.53e-26	DVL2|PPP2R5B|MAPK1|CSK|VTN|CCND1|APOA1|EGR1|TARDBP|C3|PIN1|FXR2|RAF1|APOE|PPP1R1B|CCNA1|KRAS|CCNB1|PDGFRA|CDK4|LRP6|PPP2R5A|PPP2R3C|IPO5|PDGFRB|FLT4|AXIN1|MAP2K2|MAPK3|KDR|FGF2|AMBP|EGF|HPX|ERBB3|RB1|TP53|ERBB2|IGFBP4|CCNA2|EGFR|FLT1|WNT3A|APP|FZD1|KIT|BRAF|ARAF|FGFR4|BAX|WNT1|LRP5|PLK1|IGFBP6|MAP2K1|IGF1|INSR|YWHAG|F2|MID1|CLU|DVL3|SH2D3C|PRMT5|MLXIPL|F2R|PPP2R1A|STK25|HGS|CALCA|HDAC6|PPP2R5E|PL…	202	431|663|809|1237|505|377|583|851|1107|1445|609|1249|241|1041|751|671|317|685|509|1395|1361|1349|1379|461|557|641|1383|821|933|371|1161|1083|577|1493|715|787|865|741|335|979|969|1387|265|361|503|723|1257|819|807|1403|675|445|299|1293|409|1473|983|895|579|1503|313|581|1247|941|683|1127|1163|1523|559|849|493|1389|329|1323|1285|439|1151|713|989|569|521|1509|485|707|1487|605|593|1061|907|699|827|1369|…	4.51e-29		GO:0001932	2.78153e+16	0
135	49	GO Biological Process		Regulation of protein dephosphorylation	1.78e-26	PPP2R5B|PPP1R15A|SYMPK|PIN1|STYXL1|PPP1R1B|LGALS3|PPP1R1A|PPP2R5A|PDGFRB|YWHAE|PPP2R3A|PPP4R4|PPP2R1B|PPP2R1A|GSK3B|PPP2R2A|PPP2R2C|PPP2R5E|PPP1R17|ENSA|PPP4R2|ANKLE2|MTOR|PPP1R15B|TIPRL|SHOC2|SET|YWHAB|IGBP1|MASTL|PPP1R10|FKBP1B|IGFBP3|PPP2R3B|PPP6R3|PPP2R2B|PPME1|FKBP1A|PPP4R1|PPP1R12A|PPP2R2D|CNEP1R1|PPP2R5C|PPP6R1|PPP2R5D|ARPP19|PPP6R2|PPP1R9B	202	663|739|1497|609|711|751|1039|1399|1349|557|1001|1365|1491|1495|1163|1177|879|325|1389|717|355|307|393|593|1369|811|1325|563|923|889|1295|539|643|1229|1475|1515|859|1079|743|1067|1055|845|1121|799|1193|1135|547|261|385	5.42e-29		GO:0035304	2.77496e+16	0
3413	242	GO Biological Process		Positive regulation of cellular metabolic process	2.19e-26	DVL2|PPP2R5B|C12orf5|PPP1R15A|MAPK1|CSK|AGO2|GCK|RPS6KB1|VTN|NFKB1|CCND1|SKP1|PFKFB4|PPP3R1|ENO1|WDR77|APOA1|EGR1|TARDBP|C3|SYMPK|PIN1|YWHAH|MYOD1|FXR2|RAF1|APOE|FUS|KRAS|CCNB1|PDGFRA|CDK4|CCT7|MDM2|DERL1|COX17|LRP6|PPP2R5A|PPP2R3C|THOC1|CDH1|PDGFRB|FLT4|AXIN1|SRCAP|MAP2K2|MAPK3|PAX8|KDR|CTCF|CUL3|FGF2|EGF|SRF|HPX|ERBB3|RB1|TP53|ERBB2|IGFBP4|CCNA2|EGFR|CCT6A|MTA2|CCT5|FLT1|WNT3A|APP|CCT8|PPARG|FZ…	202	431|663|1521|739|809|1237|1097|871|337|505|437|377|1195|587|585|767|1393|583|851|1107|1445|1497|609|831|1281|1249|241|1041|1199|317|685|509|1395|1311|523|861|991|1361|1349|1379|783|271|557|641|1383|499|821|933|1527|371|957|1481|1161|577|1223|1493|715|787|865|741|335|979|969|455|1459|601|1387|265|361|1261|459|503|723|1257|819|727|807|1403|229|675|445|347|631|349|1021|1075|299|1293|409|1473|983|453…	6.83e-29		GO:0031325	2.76596e+16	0
325	68	KEGG Pathways		Human papillomavirus infection	2.43e-26	DVL2|PPP2R5B|MAPK1|PPP2CB|RPS6KB1|VTN|NFKB1|CCND1|RAF1|CCNA1|KRAS|CDK4|MDM2|PPP2R5A|PPP2R3C|PDGFRB|RBL2|AXIN1|MAP2K2|MAPK3|AKT3|PPP2R3A|EGF|RB1|TP53|CCNA2|EGFR|WNT3A|FZD1|BAX|WNT1|PRKCI|MAP2K1|RPS6KB2|PPP2R1B|DVL3|PKM|FZD2|PPP2R1A|GSK3B|PPP2R2A|ATP6V0A2|PPP2R2C|PPP2R5E|WNT8B|EIF4EBP1|CTNNB1|CHD4|MTOR|NRAS|HDAC1|RBL1|PRKCZ|DVL1|PPP2R3B|AKT2|GRB2|PPP2R2B|BAD|RELA|PPP2R2D|HRAS|PPP2R5C|PPP2R5D|PPP2CA…	202	431|663|809|729|337|505|437|377|241|671|317|1395|523|1349|1379|557|1415|1383|821|933|273|1365|577|787|865|979|969|265|503|1403|675|303|409|619|1495|581|1471|817|1163|1177|879|949|325|1389|245|901|989|1351|593|1451|651|657|415|1211|1475|877|1271|859|1043|389|845|277|799|1135|379|1207|421|1231	3.62e-28		hsa05165	2.76144e+16	0
4353	282	GO Biological Process		Transport	2.95e-26	M6PR|CETP|APOH|UNC13D|SNRPD3|MAPK1|MICALL1|PMM1|CTSG|NUTF2|SCG3|TG|SLC5A5|SNX8|GCK|RPS6KB1|VTN|ALDOC|NFKB1|CCND1|APOC3|APOB|SNX17|PPP3R1|APOA1|TTR|CPSF3|ATP7B|GOT2|C3|SYMPK|YWHAH|SNX4|RAF1|APOE|G6PC|PPFIA1|LGALS3|SCO1|EIF2S1|SORT1|CCT7|IGF2BP3|SLC31A2|DERL1|DNAJC13|COX17|LRP6|IPO5|THOC1|SLC6A4|SLC30A4|SNX1|MAPK3|SMG6|LCAT|YWHAE|CUL3|FGF2|CP|RAB7A|AMBP|EGF|TRPV5|VDAC1|HPX|IDE|SNRPF|PMM2|G6PC3|ASGR…	202	1343|655|239|1461|773|809|813|1435|1301|629|1169|1417|835|1025|871|337|505|1291|437|377|429|679|573|585|583|1303|1265|1309|737|1445|1497|831|433|241|1041|475|479|1039|869|765|1155|1311|1101|1359|861|667|991|1361|461|783|843|375|289|933|1085|963|1001|1481|1161|1339|633|1083|577|1059|967|1493|1485|1421|333|1245|403|865|1095|527|417|1023|405|975|601|1385|1173|265|361|495|661|1347|1261|459|723|693|72…	9.41e-29		GO:0006810	2.75302e+16	0
1036	120	GO Biological Process		Regulation of transferase activity	4.97e-26	DVL2|C12orf5|MAPK1|CSK|CCND1|SKP1|EGR1|PIN1|RAF1|APOE|PPP1R1B|CCNA1|KRAS|CCNB1|PDGFRA|CDK4|LRP6|PPP2R5A|PPP2R3C|IPO5|PDGFRB|FLT4|RBL2|AXIN1|MAP2K2|MAPK3|SMG6|KDR|FGF2|EGF|ERBB3|RB1|TP53|ERBB2|CCNA2|EGFR|FLT1|WNT3A|APP|PPARG|KIT|BRAF|FGFR4|LRP5|CCT2|PLK1|IGFBP6|MAP2K1|IGF1|INSR|IRS1|YWHAG|F2|CLU|DVL3|MET|TCP1|F2R|PPP2R1A|GSK3B|STK25|HGS|CALCA|FGFR3|MAPT|PTPN11|SFN|ERBB4|CTNNB1|CCNG1|FYN|TGFBR2|MTO…	202	431|1521|809|1237|377|1195|851|609|241|1041|751|671|317|685|509|1395|1361|1349|1379|461|557|641|1415|1383|821|933|1085|371|1161|577|715|787|865|741|979|969|1387|265|361|459|723|1257|807|445|1075|299|1293|409|1473|983|453|895|579|313|581|637|911|1127|1163|1177|1523|559|849|1323|1297|1285|439|1151|989|569|1509|1487|593|1061|907|699|1319|407|945|625|815|657|1335|1411|1295|247|1253|415|1211|1215|735|…	1.62e-28		GO:0051338	2730364361126667	0
2402	193	GO Biological Process		Regulation of cellular component organization	1.53e-25	DVL2|CTTNBP2|PPP2R5B|C12orf5|PPP1R15A|MAPK1|VTN|APOC3|SNX17|IGFBP5|PPP3R1|ENO1|APOA1|FAM98A|C3|PIN1|STYXL1|YWHAH|MYOD1|FXR2|RAF1|APOE|PPFIA1|LGALS3|CCNB1|PDGFRA|CCT7|MDM2|PDGFRB|MAP2K2|MAPK3|SMG6|KDR|LCAT|CTCF|YWHAE|CUL3|RAB7A|EGF|VDAC1|SRF|RB1|TP53|ERBB2|IGFBP4|RAB5A|RASA1|EGFR|IGFBP1|CCT6A|CCT5|WNT3A|APP|RHOC|WHAMM|CCT8|PPARG|FZD1|KIT|HK2|FGFR4|BAX|WNT1|LRP5|CCT3|PRKCI|RAD21|VPS35|CCT2|PLK1|MAP…	202	431|1137|663|1521|739|809|505|429|573|1407|585|767|583|759|1445|609|711|831|1281|1249|241|1041|479|1039|685|509|1311|523|557|821|933|1085|371|963|957|1001|1481|633|577|967|1223|787|865|741|335|1023|1035|969|1279|455|601|265|361|279|1347|1261|459|503|723|727|807|1403|675|445|347|303|1287|1021|1075|299|409|1511|1473|983|895|579|855|1503|313|581|637|911|1181|941|997|1263|1433|1163|1177|1523|449|493|…	5.14e-28		GO:0051128	2.68153e+16	0
3063	224	GO Biological Process		Cellular protein modification process	1.76e-25	ST6GALNAC1|PPP2R5B|PPP1R15A|SNRPD3|MAPK1|PMM1|CTSG|CSK|SCG3|PLAT|PPP2CB|FBL|FKBP14|RPS6KB1|NFKB1|CCND1|SKP1|APOB|IGFBP5|PPP3R1|APOA1|FAM98A|LIPE|C3|PIN1|STYXL1|MYOD1|RAF1|APOE|GFPT2|CCNA1|KRAS|EIF2S1|CCNB1|PDGFRA|CDK4|MDM2|DERL1|PPP2R5A|PDGFRB|FLT4|SRCAP|MAP2K2|MAPK3|AKT3|KDR|YWHAE|CUL3|FGF2|CP|PPP2R3A|AMBP|EGF|ERBB3|PMM2|ASGR1|TP53|ERBB2|IGFBP4|CTTNBP2NL|RAB5A|PYURF|CCNA2|RASA1|EGFR|IGFBP1|MTA2|…	202	681|663|739|773|809|1435|1301|1237|1169|529|729|1353|1441|337|437|377|1195|679|1407|585|583|759|863|1445|609|711|1281|241|1041|1519|671|317|765|685|509|1395|523|861|1349|557|641|499|821|933|273|371|1001|1481|1161|1339|1365|1083|577|715|333|403|865|741|335|1327|1023|381|979|1035|969|1279|1459|775|1387|361|723|1257|819|395|807|229|303|515|1313|299|409|1511|1473|983|323|453|873|1191|619|235|1429|149…	6.04e-28		GO:0006464	2675448733218585	0
1548	149	Reactome Pathways		Disease	3.33e-25	DVL2|PPP2R5B|MAPK1|CTSG|CSK|PPP2CB|SLC5A5|GCK|NFKB1|CCND1|FGFR1OP2|SKP1|ENO1|APOA1|TTR|C3|RAF1|G6PC|KRAS|PDGFRA|CDK4|MDM2|DERL1|KHK|LRP6|LMNB1|PPP2R5A|IPO5|CDH1|PDGFRB|AXIN1|MAP2K2|MAPK3|AKT3|STRN|KDR|LCT|YWHAE|SI|FGF2|CP|RAB7A|EGF|ERBB3|RB1|PMM2|G6PC3|ERBB2|RAB5A|EGFR|MTA2|WNT3A|APP|KIT|BRAF|ARAF|FGFR4|PSME3|LRP5|HIST1H2AA|MAP2K1|GUSB|IRS1|GLB1|RPS6KB2|F2|BANF1|PPP2R1B|VAMP2|DVL3|SUZ12|MET|MPI|T…	202	431|663|809|1301|1237|729|835|871|437|377|1125|1195|767|583|1303|1445|241|475|317|509|1395|523|861|425|1361|1259|1349|461|271|557|1383|821|933|273|793|371|1087|1001|1149|1161|1339|633|577|715|787|333|1245|741|1023|969|1459|265|361|723|1257|819|807|229|445|1103|409|1051|453|1251|619|579|1423|1495|501|581|285|637|771|1483|1163|1177|925|789|559|849|1391|493|1545|1389|915|1323|1285|931|881|1151|989|1…	4.59e-28		HSA-1643685	2647755576649368	0
145	48	KEGG Pathways		Breast cancer	3.71e-25	DVL2|MAPK1|RPS6KB1|CCND1|RAF1|KRAS|CDK4|LRP6|FLT4|AXIN1|MAP2K2|MAPK3|AKT3|FGF2|EGF|RB1|TP53|ERBB2|EGFR|WNT3A|FZD1|KIT|BRAF|ARAF|BAX|WNT1|LRP5|MAP2K1|IGF1|RPS6KB2|DVL3|FZD2|GSK3B|WNT8B|CTNNB1|MTOR|NRAS|FRAT2|FRAT1|DVL1|AKT2|GRB2|FGFR1|SHC1|HRAS|WNT8A|AKT1|MYC	202	431|809|337|377|241|317|1395|1361|641|1383|821|933|273|1161|577|787|865|741|969|265|503|723|1257|819|1403|675|445|409|1473|619|581|817|1177|245|989|593|1451|311|321|1211|877|1271|1123|803|277|1207|1231|391	6.63e-27		hsa05224	2.64306e+16	0
1635	152	GO Biological Process		Positive regulation of cellular protein metabolic process	9.55e-25	DVL2|PPP1R15A|MAPK1|CSK|RPS6KB1|VTN|CCND1|SKP1|ENO1|EGR1|C3|SYMPK|PIN1|FXR2|RAF1|APOE|KRAS|CCNB1|PDGFRA|CDK4|MDM2|DERL1|PPP2R5A|PPP2R3C|PDGFRB|FLT4|AXIN1|MAP2K2|MAPK3|KDR|CUL3|FGF2|EGF|HPX|ERBB3|RB1|TP53|ERBB2|IGFBP4|EGFR|FLT1|WNT3A|APP|PPARG|FZD1|KIT|BRAF|ARAF|FGFR4|BAX|PSME3|WNT1|VPS35|PLK1|IGFBP6|MAP2K1|IGF1|INSR|CYCS|COMMD1|RPS6KB2|F2|MID1|PABPC1|CLU|DVL3|SH2D3C|F2R|GSK3B|STK25|CALCA|HDAC6|LC…	202	431|739|809|1237|337|505|377|1195|767|851|1445|1497|609|1249|241|1041|317|685|509|1395|523|861|1349|1379|557|641|1383|821|933|371|1481|1161|577|1493|715|787|865|741|335|969|1387|265|361|459|503|723|1257|819|807|1403|229|675|1021|299|1293|409|1473|983|873|1191|619|579|1503|513|313|581|1247|1127|1177|1523|849|493|915|329|1323|1297|1285|1151|989|521|1509|707|393|275|397|1487|605|593|699|827|1369|519…	3.42e-27		GO:0032270	2.602e+16	0
69	37	KEGG Pathways		Central carbon metabolism in cancer	1.01e-24	C12orf5|MAPK1|GCK|RAF1|KRAS|PDGFRA|PDGFRB|MAP2K2|MAPK3|AKT3|TP53|ERBB2|PFKL|EGFR|KIT|HK2|HK3|MAP2K1|MET|PKM|FGFR3|PFKM|HKDC1|MTOR|NRAS|PFKP|AKT2|G6PD|FGFR1|HK1|HRAS|FGFR2|SLC2A1|NTRK1|LDHA|AKT1|MYC	202	1521|809|871|241|317|509|557|821|933|273|865|741|1095|969|723|727|567|409|637|1471|1323|1089|993|593|1451|1535|877|1045|1123|1219|277|977|243|467|971|1231|391	2.1e-27		hsa05230	2599567862621736	0
113	44	GO Biological Process		Regulation of phosphoprotein phosphatase activity	1.59e-24	PPP2R5B|PPP1R15A|STYXL1|PPP1R1B|LGALS3|PPP1R1A|PPP2R5A|PDGFRB|PPP2R3A|PPP4R4|PPP2R1B|PPP2R1A|GSK3B|PPP2R2A|PPP2R2C|PPP2R5E|PPP1R17|ENSA|PPP4R2|ANKLE2|MTOR|PPP1R15B|TIPRL|SHOC2|SET|IGBP1|MASTL|PPP1R10|FKBP1B|IGFBP3|PPP2R3B|PPP6R3|PPP2R2B|PPME1|FKBP1A|PPP4R1|PPP1R12A|PPP2R2D|PPP2R5C|PPP6R1|PPP2R5D|ARPP19|PPP6R2|PPP1R9B	202	663|739|711|751|1039|1399|1349|557|1365|1491|1495|1163|1177|879|325|1389|717|355|307|393|593|1369|811|1325|563|889|1295|539|643|1229|1475|1515|859|1079|743|1067|1055|845|799|1193|1135|547|261|385	5.8e-28		GO:0043666	2579860287567955	0
1842	162	GO Biological Process		Positive regulation of molecular function	2.71e-24	DVL2|PPP2R5B|C12orf5|PPP1R15A|APOH|MAPK1|CSK|PPP2CB|PON1|VTN|NFKB1|CCND1|SKP1|APOA1|EGR1|PIN1|RAF1|APOE|KRAS|EIF2S1|MBD2|CCNB1|PDGFRA|DERL1|COX17|LRP6|PPP2R5A|PPP2R3C|PDGFRB|FLT4|AXIN1|MAP2K2|MAPK3|KDR|FGF2|EGF|SRF|IDE|ERBB3|RB1|ERBB2|RASA1|EGFR|FLT1|WNT3A|APP|RHOC|PPARG|FZD1|KIT|BRAF|FGFR4|BAX|PSME3|WNT1|LRP5|PRKCI|FABP1|CCT2|PLK1|IGFBP6|MAP2K1|IGF1|INSR|IRS1|CYCS|F2|CLU|DVL3|MET|TCP1|F2R|TRIM25…	202	431|663|1521|739|239|809|1237|729|841|505|437|377|1195|583|851|609|241|1041|317|765|1113|685|509|861|991|1361|1349|1379|557|641|1383|821|933|371|1161|577|1223|1485|715|787|741|1035|969|1387|265|361|279|459|503|723|1257|807|1403|229|675|445|303|631|1075|299|1293|409|1473|983|453|873|579|313|581|637|911|1127|1057|817|1177|1523|849|1463|1389|915|329|1323|1297|1285|1151|989|591|521|1509|463|397|1487|…	1.01e-26		GO:0044093	2556703070912559	0
1567	147	GO Biological Process		Response to oxygen-containing compound	3.99e-24	MAPK1|CTSG|MMP2|CSK|PPP2CB|SLC5A5|PON1|GCK|RPS6KB1|NFKB1|CCND1|APOB|IGFBP2|IGFBP5|EGR1|GOT2|MBD4|MYOD1|RAF1|APOE|G6PC|PPP1R1B|MBD2|CCNB1|SORT1|PDGFRA|CDK4|MDM2|KHK|LRP6|IPO5|SLC6A4|CDH1|PDGFRB|MAPK3|DNMT3A|SRF|IDE|TP53|PFKL|CCNA2|EGFR|IGFBP1|WNT3A|APP|AKR1B1|PPARG|FUK|WNT1|LRP5|PRKCI|FABP1|H2AFZ|IGF1|INSR|CTNNA1|IRS1|YWHAG|CXCL8|GLB1|PPARD|MAPK7|VAMP2|PKM|MLXIPL|F2R|TRIM25|GSK3B|STK25|ATP6V0A2|HD…	202	809|1301|781|1237|729|835|841|871|337|437|377|679|1427|1407|851|737|599|1281|241|1041|475|751|1113|685|1155|509|1395|523|425|1361|461|843|271|557|933|551|1223|1485|865|1095|979|969|1279|265|361|769|459|853|675|445|303|631|349|1473|983|545|453|895|301|1251|855|1429|501|1471|683|1127|1057|1177|1523|949|493|1463|1419|245|901|1297|355|989|591|1509|875|483|613|463|747|397|1487|733|593|1061|699|1319|13…	1.52e-26		GO:1901700	2539902710431325	0
157	49	GO Biological Process		Hexose metabolic process	4.13e-24	PMM1|GCK|ALDOC|PFKFB4|ENO1|GOT2|G6PC|KHK|SORD|PMM2|G6PC3|PFKL|GALM|AKR1B1|HK2|HK3|LRP5|FABP5|GLB1|PPARD|ADPGK|MPI|PKM|ENO3|PKLR|PFKM|HKDC1|PFKFB2|TKTL1|PGM1|PFKFB1|FBP2|G6PC2|IRS2|PFKP|PGM2|AKT2|G6PD|BAD|INS|GLYCTK|IGF2|HK1|GPI|FBP1|ENO2|PFKFB3|AKT1|H6PD	202	1435|871|1291|587|767|737|475|425|1543|333|1245|1095|1289|769|727|567|445|1105|1251|855|1273|771|1471|1263|1419|1089|993|1319|1183|757|1335|1255|897|1411|1535|801|877|1045|1043|1457|995|401|1219|1541|647|1109|231|1231|1331	1.61e-26		GO:0019318	2.5384e+16	0
133	45	KEGG Pathways		Insulin signaling pathway	7.2e-25	MAPK1|GCK|RPS6KB1|LIPE|RAF1|G6PC|KRAS|MAP2K2|MAPK3|AKT3|G6PC3|PPP1R3A|BRAF|ARAF|HK2|HK3|PRKCI|MAP2K1|INSR|IRS1|RPS6KB2|GSK3B|PPP1CA|PKLR|EIF4EBP1|PPP1CC|HKDC1|MTOR|NRAS|MKNK1|IRS4|FBP2|G6PC2|IRS2|PRKCZ|AKT2|GRB2|BAD|PPP1CB|INS|SHC1|HK1|HRAS|FBP1|AKT1	202	809|871|337|863|241|475|317|821|933|273|1245|777|1257|819|727|567|303|409|983|453|619|1177|837|1419|901|881|993|593|1451|249|719|1255|897|1411|415|877|1271|1043|1277|1457|803|1219|277|647|1231	1.71e-25		hsa04910	2514266750356873	0
205	54	GO Biological Process		Regulation of dephosphorylation	7.3e-25	PPP2R5B|PPP1R15A|SYMPK|PIN1|STYXL1|PPP1R1B|LGALS3|PPP1R1A|PPP2R5A|PPP2R3C|PDGFRB|SMG6|YWHAE|PPP2R3A|PPP4R4|PPP2R1B|PPP2R1A|GSK3B|PPP2R2A|PPP2R2C|PPP2R5E|PPP1R17|ENSA|PPP4R2|ANKLE2|MTOR|SMG5|PPP1R15B|TIPRL|SHOC2|SET|YWHAB|SRC|IGBP1|MASTL|PPP1R10|FKBP1B|IGFBP3|PPP2R3B|PPP6R3|PPP2R2B|PPME1|FKBP1A|PPP4R1|PPP1R12A|PPP2R2D|CNEP1R1|PPP2R5C|PPP6R1|PPP2R5D|SMG7|ARPP19|PPP6R2|PPP1R9B	202	663|739|1497|609|711|751|1039|1399|1349|1379|557|1085|1001|1365|1491|1495|1163|1177|879|325|1389|717|355|307|393|593|1505|1369|811|1325|563|923|815|889|1295|539|643|1229|1475|1515|859|1079|743|1067|1055|845|1121|799|1193|1135|1413|547|261|385	2.9e-27		GO:0035303	2.51367e+16	0
160	48	KEGG Pathways		Hepatocellular carcinoma	9.44e-24	DVL2|MAPK1|RPS6KB1|CCND1|RAF1|KRAS|CDK4|LRP6|AXIN1|MAP2K2|MAPK3|AKT3|RB1|TP53|EGFR|WNT3A|FZD1|BRAF|ARAF|BAX|WNT1|LRP5|MAP2K1|RPS6KB2|DVL3|MET|FZD2|GSK3B|WNT8B|CTNNB1|TGFBR2|MTOR|NRAS|FRAT2|FRAT1|DVL1|AKT2|GRB2|BAD|PBRM1|IGF2|SMARCA4|SHC1|HRAS|PRKCA|WNT8A|AKT1|MYC	202	431|809|337|377|241|317|1395|1361|1383|821|933|273|787|865|969|265|503|1257|819|1403|675|445|409|619|581|637|817|1177|245|989|1487|593|1451|311|321|1211|877|1271|1043|1357|401|635|803|277|497|1207|1231|391	2.53e-25		hsa05225	2502502800570193	0
12171	541	GO Biological Process		Biological regulation	1.21e-23	DVL2|CTTNBP2|PPP2R5B|C12orf5|PPP1R15A|CETP|APOH|UNC13D|MAPK1|PAPOLA|CTSG|GZMH|MMP2|NUTF2|CSK|AGO2|TG|PLAT|PPP2CB|SLC5A5|PON1|FKBP14|MEST|GCK|RPS6KB1|VTN|NFKB1|CCND1|APOC3|SKP1|PFKFB4|APOB|SNX17|IGFBP2|IGFBP5|PPP3R1|ENO1|WDR77|APOA1|TTR|FAM98A|EGR1|TARDBP|ATP7B|LIPE|HIST1H4F|GOT2|C3|SYMPK|PIN1|STYXL1|YWHAH|STRIP2|MYOD1|FXR2|SNX4|RAF1|APOE|G6PC|PPFIA1|PPP1R1B|FUS|LGALS3|SCO1|CCNA1|KRAS|EIF2S1|MBD2|…	202	431|1137|663|1521|739|655|239|1461|809|1513|1301|1341|781|629|1237|1097|1417|529|729|835|841|1441|829|871|337|505|437|377|429|1195|587|679|573|1427|1407|585|767|1393|583|1303|759|851|1107|1309|863|1131|737|1445|1497|609|711|831|481|1281|1249|433|241|1041|475|479|751|1199|1039|869|671|317|765|1113|685|1155|509|1395|1399|1311|523|1101|1359|861|425|667|991|1361|1259|1349|1379|461|783|843|271|557|375…	4.91e-26		GO:0065007	2491721462968355	0
3277	229	GO Biological Process		Macromolecule modification	1.26e-23	ST6GALNAC1|PPP2R5B|PPP1R15A|SNRPD3|MAPK1|PMM1|CTSG|CSK|SCG3|PLAT|PPP2CB|FBL|FKBP14|RPS6KB1|NFKB1|CCND1|SKP1|APOB|IGFBP5|PPP3R1|APOA1|FAM98A|LIPE|C3|PIN1|STYXL1|MBD4|MYOD1|RAF1|APOE|GFPT2|CCNA1|KRAS|EIF2S1|MBD2|CCNB1|PDGFRA|CDK4|MDM2|DERL1|PPP2R5A|PDGFRB|FLT4|SRCAP|MAP2K2|MAPK3|AKT3|KDR|CTCF|YWHAE|CUL3|FGF2|CP|DNMT3A|PPP2R3A|AMBP|EGF|ERBB3|PMM2|ASGR1|TP53|ERBB2|IGFBP4|CTTNBP2NL|RAB5A|PYURF|CCNA2|R…	202	681|663|739|773|809|1435|1301|1237|1169|529|729|1353|1441|337|437|377|1195|679|1407|585|583|759|863|1445|609|711|599|1281|241|1041|1519|671|317|765|1113|685|509|1395|523|861|1349|557|641|499|821|933|273|371|957|1001|1481|1161|1339|551|1365|1083|577|715|333|403|865|741|335|1327|1023|381|979|1035|969|1279|1459|775|1387|361|723|1257|819|395|807|229|303|515|1313|299|409|1511|1473|983|323|453|873|1191…	5.18e-26		GO:0043412	2.48996e+16	0
3239	227	GO Biological Process		Positive regulation of nitrogen compound metabolic process	1.64e-23	DVL2|PPP2R5B|C12orf5|PPP1R15A|MAPK1|CSK|AGO2|RPS6KB1|VTN|NFKB1|CCND1|SKP1|PFKFB4|PPP3R1|ENO1|WDR77|EGR1|TARDBP|C3|SYMPK|PIN1|YWHAH|MYOD1|FXR2|RAF1|APOE|FUS|KRAS|CCNB1|PDGFRA|CDK4|CCT7|MDM2|DERL1|LRP6|PPP2R5A|PPP2R3C|THOC1|CDH1|PDGFRB|SNX1|FLT4|AXIN1|SRCAP|MAP2K2|MAPK3|PAX8|KDR|CTCF|CUL3|FGF2|PPP2R3A|RAB7A|EGF|SRF|HPX|IDE|ERBB3|RB1|NKD1|TP53|ERBB2|IGFBP4|CCNA2|EGFR|CCT6A|MTA2|CCT5|FLT1|WNT3A|APP|C…	202	431|663|1521|739|809|1237|1097|337|505|437|377|1195|587|585|767|1393|851|1107|1445|1497|609|831|1281|1249|241|1041|1199|317|685|509|1395|1311|523|861|1361|1349|1379|783|271|557|289|641|1383|499|821|933|1527|371|957|1481|1161|1365|633|577|1223|1493|1485|715|787|867|865|741|335|979|969|455|1459|601|1387|265|361|1261|459|503|723|1257|819|807|1403|229|675|445|347|349|1021|1075|299|1293|409|1473|983|8…	6.91e-26		GO:0051173	2.47852e+16	0
78	37	KEGG Pathways		EGFR tyrosine kinase inhibitor resistance	2.06e-23	MAPK1|RPS6KB1|RAF1|KRAS|PDGFRA|PDGFRB|MAP2K2|MAPK3|AKT3|KDR|FGF2|EGF|ERBB3|ERBB2|EGFR|BRAF|ARAF|BAX|MAP2K1|IGF1|RPS6KB2|MET|GSK3B|FGFR3|EIF4EBP1|MTOR|NRAS|SRC|AKT2|GRB2|BAD|BCL2|SHC1|HRAS|PRKCA|FGFR2|AKT1	202	809|337|241|317|509|557|821|933|273|371|1161|577|715|741|969|1257|819|1403|409|1473|619|637|1177|1323|901|593|1451|815|877|1271|1043|749|803|277|497|977|1231	6.14e-25		hsa01521	2.46861e+16	0
156	47	KEGG Pathways		Hepatitis C	2.33e-23	MAPK1|PPP2CB|NFKB1|CCND1|YWHAH|RAF1|KRAS|EIF2S1|CDK4|MAP2K2|MAPK3|AKT3|YWHAE|EGF|RB1|TP53|EGFR|BRAF|ARAF|BAX|PSME3|MAP2K1|YWHAG|CYCS|PPP2R1B|PPP2R1A|GSK3B|PPP2R2A|PPP2R2C|CTNNB1|OCLN|NRAS|YWHAB|DDX58|YWHAQ|AKT2|GRB2|PPP2R2B|BAD|YWHAZ|RELA|PPP2R2D|HRAS|PPP2CA|RXRA|AKT1|MYC	202	809|729|437|377|831|241|317|765|1395|821|933|273|1001|577|787|865|969|1257|819|1403|229|409|895|873|1495|1163|1177|879|325|989|485|1451|923|1053|833|877|1271|859|1043|1143|389|845|277|379|537|1231|391	7.64e-25		hsa05160	2463264407897398	0
8046	412	GO Biological Process		Response to stimulus	3.06e-23	DVL2|PPP2R5B|C12orf5|PPP1R15A|APOH|UNC13D|MAPK1|MICALL1|PMM1|CTSG|GZMH|GNPNAT1|MMP2|CSK|AGO2|TG|PLAT|PPP2CB|SLC5A5|PON1|FKBP14|GCK|RPS6KB1|VTN|ALDOC|NFKB1|CCND1|APOC3|FGFR1OP2|SKP1|APOB|SNX17|IGFBP2|IGFBP5|PPP3R1|ENO1|APOA1|TTR|EGR1|TARDBP|ATP7B|HIST1H4F|GOT2|C3|PIN1|STYXL1|YWHAH|MBD4|MYOD1|RAF1|APOE|GFPT2|G6PC|PPFIA1|PPP1R1B|FUS|LGALS3|KRAS|EIF2S1|MBD2|CCNB1|SORT1|PDGFRA|CDK4|PPP1R1A|MDM2|DERL1|…	202	431|663|1521|739|239|1461|809|813|1435|1301|1341|451|781|1237|1097|1417|529|729|835|841|1441|871|337|505|1291|437|377|429|1125|1195|679|573|1427|1407|585|767|583|1303|851|1107|1309|1131|737|1445|609|711|831|599|1281|241|1041|1519|475|479|751|1199|1039|317|765|1113|685|1155|509|1395|1399|523|861|425|667|1361|1259|1349|461|783|843|271|557|375|251|641|1415|1383|821|933|1527|273|793|371|1001|1481|116…	1.31e-25		GO:0050896	2451427857351842	0
3600	242	GO Biological Process		Positive regulation of macromolecule metabolic process	3.55e-23	DVL2|PPP2R5B|C12orf5|PPP1R15A|MAPK1|CSK|AGO2|GCK|RPS6KB1|VTN|NFKB1|CCND1|SKP1|APOB|PPP3R1|ENO1|WDR77|FAM98A|EGR1|TARDBP|C3|SYMPK|PIN1|YWHAH|MYOD1|FXR2|RAF1|APOE|FUS|KRAS|CCNB1|PDGFRA|CDK4|CCT7|MDM2|DERL1|LRP6|PPP2R5A|PPP2R3C|THOC1|SLC6A4|CDH1|PDGFRB|SNX1|FLT4|AXIN1|SRCAP|MAP2K2|MAPK3|PAX8|KDR|CTCF|CUL3|FGF2|PPP2R3A|RAB7A|EGF|SRF|HPX|IDE|ERBB3|RB1|NKD1|TP53|ERBB2|IGFBP4|CCNA2|EGFR|CCT6A|MTA2|CCT5|…	202	431|663|1521|739|809|1237|1097|871|337|505|437|377|1195|679|585|767|1393|759|851|1107|1445|1497|609|831|1281|1249|241|1041|1199|317|685|509|1395|1311|523|861|1361|1349|1379|783|843|271|557|289|641|1383|499|821|933|1527|371|957|1481|1161|1365|633|577|1223|1493|1485|715|787|867|865|741|335|979|969|455|1459|601|1387|265|361|1261|459|503|723|1257|819|693|807|1403|229|675|445|347|349|1021|1075|299|129…	1.55e-25		GO:0010604	2.44498e+16	0
1093	118	GO Biological Process		Positive regulation of phosphorylation	3.87e-23	DVL2|C12orf5|MAPK1|CSK|VTN|CCND1|PFKFB4|EGR1|C3|PIN1|FXR2|RAF1|APOE|KRAS|CCNB1|PDGFRA|PPP2R3C|PDGFRB|FLT4|AXIN1|MAP2K2|MAPK3|KDR|FGF2|EGF|HPX|ERBB3|TP53|ERBB2|IGFBP4|EGFR|FLT1|WNT3A|APP|FZD1|KIT|BRAF|ARAF|FGFR4|WNT1|PLK1|IGFBP6|MAP2K1|IGF1|INSR|IRS1|F2|MID1|CLU|DVL3|MET|SH2D3C|MLXIPL|F2R|STK25|CALCA|HDAC6|PLAUR|FGFR3|MAPT|PTPN11|ERBB4|CTNNB1|ANXA2|FYN|FXR1|VCP|TGFBR2|TFRC|MTOR|NENF|PFKFB2|S100A7|…	202	431|1521|809|1237|505|377|587|851|1445|609|1249|241|1041|317|685|509|1379|557|641|1383|821|933|371|1161|577|1493|715|865|741|335|969|1387|265|361|503|723|1257|819|807|675|299|1293|409|1473|983|453|579|1503|313|581|637|1247|683|1127|1523|849|493|329|1323|1297|1285|1151|989|521|1509|707|397|1487|605|593|827|1319|1233|407|945|951|815|1197|1335|247|1253|415|1211|1215|1229|283|877|1373|255|399|1043|14…	1.72e-25		GO:0042327	2441228903498109	0
2740	203	GO Biological Process		Regulation of localization	5.13e-23	CETP|APOH|UNC13D|MAPK1|NUTF2|CSK|AGO2|PON1|MEST|GCK|VTN|NFKB1|APOC3|APOB|SNX17|IGFBP5|PPP3R1|APOA1|TARDBP|C3|PIN1|YWHAH|SNX4|RAF1|APOE|PPFIA1|LGALS3|PDGFRA|CCT7|MDM2|SLC31A2|DNAJC13|COX17|PPP2R5A|IPO5|SLC6A4|CDH1|PDGFRB|SLC30A4|FLT4|MAP2K2|MAPK3|PAX8|AKT3|KDR|YWHAE|FGF2|PPP2R3A|RAB7A|EGF|SRF|ERBB3|RB1|NKD1|TP53|ERBB2|PFKL|CTTNBP2NL|RAB5A|PLA2G7|EGFR|CCT6A|MTA2|CCT5|FLT1|WNT3A|APP|RHOC|CCT8|PPARG|…	202	655|239|1461|809|629|1237|1097|841|829|871|505|437|429|679|573|1407|585|583|1107|1445|609|831|433|241|1041|479|1039|509|1311|523|1359|667|991|1349|461|843|271|557|375|641|821|933|1527|273|371|1001|1161|1365|633|577|1223|715|787|867|865|741|1095|1327|1023|1283|969|455|1459|601|1387|265|361|279|1261|459|723|1257|727|1403|445|347|303|623|1105|1021|1075|299|409|1473|983|545|453|895|301|1191|579|281|8…	2.31e-25		GO:0032879	2.42899e+16	0
1447	138	GO Biological Process		Response to endogenous stimulus	5.27e-23	MAPK1|MICALL1|MMP2|CSK|SLC5A5|GCK|RPS6KB1|NFKB1|CCND1|APOB|IGFBP2|IGFBP5|APOA1|EGR1|GOT2|YWHAH|MYOD1|G6PC|KRAS|SORT1|PDGFRA|CDK4|MDM2|KHK|LRP6|IPO5|SLC6A4|CDH1|PDGFRB|CILP|MAPK3|PAX8|FGF2|DNMT3A|SRF|IDE|RB1|SORD|TP53|ERBB2|CCNA2|EGFR|IGFBP1|APP|AKR1B1|PPARG|KIT|FGFR4|WNT1|LRP5|PRKCI|IGF1|INSR|CTNNA1|IRS1|YWHAG|CXCL8|GLB1|PPARD|MAPK7|VAMP2|PKM|TRIM25|GSK3B|HNRNPM|PAPPA|CALCA|ATP6V0A2|HFE2|FGFR3|PK…	202	809|813|781|1237|835|871|337|437|377|679|1427|1407|583|851|737|831|1281|475|317|1155|509|1395|523|425|1361|461|843|271|557|251|933|1527|1161|551|1223|1485|787|1543|865|741|979|969|1279|361|769|459|723|807|675|445|303|1473|983|545|453|895|301|1251|855|1429|501|1471|1057|1177|443|903|849|949|369|1323|1419|901|1297|1285|1151|989|985|591|521|1509|1003|747|1487|593|1061|603|699|639|237|1325|1071|719|2…	2.42e-25		GO:0009719	2427818938478745	0
198	52	GO Biological Process		Monosaccharide metabolic process	7.2e-24	PMM1|GCK|ALDOC|PFKFB4|ENO1|GOT2|G6PC|KHK|SORD|PMM2|G6PC3|PFKL|GALM|AKR1B1|HK2|HK3|LRP5|FABP5|GLB1|PPARD|ADPGK|MPI|PKM|TALDO1|ENO3|PKLR|PFKM|HKDC1|PFKFB2|TKTL1|PGM1|PFKFB1|FBP2|G6PC2|IRS2|PFKP|PGM2|AKT2|G6PD|BAD|INS|GLYCTK|TKT|IGF2|HK1|GPI|FBP1|SLC2A1|ENO2|PFKFB3|AKT1|H6PD	202	1435|871|1291|587|767|737|475|425|1543|333|1245|1095|1289|769|727|567|445|1105|1251|855|1273|771|1471|1483|1263|1419|1089|993|1319|1183|757|1335|1255|897|1411|1535|801|877|1045|1043|1457|995|1007|401|1219|1541|647|243|1109|231|1231|1331	3.36e-25		GO:0005996	2414266750356873	0
264	59	Reactome Pathways		PIP3 activates AKT signaling	7.96e-23	PPP2R5B|MAPK1|AGO2|PPP2CB|EGR1|PDGFRA|MDM2|PPP2R5A|PDGFRB|MAPK3|AKT3|STRN|FGF2|EGF|ERBB3|TP53|ERBB2|EGFR|MTA2|PPARG|KIT|FGFR4|PSME3|INSR|IRS1|RPS6KB2|PPP2R1B|SUZ12|MET|PPP2R1A|GSK3B|PPP2R5E|LCK|FGFR3|PTPN11|ERBB4|FYN|CHD4|GATAD2A|MTOR|GATAD2B|IRAK1|RBBP4|HDAC1|SRC|IRS2|RBBP7|CHD3|AKT2|GRB2|BAD|INS|FGFR1|FGFR2|PPP2R5C|PPP2R5D|PPP2CA|HDAC2|AKT1	202	663|809|1097|729|851|509|523|1349|557|933|273|793|1161|577|715|865|741|969|1459|459|723|807|229|983|453|619|1495|285|637|1163|1177|1389|915|1323|1285|1151|1509|1351|617|593|1019|945|267|651|815|1411|929|1337|877|1271|1043|1457|1123|977|799|1135|379|421|1231	1.47e-25		HSA-1257604	2409908693226233	0
3124	220	GO Biological Process		Negative regulation of metabolic process	8.22e-23	C12orf5|PPP1R15A|NUTF2|CSK|AGO2|PLAT|GCK|VTN|NFKB1|CCND1|APOC3|IGFBP5|ENO1|APOA1|EGR1|TARDBP|HIST1H4F|C3|PIN1|STYXL1|FXR2|RAF1|APOE|PPP1R1B|FUS|LGALS3|SCO1|EIF2S1|MBD2|CCNB1|PPP1R1A|MDM2|IGF2BP3|LRP6|PPP2R5A|IPO5|THOC1|CILP|RBL2|SRCAP|MAP2K2|SMG6|KDR|CTCF|YWHAE|CUL3|FGF2|DNMT3A|AMBP|VDAC1|SRF|IDE|RB1|TP53|EGFR|MTA2|APP|PPARG|FZD1|IGF2BP1|HK2|BAX|WNT1|LRP5|FABP1|H2AFZ|ABCE1|HIST1H2AA|VPS35|PLK1|LS…	202	1521|739|629|1237|1097|529|871|505|437|377|429|1407|767|583|851|1107|1131|1445|609|711|1249|241|1041|751|1199|1039|869|765|1113|685|1399|523|1101|1361|1349|461|783|251|1415|499|821|1085|371|957|1001|1481|1161|551|1083|967|1223|1485|787|865|969|1459|361|459|503|693|727|1403|675|445|631|349|1469|1103|1021|299|233|409|1473|1491|895|839|579|855|513|313|285|637|941|683|999|1531|1057|1163|1177|879|789|…	3.9e-26		GO:0009892	2408512818245995	0
11475	519	GO Biological Process		Regulation of biological process	8.63e-23	DVL2|CTTNBP2|PPP2R5B|C12orf5|PPP1R15A|CETP|APOH|UNC13D|MAPK1|PAPOLA|CTSG|GZMH|MMP2|NUTF2|CSK|AGO2|TG|PLAT|PPP2CB|PON1|FKBP14|MEST|GCK|RPS6KB1|VTN|NFKB1|CCND1|APOC3|SKP1|PFKFB4|APOB|SNX17|IGFBP2|IGFBP5|PPP3R1|ENO1|WDR77|APOA1|TTR|FAM98A|EGR1|TARDBP|HIST1H4F|C3|SYMPK|PIN1|STYXL1|YWHAH|STRIP2|MYOD1|FXR2|SNX4|RAF1|APOE|G6PC|PPFIA1|PPP1R1B|FUS|LGALS3|SCO1|CCNA1|KRAS|EIF2S1|MBD2|CCNB1|SORT1|PDGFRA|CDK4…	202	431|1137|663|1521|739|655|239|1461|809|1513|1301|1341|781|629|1237|1097|1417|529|729|841|1441|829|871|337|505|437|377|429|1195|587|679|573|1427|1407|585|767|1393|583|1303|759|851|1107|1131|1445|1497|609|711|831|481|1281|1249|433|241|1041|475|479|751|1199|1039|869|671|317|765|1113|685|1155|509|1395|1399|1311|523|1101|1359|861|425|667|991|1361|1259|1349|1379|461|783|843|271|557|375|251|289|641|1415…	4.16e-25		GO:0050789	2406398920428479	0
106	40	KEGG Pathways		HIF-1 signaling pathway	1.44e-22	MAPK1|RPS6KB1|ALDOC|NFKB1|ENO1|MAP2K2|MAPK3|AKT3|EGF|ERBB2|PFKL|EGFR|FLT1|HK2|HK3|MAP2K1|IGF1|INSR|RPS6KB2|ENO3|EIF4EBP1|PFKM|HKDC1|TFRC|MTOR|MKNK1|TEK|PFKP|AKT2|INS|BCL2|RELA|TF|HK1|PRKCA|SLC2A1|ENO2|PFKFB3|LDHA|AKT1	202	809|337|1291|437|767|821|933|273|577|741|1095|969|1387|727|567|409|1473|983|619|1263|901|1089|993|605|593|249|1215|1535|877|1457|749|389|1189|1219|497|243|1109|231|971|1231	5.14e-24		hsa04066	2384163750790475	0
1252	126	GO Biological Process		Positive regulation of protein modification process	1.67e-22	DVL2|PPP1R15A|MAPK1|CSK|VTN|CCND1|SKP1|EGR1|C3|SYMPK|PIN1|FXR2|RAF1|APOE|KRAS|CCNB1|PDGFRA|DERL1|PPP2R5A|PPP2R3C|PDGFRB|FLT4|AXIN1|MAP2K2|MAPK3|KDR|CUL3|FGF2|EGF|HPX|ERBB3|TP53|ERBB2|IGFBP4|EGFR|FLT1|WNT3A|APP|FZD1|KIT|BRAF|ARAF|FGFR4|WNT1|PLK1|IGFBP6|MAP2K1|IGF1|INSR|COMMD1|F2|MID1|CLU|DVL3|SH2D3C|F2R|STK25|CALCA|HDAC6|PLAUR|FGFR3|PTPN11|ERBB4|CTNNB1|ANXA2|FYN|FXR1|ANKLE2|WDR5|VCP|TGFBR2|TFRC|MT…	202	431|739|809|1237|505|377|1195|851|1445|1497|609|1249|241|1041|317|685|509|861|1349|1379|557|641|1383|821|933|371|1481|1161|577|1493|715|865|741|335|969|1387|265|361|503|723|1257|819|807|675|299|1293|409|1473|983|1191|579|1503|313|581|1247|1127|1523|849|493|329|1323|1285|1151|989|521|1509|707|393|275|397|1487|605|593|699|827|1369|519|1233|407|945|951|625|815|1197|1295|247|1253|415|1211|1215|1229|2…	8.18e-25		GO:0031401	2.37773e+16	0
918	106	GO Biological Process		Regulation of kinase activity	1.8e-23	DVL2|C12orf5|MAPK1|CSK|CCND1|EGR1|RAF1|APOE|PPP1R1B|CCNA1|KRAS|CCNB1|PDGFRA|CDK4|LRP6|PPP2R5A|PPP2R3C|IPO5|PDGFRB|FLT4|RBL2|AXIN1|MAP2K2|MAPK3|KDR|FGF2|EGF|ERBB3|RB1|ERBB2|CCNA2|EGFR|FLT1|WNT3A|APP|KIT|BRAF|FGFR4|LRP5|PLK1|IGFBP6|MAP2K1|IGF1|INSR|IRS1|YWHAG|F2|CLU|DVL3|MET|F2R|PPP2R1A|STK25|HGS|CALCA|FGFR3|MAPT|PTPN11|SFN|ERBB4|CCNG1|FYN|TGFBR2|MTOR|SNX6|FGFR1OP|PARK2|PFKFB2|FCGR1A|IRAK1|SRC|RBL1…	202	431|1521|809|1237|377|851|241|1041|751|671|317|685|509|1395|1361|1349|1379|461|557|641|1415|1383|821|933|371|1161|577|715|787|741|979|969|1387|265|361|723|1257|807|445|299|1293|409|1473|983|453|895|579|313|581|637|1127|1163|1523|559|849|1323|1297|1285|439|1151|569|1509|1487|593|1061|907|699|1319|407|945|815|657|1335|1411|247|1253|415|1211|1215|735|1373|255|399|1043|1449|1457|1375|1499|1189|401|11…	8.99e-25		GO:0043549	2.37447e+16	0
1275	127	GO Biological Process		Phosphorylation	2.33e-22	MAPK1|CTSG|CSK|GCK|RPS6KB1|ALDOC|NFKB1|CCND1|SKP1|PFKFB4|ENO1|LIPE|MYOD1|RAF1|KRAS|EIF2S1|CCNB1|PDGFRA|CDK4|KHK|PDGFRB|FLT4|MAP2K2|MAPK3|AKT3|KDR|YWHAE|CUL3|FGF2|EGF|ERBB3|ERBB2|PFKL|CCNA2|RASA1|EGFR|FLT1|APP|FUK|KIT|BRAF|ARAF|HK2|FGFR4|HK3|PSME3|PRKCI|PLK1|MAP2K1|BUB1|IGF1|INSR|IRS1|CYCS|RPS6KB2|MAPK7|ADPGK|MET|SH2D3C|PKM|ENO3|ULK1|GSK3B|STK25|CUL1|CALCA|LCK|FGFR3|PKLR|ERBB4|PFKM|HKDC1|FYN|IGF2R…	202	809|1301|1237|871|337|1291|437|377|1195|587|767|863|1281|241|317|765|685|509|1395|425|557|641|821|933|273|371|1001|1481|1161|577|715|741|1095|979|1035|969|1387|361|853|723|1257|819|727|807|567|229|303|299|409|1511|1473|983|453|873|619|1429|1273|637|1247|1471|1263|1433|1177|1523|925|849|915|1323|1419|1151|1089|993|1509|483|1487|593|1319|1451|945|757|249|923|815|1335|1411|1295|247|415|687|1215|1479…	1.18e-24		GO:0016310	2363264407897398	0
196	50	KEGG Pathways		Proteoglycans in cancer	2.71e-22	MAPK1|MMP2|RPS6KB1|VTN|CCND1|RAF1|KRAS|MDM2|MAP2K2|MAPK3|AKT3|KDR|FGF2|ERBB3|TP53|ERBB2|EGFR|WNT3A|FZD1|BRAF|ARAF|WNT1|MAP2K1|IGF1|RPS6KB2|MET|FZD2|PPP1CA|PLAUR|WNT8B|PTPN11|PPP1CC|ERBB4|CTNNB1|MTOR|NRAS|SRC|AKT2|GRB2|GPC3|PPP1CB|PPP1R12A|IGF2|FGFR1|RHOA|HRAS|PRKCA|WNT8A|AKT1|MYC	202	809|781|337|505|377|241|317|523|821|933|273|371|1161|715|865|741|969|265|503|1257|819|675|409|1473|619|637|817|837|329|245|1285|881|1151|989|593|1451|815|877|1271|287|1277|1055|401|1123|1157|277|497|1207|1231|391	1.05e-23		hsa05205	2.3567e+16	0
1038	113	GO Biological Process		Regulation of catabolic process	2.75e-22	C12orf5|AGO2|GCK|APOC3|PFKFB4|APOA1|TARDBP|PIN1|FXR2|APOE|FUS|SCO1|CDK4|MDM2|IGF2BP3|CDH1|SNX1|AXIN1|MAPK3|KDR|CUL3|PPP2R3A|RAB7A|EGF|VDAC1|IDE|RB1|NKD1|TP53|RAB5A|EGFR|VPS26B|APP|ARAF|IGF2BP1|HK2|BAX|PSME3|WNT1|FABP1|VPS35|PLK1|IGF1|INSR|IRS1|COMMD1|SNX32|PABPC1|CLU|MET|MLXIPL|ULK1|GSK3B|HNRNPM|PPP1CA|HGS|ATP6V0A2|HDAC6|ATG101|MAPT|ANXA2|FYN|HP|ELAVL4|FXR1|APOA4|VCP|MTOR|SNX6|PARK2|PFKFB2|APOA2|…	202	1521|1097|871|429|587|583|1107|609|1249|1041|1199|869|1395|523|1101|271|289|1383|933|371|1481|1365|633|577|967|1485|787|867|865|1023|969|1385|361|819|693|727|1403|229|675|631|1021|299|1473|983|453|1191|565|513|313|637|683|1433|1177|443|837|559|949|493|1305|1297|521|1509|875|343|707|463|397|593|1061|699|1319|639|691|951|625|1099|563|923|955|319|1335|1411|447|1211|283|877|1373|287|1013|1043|1277|91…	1.41e-24		GO:0009894	2356066730616974	0
849	101	GO Biological Process		Response to hormone	3.93e-22	MAPK1|CSK|SLC5A5|GCK|RPS6KB1|NFKB1|CCND1|APOB|IGFBP2|IGFBP5|APOA1|EGR1|GOT2|YWHAH|MYOD1|G6PC|KRAS|SORT1|CDK4|MDM2|KHK|LRP6|PDGFRB|PAX8|SRF|IDE|RB1|SORD|CCNA2|EGFR|IGFBP1|AKR1B1|PPARG|KIT|WNT1|LRP5|PRKCI|INSR|CTNNA1|IRS1|YWHAG|GLB1|PPARD|VAMP2|PKM|TRIM25|GSK3B|PAPPA|ATP6V0A2|PKLR|EIF4EBP1|PTPN11|CTNNB1|CTSB|ANXA2|FYN|NKX2-1|MAX|TGFBR2|MTOR|ACTA1|APOA2|HTR1B|IRS4|RBBP4|SRC|FABP3|AR|PFKFB1|IRS2|ANXA…	202	809|1237|835|871|337|437|377|679|1427|1407|583|851|737|831|1281|475|317|1155|1395|523|425|1361|557|1527|1223|1485|787|1543|979|969|1279|769|459|723|675|445|303|983|545|453|895|1251|855|501|1471|1057|1177|903|949|1419|901|1285|989|985|521|1509|1003|747|1487|593|603|639|1071|719|267|815|1031|1197|1335|1411|1405|415|1215|929|1479|677|877|1271|1013|1043|327|1457|1117|749|731|1455|389|305|401|1157|803…	2.08e-24		GO:0009725	2340560744962457	0
1043	113	GO Biological Process		Negative regulation of cellular protein metabolic process	3.93e-22	PPP1R15A|CSK|AGO2|PLAT|VTN|NFKB1|IGFBP5|TARDBP|C3|PIN1|STYXL1|FXR2|RAF1|APOE|PPP1R1B|LGALS3|SCO1|EIF2S1|CCNB1|PPP1R1A|MDM2|IGF2BP3|LRP6|IPO5|YWHAE|AMBP|IDE|RB1|TP53|APP|IGF2BP1|BAX|WNT1|LRP5|FABP1|VPS35|PLK1|PPP4R4|YWHAG|F2|MLXIPL|LPA|UBE2O|PPP2R1A|GSK3B|SERPINA7|HDAC6|PLAUR|PPP1R17|CAPRIN1|EIF4EBP1|MAPT|SFN|ENSA|FOXM1|CTNNB1|ANXA2|FYN|OCLN|FXR1|ITIH2|WDR5|MTOR|SNX6|FGFR1OP|PARK2|PPP1R15B|TIPRL|Y…	202	739|1237|1097|529|505|437|1407|1107|1445|609|711|1249|241|1041|751|1039|869|765|685|1399|523|1101|1361|461|1001|1083|1485|787|865|361|693|1403|675|445|631|1021|299|1491|895|579|683|999|1531|1163|1177|607|493|329|717|883|901|1297|439|355|713|989|521|1509|485|707|1139|275|593|1061|907|699|1369|811|691|951|1099|563|923|815|889|1295|539|1253|415|1211|643|1229|735|1045|287|1457|1079|1499|743|389|939|1…	2.05e-24		GO:0032269	2340560744962457	0
4333	270	GO Biological Process		Response to chemical	3.93e-22	PPP2R5B|C12orf5|MAPK1|MICALL1|PMM1|CTSG|GNPNAT1|MMP2|CSK|PPP2CB|SLC5A5|PON1|FKBP14|GCK|RPS6KB1|NFKB1|CCND1|SKP1|APOB|IGFBP2|IGFBP5|APOA1|EGR1|ATP7B|GOT2|YWHAH|MBD4|MYOD1|RAF1|APOE|GFPT2|G6PC|PPP1R1B|FUS|LGALS3|KRAS|EIF2S1|MBD2|CCNB1|SORT1|PDGFRA|CDK4|MDM2|DERL1|KHK|LRP6|LMNB1|IPO5|SLC6A4|CDH1|PDGFRB|SLC30A4|CILP|FLT4|MAPK3|PAX8|KDR|CUL3|FGF2|DNMT3A|SRF|IDE|ERP27|RB1|SORD|TP53|ERBB2|PFKL|CCNA2|EGF…	202	663|1521|809|813|1435|1301|451|781|1237|729|835|841|1441|871|337|437|377|1195|679|1427|1407|583|851|1309|737|831|599|1281|241|1041|1519|475|751|1199|1039|317|765|1113|685|1155|509|1395|523|861|425|1361|1259|461|843|271|557|375|251|641|933|1527|371|1481|1161|551|1223|1485|627|787|1543|865|741|1095|979|969|1279|1385|1387|265|361|769|459|503|853|723|1257|727|807|1403|229|675|445|303|631|515|349|973|…	2.06e-24		GO:0042221	2340560744962457	0
1096	116	GO Biological Process		Negative regulation of protein metabolic process	4.56e-22	PPP1R15A|CSK|AGO2|PLAT|VTN|NFKB1|IGFBP5|TARDBP|C3|PIN1|STYXL1|FXR2|RAF1|APOE|PPP1R1B|LGALS3|SCO1|EIF2S1|CCNB1|PPP1R1A|MDM2|IGF2BP3|LRP6|IPO5|YWHAE|AMBP|IDE|RB1|TP53|EGFR|APP|IGF2BP1|BAX|WNT1|LRP5|FABP1|VPS35|PLK1|IGF1|PPP4R4|YWHAG|F2|CLU|MLXIPL|LPA|UBE2O|PPP2R1A|GSK3B|SERPINA7|HDAC6|PLAUR|PPP1R17|CAPRIN1|EIF4EBP1|MAPT|SFN|ENSA|FOXM1|CTNNB1|ANXA2|FYN|OCLN|FXR1|ITIH2|WDR5|MTOR|SNX6|FGFR1OP|PARK2|PP…	202	739|1237|1097|529|505|437|1407|1107|1445|609|711|1249|241|1041|751|1039|869|765|685|1399|523|1101|1361|461|1001|1083|1485|787|865|969|361|693|1403|675|445|631|1021|299|1473|1491|895|579|313|683|999|1531|1163|1177|607|493|329|717|883|901|1297|439|355|713|989|521|1509|485|707|1139|275|593|1061|907|699|1369|811|691|951|1099|563|923|815|889|1295|539|1253|415|1211|643|1229|735|1045|287|1457|1079|1499|…	2.49e-24		GO:0051248	2.3341e+16	0
2919	208	GO Biological Process		Cellular response to chemical stimulus	9e-23	PPP2R5B|C12orf5|MAPK1|MICALL1|PMM1|CTSG|GNPNAT1|MMP2|CSK|SLC5A5|FKBP14|GCK|RPS6KB1|NFKB1|CCND1|SKP1|APOB|IGFBP2|IGFBP5|EGR1|YWHAH|MYOD1|RAF1|APOE|GFPT2|G6PC|FUS|LGALS3|KRAS|EIF2S1|MBD2|CCNB1|SORT1|PDGFRA|CDK4|MDM2|DERL1|LRP6|LMNB1|IPO5|SLC6A4|CDH1|PDGFRB|CILP|FLT4|MAPK3|PAX8|KDR|CUL3|FGF2|DNMT3A|SRF|IDE|RB1|TP53|ERBB2|CCNA2|EGFR|IGFBP1|VPS26B|FLT1|WNT3A|APP|AKR1B1|PPARG|KIT|BRAF|HK2|FGFR4|BAX|PSM…	202	663|1521|809|813|1435|1301|451|781|1237|835|1441|871|337|437|377|1195|679|1427|1407|851|831|1281|241|1041|1519|475|1199|1039|317|765|1113|685|1155|509|1395|523|861|1361|1259|461|843|271|557|251|641|933|1527|371|1481|1161|551|1223|1485|787|865|741|979|969|1279|1385|1387|265|361|769|459|723|1257|727|807|1403|229|675|303|631|515|349|973|1473|983|545|453|1115|895|301|873|855|1429|1503|501|911|555|909…	4.97e-24		GO:0070887	2.30458e+16	0
502	77	Reactome Pathways		Signaling by Receptor Tyrosine Kinases	1.21e-21	MAPK1|CSK|PLAT|PPP2CB|EGR1|APOE|KRAS|PDGFRA|PDGFRB|CILP|FLT4|MAP2K2|MAPK3|AKT3|KDR|FGF2|EGF|SRF|ERBB3|ERBB2|RASA1|EGFR|FLT1|KIT|BRAF|FGFR4|BAX|MAP2K1|IGF1|INSR|CTNNA1|IRS1|PLG|MAPK7|PPP2R1B|MET|PPP2R1A|HNRNPM|HGS|ATP6V0A2|LCK|FGFR3|PTPN11|ERBB4|CTNNB1|FYN|CHD4|MTOR|TIAL1|NRAS|MKNK1|IRS4|YWHAB|SRC|IRS2|SPRY2|PRKCZ|AKT2|GRB2|INS|CTNND1|CHEK1|IGF2|FGFR1|RHOA|SHC1|TIA1|HRAS|PRKCA|FGFR2|NCK1|PPP2R5D|P…	202	809|1237|529|729|851|1041|317|509|557|251|641|821|933|273|371|1161|577|1223|715|741|1035|969|1387|723|1257|807|1403|409|1473|983|545|453|281|1429|1495|637|1163|443|559|949|915|1323|1285|1151|989|1509|1351|593|237|1451|249|719|923|815|1411|1253|415|877|1271|1457|709|457|401|1123|1157|803|1235|277|497|977|517|1135|379|1111|467|1231|1269	2.78e-24		HSA-9006934	2291721462968355	0
93	37	KEGG Pathways		mRNA surveillance pathway	2.02e-21	PPP2R5B|PAPOLA|PPP2CB|CPSF3|PAPOLG|TARDBP|SYMPK|FUS|PPP2R5A|PPP2R3C|SMG6|PPP2R3A|SSU72|WDR82|CPSF2|PPP2R1B|PABPC1|PPP2R1A|PPP2R2A|PPP1CA|PPP2R2C|FIP1L1|PPP2R5E|PPP1CC|SMG5|PABPC4|CSTF2|PPP2R3B|PPP2R2B|PPP1CB|PAPOLB|PPP2R2D|PPP2R5C|PPP2R5D|PPP2CA|UPF1|CPSF1	202	663|1513|729|1265|891|1107|1497|1199|1349|1379|1085|1365|395|1313|1467|1495|513|1163|879|837|325|1545|1389|881|1505|955|549|1475|859|1277|1049|845|799|1135|379|959|965	8.41e-23		hsa03015	2.26946e+16	0
2875	205	GO Biological Process		Negative regulation of macromolecule metabolic process	2.24e-21	PPP1R15A|NUTF2|CSK|AGO2|PLAT|VTN|NFKB1|CCND1|IGFBP5|ENO1|APOA1|EGR1|TARDBP|HIST1H4F|C3|PIN1|STYXL1|FXR2|RAF1|APOE|PPP1R1B|FUS|LGALS3|SCO1|EIF2S1|MBD2|CCNB1|PPP1R1A|MDM2|IGF2BP3|LRP6|IPO5|THOC1|CILP|RBL2|SRCAP|MAP2K2|SMG6|KDR|CTCF|YWHAE|CUL3|FGF2|DNMT3A|AMBP|SRF|IDE|RB1|TP53|EGFR|MTA2|APP|PPARG|FZD1|IGF2BP1|BAX|WNT1|LRP5|FABP1|H2AFZ|ABCE1|HIST1H2AA|VPS35|PLK1|LSM3|MAP2K1|IGF1|PPP4R4|YWHAG|H2AFV|F2…	202	739|629|1237|1097|529|505|437|377|1407|767|583|851|1107|1131|1445|609|711|1249|241|1041|751|1199|1039|869|765|1113|685|1399|523|1101|1361|461|783|251|1415|499|821|1085|371|957|1001|1481|1161|551|1083|1223|1485|787|865|969|1459|361|459|503|693|1403|675|445|631|349|1469|1103|1021|299|233|409|1473|1491|895|839|579|855|513|313|285|941|683|999|1531|1057|1163|1177|879|789|607|849|1391|493|369|329|717|8…	1.25e-23		GO:0010605	2.26498e+16	0
2967	209	GO Biological Process		Cellular localization	2.6e-22	M6PR|DVL2|PPP1R15A|APOH|UNC13D|SNRPD3|MAPK1|MICALL1|PMM1|CTSG|NUTF2|SCG3|SNX8|ALDOC|NFKB1|SKP1|SNX17|APOA1|TTR|CPSF3|FAM98A|ATP7B|C3|SYMPK|YWHAH|SNX4|RAF1|APOE|PPFIA1|LGALS3|CCNB1|SORT1|MDM2|DERL1|DNAJC13|LRP6|IPO5|THOC1|SLC6A4|CDH1|SNX1|SMG6|CTCF|YWHAE|CUL3|FGF2|RAB7A|EGF|TRPV5|IDE|SNRPF|RB1|PMM2|TP53|PFKL|GEMIN7|SNRPG|RAB5A|FTH1|EGFR|VPS26B|GEMIN6|WNT3A|APP|GEMIN5|WHAMM|CCT8|KIT|BRAF|HK2|HK3|BA…	202	1343|431|739|239|1461|773|809|813|1435|1301|629|1169|1025|1291|437|1195|573|583|1303|1265|759|1309|1445|1497|831|433|241|1041|479|1039|685|1155|523|861|667|1361|461|783|843|271|289|1085|957|1001|1481|1161|633|577|1059|1485|1421|787|333|865|1095|527|417|1023|405|969|1385|1173|265|361|495|1347|1261|723|1257|727|567|1403|303|515|623|1367|1469|973|1105|1287|1467|1021|1075|299|935|1473|1051|545|895|12…	1.48e-23		GO:0051641	2258502665202918	0
3514	233	GO Biological Process		Regulation of cell communication	3.05e-21	DVL2|PPP2R5B|PPP1R15A|MAPK1|CSK|PLAT|PPP2CB|GCK|RPS6KB1|VTN|NFKB1|APOC3|IGFBP2|IGFBP5|PPP3R1|ENO1|APOA1|EGR1|TARDBP|C3|PIN1|STYXL1|YWHAH|SNX4|RAF1|APOE|LGALS3|KRAS|MBD2|PDGFRA|CDK4|MDM2|LRP6|SLC6A4|CDH1|PDGFRB|CILP|FLT4|AXIN1|MAP2K2|MAPK3|PAX8|KDR|YWHAE|CUL3|FGF2|PPP2R3A|RAB7A|AMBP|EGF|SRF|HPX|ERBB3|RB1|NKD1|TP53|ERBB2|IGFBP4|PFKL|RAB5A|RASA1|EGFR|IGFBP1|MTA2|FLT1|WNT3A|APP|RHOC|AKR1B1|PPARG|FZD1…	202	431|663|739|809|1237|529|729|871|337|505|437|429|1427|1407|585|767|583|851|1107|1445|609|711|831|433|241|1041|1039|317|1113|509|1395|523|1361|843|271|557|251|641|1383|821|933|1527|371|1001|1481|1161|1365|633|1083|577|1223|1493|715|787|867|865|741|335|1095|1023|1035|969|1279|1459|1387|265|361|279|769|459|503|723|1257|819|807|1403|229|675|445|303|1367|1469|1105|1021|1293|409|1473|983|387|545|453|89…	1.75e-23		GO:0010646	2.25157e+16	0
1284	125	GO Biological Process		Regulation of hydrolase activity	3.7e-22	DVL2|PPP2R5B|PPP1R15A|APOH|VTN|APOC3|APOA1|C3|PIN1|STYXL1|RAF1|PPP1R1B|LGALS3|SORT1|PDGFRA|PPP1R1A|MDM2|PPP2R5A|IPO5|PDGFRB|MAPK3|YWHAE|FGF2|PPP2R3A|AMBP|TP53|ERBB2|RASA1|EGFR|FLT1|WNT3A|APP|RHOC|PPARG|KIT|BAX|PSME3|FABP1|ABCE1|PPP4R4|CYCS|MAPK7|PPP2R1B|DVL3|F2R|LPA|UBE2O|PPP2R1A|GSK3B|PPP2R2A|SERPINA7|ATP4B|PPP2R2C|PPP2R5E|LCK|PLAUR|FGFR3|PPP1R17|MAPT|SFN|ENSA|ANXA2|FYN|PPP4R2|APOA4|ANKLE2|ITIH2…	202	431|663|739|239|505|429|583|1445|609|711|241|751|1039|1155|509|1399|523|1349|461|557|933|1001|1161|1365|1083|865|741|1035|969|1387|265|361|279|459|723|1403|229|631|1469|1491|873|1429|1495|581|1127|999|1531|1163|1177|879|607|1463|325|1389|915|329|1323|717|1297|439|355|521|1509|307|463|393|1139|397|593|1369|811|639|697|1325|563|651|815|889|1295|539|1405|1253|1345|415|643|1229|1475|877|1373|1515|287…	2.16e-23		GO:0051336	2.24318e+16	0
96	37	KEGG Pathways		Prostate cancer	4.61e-21	MAPK1|PLAT|NFKB1|CCND1|RAF1|KRAS|PDGFRA|MDM2|PDGFRB|MAP2K2|MAPK3|AKT3|EGF|RB1|TP53|ERBB2|EGFR|BRAF|ARAF|MAP2K1|IGF1|KLK3|GSK3B|CTNNB1|MTOR|NRAS|AR|AKT2|GRB2|BAD|INS|BCL2|RELA|FGFR1|HRAS|FGFR2|AKT1	202	809|529|437|377|241|317|509|523|557|821|933|273|577|787|865|741|969|1257|819|409|1473|257|1177|989|593|1451|1197|877|1271|1043|1457|749|389|1123|277|977|1231	2.06e-22		hsa05215	2.23363e+16	0
288	57	KEGG Pathways		MAPK signaling pathway	4.88e-21	MAPK1|NFKB1|PPP3R1|RAF1|KRAS|PDGFRA|PDGFRB|FLT4|MAP2K2|MAPK3|AKT3|KDR|FGF2|EGF|SRF|ERBB3|TP53|ERBB2|RASA1|EGFR|FLT1|KIT|BRAF|ARAF|FGFR4|MAP2K1|IGF1|INSR|MAPK7|MET|FGFR3|MAPT|ERBB4|MAX|TGFBR2|PLA2G4A|NRAS|IRAK1|MKNK1|TEK|AKT2|GRB2|PPP3CB|PPP3CA|INS|RELA|IGF2|FGFR1|ARRB2|HRAS|PRKCA|ARRB1|FGFR2|STK3|NTRK1|AKT1|MYC	202	809|437|585|241|317|509|557|641|821|933|273|371|1161|577|1223|715|865|741|1035|969|1387|723|1257|819|807|409|1473|983|1429|637|1323|1297|1151|747|1487|1017|1451|945|249|1215|877|1271|1363|1371|1457|389|401|1123|887|277|497|701|977|1439|467|1231|391	2.32e-22		hsa04010	2231158017799729	0
3553	234	GO Biological Process		Regulation of signaling	5.42e-21	DVL2|PPP2R5B|PPP1R15A|MAPK1|CSK|PLAT|PPP2CB|GCK|RPS6KB1|VTN|NFKB1|APOC3|IGFBP2|IGFBP5|PPP3R1|ENO1|APOA1|EGR1|TARDBP|C3|PIN1|STYXL1|YWHAH|SNX4|RAF1|APOE|LGALS3|KRAS|MBD2|PDGFRA|CDK4|MDM2|LRP6|SLC6A4|CDH1|PDGFRB|CILP|FLT4|AXIN1|MAP2K2|MAPK3|PAX8|KDR|YWHAE|CUL3|FGF2|PPP2R3A|RAB7A|AMBP|EGF|SRF|HPX|ERBB3|RB1|NKD1|TP53|ERBB2|IGFBP4|PFKL|RAB5A|RASA1|EGFR|IGFBP1|MTA2|FLT1|WNT3A|APP|RHOC|AKR1B1|PPARG|FZD1…	202	431|663|739|809|1237|529|729|871|337|505|437|429|1427|1407|585|767|583|851|1107|1445|609|711|831|433|241|1041|1039|317|1113|509|1395|523|1361|843|271|557|251|641|1383|821|933|1527|371|1001|1481|1161|1365|633|1083|577|1223|1493|715|787|867|865|741|335|1095|1023|1035|969|1279|1459|1387|265|361|279|769|459|503|723|1257|819|807|1403|229|675|445|303|1367|1469|1105|1021|1293|409|1473|983|387|545|453|89…	3.21e-23		GO:0023051	2.2266e+16	0
5447	311	GO Biological Process		Cellular component organization	5.47e-21	M6PR|DVL2|PPP1R15A|CETP|SF3A1|SNRPD3|MAPK1|MICALL1|CTSG|MMP2|CSK|AGO2|PPP2CB|FBL|VTN|APOC3|SKP1|APOB|PPP3R1|WDR77|APOA1|TTR|TARDBP|HIST1H4F|PIN1|YWHAH|STRIP2|MYOD1|RAF1|APOE|PPFIA1|FUS|SCO1|CCNA1|KRAS|EIF2S1|MBD2|CCNB1|SORT1|PDGFRA|CDK4|MDM2|DNAJC13|COX17|LRP6|PPP2R3C|CDH1|PDGFRB|SNX1|RBL2|AXIN1|SRCAP|MAPK3|SMG6|SGOL1|AKT3|STRN|KDR|LCAT|CTCF|YWHAE|CUL3|FGF2|DNMT3A|RAB7A|EGF|TRPV5|SRF|IDE|SNRPF|RB…	202	1343|431|739|655|411|773|809|813|1301|781|1237|1097|729|1353|505|429|1195|679|585|1393|583|1303|1107|1131|609|831|481|1281|241|1041|479|1199|869|671|317|765|1113|685|1155|509|1395|523|667|991|1361|1379|271|557|289|1415|1383|499|933|1085|465|273|793|371|963|957|1001|1481|1161|551|633|577|1059|1223|1485|1421|787|865|741|1095|527|417|1023|979|1035|1283|969|1459|1173|265|361|279|495|1347|1261|503|723…	3.28e-23		GO:0016043	2226201267366657	0
304	60	Reactome Pathways		Intracellular signaling by second messengers	5.53e-21	PPP2R5B|MAPK1|AGO2|PPP2CB|EGR1|PDGFRA|MDM2|PPP2R5A|PDGFRB|MAPK3|AKT3|STRN|FGF2|EGF|ERBB3|TP53|ERBB2|EGFR|MTA2|PPARG|KIT|FGFR4|PSME3|INSR|IRS1|RPS6KB2|PPP2R1B|SUZ12|MET|PPP2R1A|GSK3B|PPP2R5E|LCK|FGFR3|PTPN11|ERBB4|FYN|CHD4|GATAD2A|MTOR|GATAD2B|IRAK1|RBBP4|HDAC1|SRC|IRS2|RBBP7|CHD3|AKT2|GRB2|BAD|INS|FGFR1|PRKCA|FGFR2|PPP2R5C|PPP2R5D|PPP2CA|HDAC2|AKT1	202	663|809|1097|729|851|509|523|1349|557|933|273|793|1161|577|715|865|741|969|1459|459|723|807|229|983|453|619|1495|285|637|1163|1177|1389|915|1323|1285|1151|1509|1351|617|593|1019|945|267|651|815|1411|929|1337|877|1271|1043|1457|1123|497|977|799|1135|379|421|1231	1.53e-23		HSA-9006925	222572748686953	0
4913	290	GO Biological Process		Regulation of molecular function	5.99e-21	DVL2|PPP2R5B|C12orf5|PPP1R15A|APOH|MAPK1|CSK|TG|PPP2CB|PON1|VTN|NFKB1|CCND1|APOC3|SKP1|ENO1|WDR77|APOA1|TTR|EGR1|TARDBP|C3|SYMPK|PIN1|STYXL1|YWHAH|MYOD1|RAF1|APOE|PPP1R1B|FUS|LGALS3|CCNA1|KRAS|EIF2S1|MBD2|CCNB1|SORT1|PDGFRA|CDK4|PPP1R1A|MDM2|DERL1|COX17|LRP6|PPP2R5A|PPP2R3C|IPO5|PDGFRB|FLT4|RBL2|AXIN1|SRCAP|MAP2K2|MAPK3|SMG6|PAX8|KDR|CTCF|YWHAE|FGF2|DNMT3A|PPP2R3A|AMBP|EGF|SRF|IDE|ERBB3|RB1|TP53|…	202	431|663|1521|739|239|809|1237|1417|729|841|505|437|377|429|1195|767|1393|583|1303|851|1107|1445|1497|609|711|831|1281|241|1041|751|1199|1039|671|317|765|1113|685|1155|509|1395|1399|523|861|991|1361|1349|1379|461|557|641|1415|1383|499|821|933|1085|1527|371|957|1001|1161|551|1365|1083|577|1223|1485|715|787|865|741|1327|979|1035|969|1459|775|1387|265|361|279|459|503|723|1257|807|1403|229|675|445|303…	3.64e-23		GO:0065009	2222257317761069	0
705	89	GO Biological Process		Positive regulation of transferase activity	1.13e-20	DVL2|C12orf5|MAPK1|CSK|CCND1|SKP1|EGR1|PIN1|RAF1|KRAS|CCNB1|PDGFRA|PPP2R3C|PDGFRB|FLT4|AXIN1|MAP2K2|MAPK3|KDR|FGF2|EGF|ERBB3|ERBB2|EGFR|FLT1|WNT3A|APP|KIT|BRAF|FGFR4|CCT2|PLK1|IGFBP6|MAP2K1|IGF1|INSR|IRS1|F2|CLU|DVL3|MET|TCP1|F2R|STK25|CALCA|FGFR3|MAPT|PTPN11|ERBB4|CTNNB1|FYN|TGFBR2|MTOR|PFKFB2|FCGR1A|IRAK1|CDC20|SRC|PFKFB1|MASTL|STK24|SPRY2|PRKCZ|TEK|SNX9|PDCD10|MST4|CCT4|BAD|CDK1|INS|KSR1|DDX3X…	202	431|1521|809|1237|377|1195|851|609|241|317|685|509|1379|557|641|1383|821|933|371|1161|577|715|741|969|1387|265|361|723|1257|807|1075|299|1293|409|1473|983|453|579|313|581|637|911|1127|1523|849|1323|1297|1285|1151|989|1509|1487|593|1319|407|945|625|815|1335|1295|247|1253|415|1215|1373|255|399|259|1043|1449|1457|1375|1499|1189|401|1123|1157|803|277|701|977|379|1111|1439|467|419|1231|391|1175	6.94e-23		GO:0051347	2194692155651658	0
467	72	GO Biological Process		Carbohydrate metabolic process	1.61e-20	ST6GALNAC1|PMM1|GCK|ALDOC|PFKFB4|ENO1|GOT2|G6PC|PPP1R1A|KHK|TREH|LCT|SI|SORD|PMM2|G6PC3|PFKL|GALM|PPP1R3A|AKR1B1|FUK|BRAF|HK2|HK3|LRP5|GNPDA2|FABP5|GUSB|INSR|GLB1|PPARD|ADPGK|MPI|PKM|TALDO1|ENO3|GSK3B|PPP1CA|PKLR|PPP1CC|PFKM|HKDC1|PFKFB2|PLA2G4A|TKTL1|PGM1|PFKFB1|FBP2|G6PC2|IRS2|PFKP|PGM2|AKT2|G6PD|BAD|PPP1CB|INS|GLYCTK|TKT|IGF2|HK1|GPI|FBP1|SYNJ1|SLC2A1|DERA|GNPDA1|ENO2|PFKFB3|LDHA|AKT1|H6PD	202	681|1435|871|1291|587|767|737|475|1399|425|1203|1087|1149|1543|333|1245|1095|1289|777|769|853|1257|727|567|445|353|1105|1051|983|1251|855|1273|771|1471|1483|1263|1177|837|1419|881|1089|993|1319|1017|1183|757|1335|1255|897|1411|1535|801|877|1045|1043|1277|1457|995|1007|401|1219|1541|647|491|243|1517|595|1109|231|971|1231|1331	1e-23		GO:0005975	2179317412396815	0
2630	191	GO Biological Process		Negative regulation of cellular metabolic process	2.51e-20	C12orf5|PPP1R15A|CSK|AGO2|PLAT|GCK|VTN|NFKB1|CCND1|APOC3|IGFBP5|ENO1|EGR1|TARDBP|HIST1H4F|C3|PIN1|STYXL1|FXR2|RAF1|APOE|PPP1R1B|FUS|LGALS3|SCO1|EIF2S1|MBD2|CCNB1|PPP1R1A|MDM2|IGF2BP3|LRP6|PPP2R5A|IPO5|THOC1|SMG6|CTCF|YWHAE|CUL3|DNMT3A|AMBP|VDAC1|SRF|IDE|RB1|TP53|MTA2|APP|PPARG|FZD1|IGF2BP1|HK2|BAX|WNT1|LRP5|FABP1|H2AFZ|ABCE1|HIST1H2AA|VPS35|PLK1|IGF1|PPP4R4|YWHAG|H2AFV|F2|PPARD|PABPC1|CLU|SUZ12|M…	202	1521|739|1237|1097|529|871|505|437|377|429|1407|767|851|1107|1131|1445|609|711|1249|241|1041|751|1199|1039|869|765|1113|685|1399|523|1101|1361|1349|461|783|1085|957|1001|1481|551|1083|967|1223|1485|787|865|1459|361|459|503|693|727|1403|675|445|631|349|1469|1103|1021|299|1473|1491|895|839|579|855|513|313|285|637|941|683|999|1531|1163|1177|789|607|849|1391|493|369|329|717|883|901|1297|439|931|355|7…	1.58e-22		GO:0031324	2.16003e+16	0
1209	119	GO Biological Process		Positive regulation of cellular component organization	2.57e-20	DVL2|PPP2R5B|PPP1R15A|MAPK1|VTN|PPP3R1|APOA1|FAM98A|C3|STYXL1|YWHAH|MYOD1|APOE|LGALS3|CCNB1|CCT7|PDGFRB|MAPK3|KDR|YWHAE|CUL3|EGF|SRF|RB1|TP53|CCT6A|CCT5|WNT3A|APP|RHOC|WHAMM|CCT8|PPARG|FZD1|KIT|HK2|BAX|WNT1|LRP5|CCT3|PRKCI|RAD21|VPS35|CCT2|MAP2K1|IGF1|INSR|YWHAG|CLU|DVL3|MET|TCP1|KIAA0196|MMP1|ULK1|GSK3B|STK25|HDAC6|PLAUR|CAPRIN1|MAPT|SFN|CTNNB1|ATP7A|ANXA2|FYN|OCLN|WDR5|VCP|G3BP2|TFRC|MTOR|DCTN1…	202	431|663|739|809|505|585|583|759|1445|711|831|1281|1041|1039|685|1311|557|933|371|1001|1481|577|1223|787|865|455|601|265|361|279|1347|1261|459|503|723|727|1403|675|445|347|303|1287|1021|1075|409|1473|983|895|313|581|637|911|1181|997|1433|1177|1523|493|329|883|1297|439|989|591|521|1509|485|275|397|423|605|593|615|699|519|697|951|625|923|815|1197|539|1405|1211|1215|643|833|877|1373|1271|1241|287|259…	1.64e-22		GO:0051130	2.15901e+16	0
2375	178	GO Biological Process		Establishment of localization in cell	6.48e-20	M6PR|APOH|UNC13D|SNRPD3|MAPK1|MICALL1|PMM1|CTSG|NUTF2|SCG3|SNX8|ALDOC|NFKB1|SNX17|APOA1|TTR|CPSF3|C3|SYMPK|YWHAH|SNX4|RAF1|APOE|PPFIA1|LGALS3|CCNB1|SORT1|DERL1|DNAJC13|LRP6|IPO5|THOC1|SLC6A4|SNX1|SMG6|YWHAE|CUL3|FGF2|RAB7A|EGF|TRPV5|IDE|SNRPF|PMM2|TP53|PFKL|GEMIN7|SNRPG|RAB5A|FTH1|VPS26B|GEMIN6|WNT3A|APP|GEMIN5|WHAMM|CCT8|KIT|HK3|BAX|PRKCI|ALB|IFT122|ABCE1|HSPA9|FABP5|CPSF2|VPS35|CCT2|PLK1|SNRPD1…	202	1343|239|1461|773|809|813|1435|1301|629|1169|1025|1291|437|573|583|1303|1265|1445|1497|831|433|241|1041|479|1039|685|1155|861|667|1361|461|783|843|289|1085|1001|1481|1161|633|577|1059|1485|1421|333|865|1095|527|417|1023|405|1385|1173|265|361|495|1347|1261|723|567|1403|303|515|1367|1469|973|1105|1467|1021|1075|299|935|1473|1051|895|1251|611|579|281|1423|565|501|313|1315|1181|909|1471|263|1127|905|…	4.19e-22		GO:0051649	2.11884e+16	0
10932	495	GO Biological Process		Regulation of cellular process	7.21e-20	DVL2|CTTNBP2|PPP2R5B|C12orf5|PPP1R15A|CETP|APOH|UNC13D|MAPK1|PAPOLA|GZMH|MMP2|NUTF2|CSK|AGO2|TG|PLAT|PPP2CB|FKBP14|GCK|RPS6KB1|VTN|NFKB1|CCND1|APOC3|SKP1|PFKFB4|APOB|SNX17|IGFBP2|IGFBP5|PPP3R1|ENO1|WDR77|APOA1|TTR|FAM98A|EGR1|TARDBP|HIST1H4F|C3|SYMPK|PIN1|STYXL1|YWHAH|MYOD1|FXR2|SNX4|RAF1|APOE|PPFIA1|PPP1R1B|FUS|LGALS3|SCO1|CCNA1|KRAS|EIF2S1|MBD2|CCNB1|SORT1|PDGFRA|CDK4|PPP1R1A|CCT7|MDM2|IGF2BP3|…	202	431|1137|663|1521|739|655|239|1461|809|1513|1341|781|629|1237|1097|1417|529|729|1441|871|337|505|437|377|429|1195|587|679|573|1427|1407|585|767|1393|583|1303|759|851|1107|1131|1445|1497|609|711|831|1281|1249|433|241|1041|479|751|1199|1039|869|671|317|765|1113|685|1155|509|1395|1399|1311|523|1101|1359|861|425|667|991|1361|1259|1349|1379|461|783|843|271|557|375|251|641|1415|1383|499|821|933|1085|15…	4.71e-22		GO:0050794	2114206473528057	0
112	39	Reactome Pathways		Negative regulation of the PI3K/AKT network	7.35e-20	PPP2R5B|MAPK1|PPP2CB|PDGFRA|PPP2R5A|PDGFRB|MAPK3|AKT3|STRN|FGF2|EGF|ERBB3|ERBB2|EGFR|KIT|FGFR4|INSR|IRS1|PPP2R1B|MET|PPP2R1A|PPP2R5E|LCK|FGFR3|PTPN11|ERBB4|FYN|IRAK1|SRC|IRS2|AKT2|GRB2|INS|FGFR1|FGFR2|PPP2R5C|PPP2R5D|PPP2CA|AKT1	202	663|809|729|509|1349|557|933|273|793|1161|577|715|741|969|723|807|983|453|1495|637|1163|1389|915|1323|1285|1151|1509|945|815|1411|877|1271|1457|1123|977|799|1135|379|1231	2.37e-22		HSA-199418	2.11337e+16	0
1019	107	GO Biological Process		Positive regulation of protein phosphorylation	8.03e-20	DVL2|MAPK1|CSK|VTN|CCND1|EGR1|C3|PIN1|FXR2|RAF1|APOE|KRAS|CCNB1|PDGFRA|PPP2R3C|PDGFRB|FLT4|AXIN1|MAP2K2|MAPK3|KDR|FGF2|EGF|HPX|ERBB3|TP53|ERBB2|IGFBP4|EGFR|FLT1|WNT3A|APP|FZD1|KIT|BRAF|ARAF|FGFR4|WNT1|PLK1|IGFBP6|MAP2K1|IGF1|INSR|F2|MID1|CLU|DVL3|SH2D3C|F2R|STK25|CALCA|HDAC6|PLAUR|FGFR3|PTPN11|ERBB4|CTNNB1|ANXA2|FYN|FXR1|TGFBR2|TFRC|MTOR|NENF|S100A7|FCGR1A|IRAK1|FMR1|SRC|AR|STK24|SPRY2|PRKCZ|DVL1…	202	431|809|1237|505|377|851|1445|609|1249|241|1041|317|685|509|1379|557|641|1383|821|933|371|1161|577|1493|715|865|741|335|969|1387|265|361|503|723|1257|819|807|675|299|1293|409|1473|983|579|1503|313|581|1247|1127|1523|849|493|329|1323|1285|1151|989|521|1509|707|1487|605|593|827|1233|407|945|951|815|1197|247|1253|415|1211|1215|1229|283|877|1373|255|399|1449|1457|749|1375|1499|1189|401|1123|1157|803|…	5.31e-22		GO:0001934	2109528445472132	0
647	84	Reactome Pathways		Cell Cycle	8.57e-20	PPP2R5B|MAPK1|PPP2CB|CCND1|SKP1|YWHAH|CCNA1|CCNB1|CDK4|MDM2|LMNB1|PPP2R5A|RBL2|MAPK3|SGOL1|AKT3|YWHAE|RB1|TP53|CCNA2|PSME3|H2AFZ|RAD21|PLK1|BUB1|YWHAG|H2AFV|BANF1|PPP2R1B|PPP2R1A|GSK3B|PPP2R2A|CUL1|HIST1H2AJ|HIST2H2AC|PPP2R5E|SFN|HIST1H2AD|PPP1CC|FOXM1|ANKLE2|MAX|DCTN1|FGFR1OP|LMNA|CDC20|SET|YWHAB|RBBP4|HDAC1|SRC|RBL1|MASTL|HIST1H2AC|RBBP7|YWHAQ|CHEK2|PPP2R3B|AKT2|PPP6R3|CDK1|PPP1CB|YWHAZ|PPME1|L…	202	663|809|729|377|1195|831|671|685|1395|523|1259|1349|1415|933|465|273|1001|787|865|979|229|349|1287|299|1511|895|839|1423|1495|1163|1177|879|925|789|1391|1389|439|931|881|713|393|747|615|907|519|625|563|923|267|651|815|657|1295|1009|929|833|283|1475|877|1515|1449|1277|1143|1079|797|457|1055|845|497|799|665|1135|379|1111|1145|367|1027|1231|547|1209|391|1213|1243|943	3.16e-22		HSA-1640170	2.1067e+16	0
116	39	GO Biological Process		Glucose metabolic process	1.01e-19	GCK|ALDOC|ENO1|GOT2|G6PC|SORD|G6PC3|PFKL|GALM|HK2|HK3|LRP5|FABP5|PPARD|ADPGK|PKM|ENO3|PKLR|PFKM|PFKFB2|TKTL1|PGM1|PFKFB1|FBP2|G6PC2|IRS2|PFKP|PGM2|AKT2|G6PD|BAD|INS|IGF2|HK1|GPI|FBP1|ENO2|AKT1|H6PD	202	871|1291|767|737|475|1543|1245|1095|1289|727|567|445|1105|855|1273|1471|1263|1419|1089|1319|1183|757|1335|1255|897|1411|1535|801|877|1045|1043|1457|401|1219|1541|647|1109|1231|1331	6.77e-22		GO:0006006	2099567862621736	0
2369	177	GO Biological Process		Cellular response to organic substance	1.22e-19	PPP2R5B|MAPK1|MICALL1|PMM1|CTSG|GNPNAT1|MMP2|CSK|SLC5A5|FKBP14|GCK|RPS6KB1|NFKB1|CCND1|SKP1|APOB|IGFBP2|IGFBP5|EGR1|YWHAH|MYOD1|RAF1|GFPT2|G6PC|KRAS|EIF2S1|MBD2|CCNB1|SORT1|PDGFRA|CDK4|MDM2|DERL1|LRP6|LMNB1|IPO5|SLC6A4|CDH1|PDGFRB|CILP|FLT4|MAPK3|PAX8|KDR|CUL3|FGF2|DNMT3A|SRF|IDE|RB1|TP53|ERBB2|CCNA2|EGFR|IGFBP1|VPS26B|FLT1|WNT3A|APP|AKR1B1|PPARG|KIT|HK2|FGFR4|BAX|PSME3|WNT1|PRKCI|H2AFZ|HSPA9|IGF…	202	663|809|813|1435|1301|451|781|1237|835|1441|871|337|437|377|1195|679|1427|1407|851|831|1281|241|1519|475|317|765|1113|685|1155|509|1395|523|861|1361|1259|461|843|271|557|251|641|933|1527|371|1481|1161|551|1223|1485|787|865|741|979|969|1279|1385|1387|265|361|769|459|723|727|807|1403|229|675|303|349|973|1473|983|545|453|895|301|855|1429|1503|501|911|909|1471|683|1483|997|1057|1177|443|925|1533|849|…	8.23e-22		GO:0071310	2091364016932525	0
1318	124	Reactome Pathways		RNA Polymerase II Transcription	1.37e-19	C12orf5|SNRPD3|MAPK1|PAPOLA|AGO2|PPP2CB|GCK|NFKB1|CCND1|SKP1|CPSF3|SYMPK|PIN1|YWHAH|APOE|G6PC|LGALS3|SCO1|CCNA1|KRAS|CCNB1|CDK4|MDM2|THOC1|RBL2|AXIN1|MAPK3|AKT3|YWHAE|SNRPF|RB1|TP53|ERBB2|SNRPG|CCNA2|EGFR|IGFBP1|MTA2|MYL9|PPARG|KIT|SSU72|BAX|PSME3|H2AFZ|CPSF2|YWHAG|CYCS|H2AFV|INTS6|PPARD|PPP2R1B|SUZ12|MET|PRMT5|SNAPC5|PPP2R1A|GSK3B|CUL1|INTS5|HIST1H2AJ|HIST2H2AC|HDAC6|FIP1L1|PTPN11|SFN|HIST1H2AD|…	202	1521|773|809|1513|1097|729|871|437|377|1195|1265|1497|609|831|1041|475|1039|869|671|317|685|1395|523|783|1415|1383|933|273|1001|1421|787|865|741|417|979|969|1279|1459|779|459|723|395|1403|229|349|1467|895|873|839|1539|855|1495|285|637|941|1205|1163|1177|925|541|789|1391|493|1545|1285|439|931|989|569|485|1351|275|747|617|593|785|1019|945|923|549|267|651|815|657|1197|1009|929|1337|1229|833|283|877|…	5.67e-22		HSA-73857	2.08633e+16	0
31	26	Reactome Pathways		Disassembly of the destruction complex and recruitment of AXIN to the membrane	1.38e-19	DVL2|PPP2R5B|PPP2CB|LRP6|PPP2R5A|AXIN1|WNT3A|FZD1|WNT1|LRP5|PPP2R1B|DVL3|FZD2|PPP2R1A|GSK3B|PPP2R5E|WNT8B|CTNNB1|FRAT2|FRAT1|DVL1|PPP2R5C|PPP2R5D|PPP2CA|CSNK1A1|WNT8A	202	431|663|729|1361|1349|1383|265|503|675|445|1495|581|817|1163|1177|1389|245|989|311|321|1211|799|1135|379|745|1207	6.35e-22		HSA-4641262	2.08601e+16	0
1831	150	GO Biological Process		Positive regulation of signaling	2.39e-19	DVL2|PPP2R5B|MAPK1|CSK|GCK|VTN|NFKB1|IGFBP5|PPP3R1|APOA1|TARDBP|C3|PIN1|STYXL1|YWHAH|SNX4|RAF1|APOE|KRAS|MBD2|PDGFRA|SLC6A4|PDGFRB|FLT4|AXIN1|MAP2K2|MAPK3|KDR|YWHAE|FGF2|PPP2R3A|EGF|HPX|ERBB3|NKD1|TP53|ERBB2|IGFBP4|EGFR|FLT1|WNT3A|APP|RHOC|AKR1B1|KIT|BRAF|FGFR4|BAX|PSME3|WNT1|PRKCI|FABP5|VPS35|IGFBP6|MAP2K1|IGF1|INSR|HINT1|CTNNA1|IRS1|YWHAG|F2|PPARD|PPP2R1B|MID1|VAMP2|CLU|DVL3|MET|PRMT5|F2R|UBE2O…	202	431|663|809|1237|871|505|437|1407|585|583|1107|1445|609|711|831|433|241|1041|317|1113|509|843|557|641|1383|821|933|371|1001|1161|1365|577|1493|715|867|865|741|335|969|1387|265|361|279|769|723|1257|807|1403|229|675|303|1105|1021|1293|409|1473|983|387|545|453|895|579|855|1495|1503|501|313|581|637|941|1127|1531|1057|1163|1177|1523|837|915|329|1323|1285|439|1151|989|521|1509|397|605|593|699|827|1319|…	1.64e-21		GO:0023056	2062160209905186	0
952	102	GO Biological Process		Protein phosphorylation	2.58e-19	MAPK1|CTSG|CSK|RPS6KB1|NFKB1|CCND1|SKP1|LIPE|MYOD1|RAF1|KRAS|EIF2S1|CCNB1|PDGFRA|CDK4|PDGFRB|FLT4|MAP2K2|MAPK3|AKT3|KDR|YWHAE|CUL3|FGF2|EGF|ERBB3|ERBB2|CCNA2|RASA1|EGFR|FLT1|APP|KIT|BRAF|ARAF|FGFR4|PSME3|PRKCI|PLK1|MAP2K1|BUB1|IGF1|INSR|IRS1|RPS6KB2|MAPK7|MET|SH2D3C|ULK1|GSK3B|STK25|CUL1|CALCA|LCK|FGFR3|ERBB4|FYN|IGF2R|TGFBR2|MTOR|NRAS|IRAK1|MKNK1|YWHAB|SRC|IRS2|MASTL|STK24|PRKCZ|RIOK1|TEK|PTPRA|…	202	809|1301|1237|337|437|377|1195|863|1281|241|317|765|685|509|1395|557|641|821|933|273|371|1001|1481|1161|577|715|741|979|1035|969|1387|361|723|1257|819|807|229|303|299|409|1511|1473|983|453|619|1429|637|1247|1433|1177|1523|925|849|915|1323|1151|1509|483|1487|593|1451|945|249|923|815|1411|1295|247|415|687|1215|1479|1229|283|877|1271|399|1363|1449|913|1143|749|1375|1067|1189|457|995|1123|803|277|497…	1.79e-21		GO:0006468	2058838029403677	0
289	56	Reactome Pathways		RHO GTPase Effectors	2.9e-20	DVL2|PPP2R5B|MAPK1|PPP2CB|PIN1|YWHAH|PPP2R5A|CDH1|MAPK3|SGOL1|YWHAE|SRF|MYL9|RHOC|H2AFZ|PLK1|BUB1|CTNNA1|YWHAG|H2AFV|PPP2R1B|KLK2|KLK3|DVL3|PPP2R1A|HIST1H2AJ|HIST2H2AC|PPP2R5E|SFN|HIST1H2AD|PPP1CC|CTNNB1|MKL1|CDC20|YWHAB|SRC|AR|HIST1H2AC|PRKCZ|DVL1|YWHAQ|GRB2|PPP1CB|YWHAZ|MYH11|PPP1R12A|RHOA|PRKCA|PPP2R5C|NCK1|PPP2R5D|PPP2CA|H2AFX|H2AFJ|H2AFB1|MIS12	202	431|663|809|729|609|831|1349|271|933|465|1001|1223|779|279|349|299|1511|545|895|839|1495|1275|257|581|1163|789|1391|1389|439|931|881|989|1005|625|923|815|1197|1009|415|1211|833|1271|1277|1143|1267|1055|1157|497|799|517|1135|379|1145|1027|1243|943	1.47e-21		HSA-195258	2053760200210104	0
120	38	KEGG Pathways		Oocyte meiosis	2.94e-19	PPP2R5B|MAPK1|PPP2CB|SKP1|PPP3R1|YWHAH|CCNB1|PPP2R5A|MAPK3|SGOL1|YWHAE|PLK1|MAP2K1|BUB1|IGF1|YWHAG|PPP2R1B|PPP2R1A|PPP1CA|CUL1|PPP2R5E|PPP1CC|CDC20|YWHAB|AR|YWHAQ|PPP3CB|PPP3CA|CDK1|PPP1CB|YWHAZ|INS|FBXO43|PPP2R5C|PPP2R5D|PPP2CA|CDC27|REC8	202	663|809|729|1195|585|831|685|1349|933|465|1001|299|409|1511|1473|895|1495|1163|837|925|1389|881|625|923|1197|833|1363|1371|1449|1277|1143|1457|1453|799|1135|379|367|1213	1.49e-20		hsa04114	2.05317e+16	0
280	55	Reactome Pathways		MAPK1/MAPK3 signaling	3.83e-19	PPP2R5B|MAPK1|CSK|PPP2CB|RAF1|KRAS|PDGFRA|PPP2R5A|PDGFRB|MAP2K2|MAPK3|CUL3|FGF2|EGF|ERBB3|ERBB2|RASA1|EGFR|KIT|BRAF|ARAF|FGFR4|PSME3|MAP2K1|IRS1|PPP2R1B|MET|PPP2R1A|PPP2R5E|FGFR3|PTPN11|PPP1CC|ERBB4|FYN|SHOC2|NRAS|YWHAB|SRC|IRS2|TEK|PTPRA|GRB2|CDK1|PPP1CB|KSR1|FGFR1|SHC1|ARRB2|HRAS|ARRB1|FGFR2|MARK3|PPP2R5C|PPP2R5D|PPP2CA	202	663|809|1237|729|241|317|509|1349|557|821|933|1481|1161|577|715|741|1035|969|723|1257|819|807|229|409|453|1495|637|1163|1389|1323|1285|881|1151|1509|1325|1451|923|815|1411|1215|1479|1271|1449|1277|1375|1123|803|887|277|701|977|953|799|1135|379	2.11e-21		HSA-5684996	2041680122603138	0
1823	149	GO Biological Process		Positive regulation of cell communication	4.25e-19	DVL2|PPP2R5B|MAPK1|CSK|GCK|VTN|NFKB1|IGFBP5|PPP3R1|APOA1|TARDBP|C3|PIN1|STYXL1|YWHAH|SNX4|RAF1|APOE|KRAS|MBD2|PDGFRA|SLC6A4|PDGFRB|FLT4|AXIN1|MAP2K2|MAPK3|KDR|YWHAE|FGF2|PPP2R3A|EGF|HPX|ERBB3|NKD1|TP53|ERBB2|IGFBP4|EGFR|FLT1|WNT3A|APP|RHOC|AKR1B1|KIT|BRAF|FGFR4|BAX|PSME3|WNT1|PRKCI|FABP5|VPS35|IGFBP6|MAP2K1|IGF1|INSR|HINT1|CTNNA1|IRS1|YWHAG|F2|PPARD|PPP2R1B|MID1|VAMP2|CLU|DVL3|MET|PRMT5|F2R|UBE2O…	202	431|663|809|1237|871|505|437|1407|585|583|1107|1445|609|711|831|433|241|1041|317|1113|509|843|557|641|1383|821|933|371|1001|1161|1365|577|1493|715|867|865|741|335|969|1387|265|361|279|769|723|1257|807|1403|229|675|303|1105|1021|1293|409|1473|983|387|545|453|895|579|855|1495|1503|501|313|581|637|941|1127|1531|1057|1163|1177|1523|837|915|329|1323|1285|439|1151|989|1509|397|605|593|699|827|1319|1233…	2.98e-21		GO:0010647	2037161106994969	0
105	37	Reactome Pathways		PI5P, PP2A and IER3 Regulate PI3K/AKT Signaling	4.34e-19	PPP2R5B|MAPK1|PPP2CB|PDGFRA|PPP2R5A|PDGFRB|MAPK3|STRN|FGF2|EGF|ERBB3|ERBB2|EGFR|KIT|FGFR4|INSR|IRS1|PPP2R1B|MET|PPP2R1A|PPP2R5E|LCK|FGFR3|PTPN11|ERBB4|FYN|IRAK1|SRC|IRS2|GRB2|INS|FGFR1|FGFR2|PPP2R5C|PPP2R5D|PPP2CA|AKT1	202	663|809|729|509|1349|557|933|793|1161|577|715|741|969|723|807|983|453|1495|637|1163|1389|915|1323|1285|1151|1509|945|815|1411|1271|1457|1123|977|799|1135|379|1231	2.6e-22		HSA-6811558	2036251027048749	0
2257	170	GO Biological Process		Positive regulation of response to stimulus	5.59e-19	DVL2|PPP2R5B|C12orf5|PPP1R15A|APOH|MAPK1|CTSG|CSK|VTN|NFKB1|SKP1|IGFBP5|PPP3R1|APOA1|C3|PIN1|STYXL1|YWHAH|FXR2|SNX4|RAF1|APOE|FUS|KRAS|MBD2|PDGFRA|PDGFRB|FLT4|AXIN1|MAP2K2|MAPK3|KDR|YWHAE|FGF2|PPP2R3A|EGF|HPX|ERBB3|NKD1|TP53|ERBB2|IGFBP4|PLA2G7|EGFR|FLT1|WNT3A|APP|RHOC|AKR1B1|KIT|BRAF|FGFR4|BAX|PSME3|WNT1|PRKCI|FABP5|VPS35|IGFBP6|MAP2K1|IGF1|INSR|HINT1|CTNNA1|IRS1|YWHAG|CXCL8|F2|PLG|PPARD|PPP2R1B…	202	431|663|1521|739|239|809|1301|1237|505|437|1195|1407|585|583|1445|609|711|831|1249|433|241|1041|1199|317|1113|509|557|641|1383|821|933|371|1001|1161|1365|577|1493|715|867|865|741|335|1283|969|1387|265|361|279|769|723|1257|807|1403|229|675|303|1105|1021|1293|409|1473|983|387|545|453|895|301|579|281|855|1495|1503|313|581|637|941|909|1127|1531|1057|1163|1177|1523|837|925|1355|493|915|329|1323|1285|4…	3.96e-21		GO:0048584	2025258819211358	0
319	58	Reactome Pathways		MAPK family signaling cascades	5.75e-19	PPP2R5B|MAPK1|CSK|AGO2|PPP2CB|RAF1|KRAS|PDGFRA|PPP2R5A|PDGFRB|MAP2K2|MAPK3|CUL3|FGF2|EGF|ERBB3|ERBB2|RASA1|EGFR|KIT|BRAF|ARAF|IGF2BP1|FGFR4|PSME3|MAP2K1|IRS1|PPP2R1B|MET|PPP2R1A|PPP2R5E|FGFR3|PTPN11|PPP1CC|ERBB4|FYN|SHOC2|NRAS|YWHAB|SRC|IRS2|TEK|PTPRA|GRB2|CDK1|PPP1CB|KSR1|FGFR1|SHC1|ARRB2|HRAS|ARRB1|FGFR2|MARK3|PPP2R5C|PPP2R5D|PPP2CA|MYC	202	663|809|1237|1097|729|241|317|509|1349|557|821|933|1481|1161|577|715|741|1035|969|723|1257|819|693|807|229|409|453|1495|637|1163|1389|1323|1285|881|1151|1509|1325|1451|923|815|1411|1215|1479|1271|1449|1277|1375|1123|803|887|277|701|977|953|799|1135|379|391	3.71e-21		HSA-5683057	2.02403e+16	0
296	56	Reactome Pathways		Signaling by WNT	5.87e-19	DVL2|PPP2R5B|AGO2|PPP2CB|SKP1|PPP3R1|KRAS|LRP6|PPP2R5A|AXIN1|CUL3|WNT3A|FZD1|PSME3|WNT1|LRP5|H2AFZ|VPS35|H2AFV|PPP2R1B|DVL3|FZD2|PPP2R1A|GSK3B|CUL1|HIST1H2AJ|HIST2H2AC|PPP2R5E|WNT8B|HIST1H2AD|CTNNB1|FRAT2|FRAT1|VPS26A|HDAC1|HIST1H2AC|DVL1|AKT2|PPP3CB|PPP3CA|YWHAZ|SMARCA4|RHOA|ARRB2|PRKCA|PPP2R5C|PPP2R5D|PPP2CA|CSNK1A1|WNT8A|H2AFX|H2AFJ|AKT1|MYC|VPS29|H2AFB1	202	431|663|1097|729|1195|585|317|1361|1349|1383|1481|265|503|229|675|445|349|1021|839|1495|581|817|1163|1177|925|789|1391|1389|245|931|989|311|321|319|651|1009|1211|877|1363|1371|1143|635|1157|887|497|799|1135|379|745|1207|1145|1027|1231|391|253|1243	4.05e-21		HSA-195721	2.02314e+16	0
5633	312	GO Biological Process		Cellular component organization or biogenesis	5.94e-19	M6PR|DVL2|PPP1R15A|CETP|SF3A1|SNRPD3|MAPK1|MICALL1|CTSG|MMP2|CSK|AGO2|PPP2CB|FBL|VTN|APOC3|SKP1|APOB|PPP3R1|WDR77|APOA1|TTR|TARDBP|HIST1H4F|PIN1|YWHAH|STRIP2|MYOD1|RAF1|APOE|PPFIA1|FUS|SCO1|CCNA1|KRAS|EIF2S1|MBD2|CCNB1|SORT1|PDGFRA|CDK4|MDM2|DNAJC13|COX17|LRP6|PPP2R3C|CDH1|PDGFRB|SNX1|RBL2|AXIN1|SRCAP|MAPK3|SMG6|SGOL1|AKT3|STRN|KDR|LCAT|CTCF|YWHAE|CUL3|FGF2|DNMT3A|RAB7A|EGF|TRPV5|SRF|IDE|SNRPF|RB…	202	1343|431|739|655|411|773|809|813|1301|781|1237|1097|729|1353|505|429|1195|679|585|1393|583|1303|1107|1131|609|831|481|1281|241|1041|479|1199|869|671|317|765|1113|685|1155|509|1395|523|667|991|1361|1379|271|557|289|1415|1383|499|933|1085|465|273|793|371|963|957|1001|1481|1161|551|633|577|1059|1223|1485|1421|787|865|741|1095|527|417|1023|979|1035|1283|969|1459|1173|265|361|279|495|1347|1261|503|723…	4.25e-21		GO:0071840	2.02262e+16	0
2429	178	GO Biological Process		Negative regulation of nitrogen compound metabolic process	6.27e-19	C12orf5|PPP1R15A|CSK|AGO2|PLAT|VTN|NFKB1|CCND1|IGFBP5|ENO1|EGR1|TARDBP|HIST1H4F|C3|PIN1|STYXL1|FXR2|RAF1|APOE|PPP1R1B|FUS|LGALS3|SCO1|EIF2S1|MBD2|CCNB1|PPP1R1A|MDM2|IGF2BP3|LRP6|IPO5|THOC1|SMG6|CTCF|YWHAE|CUL3|DNMT3A|AMBP|SRF|IDE|RB1|TP53|EGFR|MTA2|APP|PPARG|FZD1|IGF2BP1|BAX|WNT1|LRP5|FABP1|H2AFZ|ABCE1|HIST1H2AA|VPS35|PLK1|IGF1|PPP4R4|YWHAG|H2AFV|F2|PPARD|PABPC1|CLU|SUZ12|PRMT5|MLXIPL|LPA|UBE2O|P…	202	1521|739|1237|1097|529|505|437|377|1407|767|851|1107|1131|1445|609|711|1249|241|1041|751|1199|1039|869|765|1113|685|1399|523|1101|1361|461|783|1085|957|1001|1481|551|1083|1223|1485|787|865|969|1459|361|459|503|693|1403|675|445|631|349|1469|1103|1021|299|1473|1491|895|839|579|855|513|313|285|941|683|999|1531|1163|1177|789|607|849|1391|493|369|329|717|883|901|1297|439|931|355|713|989|521|1509|1003|…	4.53e-21		GO:0051172	2020273245916928	0
518	73	Reactome Pathways		Cell Cycle, Mitotic	7.54e-19	PPP2R5B|MAPK1|PPP2CB|CCND1|SKP1|CCNA1|CCNB1|CDK4|LMNB1|PPP2R5A|RBL2|MAPK3|SGOL1|AKT3|YWHAE|RB1|TP53|CCNA2|PSME3|H2AFZ|RAD21|PLK1|BUB1|YWHAG|H2AFV|BANF1|PPP2R1B|PPP2R1A|GSK3B|PPP2R2A|CUL1|HIST1H2AJ|HIST2H2AC|PPP2R5E|HIST1H2AD|PPP1CC|FOXM1|ANKLE2|MAX|DCTN1|FGFR1OP|LMNA|CDC20|SET|RBBP4|HDAC1|SRC|RBL1|MASTL|HIST1H2AC|PPP2R3B|AKT2|CDK1|PPP1CB|PPME1|LCMT1|PPP1R12A|PPP2R2D|PRKCA|PPP2R5C|CDKN1C|PPP2R5D|P…	202	663|809|729|377|1195|671|685|1395|1259|1349|1415|933|465|273|1001|787|865|979|229|349|1287|299|1511|895|839|1423|1495|1163|1177|879|925|789|1391|1389|931|881|713|393|747|615|907|519|625|563|267|651|815|657|1295|1009|1475|877|1449|1277|1079|797|1055|845|497|799|665|1135|379|1111|1145|367|1027|1231|547|1209|391|1243|943	5.55e-21		HSA-69278	2.01226e+16	0
1642	139	GO Biological Process		Regulation of cell population proliferation	8.8e-20	DVL2|APOH|MAPK1|MMP2|CSK|CCND1|IGFBP2|IGFBP5|WDR77|FAM98A|EGR1|MYOD1|RAF1|APOE|LGALS3|KRAS|MBD2|CCNB1|PDGFRA|CDK4|MDM2|COX17|LRP6|SLC6A4|PDGFRB|FLT4|MAPK3|AKT3|STRN|KDR|CTCF|CUL3|FGF2|EGF|SRF|ERBB3|RB1|TP53|ERBB2|FTH1|CCNA2|EGFR|FLT1|WNT3A|APP|AKR1B1|PPARG|KIT|FGFR4|BAX|WNT1|LRP5|PRKCI|IFT122|IGFBP6|MAP2K1|IGF1|INSR|CTNNA1|IRS1|CXCL8|F2|PLG|PPARD|CLU|SUZ12|CXCR2|MLXIPL|F2R|HGS|LCK|FGFR3|SFN|PPP1C…	202	431|239|809|781|1237|377|1427|1407|1393|759|851|1281|241|1041|1039|317|1113|685|509|1395|523|991|1361|843|557|641|933|273|793|371|957|1481|1161|577|1223|715|787|865|741|405|979|969|1387|265|361|769|459|723|807|1403|675|445|303|1367|1293|409|1473|983|545|453|301|579|281|855|313|285|909|683|1127|559|915|1323|439|881|1151|713|989|591|521|1509|1487|605|593|907|1017|519|589|237|1451|1093|1071|945|625|…	6.44e-21		GO:0042127	2005551732784983	0
4114	250	GO Biological Process		Regulation of response to stimulus	2.59e-18	DVL2|PPP2R5B|C12orf5|PPP1R15A|APOH|UNC13D|MAPK1|CTSG|CSK|PLAT|PPP2CB|RPS6KB1|VTN|NFKB1|APOC3|SKP1|IGFBP2|IGFBP5|PPP3R1|ENO1|APOA1|EGR1|C3|PIN1|STYXL1|YWHAH|MYOD1|FXR2|SNX4|RAF1|APOE|FUS|LGALS3|KRAS|MBD2|PDGFRA|CDK4|MDM2|LRP6|PPP2R3C|THOC1|PDGFRB|CILP|FLT4|AXIN1|MAP2K2|MAPK3|AKT3|KDR|YWHAE|CUL3|FGF2|PPP2R3A|RAB7A|AMBP|EGF|HPX|ERBB3|RB1|NKD1|TP53|ERBB2|IGFBP4|RASA1|PLA2G7|EGFR|IGFBP1|MTA2|PPP4C|FLT…	202	431|663|1521|739|239|1461|809|1301|1237|529|729|337|505|437|429|1195|1427|1407|585|767|583|851|1445|609|711|831|1281|1249|433|241|1041|1199|1039|317|1113|509|1395|523|1361|1379|783|557|251|641|1383|821|933|273|371|1001|1481|1161|1365|633|1083|577|1493|715|787|867|865|741|335|1035|1283|969|1279|1459|775|1387|265|361|279|769|459|503|723|1257|819|807|1403|229|675|445|303|1367|1469|1105|1021|1293|409…	1.93e-20		GO:0048583	1.95867e+16	0
274	53	Reactome Pathways		RAF/MAP kinase cascade	3.27e-18	PPP2R5B|MAPK1|CSK|PPP2CB|RAF1|KRAS|PDGFRA|PPP2R5A|PDGFRB|MAP2K2|MAPK3|CUL3|FGF2|EGF|ERBB3|ERBB2|RASA1|EGFR|KIT|BRAF|ARAF|FGFR4|PSME3|MAP2K1|IRS1|PPP2R1B|MET|PPP2R1A|PPP2R5E|FGFR3|PPP1CC|ERBB4|FYN|SHOC2|NRAS|YWHAB|SRC|IRS2|TEK|PTPRA|GRB2|PPP1CB|KSR1|FGFR1|SHC1|ARRB2|HRAS|ARRB1|FGFR2|MARK3|PPP2R5C|PPP2R5D|PPP2CA	202	663|809|1237|729|241|317|509|1349|557|821|933|1481|1161|577|715|741|1035|969|723|1257|819|807|229|409|453|1495|637|1163|1389|1323|881|1151|1509|1325|1451|923|815|1411|1215|1479|1271|1277|1375|1123|803|887|277|701|977|953|799|1135|379	2.56e-20		HSA-5673001	1.94855e+16	0
875	95	GO Biological Process		Regulation of cellular catabolic process	4.12e-18	C12orf5|AGO2|APOC3|PFKFB4|APOA1|TARDBP|FXR2|APOE|FUS|SCO1|MDM2|IGF2BP3|AXIN1|MAPK3|KDR|CUL3|EGF|VDAC1|RB1|TP53|RAB5A|VPS26B|APP|ARAF|IGF2BP1|HK2|BAX|PSME3|WNT1|FABP1|VPS35|PLK1|IGF1|INSR|IRS1|COMMD1|SNX32|PABPC1|CLU|MET|MLXIPL|ULK1|GSK3B|HNRNPM|PPP1CA|ATP6V0A2|HDAC6|ATG101|MAPT|ANXA2|HP|ELAVL4|FXR1|APOA4|VCP|MTOR|SNX6|PARK2|PFKFB2|YTHDF1|FMR1|CDC20|YBX1|SET|YWHAB|PABPC4|VPS26A|PFKFB1|IRS2|SNX5|DV…	202	1521|1097|429|587|583|1107|1249|1041|1199|869|523|1101|1383|933|371|1481|577|967|787|865|1023|1385|361|819|693|727|1403|229|675|631|1021|299|1473|983|453|1191|565|513|313|637|683|1433|1177|443|837|949|493|1305|1297|521|875|343|707|463|397|593|1061|699|1319|691|951|625|1099|563|923|955|319|1335|1411|447|1211|877|1373|1013|1043|1277|913|1143|1457|749|413|497|1397|1329|1073|745|367|231|689|1231|885|…	3.11e-20		GO:0031329	1.93851e+16	0
1654	138	GO Biological Process		Positive regulation of signal transduction	4.38e-18	DVL2|PPP2R5B|MAPK1|CSK|VTN|NFKB1|IGFBP5|PPP3R1|APOA1|C3|PIN1|STYXL1|YWHAH|RAF1|APOE|KRAS|MBD2|PDGFRA|PDGFRB|FLT4|AXIN1|MAP2K2|MAPK3|KDR|YWHAE|FGF2|PPP2R3A|EGF|HPX|ERBB3|NKD1|TP53|ERBB2|IGFBP4|EGFR|FLT1|WNT3A|APP|RHOC|AKR1B1|KIT|BRAF|FGFR4|BAX|PSME3|WNT1|PRKCI|FABP5|VPS35|IGFBP6|MAP2K1|IGF1|INSR|HINT1|CTNNA1|IRS1|YWHAG|F2|PPARD|PPP2R1B|MID1|CLU|DVL3|MET|PRMT5|F2R|UBE2O|TRIM25|PPP2R1A|GSK3B|STK25|P…	202	431|663|809|1237|505|437|1407|585|583|1445|609|711|831|241|1041|317|1113|509|557|641|1383|821|933|371|1001|1161|1365|577|1493|715|867|865|741|335|969|1387|265|361|279|769|723|1257|807|1403|229|675|303|1105|1021|1293|409|1473|983|387|545|453|895|579|855|1495|1503|313|581|637|941|1127|1531|1057|1163|1177|1523|837|915|329|1323|1285|439|1151|989|1509|397|605|593|699|827|1233|1325|945|561|321|923|815|…	3.34e-20		GO:0009967	1.93585e+16	0
124	38	Reactome Pathways		Regulation of Insulin-like Growth Factor (IGF) transport and uptake by Insulin-like Growth Factor Binding Proteins (IGFBPs)	4.68e-18	CTSG|GZMH|MMP2|SCG3|APOB|IGFBP2|IGFBP5|APOA1|C3|APOE|CP|IGFBP4|IGFBP1|APP|ALB|KLK1|IGFBP6|IGF1|F2|PLG|KLK2|KLK3|APOL1|MMP1|P4HB|PAPPA|ITIH2|PAPPA2|APOA2|IGFBP3|GPC3|TF|IGF2|AHSG|SERPINA1|IGFALS|APOA5|KLK13	202	1301|1341|781|1169|679|1427|1407|583|1445|1041|1339|335|1279|361|515|1431|1293|1473|579|281|1275|257|331|997|1533|903|1139|1179|639|1229|287|1189|401|939|531|1299|689|1147	3.88e-20		HSA-381426	1.93298e+16	0
1696	140	GO Biological Process		Regulation of cell death	5.02e-18	C12orf5|APOH|RPS6KB1|NFKB1|PPP3R1|ENO1|EGR1|TARDBP|PIN1|STYXL1|YWHAH|RAF1|APOE|LGALS3|KRAS|EIF2S1|SORT1|CDK4|MDM2|LRP6|PDGFRB|FLT4|PAX8|KDR|YWHAE|FGF2|DNMT3A|ERBB3|RB1|TP53|RASA1|EGFR|WNT3A|APP|AKR1B1|PPARG|FZD1|KIT|BRAF|ARAF|BAX|PSME3|WNT1|LRP5|PRKCI|FABP1|ALB|HSPA9|VPS35|PLK1|IGF1|CTNNA1|YWHAG|CYCS|PPARD|MAPK7|PPP2R1B|CLU|MET|TCP1|CXCR2|F2R|UBE2O|PPP2R1A|GSK3B|PPP1CA|P4HB|HDAC6|LCK|PLAUR|MAPT|S…	202	1521|239|337|437|585|767|851|1107|609|711|831|241|1041|1039|317|765|1155|1395|523|1361|557|641|1527|371|1001|1161|551|715|787|865|1035|969|265|361|769|459|503|723|1257|819|1403|229|675|445|303|631|515|973|1021|299|1473|545|895|873|855|1429|1495|313|637|911|909|1127|1531|1163|1177|837|1533|493|915|329|1297|439|1151|989|985|1509|875|483|393|397|605|593|1061|699|827|519|1093|945|563|923|651|815|889|…	3.87e-20		GO:0010941	1.92993e+16	0
538	73	GO Biological Process		Response to inorganic substance	5.23e-18	C12orf5|MAPK1|PPP2CB|PON1|CCND1|APOB|IGFBP2|ATP7B|FUS|EIF2S1|CCNB1|CDK4|MDM2|KHK|CDH1|PDGFRB|SLC30A4|MAPK3|KDR|DNMT3A|SORD|CCNA2|EGFR|APP|AKR1B1|KIT|BRAF|FABP1|KCNK3|MAPK7|STK25|PPP1CA|HDAC6|PKLR|MAPT|ATP7A|FYN|HP|APOA4|VCP|TRPV6|ACTA1|PARK2|PPP1R15B|FMR1|ANXA7|MTF1|SRC|STK24|ANXA1|FKBP1B|FECH|PDCD10|G6PD|MST4|BAD|PPP3CA|SLC11A2|CDK1|MB|BCL2|RELA|TF|FBP1|HFE|PPP2CA|TFR2|HDAC2|NTRK1|CCS|LDHA|AKT1|…	202	1521|809|729|841|377|679|1427|1309|1199|765|685|1395|523|425|271|557|375|933|371|551|1543|979|969|361|769|723|1257|631|1115|1429|1523|837|493|1419|1297|591|1509|875|463|397|695|603|699|1369|951|365|357|815|247|1405|643|677|255|1045|399|1043|1371|1507|1449|1117|749|389|1189|647|1329|379|435|421|467|1165|971|1231|847	4.07e-20		GO:0010035	1.92815e+16	0
116	36	KEGG Pathways		Sphingolipid signaling pathway	6.43e-18	PPP2R5B|MAPK1|PPP2CB|NFKB1|RAF1|KRAS|PPP2R5A|PPP2R3C|MAP2K2|MAPK3|AKT3|PPP2R3A|TP53|BAX|MAP2K1|PPP2R1B|PPP2R1A|PPP2R2A|PPP2R2C|PPP2R5E|FYN|NRAS|PRKCZ|PPP2R3B|AKT2|PPP2R2B|BCL2|RELA|PPP2R2D|RHOA|HRAS|PRKCA|PPP2R5C|PPP2R5D|PPP2CA|AKT1	202	663|809|729|437|241|317|1349|1379|821|933|273|1365|865|1403|409|1495|1163|879|325|1389|1509|1451|415|1475|877|859|749|389|845|1157|277|497|799|1135|379|1231	3.45e-19		hsa04071	1.91918e+16	0
1455	127	Reactome Pathways		Gene expression (Transcription)	7.36e-18	C12orf5|SNRPD3|MAPK1|PAPOLA|AGO2|PPP2CB|GCK|NFKB1|CCND1|SKP1|CPSF3|SYMPK|PIN1|YWHAH|APOE|G6PC|LGALS3|SCO1|CCNA1|KRAS|MBD2|CCNB1|CDK4|MDM2|THOC1|RBL2|AXIN1|MAPK3|AKT3|YWHAE|DNMT3A|SNRPF|RB1|TP53|ERBB2|SNRPG|CCNA2|EGFR|IGFBP1|MTA2|MYL9|PPARG|KIT|SSU72|BAX|PSME3|H2AFZ|CPSF2|YWHAG|CYCS|H2AFV|INTS6|PPARD|PPP2R1B|SUZ12|MET|PRMT5|SNAPC5|PPP2R1A|GSK3B|CUL1|INTS5|HIST1H2AJ|HIST2H2AC|HDAC6|FIP1L1|PTPN11|SF…	202	1521|773|809|1513|1097|729|871|437|377|1195|1265|1497|609|831|1041|475|1039|869|671|317|1113|685|1395|523|783|1415|1383|933|273|1001|551|1421|787|865|741|417|979|969|1279|1459|779|459|723|395|1403|229|349|1467|895|873|839|1539|855|1495|285|637|941|1205|1163|1177|925|541|789|1391|493|1545|1285|439|931|989|569|485|1351|525|275|747|617|593|785|1019|945|923|549|267|651|815|657|1197|1009|929|1337|1229…	6.43e-20		HSA-74160	1.91331e+16	0
624	78	GO Biological Process		Positive regulation of kinase activity	1.64e-17	DVL2|C12orf5|MAPK1|CSK|CCND1|EGR1|RAF1|KRAS|CCNB1|PDGFRA|PPP2R3C|PDGFRB|FLT4|AXIN1|MAP2K2|MAPK3|KDR|FGF2|EGF|ERBB3|ERBB2|EGFR|FLT1|WNT3A|APP|KIT|BRAF|FGFR4|IGFBP6|MAP2K1|IGF1|INSR|IRS1|F2|CLU|DVL3|MET|F2R|STK25|CALCA|FGFR3|MAPT|PTPN11|ERBB4|FYN|TGFBR2|MTOR|PFKFB2|FCGR1A|IRAK1|SRC|PFKFB1|STK24|SPRY2|PRKCZ|TEK|SNX9|PDCD10|MST4|BAD|CDK1|INS|KSR1|DDX3X|TF|IGF2|FGFR1|RHOA|SHC1|HRAS|ARRB1|FGFR2|PPP2CA|…	202	431|1521|809|1237|377|851|241|317|685|509|1379|557|641|1383|821|933|371|1161|577|715|741|969|1387|265|361|723|1257|807|1293|409|1473|983|453|579|313|581|637|1127|1523|849|1323|1297|1285|1151|1509|1487|593|1319|407|945|815|1335|247|1253|415|1215|1373|255|399|1043|1449|1457|1375|1499|1189|401|1123|1157|803|277|701|977|379|1111|1439|467|1231|1175	1.29e-19		GO:0033674	1.87852e+16	0
1489	128	GO Biological Process		Positive regulation of catalytic activity	1.83e-17	DVL2|PPP2R5B|C12orf5|PPP1R15A|APOH|MAPK1|CSK|CCND1|SKP1|APOA1|EGR1|PIN1|RAF1|APOE|KRAS|CCNB1|PDGFRA|COX17|PPP2R5A|PPP2R3C|PDGFRB|FLT4|AXIN1|MAP2K2|MAPK3|KDR|FGF2|EGF|ERBB3|ERBB2|RASA1|EGFR|FLT1|WNT3A|APP|RHOC|PPARG|KIT|BRAF|FGFR4|BAX|PSME3|FABP1|CCT2|PLK1|IGFBP6|MAP2K1|IGF1|INSR|IRS1|CYCS|F2|CLU|DVL3|MET|TCP1|F2R|GSK3B|STK25|CALCA|ATP4B|PPP2R5E|LCK|FGFR3|MAPT|PTPN11|ERBB4|CTNNB1|ATP7A|FYN|APOA4|V…	202	431|663|1521|739|239|809|1237|377|1195|583|851|609|241|1041|317|685|509|991|1349|1379|557|641|1383|821|933|371|1161|577|715|741|1035|969|1387|265|361|279|459|723|1257|807|1403|229|631|1075|299|1293|409|1473|983|453|873|579|313|581|637|911|1127|1177|1523|849|1463|1389|915|1323|1297|1285|1151|989|591|1509|463|397|1487|593|1319|1369|639|697|407|945|625|923|815|1335|1295|247|1253|415|1215|1229|877|13…	1.46e-19		GO:0043085	1873754891026957	0
1569	132	GO Biological Process		Regulation of programmed cell death	2.15e-17	C12orf5|APOH|RPS6KB1|NFKB1|PPP3R1|ENO1|EGR1|TARDBP|PIN1|STYXL1|YWHAH|RAF1|APOE|LGALS3|KRAS|EIF2S1|SORT1|CDK4|MDM2|LRP6|PDGFRB|FLT4|PAX8|KDR|YWHAE|ERBB3|RB1|TP53|RASA1|EGFR|WNT3A|APP|AKR1B1|PPARG|KIT|BRAF|ARAF|BAX|PSME3|WNT1|LRP5|PRKCI|FABP1|ALB|HSPA9|PLK1|IGF1|CTNNA1|YWHAG|CYCS|PPARD|MAPK7|PPP2R1B|CLU|MET|TCP1|CXCR2|F2R|UBE2O|PPP2R1A|GSK3B|PPP1CA|P4HB|HDAC6|LCK|PLAUR|MAPT|SFN|ERBB4|CTNNB1|CTSB|FY…	202	1521|239|337|437|585|767|851|1107|609|711|831|241|1041|1039|317|765|1155|1395|523|1361|557|641|1527|371|1001|715|787|865|1035|969|265|361|769|459|723|1257|819|1403|229|675|445|303|631|515|973|299|1473|545|895|873|855|1429|1495|313|637|911|909|1127|1531|1163|1177|837|1533|493|915|329|1297|439|1151|989|985|1509|483|393|397|605|593|1061|699|519|1093|945|563|923|651|815|889|1197|1411|539|1405|1253|41…	1.72e-19		GO:0043067	1.86676e+16	0
6489	339	GO Biological Process		Cellular response to stimulus	2.17e-17	DVL2|PPP2R5B|C12orf5|PPP1R15A|MAPK1|MICALL1|PMM1|CTSG|GZMH|GNPNAT1|MMP2|CSK|AGO2|TG|PLAT|PPP2CB|SLC5A5|FKBP14|GCK|RPS6KB1|NFKB1|CCND1|APOC3|SKP1|APOB|SNX17|IGFBP2|IGFBP5|PPP3R1|APOA1|TTR|EGR1|TARDBP|HIST1H4F|C3|STYXL1|YWHAH|MBD4|MYOD1|RAF1|APOE|GFPT2|G6PC|PPFIA1|PPP1R1B|FUS|LGALS3|KRAS|EIF2S1|MBD2|CCNB1|SORT1|PDGFRA|CDK4|PPP1R1A|MDM2|DERL1|LRP6|LMNB1|PPP2R5A|IPO5|THOC1|SLC6A4|CDH1|PDGFRB|CILP|FLT…	202	431|663|1521|739|809|813|1435|1301|1341|451|781|1237|1097|1417|529|729|835|1441|871|337|437|377|429|1195|679|573|1427|1407|585|583|1303|851|1107|1131|1445|711|831|599|1281|241|1041|1519|475|479|751|1199|1039|317|765|1113|685|1155|509|1395|1399|523|861|1361|1259|1349|461|783|843|271|557|251|641|1415|1383|821|933|1527|273|793|371|1001|1481|1161|551|1365|633|577|1223|1485|627|715|787|867|403|865|741…	1.75e-19		GO:0051716	1.86635e+16	0
41	25	KEGG Pathways		Bladder cancer	2.26e-17	MAPK1|MMP2|CCND1|RAF1|KRAS|CDK4|MDM2|CDH1|MAP2K2|MAPK3|EGF|RB1|TP53|ERBB2|EGFR|BRAF|ARAF|MAP2K1|CXCL8|MMP1|FGFR3|NRAS|SRC|HRAS|MYC	202	809|781|377|241|317|1395|523|271|821|933|577|787|865|741|969|1257|819|409|301|997|1323|1451|815|277|391	1.28e-18		hsa05219	186458915608526	0
1055	104	GO Biological Process		Cellular response to oxygen-containing compound	2.47e-17	MAPK1|CTSG|MMP2|CSK|SLC5A5|GCK|RPS6KB1|NFKB1|APOB|IGFBP5|EGR1|MYOD1|RAF1|G6PC|CCNB1|PDGFRA|CDK4|MDM2|LRP6|IPO5|SLC6A4|CDH1|PDGFRB|MAPK3|DNMT3A|SRF|IDE|TP53|CCNA2|EGFR|IGFBP1|WNT3A|APP|AKR1B1|PPARG|WNT1|PRKCI|FABP1|H2AFZ|IGF1|INSR|CTNNA1|IRS1|YWHAG|CXCL8|PPARD|MAPK7|VAMP2|PKM|MLXIPL|GSK3B|STK25|ATP6V0A2|HDAC6|PKLR|WNT8B|EIF4EBP1|MAPT|CTNNB1|ATP7A|FYN|APOA4|MAX|VCP|AKR1B10|MTOR|SNX6|PARK2|HTR1B|IRA…	202	809|1301|781|1237|835|871|337|437|679|1407|851|1281|241|475|685|509|1395|523|1361|461|843|271|557|933|551|1223|1485|865|979|969|1279|265|361|769|459|675|303|631|349|1473|983|545|453|895|301|855|1429|501|1471|683|1177|1523|949|493|1419|245|901|1297|989|591|1509|463|747|397|733|593|1061|699|1071|945|719|815|1197|1411|1405|415|1479|283|677|877|1271|255|553|1043|1371|1449|1457|731|389|401|1157|803|88…	2.02e-19		GO:1901701	1.86073e+16	0
150	39	KEGG Pathways		Cellular senescence	2.55e-17	MAPK1|NFKB1|CCND1|PPP3R1|RAF1|CCNA1|KRAS|CCNB1|CDK4|MDM2|RBL2|MAP2K2|MAPK3|AKT3|VDAC1|RB1|TP53|CCNA2|MAP2K1|CXCL8|PPP1CA|EIF4EBP1|PPP1CC|TGFBR2|MTOR|NRAS|RBBP4|RBL1|IGFBP3|AKT2|PPP3CB|PPP3CA|CDK1|PPP1CB|RELA|CHEK1|HRAS|AKT1|MYC	202	809|437|377|585|241|671|317|685|1395|523|1415|821|933|273|967|787|865|979|409|301|837|901|881|1487|593|1451|267|657|1229|877|1363|1371|1449|1277|389|457|277|1231|391	1.52e-18		hsa04218	1.85935e+16	0
1181	111	GO Biological Process		Cellular response to endogenous stimulus	2.72e-17	MAPK1|MICALL1|MMP2|CSK|SLC5A5|GCK|RPS6KB1|NFKB1|APOB|IGFBP2|IGFBP5|EGR1|YWHAH|MYOD1|G6PC|SORT1|PDGFRA|CDK4|MDM2|IPO5|SLC6A4|CDH1|PDGFRB|CILP|MAPK3|PAX8|FGF2|DNMT3A|IDE|RB1|TP53|ERBB2|CCNA2|EGFR|IGFBP1|APP|AKR1B1|PPARG|KIT|FGFR4|WNT1|PRKCI|IGF1|INSR|CTNNA1|IRS1|YWHAG|CXCL8|PPARD|MAPK7|VAMP2|PKM|GSK3B|HNRNPM|CALCA|ATP6V0A2|HFE2|FGFR3|PKLR|EIF4EBP1|MAPT|PTPN11|ERBB4|CTNNB1|CTSB|ATP7A|FYN|MAX|TGFBR2|…	202	809|813|781|1237|835|871|337|437|679|1427|1407|851|831|1281|475|1155|509|1395|523|461|843|271|557|251|933|1527|1161|551|1485|787|865|741|979|969|1279|361|769|459|723|807|675|303|1473|983|545|453|895|301|855|1429|501|1471|1177|443|849|949|369|1323|1419|901|1297|1285|1151|989|985|591|1509|747|1487|593|1061|603|699|237|1325|1071|719|815|1197|1411|1405|415|1479|677|877|1271|1013|327|1457|731|389|305|…	2.25e-19		GO:0071495	1.85654e+16	0
82	31	KEGG Pathways		Colorectal cancer	2.97e-17	MAPK1|RPS6KB1|CCND1|RAF1|KRAS|AXIN1|MAP2K2|MAPK3|AKT3|EGF|TP53|EGFR|BRAF|ARAF|BAX|MAP2K1|CYCS|RPS6KB2|GSK3B|CTNNB1|TGFBR2|MTOR|NRAS|AKT2|GRB2|BAD|BCL2|RHOA|HRAS|AKT1|MYC	202	809|337|377|241|317|1383|821|933|273|577|865|969|1257|819|1403|409|873|619|1177|989|1487|593|1451|877|1271|1043|749|1157|277|1231|391	1.85e-18		hsa05210	1.85272e+16	0
3107	204	GO Biological Process		Regulation of signal transduction	3.36e-17	DVL2|PPP2R5B|PPP1R15A|MAPK1|CSK|PPP2CB|RPS6KB1|VTN|NFKB1|APOC3|IGFBP2|IGFBP5|PPP3R1|ENO1|APOA1|EGR1|C3|PIN1|STYXL1|YWHAH|RAF1|APOE|LGALS3|KRAS|MBD2|PDGFRA|CDK4|MDM2|LRP6|PDGFRB|CILP|FLT4|AXIN1|MAP2K2|MAPK3|KDR|YWHAE|CUL3|FGF2|PPP2R3A|RAB7A|AMBP|EGF|HPX|ERBB3|RB1|NKD1|TP53|ERBB2|IGFBP4|RASA1|EGFR|IGFBP1|MTA2|FLT1|WNT3A|APP|RHOC|AKR1B1|PPARG|FZD1|KIT|BRAF|ARAF|FGFR4|BAX|PSME3|WNT1|PRKCI|IFT122|ABCE…	202	431|663|739|809|1237|729|337|505|437|429|1427|1407|585|767|583|851|1445|609|711|831|241|1041|1039|317|1113|509|1395|523|1361|557|251|641|1383|821|933|371|1001|1481|1161|1365|633|1083|577|1493|715|787|867|865|741|335|1035|969|1279|1459|1387|265|361|279|769|459|503|723|1257|819|807|1403|229|675|303|1367|1469|1105|1021|1293|409|1473|983|387|545|453|895|301|579|855|1429|1495|1503|313|581|637|941|1127…	2.8e-20		GO:0009966	1.84737e+16	0
32	23	KEGG Pathways		Fructose and mannose metabolism	4.62e-17	C12orf5|PMM1|ALDOC|PFKFB4|KHK|SORD|PMM2|PFKL|AKR1B1|FUK|HK2|HK3|MPI|PFKM|HKDC1|AKR1B10|PFKFB2|PFKFB1|FBP2|PFKP|HK1|FBP1|PFKFB3	202	1521|1435|1291|587|425|1543|333|1095|769|853|727|567|771|1089|993|733|1319|1335|1255|1535|1219|647|231	3.03e-18		hsa00051	1.83354e+16	0
34	24	Reactome Pathways		RAF activation	6.69e-17	PPP2R5B|PPP2CB|RAF1|KRAS|PPP2R5A|MAP2K2|BRAF|ARAF|MAP2K1|PPP2R1B|PPP2R1A|PPP2R5E|PPP1CC|SHOC2|NRAS|YWHAB|SRC|PPP1CB|KSR1|HRAS|MARK3|PPP2R5C|PPP2R5D|PPP2CA	202	663|729|241|317|1349|821|1257|819|409|1495|1163|1389|881|1325|1451|923|815|1277|1375|277|953|799|1135|379	6.16e-19		HSA-5673000	1.81746e+16	0
57	27	KEGG Pathways		Endometrial cancer	8.05e-17	MAPK1|CCND1|RAF1|KRAS|CDH1|AXIN1|MAP2K2|MAPK3|AKT3|EGF|TP53|ERBB2|EGFR|BRAF|ARAF|BAX|MAP2K1|CTNNA1|GSK3B|CTNNB1|NRAS|AKT2|GRB2|BAD|HRAS|AKT1|MYC	202	809|377|241|317|271|1383|821|933|273|577|865|741|969|1257|819|1403|409|545|1177|989|1451|877|1271|1043|277|1231|391	5.51e-18		hsa05213	1.80942e+16	0
1636	134	GO Biological Process		Negative regulation of response to stimulus	8.59e-17	DVL2|PPP2R5B|PPP1R15A|APOH|CSK|PLAT|PPP2CB|RPS6KB1|VTN|NFKB1|IGFBP2|IGFBP5|ENO1|APOA1|EGR1|PIN1|RAF1|APOE|LGALS3|PDGFRA|MDM2|LRP6|THOC1|CILP|AXIN1|AKT3|CUL3|FGF2|PPP2R3A|RAB7A|AMBP|EGF|ERBB3|RB1|NKD1|TP53|ERBB2|IGFBP4|RASA1|EGFR|IGFBP1|WNT3A|APP|PPARG|FZD1|BAX|PSME3|WNT1|IFT122|VPS35|IGFBP6|IGF1|CTNNA1|IRS1|CXCL8|F2|PLG|PPARD|MAPK7|CLU|DVL3|MET|PPP2R1A|GSK3B|HGS|CALCA|HFE2|PLAUR|DLK1|FOXM1|CTNNB1…	202	431|663|739|239|1237|529|729|337|505|437|1427|1407|767|583|851|609|241|1041|1039|509|523|1361|783|251|1383|273|1481|1161|1365|633|1083|577|715|787|867|865|741|335|1035|969|1279|265|361|459|503|1403|229|675|1367|1021|1293|1473|545|453|301|579|281|855|1429|313|581|637|1163|1177|559|849|369|329|1221|713|989|521|1509|1003|613|397|1487|593|1061|699|827|1369|639|519|1071|561|1099|923|651|815|657|889|11…	7.22e-19		GO:0048585	1.8066e+16	0
3485	219	GO Biological Process		Response to stress	9.72e-17	PPP2R5B|C12orf5|PPP1R15A|APOH|UNC13D|MAPK1|CTSG|MMP2|PLAT|PPP2CB|FKBP14|NFKB1|CCND1|FGFR1OP2|SKP1|APOA1|EGR1|TARDBP|HIST1H4F|C3|PIN1|MBD4|MYOD1|RAF1|APOE|LGALS3|KRAS|EIF2S1|CCNB1|PDGFRA|CDK4|MDM2|DERL1|SLC6A4|PDGFRB|RBL2|MAP2K2|MAPK3|KDR|YWHAE|CUL3|FGF2|DNMT3A|VDAC1|SRF|ERP27|ERBB3|SORD|TP53|ERBB2|IGFBP4|RAB5A|CCNA2|EGFR|IGFBP1|MYL9|VPS26B|WNT3A|APP|RHOC|AKR1B1|PDIA4|PPARG|KIT|BRAF|IGF2BP1|HK2|BA…	202	663|1521|739|239|1461|809|1301|781|529|729|1441|437|377|1125|1195|583|851|1107|1131|1445|609|599|1281|241|1041|1039|317|765|685|509|1395|523|861|843|557|1415|821|933|371|1001|1481|1161|551|967|1223|627|715|1543|865|741|335|1023|979|969|1279|779|1385|265|361|279|769|661|459|723|1257|693|727|1403|229|675|631|515|1469|973|1287|299|409|1473|341|545|1115|301|873|1191|579|571|281|855|1429|1503|257|313|…	8.25e-19		GO:0006950	1.80123e+16	0
72	29	KEGG Pathways		Melanoma	1.1e-17	MAPK1|CCND1|RAF1|KRAS|PDGFRA|CDK4|MDM2|CDH1|PDGFRB|MAP2K2|MAPK3|AKT3|FGF2|EGF|RB1|TP53|EGFR|BRAF|ARAF|BAX|MAP2K1|IGF1|MET|NRAS|AKT2|BAD|FGFR1|HRAS|AKT1	202	809|377|241|317|509|1395|523|271|557|821|933|273|1161|577|787|865|969|1257|819|1403|409|1473|637|1451|877|1043|1123|277|1231	7.89e-18		hsa05218	1.79586e+16	0
1550	129	GO Biological Process		Regulation of apoptotic process	1.53e-16	C12orf5|APOH|RPS6KB1|NFKB1|PPP3R1|ENO1|EGR1|TARDBP|PIN1|STYXL1|YWHAH|RAF1|APOE|LGALS3|KRAS|EIF2S1|SORT1|CDK4|MDM2|LRP6|PDGFRB|FLT4|PAX8|KDR|YWHAE|ERBB3|RB1|TP53|RASA1|EGFR|WNT3A|APP|AKR1B1|PPARG|BRAF|ARAF|BAX|PSME3|WNT1|LRP5|PRKCI|FABP1|ALB|HSPA9|PLK1|IGF1|CTNNA1|YWHAG|CYCS|PPARD|MAPK7|PPP2R1B|CLU|TCP1|CXCR2|F2R|UBE2O|PPP2R1A|GSK3B|PPP1CA|P4HB|LCK|PLAUR|MAPT|SFN|ERBB4|CTNNB1|CTSB|FYN|IGF2R|ANKLE2…	202	1521|239|337|437|585|767|851|1107|609|711|831|241|1041|1039|317|765|1155|1395|523|1361|557|641|1527|371|1001|715|787|865|1035|969|265|361|769|459|1257|819|1403|229|675|445|303|631|515|973|299|1473|545|895|873|855|1429|1495|313|911|909|1127|1531|1163|1177|837|1533|915|329|1297|439|1151|989|985|1509|483|393|397|605|593|1061|699|519|1093|945|563|923|651|815|889|1197|1411|539|1405|1253|415|1215|1229|…	1.31e-18		GO:0042981	1.78153e+16	0
66	28	KEGG Pathways		Acute myeloid leukemia	1.53e-16	MAPK1|RPS6KB1|NFKB1|CCND1|RAF1|CCNA1|KRAS|MAP2K2|MAPK3|AKT3|CCNA2|KIT|BRAF|ARAF|MAP2K1|RPS6KB2|PPARD|EIF4EBP1|MTOR|FCGR1A|NRAS|AKT2|GRB2|BAD|RELA|HRAS|AKT1|MYC	202	809|337|437|377|241|671|317|821|933|273|979|723|1257|819|409|619|855|901|593|407|1451|877|1271|1043|389|277|1231|391	1.14e-17		hsa05221	1.78153e+16	0
999	99	GO Biological Process		Negative regulation of cell death	1.77e-16	C12orf5|APOH|RPS6KB1|NFKB1|ENO1|PIN1|RAF1|APOE|LGALS3|KRAS|MDM2|LRP6|PDGFRB|FLT4|PAX8|KDR|YWHAE|FGF2|ERBB3|RB1|TP53|RASA1|EGFR|WNT3A|APP|AKR1B1|FZD1|KIT|BRAF|ARAF|BAX|PSME3|WNT1|PRKCI|FABP1|ALB|HSPA9|VPS35|PLK1|IGF1|CTNNA1|PPARD|MAPK7|CLU|MET|CXCR2|F2R|UBE2O|GSK3B|PLAUR|SFN|ERBB4|CTNNB1|FYN|ANKLE2|TFRC|MTOR|SNX6|PARK2|NENF|LMNA|IRAK1|SET|HDAC1|SRC|IGBP1|AR|IRS2|PPP1R10|ANXA1|SPRY2|PRKCZ|TEK|AKT2|…	202	1521|239|337|437|767|609|241|1041|1039|317|523|1361|557|641|1527|371|1001|1161|715|787|865|1035|969|265|361|769|503|723|1257|819|1403|229|675|303|631|515|973|1021|299|1473|545|855|1429|313|637|909|1127|1531|1177|329|439|1151|989|1509|393|605|593|1061|699|827|519|945|563|651|815|889|1197|1411|539|1405|1253|415|1215|877|255|1043|1449|1143|1457|749|731|1499|389|305|1157|803|755|887|277|497|701|977|1…	1.53e-18		GO:0060548	1.7752e+16	0
182	41	KEGG Pathways		Viral carcinogenesis	1.81e-16	MAPK1|NFKB1|CCND1|HIST1H4F|C3|YWHAH|CCNA1|KRAS|CDK4|MDM2|RBL2|MAPK3|YWHAE|SRF|RB1|TP53|CCNA2|BAX|YWHAG|PKM|HDAC6|SND1|CHD4|NRAS|CDC20|YWHAB|HDAC1|SRC|RBL1|YWHAQ|GRB2|BAD|CDK1|YWHAZ|DDX3X|RELA|CHEK1|RHOA|HRAS|LYN|HDAC2	202	809|437|377|1131|1445|831|671|317|1395|523|1415|933|1001|1223|787|865|979|1403|895|1471|493|987|1351|1451|625|923|651|815|657|833|1271|1043|1449|1143|1499|389|457|1157|277|1111|421	1.4e-18		hsa05203	1.77423e+16	0
153	38	KEGG Pathways		Hippo signaling pathway	2.25e-16	DVL2|PPP2CB|CCND1|YWHAH|CDH1|AXIN1|YWHAE|NKD1|WNT3A|FZD1|WNT1|PRKCI|CTNNA1|YWHAG|PPP2R1B|DVL3|FZD2|PPP2R1A|GSK3B|PPP2R2A|PPP1CA|PPP2R2C|WNT8B|PPP1CC|CTNNB1|TGFBR2|YWHAB|PRKCZ|DVL1|YWHAQ|PPP2R2B|PPP1CB|YWHAZ|PPP2R2D|PPP2CA|WNT8A|STK3|MYC	202	431|729|377|831|271|1383|1001|867|265|503|675|303|545|895|1495|581|817|1163|1177|879|837|325|245|881|989|1487|923|415|1211|833|859|1277|1143|845|379|1207|1439|391	1.8e-18		hsa04390	1.76478e+16	0
75	29	KEGG Pathways		Chronic myeloid leukemia	2.33e-16	MAPK1|NFKB1|CCND1|RAF1|KRAS|CDK4|MDM2|MAP2K2|MAPK3|AKT3|RB1|TP53|BRAF|ARAF|BAX|MAP2K1|PTPN11|TGFBR2|NRAS|HDAC1|AKT2|GRB2|BAD|RELA|SHC1|HRAS|HDAC2|AKT1|MYC	202	809|437|377|241|317|1395|523|821|933|273|787|865|1257|819|1403|409|1285|1487|1451|651|877|1271|1043|389|803|277|421|1231|391	1.94e-17		hsa05220	1.76326e+16	0
3118	202	GO Biological Process		Organic cyclic compound metabolic process	2.49e-16	CETP|SF3A1|SNRPD3|MAPK1|PMM1|PAPOLA|GNPNAT1|AGO2|TG|FBL|SLC5A5|PON1|GCK|ALDOC|NFKB1|CCND1|APOB|SNX17|ENO1|WDR77|APOA1|TTR|CPSF3|PAPOLG|TARDBP|LIPE|HIST1H4F|GOT2|SYMPK|YWHAH|MBD4|APOE|GFPT2|G6PC|PPP1R1B|FUS|LGALS3|CCNB1|PDGFRA|CDK4|THOC1|MAPK3|SMG6|PAX8|LCAT|CTCF|DNMT3A|AMBP|SRF|HPX|SNRPF|PMM2|TP53|PFKL|GEMIN7|SNRPG|MTA2|GEMIN6|APP|GEMIN5|AKR1B1|PPARG|FUK|HK2|SSU72|FLAD1|HK3|BAX|LRP5|GNPDA2|RAD21|…	202	655|411|773|809|1435|1513|451|1097|1417|1353|835|841|871|1291|437|377|679|573|767|1393|583|1303|1265|891|1107|863|1131|737|1497|831|599|1041|1519|475|751|1199|1039|685|509|1395|783|933|1085|1527|963|957|551|1083|1223|1493|1421|333|865|1095|527|417|1459|1173|361|495|769|459|853|727|395|373|567|1403|445|353|1287|1467|935|233|387|1191|611|1539|855|1273|513|331|471|771|555|941|1205|1471|905|1057|1263…	2.17e-18		GO:1901360	1.76038e+16	0
83	30	KEGG Pathways		ErbB signaling pathway	2.5e-17	MAPK1|RPS6KB1|RAF1|KRAS|MAP2K2|MAPK3|AKT3|EGF|ERBB3|ERBB2|EGFR|BRAF|ARAF|MAP2K1|RPS6KB2|GSK3B|EIF4EBP1|ERBB4|MTOR|NRAS|SRC|AKT2|GRB2|BAD|SHC1|HRAS|PRKCA|NCK1|AKT1|MYC	202	809|337|241|317|821|933|273|577|715|741|969|1257|819|409|619|1177|901|1151|593|1451|815|877|1271|1043|803|277|497|517|1231|391	2.15e-17		hsa04012	1.76021e+16	0
307	53	GO Biological Process		Dephosphorylation	2.7e-17	PPP2R5B|C12orf5|PPP1R15A|PPP2CB|PON1|PFKFB4|PPP3R1|STYXL1|G6PC|PPP2R5A|CILP|PPP2R3A|G6PC3|CTTNBP2NL|PPP4C|SSU72|CYCS|PPP2R1B|PPP2R1A|PPP2R2A|PPP1CA|PPP2R2C|PPP2R5E|LCK|PTPN11|PPP1CC|PPP4R2|PFKFB2|PPP1R15B|PFKFB1|FBP2|G6PC2|PTPRA|PPP2R3B|PPP2R2B|PPP3CB|PPP3CA|PPP1CB|BCL2|PPP4R1|PPP1R12A|PPP2R2D|FBP1|SYNJ1|PPP2R5C|NCK1|PPP2R5D|PPP2CA|PFKFB3|CTDNEP1|PTPDC1|SMEK2|CTDP1	202	663|1521|739|729|841|587|585|711|475|1349|251|1365|1245|1327|775|395|873|1495|1163|879|837|325|1389|915|1285|881|307|1319|1369|1335|1255|897|1479|1475|859|1363|1371|1277|749|1067|1055|845|647|491|799|517|1135|379|231|1209|1447|1489|1063	2.37e-18		GO:0016311	1.75686e+16	0
92	32	Reactome Pathways		Glucose metabolism	3.54e-16	PPP2CB|GCK|ALDOC|PFKFB4|ENO1|GOT2|G6PC|G6PC3|PFKL|HK2|HK3|GNPDA2|PPP2R1B|ADPGK|PKM|ENO3|PPP2R1A|PKLR|PFKM|PFKFB2|PFKFB1|FBP2|G6PC2|PFKP|HK1|GPI|FBP1|PPP2R5D|PPP2CA|GNPDA1|ENO2|PFKFB3	202	729|871|1291|587|767|737|475|1245|1095|727|567|353|1495|1273|1471|1263|1163|1419|1089|1319|1335|1255|897|1535|1219|1541|647|1135|379|595|1109|231	3.43e-18		HSA-70326	1.7451e+16	0
561	71	GO Biological Process		Negative regulation of phosphate metabolic process	5.98e-16	C12orf5|PPP1R15A|CSK|TARDBP|PIN1|STYXL1|APOE|PPP1R1B|LGALS3|CCNB1|PPP1R1A|LRP6|PPP2R5A|IPO5|YWHAE|AMBP|RB1|TP53|BAX|LRP5|PLK1|PPP4R4|YWHAG|MLXIPL|PPP2R1A|GSK3B|PPP1R17|MAPT|SFN|ENSA|FOXM1|OCLN|ANKLE2|MTOR|SNX6|FGFR1OP|PARK2|PPP1R15B|TIPRL|SET|YWHAB|IGBP1|PFKFB1|IRS2|MASTL|PPP1R10|SPRY2|PRKCZ|DVL1|FKBP1B|IGFBP3|SH3BP5|PPME1|FKBP1A|AHSG|RHOA|MYOCD|ARRB2|FBP1|ARRB1|CDKN1C|EIF4G1|NCK1|PPP2R5D|PPP2CA|…	202	1521|739|1237|1107|609|711|1041|751|1039|685|1399|1361|1349|461|1001|1083|787|865|1403|445|299|1491|895|683|1163|1177|717|1297|439|355|713|485|393|593|1061|907|699|1369|811|563|923|889|1335|1411|1295|539|1253|415|1211|643|1229|735|1079|743|939|1157|755|887|647|701|665|1397|517|1135|379|1111|1231|547|295|385|391	5.3e-19		GO:0045936	1722329881601159	0
95	31	KEGG Pathways		Endocrine resistance	6.82e-16	MAPK1|MMP2|RPS6KB1|CCND1|RAF1|KRAS|CDK4|MDM2|MAP2K2|MAPK3|AKT3|RB1|TP53|ERBB2|EGFR|BRAF|ARAF|BAX|MAP2K1|IGF1|RPS6KB2|MTOR|NRAS|SRC|AKT2|GRB2|BAD|BCL2|SHC1|HRAS|AKT1	202	809|781|337|377|241|317|1395|523|821|933|273|787|865|741|969|1257|819|1403|409|1473|619|593|1451|815|877|1271|1043|749|803|277|1231	6.09e-17		hsa01522	1.71662e+16	0
199	43	Reactome Pathways		TCF dependent signaling in response to WNT	6.88e-16	DVL2|PPP2R5B|PPP2CB|LRP6|PPP2R5A|AXIN1|CUL3|WNT3A|FZD1|PSME3|WNT1|LRP5|H2AFZ|H2AFV|PPP2R1B|DVL3|FZD2|PPP2R1A|GSK3B|HIST1H2AJ|HIST2H2AC|PPP2R5E|WNT8B|HIST1H2AD|CTNNB1|FRAT2|FRAT1|HDAC1|HIST1H2AC|DVL1|AKT2|YWHAZ|SMARCA4|PPP2R5C|PPP2R5D|PPP2CA|CSNK1A1|WNT8A|H2AFX|H2AFJ|AKT1|MYC|H2AFB1	202	431|663|729|1361|1349|1383|1481|265|503|229|675|445|349|839|1495|581|817|1163|1177|789|1391|1389|245|931|989|311|321|651|1009|1211|877|1143|635|799|1135|379|745|1207|1145|1027|1231|391|1243	6.96e-18		HSA-201681	1716241156176449	0
72	28	KEGG Pathways		Glioma	7.86e-16	MAPK1|CCND1|RAF1|KRAS|PDGFRA|CDK4|MDM2|PDGFRB|MAP2K2|MAPK3|AKT3|EGF|RB1|TP53|EGFR|BRAF|ARAF|BAX|MAP2K1|IGF1|MTOR|NRAS|AKT2|GRB2|SHC1|HRAS|PRKCA|AKT1	202	809|377|241|317|509|1395|523|557|821|933|273|577|787|865|969|1257|819|1403|409|1473|593|1451|877|1271|803|277|497|1231	7.25e-17		hsa05214	1710457745396059	0
151	37	KEGG Pathways		mTOR signaling pathway	8.39e-16	DVL2|MAPK1|RPS6KB1|RAF1|KRAS|LRP6|MAP2K2|MAPK3|AKT3|WNT3A|FZD1|BRAF|WNT1|LRP5|MAP2K1|IGF1|INSR|IRS1|RPS6KB2|DVL3|FZD2|ULK1|GSK3B|WNT8B|EIF4EBP1|MTOR|NRAS|DVL1|AKT2|GRB2|ULK2|INS|RHOA|HRAS|PRKCA|WNT8A|AKT1	202	431|809|337|241|317|1361|821|933|273|265|503|1257|675|445|409|1473|983|453|619|581|817|1433|1177|245|901|593|1451|1211|877|1271|913|1457|1157|277|497|1207|1231	7.99e-17		hsa04150	170762380391713	0
226	44	KEGG Pathways		Ras signaling pathway	8.46e-16	MAPK1|NFKB1|RAF1|KRAS|PDGFRA|PDGFRB|FLT4|MAP2K2|MAPK3|AKT3|KDR|FGF2|EGF|RAB5A|RASA1|EGFR|FLT1|KIT|FGFR4|MAP2K1|IGF1|INSR|MET|FGFR3|PTPN11|PLA2G4A|SHOC2|NRAS|TEK|AKT2|GRB2|BAD|INS|KSR1|RELA|IGF2|FGFR1|RHOA|SHC1|HRAS|PRKCA|FGFR2|NTRK1|AKT1	202	809|437|241|317|509|557|641|821|933|273|371|1161|577|1023|1035|969|1387|723|807|409|1473|983|637|1323|1285|1017|1325|1451|1215|877|1271|1043|1457|1375|389|401|1123|1157|803|277|497|977|467|1231	8.31e-17		hsa04014	1.70726e+16	0
1712	135	GO Biological Process		Intracellular signal transduction	1.23e-15	DVL2|PPP1R15A|MAPK1|RPS6KB1|NFKB1|SKP1|IGFBP5|PPP3R1|STYXL1|RAF1|APOE|PPP1R1B|KRAS|CCNB1|PDGFRA|PPP1R1A|MDM2|PDGFRB|RBL2|MAP2K2|MAPK3|AKT3|KDR|YWHAE|CUL3|FGF2|RAB7A|EGF|ERBB3|RB1|TP53|ERBB2|RAB5A|CCNA2|RASA1|EGFR|PPP4C|APP|RHOC|AKR1B1|KIT|BRAF|ARAF|FGFR4|BAX|PSME3|WNT1|PRKCI|IFT122|PLK1|MAP2K1|IGF1|HINT1|IRS1|CXCL8|RPS6KB2|MAPK7|CLU|DVL3|MET|SH2D3C|CXCR2|MLXIPL|PPP2R1A|GSK3B|STK25|CUL1|CALCA|FGFR…	202	431|739|809|337|437|1195|1407|585|711|241|1041|751|317|685|509|1399|523|557|1415|821|933|273|371|1001|1481|1161|633|577|715|787|865|741|1023|979|1035|969|775|361|279|769|723|1257|819|807|1403|229|675|303|1367|299|409|1473|387|453|301|619|1429|313|581|637|1247|909|683|1163|1177|1523|925|849|1323|717|901|439|1151|713|1509|423|605|593|811|1325|1451|945|249|923|815|1411|1295|247|415|1211|1053|1215|14…	1.11e-17		GO:0035556	1.69101e+16	0
1776	138	GO Biological Process		Regulation of transport	1.44e-15	CETP|UNC13D|MAPK1|NUTF2|CSK|PON1|GCK|VTN|NFKB1|APOC3|SNX17|PPP3R1|APOA1|TARDBP|C3|YWHAH|SNX4|APOE|LGALS3|MDM2|SLC31A2|DNAJC13|COX17|IPO5|SLC6A4|CDH1|PDGFRB|MAP2K2|MAPK3|PAX8|YWHAE|RAB7A|EGF|ERBB3|TP53|ERBB2|PFKL|CTTNBP2NL|RAB5A|EGFR|WNT3A|APP|PPARG|BRAF|HK2|BAX|LRP5|PRKCI|SLMAP|FABP5|VPS35|MAP2K1|IGF1|INSR|IRS1|YWHAG|COMMD1|F2|PPARD|VAMP2|CLU|F2R|GSK3B|HGS|CALCA|LAMP1|PTPN11|SFN|ENSA|PPP1CC|CTNNB…	202	655|1461|809|629|1237|841|871|505|437|429|573|585|583|1107|1445|831|433|1041|1039|523|1359|667|991|461|843|271|557|821|933|1527|1001|633|577|715|865|741|1095|1327|1023|969|265|361|459|1257|727|1403|445|303|623|1105|1021|409|1473|983|453|895|1191|579|855|501|313|1127|1177|559|849|1355|1285|439|355|881|989|591|521|1509|485|463|695|593|699|1319|639|1071|951|923|815|1031|897|1411|1405|359|447|1011|12…	1.32e-17		GO:0051049	1684163750790475	0
865	89	GO Biological Process		Symbiotic process	2.07e-15	MAPK1|CTSG|SKP1|TARDBP|APOE|PDGFRA|MDM2|DERL1|IPO5|THOC1|CDH1|SRCAP|MAPK3|KDR|YWHAE|RAB7A|AMBP|VDAC1|HPX|IDE|RB1|ASGR1|TP53|RAB5A|CCNA2|EGFR|BAX|PSME3|EIF4A1|ABCE1|VPS35|BUB1|INSR|F2|PLG|BANF1|MET|TCP1|APOL1|EEA1|MMP1|TRIM25|ULK1|PPP1CA|CUL1|LAMP1|LCK|CTNNB1|CTSB|ANXA2|FYN|SND1|ASGR2|IGF2R|VCP|G3BP2|TFRC|EIF3B|PARK2|APOA2|IRAK1|MB21D1|FMR1|SET|YWHAB|HDAC1|SRC|RBL1|DDX58|GRB2|G3BP1|BAD|CDK1|ULK2|C…	202	809|1301|1195|1107|1041|509|523|861|461|783|271|499|933|371|1001|633|1083|967|1493|1485|787|403|865|1023|979|969|1403|229|1037|1469|1021|1511|983|579|281|1423|637|911|331|1315|997|1057|1433|837|925|1355|915|989|985|521|1509|987|441|483|397|423|605|1065|699|639|945|561|951|563|923|651|815|657|1053|1271|1241|1043|1449|913|709|1499|389|635|1157|803|1397|537|1201|1111|1145|959|363|253|1063	1.9e-18		GO:0044403	1.6684e+16	0
923	92	GO Biological Process		Positive regulation of transport	3.2e-16	CETP|UNC13D|MAPK1|NUTF2|PON1|GCK|VTN|PPP3R1|APOA1|TARDBP|C3|YWHAH|SNX4|APOE|LGALS3|MDM2|COX17|IPO5|SLC6A4|CDH1|PDGFRB|YWHAE|RAB7A|EGF|TP53|ERBB2|RAB5A|EGFR|WNT3A|APP|PPARG|BRAF|BAX|PRKCI|VPS35|IGF1|INSR|IRS1|YWHAG|F2|PPARD|VAMP2|CLU|F2R|GSK3B|HGS|LAMP1|PTPN11|SFN|ANXA2|FYN|OCLN|PARK2|PFKFB2|APOA2|FMR1|YWHAB|SRC|FABP3|IRS2|ANXA1|SNX5|GLRX|YWHAQ|AKT2|PDCD10|G6PD|GPC3|BAD|PPP3CB|PPP3CA|CDK1|YWHAZ|IN…	202	655|1461|809|629|841|871|505|585|583|1107|1445|831|433|1041|1039|523|991|461|843|271|557|1001|633|577|865|741|1023|969|265|361|459|1257|1403|303|1021|1473|983|453|895|579|855|501|313|1127|1177|559|1355|1285|439|521|1509|485|699|1319|639|951|923|815|1031|1411|1405|447|961|833|877|255|1045|287|1043|1363|1371|1449|1143|1457|749|1189|1123|939|721|887|1541|277|701|293|1329|435|419|689|1231|547|753|1081	2.96e-17		GO:0051050	1.64949e+16	0
908	91	GO Biological Process		Negative regulation of programmed cell death	3.68e-15	C12orf5|APOH|RPS6KB1|NFKB1|ENO1|PIN1|RAF1|APOE|LGALS3|KRAS|MDM2|LRP6|PDGFRB|FLT4|PAX8|KDR|YWHAE|ERBB3|RB1|TP53|RASA1|EGFR|AKR1B1|KIT|BRAF|ARAF|BAX|PSME3|WNT1|PRKCI|FABP1|ALB|HSPA9|PLK1|IGF1|CTNNA1|PPARD|MAPK7|CLU|MET|CXCR2|F2R|UBE2O|GSK3B|PLAUR|SFN|ERBB4|CTNNB1|FYN|ANKLE2|TFRC|MTOR|SNX6|PARK2|LMNA|IRAK1|SET|HDAC1|SRC|IGBP1|AR|IRS2|PPP1R10|ANXA1|SPRY2|PRKCZ|TEK|AKT2|PDCD10|BAD|CDK1|YWHAZ|INS|BCL2|…	202	1521|239|337|437|767|609|241|1041|1039|317|523|1361|557|641|1527|371|1001|715|787|865|1035|969|769|723|1257|819|1403|229|675|303|631|515|973|299|1473|545|855|1429|313|637|909|1127|1531|1177|329|439|1151|989|1509|393|605|593|1061|699|519|945|563|651|815|889|1197|1411|539|1405|1253|415|1215|877|255|1043|1449|1143|1457|749|731|1499|389|305|1157|803|755|887|277|497|701|977|421|269|467|1231|391	3.43e-17		GO:0043069	1.64342e+16	0
1382	117	GO Biological Process		Negative regulation of cell communication	3.7e-16	DVL2|PPP2R5B|PPP1R15A|CSK|PPP2CB|RPS6KB1|IGFBP2|IGFBP5|ENO1|APOA1|EGR1|PIN1|RAF1|APOE|LGALS3|MDM2|LRP6|SLC6A4|CILP|AXIN1|CUL3|FGF2|PPP2R3A|RAB7A|AMBP|EGF|SRF|ERBB3|RB1|NKD1|TP53|ERBB2|IGFBP4|PFKL|RASA1|EGFR|IGFBP1|APP|PPARG|FZD1|BAX|PSME3|WNT1|IFT122|IGFBP6|IGF1|CTNNA1|IRS1|CXCL8|MAPK7|CLU|DVL3|MET|F2R|PPP2R1A|GSK3B|HGS|CALCA|HFE2|PLAUR|DLK1|PTPN11|FOXM1|CTNNB1|FYN|NKX2-1|STRN3|VCP|TGFBR2|MTOR|SN…	202	431|663|739|1237|729|337|1427|1407|767|583|851|609|241|1041|1039|523|1361|843|251|1383|1481|1161|1365|633|1083|577|1223|715|787|867|865|741|335|1095|1035|969|1279|361|459|503|1403|229|675|1367|1293|1473|545|453|301|1429|313|581|637|1127|1163|1177|559|849|369|329|1221|1285|713|989|1509|1003|613|397|1487|593|1061|699|1369|519|1071|951|923|651|815|889|1197|1253|447|415|1211|643|1229|1271|1241|287|13…	3.48e-17		GO:0010648	1.64318e+16	0
807	85	GO Biological Process		Negative regulation of catalytic activity	3.8e-16	PPP1R15A|CSK|VTN|NFKB1|APOC3|APOA1|C3|STYXL1|RAF1|APOE|PPP1R1B|LGALS3|SORT1|PPP1R1A|MDM2|LRP6|PPP2R5A|IPO5|YWHAE|AMBP|RB1|TP53|APP|PPARG|LRP5|FABP1|ABCE1|PLK1|PPP4R4|YWHAG|MAPK7|LPA|UBE2O|PPP2R1A|GSK3B|SERPINA7|HDAC6|PLAUR|PPP1R17|MAPT|SFN|ENSA|ANXA2|HP|ITIH2|SNX6|FGFR1OP|PARK2|TIPRL|APOA2|SET|SRC|IGBP1|IRS2|MASTL|PPP1R10|ANXA1|SPRY2|PRKCZ|DVL1|FKBP1B|SH3BP5|GPC3|INS|PPME1|DDX3X|FKBP1A|PPP1R12A|A…	202	739|1237|505|437|429|583|1445|711|241|1041|751|1039|1155|1399|523|1361|1349|461|1001|1083|787|865|361|459|445|631|1469|299|1491|895|1429|999|1531|1163|1177|607|493|329|717|1297|439|355|521|875|1139|1061|907|699|811|639|563|815|889|1411|1295|539|1405|1253|415|1211|643|735|287|1457|1079|1499|743|1055|939|755|887|277|701|665|1141|531|517|379|1111|1231|547|295|339|575|385	3.61e-17		GO:0043086	1642021640338319	0
1385	117	GO Biological Process		Negative regulation of signaling	4.26e-15	DVL2|PPP2R5B|PPP1R15A|CSK|PPP2CB|RPS6KB1|IGFBP2|IGFBP5|ENO1|APOA1|EGR1|PIN1|RAF1|APOE|LGALS3|MDM2|LRP6|SLC6A4|CILP|AXIN1|CUL3|FGF2|PPP2R3A|RAB7A|AMBP|EGF|SRF|ERBB3|RB1|NKD1|TP53|ERBB2|IGFBP4|PFKL|RASA1|EGFR|IGFBP1|APP|PPARG|FZD1|BAX|PSME3|WNT1|IFT122|IGFBP6|IGF1|CTNNA1|IRS1|CXCL8|MAPK7|CLU|DVL3|MET|F2R|PPP2R1A|GSK3B|HGS|CALCA|HFE2|PLAUR|DLK1|PTPN11|FOXM1|CTNNB1|FYN|NKX2-1|STRN3|VCP|TGFBR2|MTOR|SN…	202	431|663|739|1237|729|337|1427|1407|767|583|851|609|241|1041|1039|523|1361|843|251|1383|1481|1161|1365|633|1083|577|1223|715|787|867|865|741|335|1095|1035|969|1279|361|459|503|1403|229|675|1367|1293|1473|545|453|301|1429|313|581|637|1127|1163|1177|559|849|369|329|1221|1285|713|989|1509|1003|613|397|1487|593|1061|699|1369|519|1071|951|923|651|815|889|1197|1253|447|415|1211|643|1229|1271|1241|287|13…	4.07e-17		GO:0023057	1.63706e+16	0
2040	149	GO Biological Process		Positive regulation of biosynthetic process	6.96e-15	DVL2|PPP2R5B|PPP1R15A|MAPK1|AGO2|GCK|RPS6KB1|NFKB1|PPP3R1|ENO1|WDR77|APOA1|EGR1|PIN1|YWHAH|MYOD1|FXR2|RAF1|APOE|FUS|CDK4|CCT7|LRP6|THOC1|CDH1|PDGFRB|AXIN1|SRCAP|MAP2K2|MAPK3|PAX8|KDR|CTCF|FGF2|EGF|SRF|RB1|TP53|ERBB2|CCNA2|EGFR|CCT6A|MTA2|CCT5|WNT3A|APP|CCT8|PPARG|FZD1|FGFR4|WNT1|LRP5|CCT3|H2AFZ|VPS35|CCT2|MAP2K1|IGF1|INSR|IRS1|RPS6KB2|F2|HLTF|PPARD|MAPK7|PABPC1|CLU|DVL3|MET|TCP1|MLXIPL|F2R|FZD2|H…	202	431|663|739|809|1097|871|337|437|585|767|1393|583|851|609|831|1281|1249|241|1041|1199|1395|1311|1361|783|271|557|1383|499|821|933|1527|371|957|1161|577|1223|787|865|741|979|969|455|1459|601|265|361|1261|459|503|807|675|445|347|349|1021|1075|409|1473|983|453|619|579|235|855|1429|513|313|581|637|911|683|1127|817|493|369|1129|1151|713|989|1089|1003|1005|613|707|463|275|747|397|593|699|691|951|1099|3…	6.72e-17		GO:0009891	1.61574e+16	0
51	25	GO Biological Process		Hexose catabolic process	7.22e-15	GCK|ALDOC|ENO1|KHK|PFKL|GALM|HK2|HK3|LRP5|GLB1|ADPGK|PKM|ENO3|PKLR|PFKM|PFKFB2|TKTL1|PGM1|PFKP|PGM2|BAD|GLYCTK|HK1|GPI|ENO2	202	871|1291|767|425|1095|1289|727|567|445|1251|1273|1471|1263|1419|1089|1319|1183|757|1535|801|1043|995|1219|1541|1109	7.02e-17		GO:0019320	1.61415e+16	0
1271	110	GO Biological Process		Negative regulation of signal transduction	1.14e-14	DVL2|PPP2R5B|PPP1R15A|CSK|PPP2CB|RPS6KB1|IGFBP2|IGFBP5|ENO1|APOA1|EGR1|PIN1|RAF1|APOE|LGALS3|MDM2|LRP6|CILP|AXIN1|CUL3|FGF2|PPP2R3A|RAB7A|AMBP|EGF|ERBB3|RB1|NKD1|TP53|ERBB2|IGFBP4|RASA1|EGFR|IGFBP1|APP|PPARG|FZD1|BAX|PSME3|WNT1|IFT122|IGFBP6|IGF1|CTNNA1|IRS1|CXCL8|MAPK7|CLU|DVL3|MET|PPP2R1A|GSK3B|HGS|CALCA|HFE2|PLAUR|DLK1|FOXM1|CTNNB1|FYN|NKX2-1|STRN3|VCP|TGFBR2|MTOR|SNX6|PARK2|PPP1R15B|LMNA|HTR1…	202	431|663|739|1237|729|337|1427|1407|767|583|851|609|241|1041|1039|523|1361|251|1383|1481|1161|1365|633|1083|577|715|787|867|865|741|335|1035|969|1279|361|459|503|1403|229|675|1367|1293|1473|545|453|301|1429|313|581|637|1163|1177|559|849|369|329|1221|713|989|1509|1003|613|397|1487|593|1061|699|1369|519|1071|923|651|815|889|1197|1253|447|415|1211|643|1229|1271|1241|287|1457|749|731|709|1499|389|305|…	1.12e-16		GO:0009968	1.59431e+16	0
115	33	GO Biological Process		Carbohydrate catabolic process	1.17e-14	GCK|ALDOC|ENO1|G6PC|KHK|TREH|SORD|PFKL|GALM|HK2|HK3|LRP5|GUSB|GLB1|ADPGK|PKM|ENO3|PKLR|PFKM|HKDC1|PFKFB2|TKTL1|PGM1|PFKFB1|PFKP|PGM2|BAD|GLYCTK|HK1|GPI|DERA|ENO2|LDHA	202	871|1291|767|475|425|1203|1543|1095|1289|727|567|445|1051|1251|1273|1471|1263|1419|1089|993|1319|1183|757|1335|1535|801|1043|995|1219|1541|1517|1109|971	1.15e-16		GO:0016052	1.59318e+16	0
812	84	GO Biological Process		Regulation of protein kinase activity	1.65e-14	DVL2|MAPK1|CSK|CCND1|EGR1|RAF1|APOE|PPP1R1B|CCNA1|KRAS|CCNB1|CDK4|LRP6|PPP2R3C|IPO5|PDGFRB|AXIN1|MAP2K2|MAPK3|FGF2|EGF|ERBB3|RB1|ERBB2|CCNA2|EGFR|FLT1|WNT3A|APP|KIT|BRAF|LRP5|PLK1|IGFBP6|MAP2K1|IGF1|INSR|YWHAG|CLU|DVL3|F2R|PPP2R1A|STK25|HGS|CALCA|PTPN11|SFN|CCNG1|FYN|TGFBR2|MTOR|SNX6|FGFR1OP|FCGR1A|IRAK1|SRC|STK24|SPRY2|PRKCZ|DVL1|SH3BP5|SNX9|PDCD10|MST4|CDK1|INS|KSR1|DDX3X|TF|IGF2|FGFR1|RHOA|SHC…	202	431|809|1237|377|851|241|1041|751|671|317|685|1395|1361|1379|461|557|1383|821|933|1161|577|715|787|741|979|969|1387|265|361|723|1257|445|299|1293|409|1473|983|895|313|581|1127|1163|1523|559|849|1285|439|569|1509|1487|593|1061|907|407|945|815|247|1253|415|1211|735|1373|255|399|1449|1457|1375|1499|1189|401|1123|1157|803|755|277|701|665|517|379|1111|1439|467|1231|1175	1.64e-16		GO:0045859	1.57825e+16	0
68	26	KEGG Pathways		Non-small cell lung cancer	1.79e-14	MAPK1|CCND1|RAF1|KRAS|CDK4|MAP2K2|MAPK3|AKT3|EGF|RB1|TP53|ERBB2|EGFR|BRAF|ARAF|BAX|MAP2K1|MET|NRAS|AKT2|GRB2|BAD|HRAS|PRKCA|RXRA|AKT1	202	809|377|241|317|1395|821|933|273|577|787|865|741|969|1257|819|1403|409|637|1451|877|1271|1043|277|497|537|1231	1.82e-15		hsa05223	1.57471e+16	0
61	26	GO Biological Process		Monosaccharide catabolic process	2.12e-14	GCK|ALDOC|ENO1|KHK|SORD|PFKL|GALM|HK2|HK3|LRP5|GLB1|ADPGK|PKM|ENO3|PKLR|PFKM|PFKFB2|TKTL1|PGM1|PFKP|PGM2|BAD|GLYCTK|HK1|GPI|ENO2	202	871|1291|767|425|1543|1095|1289|727|567|445|1251|1273|1471|1263|1419|1089|1319|1183|757|1535|801|1043|995|1219|1541|1109	2.13e-16		GO:0046365	1.56737e+16	0
2005	146	GO Biological Process		Positive regulation of cellular biosynthetic process	2.16e-14	DVL2|PPP2R5B|PPP1R15A|MAPK1|AGO2|GCK|RPS6KB1|NFKB1|PPP3R1|ENO1|WDR77|APOA1|EGR1|PIN1|YWHAH|MYOD1|FXR2|RAF1|APOE|FUS|CDK4|CCT7|LRP6|THOC1|CDH1|PDGFRB|AXIN1|SRCAP|MAP2K2|MAPK3|PAX8|CTCF|FGF2|EGF|SRF|RB1|TP53|ERBB2|CCNA2|EGFR|CCT6A|MTA2|CCT5|WNT3A|APP|CCT8|PPARG|FZD1|FGFR4|WNT1|LRP5|CCT3|H2AFZ|VPS35|CCT2|MAP2K1|IGF1|INSR|IRS1|RPS6KB2|HLTF|PPARD|MAPK7|PABPC1|CLU|DVL3|MET|TCP1|MLXIPL|F2R|FZD2|HFE2|MKL…	202	431|663|739|809|1097|871|337|437|585|767|1393|583|851|609|831|1281|1249|241|1041|1199|1395|1311|1361|783|271|557|1383|499|821|933|1527|957|1161|577|1223|787|865|741|979|969|455|1459|601|265|361|1261|459|503|807|675|445|347|349|1021|1075|409|1473|983|453|619|235|855|1429|513|313|581|637|911|683|1127|817|369|1129|1151|713|989|1089|1003|1005|613|707|463|275|747|397|593|699|691|951|1099|357|651|815|6…	2.19e-16		GO:0031328	1566554624884907	0
160	36	KEGG Pathways		MicroRNAs in cancer	2.4e-15	MAPK1|NFKB1|CCND1|RAF1|KRAS|PDGFRA|MDM2|PDGFRB|MAP2K2|MAPK3|DNMT3A|ERBB3|TP53|ERBB2|EGFR|WNT3A|IGF2BP1|MAP2K1|IRS1|MAPK7|MET|FGFR3|CCNG1|MTOR|NRAS|HDAC1|IRS2|SPRY2|GRB2|BCL2|RHOA|SHC1|HRAS|PRKCA|HDAC2|MYC	202	809|437|377|241|317|509|523|557|821|933|551|715|865|741|969|265|693|409|453|1429|637|1323|569|593|1451|651|1411|1253|1271|749|1157|803|277|497|421|391	2.5e-16		hsa05206	1.56198e+16	0
4125	238	GO Biological Process		Regulation of cellular biosynthetic process	2.61e-14	DVL2|PPP2R5B|PPP1R15A|MAPK1|AGO2|GCK|RPS6KB1|NFKB1|CCND1|APOC3|IGFBP5|PPP3R1|ENO1|WDR77|APOA1|EGR1|TARDBP|HIST1H4F|C3|PIN1|YWHAH|MYOD1|FXR2|RAF1|APOE|FUS|CCNA1|KRAS|EIF2S1|MBD2|CDK4|CCT7|MDM2|IGF2BP3|LRP6|THOC1|CDH1|PDGFRB|RBL2|AXIN1|SRCAP|MAP2K2|MAPK3|SMG6|PAX8|CTCF|CUL3|FGF2|DNMT3A|EGF|SRF|RB1|TP53|ERBB2|CCNA2|EGFR|CCT6A|MTA2|CCT5|WNT3A|PPP1R3A|APP|GEMIN5|CCT8|PPARG|FZD1|KIT|IGF2BP1|SSU72|FGFR4…	202	431|663|739|809|1097|871|337|437|377|429|1407|585|767|1393|583|851|1107|1131|1445|609|831|1281|1249|241|1041|1199|671|317|765|1113|1395|1311|523|1101|1361|783|271|557|1415|1383|499|821|933|1085|1527|957|1481|1161|551|577|1223|787|865|741|979|969|455|1459|601|265|777|361|495|1261|459|503|723|693|395|807|229|675|1037|445|347|303|349|1103|1105|1287|1021|1075|299|409|1473|983|387|453|1191|839|619|235…	2.66e-16		GO:0031326	1558335949266172	0
4210	241	GO Biological Process		Regulation of biosynthetic process	3.55e-14	DVL2|PPP2R5B|PPP1R15A|MAPK1|AGO2|GCK|RPS6KB1|NFKB1|CCND1|APOC3|APOB|IGFBP5|PPP3R1|ENO1|WDR77|APOA1|EGR1|TARDBP|HIST1H4F|C3|PIN1|YWHAH|MYOD1|FXR2|RAF1|APOE|FUS|CCNA1|KRAS|EIF2S1|MBD2|CDK4|CCT7|MDM2|IGF2BP3|LRP6|THOC1|CDH1|PDGFRB|RBL2|AXIN1|SRCAP|MAP2K2|MAPK3|SMG6|PAX8|KDR|CTCF|CUL3|FGF2|DNMT3A|EGF|SRF|RB1|TP53|ERBB2|CCNA2|EGFR|CCT6A|MTA2|CCT5|WNT3A|PPP1R3A|APP|GEMIN5|CCT8|PPARG|FZD1|KIT|IGF2BP1|SS…	202	431|663|739|809|1097|871|337|437|377|429|679|1407|585|767|1393|583|851|1107|1131|1445|609|831|1281|1249|241|1041|1199|671|317|765|1113|1395|1311|523|1101|1361|783|271|557|1415|1383|499|821|933|1085|1527|371|957|1481|1161|551|577|1223|787|865|741|979|969|455|1459|601|265|777|361|495|1261|459|503|723|693|395|807|229|675|1037|445|347|303|349|1103|1105|1287|1021|1075|299|409|1473|983|387|453|1191|839…	3.65e-16		GO:0009889	1.54498e+16	0
893	88	GO Biological Process		Negative regulation of apoptotic process	3.66e-14	APOH|RPS6KB1|NFKB1|ENO1|PIN1|RAF1|APOE|LGALS3|KRAS|MDM2|LRP6|PDGFRB|FLT4|PAX8|KDR|YWHAE|ERBB3|RB1|TP53|RASA1|EGFR|AKR1B1|BRAF|ARAF|BAX|PSME3|WNT1|PRKCI|FABP1|ALB|HSPA9|PLK1|IGF1|CTNNA1|PPARD|MAPK7|CLU|CXCR2|F2R|UBE2O|GSK3B|PLAUR|SFN|ERBB4|CTNNB1|FYN|ANKLE2|TFRC|MTOR|SNX6|PARK2|LMNA|IRAK1|SET|HDAC1|SRC|IGBP1|AR|IRS2|PPP1R10|ANXA1|SPRY2|PRKCZ|TEK|AKT2|PDCD10|BAD|CDK1|YWHAZ|INS|BCL2|VIMP|DDX3X|RELA|…	202	239|337|437|767|609|241|1041|1039|317|523|1361|557|641|1527|371|1001|715|787|865|1035|969|769|1257|819|1403|229|675|303|631|515|973|299|1473|545|855|1429|313|909|1127|1531|1177|329|439|1151|989|1509|393|605|593|1061|699|519|945|563|651|815|889|1197|1411|539|1405|1253|415|1215|877|255|1043|1449|1143|1457|749|731|1499|389|305|1157|803|755|887|277|497|701|977|421|269|467|1231|391	3.79e-16		GO:0043066	1.54365e+16	0
987	93	GO Biological Process		Response to organonitrogen compound	5.28e-14	MAPK1|MMP2|CSK|SLC5A5|GCK|RPS6KB1|NFKB1|CCND1|IGFBP5|EGR1|GOT2|G6PC|PPP1R1B|SORT1|PDGFRA|CDK4|MDM2|DERL1|KHK|LRP6|IPO5|SLC6A4|CDH1|MAPK3|DNMT3A|IDE|TP53|CCNA2|EGFR|IGFBP1|APP|AKR1B1|PPARG|FUK|WNT1|LRP5|PRKCI|IGF1|INSR|CTNNA1|IRS1|YWHAG|VAMP2|PKM|TRIM25|GSK3B|PPP2R2A|ATP6V0A2|ATP4B|PKLR|EIF4EBP1|CTNNB1|ATP7A|FYN|MAX|VCP|MTOR|SNX6|ACTA1|PARK2|HTR1B|IRS4|RBBP4|SRC|FABP3|PFKFB1|IRS2|ANXA1|PRKCZ|TEK|P…	202	809|781|1237|835|871|337|437|377|1407|851|737|475|751|1155|509|1395|523|861|425|1361|461|843|271|933|551|1485|865|979|969|1279|361|769|459|853|675|445|303|1473|983|545|453|895|501|1471|1057|1177|879|949|1463|1419|901|989|591|1509|747|397|593|1061|603|699|1071|719|267|815|1031|1335|1411|1405|415|1215|1479|877|1271|1043|1371|1449|1437|1457|731|389|401|1157|803|887|243|1111|421|477|1321|971|1231|140…	5.51e-16		GO:0010243	1.52774e+16	0
919	89	GO Biological Process		Positive regulation of cell population proliferation	6.21e-14	MAPK1|MMP2|CCND1|IGFBP2|IGFBP5|WDR77|FAM98A|EGR1|KRAS|CCNB1|PDGFRA|CDK4|MDM2|COX17|PDGFRB|FLT4|MAPK3|AKT3|KDR|CUL3|FGF2|EGF|ERBB3|ERBB2|CCNA2|EGFR|FLT1|WNT3A|AKR1B1|KIT|FGFR4|WNT1|LRP5|PRKCI|IGF1|INSR|IRS1|F2|PPARD|SUZ12|CXCR2|MLXIPL|F2R|FGFR3|PPP1CC|ERBB4|FOXM1|CTNNB1|ATP7A|ANXA2|TGFBR2|TFRC|MTOR|FGFR1OP|S100A6|TIAL1|NRAS|HTR1B|IRAK1|CDC20|HDAC1|AR|IRS2|ANXA1|PRKCZ|TEK|AKT2|PDCD10|BAD|CDK1|INS|B…	202	809|781|377|1427|1407|1393|759|851|317|685|509|1395|523|991|557|641|933|273|371|1481|1161|577|715|741|979|969|1387|265|769|723|807|675|445|303|1473|983|453|579|855|285|909|683|1127|1323|881|1151|713|989|591|521|1487|605|593|907|589|237|1451|1071|945|625|651|1197|1411|1405|415|1215|877|255|1043|1449|1457|749|389|401|1123|803|755|473|277|497|701|977|517|1111|421|477|1231|391|1175	6.52e-16		GO:0008284	1520690839982342	0
1539	122	GO Biological Process		Protein-containing complex subunit organization	6.33e-14	DVL2|CETP|SF3A1|SNRPD3|AGO2|VTN|APOC3|SKP1|APOB|WDR77|APOA1|HIST1H4F|RAF1|APOE|FUS|SCO1|MBD2|CCNB1|MDM2|COX17|LRP6|AXIN1|SRCAP|MAPK3|LCAT|CTCF|CUL3|EGF|TRPV5|SNRPF|TP53|PFKL|GEMIN7|SNRPG|PLA2G7|GEMIN6|WNT3A|APP|GEMIN5|CCT8|FZD1|WNT1|CCT3|ALB|ABCE1|CCT2|SNRPD1|GEMIN2|VAMP2|CLU|DVL3|TCP1|KIAA0196|PRMT5|LPA|GEMIN4|FZD2|PPP2R1A|GSK3B|PPP1CA|CUL1|P4HB|HDAC6|WNT8B|MAPT|SNRPD2|PRMT7|CTNNB1|PFKM|OCLN|APO…	202	431|655|411|773|1097|505|429|1195|679|1393|583|1131|241|1041|1199|869|1113|685|523|991|1361|1383|499|933|963|957|1481|577|1059|1421|865|1095|527|417|1283|1173|265|361|495|1261|503|675|347|515|1469|1075|935|611|501|313|581|911|1181|941|999|905|817|1163|1177|837|925|1533|493|245|1297|1119|1091|989|1089|485|463|747|397|423|1065|699|639|1093|311|321|563|267|651|815|1015|1211|929|1529|1535|1373|1515|1…	6.7e-17		GO:0043933	1.51986e+16	0
1306	110	GO Biological Process		Regulation of organelle organization	6.63e-14	C12orf5|MAPK1|PPP3R1|ENO1|APOA1|PIN1|STYXL1|YWHAH|PPFIA1|CCNB1|PDGFRA|CCT7|PDGFRB|MAP2K2|MAPK3|SMG6|KDR|CTCF|YWHAE|CUL3|RAB7A|EGF|VDAC1|RB1|TP53|RAB5A|RASA1|CCT6A|CCT5|WNT3A|APP|RHOC|WHAMM|CCT8|HK2|BAX|LRP5|CCT3|RAD21|VPS35|CCT2|PLK1|MAP2K1|BUB1|IGF1|INSR|YWHAG|MID1|CLU|MET|TCP1|KIAA0196|PRMT5|ENO3|ULK1|GSK3B|HDAC6|PLAUR|MAPT|SFN|CTNNB1|ANXA2|OCLN|WDR5|G3BP2|TFRC|MTOR|DCTN1|SMG5|PARK2|LMNA|S100A1…	202	1521|809|585|767|583|609|711|831|479|685|509|1311|557|821|933|1085|371|957|1001|1481|633|577|967|787|865|1023|1035|455|601|265|361|279|1347|1261|727|1403|445|347|1287|1021|1075|299|409|1511|1473|983|895|1503|313|637|911|1181|941|1263|1433|1177|493|329|1297|439|989|521|485|275|423|605|593|615|1505|699|519|697|951|625|563|923|815|539|1405|359|1215|833|877|1373|1271|1241|259|1043|899|1143|1457|749|7…	7.07e-16		GO:0033043	1.51785e+16	0
127	32	KEGG Pathways		FoxO signaling pathway	8.84e-14	MAPK1|CCND1|RAF1|G6PC|KRAS|CCNB1|MDM2|RBL2|MAP2K2|MAPK3|AKT3|EGF|G6PC3|EGFR|BRAF|ARAF|PLK1|MAP2K1|IGF1|INSR|IRS1|TGFBR2|NRAS|IRS4|G6PC2|IRS2|AKT2|GRB2|INS|PRMT1|HRAS|AKT1	202	809|377|241|475|317|685|523|1415|821|933|273|577|1245|969|1257|819|299|409|1473|983|453|1487|1451|719|897|1411|877|1271|1457|473|277|1231	9.47e-15		hsa04068	1.50535e+16	0
202	39	KEGG Pathways		Rap1 signaling pathway	9.65e-14	MAPK1|RAF1|KRAS|PDGFRA|CDH1|PDGFRB|FLT4|MAP2K2|MAPK3|AKT3|KDR|FGF2|EGF|EGFR|FLT1|KIT|BRAF|FGFR4|PRKCI|MAP2K1|IGF1|INSR|MET|F2R|FGFR3|CTNNB1|NRAS|SRC|PRKCZ|TEK|AKT2|INS|CTNND1|FGFR1|RHOA|HRAS|PRKCA|FGFR2|AKT1	202	809|241|317|509|271|557|641|821|933|273|371|1161|577|969|1387|723|1257|807|303|409|1473|983|637|1127|1323|989|1451|815|415|1215|877|1457|709|1123|1157|277|497|977|1231	1.06e-14		hsa04015	1.50155e+16	0
429	58	Reactome Pathways		Signaling by Rho GTPases	1.06e-13	DVL2|PPP2R5B|MAPK1|PPP2CB|PIN1|YWHAH|PPP2R5A|CDH1|MAPK3|SGOL1|YWHAE|CUL3|SRF|MYL9|RHOC|H2AFZ|PLK1|BUB1|CTNNA1|YWHAG|H2AFV|PPP2R1B|KLK2|KLK3|DVL3|PPP2R1A|HIST1H2AJ|HGS|HIST2H2AC|PPP2R5E|SFN|HIST1H2AD|PPP1CC|CTNNB1|MKL1|CDC20|YWHAB|SRC|AR|HIST1H2AC|PRKCZ|DVL1|YWHAQ|GRB2|PPP1CB|YWHAZ|MYH11|PPP1R12A|RHOA|PRKCA|PPP2R5C|NCK1|PPP2R5D|PPP2CA|H2AFX|H2AFJ|H2AFB1|MIS12	202	431|663|809|729|609|831|1349|271|933|465|1001|1481|1223|779|279|349|299|1511|545|895|839|1495|1275|257|581|1163|789|559|1391|1389|439|931|881|989|1005|625|923|815|1197|1009|415|1211|833|1271|1277|1143|1267|1055|1157|497|799|517|1135|379|1145|1027|1243|943	1.12e-15		HSA-194315	1.49747e+16	0
355	51	KEGG Pathways		Alzheimer disease	1.09e-13	DVL2|MAPK1|NFKB1|PPP3R1|RAF1|APOE|KRAS|EIF2S1|LRP6|AXIN1|MAP2K2|MAPK3|AKT3|VDAC1|IDE|WNT3A|APP|FZD1|BRAF|ARAF|WNT1|LRP5|MAP2K1|INSR|IRS1|CYCS|DVL3|FZD2|ULK1|GSK3B|ATG101|WNT8B|MAPT|CTNNB1|MTOR|NRAS|FRAT2|FRAT1|IRS4|IRS2|DVL1|AKT2|BAD|PPP3CB|PPP3CA|ULK2|INS|RELA|HRAS|WNT8A|AKT1	202	431|809|437|585|241|1041|317|765|1361|1383|821|933|273|967|1485|265|361|503|1257|819|675|445|409|983|453|873|581|817|1433|1177|1305|245|1297|989|593|1451|311|321|719|1411|1211|877|1043|1363|1371|913|1457|389|277|1207|1231	1.24e-14		hsa05010	1.49626e+16	0
159	35	KEGG Pathways		Hepatitis B	1.09e-13	MAPK1|NFKB1|RAF1|CCNA1|KRAS|MAP2K2|MAPK3|AKT3|RB1|TP53|CCNA2|BRAF|ARAF|BAX|MAP2K1|CXCL8|CYCS|TGFBR2|NRAS|IRAK1|YWHAB|SRC|DDX58|YWHAQ|AKT2|GRB2|BAD|YWHAZ|BCL2|DDX3X|RELA|HRAS|PRKCA|AKT1|MYC	202	809|437|241|671|317|821|933|273|787|865|979|1257|819|1403|409|301|873|1487|1451|945|923|815|1053|833|877|1271|1043|1143|749|1499|389|277|497|1231|391	1.25e-14		hsa05161	1.49626e+16	0
4813	263	GO Biological Process		Regulation of gene expression	1.31e-13	DVL2|PPP2R5B|PPP1R15A|MAPK1|PAPOLA|NUTF2|CSK|AGO2|PPP2CB|RPS6KB1|NFKB1|CCND1|APOB|IGFBP5|PPP3R1|ENO1|WDR77|APOA1|FAM98A|EGR1|TARDBP|HIST1H4F|C3|PIN1|YWHAH|MYOD1|FXR2|RAF1|APOE|G6PC|FUS|CCNA1|KRAS|EIF2S1|MBD2|CCNB1|SORT1|PDGFRA|CDK4|MDM2|IGF2BP3|LRP6|THOC1|SLC6A4|CDH1|CILP|FLT4|RBL2|AXIN1|SRCAP|MAP2K2|MAPK3|SMG6|PAX8|KDR|CTCF|CUL3|FGF2|DNMT3A|EGF|SRF|ERBB3|RB1|TP53|ERBB2|CCNA2|EGFR|MTA2|WNT3A|APP|…	202	431|663|739|809|1513|629|1237|1097|729|337|437|377|679|1407|585|767|1393|583|759|851|1107|1131|1445|609|831|1281|1249|241|1041|475|1199|671|317|765|1113|685|1155|509|1395|523|1101|1361|783|843|271|251|641|1415|1383|499|821|933|1085|1527|371|957|1481|1161|551|577|1223|715|787|865|741|979|969|1459|265|361|495|459|503|723|1257|693|395|807|229|675|1037|445|303|349|1103|1287|1021|299|233|409|1473|983|…	1.41e-15		GO:0010468	1.48827e+16	0
120	31	KEGG Pathways		Cell cycle	1.34e-13	CCND1|SKP1|YWHAH|CCNA1|CCNB1|CDK4|MDM2|RBL2|YWHAE|RB1|TP53|CCNA2|RAD21|PLK1|BUB1|YWHAG|GSK3B|CUL1|SFN|CDC20|YWHAB|HDAC1|RBL1|YWHAQ|CDK1|YWHAZ|CHEK1|CDKN1C|HDAC2|CDC27|MYC	202	377|1195|831|671|685|1395|523|1415|1001|787|865|979|1287|299|1511|895|1177|925|439|625|923|651|657|833|1449|1143|457|665|421|367|391	1.59e-14		hsa04110	1.48729e+16	0
476	61	GO Biological Process		Response to peptide	1.43e-13	MMP2|CSK|GCK|RPS6KB1|NFKB1|IGFBP5|EGR1|GOT2|G6PC|SORT1|CDK4|MDM2|KHK|LRP6|IDE|TP53|CCNA2|IGFBP1|APP|AKR1B1|PPARG|WNT1|LRP5|PRKCI|IGF1|INSR|IRS1|YWHAG|VAMP2|PKM|GSK3B|ATP6V0A2|PKLR|EIF4EBP1|FYN|MAX|MTOR|SNX6|IRS4|RBBP4|SRC|FABP3|PFKFB1|IRS2|ANXA1|PRKCZ|TEK|PTPRA|AKT2|GRB2|INS|VIMP|RELA|IGF2|SHC1|SLC2A1|LYN|TSHR|AKT1|DENND4C|PPP1R9B	202	781|1237|871|337|437|1407|851|737|475|1155|1395|523|425|1361|1485|865|979|1279|361|769|459|675|445|303|1473|983|453|895|501|1471|1177|949|1419|901|1509|747|593|1061|719|267|815|1031|1335|1411|1405|415|1215|1479|877|1271|1457|731|389|401|803|243|1111|477|1231|1409|385	1.55e-15		GO:1901652	1.48447e+16	0
633	71	GO Biological Process		Positive regulation of organelle organization	1.84e-13	MAPK1|PPP3R1|APOA1|YWHAH|CCNB1|CCT7|PDGFRB|MAPK3|KDR|YWHAE|CUL3|EGF|RB1|TP53|CCT6A|CCT5|APP|RHOC|WHAMM|CCT8|HK2|BAX|LRP5|CCT3|RAD21|VPS35|CCT2|IGF1|INSR|YWHAG|MET|TCP1|ULK1|GSK3B|HDAC6|PLAUR|MAPT|SFN|CTNNB1|ANXA2|OCLN|WDR5|G3BP2|MTOR|DCTN1|PARK2|LMNA|S100A10|FMR1|YWHAB|SRC|PPP1R10|ANXA1|TEK|YWHAQ|AKT2|SNX9|GRB2|G3BP1|CCT4|BAD|YWHAZ|INS|BCL2|IGF2|RHOA|HRAS|ARRB1|SYNJ1|NCK1|CDC27	202	809|585|583|831|685|1311|557|933|371|1001|1481|577|787|865|455|601|361|279|1347|1261|727|1403|445|347|1287|1021|1075|1473|983|895|637|911|1433|1177|493|329|1297|439|989|521|485|275|423|593|615|699|519|697|951|923|815|539|1405|1215|833|877|1373|1271|1241|259|1043|1143|1457|749|401|1157|277|701|491|517|367	2.01e-15		GO:0010638	1.47352e+16	0
2882	183	GO Biological Process		Cellular aromatic compound metabolic process	2.03e-13	SF3A1|SNRPD3|MAPK1|PMM1|PAPOLA|GNPNAT1|AGO2|TG|FBL|SLC5A5|PON1|GCK|ALDOC|NFKB1|CCND1|ENO1|WDR77|TTR|CPSF3|PAPOLG|TARDBP|HIST1H4F|GOT2|SYMPK|MBD4|GFPT2|G6PC|PPP1R1B|FUS|LGALS3|CCNB1|CDK4|THOC1|MAPK3|SMG6|PAX8|CTCF|DNMT3A|AMBP|SRF|HPX|SNRPF|PMM2|TP53|PFKL|GEMIN7|SNRPG|MTA2|GEMIN6|APP|GEMIN5|AKR1B1|PPARG|FUK|HK2|SSU72|FLAD1|HK3|BAX|GNPDA2|RAD21|CPSF2|SNRPD1|LSM3|HINT1|COMMD1|GEMIN2|INTS6|PPARD|ADPGK…	202	411|773|809|1435|1513|451|1097|1417|1353|835|841|871|1291|437|377|767|1393|1303|1265|891|1107|1131|737|1497|599|1519|475|751|1199|1039|685|1395|783|933|1085|1527|957|551|1083|1223|1493|1421|333|865|1095|527|417|1459|1173|361|495|769|459|853|727|395|373|567|1403|353|1287|1467|935|233|387|1191|611|1539|855|1273|513|471|771|555|941|1205|1471|905|1057|1263|1163|879|443|541|1545|1419|1297|713|1119|109…	2.23e-15		GO:0006725	1.46925e+16	0
204	40	GO Biological Process		Protein dephosphorylation	2.42e-13	PPP2R5B|PPP1R15A|PPP2CB|PPP3R1|STYXL1|PPP2R5A|PPP2R3A|CTTNBP2NL|PPP4C|SSU72|CYCS|PPP2R1B|PPP2R1A|PPP2R2A|PPP1CA|PPP2R2C|PPP2R5E|LCK|PTPN11|PPP1CC|PPP4R2|PPP1R15B|PTPRA|PPP2R3B|PPP2R2B|PPP3CB|PPP3CA|PPP1CB|BCL2|PPP4R1|PPP1R12A|PPP2R2D|PPP2R5C|NCK1|PPP2R5D|PPP2CA|CTDNEP1|PTPDC1|SMEK2|CTDP1	202	663|739|729|585|711|1349|1365|1327|775|395|873|1495|1163|879|837|325|1389|915|1285|881|307|1369|1479|1475|859|1363|1371|1277|749|1067|1055|845|799|517|1135|379|1209|1447|1489|1063	2.67e-15		GO:0006470	1461618463401957	0
1070	96	GO Biological Process		Response to nitrogen compound	2.65e-13	MAPK1|MMP2|CSK|SLC5A5|GCK|RPS6KB1|NFKB1|CCND1|IGFBP5|EGR1|GOT2|G6PC|PPP1R1B|SORT1|PDGFRA|CDK4|MDM2|DERL1|KHK|LRP6|IPO5|SLC6A4|CDH1|MAPK3|DNMT3A|IDE|TP53|CCNA2|EGFR|IGFBP1|APP|AKR1B1|PPARG|FUK|WNT1|LRP5|PRKCI|IGF1|INSR|CTNNA1|IRS1|YWHAG|VAMP2|PKM|TRIM25|GSK3B|PPP2R2A|ATP6V0A2|ATP4B|PKLR|EIF4EBP1|CTNNB1|ATP7A|FYN|MAX|VCP|MTOR|SNX6|ACTA1|PARK2|HTR1B|MB21D1|FMR1|IRS4|RBBP4|SRC|FABP3|PFKFB1|IRS2|ANXA1…	202	809|781|1237|835|871|337|437|377|1407|851|737|475|751|1155|509|1395|523|861|425|1361|461|843|271|933|551|1485|865|979|969|1279|361|769|459|853|675|445|303|1473|983|545|453|895|501|1471|1057|1177|879|949|1463|1419|901|989|591|1509|747|397|593|1061|603|699|1071|561|951|719|267|815|1031|1335|1411|1405|415|1053|1215|1479|877|1271|1043|1371|1449|1437|1457|731|389|401|1157|803|887|243|1111|421|477|1321…	2.95e-15		GO:1901698	1.45768e+16	0
1676	127	GO Biological Process		Homeostatic process	3.14e-13	CETP|MAPK1|GCK|APOC3|SKP1|APOB|IGFBP5|APOA1|EGR1|ATP7B|HIST1H4F|RAF1|APOE|G6PC|SCO1|KRAS|PDGFRA|SLC31A2|LRP6|PPP2R3C|PDGFRB|SLC30A4|MAPK3|SMG6|KDR|LCAT|YWHAE|FGF2|CP|RAB7A|TRPV5|SRF|HPX|IDE|RB1|FTH1|EGFR|APP|AKR1B1|PDIA4|PPARG|KIT|HK2|FGFR4|HK3|BAX|LRP5|ALB|SLMAP|HSPA9|FABP5|INSR|IRS1|KCNK3|COMMD1|F2|PLG|MET|CXCR2|MLXIPL|F2R|CUL1|P4HB|CALCA|ATP6V0A2|ATP4B|HFE2|LCK|PTPN11|SFN|CTNNB1|ATP7A|PFKM|HKD…	202	655|809|871|429|1195|679|1407|583|851|1309|1131|241|1041|475|869|317|509|1359|1361|1379|557|375|933|1085|371|963|1001|1161|1339|633|1059|1223|1493|1485|787|405|969|361|769|661|459|723|727|807|567|1403|445|515|623|973|1105|983|453|1115|1191|579|281|637|909|683|1127|925|1533|849|949|1463|369|915|1285|439|989|591|1089|993|441|485|463|695|605|615|1505|699|639|1071|365|357|815|1031|297|897|1411|1015|1…	3.51e-15		GO:0042592	1.45031e+16	0
63	25	Reactome Pathways		RHO GTPases activate PKNs	3.39e-13	YWHAH|YWHAE|MYL9|RHOC|H2AFZ|YWHAG|H2AFV|KLK2|KLK3|HIST1H2AJ|HIST2H2AC|SFN|HIST1H2AD|YWHAB|AR|HIST1H2AC|YWHAQ|PPP1CB|YWHAZ|MYH11|PPP1R12A|RHOA|H2AFX|H2AFJ|H2AFB1	202	831|1001|779|279|349|895|839|1275|257|789|1391|439|931|923|1197|1009|833|1277|1143|1267|1055|1157|1145|1027|1243	3.74e-15		HSA-5625740	1.44698e+16	0
2648	172	GO Biological Process		Regulation of developmental process	3.46e-13	DVL2|PPP2R5B|CETP|APOH|UNC13D|MAPK1|AGO2|TG|NFKB1|CCND1|APOB|IGFBP5|WDR77|APOA1|EGR1|HIST1H4F|C3|PIN1|STYXL1|YWHAH|STRIP2|MYOD1|RAF1|APOE|LGALS3|KRAS|CCNB1|SORT1|PDGFRA|CDK4|MDM2|PPP2R3C|THOC1|SLC6A4|PDGFRB|FLT4|PAX8|AKT3|KDR|FGF2|PPP2R3A|EGF|SRF|ERBB3|RB1|NKD1|TP53|ERBB2|RASA1|EGFR|MYL9|FLT1|WNT3A|APP|PPARG|FZD1|KIT|HK2|BAX|PSME3|WNT1|LRP5|PRKCI|IFT122|HSPA9|VPS35|MAP2K1|IGF1|INSR|CTNNA1|YWHAG|C…	202	431|663|655|239|1461|809|1097|1417|437|377|679|1407|1393|583|851|1131|1445|609|711|831|481|1281|241|1041|1039|317|685|1155|509|1395|523|1379|783|843|557|641|1527|273|371|1161|1365|577|1223|715|787|867|865|741|1035|969|779|1387|265|361|459|503|723|727|1403|229|675|445|303|1367|973|1021|409|1473|983|545|895|301|579|855|1429|257|581|285|1181|941|909|1471|817|1163|1177|1523|1533|449|559|849|493|1129|…	3.9e-16		GO:0050793	1.44609e+16	0
5320	281	GO Biological Process		Cell communication	3.59e-13	DVL2|PPP2R5B|PPP1R15A|MAPK1|GZMH|MMP2|CSK|AGO2|TG|PLAT|FKBP14|RPS6KB1|NFKB1|CCND1|APOC3|SKP1|APOB|SNX17|IGFBP2|IGFBP5|PPP3R1|APOA1|TTR|EGR1|C3|STYXL1|YWHAH|MYOD1|RAF1|APOE|PPFIA1|PPP1R1B|LGALS3|KRAS|EIF2S1|CCNB1|SORT1|PDGFRA|CDK4|PPP1R1A|MDM2|DERL1|LRP6|LMNB1|PPP2R5A|THOC1|PDGFRB|FLT4|RBL2|AXIN1|MAP2K2|MAPK3|PAX8|AKT3|STRN|KDR|YWHAE|CUL3|FGF2|PPP2R3A|RAB7A|EGF|VDAC1|SRF|IDE|ERBB3|RB1|NKD1|ASGR1|T…	202	431|663|739|809|1341|781|1237|1097|1417|529|1441|337|437|377|429|1195|679|573|1427|1407|585|583|1303|851|1445|711|831|1281|241|1041|479|751|1039|317|765|685|1155|509|1395|1399|523|861|1361|1259|1349|783|557|641|1415|1383|821|933|1527|273|793|371|1001|1481|1161|1365|633|577|967|1223|1485|715|787|867|403|865|741|335|1023|979|1035|969|1279|775|1387|265|361|279|769|459|503|723|1257|819|807|1403|229|6…	4.07e-15		GO:0007154	1444490555142168	0
105	30	Reactome Pathways		PI3K/AKT Signaling in Cancer	3.88e-13	PDGFRA|MDM2|PDGFRB|AKT3|STRN|FGF2|EGF|ERBB3|ERBB2|EGFR|KIT|FGFR4|IRS1|RPS6KB2|MET|GSK3B|LCK|FGFR3|PTPN11|ERBB4|FYN|MTOR|SRC|IRS2|AKT2|GRB2|BAD|FGFR1|FGFR2|AKT1	202	509|523|557|273|793|1161|577|715|741|969|723|807|453|619|637|1177|915|1323|1285|1151|1509|593|815|1411|877|1271|1043|1123|977|1231	4.83e-15		HSA-2219528	1.44112e+16	0
21	18	Reactome Pathways		CTLA4 inhibitory signaling	3.88e-13	PPP2R5B|PPP2CB|PPP2R5A|AKT3|PPP2R1B|PPP2R1A|PPP2R5E|LCK|PTPN11|FYN|SRC|AKT2|PPP2R5C|PPP2R5D|PPP2CA|LYN|AKT1|YES1	202	663|729|1349|273|1495|1163|1389|915|1285|1509|815|877|799|1135|379|1111|1231|1269	4.49e-15		HSA-389513	1.44112e+16	0
43	22	Reactome Pathways		Negative regulation of MAPK pathway	3.88e-13	PPP2R5B|MAPK1|PPP2CB|RAF1|KRAS|PPP2R5A|MAP2K2|MAPK3|BRAF|ARAF|MAP2K1|PPP2R1B|PPP2R1A|PPP2R5E|NRAS|YWHAB|KSR1|HRAS|MARK3|PPP2R5C|PPP2R5D|PPP2CA	202	663|809|729|241|317|1349|821|933|1257|819|409|1495|1163|1389|1451|923|1375|277|953|799|1135|379	4.46e-15		HSA-5675221	1.44112e+16	0
1805	133	GO Biological Process		Vesicle-mediated transport	3.89e-13	M6PR|APOH|UNC13D|MAPK1|MICALL1|CTSG|SCG3|SNX8|VTN|ALDOC|NFKB1|APOB|SNX17|APOA1|TTR|C3|SNX4|APOE|LGALS3|SORT1|DNAJC13|LRP6|SNX1|MAPK3|CUL3|RAB7A|AMBP|EGF|HPX|ASGR1|PFKL|RAB5A|FTH1|VPS26B|WNT3A|APP|WHAMM|CCT8|KIT|HK3|LRP5|PRKCI|ALB|FABP5|VPS35|CCT2|IGF1|GUSB|INSR|CXCL8|GLB1|COMMD1|F2|PLG|SNX32|VAMP2|CLU|APOL1|EEA1|KIAA0196|CXCR2|PKM|KIF1C|UBE2O|DENND5A|HGS|CALCA|LAMP1|PPFIA3|PLAUR|CTNNB1|CTSB|ANXA2…	202	1343|239|1461|809|813|1301|1169|1025|505|1291|437|679|573|583|1303|1445|433|1041|1039|1155|667|1361|289|933|1481|633|1083|577|1493|403|1095|1023|405|1385|265|361|1347|1261|723|567|445|303|515|1105|1021|1075|1473|1051|983|301|1251|1191|579|281|565|501|313|331|1315|1181|909|1471|263|1531|449|559|849|1355|1029|329|989|985|521|1509|441|875|1525|483|397|1487|605|921|615|1061|699|1233|697|1227|407|1451…	4.45e-15		GO:0016192	1.44101e+16	0
1807	133	GO Biological Process		Regulation of intracellular signal transduction	4.21e-13	DVL2|PPP2R5B|MAPK1|CSK|PPP2CB|APOC3|IGFBP5|ENO1|APOA1|PIN1|STYXL1|RAF1|APOE|KRAS|PDGFRA|MDM2|PDGFRB|FLT4|AXIN1|MAP2K2|MAPK3|KDR|CUL3|FGF2|AMBP|EGF|ERBB3|TP53|ERBB2|IGFBP4|RASA1|EGFR|MTA2|FLT1|APP|RHOC|KIT|BRAF|ARAF|FGFR4|BAX|IGFBP6|MAP2K1|IGF1|INSR|HINT1|IRS1|F2|PPARD|MAPK7|MID1|CLU|DVL3|MET|PRMT5|F2R|TRIM25|PPP2R1A|GSK3B|STK25|P4HB|HGS|LCK|PLAUR|FGFR3|MAPT|PTPN11|ERBB4|FOXM1|CTNNB1|FYN|CHD4|TFRC…	202	431|663|809|1237|729|429|1407|767|583|609|711|241|1041|317|509|523|557|641|1383|821|933|371|1481|1161|1083|577|715|865|741|335|1035|969|1459|1387|361|279|723|1257|819|807|1403|1293|409|1473|983|387|453|579|855|1429|1503|313|581|637|941|1127|1057|1163|1177|1523|1533|559|915|329|1323|1297|1285|1151|713|989|1509|1351|605|593|699|827|1233|1325|945|561|267|651|815|889|1197|1411|1253|415|1215|929|1337|…	4.84e-15		GO:1902531	1.43757e+16	0
72	26	Reactome Pathways		Glycolysis	4.38e-13	PPP2CB|GCK|ALDOC|PFKFB4|ENO1|PFKL|HK2|HK3|GNPDA2|PPP2R1B|ADPGK|PKM|ENO3|PPP2R1A|PKLR|PFKM|PFKFB2|PFKFB1|PFKP|HK1|GPI|PPP2R5D|PPP2CA|GNPDA1|ENO2|PFKFB3	202	729|871|1291|587|767|1095|727|567|353|1495|1273|1471|1263|1163|1419|1089|1319|1335|1535|1219|1541|1135|379|595|1109|231	5.64e-15		HSA-70171	1.43585e+16	0
65	24	KEGG Pathways		Glycolysis / Gluconeogenesis	4.91e-13	GCK|ALDOC|ENO1|G6PC|G6PC3|PFKL|GALM|HK2|HK3|ADPGK|PKM|ENO3|PKLR|PFKM|HKDC1|FBP2|G6PC2|PFKP|PGM2|HK1|GPI|FBP1|ENO2|LDHA	202	871|1291|767|475|1245|1095|1289|727|567|1273|1471|1263|1419|1089|993|1255|897|1535|801|1219|1541|647|1109|971	5.99e-14		hsa00010	1430891850787703	0
73	25	KEGG Pathways		Pancreatic cancer	4.97e-13	MAPK1|RPS6KB1|NFKB1|CCND1|RAF1|KRAS|CDK4|MAPK3|AKT3|EGF|RB1|TP53|ERBB2|EGFR|BRAF|ARAF|BAX|MAP2K1|RPS6KB2|TGFBR2|MTOR|AKT2|BAD|RELA|AKT1	202	809|337|437|377|241|317|1395|933|273|577|787|865|741|969|1257|819|1403|409|619|1487|593|877|1043|389|1231	6.21e-14		hsa05212	1.43036e+16	0
1027	93	GO Biological Process		Regulation of cellular localization	4.98e-13	UNC13D|MAPK1|NUTF2|CSK|PPP3R1|TARDBP|PIN1|YWHAH|SNX4|PPFIA1|LGALS3|CCT7|MDM2|DNAJC13|PPP2R5A|IPO5|CDH1|SLC30A4|MAP2K2|MAPK3|YWHAE|FGF2|EGF|RB1|TP53|ERBB2|RAB5A|EGFR|CCT6A|CCT5|WNT3A|APP|CCT8|BAX|LRP5|CCT3|PRKCI|VPS35|CCT2|PLK1|MAP2K1|YWHAG|COMMD1|F2|VAMP2|DVL3|TCP1|F2R|GSK3B|CALCA|LAMP1|LCK|MAPT|PTPN11|SFN|PPP1CC|ERBB4|CTNNB1|ANXA2|FYN|TFRC|PARK2|LMNA|HTR1B|FMR1|YWHAB|SRC|AR|PRKCZ|DVL1|FKBP1B|YWH…	202	1461|809|629|1237|585|1107|609|831|433|479|1039|1311|523|667|1349|461|271|375|821|933|1001|1161|577|787|865|741|1023|969|455|601|265|361|1261|1403|445|347|303|1021|1075|299|409|895|1191|579|501|581|911|1127|1177|849|1355|915|1297|1285|439|881|1151|989|521|1509|605|699|519|1071|951|923|815|1197|415|1211|643|833|877|255|287|259|1043|1363|1449|1143|1457|749|743|1055|277|701|1329|1111|535|1537|1231|3…	5.78e-15		GO:0060341	1.43028e+16	0
166	36	GO Biological Process		Cellular carbohydrate metabolic process	5.89e-13	GCK|PFKFB4|G6PC|PPP1R1A|KHK|TREH|SORD|PFKL|PPP1R3A|AKR1B1|FUK|BRAF|HK2|HK3|GUSB|GLB1|GSK3B|PPP1CA|PPP1CC|PFKM|HKDC1|PFKFB2|PLA2G4A|PGM1|PFKFB1|FBP2|PFKP|PGM2|AKT2|PPP1CB|HK1|FBP1|SYNJ1|SLC2A1|PFKFB3|AKT1	202	871|587|475|1399|425|1203|1543|1095|777|769|853|1257|727|567|1051|1251|1177|837|881|1089|993|1319|1017|757|1335|1255|1535|801|877|1277|1219|647|491|243|231|1231	6.87e-15		GO:0044262	1.42299e+16	0
602	68	GO Biological Process		Negative regulation of protein modification process	6.22e-13	PPP1R15A|CSK|TARDBP|PIN1|STYXL1|APOE|PPP1R1B|LGALS3|CCNB1|PPP1R1A|LRP6|IPO5|YWHAE|AMBP|RB1|BAX|LRP5|PLK1|PPP4R4|YWHAG|MLXIPL|PPP2R1A|GSK3B|PPP1R17|MAPT|SFN|ENSA|FOXM1|CTNNB1|FYN|OCLN|WDR5|MTOR|SNX6|FGFR1OP|PARK2|PPP1R15B|TIPRL|SET|YWHAB|IGBP1|MASTL|PPP1R10|SPRY2|PRKCZ|DVL1|FKBP1B|IGFBP3|SH3BP5|G6PD|PPME1|FKBP1A|RELA|MYOCD|ARRB2|ARRB1|CDKN1C|EIF4G1|NCK1|PPP2R5D|PPP2CA|LYN|HDAC2|DBI|AKT1|ARPP19|PPP…	202	739|1237|1107|609|711|1041|751|1039|685|1399|1361|461|1001|1083|787|1403|445|299|1491|895|683|1163|1177|717|1297|439|355|713|989|1509|485|275|593|1061|907|699|1369|811|563|923|889|1295|539|1253|415|1211|643|1229|735|1045|1079|743|389|755|887|701|665|1397|517|1135|379|1111|421|419|1231|547|385|391	7.31e-15		GO:0031400	1420620961530918	0
119	30	KEGG Pathways		Thyroid hormone signaling pathway	6.75e-13	MAPK1|CCND1|RAF1|KRAS|MDM2|MAP2K2|MAPK3|AKT3|TP53|PFKL|MAP2K1|GSK3B|CTNNB1|PFKM|MTOR|PFKFB2|NRAS|HDAC1|SRC|PFKP|AKT2|BAD|THRB|HRAS|PRKCA|SLC2A1|RXRA|HDAC2|AKT1|MYC	202	809|377|241|317|523|821|933|273|865|1095|409|1177|989|1089|593|1319|1451|651|815|1535|877|1043|327|277|497|243|537|421|1231|391	8.63e-14		hsa04919	1.41707e+16	0
1163	100	GO Biological Process		Negative regulation of molecular function	6.9e-14	PPP1R15A|CSK|VTN|NFKB1|APOC3|APOA1|C3|SYMPK|PIN1|STYXL1|RAF1|APOE|PPP1R1B|LGALS3|EIF2S1|SORT1|PPP1R1A|MDM2|LRP6|PPP2R5A|IPO5|MAPK3|YWHAE|AMBP|RB1|TP53|CTTNBP2NL|APP|PPARG|BAX|LRP5|FABP1|ABCE1|PLK1|PPP4R4|YWHAG|COMMD1|MAPK7|MET|LPA|UBE2O|PPP2R1A|GSK3B|PPP1CA|SERPINA7|HDAC6|PLAUR|PPP1R17|MAPT|SFN|ENSA|ANXA2|HP|ITIH2|G3BP2|SNX6|FGFR1OP|PARK2|TIPRL|APOA2|IRAK1|FMR1|SET|SRC|IGBP1|IRS2|MASTL|PPP1R10|AN…	202	739|1237|505|437|429|583|1445|1497|609|711|241|1041|751|1039|765|1155|1399|523|1361|1349|461|933|1001|1083|787|865|1327|361|459|1403|445|631|1469|299|1491|895|1191|1429|637|999|1531|1163|1177|837|607|493|329|717|1297|439|355|521|875|1139|423|1061|907|699|811|639|945|951|563|815|889|1411|1295|539|1405|1253|415|1211|643|735|287|1371|1457|1079|1499|743|1055|939|755|887|277|701|665|1141|531|517|1329|…	8.16e-15		GO:0044092	1.41612e+16	0
3227	196	GO Biological Process		Regulation of multicellular organismal process	7.47e-13	DVL2|PPP2R5B|APOH|MAPK1|NUTF2|CSK|AGO2|TG|PLAT|VTN|NFKB1|CCND1|APOC3|IGFBP5|ENO1|WDR77|APOA1|EGR1|HIST1H4F|C3|PIN1|STYXL1|YWHAH|MYOD1|SNX4|APOE|LGALS3|CCNB1|PDGFRA|CDK4|MDM2|IGF2BP3|LRP6|PPP2R3C|THOC1|SLC6A4|PDGFRB|FLT4|MAPK3|PAX8|AKT3|KDR|LCAT|YWHAE|FGF2|PPP2R3A|EGF|SRF|ERBB3|RB1|NKD1|TP53|ERBB2|EGFR|MYL9|FLT1|WNT3A|APP|PPARG|FZD1|KIT|IGF2BP1|HK2|BAX|PSME3|WNT1|LRP5|PRKCI|IFT122|HSPA9|FABP5|VPS3…	202	431|663|239|809|629|1237|1097|1417|529|505|437|377|429|1407|767|1393|583|851|1131|1445|609|711|831|1281|433|1041|1039|685|509|1395|523|1101|1361|1379|783|843|557|641|933|1527|273|371|963|1001|1161|1365|577|1223|715|787|867|865|741|969|779|1387|265|361|459|503|723|693|727|1403|229|675|445|303|1367|973|1105|1021|409|1473|983|545|1115|895|301|579|281|855|1429|257|313|581|637|1181|941|909|1471|1127|1…	8.89e-15		GO:0051239	141266793981846	0
218	39	KEGG Pathways		Human cytomegalovirus infection	7.56e-13	MAPK1|RPS6KB1|NFKB1|CCND1|PPP3R1|RAF1|KRAS|PDGFRA|CDK4|MDM2|MAP2K2|MAPK3|AKT3|RB1|TP53|EGFR|BAX|MAP2K1|CXCL8|CYCS|RPS6KB2|CXCR2|GSK3B|EIF4EBP1|CTNNB1|MTOR|NRAS|MB21D1|SRC|AKT2|GRB2|PPP3CB|PPP3CA|RELA|RHOA|HRAS|PRKCA|AKT1|MYC	202	809|337|437|377|585|241|317|509|1395|523|821|933|273|787|865|969|1403|409|301|873|619|909|1177|901|989|593|1451|561|815|877|1271|1363|1371|389|1157|277|497|1231|391	9.9e-15		hsa05163	1.41215e+16	0
394	54	GO Biological Process		Response to peptide hormone	7.79e-13	CSK|GCK|RPS6KB1|NFKB1|IGFBP5|EGR1|GOT2|G6PC|SORT1|CDK4|MDM2|KHK|LRP6|IDE|CCNA2|IGFBP1|PPARG|WNT1|LRP5|PRKCI|INSR|IRS1|YWHAG|VAMP2|PKM|GSK3B|ATP6V0A2|PKLR|EIF4EBP1|FYN|MAX|MTOR|IRS4|RBBP4|SRC|FABP3|PFKFB1|IRS2|ANXA1|PRKCZ|TEK|PTPRA|AKT2|GRB2|INS|VIMP|RELA|IGF2|SHC1|SLC2A1|LYN|TSHR|AKT1|DENND4C	202	1237|871|337|437|1407|851|737|475|1155|1395|523|425|1361|1485|979|1279|459|675|445|303|983|453|895|501|1471|1177|949|1419|901|1509|747|593|719|267|815|1031|1335|1411|1405|415|1215|1479|877|1271|1457|731|389|401|803|243|1111|477|1231|1409	9.33e-15		GO:0043434	1.41085e+16	0
130	31	KEGG Pathways		Autophagy - animal	7.95e-13	MAPK1|PPP2CB|RPS6KB1|RAF1|KRAS|EIF2S1|MAP2K2|MAPK3|AKT3|RAB7A|MAP2K1|IRS1|RPS6KB2|ULK1|LAMP1|ATG101|CTSB|MTOR|NRAS|IRS4|IGBP1|IRS2|AKT2|BAD|ULK2|INS|BCL2|HRAS|PPP2CA|AKT1|RAB7B	202	809|729|337|241|317|765|821|933|273|633|409|453|619|1433|1355|1305|985|593|1451|719|889|1411|877|1043|913|1457|749|277|379|1231|309	1.07e-13		hsa04140	1409963287134353	0
590	67	GO Biological Process		Cellular response to organonitrogen compound	8.17e-13	MAPK1|MMP2|CSK|SLC5A5|GCK|RPS6KB1|NFKB1|IGFBP5|EGR1|G6PC|PDGFRA|CDK4|MDM2|IPO5|SLC6A4|CDH1|MAPK3|DNMT3A|IDE|TP53|CCNA2|EGFR|IGFBP1|APP|AKR1B1|PPARG|WNT1|PRKCI|IGF1|INSR|CTNNA1|IRS1|YWHAG|VAMP2|PKM|GSK3B|ATP6V0A2|PKLR|EIF4EBP1|CTNNB1|ATP7A|FYN|MAX|MTOR|SNX6|ACTA1|PARK2|HTR1B|IRS4|SRC|IRS2|PRKCZ|PTPRA|AKT2|GRB2|INS|VIMP|RELA|IGF2|SHC1|ARRB2|LYN|HDAC2|TSHR|AKT1|DENND4C|PPP1R9B	202	809|781|1237|835|871|337|437|1407|851|475|509|1395|523|461|843|271|933|551|1485|865|979|969|1279|361|769|459|675|303|1473|983|545|453|895|501|1471|1177|949|1419|901|989|591|1509|747|593|1061|603|699|1071|719|815|1411|415|1479|877|1271|1457|731|389|401|803|887|1111|421|477|1231|1409|385	9.86e-15		GO:0071417	1.40878e+16	0
1041	93	GO Biological Process		Positive regulation of intracellular signal transduction	1.05e-12	DVL2|MAPK1|CSK|IGFBP5|APOA1|STYXL1|RAF1|APOE|KRAS|PDGFRA|PDGFRB|FLT4|AXIN1|MAP2K2|MAPK3|KDR|FGF2|EGF|ERBB3|TP53|ERBB2|IGFBP4|EGFR|FLT1|APP|RHOC|KIT|BRAF|FGFR4|BAX|IGFBP6|MAP2K1|IGF1|INSR|HINT1|IRS1|F2|PPARD|MID1|CLU|DVL3|MET|F2R|TRIM25|STK25|LCK|FGFR3|PTPN11|ERBB4|CTNNB1|FYN|TFRC|MTOR|PARK2|NENF|S100A7|SHOC2|IRAK1|MB21D1|SRC|AR|IRS2|SPRY2|PRKCZ|TEK|IGFBP3|GRB2|PDCD10|BAD|CDK1|INS|BCL2|KSR1|DDX3X|…	202	431|809|1237|1407|583|711|241|1041|317|509|557|641|1383|821|933|371|1161|577|715|865|741|335|969|1387|361|279|723|1257|807|1403|1293|409|1473|983|387|453|579|855|1503|313|581|637|1127|1057|1523|915|1323|1285|1151|989|1509|605|593|699|827|1233|1325|945|561|815|1197|1411|1253|415|1215|1229|1271|255|1043|1449|1457|749|1375|1499|743|389|1189|401|1123|1157|803|887|473|277|497|701|977|517|1111|1439|467…	1.27e-14		GO:1902533	1.39788e+16	0
725	75	GO Biological Process		Regulation of MAPK cascade	1.11e-12	DVL2|MAPK1|CSK|PIN1|RAF1|APOE|KRAS|PDGFRA|PDGFRB|FLT4|AXIN1|MAP2K2|MAPK3|KDR|FGF2|AMBP|EGF|ERBB2|IGFBP4|EGFR|FLT1|APP|KIT|BRAF|FGFR4|IGFBP6|MAP2K1|IGF1|INSR|MID1|DVL3|PRMT5|F2R|PPP2R1A|STK25|HGS|FGFR3|PTPN11|ERBB4|FOXM1|CTNNB1|PARK2|NENF|S100A7|IRAK1|SRC|IGBP1|AR|SPRY2|PRKCZ|TEK|IGFBP3|GRB2|PDCD10|CDK1|YWHAZ|INS|KSR1|TF|IGF2|FGFR1|SHC1|ARRB2|PRMT1|HRAS|PRKCA|ARRB1|FGFR2|PPP2CA|LYN|STK3|NTRK1|AKT1…	202	431|809|1237|609|241|1041|317|509|557|641|1383|821|933|371|1161|1083|577|741|335|969|1387|361|723|1257|807|1293|409|1473|983|1503|581|941|1127|1163|1523|559|1323|1285|1151|713|989|699|827|1233|945|815|889|1197|1253|415|1215|1229|1271|255|1449|1143|1457|1375|1189|401|1123|803|887|473|277|497|701|977|379|1111|1439|467|1231|391|1175	1.35e-14		GO:0043408	1.39547e+16	0
934	87	GO Biological Process		Regulation of protein localization	1.15e-12	MAPK1|NUTF2|CSK|GCK|PPP3R1|TARDBP|PIN1|YWHAH|APOE|PPFIA1|LGALS3|CCT7|MDM2|PPP2R5A|IPO5|CDH1|YWHAE|EGF|RB1|TP53|ERBB2|PFKL|EGFR|CCT6A|CCT5|WNT3A|APP|CCT8|LRP5|CCT3|PRKCI|VPS35|CCT2|PLK1|IGF1|IRS1|YWHAG|COMMD1|F2|PPARD|VAMP2|DVL3|TCP1|F2R|GSK3B|HDAC6|MAPT|PTPN11|SFN|ENSA|ERBB4|CTNNB1|FYN|TFRC|PARK2|PFKFB2|LMNA|YWHAB|SRC|AR|G6PC2|IRS2|PRKCZ|DVL1|FKBP1B|YWHAQ|AKT2|PDCD10|GPC3|CCT4|BAD|PPP3CB|PPP3CA|C…	202	809|629|1237|871|585|1107|609|831|1041|479|1039|1311|523|1349|461|271|1001|577|787|865|741|1095|969|455|601|265|361|1261|445|347|303|1021|1075|299|1473|453|895|1191|579|855|501|581|911|1127|1177|493|1297|1285|439|355|1151|989|1509|605|699|1319|519|923|815|1197|897|1411|415|1211|643|833|877|255|287|259|1043|1363|1371|1449|1143|1457|749|743|1541|277|497|701|243|1329|1111|1231|385	1.42e-14		GO:0032880	1.39393e+16	0
645	70	GO Biological Process		Cellular response to nitrogen compound	1.32e-12	MAPK1|MMP2|CSK|SLC5A5|GCK|RPS6KB1|NFKB1|IGFBP5|EGR1|G6PC|PDGFRA|CDK4|MDM2|IPO5|SLC6A4|CDH1|MAPK3|DNMT3A|IDE|TP53|CCNA2|EGFR|IGFBP1|APP|AKR1B1|PPARG|WNT1|PRKCI|IGF1|INSR|CTNNA1|IRS1|YWHAG|VAMP2|PKM|GSK3B|ATP6V0A2|PKLR|EIF4EBP1|CTNNB1|ATP7A|FYN|MAX|MTOR|SNX6|ACTA1|PARK2|HTR1B|MB21D1|FMR1|IRS4|SRC|IRS2|PRKCZ|DDX58|PTPRA|AKT2|GRB2|INS|VIMP|RELA|IGF2|SHC1|ARRB2|LYN|HDAC2|TSHR|AKT1|DENND4C|PPP1R9B	202	809|781|1237|835|871|337|437|1407|851|475|509|1395|523|461|843|271|933|551|1485|865|979|969|1279|361|769|459|675|303|1473|983|545|453|895|501|1471|1177|949|1419|901|989|591|1509|747|593|1061|603|699|1071|561|951|719|815|1411|415|1053|1479|877|1271|1457|731|389|401|803|887|1111|421|477|1231|1409|385	1.64e-14		GO:1901699	1387942606879415	0
292	46	Reactome Pathways		Metabolism of carbohydrates	1.4e-13	PPP2CB|GCK|ALDOC|PFKFB4|ENO1|GOT2|G6PC|KHK|SORD|G6PC3|PFKL|AKR1B1|HK2|HK3|GNPDA2|GUSB|GLB1|PPP2R1B|ADPGK|PKM|TALDO1|ENO3|PPP2R1A|PKLR|PFKM|PFKFB2|PGM1|PFKFB1|FBP2|G6PC2|PFKP|PGM2|G6PD|GPC3|GLYCTK|TKT|HK1|GPI|FBP1|SLC2A1|DERA|PPP2R5D|PPP2CA|GNPDA1|ENO2|PFKFB3	202	729|871|1291|587|767|737|475|425|1543|1245|1095|769|727|567|353|1051|1251|1495|1273|1471|1483|1263|1163|1419|1089|1319|757|1335|1255|897|1535|801|1045|287|995|1007|1219|1541|647|243|1517|1135|379|595|1109|231	1.87e-14		HSA-71387	1.38539e+16	0
114	29	KEGG Pathways		Neurotrophin signaling pathway	1.57e-12	MAPK1|NFKB1|RAF1|KRAS|SORT1|MAP2K2|MAPK3|AKT3|YWHAE|TP53|BRAF|BAX|MAP2K1|IRS1|MAPK7|GSK3B|PTPN11|NRAS|IRAK1|AKT2|GRB2|BAD|BCL2|RELA|RHOA|SHC1|HRAS|NTRK1|AKT1	202	809|437|241|317|1155|821|933|273|1001|865|1257|1403|409|453|1429|1177|1285|1451|945|877|1271|1043|749|389|1157|803|277|467|1231	2.14e-13		hsa04722	1.38041e+16	0
2359	157	GO Biological Process		Cellular component assembly	1.61e-12	SF3A1|SNRPD3|AGO2|VTN|APOC3|SKP1|APOB|WDR77|APOA1|HIST1H4F|RAF1|APOE|FUS|SCO1|EIF2S1|MBD2|CCNB1|PDGFRA|MDM2|COX17|CDH1|PDGFRB|AXIN1|MAPK3|STRN|CTCF|YWHAE|CUL3|DNMT3A|RAB7A|EGF|TRPV5|SRF|SNRPF|TP53|PFKL|GEMIN7|SNRPG|GEMIN6|WNT3A|APP|RHOC|GEMIN5|WHAMM|CCT8|FZD1|KIT|CCT3|PRKCI|IFT122|HSPA9|VPS35|CCT2|PLK1|SNRPD1|LSM3|CTNNA1|YWHAG|GEMIN2|VAMP2|CLU|TCP1|KIAA0196|PRMT5|GEMIN4|ULK1|PPP2R1A|GSK3B|STK25|C…	202	411|773|1097|505|429|1195|679|1393|583|1131|241|1041|1199|869|765|1113|685|509|523|991|271|557|1383|933|793|957|1001|1481|551|633|577|1059|1223|1421|865|1095|527|417|1173|265|361|279|495|1347|1261|503|723|347|303|1367|973|1021|1075|299|935|233|545|895|611|501|313|911|1181|941|905|1433|1163|1177|1523|925|1533|559|493|1305|1297|1151|1119|1091|989|591|1089|521|485|463|747|397|423|1065|615|603|907|69…	2.01e-14		GO:0022607	1379317412396815	0
568	65	GO Biological Process		Regulation of cellular protein localization	1.66e-12	MAPK1|NUTF2|CSK|PPP3R1|TARDBP|PIN1|YWHAH|PPFIA1|LGALS3|CCT7|MDM2|PPP2R5A|IPO5|CDH1|YWHAE|EGF|RB1|TP53|ERBB2|EGFR|CCT6A|CCT5|WNT3A|APP|CCT8|CCT3|PRKCI|VPS35|CCT2|PLK1|YWHAG|COMMD1|F2|VAMP2|DVL3|TCP1|GSK3B|MAPT|PTPN11|SFN|ERBB4|CTNNB1|FYN|TFRC|PARK2|LMNA|YWHAB|SRC|AR|PRKCZ|DVL1|YWHAQ|AKT2|PDCD10|GPC3|CCT4|BAD|CDK1|YWHAZ|INS|BCL2|HRAS|HFE|AKT1|PPP1R9B	202	809|629|1237|585|1107|609|831|479|1039|1311|523|1349|461|271|1001|577|787|865|741|969|455|601|265|361|1261|347|303|1021|1075|299|895|1191|579|501|581|911|1177|1297|1285|439|1151|989|1509|605|699|519|923|815|1197|415|1211|833|877|255|287|259|1043|1449|1143|1457|749|277|1329|1231|385	2.08e-14		GO:1903827	1.37799e+16	0
231	41	GO Biological Process		Response to insulin	1.81e-12	GCK|RPS6KB1|EGR1|GOT2|G6PC|SORT1|CDK4|KHK|IDE|IGFBP1|PPARG|PRKCI|INSR|IRS1|YWHAG|VAMP2|PKM|GSK3B|ATP6V0A2|PKLR|EIF4EBP1|MAX|MTOR|IRS4|SRC|FABP3|PFKFB1|IRS2|PRKCZ|PTPRA|AKT2|GRB2|INS|VIMP|RELA|IGF2|SHC1|SLC2A1|LYN|AKT1|DENND4C	202	871|337|851|737|475|1155|1395|425|1485|1279|459|303|983|453|895|501|1471|1177|949|1419|901|747|593|719|815|1031|1335|1411|415|1479|877|1271|1457|731|389|401|803|243|1111|1231|1409	2.28e-14		GO:0032868	1.37423e+16	0
1437	113	GO Biological Process		Regulation of response to stress	1.94e-12	DVL2|C12orf5|PPP1R15A|APOH|MAPK1|PLAT|VTN|NFKB1|SKP1|ENO1|APOA1|C3|FXR2|SNX4|RAF1|APOE|FUS|KRAS|PDGFRA|MDM2|THOC1|FLT4|AXIN1|MAP2K2|MAPK3|AKT3|YWHAE|FGF2|AMBP|HPX|RB1|TP53|PLA2G7|EGFR|PPP4C|APP|PPARG|FZD1|BAX|PSME3|WNT1|ABCE1|VPS35|MAP2K1|F2|PLG|PPARD|MAPK7|MID1|CLU|DVL3|MET|F2R|GSK3B|STK25|CUL1|P4HB|LAMP1|HDAC6|PLAUR|MAPT|PTPN11|FOXM1|CTNNB1|ATP7A|ANXA2|FYN|OCLN|PPP4R2|FXR1|MTOR|PARK2|PPP1R15B|P…	202	431|1521|739|239|809|529|505|437|1195|767|583|1445|1249|433|241|1041|1199|317|509|523|783|641|1383|821|933|273|1001|1161|1083|1493|787|865|1283|969|775|361|459|503|1403|229|675|1469|1021|409|579|281|855|1429|1503|313|581|637|1127|1177|1523|925|1533|1355|493|329|1297|1285|713|989|591|521|1509|485|307|707|593|699|1369|1017|519|1451|561|951|1099|815|657|889|539|247|1405|1053|1215|643|283|255|399|104…	2.46e-14		GO:0080134	1.37122e+16	0
449	57	GO Biological Process		Regulation of small molecule metabolic process	2.16e-12	C12orf5|GCK|NFKB1|APOC3|PFKFB4|APOB|ENO1|APOA1|EGR1|APOE|KHK|EGF|TP53|IGFBP4|PPP1R3A|APP|PPARG|KIT|FGFR4|PSME3|FABP1|FABP5|IGF1|INSR|IRS1|PPARD|MLXIPL|GSK3B|PPP1CA|APOA4|WDR5|VCP|MTOR|PARK2|PFKFB2|SRC|FABP3|PFKFB1|IRS2|ANXA1|IGFBP3|AKT2|BAD|PPP1CB|INS|VIMP|LCMT1|IGF2|FBP1|PFKFB3|APOA5|AKT1|ARPP19|APOC1|APOC2|H6PD|SMEK2	202	1521|871|437|429|587|679|767|583|851|1041|425|577|865|335|777|361|459|723|807|229|631|1105|1473|983|453|855|683|1177|837|463|275|397|593|699|1319|815|1031|1335|1411|1405|1229|877|1043|1277|1457|731|797|401|647|231|689|1231|547|295|339|1331|1489	2.76e-14		GO:0062012	1.36655e+16	0
1725	127	GO Biological Process		Cellular response to stress	2.26e-12	PPP2R5B|C12orf5|PPP1R15A|MAPK1|MMP2|PPP2CB|FKBP14|NFKB1|CCND1|SKP1|APOA1|EGR1|TARDBP|HIST1H4F|MBD4|MYOD1|EIF2S1|CCNB1|PDGFRA|MDM2|DERL1|PDGFRB|RBL2|MAP2K2|MAPK3|YWHAE|CUL3|DNMT3A|SRF|ERP27|TP53|CCNA2|EGFR|IGFBP1|AKR1B1|PDIA4|PPARG|BRAF|IGF2BP1|HK2|BAX|PSME3|WNT1|FABP1|ALB|HSPA9|RAD21|PLK1|MAP2K1|CTNNA1|KCNK3|CXCL8|CYCS|COMMD1|PPARD|MAPK7|SH2D3C|RBBP6|TRIM25|ULK1|GSK3B|HNRNPM|STK25|PPP1CA|CUL1|P4H…	202	663|1521|739|809|781|729|1441|437|377|1195|583|851|1107|1131|599|1281|765|685|509|523|861|557|1415|821|933|1001|1481|551|1223|627|865|979|969|1279|769|661|459|1257|693|727|1403|229|675|631|515|973|1287|299|409|545|1115|301|873|1191|855|1429|1247|471|1057|1433|1177|443|1523|837|925|1533|493|901|1297|1285|439|713|591|1377|463|747|397|593|615|699|785|1369|811|519|945|561|951|815|1295|247|1405|929|28…	2.9e-15		GO:0033554	1.36459e+16	0
450	57	GO Biological Process		Negative regulation of hydrolase activity	2.33e-12	PPP1R15A|VTN|APOC3|APOA1|C3|STYXL1|RAF1|PPP1R1B|LGALS3|SORT1|PPP1R1A|MDM2|IPO5|YWHAE|AMBP|TP53|APP|FABP1|ABCE1|PPP4R4|MAPK7|LPA|UBE2O|GSK3B|SERPINA7|PLAUR|PPP1R17|SFN|ENSA|ANXA2|ITIH2|TIPRL|APOA2|SET|SRC|IGBP1|MASTL|PPP1R10|ANXA1|SPRY2|PRKCZ|FKBP1B|GPC3|PPME1|DDX3X|FKBP1A|AHSG|ARRB2|HRAS|ARRB1|SERPINE2|SERPINA1|AKT1|ARPP19|APOC1|ANXA8|PPP1R9B	202	739|505|429|583|1445|711|241|751|1039|1155|1399|523|461|1001|1083|865|361|631|1469|1491|1429|999|1531|1177|607|329|717|439|355|521|1139|811|639|563|815|889|1295|539|1405|1253|415|643|287|1079|1499|743|939|887|277|701|1141|531|1231|547|295|575|385	3.01e-14		GO:0051346	1.36326e+16	0
49	22	Reactome Pathways		RMTs methylate histone arginines	2.75e-12	CCND1|WDR77|CDK4|DNMT3A|H2AFZ|HIST1H2AA|COPRS|H2AFV|PRMT5|HIST1H2AJ|HIST2H2AC|HIST1H2AD|PRMT7|WDR5|HIST1H2AC|RBBP7|PBRM1|SMARCA4|PRMT1|H2AFX|H2AFJ|H2AFB1	202	377|1393|1395|551|349|1103|323|839|941|789|1391|931|1091|275|1009|929|1357|635|473|1145|1027|1243	3.8e-15		HSA-3214858	1.35607e+16	0
30	18	KEGG Pathways		Galactose metabolism	2.86e-12	GCK|G6PC|LCT|SI|G6PC3|PFKL|GALM|AKR1B1|HK2|HK3|GLB1|PFKM|HKDC1|AKR1B10|G6PC2|PFKP|PGM2|HK1	202	871|475|1087|1149|1245|1095|1289|769|727|567|1251|1089|993|733|897|1535|801|1219	4e-14		hsa00052	1.35436e+16	0
395	53	GO Biological Process		Signal transduction by protein phosphorylation	3.13e-12	MAPK1|NFKB1|SKP1|RAF1|KRAS|PDGFRA|PDGFRB|MAP2K2|MAPK3|KDR|YWHAE|CUL3|FGF2|EGF|ERBB3|ERBB2|RASA1|EGFR|KIT|BRAF|ARAF|FGFR4|PSME3|MAP2K1|IGF1|IRS1|MAPK7|MET|SH2D3C|STK25|CUL1|FGFR3|ERBB4|FYN|NRAS|IRAK1|YWHAB|IRS2|STK24|TEK|PTPRA|GRB2|MST4|YWHAZ|KSR1|TF|FGFR1|SHC1|HRAS|FGFR2|MARK3|STK3|MYC	202	809|437|1195|241|317|509|557|821|933|371|1001|1481|1161|577|715|741|1035|969|723|1257|819|807|229|409|1473|453|1429|637|1247|1523|925|1323|1151|1509|1451|945|923|1411|247|1215|1479|1271|399|1143|1375|1189|1123|803|277|977|953|1439|391	4.06e-14		GO:0023014	1.35045e+16	0
410	54	GO Biological Process		Gland development	3.29e-12	MAPK1|GNPNAT1|TG|VTN|CCND1|IGFBP5|WDR77|APOA1|ATP7B|GOT2|RAF1|KRAS|PDGFRA|LRP6|CDH1|PDGFRB|MAPK3|PAX8|CUL3|EGF|SRF|EGFR|WNT3A|HK2|WNT1|LRP5|MAP2K1|INSR|MET|PRMT5|PKM|ERBB4|CTNNB1|ATP7A|NKX2-1|IGF2R|TGFBR2|SRC|AR|FOXE1|IRS2|ANXA1|AKT2|SLC29A1|BCL2|RELA|IGF2|FGFR1|HRAS|FGFR2|SERPINE2|HFE|RXRA|AKT1	202	809|451|1417|505|377|1407|1393|583|1309|737|241|317|509|1361|271|557|933|1527|1481|577|1223|969|265|727|675|445|409|983|637|941|1471|1151|989|591|1003|483|1487|815|1197|1307|1411|1405|877|553|749|389|401|1123|277|977|1141|1329|537|1231	4.31e-14		GO:0048732	1.34828e+16	0
1197	100	Reactome Pathways		Generic Transcription Pathway	3.33e-12	C12orf5|MAPK1|AGO2|PPP2CB|GCK|NFKB1|CCND1|SKP1|PIN1|YWHAH|APOE|G6PC|LGALS3|SCO1|CCNA1|KRAS|CCNB1|CDK4|MDM2|RBL2|AXIN1|MAPK3|AKT3|YWHAE|RB1|TP53|ERBB2|CCNA2|EGFR|IGFBP1|MTA2|MYL9|PPARG|KIT|BAX|PSME3|H2AFZ|YWHAG|CYCS|H2AFV|PPARD|PPP2R1B|SUZ12|MET|PRMT5|PPP2R1A|GSK3B|CUL1|HIST1H2AJ|HIST2H2AC|HDAC6|PTPN11|SFN|HIST1H2AD|CTNNB1|CCNG1|OCLN|CHD4|WDR5|MAX|GATAD2A|MTOR|GATAD2B|IRAK1|YWHAB|RBBP4|HDAC1|SRC|R…	202	1521|809|1097|729|871|437|377|1195|609|831|1041|475|1039|869|671|317|685|1395|523|1415|1383|933|273|1001|787|865|741|979|969|1279|1459|779|459|723|1403|229|349|895|873|839|855|1495|285|637|941|1163|1177|925|789|1391|493|1285|439|931|989|569|485|1351|275|747|617|593|1019|945|923|267|651|815|657|1197|1009|929|1337|1229|833|283|877|1045|1357|1449|1143|327|1457|389|457|635|1541|473|799|379|537|421|11…	4.76e-14		HSA-212436	1347755576649368	0
31	19	GO Biological Process		Glucose catabolic process	3.89e-12	GCK|ALDOC|ENO1|PFKL|HK2|HK3|LRP5|ADPGK|PKM|ENO3|PKLR|PFKM|PFKFB2|TKTL1|PFKP|BAD|HK1|GPI|ENO2	202	871|1291|767|1095|727|567|445|1273|1471|1263|1419|1089|1319|1183|1535|1043|1219|1541|1109	5.11e-14		GO:0006007	1.34101e+16	0
4876	260	GO Biological Process		Signal transduction	4.19e-12	DVL2|PPP2R5B|PPP1R15A|MAPK1|GZMH|MMP2|CSK|AGO2|TG|PLAT|FKBP14|RPS6KB1|NFKB1|CCND1|APOC3|SKP1|APOB|SNX17|IGFBP2|IGFBP5|PPP3R1|APOA1|TTR|EGR1|C3|STYXL1|YWHAH|RAF1|APOE|PPFIA1|PPP1R1B|LGALS3|KRAS|EIF2S1|CCNB1|SORT1|PDGFRA|CDK4|PPP1R1A|MDM2|DERL1|LRP6|LMNB1|PPP2R5A|THOC1|PDGFRB|FLT4|RBL2|AXIN1|MAP2K2|MAPK3|PAX8|AKT3|STRN|KDR|YWHAE|CUL3|FGF2|PPP2R3A|RAB7A|EGF|IDE|ERBB3|RB1|NKD1|TP53|ERBB2|IGFBP4|RAB5A…	202	431|663|739|809|1341|781|1237|1097|1417|529|1441|337|437|377|429|1195|679|573|1427|1407|585|583|1303|851|1445|711|831|241|1041|479|751|1039|317|765|685|1155|509|1395|1399|523|861|1361|1259|1349|783|557|641|1415|1383|821|933|1527|273|793|371|1001|1481|1161|1365|633|577|1485|715|787|867|865|741|335|1023|979|1035|969|1279|775|1387|265|361|279|769|459|503|723|1257|819|807|1403|229|675|445|303|1367|97…	5.54e-14		GO:0007165	1.33778e+16	0
140	31	KEGG Pathways		Signaling pathways regulating pluripotency of stem cells	4.31e-12	DVL2|MAPK1|RAF1|KRAS|AXIN1|MAP2K2|MAPK3|AKT3|FGF2|WNT3A|FZD1|FGFR4|WNT1|MAP2K1|IGF1|DVL3|FZD2|GSK3B|FGFR3|WNT8B|CTNNB1|NRAS|DVL1|AKT2|GRB2|FGFR1|HRAS|FGFR2|WNT8A|AKT1|MYC	202	431|809|241|317|1383|821|933|273|1161|265|503|807|675|409|1473|581|817|1177|1323|245|989|1451|1211|877|1271|1123|277|977|1207|1231|391	6.16e-13		hsa04550	1.33655e+16	0
21	17	GO Biological Process		Beta-catenin destruction complex disassembly	4.91e-12	DVL2|LRP6|AXIN1|WNT3A|FZD1|WNT1|DVL3|FZD2|GSK3B|PPP1CA|WNT8B|CTNNB1|FRAT2|FRAT1|DVL1|CSNK1A1|WNT8A	202	431|1361|1383|265|503|675|581|817|1177|837|245|989|311|321|1211|745|1207	6.53e-14		GO:1904886	1.33089e+16	0
265	43	Reactome Pathways		Signaling by Nuclear Receptors	4.93e-12	CETP|MAPK1|MMP2|AGO2|CCND1|APOE|KRAS|AXIN1|MAPK3|AKT3|STRN|EGF|SRF|EGFR|H2AFZ|FABP5|RAD21|H2AFV|PPARD|HIST1H2AJ|HIST2H2AC|HIST1H2AD|ERBB4|NRAS|HDAC1|SRC|HIST1H2AC|PRKCZ|AKT2|BCL2|SHC1|PRMT1|HRAS|PLTP|RXRA|H2AFX|H2AFJ|AKT1|APOC1|APOC2|APOC4|MYC|H2AFB1	202	655|809|781|1097|377|1041|317|1383|933|273|793|577|1223|969|349|1105|1287|839|855|789|1391|931|1151|1451|651|815|1009|415|877|749|803|473|277|293|537|1145|1027|1231|295|339|649|391|1243	7.26e-14		HSA-9006931	1.33072e+16	0
192	37	GO Biological Process		Protein autophosphorylation	5.18e-12	CSK|EIF2S1|PDGFRA|PDGFRB|FLT4|MAP2K2|MAPK3|KDR|ERBB2|EGFR|FLT1|KIT|FGFR4|INSR|ULK1|GSK3B|STK25|LCK|FGFR3|ERBB4|FYN|MTOR|IRAK1|MKNK1|SRC|STK24|TEK|CHEK2|MST4|ULK2|FGFR1|FGFR2|MARK3|LYN|NTRK1|AKT1|YES1	202	1237|765|509|557|641|821|933|371|741|969|1387|723|807|983|1433|1177|1523|915|1323|1151|1509|593|945|249|815|247|1215|283|399|913|1123|977|953|1111|467|1231|1269	6.94e-14		GO:0046777	1.32857e+16	0
118	30	GO Biological Process		Regulation of glucose metabolic process	5.28e-12	C12orf5|GCK|KHK|TP53|IGFBP4|PPP1R3A|IGF1|INSR|IRS1|GSK3B|PPP1CA|WDR5|MTOR|PARK2|PFKFB2|SRC|PFKFB1|IRS2|IGFBP3|AKT2|BAD|PPP1CB|INS|VIMP|LCMT1|IGF2|FBP1|AKT1|ARPP19|SMEK2	202	1521|871|425|865|335|777|1473|983|453|1177|837|275|593|699|1319|815|1335|1411|1229|877|1043|1277|1457|731|797|401|647|1231|547|1489	7.11e-14		GO:0010906	1.32774e+16	0
521	61	GO Biological Process		Regulation of protein serine/threonine kinase activity	5.3e-13	DVL2|MAPK1|CSK|CCND1|RAF1|APOE|CCNA1|KRAS|CCNB1|CDK4|LRP6|IPO5|PDGFRB|MAP2K2|MAPK3|FGF2|EGF|RB1|ERBB2|CCNA2|EGFR|FLT1|APP|KIT|BRAF|LRP5|PLK1|IGFBP6|MAP2K1|IGF1|INSR|YWHAG|DVL3|F2R|PPP2R1A|HGS|PTPN11|SFN|CCNG1|IRAK1|SRC|SPRY2|PDCD10|CDK1|KSR1|DDX3X|TF|IGF2|FGFR1|RHOA|SHC1|MYOCD|HRAS|ARRB1|CDKN1C|PPP2CA|LYN|STK3|NTRK1|AKT1|CD24	202	431|809|1237|377|241|1041|671|317|685|1395|1361|461|557|821|933|1161|577|787|741|979|969|1387|361|723|1257|445|299|1293|409|1473|983|895|581|1127|1163|559|1285|439|569|945|815|1253|255|1449|1375|1499|1189|401|1123|1157|803|755|277|701|665|379|1111|1439|467|1231|1175	7.18e-14		GO:0071900	1.32757e+16	0
198	36	KEGG Pathways		Focal adhesion	5.69e-12	MAPK1|VTN|CCND1|RAF1|PDGFRA|PDGFRB|FLT4|MAPK3|AKT3|KDR|EGF|ERBB2|EGFR|MYL9|FLT1|BRAF|MAP2K1|IGF1|MET|GSK3B|PPP1CA|PPP1CC|CTNNB1|FYN|SRC|AKT2|GRB2|BAD|PPP1CB|BCL2|PPP1R12A|RHOA|SHC1|HRAS|PRKCA|AKT1	202	809|505|377|241|509|557|641|933|273|371|577|741|969|779|1387|1257|409|1473|637|1177|837|881|989|1509|815|877|1271|1043|1277|749|1055|1157|803|277|497|1231	8.3e-14		hsa04510	1.32449e+16	0
5239	273	GO Biological Process		Signaling	7.5e-13	DVL2|PPP2R5B|PPP1R15A|MAPK1|GZMH|MMP2|CSK|AGO2|TG|PLAT|FKBP14|RPS6KB1|NFKB1|CCND1|APOC3|SKP1|APOB|SNX17|IGFBP2|IGFBP5|PPP3R1|APOA1|TTR|EGR1|C3|STYXL1|YWHAH|RAF1|APOE|PPFIA1|PPP1R1B|LGALS3|KRAS|EIF2S1|CCNB1|SORT1|PDGFRA|CDK4|PPP1R1A|MDM2|DERL1|LRP6|LMNB1|PPP2R5A|THOC1|PDGFRB|FLT4|RBL2|AXIN1|MAP2K2|MAPK3|PAX8|AKT3|STRN|KDR|YWHAE|CUL3|FGF2|PPP2R3A|RAB7A|EGF|VDAC1|IDE|ERBB3|RB1|NKD1|TP53|ERBB2|IGFBP4…	202	431|663|739|809|1341|781|1237|1097|1417|529|1441|337|437|377|429|1195|679|573|1427|1407|585|583|1303|851|1445|711|831|241|1041|479|751|1039|317|765|685|1155|509|1395|1399|523|861|1361|1259|1349|783|557|641|1415|1383|821|933|1527|273|793|371|1001|1481|1161|1365|633|577|967|1485|715|787|867|865|741|335|1023|979|1035|969|1279|775|1387|265|361|279|769|459|503|723|1257|819|807|1403|229|675|445|303|136…	1.02e-13		GO:0023052	131249387366083	0
2473	160	GO Biological Process		Macromolecule localization	7.67e-12	M6PR|DVL2|PPP1R15A|CETP|APOH|MICALL1|PMM1|NUTF2|SCG3|FBL|SNX8|RPS6KB1|APOC3|SKP1|APOB|SNX17|APOA1|CPSF3|GOT2|SYMPK|YWHAH|SNX4|RAF1|APOE|SORT1|MDM2|IGF2BP3|DERL1|DNAJC13|LRP6|IPO5|THOC1|CDH1|SNX1|SMG6|LCAT|CTCF|YWHAE|RAB7A|IDE|RB1|PMM2|TP53|RAB5A|EGFR|VPS26B|WNT3A|PDIA4|PPARG|BRAF|IGF2BP1|HK2|BAX|PRKCI|FABP1|SLMAP|IFT122|ABCE1|HSPA9|FABP5|RAD21|CPSF2|VPS35|CCT2|PLK1|CTNNA1|YWHAG|COMMD1|SNX32|PPARD…	202	1343|431|739|655|239|813|1435|629|1169|1353|1025|337|429|1195|679|573|583|1265|737|1497|831|433|241|1041|1155|523|1101|861|667|1361|461|783|271|289|1085|963|957|1001|633|1485|787|333|865|1023|969|1385|265|661|459|1257|693|727|1403|303|631|623|1367|1469|973|1105|1287|1467|1021|1075|299|545|895|1191|565|855|1503|501|313|911|331|1181|999|1433|559|949|1355|493|1545|989|521|485|525|463|397|1487|423|60…	1.05e-13		GO:0033036	1.31152e+16	0
465	57	GO Biological Process		Positive regulation of catabolic process	8.07e-12	AGO2|PFKFB4|APOA1|TARDBP|APOE|MDM2|SNX1|AXIN1|MAPK3|KDR|CUL3|PPP2R3A|RAB7A|EGF|IDE|RB1|NKD1|APP|HK2|BAX|FABP1|VPS35|PLK1|IGF1|INSR|IRS1|PABPC1|CLU|MLXIPL|ULK1|GSK3B|HDAC6|APOA4|VCP|PARK2|PFKFB2|APOA2|YTHDF1|FMR1|CDC20|PFKFB1|IRS2|DVL1|AKT2|SNX9|GPC3|RNF14|BAD|ULK2|INS|CSNK1A1|CDC27|PFKFB3|APOA5|AKT1|APOC2|UPF1	202	1097|587|583|1107|1041|523|289|1383|933|371|1481|1365|633|577|1485|787|867|361|727|1403|631|1021|299|1473|983|453|513|313|683|1433|1177|493|463|397|699|1319|639|691|951|625|1335|1411|1211|877|1373|287|1013|1043|913|1457|745|367|231|689|1231|339|959	1.11e-13		GO:0009896	1309312646527793	0
152	33	GO Biological Process		Positive regulation of lipid metabolic process	9.64e-12	APOA1|APOE|PDGFRA|PDGFRB|FGF2|FLT1|APP|PPARG|KIT|FABP1|IRS1|F2|PPARD|MLXIPL|FGFR3|ERBB4|APOA4|MTOR|APOA2|SRC|FABP3|IRS2|ANXA1|TEK|AKT2|INS|CNEP1R1|LYN|APOA5|AKT1|CTDNEP1|APOC1|APOC2	202	583|1041|509|557|1161|1387|361|459|723|631|453|579|855|683|1323|1151|463|593|639|815|1031|1411|1405|1215|877|1457|1121|1111|689|1231|1209|295|339	1.33e-13		GO:0045834	1301592296609717	0
1124	95	GO Biological Process		Chemical homeostasis	1.06e-11	CETP|MAPK1|GCK|APOC3|SKP1|APOB|IGFBP5|APOA1|ATP7B|RAF1|APOE|G6PC|SCO1|PDGFRA|SLC31A2|LRP6|PPP2R3C|SLC30A4|MAPK3|KDR|LCAT|YWHAE|FGF2|CP|RAB7A|TRPV5|SRF|HPX|FTH1|EGFR|APP|AKR1B1|PPARG|HK2|FGFR4|HK3|BAX|LRP5|SLMAP|FABP5|INSR|IRS1|KCNK3|COMMD1|F2|MET|CXCR2|MLXIPL|F2R|CUL1|CALCA|ATP6V0A2|ATP4B|HFE2|LCK|PTPN11|SFN|ATP7A|HKDC1|ASGR2|APOA4|TRPV6|TFRC|PARK2|APOA2|HTR1B|ANXA7|SRC|FABP3|SLC31A1|G6PC2|IRS2|A…	202	655|809|871|429|1195|679|1407|583|1309|241|1041|475|869|509|1359|1361|1379|375|933|371|963|1001|1161|1339|633|1059|1223|1493|405|969|361|769|459|727|807|567|1403|445|623|1105|983|453|1115|1191|579|637|909|683|1127|925|849|949|1463|369|915|1285|439|591|993|441|463|695|605|699|639|1071|365|815|1031|297|897|1411|1015|643|553|1043|1371|1507|1457|749|1499|1189|469|1219|1171|1329|435|269|689|1231|339|6…	1.48e-13		GO:0048878	1297469413473523	0
40	20	GO Biological Process		Glycolytic process	1.21e-11	GCK|ALDOC|ENO1|PFKL|HK2|HK3|ADPGK|PKM|ENO3|PKLR|PFKM|HKDC1|PFKFB2|PGM1|PFKFB1|PFKP|HK1|GPI|ENO2|LDHA	202	871|1291|767|1095|727|567|1273|1471|1263|1419|1089|993|1319|757|1335|1535|1219|1541|1109|971	1.69e-13		GO:0006096	1.29172e+16	0
518	60	GO Biological Process		Transmembrane receptor protein tyrosine kinase signaling pathway	1.39e-11	MAPK1|MMP2|PLAT|RAF1|SORT1|PDGFRA|PDGFRB|FLT4|MAPK3|KDR|FGF2|EGF|IDE|ERBB3|ERBB2|RASA1|EGFR|IGFBP1|FLT1|KIT|BRAF|FGFR4|IGF1|INSR|IRS1|MET|GSK3B|HNRNPM|ATP6V0A2|LCK|FGFR3|EIF4EBP1|PTPN11|ERBB4|FYN|IGF2R|TIAL1|SHOC2|IRS4|SRC|IRS2|TEK|PTPRA|AKT2|GRB2|INS|IGF2|FGFR1|RHOA|SHC1|TIA1|HRAS|PRKCA|FGFR2|NCK1|LYN|NTRK1|AKT1|YES1|CPNE3	202	809|781|529|241|1155|509|557|641|933|371|1161|577|1485|715|741|1035|969|1279|1387|723|1257|807|1473|983|453|637|1177|443|949|915|1323|901|1285|1151|1509|483|237|1325|719|815|1411|1215|1479|877|1271|1457|401|1123|1157|803|1235|277|497|977|517|1111|467|1231|1269|847	1.96e-13		GO:0007169	1.2857e+16	0
342	48	GO Biological Process		Positive regulation of cellular protein localization	1.6e-12	MAPK1|NUTF2|PPP3R1|TARDBP|YWHAH|LGALS3|CCT7|MDM2|IPO5|CDH1|YWHAE|EGF|TP53|ERBB2|EGFR|CCT6A|CCT5|WNT3A|CCT8|CCT3|PRKCI|CCT2|PLK1|YWHAG|F2|VAMP2|TCP1|GSK3B|MAPT|SFN|ERBB4|FYN|TFRC|PARK2|YWHAB|SRC|YWHAQ|AKT2|PDCD10|CCT4|BAD|CDK1|YWHAZ|INS|BCL2|HRAS|AKT1|PPP1R9B	202	809|629|585|1107|831|1039|1311|523|461|271|1001|577|865|741|969|455|601|265|1261|347|303|1075|299|895|579|501|911|1177|1297|439|1151|1509|605|699|923|815|833|877|255|259|1043|1449|1143|1457|749|277|1231|385	2.26e-13		GO:1903829	1.27959e+16	0
1906	133	GO Biological Process		Positive regulation of macromolecule biosynthetic process	1.83e-11	DVL2|PPP2R5B|PPP1R15A|MAPK1|AGO2|GCK|RPS6KB1|NFKB1|PPP3R1|WDR77|EGR1|PIN1|YWHAH|MYOD1|FXR2|RAF1|APOE|FUS|CDK4|CCT7|LRP6|THOC1|CDH1|PDGFRB|AXIN1|SRCAP|MAP2K2|MAPK3|PAX8|KDR|CTCF|FGF2|EGF|SRF|RB1|TP53|ERBB2|CCNA2|EGFR|CCT6A|MTA2|CCT5|WNT3A|APP|CCT8|PPARG|FZD1|FGFR4|WNT1|LRP5|CCT3|H2AFZ|CCT2|MAP2K1|IGF1|INSR|IRS1|RPS6KB2|HLTF|PPARD|MAPK7|PABPC1|DVL3|MET|TCP1|MLXIPL|F2R|FZD2|HDAC6|HFE2|MKL2|ERBB4|FOX…	202	431|663|739|809|1097|871|337|437|585|1393|851|609|831|1281|1249|241|1041|1199|1395|1311|1361|783|271|557|1383|499|821|933|1527|371|957|1161|577|1223|787|865|741|979|969|455|1459|601|265|361|1261|459|503|807|675|445|347|349|1075|409|1473|983|453|619|235|855|1429|513|581|637|911|683|1127|817|493|369|1129|1151|713|989|1089|1003|1005|613|707|747|593|699|691|951|1099|357|651|815|657|1197|1307|1411|447…	2.62e-13		GO:0010557	1273754891026957	0
128	29	KEGG Pathways		Dopaminergic synapse	1.88e-11	PPP2R5B|PPP2CB|PPP1R1B|PPP2R5A|PPP2R3C|AKT3|PPP2R3A|PPP2R1B|PPP2R1A|GSK3B|PPP2R2A|PPP1CA|PPP2R2C|PPP2R5E|PPP1CC|PPP2R3B|AKT2|PPP2R2B|PPP3CB|PPP3CA|PPP1CB|PPP2R2D|ARRB2|PRKCA|ARRB1|PPP2R5C|PPP2R5D|PPP2CA|AKT1	202	663|729|751|1349|1379|273|1365|1495|1163|1177|879|837|325|1389|881|1475|877|859|1363|1371|1277|845|887|497|701|799|1135|379|1231	2.8e-13		hsa04728	1272584215073632	0
3878	218	GO Biological Process		Regulation of cellular macromolecule biosynthetic process	2.03e-11	DVL2|PPP2R5B|PPP1R15A|MAPK1|AGO2|GCK|RPS6KB1|NFKB1|CCND1|IGFBP5|PPP3R1|ENO1|WDR77|EGR1|TARDBP|HIST1H4F|PIN1|YWHAH|MYOD1|FXR2|RAF1|APOE|FUS|CCNA1|KRAS|EIF2S1|MBD2|CDK4|CCT7|MDM2|IGF2BP3|LRP6|THOC1|CDH1|PDGFRB|RBL2|AXIN1|SRCAP|MAP2K2|MAPK3|SMG6|PAX8|CTCF|CUL3|FGF2|DNMT3A|EGF|SRF|RB1|TP53|ERBB2|CCNA2|EGFR|CCT6A|MTA2|CCT5|WNT3A|PPP1R3A|APP|GEMIN5|CCT8|PPARG|FZD1|KIT|IGF2BP1|SSU72|FGFR4|PSME3|WNT1|EIF…	202	431|663|739|809|1097|871|337|437|377|1407|585|767|1393|851|1107|1131|609|831|1281|1249|241|1041|1199|671|317|765|1113|1395|1311|523|1101|1361|783|271|557|1415|1383|499|821|933|1085|1527|957|1481|1161|551|577|1223|787|865|741|979|969|455|1459|601|265|777|361|495|1261|459|503|723|693|395|807|229|675|1037|445|347|303|349|1103|1287|1075|299|409|1473|983|387|453|1191|839|619|235|855|1429|513|313|581|2…	2.92e-13		GO:2000112	1.26925e+16	0
524	60	GO Biological Process		Response to growth factor	2.17e-11	PPP2R5B|MAPK1|MICALL1|RPS6KB1|EGR1|RAF1|SORT1|PDGFRA|MDM2|PDGFRB|CILP|FLT4|MAPK3|KDR|FGF2|TP53|ERBB2|CCNA2|EGFR|FLT1|APP|FGFR4|INSR|CXCL8|MAPK7|HNRNPM|CALCA|HDAC6|HFE2|FGFR3|MAPT|PTPN11|ERBB4|CTNNB1|ATP7A|FYN|TGFBR2|TIAL1|SHOC2|SRC|ANXA1|SPRY2|PRKCZ|GRB2|RELA|FGFR1|RHOA|SHC1|TIA1|ARRB2|FGFR2|HFE|HDAC2|NTRK1|AKT1|YES1|CPNE3|PPP1R9B|EHD1|MYC	202	663|809|813|337|851|241|1155|509|523|557|251|641|933|371|1161|865|741|979|969|1387|361|807|983|301|1429|443|849|493|369|1323|1297|1285|1151|989|591|1509|1487|237|1325|815|1405|1253|415|1271|389|1123|1157|803|1235|887|977|1329|421|467|1231|1269|847|385|1081|391	3.14e-13		GO:0070848	1266354026615147	0
494	58	GO Biological Process		Cellular response to growth factor stimulus	2.38e-11	PPP2R5B|MAPK1|MICALL1|RPS6KB1|EGR1|RAF1|SORT1|PDGFRA|MDM2|PDGFRB|CILP|FLT4|MAPK3|KDR|FGF2|TP53|ERBB2|CCNA2|EGFR|FLT1|APP|FGFR4|INSR|CXCL8|MAPK7|HNRNPM|CALCA|HFE2|FGFR3|MAPT|PTPN11|ERBB4|CTNNB1|ATP7A|FYN|TGFBR2|TIAL1|SHOC2|SRC|ANXA1|SPRY2|PRKCZ|GRB2|RELA|FGFR1|RHOA|SHC1|TIA1|ARRB2|FGFR2|HFE|HDAC2|NTRK1|AKT1|YES1|CPNE3|PPP1R9B|EHD1	202	663|809|813|337|851|241|1155|509|523|557|251|641|933|371|1161|865|741|979|969|1387|361|807|983|301|1429|443|849|369|1323|1297|1285|1151|989|591|1509|1487|237|1325|815|1405|1253|415|1271|389|1123|1157|803|1235|887|977|1329|421|467|1231|1269|847|385|1081	3.46e-13		GO:0071363	1.26234e+16	0
49	21	GO Biological Process		ADP metabolic process	2.55e-11	GCK|ALDOC|ENO1|PFKL|HK2|HK3|ADPGK|PKM|ENO3|PKLR|PFKM|HKDC1|PFKFB2|PGM1|PFKFB1|PFKP|BAD|HK1|GPI|ENO2|LDHA	202	871|1291|767|1095|727|567|1273|1471|1263|1419|1089|993|1319|757|1335|1535|1043|1219|1541|1109|971	3.74e-13		GO:0046031	1.25935e+16	0
543	61	GO Biological Process		Positive regulation of MAPK cascade	2.73e-11	DVL2|MAPK1|CSK|RAF1|APOE|KRAS|PDGFRA|PDGFRB|FLT4|AXIN1|MAP2K2|MAPK3|KDR|FGF2|EGF|ERBB2|IGFBP4|EGFR|FLT1|APP|KIT|BRAF|FGFR4|IGFBP6|MAP2K1|IGF1|INSR|MID1|DVL3|F2R|STK25|FGFR3|PTPN11|ERBB4|CTNNB1|NENF|S100A7|IRAK1|SRC|AR|SPRY2|PRKCZ|TEK|IGFBP3|PDCD10|CDK1|INS|KSR1|TF|IGF2|FGFR1|SHC1|ARRB2|PRMT1|HRAS|PRKCA|ARRB1|FGFR2|STK3|NTRK1|CD24	202	431|809|1237|241|1041|317|509|557|641|1383|821|933|371|1161|577|741|335|969|1387|361|723|1257|807|1293|409|1473|983|1503|581|1127|1523|1323|1285|1151|989|827|1233|945|815|1197|1253|415|1215|1229|255|1449|1457|1375|1189|401|1123|803|887|473|277|497|701|977|1439|467|1175	4.01e-13		GO:0043410	1.25638e+16	0
36	18	KEGG Pathways		Thyroid cancer	2.91e-11	MAPK1|CCND1|KRAS|CDH1|MAP2K2|MAPK3|PAX8|TP53|PPARG|BRAF|BAX|MAP2K1|CTNNB1|NRAS|HRAS|RXRA|NTRK1|MYC	202	809|377|317|271|821|933|1527|865|459|1257|1403|409|989|1451|277|537|467|391	4.42e-12		hsa05216	1.25361e+16	0
2337	152	GO Biological Process		Positive regulation of gene expression	3.13e-11	DVL2|PPP2R5B|PPP1R15A|MAPK1|AGO2|RPS6KB1|NFKB1|APOB|PPP3R1|ENO1|FAM98A|EGR1|TARDBP|C3|PIN1|YWHAH|MYOD1|FXR2|RAF1|APOE|FUS|KRAS|CCNB1|CDK4|MDM2|LRP6|THOC1|SLC6A4|CDH1|FLT4|AXIN1|MAP2K2|MAPK3|PAX8|CTCF|FGF2|EGF|SRF|ERBB3|RB1|TP53|ERBB2|CCNA2|EGFR|MTA2|WNT3A|APP|PPARG|FZD1|KIT|BRAF|IGF2BP1|FGFR4|WNT1|LRP5|H2AFZ|VPS35|MAP2K1|IGF1|INSR|RPS6KB2|HLTF|PPARD|MAPK7|PABPC1|CLU|DVL3|MET|MLXIPL|F2R|FZD2|GSK3B…	202	431|663|739|809|1097|337|437|679|585|767|759|851|1107|1445|609|831|1281|1249|241|1041|1199|317|685|1395|523|1361|783|843|271|641|1383|821|933|1527|957|1161|577|1223|715|787|865|741|979|969|1459|265|361|459|503|723|1257|693|807|675|445|349|1021|409|1473|983|619|235|855|1429|513|313|581|637|683|1127|817|1177|559|849|369|1129|1285|1151|713|989|1089|1003|485|1005|343|613|707|747|605|593|603|699|639|5…	4.64e-13		GO:0010628	1250445566245355	0
1147	95	GO Biological Process		Response to abiotic stimulus	3.19e-11	C12orf5|MMP2|PLAT|NFKB1|CCND1|IGFBP2|EGR1|PIN1|MYOD1|RAF1|PPP1R1B|KRAS|EIF2S1|MBD2|CCNB1|CDK4|MDM2|SLC6A4|PDGFRB|MAPK3|YWHAE|DNMT3A|SRF|SORD|TP53|CCNA2|EGFR|APP|AKR1B1|PPARG|KIT|HK2|BAX|PSME3|LRP5|FABP1|IGF1|KCNK3|PPARD|PKM|PPP1CA|P4HB|CALCA|ATP6V0A2|PKLR|EIF4EBP1|MAPT|PTPN11|PPP1CC|ATP7A|FYN|VCP|TGFBR2|MTOR|ACTA1|INTS7|PAPPA2|LMNA|IVL|HTR1B|IRAK1|FMR1|ANXA7|SRC|ANXA1|TEK|RBBP7|CHEK2|FECH|AKT2|GR…	202	1521|781|529|437|377|1427|851|609|1281|241|751|317|765|1113|685|1395|523|843|557|933|1001|551|1223|1543|865|979|969|361|769|459|723|727|1403|229|445|631|1473|1115|855|1471|837|1533|849|949|1419|901|1297|1285|881|591|1509|397|1487|593|603|785|1179|519|1069|1071|945|951|365|815|1405|1215|929|283|677|877|1271|553|1043|1507|1277|1117|749|1499|389|457|1157|755|887|277|701|1141|243|1111|421|467|1145|97…	4.75e-13		GO:0009628	1249620931694282	0
109	28	Reactome Pathways		Mitotic Prophase	3.5e-12	MAPK1|PPP2CB|CCNB1|LMNB1|MAPK3|RB1|H2AFZ|PLK1|H2AFV|BANF1|PPP2R1B|PPP2R1A|HIST1H2AJ|HIST2H2AC|HIST1H2AD|LMNA|SET|MASTL|HIST1H2AC|CDK1|PPP2R2D|PRKCA|PPP2CA|H2AFX|H2AFJ|ARPP19|CTDNEP1|H2AFB1	202	809|729|685|1259|933|787|349|299|839|1423|1495|1163|789|1391|931|519|563|1295|1009|1449|845|497|379|1145|1027|547|1209|1243	5.31e-13		HSA-68875	1.24559e+16	0
747	73	GO Biological Process		Regulation of proteolysis	3.62e-11	PLAT|VTN|ENO1|C3|RAF1|APOE|SCO1|MDM2|AXIN1|MAPK3|YWHAE|CUL3|AMBP|EGF|IDE|RB1|TP53|WNT3A|APP|PPARG|ARAF|FGFR4|BAX|PSME3|WNT1|FABP1|PLK1|CYCS|COMMD1|F2|CLU|F2R|LPA|UBE2O|GSK3B|SERPINA7|HDAC6|LCK|PLAUR|MAPT|SFN|ANXA2|FYN|ITIH2|VCP|PARK2|FMR1|CDC20|HDAC1|SRC|IGBP1|DVL1|SNX9|GPC3|RNF14|BAD|SLC11A2|INS|DDX3X|AHSG|RHOA|ARRB2|ARRB1|SERPINE2|SERPINA1|HFE|CSNK1A1|LYN|HDAC2|CDC27|AKT1|ANXA8|MYC	202	529|505|767|1445|241|1041|869|523|1383|933|1001|1481|1083|577|1485|787|865|265|361|459|819|807|1403|229|675|631|299|873|1191|579|313|1127|999|1531|1177|607|493|915|329|1297|439|521|1509|1139|397|699|951|625|651|815|889|1211|1373|287|1013|1043|1507|1457|1499|939|1157|887|701|1141|531|1329|745|1111|421|367|1231|575|391	5.42e-13		GO:0030162	1.24413e+16	0
2014	137	GO Biological Process		Negative regulation of gene expression	3.99e-11	NUTF2|CSK|AGO2|NFKB1|CCND1|IGFBP5|ENO1|APOA1|EGR1|TARDBP|HIST1H4F|PIN1|FXR2|APOE|EIF2S1|MBD2|CCNB1|MDM2|IGF2BP3|CILP|RBL2|SRCAP|MAP2K2|SMG6|KDR|CTCF|CUL3|FGF2|DNMT3A|SRF|RB1|TP53|MTA2|APP|PPARG|FZD1|IGF2BP1|H2AFZ|HIST1H2AA|VPS35|PLK1|LSM3|MAP2K1|IGF1|H2AFV|F2|PPARD|PABPC1|SUZ12|MLXIPL|TRIM25|PPP2R1A|PPP2R2A|HIST1H2AJ|CALCA|HIST2H2AC|HDAC6|HFE2|CAPRIN1|EIF4EBP1|MAPT|HIST1H2AD|FOXM1|CTNNB1|FYN|SND1…	202	629|1237|1097|437|377|1407|767|583|851|1107|1131|609|1249|1041|765|1113|685|523|1101|251|1415|499|821|1085|371|957|1481|1161|551|1223|787|865|1459|361|459|503|693|349|1103|1021|299|233|409|1473|839|579|855|513|285|683|1057|1163|879|789|849|1391|493|369|883|901|1297|931|713|989|1509|987|1003|485|613|707|747|1381|617|1061|1505|699|639|1019|1093|691|951|1099|563|923|365|357|267|651|815|657|889|1197|…	5.99e-13		GO:0010629	1.2399e+16	0
144	30	KEGG Pathways		Alcoholism	4.39e-11	MAPK1|HIST1H4F|RAF1|PPP1R1B|KRAS|MAPK3|BRAF|ARAF|H2AFZ|HIST1H2AA|MAP2K1|H2AFV|PPP1CA|HIST1H2AJ|HIST2H2AC|HDAC6|HIST1H2AD|PPP1CC|NRAS|HDAC1|HIST1H2AC|GRB2|SLC29A1|PPP1CB|SHC1|HRAS|HDAC2|H2AFX|H2AFJ|H2AFB1	202	809|1131|241|751|317|933|1257|819|349|1103|409|839|837|789|1391|493|931|881|1451|651|1009|1271|553|1277|803|277|421|1145|1027|1243	6.8e-13		hsa05034	1.23575e+16	0
550	61	GO Biological Process		Positive regulation of protein kinase activity	4.51e-11	DVL2|MAPK1|CSK|CCND1|EGR1|RAF1|KRAS|CCNB1|PPP2R3C|PDGFRB|AXIN1|MAP2K2|MAPK3|FGF2|EGF|ERBB3|ERBB2|EGFR|FLT1|WNT3A|APP|KIT|BRAF|IGFBP6|MAP2K1|IGF1|INSR|CLU|DVL3|F2R|STK25|CALCA|PTPN11|FYN|TGFBR2|MTOR|FCGR1A|IRAK1|SRC|STK24|SPRY2|PRKCZ|SNX9|PDCD10|MST4|CDK1|INS|KSR1|DDX3X|TF|IGF2|FGFR1|RHOA|SHC1|HRAS|ARRB1|PPP2CA|STK3|NTRK1|AKT1|CD24	202	431|809|1237|377|851|241|317|685|1379|557|1383|821|933|1161|577|715|741|969|1387|265|361|723|1257|1293|409|1473|983|313|581|1127|1523|849|1285|1509|1487|593|407|945|815|247|1253|415|1373|255|399|1449|1457|1375|1499|1189|401|1123|1157|803|277|701|379|1439|467|1231|1175	6.81e-13		GO:0045860	1.23458e+16	0
1977	135	Reactome Pathways		Metabolism of proteins	4.83e-11	ST6GALNAC1|PPP2R5B|PMM1|CTSG|GZMH|GNPNAT1|MMP2|SCG3|FKBP14|SKP1|APOB|IGFBP2|IGFBP5|APOA1|TTR|C3|APOE|GFPT2|CCNA1|EIF2S1|CCT7|MDM2|DERL1|AXIN1|CUL3|CP|DNMT3A|RAB7A|VDAC1|IDE|PMM2|ASGR1|TP53|IGFBP4|RAB5A|CCNA2|PLA2G7|IGFBP1|CCT6A|CCT5|APP|CCT8|PPARG|FUK|PSME3|EIF4A1|CCT3|ALB|H2AFZ|HIST1H2AA|RAD21|CCT2|KLK1|IGFBP6|IGF1|CXCL8|GLB1|COMMD1|F2|PLG|HLTF|PABPC1|KLK2|KLK3|VAMP2|SUZ12|TCP1|APOL1|MPI|MMP1|TR…	202	681|663|1435|1301|1341|451|781|1169|1441|1195|679|1427|1407|583|1303|1445|1041|1519|671|765|1311|523|861|1383|1481|1339|551|633|967|1485|333|403|865|335|1023|979|1283|1279|455|601|361|1261|459|853|229|1037|347|515|349|1103|1287|1075|1431|1293|1473|301|1251|1191|579|281|235|513|1275|257|501|285|911|331|771|997|1057|925|1533|789|903|559|849|1391|329|901|931|989|441|1005|1477|1377|463|1139|275|397|1…	7.57e-13		HSA-392499	1.23161e+16	0
198	36	GO Biological Process		Response to reactive oxygen species	5.47e-11	MAPK1|MMP2|PPP2CB|APOE|PDGFRA|MDM2|PDGFRB|MAPK3|CCNA2|EGFR|FABP1|MAPK7|STK25|HDAC6|MAPT|ATP7A|FYN|HP|APOA4|PPP1R15B|S100A7|SRC|STK24|ANXA1|FKBP1B|PDCD10|MST4|BAD|CDK1|MB|BCL2|RELA|HDAC2|CCS|LDHA|AKT1	202	809|781|729|1041|509|523|557|933|979|969|631|1429|1523|493|1297|591|1509|875|463|1369|1233|815|247|1405|643|255|399|1043|1449|1117|749|389|421|1165|971|1231	8.3e-14		GO:0000302	1226201267366657	0
569	62	GO Biological Process		Cellular response to hormone stimulus	5.53e-11	CSK|SLC5A5|GCK|RPS6KB1|NFKB1|APOB|IGFBP2|YWHAH|MYOD1|G6PC|CDK4|MDM2|PAX8|IDE|RB1|CCNA2|EGFR|IGFBP1|PPARG|KIT|WNT1|PRKCI|INSR|IRS1|YWHAG|PPARD|VAMP2|PKM|GSK3B|ATP6V0A2|PKLR|EIF4EBP1|PTPN11|CTNNB1|CTSB|FYN|MAX|IRS4|SRC|AR|IRS2|ANXA1|PRKCZ|PTPRA|FECH|AKT2|GRB2|RNF14|THRB|INS|VIMP|RELA|FHL2|IGF2|RHOA|SHC1|RXRA|EIF4E|LYN|TSHR|AKT1|DENND4C	202	1237|835|871|337|437|679|1427|831|1281|475|1395|523|1527|1485|787|979|969|1279|459|723|675|303|983|453|895|855|501|1471|1177|949|1419|901|1285|989|985|1509|747|719|815|1197|1411|1405|415|1479|677|877|1271|1013|327|1457|731|389|305|401|1157|803|537|1201|1111|477|1231|1409	8.43e-13		GO:0032870	122572748686953	0
370	49	GO Biological Process		MAPK cascade	5.66e-11	MAPK1|NFKB1|SKP1|RAF1|KRAS|PDGFRA|PDGFRB|MAP2K2|MAPK3|KDR|YWHAE|CUL3|FGF2|EGF|ERBB3|ERBB2|RASA1|EGFR|KIT|BRAF|ARAF|FGFR4|PSME3|MAP2K1|IGF1|IRS1|MAPK7|MET|SH2D3C|CUL1|FGFR3|ERBB4|FYN|NRAS|IRAK1|YWHAB|IRS2|TEK|PTPRA|GRB2|YWHAZ|KSR1|TF|FGFR1|SHC1|HRAS|FGFR2|MARK3|MYC	202	809|437|1195|241|317|509|557|821|933|371|1001|1481|1161|577|715|741|1035|969|723|1257|819|807|229|409|1473|453|1429|637|1247|925|1323|1151|1509|1451|945|923|1411|1215|1479|1271|1143|1375|1189|1123|803|277|977|953|391	8.68e-13		GO:0000165	1.22472e+16	0
720	71	GO Biological Process		Enzyme linked receptor protein signaling pathway	5.67e-11	MAPK1|MMP2|PLAT|EGR1|RAF1|SORT1|PDGFRA|PDGFRB|FLT4|MAPK3|KDR|FGF2|EGF|IDE|ERBB3|TP53|ERBB2|RASA1|EGFR|IGFBP1|FLT1|KIT|BRAF|FGFR4|WNT1|IGF1|INSR|IRS1|GP6|MET|GSK3B|HNRNPM|ATP6V0A2|HFE2|LCK|FGFR3|EIF4EBP1|PTPN11|ERBB4|FYN|IGF2R|TGFBR2|TIAL1|SHOC2|IRS4|SRC|IRS2|PRKCZ|TEK|PTPRA|AKT2|GRB2|INS|FKBP1A|TF|IGF2|FGFR1|RHOA|SHC1|TIA1|ARRB2|HRAS|PRKCA|FGFR2|NCK1|HFE|LYN|NTRK1|AKT1|YES1|CPNE3	202	809|781|529|851|241|1155|509|557|641|933|371|1161|577|1485|715|865|741|1035|969|1279|1387|723|1257|807|675|1473|983|453|571|637|1177|443|949|369|915|1323|901|1285|1151|1509|483|1487|237|1325|719|815|1411|415|1215|1479|877|1271|1457|743|1189|401|1123|1157|803|1235|887|277|497|977|517|1329|1111|467|1231|1269|847	8.74e-13		GO:0007167	1.22464e+16	0
147	30	KEGG Pathways		Phospholipase D signaling pathway	6.89e-11	MAPK1|RAF1|KRAS|PDGFRA|PDGFRB|MAP2K2|MAPK3|AKT3|EGF|EGFR|KIT|MAP2K1|INSR|CXCL8|F2|CXCR2|F2R|PTPN11|FYN|MTOR|PLA2G4A|NRAS|AKT2|GRB2|INS|RHOA|SHC1|HRAS|PRKCA|AKT1	202	809|241|317|509|557|821|933|273|577|969|723|409|983|301|579|909|1127|1285|1509|593|1017|1451|877|1271|1457|1157|803|277|497|1231	1.09e-11		hsa04072	1.21618e+16	0
3976	220	GO Biological Process		Regulation of macromolecule biosynthetic process	6.91e-11	DVL2|PPP2R5B|PPP1R15A|MAPK1|AGO2|GCK|RPS6KB1|NFKB1|CCND1|IGFBP5|PPP3R1|ENO1|WDR77|EGR1|TARDBP|HIST1H4F|PIN1|YWHAH|MYOD1|FXR2|RAF1|APOE|FUS|CCNA1|KRAS|EIF2S1|MBD2|CDK4|CCT7|MDM2|IGF2BP3|LRP6|THOC1|CDH1|PDGFRB|RBL2|AXIN1|SRCAP|MAP2K2|MAPK3|SMG6|PAX8|KDR|CTCF|CUL3|FGF2|DNMT3A|EGF|SRF|RB1|TP53|ERBB2|CCNA2|EGFR|CCT6A|MTA2|CCT5|WNT3A|PPP1R3A|APP|GEMIN5|CCT8|PPARG|FZD1|KIT|IGF2BP1|SSU72|FGFR4|PSME3|WNT1…	202	431|663|739|809|1097|871|337|437|377|1407|585|767|1393|851|1107|1131|609|831|1281|1249|241|1041|1199|671|317|765|1113|1395|1311|523|1101|1361|783|271|557|1415|1383|499|821|933|1085|1527|371|957|1481|1161|551|577|1223|787|865|741|979|969|455|1459|601|265|777|361|495|1261|459|503|723|693|395|807|229|675|1037|445|347|303|349|1103|1287|1075|299|409|1473|983|387|453|1191|839|619|235|855|1429|513|313|5…	1.07e-12		GO:0010556	1.21605e+16	0
144	31	GO Biological Process		Positive regulation of small molecule metabolic process	7.69e-11	GCK|NFKB1|PFKFB4|ENO1|APOA1|EGF|APP|PPARG|FABP1|IGF1|INSR|IRS1|PPARD|MLXIPL|APOA4|WDR5|VCP|PFKFB2|SRC|PFKFB1|IRS2|ANXA1|AKT2|INS|IGF2|PFKFB3|APOA5|AKT1|ARPP19|APOC2|SMEK2	202	871|437|587|767|583|577|361|459|631|1473|983|453|855|683|463|275|397|1319|815|1335|1411|1405|877|1457|401|231|689|1231|547|339|1489	1.2e-13		GO:0062013	1211407366019857	0
331	46	GO Biological Process		Cellular response to peptide	7.81e-11	CSK|GCK|RPS6KB1|NFKB1|G6PC|CDK4|MDM2|IDE|TP53|CCNA2|IGFBP1|APP|AKR1B1|PPARG|WNT1|PRKCI|IGF1|INSR|IRS1|YWHAG|VAMP2|PKM|GSK3B|ATP6V0A2|PKLR|EIF4EBP1|FYN|MAX|SNX6|IRS4|SRC|IRS2|PRKCZ|PTPRA|AKT2|GRB2|INS|VIMP|RELA|IGF2|SHC1|LYN|TSHR|AKT1|DENND4C|PPP1R9B	202	1237|871|337|437|475|1395|523|1485|865|979|1279|361|769|459|675|303|1473|983|453|895|501|1471|1177|949|1419|901|1509|747|1061|719|815|1411|415|1479|877|1271|1457|731|389|401|803|1111|477|1231|1409|385	1.22e-12		GO:1901653	121073489661227	0
796	75	GO Biological Process		Membrane organization	8.15e-11	M6PR|DVL2|CETP|MICALL1|APOB|PPP3R1|APOA1|TARDBP|YWHAH|APOE|CCNB1|YWHAE|CUL3|RAB7A|EGF|TP53|RAB5A|EGFR|WHAMM|HK2|BAX|PRKCI|HSPA9|PLK1|YWHAG|BANF1|VAMP2|CLU|EEA1|PPP2R1A|GSK3B|PPP2R2A|HGS|SFN|ANXA2|AMPH|IGF2R|APOA4|ANKLE2|TFRC|DCTN1|APOA2|LMNA|S100A10|FCGR1A|YWHAB|ANXA7|DVL1|YWHAQ|AKT2|SNX9|GRB2|PPP6R3|BAD|CDK1|YWHAZ|BCL2|TF|RHOA|ARRB2|CNEP1R1|PRKCA|ARRB1|SYNJ1|PPP6R1|SERPINA1|PLTP|PPP2CA|RABEP1|AK…	202	1343|431|655|813|679|585|583|1107|831|1041|685|1001|1481|633|577|865|1023|969|1347|727|1403|303|973|299|895|1423|501|313|1315|1163|1177|879|559|439|521|1525|483|463|393|605|615|639|519|697|407|923|365|1211|833|877|1373|1271|1515|1043|1449|1143|749|1189|1157|887|1121|497|701|491|1193|531|293|379|791|1231|753|1209|309|1217|1175	1.28e-12		GO:0061024	1.20888e+16	0
17	15	Reactome Pathways		Beta-catenin phosphorylation cascade	8.89e-11	PPP2R5B|PPP2CB|PPP2R5A|AXIN1|PPP2R1B|PPP2R1A|GSK3B|PPP2R5E|CTNNB1|FRAT2|FRAT1|PPP2R5C|PPP2R5D|PPP2CA|CSNK1A1	202	663|729|1349|1383|1495|1163|1177|1389|989|311|321|799|1135|379|745	1.43e-12		HSA-196299	1.20511e+16	0
107	26	KEGG Pathways		Insulin resistance	9.46e-11	RPS6KB1|NFKB1|GFPT2|G6PC|AKT3|G6PC3|PPP1R3A|INSR|IRS1|RPS6KB2|MLXIPL|GSK3B|PPP1CA|PTPN11|PPP1CC|GFPT1|MTOR|G6PC2|IRS2|PRKCZ|AKT2|PPP1CB|INS|RELA|SLC2A1|AKT1	202	337|437|1519|475|273|1245|777|983|453|619|683|1177|837|1285|881|1377|593|897|1411|415|877|1277|1457|389|243|1231	1.52e-11		hsa04931	1.20241e+16	0
1389	106	GO Biological Process		Positive regulation of developmental process	1e-11	DVL2|PPP2R5B|UNC13D|MAPK1|AGO2|NFKB1|CCND1|APOB|APOA1|EGR1|C3|PIN1|STYXL1|MYOD1|APOE|KRAS|CCNB1|MDM2|PPP2R3C|PDGFRB|PAX8|AKT3|KDR|FGF2|EGF|SRF|ERBB3|RB1|TP53|FLT1|WNT3A|APP|PPARG|FZD1|KIT|HK2|BAX|WNT1|LRP5|PRKCI|VPS35|MAP2K1|IGF1|INSR|CTNNA1|CXCL8|PPARD|DVL3|KIAA0196|PRMT5|CXCR2|PKM|STK25|P4HB|CALCA|MKL2|CAPRIN1|MAPT|SFN|PPP1CC|ERBB4|CTNNB1|FYN|TGFBR2|TFRC|MTOR|PARK2|LMNA|S100A10|MB21D1|FMR1|CDC2…	202	431|663|1461|809|1097|437|377|679|583|851|1445|609|711|1281|1041|317|685|523|1379|557|1527|273|371|1161|577|1223|715|787|865|1387|265|361|459|503|723|727|1403|675|445|303|1021|409|1473|983|545|301|855|581|1181|941|909|1471|1523|1533|849|1129|883|1297|439|881|1151|989|1509|1487|605|593|699|519|697|561|951|625|651|815|1197|1405|415|1211|1215|643|1229|1043|1449|1457|749|389|401|1123|1157|755|887|473…	1.58e-12		GO:0051094	12	0
363	48	Reactome Pathways		Transcriptional Regulation by TP53	1.05e-10	C12orf5|AGO2|PPP2CB|PIN1|YWHAH|SCO1|CCNA1|CCNB1|MDM2|RBL2|AKT3|YWHAE|TP53|CCNA2|MTA2|BAX|YWHAG|CYCS|PPP2R1B|PRMT5|PPP2R1A|SFN|CCNG1|CHD4|GATAD2A|MTOR|GATAD2B|YWHAB|RBBP4|HDAC1|RBL1|RBBP7|CHD3|IGFBP3|YWHAQ|CHEK2|AKT2|G6PD|CDK1|YWHAZ|CHEK1|GPI|PRMT1|PPP2R5C|PPP2CA|HDAC2|AKT1|CTDP1	202	1521|1097|729|609|831|869|671|685|523|1415|273|1001|865|979|1459|1403|895|873|1495|941|1163|439|569|1351|617|593|1019|923|267|651|657|929|1337|1229|833|283|877|1045|1449|1143|457|1541|473|799|379|421|1231|1063	1.74e-12		HSA-3700989	1.19788e+16	0
2583	161	GO Biological Process		Cellular component biogenesis	1.19e-10	SF3A1|SNRPD3|AGO2|FBL|VTN|APOC3|SKP1|APOB|WDR77|APOA1|HIST1H4F|RAF1|APOE|FUS|SCO1|EIF2S1|MBD2|CCNB1|PDGFRA|MDM2|COX17|CDH1|PDGFRB|AXIN1|MAPK3|STRN|CTCF|YWHAE|CUL3|DNMT3A|RAB7A|EGF|TRPV5|SRF|SNRPF|TP53|PFKL|GEMIN7|SNRPG|GEMIN6|WNT3A|APP|RHOC|GEMIN5|WHAMM|CCT8|FZD1|KIT|CCT3|PRKCI|IFT122|ABCE1|HSPA9|VPS35|CCT2|PLK1|SNRPD1|LSM3|CTNNA1|YWHAG|GEMIN2|VAMP2|CLU|TCP1|KIAA0196|PRMT5|GEMIN4|ULK1|PPP2R1A|GSK…	202	411|773|1097|1353|505|429|1195|679|1393|583|1131|241|1041|1199|869|765|1113|685|509|523|991|271|557|1383|933|793|957|1001|1481|551|633|577|1059|1223|1421|865|1095|527|417|1173|265|361|279|495|1347|1261|503|723|347|303|1367|1469|973|1021|1075|299|935|233|545|895|611|501|313|911|1181|941|905|1433|1163|1177|1523|925|1533|559|493|1305|1297|1151|1119|1091|989|591|1089|521|485|463|747|397|423|1065|615|…	1.89e-12		GO:0044085	1192445303860747	0
2840	172	GO Biological Process		Heterocycle metabolic process	1.28e-10	SF3A1|SNRPD3|MAPK1|PMM1|PAPOLA|GNPNAT1|AGO2|FBL|GCK|ALDOC|NFKB1|CCND1|ENO1|WDR77|TTR|CPSF3|PAPOLG|TARDBP|HIST1H4F|SYMPK|MBD4|GFPT2|G6PC|PPP1R1B|FUS|LGALS3|CCNB1|CDK4|THOC1|MAPK3|SMG6|PAX8|CTCF|DNMT3A|AMBP|SRF|HPX|SNRPF|PMM2|TP53|PFKL|GEMIN7|SNRPG|MTA2|GEMIN6|APP|GEMIN5|PPARG|FUK|HK2|SSU72|FLAD1|HK3|BAX|GNPDA2|RAD21|CPSF2|SNRPD1|LSM3|HINT1|COMMD1|GEMIN2|INTS6|PPARD|ADPGK|PABPC1|RBBP6|MPI|PRMT5|SNA…	202	411|773|809|1435|1513|451|1097|1353|871|1291|437|377|767|1393|1303|1265|891|1107|1131|1497|599|1519|475|751|1199|1039|685|1395|783|933|1085|1527|957|551|1083|1223|1493|1421|333|865|1095|527|417|1459|1173|361|495|459|853|727|395|373|567|1403|353|1287|1467|935|233|387|1191|611|1539|855|1273|513|471|771|941|1205|1471|905|1057|1263|1163|879|443|541|1545|1419|1297|713|1119|1091|591|1089|993|987|307|52…	2.05e-12		GO:0046483	1.18928e+16	0
397	50	GO Biological Process		Positive regulation of cellular catabolic process	1.67e-10	AGO2|PFKFB4|APOA1|TARDBP|APOE|MDM2|AXIN1|MAPK3|KDR|CUL3|EGF|RB1|APP|HK2|BAX|FABP1|VPS35|PLK1|IGF1|INSR|IRS1|PABPC1|CLU|MLXIPL|ULK1|GSK3B|HDAC6|APOA4|VCP|PARK2|PFKFB2|YTHDF1|FMR1|CDC20|PFKFB1|IRS2|DVL1|AKT2|SNX9|RNF14|BAD|ULK2|INS|CSNK1A1|CDC27|PFKFB3|APOA5|AKT1|APOC2|UPF1	202	1097|587|583|1107|1041|523|1383|933|371|1481|577|787|361|727|1403|631|1021|299|1473|983|453|513|313|683|1433|1177|493|463|397|699|1319|691|951|625|1335|1411|1211|877|1373|1013|1043|913|1457|745|367|231|689|1231|339|959	2.68e-12		GO:0031331	1.17773e+16	0
161	32	GO Biological Process		Regulation of generation of precursor metabolites and energy	1.91e-10	C12orf5|GCK|PFKFB4|CCNB1|KHK|COX17|IDE|TP53|PPP1R3A|APP|IGF1|INSR|IRS1|MLXIPL|GSK3B|PPP1CA|ATP7A|VCP|MTOR|PFKFB2|PFKFB1|IRS2|AKT2|CDK1|PPP1CB|INS|VIMP|IGF2|RHOA|FBP1|PFKFB3|AKT1	202	1521|871|587|685|425|991|1485|865|777|361|1473|983|453|683|1177|837|591|397|593|1319|1335|1411|877|1449|1277|1457|731|401|1157|647|231|1231	3.08e-12		GO:0043467	1.1719e+16	0
4426	236	GO Biological Process		System development	2.18e-10	DVL2|CTTNBP2|PPP2R5B|C12orf5|MAPK1|MICALL1|GNPNAT1|MMP2|CSK|TG|VTN|CCND1|APOB|SNX17|IGFBP5|WDR77|APOA1|EGR1|ATP7B|GOT2|C3|PIN1|STYXL1|YWHAH|MYOD1|RAF1|APOE|KRAS|MBD2|CCNB1|PDGFRA|CDK4|MDM2|IGF2BP3|COX17|LRP6|PPP2R3C|SLC6A4|CDH1|PDGFRB|FLT4|MAPK3|PAX8|STRN|KDR|TREH|YWHAE|CUL3|FGF2|DNMT3A|PPP2R3A|EGF|SRF|ERBB3|RB1|NKD1|TP53|ERBB2|CCNA2|RASA1|EGFR|FLT1|WNT3A|APP|AKR1B1|PPARG|FZD1|KIT|BRAF|IGF2BP1|HK…	202	431|1137|663|1521|809|813|451|781|1237|1417|505|377|679|573|1407|1393|583|851|1309|737|1445|609|711|831|1281|241|1041|317|1113|685|509|1395|523|1101|991|1361|1379|843|271|557|641|933|1527|793|371|1203|1001|1481|1161|551|1365|577|1223|715|787|867|865|741|979|1035|969|1387|265|361|769|459|503|723|1257|693|727|1403|675|445|303|1367|973|1021|409|1473|983|323|545|1115|895|301|579|281|855|1429|313|581|…	3.53e-12		GO:0048731	1.16615e+16	0
29	16	KEGG Pathways		Pentose phosphate pathway	2.21e-10	ALDOC|PFKL|TKTL2|TALDO1|PFKM|TKTL1|FBP2|PFKP|PGM2|G6PD|GLYCTK|TKT|GPI|FBP1|DERA|H6PD	202	1291|1095|919|1483|1089|1183|1255|1535|801|1045|995|1007|1541|647|1517|1331	3.62e-11		hsa00030	1165560772631489	0
433	52	GO Biological Process		Endocytosis	2.73e-10	M6PR|MAPK1|MICALL1|VTN|APOB|SNX17|APOA1|APOE|SORT1|DNAJC13|LRP6|SNX1|MAPK3|RAB7A|AMBP|HPX|ASGR1|RAB5A|APP|LRP5|ALB|INSR|CXCL8|VAMP2|APOL1|EEA1|CXCR2|CALCA|ASGR2|HP|AMPH|IGF2R|TGFBR2|TFRC|FCGR1A|HTR1B|SNX5|SNX2|SNX9|GRB2|AHSG|JMJD6|ARRB2|HRAS|ARRB1|SYNJ1|TFR2|HPR|RABEP1|ANKFY1|EHD1|XKR5	202	1343|809|813|505|679|573|583|1041|1155|667|1361|289|933|633|1083|1493|403|1023|361|445|515|983|301|501|331|1315|909|849|441|875|1525|483|1487|605|407|1071|447|533|1373|1271|939|351|887|277|701|491|435|1047|791|753|1081|1217	4.44e-12		GO:0006897	1.15638e+16	0
2659	163	GO Biological Process		Nucleobase-containing compound metabolic process	2.97e-10	SF3A1|SNRPD3|MAPK1|PMM1|PAPOLA|GNPNAT1|AGO2|FBL|GCK|ALDOC|NFKB1|CCND1|ENO1|WDR77|TTR|CPSF3|PAPOLG|TARDBP|HIST1H4F|SYMPK|MBD4|GFPT2|PPP1R1B|FUS|LGALS3|CCNB1|CDK4|THOC1|MAPK3|SMG6|PAX8|CTCF|DNMT3A|SRF|SNRPF|PMM2|TP53|PFKL|GEMIN7|SNRPG|MTA2|GEMIN6|APP|GEMIN5|PPARG|FUK|HK2|SSU72|FLAD1|HK3|BAX|GNPDA2|RAD21|CPSF2|SNRPD1|LSM3|HINT1|COMMD1|GEMIN2|INTS6|PPARD|ADPGK|PABPC1|RBBP6|MPI|PRMT5|SNAPC5|PKM|GEMIN4…	202	411|773|809|1435|1513|451|1097|1353|871|1291|437|377|767|1393|1303|1265|891|1107|1131|1497|599|1519|751|1199|1039|685|1395|783|933|1085|1527|957|551|1223|1421|333|865|1095|527|417|1459|1173|361|495|459|853|727|395|373|567|1403|353|1287|1467|935|233|387|1191|611|1539|855|1273|513|471|771|941|1205|1471|905|1057|1263|1163|879|443|541|1545|1419|1297|713|1119|1091|1089|993|987|307|525|343|1377|747|397…	4.85e-12		GO:0006139	1.15272e+16	0
1899	129	GO Biological Process		Interspecies interaction between organisms	3.1e-11	UNC13D|MAPK1|CTSG|NFKB1|SKP1|APOB|ENO1|EGR1|TARDBP|C3|APOE|LGALS3|PDGFRA|CDK4|MDM2|DERL1|IPO5|THOC1|CDH1|SRCAP|MAPK3|KDR|YWHAE|RAB7A|AMBP|VDAC1|HPX|IDE|RB1|ASGR1|TP53|RAB5A|CCNA2|EGFR|CCT5|VPS26B|APP|PPARG|BAX|PSME3|EIF4A1|ABCE1|VPS35|BUB1|INSR|CXCL8|F2|PLG|BANF1|PPARD|MID1|KLK3|CLU|MET|TCP1|APOL1|EEA1|F2R|MMP1|TRIM25|ULK1|PPP1CA|CUL1|CALCA|LAMP1|ATP4B|LCK|CTNNB1|CTSB|ATP7A|ANXA2|FYN|SND1|ASGR2|H…	202	1461|809|1301|437|1195|679|767|851|1107|1445|1041|1039|509|1395|523|861|461|783|271|499|933|371|1001|633|1083|967|1493|1485|787|403|865|1023|979|969|601|1385|361|459|1403|229|1037|1469|1021|1511|983|301|579|281|1423|855|1503|257|313|637|911|331|1315|1127|997|1057|1433|837|925|849|1355|1463|915|989|985|591|521|1509|987|441|875|483|463|397|423|605|1065|921|699|639|1233|407|945|561|951|563|923|651|8…	5.09e-12		GO:0044419	1.15086e+16	0
2096	138	GO Biological Process		Regulation of multicellular organismal development	3.13e-10	DVL2|PPP2R5B|APOH|MAPK1|AGO2|TG|CCND1|WDR77|APOA1|EGR1|HIST1H4F|C3|PIN1|STYXL1|YWHAH|MYOD1|APOE|LGALS3|CCNB1|MDM2|PPP2R3C|THOC1|SLC6A4|PDGFRB|PAX8|AKT3|KDR|FGF2|PPP2R3A|EGF|SRF|ERBB3|RB1|NKD1|TP53|ERBB2|EGFR|MYL9|FLT1|WNT3A|APP|PPARG|FZD1|KIT|HK2|BAX|PSME3|WNT1|PRKCI|IFT122|HSPA9|VPS35|MAP2K1|IGF1|INSR|CTNNA1|YWHAG|CXCL8|F2|PPARD|MAPK7|KLK3|DVL3|KIAA0196|PRMT5|CXCR2|PKM|FZD2|GSK3B|STK25|DENND5A|H…	202	431|663|239|809|1097|1417|377|1393|583|851|1131|1445|609|711|831|1281|1041|1039|685|523|1379|783|843|557|1527|273|371|1161|1365|577|1223|715|787|867|865|741|969|779|1387|265|361|459|503|723|727|1403|229|675|303|1367|973|1021|409|1473|983|545|895|301|579|855|1429|257|581|1181|941|909|1471|817|1177|1523|449|559|849|1129|883|1297|1285|439|881|1151|989|1509|1003|275|1487|605|593|699|691|951|625|651|8…	5.17e-12		GO:2000026	1.15045e+16	0
911	80	GO Biological Process		Response to organic cyclic compound	3.15e-10	MAPK1|SLC5A5|NFKB1|CCND1|APOB|IGFBP2|IGFBP5|EGR1|GOT2|YWHAH|MBD4|MYOD1|G6PC|PPP1R1B|KRAS|MBD2|CCNB1|CDK4|MDM2|LRP6|SLC6A4|CDH1|PDGFRB|MAPK3|DNMT3A|RB1|CCNA2|EGFR|APP|PPARG|FUK|H2AFZ|CTNNA1|GLB1|PPARD|TRIM25|GSK3B|PPP2R2A|PAPPA|PKLR|WNT8B|EIF4EBP1|CTNNB1|STRN3|APOA4|TGFBR2|MTOR|ACTA1|PARK2|APOA2|HTR1B|MB21D1|ANXA7|SRC|AR|PFKFB1|ANXA1|DDX58|TEK|RBBP7|FKBP1B|CHEK2|FECH|G6PD|RNF14|BAD|CDK1|THRB|BCL2|…	202	809|835|437|377|679|1427|1407|851|737|831|599|1281|475|751|317|1113|685|1395|523|1361|843|271|557|933|551|787|979|969|361|459|853|349|545|1251|855|1057|1177|879|903|1419|245|901|989|613|463|1487|593|603|699|639|1071|561|365|815|1197|1335|1405|1053|1215|929|643|283|677|1045|1013|1043|1449|327|749|389|305|1157|887|537|1201|1111|421|971|1231|385	5.22e-12		GO:0014070	115016894462104	0
189	34	Reactome Pathways		ESR-mediated signaling	3.6e-11	MAPK1|MMP2|AGO2|CCND1|KRAS|AXIN1|MAPK3|AKT3|STRN|EGF|SRF|EGFR|H2AFZ|RAD21|H2AFV|HIST1H2AJ|HIST2H2AC|HIST1H2AD|ERBB4|NRAS|HDAC1|SRC|HIST1H2AC|PRKCZ|AKT2|BCL2|SHC1|PRMT1|HRAS|H2AFX|H2AFJ|AKT1|MYC|H2AFB1	202	809|781|1097|377|317|1383|933|273|793|577|1223|969|349|1287|839|789|1391|931|1151|1451|651|815|1009|415|877|749|803|473|277|1145|1027|1231|391|1243	6.13e-12		HSA-8939211	1.14437e+16	0
5841	289	GO Biological Process		Developmental process	3.64e-10	DVL2|CTTNBP2|PPP2R5B|C12orf5|UNC13D|MAPK1|MICALL1|GNPNAT1|MMP2|CSK|AGO2|TG|FBL|MEST|VTN|ALDOC|CCND1|APOB|SNX17|IGFBP2|IGFBP5|WDR77|APOA1|EGR1|ATP7B|GOT2|C3|PIN1|STYXL1|YWHAH|MYOD1|RAF1|APOE|G6PC|LGALS3|CCNA1|KRAS|EIF2S1|MBD2|CCNB1|SORT1|PDGFRA|CDK4|MDM2|IGF2BP3|DNAJC13|COX17|LRP6|PPP2R3C|SLC6A4|CDH1|PDGFRB|SNX1|FLT4|RBL2|AXIN1|MAPK3|PAX8|STRN|KDR|TREH|YWHAE|CUL3|FGF2|DNMT3A|PPP2R3A|EGF|VDAC1|SRF|…	202	431|1137|663|1521|1461|809|813|451|781|1237|1097|1417|1353|829|505|1291|377|679|573|1427|1407|1393|583|851|1309|737|1445|609|711|831|1281|241|1041|475|1039|671|317|765|1113|685|1155|509|1395|523|1101|667|991|1361|1379|843|271|557|289|641|1415|1383|933|1527|793|371|1203|1001|1481|1161|551|1365|577|967|1223|1485|715|787|867|865|741|979|1035|969|1279|1387|265|361|279|769|459|503|723|1257|693|727|807…	6.06e-12		GO:0032502	1.14389e+16	0
216	36	GO Biological Process		Regulation of carbohydrate metabolic process	5.1e-11	C12orf5|GCK|NFKB1|PFKFB4|KHK|EGF|TP53|IGFBP4|PPP1R3A|APP|IGF1|INSR|IRS1|MLXIPL|GSK3B|PPP1CA|WDR5|MTOR|PARK2|PFKFB2|SRC|PFKFB1|IRS2|IGFBP3|AKT2|BAD|PPP1CB|INS|VIMP|LCMT1|IGF2|FBP1|PFKFB3|AKT1|ARPP19|SMEK2	202	1521|871|437|587|425|577|865|335|777|361|1473|983|453|683|1177|837|275|593|699|1319|815|1335|1411|1229|877|1043|1277|1457|731|797|401|647|231|1231|547|1489	8.53e-12		GO:0006109	1.12924e+16	0
87	23	KEGG Pathways		Longevity regulating pathway	5.27e-10	RPS6KB1|NFKB1|KRAS|AKT3|TP53|PPARG|BAX|IGF1|INSR|IRS1|RPS6KB2|ULK1|ATG101|EIF4EBP1|MTOR|NRAS|IRS4|IRS2|AKT2|INS|RELA|HRAS|AKT1	202	337|437|317|273|865|459|1403|1473|983|453|619|1433|1305|901|593|1451|719|1411|877|1457|389|277|1231	8.78e-11		hsa04211	1.12782e+16	0
117	26	KEGG Pathways		Carbon metabolism	5.28e-10	GCK|ALDOC|ENO1|GOT2|PFKL|TKTL2|HK2|HK3|ADPGK|PKM|TALDO1|ENO3|PKLR|PFKM|HKDC1|TKTL1|FBP2|PFKP|G6PD|GLYCTK|TKT|HK1|GPI|FBP1|ENO2|H6PD	202	871|1291|767|737|1095|919|727|567|1273|1471|1483|1263|1419|1089|993|1183|1255|1535|1045|995|1007|1219|1541|647|1109|1331	8.96e-11		hsa01200	1.12774e+16	0
776	72	GO Biological Process		Viral process	5.47e-10	MAPK1|SKP1|APOE|PDGFRA|MDM2|DERL1|IPO5|SRCAP|MAPK3|KDR|YWHAE|RAB7A|AMBP|VDAC1|HPX|IDE|RB1|ASGR1|TP53|RAB5A|CCNA2|EGFR|BAX|PSME3|EIF4A1|ABCE1|VPS35|BUB1|INSR|BANF1|EEA1|MMP1|TRIM25|PPP1CA|CUL1|LAMP1|LCK|CTNNB1|CTSB|ANXA2|FYN|SND1|ASGR2|VCP|G3BP2|TFRC|EIF3B|APOA2|IRAK1|MB21D1|FMR1|SET|YWHAB|SRC|RBL1|DDX58|GRB2|G3BP1|BAD|CDK1|DDX3X|RELA|RHOA|SHC1|EIF4G1|RXRA|EIF4E|LYN|H2AFX|UPF1|DDX6|VPS29	202	809|1195|1041|509|523|861|461|499|933|371|1001|633|1083|967|1493|1485|787|403|865|1023|979|969|1403|229|1037|1469|1021|1511|983|1423|1315|997|1057|837|925|1355|915|989|985|521|1509|987|441|397|423|605|1065|639|945|561|951|563|923|815|657|1053|1271|1241|1043|1449|1499|389|1157|803|1397|537|1201|1111|1145|959|363|253	9.2e-13		GO:0016032	1126201267366657	0
867	77	GO Biological Process		Peptidyl-amino acid modification	5.67e-10	MAPK1|CSK|FKBP14|RPS6KB1|APOA1|PIN1|MYOD1|CCNB1|PDGFRA|MDM2|PDGFRB|FLT4|SRCAP|MAP2K2|MAPK3|AKT3|KDR|EGF|ERBB3|ASGR1|ERBB2|EGFR|FLT1|KIT|FGFR4|PRKCI|WDR82|PLK1|MAP2K1|INSR|COPRS|MAPK7|SUZ12|MET|PRMT5|ULK1|GSK3B|P4HB|HDAC6|LCK|FGFR3|ERBB4|PRMT7|ATP7A|FYN|ASGR2|IGF2R|WDR5|TGFBR2|MTOR|APOA2|IVL|MKNK1|SRC|MASTL|PRKCZ|TEK|FKBP1B|CHEK2|AKT2|FKBP2|CDK1|BCL2|FKBP1A|CHEK1|FGFR1|JMJD6|PRMT1|PRKCA|ARRB1|FGFR…	202	809|1237|1441|337|583|609|1281|685|509|523|557|641|499|821|933|273|371|577|715|403|741|969|1387|723|807|303|1313|299|409|983|323|1429|285|637|941|1433|1177|1533|493|915|1323|1151|1091|591|1509|441|483|275|1487|593|639|1069|249|815|1295|415|1215|643|283|877|1033|1449|749|743|457|1123|351|473|497|701|977|953|745|1111|467|1231|1269	9.57e-12		GO:0018193	1.12464e+16	0
1230	96	GO Biological Process		Regulation of cell cycle	5.76e-10	PPP2R5B|PPP1R15A|RPS6KB1|CCND1|SKP1|TARDBP|PIN1|CCNA1|CCNB1|CDK4|MDM2|LRP6|IPO5|THOC1|SLC6A4|PDGFRB|RBL2|MAP2K2|CTCF|YWHAE|CUL3|EGF|RB1|TP53|CCNA2|EGFR|APP|WHAMM|BAX|PSME3|LRP5|RAD21|PLK1|MAP2K1|BUB1|IGF1|INSR|YWHAG|CXCL8|SUZ12|PRMT5|MLXIPL|PPP2R1A|STK25|CUL1|EIF4EBP1|PTPN11|SFN|FOXM1|CTNNB1|CCNG1|SND1|MAX|MTOR|DCTN1|FGFR1OP|INTS7|TIPRL|CDC20|RBBP4|SRC|RBL1|MASTL|PPP1R10|STK24|ANXA1|RBBP7|CHEK2|P…	202	663|739|337|377|1195|1107|609|671|685|1395|523|1361|461|783|843|557|1415|821|957|1001|1481|577|787|865|979|969|361|1347|1403|229|445|1287|299|409|1511|1473|983|895|301|285|941|683|1163|1523|925|901|1285|439|713|989|569|987|747|593|615|907|785|811|625|267|815|657|1295|539|247|1405|929|283|1475|877|399|1449|1457|749|797|1499|457|401|1123|1157|755|1453|473|277|497|977|799|665|1397|1201|1439|1145|367…	9.77e-12		GO:0051726	1.12396e+16	0
269	40	GO Biological Process		Cellular response to peptide hormone stimulus	5.76e-10	CSK|GCK|RPS6KB1|NFKB1|G6PC|CDK4|MDM2|IDE|CCNA2|IGFBP1|PPARG|WNT1|PRKCI|INSR|IRS1|YWHAG|VAMP2|PKM|GSK3B|ATP6V0A2|PKLR|EIF4EBP1|FYN|MAX|IRS4|SRC|IRS2|PRKCZ|PTPRA|AKT2|GRB2|INS|VIMP|RELA|IGF2|SHC1|LYN|TSHR|AKT1|DENND4C	202	1237|871|337|437|475|1395|523|1485|979|1279|459|675|303|983|453|895|501|1471|1177|949|1419|901|1509|747|719|815|1411|415|1479|877|1271|1457|731|389|401|803|1111|477|1231|1409	9.79e-12		GO:0071375	1.12396e+16	0
605	62	Reactome Pathways		Hemostasis	6.01e-10	PPP2R5B|APOH|MAPK1|CSK|SCG3|PLAT|PPP2CB|APOB|APOA1|RAF1|KRAS|PPP2R5A|MAPK3|EGF|TP53|RAB5A|APP|ALB|IGF1|F2|GP6|PLG|PPP2R1B|CLU|KIF1C|F2R|MMP1|PPP2R1A|PPP2R5E|LCK|PLAUR|PTPN11|ANXA2|FYN|PLA2G4A|S100A10|NRAS|HDAC1|SRC|PRKCZ|TEK|GRB2|YWHAZ|TF|IGF2|AHSG|RHOA|SHC1|ARRB2|HRAS|PRKCA|ARRB1|PPP2R5C|SERPINE2|SERPINA1|PPP2R5D|PPP2CA|LYN|HDAC2|AKT1|YES1|EHD1	202	663|239|809|1237|1169|529|729|679|583|241|317|1349|933|577|865|1023|361|515|1473|579|571|281|1495|313|263|1127|997|1163|1389|915|329|1285|521|1509|1017|697|1451|651|815|415|1215|1271|1143|1189|401|939|1157|803|887|277|497|701|799|1141|531|1135|379|1111|421|1231|1269|1081	1.05e-11		HSA-109582	1122112552799726	0
88	23	KEGG Pathways		PD-L1 expression and PD-1 checkpoint pathway in cancer	6.22e-10	MAPK1|RPS6KB1|NFKB1|PPP3R1|RAF1|KRAS|MAP2K2|MAPK3|AKT3|EGF|EGFR|MAP2K1|RPS6KB2|LCK|PTPN11|MTOR|NRAS|AKT2|PPP3CB|PPP3CA|RELA|HRAS|AKT1	202	809|337|437|585|241|317|821|933|273|577|969|409|619|915|1285|593|1451|877|1363|1371|389|277|1231	1.07e-10		hsa05235	1.12062e+16	0
39	18	GO Biological Process		Spliceosomal snRNP assembly	7.47e-10	SNRPD3|WDR77|SNRPF|GEMIN7|SNRPG|GEMIN6|GEMIN5|SNRPD1|GEMIN2|PRMT5|GEMIN4|SNRPD2|PRMT7|DDX20|GEMIN8|SNRPE|SNRPB|CLNS1A	202	773|1393|1421|527|417|1173|495|935|611|941|905|1119|1091|1093|1529|763|795|1317	1.29e-11		GO:0000387	111266793981846	0
80	23	GO Biological Process		Positive regulation of carbohydrate metabolic process	1.15e-09	C12orf5|GCK|NFKB1|PFKFB4|EGF|APP|IGF1|INSR|IRS1|MLXIPL|WDR5|PFKFB2|SRC|PFKFB1|IRS2|AKT2|BAD|INS|IGF2|PFKFB3|AKT1|ARPP19|SMEK2	202	1521|871|437|587|577|361|1473|983|453|683|275|1319|815|1335|1411|877|1043|1457|401|231|1231|547|1489	2e-12		GO:0045913	1093930215964639	0
376	47	Reactome Pathways		M Phase	1.17e-09	PPP2R5B|MAPK1|PPP2CB|CCNB1|LMNB1|PPP2R5A|MAPK3|SGOL1|YWHAE|RB1|PSME3|H2AFZ|RAD21|PLK1|BUB1|YWHAG|H2AFV|BANF1|PPP2R1B|PPP2R1A|PPP2R2A|HIST1H2AJ|HIST2H2AC|PPP2R5E|HIST1H2AD|PPP1CC|ANKLE2|DCTN1|FGFR1OP|LMNA|CDC20|SET|MASTL|HIST1H2AC|CDK1|PPP2R2D|PRKCA|PPP2R5C|PPP2R5D|PPP2CA|H2AFX|CDC27|H2AFJ|ARPP19|CTDNEP1|H2AFB1|MIS12	202	663|809|729|685|1259|1349|933|465|1001|787|229|349|1287|299|1511|895|839|1423|1495|1163|879|789|1391|1389|931|881|393|615|907|519|625|563|1295|1009|1449|845|497|799|1135|379|1145|367|1027|547|1209|1243|943	2.1e-12		HSA-68886	1.09318e+16	0
739	69	GO Biological Process		Regulation of cellular response to stress	1.38e-09	DVL2|C12orf5|PPP1R15A|MAPK1|ENO1|FXR2|FUS|KRAS|MDM2|THOC1|FLT4|AXIN1|MAP2K2|MAPK3|AKT3|YWHAE|AMBP|TP53|EGFR|PPP4C|APP|FZD1|BAX|WNT1|MAP2K1|MAPK7|MID1|CLU|DVL3|MET|GSK3B|STK25|P4HB|HDAC6|MAPT|FOXM1|CTNNB1|FYN|PPP4R2|FXR1|MTOR|PARK2|PPP1R15B|MB21D1|FMR1|YBX1|RBL1|IGBP1|PPP1R10|STK24|FKBP1B|CHEK2|PDCD10|MST4|BAD|INS|BCL2|VIMP|TF|CHEK1|PRMT1|HRAS|EIF4G1|NCK1|LYN|STK3|H2AFX|AKT1|MYC	202	431|1521|739|809|767|1249|1199|317|523|783|641|1383|821|933|273|1001|1083|865|969|775|361|503|1403|675|409|1429|1503|313|581|637|1177|1523|1533|493|1297|713|989|1509|307|707|593|699|1369|561|951|1099|657|889|539|247|643|283|255|399|1043|1457|749|731|1189|457|473|277|1397|517|1111|1439|1145|1231|391	2.4e-12		GO:0080135	1.08601e+16	0
393	48	GO Biological Process		Response to oxidative stress	1.43e-09	MAPK1|MMP2|PPP2CB|APOE|EIF2S1|PDGFRA|MDM2|PDGFRB|MAPK3|TP53|CCNA2|EGFR|APP|FABP1|CYCS|MAPK7|TPO|HNRNPM|STK25|HDAC6|MAPT|ATP7A|FYN|HP|APOA4|PARK2|PPP1R15B|S100A7|MTF1|SRC|STK24|ANXA1|FKBP1B|PDCD10|G6PD|MST4|BAD|SLC11A2|CDK1|MB|BCL2|VIMP|RELA|HDAC2|ATOX1|CCS|LDHA|AKT1	202	809|781|729|1041|765|509|523|557|933|865|979|969|361|631|873|1429|555|443|1523|493|1297|591|1509|875|463|699|1369|1233|357|815|247|1405|643|255|1045|399|1043|1507|1449|1117|749|731|389|421|269|1165|971|1231	2.5e-12		GO:0006979	1.08447e+16	0
1075	87	GO Biological Process		Cell activation	1.49e-09	UNC13D|MAPK1|CTSG|ALDOC|NFKB1|TTR|EGR1|C3|RAF1|LGALS3|PDGFRA|DNAJC13|MAPK3|RAB7A|SRF|TP53|PFKL|FTH1|EGFR|MYL9|WNT3A|APP|CCT8|KIT|HK3|BAX|WNT1|FABP5|CCT2|IGF1|GUSB|CXCL8|GLB1|F2|GP6|VAMP2|CLU|PRMT5|CXCR2|PKM|F2R|LAMP1|LCK|PLAUR|MAPT|PTPN11|CTNNB1|CTSB|ATP7A|ANXA2|FYN|HP|IGF2R|VCP|TGFBR2|PRSS3|MTOR|S100A7|SNX27|NRAS|PGM1|SRC|IGBP1|ANXA1|FKBP1B|PGM2|PPP3CB|PPP3CA|YWHAZ|INS|BCL2|DDX3X|FKBP1A|AHSG|JMJ…	202	1461|809|1301|1291|437|1303|851|1445|241|1039|509|667|933|633|1223|865|1095|405|969|779|265|361|1261|723|567|1403|675|1105|1075|1473|1051|301|1251|579|571|501|313|941|909|1471|1127|1355|915|329|1297|1285|989|985|591|521|1509|875|483|397|1487|921|593|1233|1227|1451|757|815|889|1405|643|801|1363|1371|1143|1457|749|1499|743|939|351|1157|887|1541|497|701|531|1517|517|1111|467|847|1175	2.62e-11		GO:0001775	1.08268e+16	0
424	50	GO Biological Process		Regulation of lipid metabolic process	1.49e-09	NFKB1|APOC3|APOB|APOA1|EGR1|C3|APOE|PDGFRA|CDK4|PPP2R5A|PDGFRB|RBL2|FGF2|RB1|FLT1|APP|PPARG|KIT|FGFR4|FABP1|FABP5|IRS1|F2|PPARD|MLXIPL|FGFR3|ERBB4|APOA4|MTOR|APOA2|DDX20|SRC|RBL1|FABP3|IRS2|ANXA1|TEK|AKT2|INS|FHL2|CNEP1R1|RXRA|LYN|APOA5|AKT1|CTDNEP1|APOC1|APOC2|H6PD|SMEK2	202	437|429|679|583|851|1445|1041|509|1395|1349|557|1415|1161|787|1387|361|459|723|807|631|1105|453|579|855|683|1323|1151|463|593|639|1093|815|657|1031|1411|1405|1215|877|1457|305|1121|537|1111|689|1231|1209|295|339|1331|1489	2.61e-11		GO:0019216	1.08268e+16	0
379	47	GO Biological Process		Response to oxygen levels	1.52e-09	C12orf5|MMP2|PLAT|EGR1|PIN1|MYOD1|RAF1|CCNB1|CDK4|MDM2|SLC6A4|PDGFRB|DNMT3A|SRF|TP53|CCNA2|PPARG|HK2|PSME3|FABP1|KCNK3|PPARD|PKM|P4HB|ATP6V0A2|PKLR|EIF4EBP1|ATP7A|TGFBR2|MTOR|LMNA|IRAK1|SRC|TEK|SLC29A1|BAD|SLC11A2|MB|BCL2|RHOA|MYOCD|SLC2A1|HDAC2|LDHA|AKT1|MYC|CD24	202	1521|781|529|851|609|1281|241|685|1395|523|843|557|551|1223|865|979|459|727|229|631|1115|855|1471|1533|949|1419|901|591|1487|593|519|945|815|1215|553|1043|1507|1117|749|1157|755|243|421|971|1231|391|1175	2.73e-11		GO:0070482	1.08182e+16	0
5402	270	GO Biological Process		Anatomical structure development	1.58e-09	DVL2|CTTNBP2|PPP2R5B|C12orf5|UNC13D|MAPK1|MICALL1|GNPNAT1|MMP2|CSK|AGO2|TG|MEST|VTN|ALDOC|CCND1|APOB|SNX17|IGFBP5|WDR77|APOA1|EGR1|ATP7B|GOT2|C3|PIN1|STYXL1|YWHAH|MYOD1|RAF1|APOE|LGALS3|KRAS|MBD2|CCNB1|SORT1|PDGFRA|CDK4|MDM2|IGF2BP3|COX17|LRP6|PPP2R3C|SLC6A4|CDH1|PDGFRB|SNX1|FLT4|AXIN1|MAPK3|PAX8|STRN|KDR|TREH|YWHAE|CUL3|FGF2|DNMT3A|PPP2R3A|EGF|VDAC1|SRF|IDE|ERBB3|RB1|NKD1|TP53|ERBB2|CCNA2|RASA1|…	202	431|1137|663|1521|1461|809|813|451|781|1237|1097|1417|829|505|1291|377|679|573|1407|1393|583|851|1309|737|1445|609|711|831|1281|241|1041|1039|317|1113|685|1155|509|1395|523|1101|991|1361|1379|843|271|557|289|641|1383|933|1527|793|371|1203|1001|1481|1161|551|1365|577|967|1223|1485|715|787|867|865|741|979|1035|969|1279|1387|265|361|279|769|459|503|723|1257|693|727|807|1403|675|445|303|1367|973|1105…	2.83e-11		GO:0048856	1.08013e+16	0
57	19	KEGG Pathways		VEGF signaling pathway	1.66e-09	MAPK1|PPP3R1|RAF1|KRAS|MAP2K2|MAPK3|AKT3|KDR|MAP2K1|PLA2G4A|NRAS|SRC|AKT2|BAD|PPP3CB|PPP3CA|HRAS|PRKCA|AKT1	202	809|585|241|317|821|933|273|371|409|1017|1451|815|877|1043|1363|1371|277|497|1231	2.91e-10		hsa04370	1.07799e+16	0
1927	128	GO Biological Process		Positive regulation of nucleobase-containing compound metabolic process	1.68e-09	DVL2|PPP2R5B|C12orf5|MAPK1|AGO2|NFKB1|PFKFB4|PPP3R1|ENO1|WDR77|EGR1|TARDBP|PIN1|YWHAH|MYOD1|RAF1|APOE|FUS|CCNB1|CCT7|LRP6|THOC1|CDH1|PDGFRB|AXIN1|SRCAP|MAP2K2|MAPK3|PAX8|CTCF|FGF2|EGF|SRF|RB1|TP53|ERBB2|CCNA2|EGFR|CCT6A|MTA2|CCT5|WNT3A|APP|CCT8|PPARG|FZD1|FGFR4|BAX|WNT1|LRP5|CCT3|H2AFZ|CCT2|MAP2K1|IGF1|INSR|HLTF|PPARD|MAPK7|PABPC1|DVL3|MET|TCP1|MLXIPL|F2R|FZD2|HFE2|MKL2|ERBB4|FOXM1|CTNNB1|PFKM|NK…	202	431|663|1521|809|1097|437|587|585|767|1393|851|1107|609|831|1281|241|1041|1199|685|1311|1361|783|271|557|1383|499|821|933|1527|957|1161|577|1223|787|865|741|979|969|455|1459|601|265|361|1261|459|503|807|1403|675|445|347|349|1075|409|1473|983|235|855|1429|513|581|637|911|683|1127|817|369|1129|1151|713|989|1089|1003|1005|613|747|397|605|593|699|1319|691|1099|357|651|815|657|1197|1335|1307|539|447|1…	3.03e-11		GO:0045935	1.07747e+16	0
82	23	Reactome Pathways		Oncogenic MAPK signaling	1.68e-09	MAPK1|CSK|RAF1|KRAS|MAP2K2|MAPK3|BRAF|ARAF|MAP2K1|PPP1CC|SND1|FXR1|LMNA|SHOC2|NRAS|YWHAB|SRC|PPP1CB|KSR1|ARRB2|HRAS|ARRB1|MARK3	202	809|1237|241|317|821|933|1257|819|409|881|987|707|519|1325|1451|923|815|1277|1375|887|277|701|953	3.09e-11		HSA-6802957	1.07747e+16	0
147	28	KEGG Pathways		Adrenergic signaling in cardiomyocytes	1.74e-09	PPP2R5B|MAPK1|PPP2CB|PPP1R1A|PPP2R5A|PPP2R3C|MAPK3|AKT3|PPP2R3A|PPP2R1B|PPP2R1A|PPP2R2A|PPP1CA|PPP2R2C|PPP2R5E|PPP1CC|TPM2|PPP2R3B|AKT2|PPP2R2B|PPP1CB|BCL2|PPP2R2D|PRKCA|PPP2R5C|PPP2R5D|PPP2CA|AKT1	202	663|809|729|1399|1349|1379|933|273|1365|1495|1163|879|837|325|1389|881|1345|1475|877|859|1277|749|845|497|799|1135|379|1231	3.11e-10		hsa04261	107594507517174	0
23	15	GO Biological Process		Glucose 6-phosphate metabolic process	1.8e-10	GCK|G6PC|G6PC3|HK2|HK3|TALDO1|HKDC1|G6PC2|PGM2|G6PD|TKT|HK1|GPI|DERA|H6PD	202	871|475|1245|727|567|1483|993|897|801|1045|1007|1219|1541|1517|1331	3.27e-11		GO:0051156	1.07447e+16	0
65	21	Reactome Pathways		Costimulation by the CD28 family	1.81e-09	PPP2R5B|CSK|PPP2CB|PPP2R5A|AKT3|PPP2R1B|PPP2R1A|PPP2R5E|LCK|PTPN11|FYN|MTOR|SRC|AKT2|GRB2|PPP2R5C|PPP2R5D|PPP2CA|LYN|AKT1|YES1	202	663|1237|729|1349|273|1495|1163|1389|915|1285|1509|593|815|877|1271|799|1135|379|1111|1231|1269	3.42e-11		HSA-388841	1.07423e+16	0
1025	84	Reactome Pathways		Innate Immune System	1.98e-09	UNC13D|MAPK1|CTSG|PPP2CB|VTN|ALDOC|NFKB1|SKP1|APOB|PPP3R1|TTR|C3|PIN1|RAF1|LGALS3|KRAS|DNAJC13|MAPK3|RAB7A|PFKL|FTH1|APP|CCT8|HK3|PSME3|FABP5|CCT2|MAP2K1|GUSB|GLB1|F2|MAPK7|PPP2R1B|CLU|EEA1|CXCR2|PKM|TRIM25|PPP2R1A|CUL1|ATP6V0A2|LAMP1|LCK|PLAUR|PTPN11|CTNNB1|CTSB|ATP7A|ANXA2|FYN|HP|IGF2R|VCP|PRSS3|S100A7|FCGR1A|SIKE1|NRAS|IRAK1|MB21D1|PGM1|SRC|DDX58|PGM2|GRB2|PPP3CB|PPP3CA|BCL2|DDX3X|RELA|AHSG|RH…	202	1461|809|1301|729|505|1291|437|1195|679|585|1303|1445|609|241|1039|317|667|933|633|1095|405|361|1261|567|229|1105|1075|409|1051|1251|579|1429|1495|313|1315|909|1471|1057|1163|925|949|1355|915|329|1285|989|985|591|521|1509|875|483|397|921|1233|407|1465|1451|945|561|757|815|1053|801|1271|1363|1371|749|1499|389|939|1157|803|1541|277|531|1517|517|1135|379|1111|269|1269|847	3.82e-11		HSA-168249	1.07033e+16	0
1956	129	Reactome Pathways		Immune System	1.98e-09	PPP2R5B|UNC13D|MAPK1|CTSG|MMP2|CSK|PPP2CB|VTN|ALDOC|NFKB1|CCND1|SKP1|APOB|PPP3R1|TTR|EGR1|C3|PIN1|RAF1|LGALS3|KRAS|DNAJC13|LMNB1|PPP2R5A|CDH1|MAPK3|AKT3|CUL3|FGF2|RAB7A|TP53|PFKL|FTH1|APP|CCT8|HK3|PSME3|EIF4A1|ABCE1|HSPA9|FABP5|CCT2|MAP2K1|GUSB|IRS1|CXCL8|GLB1|F2|MAPK7|PPP2R1B|MID1|VAMP2|CLU|TCP1|RBBP6|EEA1|CXCR2|PKM|TALDO1|MMP1|UBE2O|TRIM25|PPP2R1A|CUL1|P4HB|ATP6V0A2|LAMP1|PPP2R5E|LCK|PLAUR|PTPN…	202	663|1461|809|1301|781|1237|729|505|1291|437|377|1195|679|585|1303|851|1445|609|241|1039|317|667|1259|1349|271|933|273|1481|1161|633|865|1095|405|361|1261|567|229|1037|1469|973|1105|1075|409|1051|453|301|1251|579|1429|1495|1503|501|313|911|471|1315|909|1471|1483|997|1531|1057|1163|925|1533|949|1355|1389|915|329|1285|989|985|591|521|1509|875|483|397|921|593|615|699|1233|407|1465|1451|945|561|757|62…	3.87e-11		HSA-168256	1.07033e+16	0
676	65	GO Biological Process		Regulation of growth	2.05e-09	MAPK1|IGFBP2|IGFBP5|ENO1|PIN1|MYOD1|APOE|CCNB1|CDK4|SLC6A4|FGF2|PPP2R3A|SRF|RB1|NKD1|TP53|ERBB2|IGFBP4|EGFR|IGFBP1|WNT3A|APP|PPARG|IGF1|INSR|F2|PPARD|PPP2R1A|GSK3B|FGFR3|MAPT|SFN|ERBB4|FOXM1|TGFBR2|MTOR|FGFR1OP|PARK2|PAPPA2|AR|RBBP7|IGFBP3|G6PD|GPC3|CDK1|ULK2|INS|BCL2|DDX3X|TKT|IGF2|FGFR1|SMARCA4|RHOA|SHC1|MYOCD|FBP1|FGFR2|SERPINE2|EIF4G1|PPP2CA|STK3|AKT1|PPP1R9B|CTDP1	202	809|1427|1407|767|609|1281|1041|685|1395|843|1161|1365|1223|787|867|865|741|335|969|1279|265|361|459|1473|983|579|855|1163|1177|1323|1297|439|1151|713|1487|593|907|699|1179|1197|929|1229|1045|287|1449|913|1457|749|1499|1007|401|1123|635|1157|803|755|647|977|1141|1397|379|1439|1231|385|1063	3.73e-11		GO:0040008	1.06882e+16	0
368	46	GO Biological Process		Positive regulation of establishment of protein localization	2.09e-09	MAPK1|NUTF2|GCK|PPP3R1|TARDBP|YWHAH|CCT7|MDM2|IPO5|CDH1|YWHAE|TP53|ERBB2|EGFR|CCT6A|CCT5|APP|CCT8|CCT3|VPS35|CCT2|IGF1|YWHAG|PPARD|VAMP2|TCP1|GSK3B|SFN|FYN|PFKFB2|YWHAB|SRC|IRS2|YWHAQ|AKT2|PDCD10|CCT4|BAD|PPP3CB|CDK1|YWHAZ|INS|BCL2|GPI|HRAS|ARRB1	202	809|629|871|585|1107|831|1311|523|461|271|1001|865|741|969|455|601|361|1261|347|1021|1075|1473|895|855|501|911|1177|439|1509|1319|923|815|1411|833|877|255|259|1043|1363|1449|1143|1457|749|1541|277|701	3.83e-11		GO:1904951	1.06799e+16	0
642	63	GO Biological Process		Regulation of establishment of protein localization	2.11e-09	MAPK1|NUTF2|CSK|GCK|PPP3R1|TARDBP|YWHAH|APOE|CCT7|MDM2|IPO5|CDH1|YWHAE|TP53|ERBB2|PFKL|EGFR|CCT6A|CCT5|APP|CCT8|LRP5|CCT3|VPS35|CCT2|IGF1|IRS1|YWHAG|PPARD|VAMP2|TCP1|F2R|GSK3B|HDAC6|MAPT|PTPN11|SFN|ENSA|FYN|PARK2|PFKFB2|YWHAB|SRC|G6PC2|IRS2|FKBP1B|YWHAQ|AKT2|PDCD10|CCT4|BAD|PPP3CB|PPP3CA|CDK1|YWHAZ|INS|BCL2|GPI|HRAS|PRKCA|ARRB1|SLC2A1|LYN	202	809|629|1237|871|585|1107|831|1041|1311|523|461|271|1001|865|741|1095|969|455|601|361|1261|445|347|1021|1075|1473|453|895|855|501|911|1127|1177|493|1297|1285|439|355|1509|699|1319|923|815|897|1411|643|833|877|255|259|1043|1363|1371|1449|1143|1457|749|1541|277|497|701|243|1111	3.88e-11		GO:0070201	1.06757e+16	0
134	28	Reactome Pathways		Signaling by NTRKs	2.17e-09	MAPK1|PPP2CB|EGR1|KRAS|MAP2K2|MAPK3|SRF|BRAF|BAX|MAP2K1|IRS1|MAPK7|PPP2R1B|PPP2R1A|PTPN11|FYN|CHD4|NRAS|YWHAB|SRC|IRS2|GRB2|RHOA|SHC1|HRAS|PPP2R5D|PPP2CA|NTRK1	202	809|729|851|317|821|933|1223|1257|1403|409|453|1429|1495|1163|1285|1509|1351|1451|923|815|1411|1271|1157|803|277|1135|379|467	4.39e-11		HSA-166520	1066354026615147	0
36	17	Reactome Pathways		Signaling by high-kinase activity BRAF mutants	2.24e-09	MAPK1|CSK|RAF1|KRAS|MAP2K2|MAPK3|BRAF|ARAF|MAP2K1|NRAS|YWHAB|SRC|KSR1|ARRB2|HRAS|ARRB1|MARK3	202	809|1237|241|317|821|933|1257|819|409|1451|923|815|1375|887|277|701|953	4.64e-11		HSA-6802948	1.06498e+16	0
157	30	GO Biological Process		Regeneration	2.6e-10	VTN|CCND1|APOA1|MYOD1|CCNB1|CDK4|CCNA2|EGFR|IGFBP1|PPARG|WNT1|IGF1|CTNNA1|PLG|PRMT5|PKM|ENO3|ULK1|ERBB4|IGF2R|TGFBR2|APOA2|PFKFB1|ANXA1|PPP3CA|CDK1|BCL2|HFE|NNMT|APOA5	202	505|377|583|1281|685|1395|979|969|1279|459|675|1473|545|281|941|1471|1263|1433|1151|483|1487|639|1335|1405|1371|1449|749|1329|1321|689	4.82e-11		GO:0031099	1.0585e+16	0
59	19	KEGG Pathways		Long-term depression	2.65e-09	MAPK1|PPP2CB|RAF1|KRAS|MAP2K2|MAPK3|BRAF|ARAF|MAP2K1|IGF1|PPP2R1B|PPP2R1A|PPP1R17|PLA2G4A|NRAS|HRAS|PRKCA|PPP2CA|LYN	202	809|729|241|317|821|933|1257|819|409|1473|1495|1163|717|1017|1451|277|497|379|1111	4.81e-10		hsa04730	1.05768e+16	0
187	31	KEGG Pathways		Kaposi sarcoma-associated herpesvirus infection	2.83e-09	MAPK1|NFKB1|CCND1|PPP3R1|C3|RAF1|KRAS|CDK4|MAP2K2|MAPK3|AKT3|FGF2|RB1|TP53|BAX|MAP2K1|CXCL8|CYCS|GSK3B|CTNNB1|MTOR|NRAS|SRC|AKT2|PPP3CB|PPP3CA|RELA|HRAS|LYN|AKT1|MYC	202	809|437|377|585|1445|241|317|1395|821|933|273|1161|787|865|1403|409|301|873|1177|989|593|1451|815|877|1363|1371|389|277|1111|1231|391	5.23e-10		hsa05167	1054821356447571	0
30	16	GO Biological Process		Plasma lipoprotein particle remodeling	2.9e-10	CETP|APOC3|APOB|APOA1|APOE|LCAT|PLA2G7|ALB|LPA|APOA4|APOA2|APOM|PLTP|APOA5|APOC1|APOC2	202	655|429|679|583|1041|963|1283|515|999|463|639|1015|293|689|295|339	5.39e-11		GO:0034369	1.05376e+16	0
1770	120	GO Biological Process		Positive regulation of multicellular organismal process	2.92e-09	DVL2|PPP2R5B|APOH|MAPK1|AGO2|NFKB1|CCND1|ENO1|EGR1|C3|PIN1|STYXL1|MYOD1|SNX4|APOE|CCNB1|PPP2R3C|PDGFRB|FLT4|MAPK3|PAX8|AKT3|KDR|FGF2|EGF|SRF|ERBB3|RB1|EGFR|FLT1|WNT3A|APP|PPARG|FZD1|KIT|HK2|BAX|WNT1|LRP5|PRKCI|FABP5|MAP2K1|IGF1|CXCL8|F2|PLG|CLU|DVL3|MET|KIAA0196|PRMT5|CXCR2|PKM|F2R|STK25|CALCA|HDAC6|MKL2|CAPRIN1|MAPT|PTPN11|PPP1CC|ERBB4|CTNNB1|ANXA2|FYN|TGFBR2|TFRC|MTOR|PARK2|PLA2G4A|APOA2|IRAK1|…	202	431|663|239|809|1097|437|377|767|851|1445|609|711|1281|433|1041|685|1379|557|641|933|1527|273|371|1161|577|1223|715|787|969|1387|265|361|459|503|723|727|1403|675|445|303|1105|409|1473|301|579|281|313|581|637|1181|941|909|1471|1127|1523|849|493|1129|883|1297|1285|881|1151|989|521|1509|1487|605|593|699|1017|639|945|561|951|625|651|815|1197|1405|447|415|1211|1053|1215|643|1043|1371|1449|1457|749|149…	5.48e-11		GO:0051240	1.05346e+16	0
3982	214	GO Biological Process		Regulation of nucleobase-containing compound metabolic process	3.02e-09	DVL2|PPP2R5B|C12orf5|MAPK1|PAPOLA|AGO2|GCK|NFKB1|CCND1|PFKFB4|PPP3R1|ENO1|WDR77|EGR1|TARDBP|HIST1H4F|PIN1|YWHAH|MYOD1|FXR2|RAF1|APOE|FUS|CCNA1|KRAS|MBD2|CCNB1|CCT7|MDM2|IGF2BP3|LRP6|THOC1|CDH1|PDGFRB|RBL2|AXIN1|SRCAP|MAP2K2|MAPK3|SMG6|PAX8|CTCF|CUL3|FGF2|DNMT3A|EGF|SRF|RB1|TP53|ERBB2|CCNA2|RASA1|EGFR|CCT6A|MTA2|PPP4C|CCT5|WNT3A|APP|CCT8|PPARG|FZD1|KIT|IGF2BP1|SSU72|FGFR4|BAX|PSME3|WNT1|LRP5|CCT3|…	202	431|663|1521|809|1513|1097|871|437|377|587|585|767|1393|851|1107|1131|609|831|1281|1249|241|1041|1199|671|317|1113|685|1311|523|1101|1361|783|271|557|1415|1383|499|821|933|1085|1527|957|1481|1161|551|577|1223|787|865|741|979|1035|969|455|1459|775|601|265|361|1261|459|503|723|693|395|807|1403|229|675|445|347|303|349|1469|1103|1287|1075|299|409|1473|983|387|1191|839|235|855|1429|513|313|581|285|637…	5.69e-11		GO:0019219	1051999305704285	0
170	31	GO Biological Process		Positive regulation of protein kinase B signaling	3.07e-09	IGFBP5|PDGFRA|PDGFRB|FGF2|EGF|ERBB3|ERBB2|EGFR|APP|KIT|FGFR4|INSR|IRS1|MET|LCK|FGFR3|PTPN11|ERBB4|FYN|MTOR|SRC|IRS2|SPRY2|TEK|GRB2|INS|IGF2|FGFR1|ARRB2|FGFR2|STK3	202	1407|509|557|1161|577|715|741|969|361|723|807|983|453|637|915|1323|1285|1151|1509|593|815|1411|1253|1215|1271|1457|401|1123|887|977|1439	5.82e-11		GO:0051897	1.05129e+16	0
51	19	GO Biological Process		Protein-lipid complex subunit organization	3.07e-09	CETP|APOC3|APOB|APOA1|APOE|LCAT|PLA2G7|ALB|LPA|P4HB|APOA4|APOA2|APOM|SNX9|PLTP|APOA5|APOC1|APOC2|APOC4	202	655|429|679|583|1041|963|1283|515|999|1533|463|639|1015|1373|293|689|295|339|649	5.8e-12		GO:0071825	1.05129e+16	0
241	35	KEGG Pathways		Endocytosis	3.42e-09	SNX4|PDGFRA|MDM2|SNX1|RAB7A|RAB5A|EGFR|VPS26B|FGFR4|PRKCI|VPS35|SNX32|EEA1|KIAA0196|CXCR2|HGS|FGFR3|AMPH|IGF2R|TGFBR2|TFRC|SNX6|VPS26A|SRC|SNX5|PRKCZ|SNX2|RHOA|ARRB2|HRAS|ARRB1|FGFR2|RABEP1|EHD1|VPS29	202	433|509|523|289|633|1023|969|1385|807|303|1021|565|1315|1181|909|559|1323|1525|483|1487|605|1061|319|815|447|415|533|1157|887|277|701|977|791|1081|253	6.41e-10		hsa04144	1.0466e+16	0
616	61	GO Biological Process		Mitotic cell cycle process	3.45e-09	RPS6KB1|CCND1|SKP1|CCNA1|CCNB1|CDK4|MDM2|RBL2|SGOL1|YWHAE|CUL3|RB1|TP53|CCNA2|RASA1|RHOC|BAX|PLK1|BUB1|YWHAG|BANF1|PPP2R1A|PPP2R2A|CUL1|EIF4EBP1|SFN|ENSA|FOXM1|CCNG1|ANKLE2|MAX|VCP|DCTN1|FGFR1OP|LMNA|CDC20|MASTL|SPRY2|CHEK2|SNX9|PPP3CA|CDK1|PPP1CB|PPME1|LCMT1|PPP1R12A|PPP2R2D|RHOA|CNEP1R1|PRMT1|HRAS|PRKCA|PPP2R5C|PPP2CA|EIF4E|CDC27|ARPP19|CTDNEP1|MYC|CTDP1|MIS12	202	337|377|1195|671|685|1395|523|1415|465|1001|1481|787|865|979|1035|279|1403|299|1511|895|1423|1163|879|925|901|439|355|713|569|393|747|397|615|907|519|625|1295|1253|283|1373|1371|1449|1277|1079|797|1055|845|1157|1121|473|277|497|799|379|1201|367|547|1209|391|1063|943	6.57e-11		GO:1903047	1.04622e+16	0
69	20	KEGG Pathways		Prolactin signaling pathway	3.47e-09	MAPK1|GCK|NFKB1|CCND1|RAF1|KRAS|MAP2K2|MAPK3|AKT3|MAP2K1|GSK3B|NRAS|SRC|AKT2|GRB2|INS|RELA|SHC1|HRAS|AKT1	202	809|871|437|377|241|317|821|933|273|409|1177|1451|815|877|1271|1457|389|803|277|1231	6.61e-10		hsa04917	1.04597e+16	0
87	23	Reactome Pathways		Signaling by FGFR	4.14e-09	MAPK1|PPP2CB|KRAS|MAPK3|FGF2|BRAF|FGFR4|PPP2R1A|HNRNPM|FGFR3|PTPN11|TIAL1|NRAS|MKNK1|SRC|SPRY2|GRB2|FGFR1|SHC1|TIA1|HRAS|FGFR2|PPP2CA	202	809|729|317|933|1161|1257|807|1163|443|1323|1285|237|1451|249|815|1253|1271|1123|803|1235|277|977|379	8.78e-11		HSA-190236	103829996588791	0
45	18	Reactome Pathways		ERCC6 (CSB) and EHMT2 (G9a) positively regulate rRNA expression	4.15e-09	MTA2|H2AFZ|H2AFV|HIST1H2AJ|HIST2H2AC|HIST1H2AD|CHD4|GATAD2A|GATAD2B|RBBP4|HDAC1|HIST1H2AC|RBBP7|CHD3|HDAC2|H2AFX|H2AFJ|H2AFB1	202	1459|349|839|789|1391|931|1351|617|1019|267|651|1009|929|1337|421|1145|1027|1243	8.97e-11		HSA-427389	1.0382e+16	0
78	22	Reactome Pathways		Constitutive Signaling by Aberrant PI3K in Cancer	4.18e-09	PDGFRA|PDGFRB|STRN|FGF2|EGF|ERBB3|ERBB2|EGFR|KIT|FGFR4|IRS1|MET|LCK|FGFR3|PTPN11|ERBB4|FYN|SRC|IRS2|GRB2|FGFR1|FGFR2	202	509|557|793|1161|577|715|741|969|723|807|453|637|915|1323|1285|1151|1509|815|1411|1271|1123|977	9.24e-11		HSA-2219530	1.03788e+16	0
154	28	KEGG Pathways		Wnt signaling pathway	4.27e-09	DVL2|CCND1|SKP1|PPP3R1|LRP6|AXIN1|NKD1|TP53|WNT3A|FZD1|WNT1|LRP5|PPARD|DVL3|FZD2|GSK3B|CUL1|WNT8B|CTNNB1|FRAT2|FRAT1|DVL1|PPP3CB|PPP3CA|RHOA|PRKCA|WNT8A|MYC	202	431|377|1195|585|1361|1383|867|865|265|503|675|445|855|581|817|1177|925|245|989|311|321|1211|1363|1371|1157|497|1207|391	8.25e-10		hsa04310	1.03696e+16	0
15	13	Reactome Pathways		Activation of BAD and translocation to mitochondria	4.39e-09	PPP3R1|YWHAH|AKT3|YWHAE|YWHAG|SFN|YWHAB|YWHAQ|AKT2|BAD|YWHAZ|BCL2|AKT1	202	585|831|273|1001|895|439|923|833|877|1043|1143|749|1231	9.91e-11		HSA-111447	1.03575e+16	0
15	13	Reactome Pathways		Signaling by GSK3beta mutants	4.39e-09	PPP2R5B|PPP2CB|PPP2R5A|AXIN1|PPP2R1B|PPP2R1A|GSK3B|PPP2R5E|CTNNB1|PPP2R5C|PPP2R5D|PPP2CA|CSNK1A1	202	663|729|1349|1383|1495|1163|1177|1389|989|799|1135|379|745	9.91e-11		HSA-5339716	1.03575e+16	0
15	13	Reactome Pathways		S33 mutants of beta-catenin arent phosphorylated	4.39e-09	PPP2R5B|PPP2CB|PPP2R5A|AXIN1|PPP2R1B|PPP2R1A|GSK3B|PPP2R5E|CTNNB1|PPP2R5C|PPP2R5D|PPP2CA|CSNK1A1	202	663|729|1349|1383|1495|1163|1177|1389|989|799|1135|379|745	9.91e-11		HSA-5358747	1.03575e+16	0
15	13	Reactome Pathways		S37 mutants of beta-catenin arent phosphorylated	4.39e-09	PPP2R5B|PPP2CB|PPP2R5A|AXIN1|PPP2R1B|PPP2R1A|GSK3B|PPP2R5E|CTNNB1|PPP2R5C|PPP2R5D|PPP2CA|CSNK1A1	202	663|729|1349|1383|1495|1163|1177|1389|989|799|1135|379|745	9.91e-11		HSA-5358749	1.03575e+16	0
15	13	Reactome Pathways		S45 mutants of beta-catenin arent phosphorylated	4.39e-09	PPP2R5B|PPP2CB|PPP2R5A|AXIN1|PPP2R1B|PPP2R1A|GSK3B|PPP2R5E|CTNNB1|PPP2R5C|PPP2R5D|PPP2CA|CSNK1A1	202	663|729|1349|1383|1495|1163|1177|1389|989|799|1135|379|745	9.91e-11		HSA-5358751	1.03575e+16	0
15	13	Reactome Pathways		T41 mutants of beta-catenin arent phosphorylated	4.39e-09	PPP2R5B|PPP2CB|PPP2R5A|AXIN1|PPP2R1B|PPP2R1A|GSK3B|PPP2R5E|CTNNB1|PPP2R5C|PPP2R5D|PPP2CA|CSNK1A1	202	663|729|1349|1383|1495|1163|1177|1389|989|799|1135|379|745	9.91e-11		HSA-5358752	1.03575e+16	0
69	21	GO Biological Process		Pyruvate metabolic process	4.61e-09	GCK|ALDOC|ENO1|VDAC1|PFKL|HK2|HK3|ADPGK|PKM|ENO3|PKLR|PFKM|HKDC1|PFKFB2|PGM1|PFKFB1|PFKP|HK1|GPI|ENO2|LDHA	202	871|1291|767|967|1095|727|567|1273|1471|1263|1419|1089|993|1319|757|1335|1535|1219|1541|1109|971	8.94e-11		GO:0006090	1.03363e+16	0
45	18	GO Biological Process		Regulation of polysaccharide metabolic process	4.61e-09	GCK|NFKB1|KHK|EGF|PPP1R3A|IGF1|INSR|IRS1|GSK3B|PPP1CA|MTOR|IRS2|AKT2|PPP1CB|INS|VIMP|IGF2|AKT1	202	871|437|425|577|777|1473|983|453|1177|837|593|1411|877|1277|1457|731|401|1231	8.97e-11		GO:0032881	1.03363e+16	0
348	44	GO Biological Process		Positive regulation of protein serine/threonine kinase activity	4.61e-09	DVL2|MAPK1|CSK|CCND1|RAF1|KRAS|CCNB1|PDGFRB|MAP2K2|MAPK3|FGF2|EGF|ERBB2|EGFR|FLT1|APP|KIT|BRAF|IGFBP6|MAP2K1|IGF1|INSR|DVL3|F2R|PTPN11|IRAK1|SRC|SPRY2|PDCD10|CDK1|KSR1|DDX3X|TF|IGF2|FGFR1|RHOA|SHC1|HRAS|ARRB1|PPP2CA|STK3|NTRK1|AKT1|CD24	202	431|809|1237|377|241|317|685|557|821|933|1161|577|741|969|1387|361|723|1257|1293|409|1473|983|581|1127|1285|945|815|1253|255|1449|1375|1499|1189|401|1123|1157|803|277|701|379|1439|467|1231|1175	8.89e-11		GO:0071902	1.03363e+16	0
456	51	GO Biological Process		Regulation of cellular amide metabolic process	4.8e-10	C12orf5|PPP1R15A|MAPK1|AGO2|RPS6KB1|IGFBP5|TARDBP|PIN1|FXR2|APOE|EIF2S1|CDK4|IGF2BP3|MAPK3|TP53|ERBB2|APP|GEMIN5|IGF2BP1|EIF4A1|IGF1|RPS6KB2|PABPC1|CLU|PPP1CA|CAPRIN1|EIF4EBP1|FXR1|EIF3B|MTOR|PPP1R15B|YTHDF1|FMR1|MKNK1|YBX1|ATXN2|AKT2|LARP4|DDX3X|RELA|ELAVL1|RHOA|TIA1|EIF4G1|NCK1|RXRA|EIF4E|LSM14A|DIO2|AKT1|UPF1	202	1521|739|809|1097|337|1407|1107|609|1249|1041|765|1395|1101|933|865|741|361|495|693|1037|1473|619|513|313|837|883|901|707|1065|593|1369|691|951|249|1099|359|877|1167|1499|389|413|1157|1235|1397|517|537|1201|927|1159|1231|959	9.38e-11		GO:0034248	1.03188e+16	0
969	80	GO Biological Process		Regulation of locomotion	5.33e-09	APOH|MAPK1|AGO2|VTN|IGFBP5|PIN1|RAF1|APOE|LGALS3|PDGFRA|MDM2|CDH1|PDGFRB|FLT4|MAPK3|AKT3|KDR|FGF2|PPP2R3A|EGF|SRF|ERBB3|NKD1|ERBB2|PLA2G7|EGFR|MTA2|FLT1|WNT3A|APP|RHOC|PPARG|KIT|VPS35|IGF1|INSR|CTNNA1|CXCL8|PLG|PPARD|MET|CXCR2|F2R|HDAC6|ERBB4|ATP7A|NKX2-1|PTRF|TGFBR2|MTOR|FGFR1OP|LMNA|S100A7|YTHDF1|SRC|IRS2|STK24|ANXA1|SPRY2|DDX58|TEK|IGFBP3|AKT2|PDCD10|MST4|PPP3CA|INS|BCL2|TF|FGFR1|RHOA|MYOCD|GP…	202	239|809|1097|505|1407|609|241|1041|1039|509|523|271|557|641|933|273|371|1161|1365|577|1223|715|867|741|1283|969|1459|1387|265|361|279|459|723|1021|1473|983|545|301|281|855|637|909|1127|493|1151|591|1003|525|1487|593|907|519|1233|691|815|1411|247|1405|1253|1053|1215|1229|877|255|399|1371|1457|749|1189|1123|1157|755|1541|277|497|1141|517|1111|1231|847	1.04e-10		GO:0040012	1.02733e+16	0
676	64	GO Biological Process		Regulation of mitotic cell cycle	5.48e-09	RPS6KB1|CCND1|SKP1|PIN1|CCNB1|CDK4|MDM2|PDGFRB|RBL2|MAP2K2|YWHAE|CUL3|EGF|RB1|TP53|EGFR|APP|BAX|PSME3|LRP5|RAD21|PLK1|MAP2K1|BUB1|IGF1|INSR|YWHAG|PRMT5|PPP2R1A|STK25|CUL1|EIF4EBP1|PTPN11|SFN|CTNNB1|DCTN1|FGFR1OP|CDC20|RBL1|PPP1R10|STK24|ANXA1|CHEK2|MST4|CDK1|INS|BCL2|LCMT1|DDX3X|CHEK1|IGF2|FGFR1|FBXO43|PRMT1|HRAS|PRKCA|PPP2R5C|CDKN1C|EIF4G1|EIF4E|STK3|CDC27|AKT1|PPP1R9B	202	337|377|1195|609|685|1395|523|557|1415|821|1001|1481|577|787|865|969|361|1403|229|445|1287|299|409|1511|1473|983|895|941|1163|1523|925|901|1285|439|989|615|907|625|657|539|247|1405|283|399|1449|1457|749|797|1499|457|401|1123|1453|473|277|497|799|665|1397|1201|1439|367|1231|385	1.08e-10		GO:0007346	1.02612e+16	0
175	31	GO Biological Process		Positive regulation of binding	5.76e-09	PPP2CB|PON1|VTN|PIN1|APOE|EIF2S1|MBD2|DERL1|EGF|IDE|RB1|WNT3A|APP|PPARG|IGF1|MET|GSK3B|PLAUR|CTNNB1|ANXA2|PARK2|S100A10|FMR1|FKBP1A|MYOCD|ARRB1|MARK3|EIF4G1|HFE|PPP2CA|STK3	202	729|841|505|609|1041|765|1113|861|577|1485|787|265|361|459|1473|637|1177|329|989|521|699|697|951|743|755|701|953|1397|1329|379|1439	1.14e-10		GO:0051099	1.02396e+16	0
2325	144	GO Biological Process		Cell surface receptor signaling pathway	5.8e-10	DVL2|MAPK1|MMP2|CSK|AGO2|PLAT|NFKB1|CCND1|SKP1|PPP3R1|APOA1|EGR1|C3|RAF1|KRAS|SORT1|PDGFRA|LRP6|LMNB1|PDGFRB|FLT4|AXIN1|MAPK3|STRN|KDR|CUL3|FGF2|PPP2R3A|EGF|IDE|ERBB3|NKD1|TP53|ERBB2|RAB5A|RASA1|EGFR|IGFBP1|FLT1|WNT3A|APP|FZD1|KIT|BRAF|FGFR4|BAX|PSME3|WNT1|LRP5|IFT122|HSPA9|VPS35|IGF1|INSR|IRS1|CXCL8|F2|GP6|MID1|DVL3|MET|TCP1|CXCR2|TALDO1|MMP1|TRIM25|FZD2|GSK3B|HNRNPM|PPP1CA|CUL1|P4HB|ATP6V0A2|HF…	202	431|809|781|1237|1097|529|437|377|1195|585|583|851|1445|241|317|1155|509|1361|1259|557|641|1383|933|793|371|1481|1161|1365|577|1485|715|867|865|741|1023|1035|969|1279|1387|265|361|503|723|1257|807|1403|229|675|445|1367|973|1021|1473|983|453|301|579|571|1503|581|637|911|909|1483|997|1057|817|1177|443|837|925|1533|949|369|915|329|1323|245|901|1285|1151|989|521|1509|441|483|1487|237|407|1325|1451|94…	1.15e-10		GO:0007166	1.02366e+16	0
3197	181	GO Biological Process		Animal organ development	6.05e-09	DVL2|CTTNBP2|MAPK1|GNPNAT1|MMP2|CSK|TG|VTN|CCND1|SNX17|IGFBP5|WDR77|APOA1|EGR1|ATP7B|GOT2|YWHAH|MYOD1|RAF1|KRAS|MBD2|CCNB1|PDGFRA|CDK4|MDM2|COX17|LRP6|PPP2R3C|SLC6A4|CDH1|PDGFRB|FLT4|MAPK3|PAX8|KDR|TREH|YWHAE|CUL3|FGF2|PPP2R3A|EGF|SRF|ERBB3|RB1|NKD1|TP53|ERBB2|CCNA2|EGFR|FLT1|WNT3A|APP|AKR1B1|PPARG|FZD1|KIT|BRAF|IGF2BP1|HK2|BAX|WNT1|LRP5|PRKCI|IFT122|HSPA9|MAP2K1|IGF1|INSR|COPRS|CTNNA1|KCNK3|CXCL…	202	431|1137|809|451|781|1237|1417|505|377|573|1407|1393|583|851|1309|737|831|1281|241|317|1113|685|509|1395|523|991|1361|1379|843|271|557|641|933|1527|371|1203|1001|1481|1161|1365|577|1223|715|787|867|865|741|979|969|1387|265|361|769|459|503|723|1257|693|727|1403|675|445|303|1367|973|409|1473|983|323|545|1115|301|281|855|637|471|555|941|909|1471|817|1177|837|925|915|1129|1323|901|1285|439|1151|989|9…	1.21e-10		GO:0048513	1021824462534753	0
101	23	KEGG Pathways		T cell receptor signaling pathway	6.17e-09	MAPK1|NFKB1|PPP3R1|RAF1|KRAS|CDK4|MAP2K2|MAPK3|AKT3|MAP2K1|GSK3B|LCK|FYN|NRAS|AKT2|GRB2|PPP3CB|PPP3CA|RELA|RHOA|HRAS|NCK1|AKT1	202	809|437|585|241|317|1395|821|933|273|409|1177|915|1509|1451|877|1271|1363|1371|389|1157|277|517|1231	1.21e-09		hsa04660	1.02097e+16	0
226	35	GO Biological Process		Regulation of protein kinase B signaling	6.27e-09	PPP2R5B|IGFBP5|PDGFRA|PDGFRB|FGF2|EGF|ERBB3|ERBB2|EGFR|APP|KIT|FGFR4|INSR|IRS1|MET|LCK|FGFR3|PTPN11|ERBB4|FYN|MTOR|SRC|IRS2|SPRY2|TEK|GRB2|INS|IGF2|FGFR1|ARRB2|FGFR2|PPP2R5C|STK3|NTRK1|AKT1	202	663|1407|509|557|1161|577|715|741|969|361|723|807|983|453|637|915|1323|1285|1151|1509|593|815|1411|1253|1215|1271|1457|401|1123|887|977|799|1439|467|1231	1.25e-10		GO:0051896	1.02027e+16	0
367	45	GO Biological Process		Response to metal ion	6.32e-09	C12orf5|MAPK1|PPP2CB|CCND1|IGFBP2|ATP7B|FUS|EIF2S1|CCNB1|CDK4|MDM2|KHK|CDH1|SLC30A4|MAPK3|DNMT3A|SORD|EGFR|APP|KIT|BRAF|KCNK3|PPP1CA|PKLR|MAPT|ATP7A|TRPV6|ACTA1|PARK2|ANXA7|MTF1|FECH|G6PD|BAD|PPP3CA|SLC11A2|CDK1|BCL2|TF|FBP1|HFE|PPP2CA|TFR2|AKT1|CPNE3	202	1521|809|729|377|1427|1309|1199|765|685|1395|523|425|271|375|933|551|1543|969|361|723|1257|1115|837|1419|1297|591|695|603|699|365|357|677|1045|1043|1371|1507|1449|749|1189|647|1329|379|435|1231|847	1.27e-10		GO:0010038	1.01993e+16	0
39	17	GO Biological Process		Regulation of polysaccharide biosynthetic process	6.36e-09	GCK|NFKB1|EGF|PPP1R3A|IGF1|INSR|IRS1|GSK3B|PPP1CA|MTOR|IRS2|AKT2|PPP1CB|INS|VIMP|IGF2|AKT1	202	871|437|577|777|1473|983|453|1177|837|593|1411|877|1277|1457|731|401|1231	1.29e-10		GO:0032885	1.01965e+16	0
62	20	GO Biological Process		Negative regulation of protein dephosphorylation	6.36e-09	PPP1R15A|STYXL1|PPP1R1B|LGALS3|PPP1R1A|YWHAE|PPP4R4|GSK3B|PPP1R17|ENSA|TIPRL|SET|YWHAB|MASTL|PPP1R10|FKBP1B|PPME1|FKBP1A|ARPP19|PPP1R9B	202	739|711|751|1039|1399|1001|1491|1177|717|355|811|563|923|1295|539|643|1079|743|547|385	1.28e-10		GO:0035308	1.01965e+16	0
99	24	GO Biological Process		Regulation of lipase activity	6.77e-09	APOH|APOC3|APOA1|SORT1|PDGFRA|PDGFRB|FGF2|EGFR|FLT1|RHOC|KIT|FGFR3|APOA4|APOA2|ANXA1|PRKCZ|FGFR1|RHOA|HRAS|FGFR2|APOA5|APOC1|APOC2|ANXA8	202	239|429|583|1155|509|557|1161|969|1387|279|723|1323|463|639|1405|415|1123|1157|277|977|689|295|339|575	1.38e-10		GO:0060191	1.01694e+16	0
40	17	Reactome Pathways		Signaling by FGFR3	6.89e-09	MAPK1|PPP2CB|KRAS|MAPK3|FGF2|BRAF|PPP2R1A|FGFR3|PTPN11|NRAS|MKNK1|SRC|SPRY2|GRB2|SHC1|HRAS|PPP2CA	202	809|729|317|933|1161|1257|1163|1323|1285|1451|249|815|1253|1271|803|277|379	1.78e-10		HSA-5654741	1.01618e+16	0
40	17	Reactome Pathways		MAP2K and MAPK activation	6.89e-09	MAPK1|CSK|RAF1|KRAS|MAP2K2|MAPK3|BRAF|ARAF|MAP2K1|NRAS|YWHAB|SRC|KSR1|ARRB2|HRAS|ARRB1|MARK3	202	809|1237|241|317|821|933|1257|819|409|1451|923|815|1375|887|277|701|953	1.78e-10		HSA-5674135	1.01618e+16	0
1293	96	GO Biological Process		Protein-containing complex assembly	7.46e-09	SF3A1|SNRPD3|AGO2|VTN|APOC3|SKP1|APOB|WDR77|APOA1|HIST1H4F|RAF1|APOE|FUS|SCO1|MBD2|CCNB1|MDM2|COX17|AXIN1|MAPK3|CUL3|EGF|TRPV5|SNRPF|TP53|PFKL|GEMIN7|SNRPG|GEMIN6|WNT3A|APP|GEMIN5|CCT8|CCT3|CCT2|SNRPD1|GEMIN2|VAMP2|CLU|TCP1|PRMT5|GEMIN4|PPP2R1A|GSK3B|CUL1|P4HB|MAPT|SNRPD2|PRMT7|CTNNB1|PFKM|OCLN|APOA4|MAX|G3BP2|EIF3B|PARK2|APOA2|DDX20|SET|RBBP4|HDAC1|SRC|APOM|RBBP7|GEMIN8|PFKP|SNX9|PPP6R3|BAD|CDK1…	202	411|773|1097|505|429|1195|679|1393|583|1131|241|1041|1199|869|1113|685|523|991|1383|933|1481|577|1059|1421|865|1095|527|417|1173|265|361|495|1261|347|1075|935|611|501|313|911|941|905|1163|1177|925|1533|1297|1119|1091|989|1089|485|463|747|423|1065|699|639|1093|563|267|651|815|1015|929|1529|1535|1373|1515|1043|1449|1267|743|413|351|635|763|473|491|795|1193|531|243|517|1329|745|1317|1145|689|295|339…	1.52e-10		GO:0065003	1012726117252733	0
47	18	GO Biological Process		Plasma lipoprotein particle organization	7.93e-09	CETP|APOC3|APOB|APOA1|APOE|LCAT|PLA2G7|ALB|LPA|P4HB|APOA4|APOA2|APOM|PLTP|APOA5|APOC1|APOC2|APOC4	202	655|429|679|583|1041|963|1283|515|999|1533|463|639|1015|293|689|295|339|649	1.62e-10		GO:0071827	1.01007e+16	0
3282	184	GO Biological Process		Cellular nitrogen compound metabolic process	8.1e-10	SF3A1|SNRPD3|MAPK1|PMM1|PAPOLA|CTSG|GNPNAT1|AGO2|FBL|GCK|ALDOC|NFKB1|CCND1|ENO1|WDR77|TTR|CPSF3|PAPOLG|TARDBP|HIST1H4F|SYMPK|MBD4|GFPT2|G6PC|PPP1R1B|FUS|LGALS3|EIF2S1|CCNB1|CDK4|IGF2BP3|THOC1|MAPK3|SMG6|PAX8|CTCF|DNMT3A|AMBP|SRF|IDE|SNRPF|PMM2|TP53|PFKL|GEMIN7|SNRPG|EGFR|MTA2|GEMIN6|APP|GEMIN5|PPARG|FUK|HK2|SSU72|FLAD1|HK3|BAX|EIF4A1|GNPDA2|ABCE1|RAD21|CPSF2|SNRPD1|LSM3|HINT1|COMMD1|RPS6KB2|GEMIN…	202	411|773|809|1435|1513|1301|451|1097|1353|871|1291|437|377|767|1393|1303|1265|891|1107|1131|1497|599|1519|475|751|1199|1039|765|685|1395|1101|783|933|1085|1527|957|551|1083|1223|1485|1421|333|865|1095|527|417|969|1459|1173|361|495|459|853|727|395|373|567|1403|1037|353|1469|1287|1467|935|233|387|1191|619|611|1539|855|1273|513|471|771|941|1205|1471|905|1057|1263|1163|879|443|541|1545|1419|901|1297|7…	1.66e-10		GO:0034641	1009151498112135	0
34	16	Reactome Pathways		Signaling by WNT in cancer	8.87e-09	PPP2R5B|PPP2CB|LRP6|PPP2R5A|AXIN1|WNT3A|LRP5|PPP2R1B|PPP2R1A|GSK3B|PPP2R5E|CTNNB1|PPP2R5C|PPP2R5D|PPP2CA|CSNK1A1	202	663|729|1361|1349|1383|265|445|1495|1163|1177|1389|989|799|1135|379|745	2.37e-10		HSA-4791275	1.00521e+16	0
449	50	GO Biological Process		Negative regulation of phosphorylation	8.88e-09	C12orf5|CSK|TARDBP|PIN1|APOE|PPP1R1B|CCNB1|LRP6|PPP2R5A|IPO5|AMBP|RB1|BAX|LRP5|PLK1|YWHAG|MLXIPL|PPP2R1A|MAPT|SFN|FOXM1|OCLN|ANKLE2|MTOR|SNX6|FGFR1OP|PARK2|PPP1R15B|IGBP1|PFKFB1|IRS2|SPRY2|PRKCZ|DVL1|IGFBP3|SH3BP5|AHSG|RHOA|MYOCD|ARRB2|FBP1|ARRB1|CDKN1C|EIF4G1|NCK1|PPP2R5D|PPP2CA|LYN|AKT1|MYC	202	1521|1237|1107|609|1041|751|685|1361|1349|461|1083|787|1403|445|299|895|683|1163|1297|439|713|485|393|593|1061|907|699|1369|889|1335|1411|1253|415|1211|1229|735|939|1157|755|887|647|701|665|1397|517|1135|379|1111|1231|391	1.83e-10		GO:0042326	1.00516e+16	0
27	15	GO Biological Process		Canonical glycolysis	8.92e-09	GCK|ALDOC|ENO1|PFKL|HK2|HK3|ADPGK|PKM|ENO3|PKLR|PFKM|PFKP|HK1|GPI|ENO2	202	871|1291|767|1095|727|567|1273|1471|1263|1419|1089|1535|1219|1541|1109	1.85e-10		GO:0061621	1.00496e+16	0
155	29	GO Biological Process		Peptidyl-tyrosine phosphorylation	8.95e-09	CSK|PDGFRA|PDGFRB|FLT4|MAP2K2|MAPK3|KDR|EGF|ERBB3|ERBB2|EGFR|FLT1|KIT|FGFR4|MAP2K1|INSR|MET|LCK|FGFR3|ERBB4|FYN|IGF2R|SRC|TEK|FGFR1|FGFR2|LYN|NTRK1|YES1	202	1237|509|557|641|821|933|371|577|715|741|969|1387|723|807|409|983|637|915|1323|1151|1509|483|815|1215|1123|977|1111|467|1269	1.87e-10		GO:0018108	1.00482e+16	0
41	17	Reactome Pathways		Signaling by FGFR4	8.98e-09	MAPK1|PPP2CB|KRAS|MAPK3|FGF2|BRAF|FGFR4|PPP2R1A|PTPN11|NRAS|MKNK1|SRC|SPRY2|GRB2|SHC1|HRAS|PPP2CA	202	809|729|317|933|1161|1257|807|1163|1285|1451|249|815|1253|1271|803|277|379	2.44e-10		HSA-5654743	1.00467e+16	0
41	17	Reactome Pathways		Signaling by RAF1 mutants	8.98e-09	MAPK1|CSK|RAF1|KRAS|MAP2K2|MAPK3|BRAF|ARAF|MAP2K1|NRAS|YWHAB|SRC|KSR1|ARRB2|HRAS|ARRB1|MARK3	202	809|1237|241|317|821|933|1257|819|409|1451|923|815|1375|887|277|701|953	2.44e-10		HSA-9656223	1.00467e+16	0
65	20	Reactome Pathways		Signaling by BRAF and RAF fusions	9.42e-09	MAPK1|CSK|RAF1|KRAS|MAP2K2|MAPK3|BRAF|ARAF|MAP2K1|SND1|FXR1|LMNA|NRAS|YWHAB|SRC|KSR1|ARRB2|HRAS|ARRB1|MARK3	202	809|1237|241|317|821|933|1257|819|409|987|707|519|1451|923|815|1375|887|277|701|953	2.64e-10		HSA-6802952	1.00259e+16	0
211	32	KEGG Pathways		Human T-cell leukemia virus 1 infection	9.56e-09	MAPK1|NFKB1|CCND1|PPP3R1|EGR1|CCNA1|KRAS|CDK4|MAP2K2|MAPK3|AKT3|VDAC1|SRF|RB1|TP53|CCNA2|BAX|MAP2K1|LCK|TGFBR2|NRAS|CDC20|AKT2|PPP3CB|PPP3CA|RELA|CHEK1|HRAS|SLC2A1|CDC27|AKT1|MYC	202	809|437|377|585|851|671|317|1395|821|933|273|967|1223|787|865|979|1403|409|915|1487|1451|625|877|1363|1371|389|457|277|243|367|1231|391	1.91e-09		hsa05166	100195421077239	0
532	55	GO Biological Process		Response to wounding	9.74e-09	APOH|MAPK1|PLAT|FGFR1OP2|APOA1|RAF1|PDGFRA|PDGFRB|MAPK3|KDR|FGF2|SRF|ERBB3|ERBB2|RAB5A|EGFR|MYL9|WNT3A|RHOC|BAX|WNT1|CTNNA1|F2|GP6|PLG|PPARD|F2R|LCK|PLAUR|PTPN11|FYN|MKL1|MAX|TGFBR2|MTOR|PABPC4|HDAC1|SRC|PDCD10|CDK1|YWHAZ|INS|BCL2|RHOA|ARRB2|PRKCA|ARRB1|FGFR2|SERPINE2|SERPINA1|LYN|HDAC2|NTRK1|ANXA8|EHD1	202	239|809|529|1125|583|241|509|557|933|371|1161|1223|715|741|1023|969|779|265|279|1403|675|545|579|571|281|855|1127|915|329|1285|1509|1005|747|1487|593|955|651|815|255|1449|1143|1457|749|1157|887|497|701|977|1141|531|1111|421|467|575|1081	2.05e-10		GO:0009611	1.00114e+16	0
483	52	GO Biological Process		Response to extracellular stimulus	9.93e-09	MAPK1|PON1|RPS6KB1|CCND1|IGFBP2|APOA1|MYOD1|APOE|G6PC|EIF2S1|MBD2|MDM2|SLC6A4|MAPK3|DNMT3A|SRF|SORD|ASGR1|TP53|EGFR|PPARG|ALB|PPARD|PKM|TRIM25|ULK1|EIF4EBP1|ENSA|MAX|TGFBR2|MTOR|ACTA1|NENF|SRC|PFKFB1|STK24|FKBP1B|G6PD|MST4|ULK2|BCL2|RELA|MYOCD|TBC1D5|EIF4G1|SLC2A1|HFE|LYN|NTRK1|LDHA|AKT1|PPP1R9B	202	809|841|337|377|1427|583|1281|1041|475|765|1113|523|843|933|551|1223|1543|403|865|969|459|515|855|1471|1057|1433|901|355|747|1487|593|603|827|815|1335|247|643|1045|399|913|749|389|755|721|1397|243|1329|1111|467|971|1231|385	2.1e-11		GO:0009991	1.00031e+16	0
550	56	GO Biological Process		Regulation of vesicle-mediated transport	1.05e-08	UNC13D|MAPK1|CSK|VTN|APOC3|SNX17|APOA1|C3|SNX4|APOE|LGALS3|DNAJC13|MAP2K2|MAPK3|RAB7A|EGF|RAB5A|WNT3A|APP|PPARG|MAP2K1|INSR|VAMP2|CLU|GSK3B|HGS|LAMP1|ANXA2|TRPV6|PARK2|APOA2|HTR1B|FMR1|SRC|ANXA1|ATXN2|DVL1|AKT2|GPC3|PPP3CB|PPP3CA|TF|AHSG|TBC1D5|ARRB2|ARRB1|HFE|TFR2|LYN|RIMS4|APOA5|PPFIA2|ANKFY1|APOC1|APOC2|EHD1	202	1461|809|1237|505|429|573|583|1445|433|1041|1039|667|821|933|633|577|1023|265|361|459|409|983|501|313|1177|559|1355|521|695|699|639|1071|951|815|1405|359|1211|877|287|1363|1371|1189|939|721|887|701|1329|435|1111|535|689|1537|753|295|339|1081	2.23e-10		GO:0060627	9978810700930062	0
147	28	Reactome Pathways		Mitotic G1 phase and G1/S transition	1.09e-08	PPP2CB|CCND1|SKP1|CCNA1|CCNB1|CDK4|RBL2|AKT3|RB1|CCNA2|PSME3|PPP2R1B|PPP2R1A|PPP2R2A|CUL1|MAX|RBBP4|HDAC1|SRC|RBL1|PPP2R3B|AKT2|CDK1|CDKN1C|PPP2CA|LYN|AKT1|MYC	202	729|377|1195|671|685|1395|1415|273|787|979|229|1495|1163|879|925|747|267|651|815|657|1475|877|1449|665|379|1111|1231|391	3.11e-10		HSA-453279	9962573502059376	0
405	47	GO Biological Process		Generation of precursor metabolites and energy	1.1e-09	GCK|ALDOC|ENO1|GFPT2|G6PC|PPP1R1A|COX17|PFKL|PPP1R3A|AKR1B1|HK2|HK3|CYCS|PPARD|ADPGK|PKM|TALDO1|ENO3|GSK3B|PPP1CA|SLC25A18|PKLR|PPP1CC|PFKM|HKDC1|GFPT1|MTOR|PFKFB2|PGM1|PFKFB1|GLRX|PFKP|PGM2|FECH|AKT2|G6PD|PPP1CB|TKT|HK1|GPI|DERA|GNPDA1|ENO2|LDHA|AKT1|H6PD|MYC	202	871|1291|767|1519|475|1399|991|1095|777|769|727|567|873|855|1273|1471|1483|1263|1177|837|1187|1419|881|1089|993|1377|593|1319|757|1335|961|1535|801|677|877|1045|1277|1007|1219|1541|1517|595|1109|971|1231|1331|391	2.34e-10		GO:0006091	9958607314841774	0
123	26	GO Biological Process		Regulation of phosphatidylinositol 3-kinase signaling	1.13e-08	PPP2R5B|MAPK1|PDGFRA|PDGFRB|MAPK3|KDR|ERBB3|EGFR|FLT1|KIT|IGF1|INSR|F2|PPARD|F2R|ERBB4|FYN|SRC|IRS2|TEK|INS|FGFR1|PPP2R5C|SERPINE2|LYN|NTRK1	202	663|809|509|557|933|371|715|969|1387|723|1473|983|579|855|1127|1151|1509|815|1411|1215|1457|1123|799|1141|1111|467	2.41e-10		GO:0014066	994692155651658	0
929	77	GO Biological Process		Regulation of cell motility	1.14e-08	APOH|MAPK1|AGO2|VTN|IGFBP5|PIN1|RAF1|APOE|LGALS3|PDGFRA|MDM2|CDH1|PDGFRB|FLT4|MAPK3|AKT3|KDR|FGF2|PPP2R3A|EGF|SRF|ERBB3|NKD1|ERBB2|PLA2G7|EGFR|MTA2|FLT1|APP|RHOC|PPARG|KIT|IGF1|INSR|CTNNA1|CXCL8|PLG|PPARD|MET|CXCR2|F2R|HDAC6|ERBB4|ATP7A|NKX2-1|PTRF|TGFBR2|MTOR|FGFR1OP|LMNA|S100A7|SRC|IRS2|STK24|ANXA1|SPRY2|DDX58|TEK|IGFBP3|AKT2|PDCD10|MST4|PPP3CA|INS|BCL2|TF|FGFR1|RHOA|MYOCD|GPI|HRAS|PRKCA|SERPIN…	202	239|809|1097|505|1407|609|241|1041|1039|509|523|271|557|641|933|273|371|1161|1365|577|1223|715|867|741|1283|969|1459|1387|361|279|459|723|1473|983|545|301|281|855|637|909|1127|493|1151|591|1003|525|1487|593|907|519|1233|815|1411|247|1405|1253|1053|1215|1229|877|255|399|1371|1457|749|1189|1123|1157|755|1541|277|497|1141|517|1111|1231|847	2.43e-10		GO:2000145	9943095148663528	0
35	16	Reactome Pathways		Regulation of TP53 Degradation	1.15e-08	PPP2CB|CCNA1|MDM2|AKT3|TP53|CCNA2|PPP2R1B|PPP2R1A|CCNG1|MTOR|CHEK2|AKT2|CDK1|PPP2R5C|PPP2CA|AKT1	202	729|671|523|273|865|979|1495|1163|569|593|283|877|1449|799|379|1231	3.35e-10		HSA-6804757	9939302159646388	0
169	30	GO Biological Process		Cellular response to insulin stimulus	1.17e-08	GCK|RPS6KB1|G6PC|CDK4|IDE|IGFBP1|PPARG|PRKCI|INSR|IRS1|YWHAG|VAMP2|PKM|GSK3B|ATP6V0A2|PKLR|EIF4EBP1|IRS4|SRC|IRS2|PRKCZ|PTPRA|AKT2|GRB2|INS|VIMP|IGF2|SHC1|AKT1|DENND4C	202	871|337|475|1395|1485|1279|459|303|983|453|895|501|1471|1177|949|1419|901|719|815|1411|415|1479|877|1271|1457|731|401|803|1231|1409	2.52e-10		GO:0032869	9931814138253838	0
50	18	Reactome Pathways		Signaling by ERBB2	1.27e-08	KRAS|AKT3|EGF|ERBB3|ERBB2|EGFR|ERBB4|FYN|NRAS|SRC|AKT2|GRB2|RHOA|SHC1|HRAS|PRKCA|AKT1|YES1	202	317|273|577|715|741|969|1151|1509|1451|815|877|1271|1157|803|277|497|1231|1269	3.79e-10		HSA-1227986	9896196279044044	0
115	25	Reactome Pathways		Signaling by NTRK1 (TRKA)	1.27e-08	MAPK1|PPP2CB|EGR1|KRAS|MAP2K2|MAPK3|SRF|BRAF|MAP2K1|IRS1|MAPK7|PPP2R1B|PPP2R1A|CHD4|NRAS|YWHAB|SRC|IRS2|GRB2|RHOA|SHC1|HRAS|PPP2R5D|PPP2CA|NTRK1	202	809|729|851|317|821|933|1223|1257|409|453|1429|1495|1163|1351|1451|923|815|1411|1271|1157|803|277|1135|379|467	3.74e-10		HSA-187037	9896196279044044	0
1009	81	GO Biological Process		Regulation of cellular component movement	1.31e-08	APOH|MAPK1|AGO2|VTN|IGFBP5|PIN1|RAF1|APOE|LGALS3|PDGFRA|MDM2|CDH1|PDGFRB|FLT4|MAPK3|AKT3|KDR|FGF2|PPP2R3A|EGF|SRF|ERBB3|NKD1|ERBB2|PLA2G7|EGFR|MTA2|FLT1|WNT3A|APP|RHOC|PPARG|KIT|IGF1|INSR|CTNNA1|CXCL8|PLG|PPARD|MET|CXCR2|F2R|LAMP1|HDAC6|ERBB4|ATP7A|NKX2-1|PTRF|TGFBR2|MTOR|FGFR1OP|LMNA|S100A7|YTHDF1|SRC|IGBP1|IRS2|STK24|ANXA1|SPRY2|DDX58|TEK|IGFBP3|AKT2|PDCD10|MST4|PPP3CA|INS|BCL2|TF|FGFR1|RHOA|MY…	202	239|809|1097|505|1407|609|241|1041|1039|509|523|271|557|641|933|273|371|1161|1365|577|1223|715|867|741|1283|969|1459|1387|265|361|279|459|723|1473|983|545|301|281|855|637|909|1127|1355|493|1151|591|1003|525|1487|593|907|519|1233|691|815|889|1411|247|1405|1253|1053|1215|1229|877|255|399|1371|1457|749|1189|1123|1157|755|1541|277|497|1141|517|1111|1231|847	2.84e-10		GO:0051270	9882728704344236	0
695	64	GO Biological Process		Mitotic cell cycle	1.51e-08	RPS6KB1|CCND1|SKP1|CCNA1|CCNB1|CDK4|MDM2|RBL2|SGOL1|YWHAE|CUL3|DNMT3A|RB1|TP53|CCNA2|RASA1|RHOC|BAX|PLK1|BUB1|YWHAG|BANF1|PPP2R1A|PPP2R2A|CUL1|EIF4EBP1|PTPN11|SFN|ENSA|FOXM1|CCNG1|ANKLE2|MAX|VCP|DCTN1|FGFR1OP|LMNA|CDC20|MASTL|SPRY2|CHEK2|SNX9|PBRM1|PPP3CA|CDK1|PPP1CB|PPME1|LCMT1|PPP1R12A|PPP2R2D|RHOA|CNEP1R1|PRMT1|HRAS|PRKCA|PPP2R5C|PPP2CA|EIF4E|CDC27|ARPP19|CTDNEP1|MYC|CTDP1|MIS12	202	337|377|1195|671|685|1395|523|1415|465|1001|1481|551|787|865|979|1035|279|1403|299|1511|895|1423|1163|879|925|901|1285|439|355|713|569|393|747|397|615|907|519|625|1295|1253|283|1373|1357|1371|1449|1277|1079|797|1055|845|1157|1121|473|277|497|799|379|1201|367|547|1209|391|1063|943	3.31e-10		GO:0000278	9821023052706832	0
96	22	KEGG Pathways		Choline metabolism in cancer	1.51e-08	MAPK1|RPS6KB1|RAF1|KRAS|PDGFRA|PDGFRB|MAP2K2|MAPK3|AKT3|EGF|EGFR|MAP2K1|RPS6KB2|EIF4EBP1|MTOR|PLA2G4A|NRAS|AKT2|GRB2|HRAS|PRKCA|AKT1	202	809|337|241|317|509|557|821|933|273|577|969|409|619|901|593|1017|1451|877|1271|277|497|1231	3.05e-09		hsa05231	9821023052706832	0
51	18	Reactome Pathways		Intrinsic Pathway for Apoptosis	1.61e-08	MAPK1|PPP3R1|YWHAH|MAPK3|AKT3|YWHAE|TP53|BAX|YWHAG|CYCS|SFN|YWHAB|YWHAQ|AKT2|BAD|YWHAZ|BCL2|AKT1	202	809|585|831|933|273|1001|865|1403|895|873|439|923|833|877|1043|1143|749|1231	4.97e-10		HSA-109606	979317412396815	0
184	31	GO Biological Process		Receptor-mediated endocytosis	1.64e-08	M6PR|MICALL1|APOB|SNX17|APOA1|APOE|DNAJC13|LRP6|SNX1|AMBP|HPX|ASGR1|RAB5A|ALB|INSR|CXCL8|APOL1|CXCR2|CALCA|HP|IGF2R|TGFBR2|TFRC|FCGR1A|HTR1B|SNX9|GRB2|ARRB2|ARRB1|TFR2|HPR	202	1343|813|679|573|583|1041|667|1361|289|1083|1493|403|1023|515|983|301|331|909|849|875|483|1487|605|407|1071|1373|1271|887|701|435|1047	3.61e-10		GO:0006898	9785156151952302	0
291	39	GO Biological Process		Regulation of canonical Wnt signaling pathway	1.67e-08	DVL2|NFKB1|IGFBP2|EGR1|PIN1|APOE|LRP6|AXIN1|CUL3|PPP2R3A|EGF|NKD1|IGFBP4|EGFR|IGFBP1|WNT3A|APP|FZD1|PSME3|VPS35|IGFBP6|DVL3|GSK3B|PPP1CA|CTNNB1|VCP|PARK2|FRAT1|HDAC1|SRC|DVL1|G3BP1|GPC3|CTNND1|DDX3X|FGFR2|CSNK1A1|STK3|CTDNEP1	202	431|437|1427|851|609|1041|1361|1383|1481|1365|577|867|335|969|1279|265|361|503|229|1021|1293|581|1177|837|989|397|699|321|651|815|1211|1241|287|709|1499|977|745|1439|1209	3.67e-10		GO:0060828	9777283528852416	0
204	31	KEGG Pathways		Human immunodeficiency virus 1 infection	1.84e-08	MAPK1|RPS6KB1|NFKB1|SKP1|PPP3R1|RAF1|KRAS|CCNB1|MAP2K2|MAPK3|AKT3|BAX|MAP2K1|CYCS|RPS6KB2|CUL1|MTOR|NRAS|IRAK1|MB21D1|AKT2|BAD|PPP3CB|PPP3CA|CDK1|BCL2|RELA|CHEK1|HRAS|PRKCA|AKT1	202	809|337|437|1195|585|241|317|685|821|933|273|1403|409|873|619|925|593|1451|945|561|877|1043|1363|1371|1449|749|389|457|277|497|1231	3.77e-09		hsa05170	9735182176990464	0
719	65	GO Biological Process		Positive regulation of cell death	2.11e-08	C12orf5|PPP3R1|EGR1|PIN1|STYXL1|YWHAH|APOE|EIF2S1|SORT1|CDK4|PDGFRB|YWHAE|DNMT3A|TP53|WNT3A|APP|PPARG|BAX|PRKCI|CTNNA1|YWHAG|CYCS|PPP2R1B|CLU|CXCR2|F2R|PPP2R1A|GSK3B|PPP1CA|HDAC6|LCK|PLAUR|MAPT|SFN|CTNNB1|FYN|HP|IGF2R|VCP|MTOR|DDX20|YWHAB|SRC|ANXA1|IGFBP3|YWHAQ|CHEK2|BAD|SLC11A2|YWHAZ|BCL2|DDX3X|RHOA|TIA1|ARRB2|ARRB1|EIF4G1|NCK1|LYN|STK3|NTRK1|HPR|LDHA|AKT1|MYC	202	1521|585|851|609|711|831|1041|765|1155|1395|557|1001|551|865|265|361|459|1403|303|545|895|873|1495|313|909|1127|1163|1177|837|493|915|329|1297|439|989|1509|875|483|397|593|1093|923|815|1405|1229|833|283|1043|1507|1143|749|1499|1157|1235|887|701|1397|517|1111|1439|467|1047|971|1231|391	4.67e-10		GO:0010942	9675717544702308	0
266	37	GO Biological Process		Nuclear transport	2.25e-08	SNRPD3|NUTF2|CPSF3|SYMPK|IPO5|THOC1|SMG6|SNRPF|TP53|GEMIN7|SNRPG|GEMIN6|GEMIN5|ABCE1|HSPA9|CPSF2|SNRPD1|GEMIN2|BANF1|GEMIN4|FIP1L1|SNRPD2|SMG5|LMNA|DDX20|PPP1R10|GEMIN8|PPP3CA|ELAVL1|SNRPE|SNRPB|ANP32A|SMG7|EIF4E|AKT1|UPF1|CPSF1	202	773|629|1265|1497|461|783|1085|1421|865|527|417|1173|495|1469|973|1467|935|611|1423|905|1545|1119|1505|519|1093|539|1529|1371|413|763|795|1073|1413|1201|1231|959|965	4.98e-10		GO:0051169	9647817481888638	0
151	28	GO Biological Process		Regulation of lipid localization	2.45e-08	CETP|PON1|MEST|NFKB1|APOC3|APOB|APOA1|C3|APOE|EGF|PPARG|PPARD|PTPN11|ANXA2|APOA4|PARK2|APOA2|FABP3|IRS2|AKT2|PLTP|DBI|APOA5|AKT1|APOC1|APOC2|APOC4|EHD1	202	655|841|829|437|429|679|583|1445|1041|577|459|855|1285|521|463|699|639|1031|1411|877|293|419|689|1231|295|339|649|1081	5.46e-10		GO:1905952	9610833915635468	0
79	21	Reactome Pathways		RNA Polymerase I Transcription	2.53e-08	MBD2|MAPK3|MTA2|H2AFZ|H2AFV|HIST1H2AJ|HIST2H2AC|HIST1H2AD|CHD4|PTRF|GATAD2A|GATAD2B|RBBP4|HDAC1|HIST1H2AC|RBBP7|CHD3|HDAC2|H2AFX|H2AFJ|H2AFB1	202	1113|933|1459|349|839|789|1391|931|1351|525|617|1019|267|651|1009|929|1337|421|1145|1027|1243	7.91e-10		HSA-73864	9596879478824182	0
14	12	Reactome Pathways		APC truncation mutants have impaired AXIN binding	2.55e-08	PPP2R5B|PPP2CB|PPP2R5A|AXIN1|PPP2R1B|PPP2R1A|GSK3B|PPP2R5E|PPP2R5C|PPP2R5D|PPP2CA|CSNK1A1	202	663|729|1349|1383|1495|1163|1177|1389|799|1135|379|745	8.25e-10		HSA-5467337	9593459819566044	0
14	12	Reactome Pathways		AXIN missense mutants destabilize the destruction complex	2.55e-08	PPP2R5B|PPP2CB|PPP2R5A|AXIN1|PPP2R1B|PPP2R1A|GSK3B|PPP2R5E|PPP2R5C|PPP2R5D|PPP2CA|CSNK1A1	202	663|729|1349|1383|1495|1163|1177|1389|799|1135|379|745	8.25e-10		HSA-5467340	9593459819566044	0
14	12	Reactome Pathways		Truncations of AMER1 destabilize the destruction complex	2.55e-08	PPP2R5B|PPP2CB|PPP2R5A|AXIN1|PPP2R1B|PPP2R1A|GSK3B|PPP2R5E|PPP2R5C|PPP2R5D|PPP2CA|CSNK1A1	202	663|729|1349|1383|1495|1163|1177|1389|799|1135|379|745	8.25e-10		HSA-5467348	9593459819566044	0
45	17	Reactome Pathways		Signaling by moderate kinase activity BRAF mutants	2.55e-08	MAPK1|CSK|RAF1|KRAS|MAP2K2|MAPK3|BRAF|ARAF|MAP2K1|NRAS|YWHAB|SRC|KSR1|ARRB2|HRAS|ARRB1|MARK3	202	809|1237|241|317|821|933|1257|819|409|1451|923|815|1375|887|277|701|953	8.09e-10		HSA-6802946	9593459819566044	0
45	17	Reactome Pathways		Paradoxical activation of RAF signaling by kinase inactive BRAF	2.55e-08	MAPK1|CSK|RAF1|KRAS|MAP2K2|MAPK3|BRAF|ARAF|MAP2K1|NRAS|YWHAB|SRC|KSR1|ARRB2|HRAS|ARRB1|MARK3	202	809|1237|241|317|821|933|1257|819|409|1451|923|815|1375|887|277|701|953	8.09e-10		HSA-6802955	9593459819566044	0
45	17	Reactome Pathways		Signaling downstream of RAS mutants	2.55e-08	MAPK1|CSK|RAF1|KRAS|MAP2K2|MAPK3|BRAF|ARAF|MAP2K1|NRAS|YWHAB|SRC|KSR1|ARRB2|HRAS|ARRB1|MARK3	202	809|1237|241|317|821|933|1257|819|409|1451|923|815|1375|887|277|701|953	8.09e-10		HSA-9649948	9593459819566044	0
25	14	Reactome Pathways		Cyclin A/B1/B2 associated events during G2/M transition	2.59e-08	PPP2CB|CCNA1|CCNB1|CCNA2|PLK1|PPP2R1B|PPP2R1A|PPP2R2A|FOXM1|PPP2R3B|CDK1|PPME1|LCMT1|PPP2CA	202	729|671|685|979|299|1495|1163|879|713|1475|1449|1079|797|379	9.42e-10		HSA-69273	9586700235918748	0
1750	116	GO Biological Process		Organic substance catabolic process	2.6e-09	PPP2CB|PON1|GCK|ALDOC|APOC3|SKP1|APOB|SNX17|ENO1|FAAH|LIPE|GOT2|YWHAH|MBD4|APOE|G6PC|CCNB1|MDM2|DERL1|KHK|SMG6|TREH|CUL3|FGF2|RAB7A|AMBP|IDE|SORD|PFKL|GALM|PLA2G7|HK2|HK3|PSME3|WNT1|LRP5|GNPDA2|FABP1|FABP5|PLK1|LSM3|GUSB|HINT1|GLB1|PLG|PPARD|ADPGK|PABPC1|CLU|RBBP6|PKM|UBE2O|TRIM25|ENO3|PPP2R1A|PPP2R2A|CUL1|HDAC6|PKLR|CTNNB1|CTSB|PFKM|ANXA2|HKDC1|SND1|APOA4|VCP|EDC4|AKR1B10|MTOR|SMG5|PARK2|PFKFB2|…	202	729|841|871|1291|429|1195|679|573|767|825|863|737|831|599|1041|475|685|523|861|425|1085|1203|1481|1161|633|1083|1485|1543|1095|1289|1283|727|567|229|675|445|353|631|1105|299|233|1051|387|1251|281|855|1273|513|313|471|1471|1531|1057|1263|1163|879|925|493|1419|989|985|1089|521|993|987|463|397|1381|733|593|1505|699|1319|1017|639|1183|757|625|955|1031|1335|447|1535|801|283|287|1013|1043|1449|1437|731…	5.81e-10		GO:1901575	9585026652029182	0
37	16	GO Biological Process		NADH metabolic process	2.91e-08	GCK|ALDOC|ENO1|PFKL|HK2|HK3|ADPGK|PKM|ENO3|PKLR|PFKM|VCP|PFKP|HK1|GPI|ENO2	202	871|1291|767|1095|727|567|1273|1471|1263|1419|1089|397|1535|1219|1541|1109	6.52e-10		GO:0006734	9536107011014092	0
37	16	GO Biological Process		Regulation of glycogen metabolic process	2.91e-08	GCK|KHK|PPP1R3A|IGF1|INSR|IRS1|GSK3B|PPP1CA|MTOR|IRS2|AKT2|PPP1CB|INS|VIMP|IGF2|AKT1	202	871|425|777|1473|983|453|1177|837|593|1411|877|1277|1457|731|401|1231	6.52e-10		GO:0070873	9536107011014092	0
54	18	Reactome Pathways		Signaling by Type 1 Insulin-like Growth Factor 1 Receptor (IGF1R)	2.96e-08	KRAS|CILP|FGF2|FGFR4|IGF1|IRS1|FGFR3|PTPN11|NRAS|IRS4|IRS2|AKT2|GRB2|IGF2|FGFR1|SHC1|HRAS|FGFR2	202	317|251|1161|807|1473|453|1323|1285|1451|719|1411|877|1271|401|1123|803|277|977	1.09e-09		HSA-2404192	9528708288941060	0
54	18	Reactome Pathways		Insulin receptor signalling cascade	2.96e-08	MAPK1|KRAS|MAPK3|FGF2|FGFR4|INSR|IRS1|FGFR3|PTPN11|NRAS|IRS2|AKT2|GRB2|INS|FGFR1|SHC1|HRAS|FGFR2	202	809|317|933|1161|807|983|453|1323|1285|1451|1411|877|1271|1457|1123|803|277|977	1.09e-09		HSA-74751	9528708288941060	0
2042	129	GO Biological Process		Catabolic process	3e-09	C12orf5|MMP2|PPP2CB|PON1|GCK|ALDOC|APOC3|SKP1|APOB|SNX17|ENO1|FAAH|LIPE|GOT2|YWHAH|MBD4|APOE|G6PC|CCNB1|MDM2|DERL1|KHK|SMG6|TREH|CUL3|FGF2|RAB7A|AMBP|VDAC1|IDE|SORD|TP53|PFKL|GALM|PLA2G7|HK2|HK3|PSME3|WNT1|LRP5|GNPDA2|FABP1|FABP5|PLK1|LSM3|GUSB|HINT1|GLB1|PLG|PPARD|ADPGK|PABPC1|CLU|RBBP6|TPO|PKM|MMP1|UBE2O|TRIM25|ENO3|ULK1|PPP2R1A|PPP2R2A|CUL1|HGS|HDAC6|ATG101|PKLR|CTNNB1|CTSB|PFKM|ANXA2|HKDC1|SN…	202	1521|781|729|841|871|1291|429|1195|679|573|767|825|863|737|831|599|1041|475|685|523|861|425|1085|1203|1481|1161|633|1083|967|1485|1543|865|1095|1289|1283|727|567|229|675|445|353|631|1105|299|233|1051|387|1251|281|855|1273|513|313|471|555|1471|997|1531|1057|1263|1433|1163|879|925|559|493|1305|1419|989|985|1089|521|993|987|463|397|1381|733|593|1505|699|1319|1017|639|1183|757|625|955|365|815|1031|13…	6.78e-10		GO:0009056	9522878745280338	0
388	45	GO Biological Process		Positive regulation of cell cycle	3.13e-08	PPP2R5B|RPS6KB1|CCND1|CCNB1|CDK4|MDM2|LRP6|THOC1|SLC6A4|PDGFRB|RBL2|CUL3|EGF|RB1|TP53|EGFR|APP|BAX|LRP5|RAD21|IGF1|INSR|MLXIPL|EIF4EBP1|PTPN11|SFN|SRC|PPP1R10|ANXA1|CHEK2|CDK1|INS|DDX3X|CHEK1|IGF2|FGFR1|RHOA|PRMT1|PRKCA|FGFR2|PPP2R5C|EIF4G1|EIF4E|CDC27|AKT1	202	663|337|377|685|1395|523|1361|783|843|557|1415|1481|577|787|865|969|361|1403|445|1287|1473|983|683|901|1285|439|815|539|1405|283|1449|1457|1499|457|401|1123|1157|473|497|977|799|1397|1201|367|1231	7.1e-11		GO:0045787	9504455662453552	0
1520	105	GO Biological Process		Intracellular transport	3.22e-08	M6PR|SNRPD3|MICALL1|PMM1|NUTF2|SNX8|SNX17|CPSF3|SYMPK|YWHAH|SNX4|APOE|SORT1|DERL1|LRP6|IPO5|THOC1|SNX1|SMG6|YWHAE|CUL3|RAB7A|IDE|SNRPF|PMM2|TP53|GEMIN7|SNRPG|RAB5A|VPS26B|GEMIN6|APP|GEMIN5|WHAMM|BAX|PRKCI|IFT122|ABCE1|HSPA9|CPSF2|VPS35|SNRPD1|YWHAG|GEMIN2|F2|BANF1|SNX32|CLU|EEA1|KIAA0196|KIF1C|GEMIN4|UBE2O|DENND5A|HGS|LAMP1|HDAC6|FIP1L1|MAPT|SNRPD2|VCP|DCTN1|SNX6|SMG5|PEX3|LMNA|SNX27|DDX20|YWHAB|…	202	1343|773|813|1435|629|1025|573|1265|1497|831|433|1041|1155|861|1361|461|783|289|1085|1001|1481|633|1485|1421|333|865|527|417|1023|1385|1173|361|495|1347|1403|303|1367|1469|973|1467|1021|935|895|611|579|1423|565|313|1315|1181|263|905|1531|449|559|1355|493|1545|1297|1119|397|615|1061|1505|981|519|1227|1093|923|319|1031|539|447|415|533|1529|833|877|1373|1515|1043|1371|1143|1457|731|413|763|721|795|1…	7.32e-10		GO:0046907	9492144128304168	0
373	44	GO Biological Process		Regulation of binding	3.22e-08	PPP2CB|PON1|VTN|SYMPK|PIN1|APOE|EIF2S1|MBD2|DERL1|MAPK3|EGF|IDE|RB1|WNT3A|APP|PPARG|BAX|PLK1|IGF1|MET|GSK3B|PPP1CA|PLAUR|PRMT7|CTNNB1|ANXA2|PARK2|S100A10|FMR1|SRC|DVL1|PPP3CA|FKBP1A|MYOCD|ARRB2|ARRB1|MARK3|EIF4G1|HFE|PPP2CA|CSNK1A1|STK3|HDAC2|AKT1	202	729|841|505|1497|609|1041|765|1113|861|933|577|1485|787|265|361|459|1403|299|1473|637|1177|837|329|1091|989|521|699|697|951|815|1211|1371|743|755|887|701|953|1397|1329|379|745|1439|421|1231	7.35e-10		GO:0051098	9492144128304168	0
101	22	KEGG Pathways		Glucagon signaling pathway	3.43e-08	GCK|PPP3R1|G6PC|AKT3|G6PC3|PFKL|PPP4C|PKM|PFKM|PFKFB1|FBP2|G6PC2|PFKP|AKT2|PPP3CB|PPP3CA|PRMT1|FBP1|SLC2A1|LDHA|AKT1|SMEK2	202	871|585|475|273|1245|1095|775|1471|1089|1335|1255|897|1535|877|1363|1371|473|647|243|971|1231|1489	7.15e-09		hsa04922	9464705879957228	0
31	15	GO Biological Process		Regulation of glycogen biosynthetic process	3.71e-08	GCK|PPP1R3A|IGF1|INSR|IRS1|GSK3B|PPP1CA|MTOR|IRS2|AKT2|PPP1CB|INS|VIMP|IGF2|AKT1	202	871|777|1473|983|453|1177|837|593|1411|877|1277|1457|731|401|1231	8.49e-10		GO:0005979	9430626090384956	0
1874	121	GO Biological Process		Regulation of cell differentiation	4.1e-09	DVL2|PPP2R5B|CETP|UNC13D|MAPK1|NFKB1|CCND1|APOB|IGFBP5|APOA1|HIST1H4F|PIN1|STYXL1|YWHAH|MYOD1|RAF1|APOE|LGALS3|KRAS|SORT1|PDGFRA|MDM2|PPP2R3C|SLC6A4|PAX8|KDR|FGF2|SRF|RB1|TP53|ERBB2|EGFR|MYL9|WNT3A|APP|PPARG|FZD1|KIT|PSME3|WNT1|LRP5|PRKCI|HSPA9|MAP2K1|IGF1|CTNNA1|YWHAG|F2|PPARD|DVL3|SUZ12|KIAA0196|PRMT5|PPP2R1A|GSK3B|STK25|P4HB|DENND5A|CALCA|HDAC6|CAPRIN1|MAPT|PTPN11|SFN|PPP1CC|ERBB4|CTNNB1|FYN|N…	202	431|663|655|1461|809|437|377|679|1407|583|1131|609|711|831|1281|241|1041|1039|317|1155|509|523|1379|843|1527|371|1161|1223|787|865|741|969|779|265|361|459|503|723|229|675|445|303|973|409|1473|545|895|579|855|581|285|1181|941|1163|1177|1523|1533|449|849|493|883|1297|1285|439|881|1151|989|1509|1003|275|1487|593|699|697|691|951|625|1099|651|1197|247|1405|1253|415|1211|643|1229|1045|1043|1371|1449|91…	9.43e-10		GO:0045595	9387216143280264	0
73	20	Reactome Pathways		Signaling by FGFR2	4.16e-08	MAPK1|PPP2CB|KRAS|MAPK3|FGF2|BRAF|PPP2R1A|HNRNPM|PTPN11|TIAL1|NRAS|MKNK1|SRC|SPRY2|GRB2|SHC1|TIA1|HRAS|FGFR2|PPP2CA	202	809|729|317|933|1161|1257|1163|443|1285|237|1451|249|815|1253|1271|803|1235|277|977|379	1.57e-09		HSA-5654738	9380906669373256	0
678	62	GO Biological Process		mRNA metabolic process	4.19e-08	SF3A1|SNRPD3|PAPOLA|AGO2|WDR77|CPSF3|PAPOLG|TARDBP|SYMPK|FUS|LGALS3|THOC1|SMG6|SRF|SNRPF|TP53|GEMIN7|SNRPG|GEMIN6|APP|GEMIN5|SSU72|CPSF2|SNRPD1|LSM3|GEMIN2|PPARD|PABPC1|RBBP6|PRMT5|GEMIN4|PPP2R1A|PPP2R2A|HNRNPM|FIP1L1|SNRPD2|PRMT7|PPP4R2|ELAVL4|EDC4|SMG5|DDX20|FMR1|YBX1|CSTF2|GEMIN8|SNRPN|PAPOLB|ELAVL1|JMJD6|SNRPE|SNRPB|EIF4G1|PPP2CA|SMG7|CLNS1A|UPF1|DCP1A|DDX6|CSDE1|H2AFB1|CPSF1	202	411|773|1513|1097|1393|1265|891|1107|1497|1199|1039|783|1085|1223|1421|865|527|417|1173|361|495|395|1467|935|233|611|855|513|471|941|905|1163|879|443|1545|1119|1091|307|343|1381|1505|1093|951|1099|549|1529|1455|1049|413|351|763|795|1397|379|1413|1317|959|761|363|703|1243|965	9.69e-10		GO:0016071	9377785977033704	0
159	28	Reactome Pathways		Regulation of TP53 Activity	4.21e-08	PPP2CB|PIN1|CCNA1|MDM2|AKT3|TP53|CCNA2|MTA2|PPP2R1B|PRMT5|PPP2R1A|CCNG1|CHD4|GATAD2A|MTOR|GATAD2B|RBBP4|HDAC1|RBBP7|CHD3|CHEK2|AKT2|CDK1|CHEK1|PPP2R5C|PPP2CA|HDAC2|AKT1	202	729|609|671|523|273|865|979|1459|1495|941|1163|569|1351|617|593|1019|267|651|929|1337|283|877|1449|457|799|379|421|1231	1.61e-09		HSA-5633007	9375717904164332	0
1657	111	GO Biological Process		Neurogenesis	4.28e-08	DVL2|PPP2R5B|MAPK1|MICALL1|CSK|VTN|APOA1|C3|PIN1|STYXL1|YWHAH|APOE|KRAS|MDM2|LRP6|SLC6A4|CDH1|MAPK3|STRN|YWHAE|DNMT3A|PPP2R3A|SRF|ERBB3|RB1|NKD1|TP53|ERBB2|EGFR|WNT3A|APP|PPARG|FZD1|KIT|BAX|WNT1|PRKCI|MAP2K1|CTNNA1|YWHAG|F2|MAPK7|CLU|DVL3|SUZ12|MET|KIAA0196|PRMT5|FZD2|ULK1|GSK3B|STK25|DENND5A|HDAC6|CAPRIN1|WNT8B|MAPT|PTPN11|PPP1CC|ERBB4|CTNNB1|ATP7A|FYN|NKX2-1|WDR5|MTOR|PARK2|S100A6|YTHDF1|FMR1|C…	202	431|663|809|813|1237|505|583|1445|609|711|831|1041|317|523|1361|843|271|933|793|1001|551|1365|1223|715|787|867|865|741|969|265|361|459|503|723|1403|675|303|409|545|895|579|1429|313|581|285|637|1181|941|817|1433|1177|1523|449|493|883|245|1297|1285|881|1151|989|591|1509|1003|275|593|699|589|691|951|625|651|815|1411|247|1405|415|1211|1479|643|877|1271|1363|1371|1507|1449|913|1143|327|749|389|1123|11…	9.97e-10		GO:0022008	9368556230986828	0
46	16	KEGG Pathways		Amino sugar and nucleotide sugar metabolism	4.33e-08	PMM1|GNPNAT1|GCK|GFPT2|PMM2|FUK|HK2|HK3|GNPDA2|MPI|HKDC1|GFPT1|PGM2|HK1|GPI|GNPDA1	202	1435|451|871|1519|333|853|727|567|353|771|993|1377|801|1219|1541|595	9.14e-09		hsa00520	9363512103646634	0
46	16	KEGG Pathways		Type II diabetes mellitus	4.33e-08	MAPK1|GCK|MAPK3|HK2|HK3|INSR|IRS1|PKM|PKLR|HKDC1|MTOR|IRS4|IRS2|PRKCZ|INS|HK1	202	809|871|933|727|567|983|453|1471|1419|993|593|719|1411|415|1457|1219	9.14e-09		hsa04930	9363512103646634	0
237	34	Reactome Pathways		Chromatin modifying enzymes	4.5e-09	NFKB1|CCND1|WDR77|CDK4|DNMT3A|MTA2|H2AFZ|HIST1H2AA|COPRS|H2AFV|SUZ12|PRMT5|HIST1H2AJ|HIST2H2AC|HIST1H2AD|PRMT7|CHD4|WDR5|GATAD2A|GATAD2B|RBBP4|HDAC1|HIST1H2AC|RBBP7|CHD3|PBRM1|RELA|JMJD6|SMARCA4|PRMT1|HDAC2|H2AFX|H2AFJ|H2AFB1	202	437|377|1393|1395|551|1459|349|1103|323|839|285|941|789|1391|931|1091|1351|275|617|1019|267|651|1009|929|1337|1357|389|351|635|473|421|1145|1027|1243	1.74e-09		HSA-3247509	9346787486224656	0
409	46	GO Biological Process		Regulation of apoptotic signaling pathway	4.6e-09	PPP3R1|ENO1|STYXL1|YWHAH|RAF1|LGALS3|MDM2|YWHAE|RB1|TP53|BAX|PSME3|IGF1|CTNNA1|YWHAG|MAPK7|PPP2R1B|CLU|PPP2R1A|GSK3B|PPP1CA|P4HB|LCK|PLAUR|SFN|CTNNB1|FYN|PARK2|LMNA|YWHAB|HDAC1|SRC|AR|YWHAQ|BAD|YWHAZ|INS|BCL2|VIMP|DDX3X|RELA|FGFR1|ARRB2|NCK1|STK3|AKT1	202	585|767|711|831|241|1039|523|1001|787|865|1403|229|1473|545|895|1429|1495|313|1163|1177|837|1533|915|329|439|989|1509|699|519|923|651|815|1197|833|1043|1143|1457|749|731|1499|389|1123|887|517|1439|1231	1.07e-09		GO:2001233	9337242168318426	0
156	28	GO Biological Process		Positive regulation of mitotic cell cycle	4.61e-08	RPS6KB1|CCND1|CCNB1|CDK4|MDM2|PDGFRB|CUL3|EGF|RB1|EGFR|APP|LRP5|IGF1|INSR|EIF4EBP1|PTPN11|PPP1R10|ANXA1|CDK1|INS|DDX3X|IGF2|FGFR1|PRKCA|EIF4G1|EIF4E|CDC27|AKT1	202	337|377|685|1395|523|557|1481|577|787|969|361|445|1473|983|901|1285|539|1405|1449|1457|1499|401|1123|497|1397|1201|367|1231	1.08e-09		GO:0045931	9336299074610352	0
64	18	KEGG Pathways		Long-term potentiation	5.23e-08	MAPK1|PPP3R1|RAF1|KRAS|PPP1R1A|MAP2K2|MAPK3|BRAF|ARAF|MAP2K1|PPP1CA|PPP1CC|NRAS|PPP3CB|PPP3CA|PPP1CB|HRAS|PRKCA	202	809|585|241|317|1399|821|933|1257|819|409|837|881|1451|1363|1371|1277|277|497	1.14e-08		hsa04720	9281498311132724	0
55	18	GO Biological Process		Monosaccharide biosynthetic process	5.98e-08	ALDOC|ENO1|GOT2|G6PC|SORD|G6PC3|AKR1B1|TALDO1|ENO3|PGM1|PFKFB1|FBP2|G6PC2|G6PD|TKT|GPI|FBP1|ENO2	202	1291|767|737|475|1543|1245|769|1483|1263|757|1335|1255|897|1045|1007|1541|647|1109	1.41e-09		GO:0046364	9223298816011588	0
82	21	GO Biological Process		Positive regulation of protein localization to nucleus	6.12e-08	MAPK1|NUTF2|TARDBP|CCT7|IPO5|CDH1|CCT6A|CCT5|CCT8|CCT3|CCT2|PLK1|F2|TCP1|FYN|TFRC|SRC|CCT4|CDK1|INS|AKT1	202	809|629|1107|1311|461|271|455|601|1261|347|1075|299|579|911|1509|605|815|259|1449|1457|1231	1.44e-09		GO:1900182	9213248577854438	0
263	36	GO Biological Process		Nucleocytoplasmic transport	6.2e-09	SNRPD3|NUTF2|CPSF3|SYMPK|IPO5|THOC1|SMG6|SNRPF|TP53|GEMIN7|SNRPG|GEMIN6|GEMIN5|ABCE1|HSPA9|CPSF2|SNRPD1|GEMIN2|GEMIN4|FIP1L1|SNRPD2|SMG5|LMNA|DDX20|PPP1R10|GEMIN8|PPP3CA|ELAVL1|SNRPE|SNRPB|ANP32A|SMG7|EIF4E|AKT1|UPF1|CPSF1	202	773|629|1265|1497|461|783|1085|1421|865|527|417|1173|495|1469|973|1467|935|611|905|1545|1119|1505|519|1093|539|1529|1371|413|763|795|1073|1413|1201|1231|959|965	1.47e-09		GO:0006913	9207608310501746	0
128	24	KEGG Pathways		Relaxin signaling pathway	6.72e-08	MAPK1|MMP2|NFKB1|RAF1|KRAS|MAP2K2|MAPK3|AKT3|EGFR|MAP2K1|MMP1|TGFBR2|NRAS|SRC|PRKCZ|AKT2|GRB2|RELA|SHC1|ARRB2|HRAS|PRKCA|ARRB1|AKT1	202	809|781|437|241|317|821|933|273|969|409|997|1487|1451|815|415|877|1271|389|803|887|277|497|701|1231	1.48e-08		hsa04926	9172630726946174	0
95	21	KEGG Pathways		Melanogenesis	6.85e-08	DVL2|MAPK1|RAF1|KRAS|MAP2K2|MAPK3|WNT3A|FZD1|KIT|WNT1|MAP2K1|DVL3|FZD2|GSK3B|WNT8B|CTNNB1|NRAS|DVL1|HRAS|PRKCA|WNT8A	202	431|809|241|317|821|933|265|503|723|675|409|581|817|1177|245|989|1451|1211|277|497|1207	1.53e-08		hsa04916	9164309428507572	0
66	18	KEGG Pathways		Renal cell carcinoma	7.69e-08	MAPK1|RAF1|KRAS|MAP2K2|MAPK3|AKT3|BRAF|ARAF|MAP2K1|MET|PTPN11|NRAS|AKT2|GRB2|BAD|HRAS|SLC2A1|AKT1	202	809|241|317|821|933|273|1257|819|409|637|1285|1451|877|1271|1043|277|243|1231	1.74e-08		hsa05211	911407366019857	0
50	17	Reactome Pathways		Signaling by FGFR1	8e-09	MAPK1|PPP2CB|KRAS|MAPK3|FGF2|BRAF|PPP2R1A|PTPN11|NRAS|MKNK1|SRC|SPRY2|GRB2|FGFR1|SHC1|HRAS|PPP2CA	202	809|729|317|933|1161|1257|1163|1285|1451|249|815|1253|1271|1123|803|277|379	3.17e-09		HSA-5654736	9096910013008056	0
370	43	GO Biological Process		Regulation of Wnt signaling pathway	8.37e-08	DVL2|NFKB1|IGFBP2|EGR1|PIN1|APOE|MBD2|LRP6|AXIN1|CUL3|PPP2R3A|EGF|NKD1|IGFBP4|EGFR|IGFBP1|WNT3A|APP|FZD1|PSME3|VPS35|IGFBP6|DVL3|PPP2R1A|GSK3B|PPP1CA|CTNNB1|VCP|PARK2|FRAT1|HDAC1|SRC|DVL1|G3BP1|GPC3|CTNND1|DDX3X|SMARCA4|FGFR2|PPP2CA|CSNK1A1|STK3|CTDNEP1	202	431|437|1427|851|609|1041|1113|1361|1383|1481|1365|577|867|335|969|1279|265|361|503|229|1021|1293|581|1163|1177|837|989|397|699|321|651|815|1211|1241|287|709|1499|635|977|379|745|1439|1209	1.99e-09		GO:0030111	9077274542006740	0
57	18	GO Biological Process		Negative regulation of phosphoprotein phosphatase activity	9.66e-08	PPP1R15A|STYXL1|PPP1R1B|LGALS3|PPP1R1A|PPP4R4|GSK3B|PPP1R17|ENSA|TIPRL|SET|MASTL|PPP1R10|FKBP1B|PPME1|FKBP1A|ARPP19|PPP1R9B	202	739|711|751|1039|1399|1491|1177|717|355|811|563|1295|539|643|1079|743|547|385	2.3e-10		GO:0032515	9015022873584506	0
2173	133	GO Biological Process		Organic substance transport	9.94e-08	M6PR|CETP|APOH|MICALL1|PMM1|NUTF2|SNX8|RPS6KB1|APOC3|APOB|SNX17|APOA1|CPSF3|GOT2|SYMPK|YWHAH|SNX4|RAF1|APOE|G6PC|PPFIA1|SORT1|IGF2BP3|DERL1|DNAJC13|LRP6|IPO5|THOC1|SLC6A4|SNX1|SMG6|LCAT|YWHAE|RAB7A|HPX|IDE|PMM2|G6PC3|TP53|RAB5A|VPS26B|PDIA4|PPARG|IGF2BP1|BAX|PRKCI|FABP1|IFT122|ABCE1|HSPA9|FABP5|SLC7A13|CPSF2|VPS35|YWHAG|COMMD1|SNX32|PPARD|VAMP2|CLU|TCP1|APOL1|KIAA0196|LPA|SLC25A18|HGS|ATP6V0A2|HD…	202	1343|655|239|813|1435|629|1025|337|429|679|573|583|1265|737|1497|831|433|241|1041|475|479|1155|1101|861|667|1361|461|783|843|289|1085|963|1001|633|1493|1485|333|1245|865|1023|1385|661|459|693|1403|303|631|1367|1469|973|1105|1401|1467|1021|895|1191|565|855|501|313|911|331|1181|999|1187|559|949|493|1029|1545|525|463|397|1487|423|605|1061|1505|699|1017|981|639|519|1227|951|1099|923|319|1031|1015|539…	2.38e-09		GO:0071702	9002613615602687	0
168	27	KEGG Pathways		Tuberculosis	1.01e-07	MAPK1|NFKB1|PPP3R1|C3|RAF1|MAPK3|AKT3|RAB7A|RAB5A|BAX|HSPA9|CYCS|EEA1|ATP6V0A2|LAMP1|FCGR1A|IRAK1|SRC|AKT2|BAD|PPP3CB|PPP3CA|BCL2|KSR1|RELA|RHOA|AKT1	202	809|437|585|1445|241|933|273|633|1023|1403|973|873|1315|949|1355|407|945|815|877|1043|1363|1371|749|1375|389|1157|1231	2.3e-09		hsa05152	8995678626217357	0
17	12	Reactome Pathways		Platelet sensitization by LDL	1.01e-07	PPP2R5B|PPP2CB|APOB|PPP2R5A|PPP2R1B|PPP2R1A|PPP2R5E|PTPN11|PLA2G4A|PPP2R5C|PPP2R5D|PPP2CA	202	663|729|679|1349|1495|1163|1389|1285|1017|799|1135|379	4.05e-09		HSA-432142	8995678626217357	0
342	41	GO Biological Process		Response to hypoxia	1.03e-07	C12orf5|MMP2|PLAT|EGR1|PIN1|RAF1|CCNB1|MDM2|SLC6A4|DNMT3A|SRF|TP53|CCNA2|HK2|PSME3|FABP1|KCNK3|PPARD|PKM|P4HB|PKLR|EIF4EBP1|ATP7A|TGFBR2|MTOR|LMNA|IRAK1|SRC|TEK|SLC29A1|BAD|SLC11A2|MB|BCL2|RHOA|MYOCD|SLC2A1|LDHA|AKT1|MYC|CD24	202	1521|781|529|851|609|241|685|523|843|551|1223|865|979|727|229|631|1115|855|1471|1533|1419|901|591|1487|593|519|945|815|1215|553|1043|1507|1117|749|1157|755|243|971|1231|391|1175	2.47e-09		GO:0001666	8987162775294827	0
342	41	GO Biological Process		Regulation of MAP kinase activity	1.03e-07	DVL2|MAPK1|CSK|RAF1|APOE|KRAS|PDGFRB|MAP2K2|MAPK3|FGF2|EGF|ERBB2|EGFR|FLT1|APP|KIT|BRAF|IGFBP6|MAP2K1|IGF1|INSR|DVL3|F2R|PPP2R1A|HGS|PTPN11|IRAK1|SRC|SPRY2|PDCD10|CDK1|KSR1|TF|FGFR1|SHC1|HRAS|ARRB1|PPP2CA|LYN|NTRK1|CD24	202	431|809|1237|241|1041|317|557|821|933|1161|577|741|969|1387|361|723|1257|1293|409|1473|983|581|1127|1163|559|1285|945|815|1253|255|1449|1375|1189|1123|803|277|701|379|1111|467|1175	2.47e-09		GO:0043405	8987162775294827	0
29	14	Reactome Pathways		Activation of BH3-only proteins	1.06e-07	PPP3R1|YWHAH|AKT3|YWHAE|TP53|YWHAG|SFN|YWHAB|YWHAQ|AKT2|BAD|YWHAZ|BCL2|AKT1	202	585|831|273|1001|865|895|439|923|833|877|1043|1143|749|1231	4.34e-09		HSA-114452	897469413473523	0
78	20	Reactome Pathways		RNA Polymerase I Promoter Clearance	1.06e-07	MBD2|MAPK3|MTA2|H2AFZ|H2AFV|HIST1H2AJ|HIST2H2AC|HIST1H2AD|CHD4|GATAD2A|GATAD2B|RBBP4|HDAC1|HIST1H2AC|RBBP7|CHD3|HDAC2|H2AFX|H2AFJ|H2AFB1	202	1113|933|1459|349|839|789|1391|931|1351|617|1019|267|651|1009|929|1337|421|1145|1027|1243	4.33e-09		HSA-73854	897469413473523	0
260	35	Reactome Pathways		Platelet activation, signaling and aggregation	1.06e-07	APOH|MAPK1|CSK|SCG3|APOA1|RAF1|MAPK3|EGF|APP|ALB|IGF1|F2|GP6|PLG|CLU|F2R|LCK|PTPN11|FYN|PLA2G4A|SRC|PRKCZ|GRB2|YWHAZ|TF|IGF2|AHSG|RHOA|SHC1|ARRB2|PRKCA|ARRB1|SERPINA1|LYN|AKT1	202	239|809|1237|1169|583|241|933|577|361|515|1473|579|571|281|313|1127|915|1285|1509|1017|815|415|1271|1143|1189|401|939|1157|803|887|497|701|531|1111|1231	4.28e-09		HSA-76002	897469413473523	0
209	30	KEGG Pathways		Regulation of actin cytoskeleton	1.16e-07	MAPK1|RAF1|KRAS|PDGFRA|PDGFRB|MAP2K2|MAPK3|FGF2|EGF|EGFR|MYL9|BRAF|ARAF|FGFR4|MAP2K1|F2|F2R|PPP1CA|FGFR3|PPP1CC|NRAS|SRC|PPP1CB|MYH11|INS|PPP1R12A|FGFR1|RHOA|HRAS|FGFR2	202	809|241|317|509|557|821|933|1161|577|969|779|1257|819|807|409|579|1127|837|1323|881|1451|815|1277|1267|1457|1055|1123|1157|277|977	2.69e-08		hsa04810	8935542010773082	0
209	30	KEGG Pathways		Salmonella infection	1.16e-07	M6PR|MAPK1|NFKB1|SKP1|RAF1|MAP2K2|MAPK3|AKT3|RAB7A|RAB5A|MYL9|BAX|MAP2K1|CXCL8|CYCS|CTNNB1|ANXA2|AHNAK2|S100A10|IRAK1|AHNAK|AKT2|SNX9|BCL2|RELA|RHOA|HRAS|AKT1|MYC|RAB7B	202	1343|809|437|1195|241|821|933|273|633|1023|779|1403|409|301|873|989|521|1239|697|945|1011|877|1373|749|389|1157|277|1231|391|309	2.69e-08		hsa05132	8935542010773082	0
78	19	KEGG Pathways		B cell receptor signaling pathway	1.18e-07	MAPK1|NFKB1|PPP3R1|RAF1|KRAS|MAP2K2|MAPK3|AKT3|MAP2K1|GSK3B|NRAS|AKT2|GRB2|PPP3CB|PPP3CA|RELA|HRAS|LYN|AKT1	202	809|437|585|241|317|821|933|273|409|1177|1451|877|1271|1363|1371|389|277|1111|1231	2.8e-09		hsa04662	8928117992693874	0
439	47	GO Biological Process		Wound healing	1.24e-07	APOH|MAPK1|PLAT|FGFR1OP2|RAF1|PDGFRA|PDGFRB|MAPK3|KDR|FGF2|SRF|ERBB3|ERBB2|RAB5A|EGFR|MYL9|WNT3A|RHOC|F2|GP6|PLG|PPARD|F2R|LCK|PLAUR|PTPN11|FYN|MKL1|TGFBR2|MTOR|PABPC4|HDAC1|SRC|PDCD10|YWHAZ|INS|RHOA|ARRB2|PRKCA|ARRB1|FGFR2|SERPINE2|SERPINA1|LYN|HDAC2|ANXA8|EHD1	202	239|809|529|1125|241|509|557|933|371|1161|1223|715|741|1023|969|779|265|279|579|571|281|855|1127|915|329|1285|1509|1005|1487|593|955|651|815|255|1143|1457|1157|887|497|701|977|1141|531|1111|421|575|1081	2.99e-09		GO:0042060	8906578314837764	0
28	14	GO Biological Process		Carbohydrate phosphorylation	1.25e-07	GCK|PFKFB4|KHK|PFKL|FUK|HK2|HK3|PFKM|HKDC1|PFKFB2|PFKFB1|PFKP|HK1|PFKFB3	202	871|587|425|1095|853|727|567|1089|993|1319|1335|1535|1219|231	3.02e-09		GO:0046835	8903089986991943	0
574	55	GO Biological Process		Posttranscriptional regulation of gene expression	1.26e-07	PPP1R15A|MAPK1|AGO2|RPS6KB1|IGFBP5|TARDBP|FXR2|FUS|EIF2S1|CDK4|IGF2BP3|MAPK3|ERBB2|APP|GEMIN5|IGF2BP1|PSME3|EIF4A1|RPS6KB2|PABPC1|HNRNPM|PPP1CA|CAPRIN1|EIF4EBP1|ELAVL4|FXR1|EIF3B|MTOR|PPP1R15B|YTHDF1|FMR1|MKNK1|YBX1|SET|YWHAB|PABPC4|ATXN2|AKT2|YWHAZ|LARP4|DDX3X|ELAVL1|RHOA|TIA1|PRKCA|EIF4G1|NCK1|ANP32A|RXRA|EIF4E|LSM14A|DIO2|AKT1|UPF1|DCP1A	202	739|809|1097|337|1407|1107|1249|1199|765|1395|1101|933|741|361|495|693|229|1037|619|513|443|837|883|901|343|707|1065|593|1369|691|951|249|1099|563|923|955|359|877|1143|1167|1499|413|1157|1235|497|1397|517|1073|537|1201|927|1159|1231|959|761	3.05e-09		GO:0010608	8899629454882436	0
2371	141	GO Biological Process		Nervous system development	1.46e-07	DVL2|CTTNBP2|PPP2R5B|MAPK1|MICALL1|CSK|VTN|APOB|APOA1|C3|PIN1|STYXL1|YWHAH|APOE|KRAS|MDM2|IGF2BP3|COX17|LRP6|SLC6A4|CDH1|MAPK3|PAX8|STRN|YWHAE|FGF2|DNMT3A|PPP2R3A|SRF|ERBB3|RB1|NKD1|TP53|ERBB2|EGFR|WNT3A|APP|PPARG|FZD1|KIT|IGF2BP1|BAX|WNT1|PRKCI|IFT122|VPS35|MAP2K1|CTNNA1|KCNK3|YWHAG|F2|PPARD|MAPK7|CLU|DVL3|SUZ12|MET|KIAA0196|PRMT5|CXCR2|FZD2|ULK1|GSK3B|STK25|DENND5A|HDAC6|PPP1R17|CAPRIN1|WNT8B|M…	202	431|1137|663|809|813|1237|505|679|583|1445|609|711|831|1041|317|523|1101|991|1361|843|271|933|1527|793|1001|1161|551|1365|1223|715|787|867|865|741|969|265|361|459|503|723|693|1403|675|303|1367|1021|409|545|1115|895|579|855|1429|313|581|285|637|1181|941|909|817|1433|1177|1523|449|493|717|883|245|1297|1285|881|1151|989|591|1509|1003|393|275|1487|593|615|699|589|691|951|625|357|651|815|1411|247|1405…	3.55e-09		GO:0007399	8835647144215564	0
30	14	Reactome Pathways		Regulation of TP53 Activity through Acetylation	1.47e-07	PIN1|AKT3|TP53|MTA2|CHD4|GATAD2A|GATAD2B|RBBP4|HDAC1|RBBP7|CHD3|AKT2|HDAC2|AKT1	202	609|273|865|1459|1351|617|1019|267|651|929|1337|877|421|1231	6.18e-09		HSA-6804758	8832682665251823	0
851	70	GO Biological Process		Tube development	1.49e-07	DVL2|C12orf5|MAPK1|MMP2|APOB|IGFBP5|APOE|KRAS|CCNB1|PDGFRA|LRP6|PDGFRB|FLT4|MAPK3|PAX8|KDR|FGF2|EGF|SRF|RB1|RASA1|EGFR|FLT1|WNT3A|AKR1B1|FZD1|KIT|BAX|WNT1|LRP5|IFT122|MAP2K1|CXCL8|DVL3|MET|CXCR2|FZD2|PPP1CA|EIF4EBP1|FOXM1|CTNNB1|ATP7A|ANXA2|NKX2-1|TGFBR2|S100A7|SRC|AR|FOXE1|SPRY2|DVL1|TEK|PDCD10|GPC3|YWHAZ|THRB|BCL2|FGFR1|JMJD6|RHOA|SHC1|MYOCD|PRKCA|FGFR2|SERPINE2|EIF4E|STK3|AKT1|MYC|REC8	202	431|1521|809|781|679|1407|1041|317|685|509|1361|557|641|933|1527|371|1161|577|1223|787|1035|969|1387|265|769|503|723|1403|675|445|1367|409|301|581|637|909|817|837|901|713|989|591|521|1003|1487|1233|815|1197|1307|1253|1211|1215|255|287|1143|327|749|1123|351|1157|803|755|497|977|1141|1201|1439|1231|391|1213	3.65e-09		GO:0035295	8826813731587725	0
12	11	GO Biological Process		Fructose 6-phosphate metabolic process	1.56e-07	GFPT2|PFKL|HK2|HK3|TALDO1|PFKM|GFPT1|FBP2|PFKP|HK1|FBP1	202	1519|1095|727|567|1483|1089|1377|1255|1535|1219|647	3.83e-09		GO:0006002	8806875401645538	0
5023	247	GO Biological Process		Multicellular organism development	1.56e-07	DVL2|CTTNBP2|PPP2R5B|C12orf5|MAPK1|MICALL1|GNPNAT1|MMP2|CSK|AGO2|TG|VTN|CCND1|APOB|SNX17|IGFBP5|WDR77|APOA1|EGR1|ATP7B|GOT2|C3|PIN1|STYXL1|YWHAH|MYOD1|RAF1|APOE|KRAS|MBD2|CCNB1|SORT1|PDGFRA|CDK4|MDM2|IGF2BP3|COX17|LRP6|PPP2R3C|SLC6A4|CDH1|PDGFRB|FLT4|AXIN1|MAPK3|PAX8|STRN|KDR|TREH|YWHAE|CUL3|FGF2|DNMT3A|PPP2R3A|EGF|SRF|IDE|ERBB3|RB1|NKD1|TP53|ERBB2|CCNA2|RASA1|EGFR|FLT1|WNT3A|APP|AKR1B1|PPARG|FZD…	202	431|1137|663|1521|809|813|451|781|1237|1097|1417|505|377|679|573|1407|1393|583|851|1309|737|1445|609|711|831|1281|241|1041|317|1113|685|1155|509|1395|523|1101|991|1361|1379|843|271|557|641|1383|933|1527|793|371|1203|1001|1481|1161|551|1365|577|1223|1485|715|787|867|865|741|979|1035|969|1387|265|361|769|459|503|723|1257|693|727|807|1403|675|445|303|1367|973|1287|1021|409|1473|983|323|545|1491|1115…	3.84e-09		GO:0007275	8806875401645538	0
53	17	Reactome Pathways		snRNP Assembly	1.6e-08	SNRPD3|WDR77|SNRPF|GEMIN7|SNRPG|GEMIN6|GEMIN5|SNRPD1|GEMIN2|PRMT5|GEMIN4|SNRPD2|DDX20|GEMIN8|SNRPE|SNRPB|CLNS1A	202	773|1393|1421|527|417|1173|495|935|611|941|905|1119|1093|1529|763|795|1317	6.76e-09		HSA-191859	8795880017344075	0
53	17	Reactome Pathways		IGF1R signaling cascade	1.6e-08	KRAS|FGF2|FGFR4|IGF1|IRS1|FGFR3|PTPN11|NRAS|IRS4|IRS2|AKT2|GRB2|IGF2|FGFR1|SHC1|HRAS|FGFR2	202	317|1161|807|1473|453|1323|1285|1451|719|1411|877|1271|401|1123|803|277|977	6.76e-09		HSA-2428924	8795880017344075	0
13	11	Reactome Pathways		Chk1/Chk2(Cds1) mediated inactivation of Cyclin B:Cdk1 complex	1.6e-08	YWHAH|CCNB1|YWHAE|YWHAG|SFN|YWHAB|YWHAQ|CHEK2|CDK1|YWHAZ|CHEK1	202	831|685|1001|895|439|923|833|283|1449|1143|457	6.87e-09		HSA-75035	8795880017344075	0
872	71	GO Biological Process		Circulatory system development	1.62e-07	DVL2|MAPK1|MMP2|APOB|SNX17|EGR1|RAF1|APOE|MBD2|CCNB1|PDGFRA|MDM2|COX17|LRP6|PDGFRB|FLT4|MAPK3|PAX8|KDR|FGF2|EGF|SRF|ERBB3|RB1|TP53|ERBB2|RASA1|FLT1|WNT3A|PPARG|FZD1|BAX|LRP5|IFT122|MAP2K1|INSR|CXCL8|PLG|PPARD|FZD2|CALCA|PTPN11|ERBB4|FOXM1|CTNNB1|ATP7A|ANXA2|TGFBR2|MTOR|LMNA|S100A7|TEK|PDCD10|GPC3|PPP3CB|CDK1|YWHAZ|MYH11|MB|FKBP1A|FHL2|FGFR1|JMJD6|SHC1|MYOCD|PRKCA|FGFR2|RXRA|WNT8A|STK3|AKT1	202	431|809|781|679|573|851|241|1041|1113|685|509|523|991|1361|557|641|933|1527|371|1161|577|1223|715|787|865|741|1035|1387|265|459|503|1403|445|1367|409|983|301|281|855|817|849|1285|1151|713|989|591|521|1487|593|519|1233|1215|255|287|1363|1449|1143|1267|1117|743|305|1123|351|803|755|497|977|537|1207|1439|1231	4e-10		GO:0072359	8790484985457369	0
1313	93	GO Biological Process		Cell cycle	1.63e-07	PPP1R15A|MAPK1|RPS6KB1|CCND1|SKP1|PIN1|CCNA1|CCNB1|CDK4|MDM2|RBL2|MAPK3|SGOL1|YWHAE|CUL3|DNMT3A|RB1|TP53|CCNA2|RASA1|RHOC|WHAMM|BAX|PSME3|RAD21|PLK1|MAP2K1|BUB1|YWHAG|CXCL8|BANF1|MAPK7|KIAA0196|PPP2R1A|PPP2R2A|PPP1CA|CUL1|EIF4EBP1|PTPN11|SFN|ENSA|PPP1CC|FOXM1|CTNNB1|CCNG1|ANKLE2|MAX|VCP|MTOR|DCTN1|FGFR1OP|LMNA|CDC20|RBBP4|SRC|RBL1|MASTL|SPRY2|CHD3|CHEK2|PPP2R3B|SNX9|PBRM1|PPP3CA|CDK1|PPP1CB|PPME1…	202	739|809|337|377|1195|609|671|685|1395|523|1415|933|465|1001|1481|551|787|865|979|1035|279|1347|1403|229|1287|299|409|1511|895|301|1423|1429|1181|1163|879|837|925|901|1285|439|355|881|713|989|569|393|747|397|593|615|907|519|625|267|815|657|1295|1253|1337|283|1475|1373|1357|1371|1449|1277|1079|797|457|1055|845|1157|1453|1121|473|277|497|799|665|379|745|1201|1145|367|345|547|1209|959|385|391|1213|10…	4.05e-09		GO:0007049	8787812395596042	0
1231	89	GO Biological Process		Negative regulation of multicellular organismal process	1.68e-07	APOH|NUTF2|CSK|PLAT|VTN|NFKB1|APOC3|IGFBP5|WDR77|APOA1|HIST1H4F|PIN1|YWHAH|APOE|PDGFRA|MDM2|THOC1|SLC6A4|PAX8|FGF2|SRF|RB1|TP53|ERBB2|EGFR|WNT3A|APP|PPARG|LRP5|IFT122|HSPA9|IGF1|CTNNA1|F2|PLG|KLK3|F2R|TRIM25|GSK3B|DENND5A|HGS|CALCA|PLAUR|PTPN11|ERBB4|CTNNB1|ANXA2|NKX2-1|APOA4|TGFBR2|MTOR|APOA2|LMNA|APOM|ANXA1|SPRY2|DDX58|TEK|FKBP1B|PDCD10|G6PD|PPP3CA|ULK2|THRB|INS|BCL2|VIMP|FGFR1|AHSG|RHOA|SHC1|T…	202	239|629|1237|529|505|437|429|1407|1393|583|1131|609|831|1041|509|523|783|843|1527|1161|1223|787|865|741|969|265|361|459|445|1367|973|1473|545|579|281|257|1127|1057|1177|449|559|849|329|1285|1151|989|521|1003|463|1487|593|639|519|1015|1405|1253|1053|1215|643|255|1045|1371|913|327|1457|749|731|1123|939|1157|803|1235|755|887|473|701|1141|1329|379|1201|1111|1439|421|295|339|363|391|1175|1063	4.17e-09		GO:0051241	8774690718274136	0
562	54	GO Biological Process		Positive regulation of locomotion	1.7e-08	MAPK1|AGO2|VTN|IGFBP5|LGALS3|PDGFRA|MDM2|PDGFRB|FLT4|MAPK3|AKT3|KDR|FGF2|EGF|PLA2G7|EGFR|FLT1|APP|RHOC|KIT|VPS35|IGF1|INSR|CXCL8|PLG|MET|CXCR2|F2R|HDAC6|ATP7A|PTRF|TGFBR2|MTOR|FGFR1OP|S100A7|SRC|IRS2|ANXA1|SPRY2|TEK|AKT2|PDCD10|PPP3CA|INS|BCL2|TF|FGFR1|RHOA|GPI|HRAS|PRKCA|LYN|AKT1|CPNE3	202	809|1097|505|1407|1039|509|523|557|641|933|273|371|1161|577|1283|969|1387|361|279|723|1021|1473|983|301|281|637|909|1127|493|591|525|1487|593|907|1233|815|1411|1405|1253|1215|877|255|1371|1457|749|1189|1123|1157|1541|277|497|1111|1231|847	4.23e-09		GO:0040017	8769551078621726	0
289	37	GO Biological Process		Cell cycle phase transition	1.75e-07	RPS6KB1|CCND1|SKP1|CCNA1|CCNB1|CDK4|YWHAE|CUL3|RB1|CCNA2|PLK1|YWHAG|PPP2R1A|PPP2R2A|CUL1|EIF4EBP1|ENSA|FOXM1|CCNG1|MAX|DCTN1|FGFR1OP|MASTL|CHEK2|PPP3CA|CDK1|PPP1CB|PPME1|LCMT1|PPP1R12A|PPP2R2D|EIF4E|CDC27|ARPP19|UPF1|MYC|CTDP1	202	337|377|1195|671|685|1395|1001|1481|787|979|299|895|1163|879|925|901|355|713|569|747|615|907|1295|283|1371|1449|1277|1079|797|1055|845|1201|367|547|959|391|1063	4.37e-09		GO:0044770	8756961951313705	0
131	25	GO Biological Process		Regulation of protein localization to nucleus	1.75e-07	MAPK1|NUTF2|TARDBP|PIN1|CCT7|IPO5|CDH1|CCT6A|CCT5|APP|CCT8|CCT3|CCT2|PLK1|F2|TCP1|GSK3B|FYN|TFRC|LMNA|SRC|CCT4|CDK1|INS|AKT1	202	809|629|1107|609|1311|461|271|455|601|361|1261|347|1075|299|579|911|1177|1509|605|519|815|259|1449|1457|1231	4.39e-09		GO:1900180	8756961951313705	0
61	17	KEGG Pathways		Longevity regulating pathway - multiple species	1.75e-07	RPS6KB1|KRAS|AKT3|IGF1|INSR|IRS1|RPS6KB2|MTOR|NRAS|IRS4|HDAC1|IRS2|AKT2|INS|HRAS|HDAC2|AKT1	202	337|317|273|1473|983|453|619|593|1451|719|651|1411|877|1457|277|421|1231	4.22e-08		hsa04213	8756961951313705	0
681	60	Reactome Pathways		Cytokine Signaling in Immune system	1.93e-07	MAPK1|CTSG|MMP2|CSK|PPP2CB|NFKB1|CCND1|SKP1|EGR1|PIN1|KRAS|LMNB1|MAPK3|AKT3|FGF2|TP53|APP|PSME3|EIF4A1|ABCE1|HSPA9|MAP2K1|IRS1|CXCL8|MAPK7|PPP2R1B|MID1|VAMP2|TCP1|TALDO1|MMP1|TRIM25|PPP2R1A|CUL1|P4HB|LCK|PTPN11|ANXA2|FYN|FCGR1A|NRAS|IRAK1|IRS2|ANXA1|DDX58|AKT2|GRB2|YWHAZ|BCL2|RELA|SMARCA4|SHC1|HRAS|EIF4G1|PPP2R5D|PPP2CA|LYN|AKT1|YES1|MYC	202	809|1301|781|1237|729|437|377|1195|851|609|317|1259|933|273|1161|865|361|229|1037|1469|973|409|453|301|1429|1495|1503|501|911|1483|997|1057|1163|925|1533|915|1285|521|1509|407|1451|945|1411|1405|1053|877|1271|1143|749|389|635|803|277|1397|1135|379|1111|1231|1269|391	8.51e-09		HSA-1280215	8714442690992227	0
547	53	GO Biological Process		Positive regulation of cell motility	1.94e-07	MAPK1|AGO2|VTN|IGFBP5|LGALS3|PDGFRA|MDM2|PDGFRB|FLT4|MAPK3|AKT3|KDR|FGF2|EGF|PLA2G7|EGFR|FLT1|APP|RHOC|KIT|IGF1|INSR|CXCL8|PLG|MET|CXCR2|F2R|HDAC6|ATP7A|PTRF|TGFBR2|MTOR|FGFR1OP|S100A7|SRC|IRS2|ANXA1|SPRY2|TEK|AKT2|PDCD10|PPP3CA|INS|BCL2|TF|FGFR1|RHOA|GPI|HRAS|PRKCA|LYN|AKT1|CPNE3	202	809|1097|505|1407|1039|509|523|557|641|933|273|371|1161|577|1283|969|1387|361|279|723|1473|983|301|281|637|909|1127|493|591|525|1487|593|907|1233|815|1411|1405|1253|1215|877|255|1371|1457|749|1189|1123|1157|1541|277|497|1111|1231|847	4.88e-09		GO:2000147	8712198270069773	0
398	44	GO Biological Process		Regulation of translation	2.02e-07	PPP1R15A|MAPK1|AGO2|RPS6KB1|IGFBP5|TARDBP|FXR2|EIF2S1|CDK4|IGF2BP3|MAPK3|ERBB2|APP|GEMIN5|IGF2BP1|EIF4A1|RPS6KB2|PABPC1|PPP1CA|CAPRIN1|EIF4EBP1|FXR1|EIF3B|MTOR|PPP1R15B|YTHDF1|FMR1|MKNK1|YBX1|ATXN2|AKT2|LARP4|DDX3X|ELAVL1|RHOA|TIA1|EIF4G1|NCK1|RXRA|EIF4E|LSM14A|DIO2|AKT1|UPF1	202	739|809|1097|337|1407|1107|1249|765|1395|1101|933|741|361|495|693|1037|619|513|837|883|901|707|1065|593|1369|691|951|249|1099|359|877|1167|1499|413|1157|1235|1397|517|537|1201|927|1159|1231|959	5.09e-09		GO:0006417	8694648630553375	0
858	70	GO Biological Process		Response to lipid	2.03e-07	MAPK1|CTSG|PON1|NFKB1|CCND1|APOB|IGFBP2|YWHAH|MBD4|MYOD1|KRAS|MBD2|CCNB1|CDK4|MDM2|LRP6|SLC6A4|PDGFRB|MAPK3|DNMT3A|RB1|CCNA2|EGFR|WNT3A|PPARG|H2AFZ|IRS1|CXCL8|GLB1|PPARD|F2R|TRIM25|PAPPA|ATP4B|WNT8B|EIF4EBP1|CTNNB1|IGF2R|STRN3|TGFBR2|ACTA1|APOA2|S100A7|HTR1B|IRAK1|SRC|FABP3|AR|PFKFB1|ANXA1|RBBP7|FECH|RNF14|BAD|THRB|BCL2|VIMP|RELA|FHL2|RHOA|FGFR2|RXRA|EIF4E|WNT8A|LYN|HDAC2|AKT1|YES1|UPF1|PPP1R9B	202	809|1301|841|437|377|679|1427|831|599|1281|317|1113|685|1395|523|1361|843|557|933|551|787|979|969|265|459|349|453|301|1251|855|1127|1057|903|1463|245|901|989|483|613|1487|603|639|1233|1071|945|815|1031|1197|1335|1405|929|677|1013|1043|327|749|731|389|305|1157|977|537|1201|1207|1111|421|1231|1269|959|385	5.12e-09		GO:0033993	8692503962086787	0
449	47	GO Biological Process		Response to nutrient levels	2.37e-07	MAPK1|PON1|RPS6KB1|CCND1|IGFBP2|APOA1|MYOD1|APOE|G6PC|EIF2S1|MBD2|MDM2|SLC6A4|MAPK3|DNMT3A|SRF|SORD|TP53|EGFR|PPARG|ALB|PPARD|PKM|TRIM25|ULK1|EIF4EBP1|ENSA|MAX|TGFBR2|MTOR|NENF|SRC|PFKFB1|STK24|FKBP1B|G6PD|MST4|ULK2|BCL2|RELA|TBC1D5|EIF4G1|SLC2A1|HFE|NTRK1|LDHA|AKT1	202	809|841|337|377|1427|583|1281|1041|475|765|1113|523|843|933|551|1223|1543|865|969|459|515|855|1471|1057|1433|901|355|747|1487|593|827|815|1335|247|643|1045|399|913|749|389|721|1397|243|1329|467|971|1231	6.02e-09		GO:0031667	8625251653989896	0
18	12	GO Biological Process		High-density lipoprotein particle remodeling	2.57e-07	CETP|APOC3|APOA1|APOE|LCAT|ALB|APOA4|APOA2|APOM|PLTP|APOC1|APOC2	202	655|429|583|1041|963|515|463|639|1015|293|295|339	6.55e-09		GO:0034375	8590066876668706	0
47	16	Reactome Pathways		Cyclin D associated events in G1	2.66e-07	PPP2CB|CCND1|SKP1|CDK4|RBL2|RB1|PPP2R1B|PPP2R1A|PPP2R2A|CUL1|SRC|RBL1|PPP2R3B|CDKN1C|PPP2CA|LYN	202	729|377|1195|1395|1415|787|1495|1163|879|925|815|657|1475|665|379|1111	1.19e-08		HSA-69231	8575118363368933	0
32	14	Reactome Pathways		Plasma lipoprotein remodeling	2.66e-07	CETP|APOC3|APOB|APOA1|APOE|LCAT|ALB|LPA|APOA4|APOA2|APOF|PLTP|APOA5|APOC2	202	655|429|679|583|1041|963|515|999|463|639|621|293|689|339	1.21e-08		HSA-8963899	8575118363368933	0
265	35	GO Biological Process		Positive regulation of MAP kinase activity	2.68e-07	DVL2|MAPK1|CSK|RAF1|KRAS|PDGFRB|MAP2K2|MAPK3|FGF2|EGF|ERBB2|EGFR|FLT1|APP|KIT|BRAF|IGFBP6|MAP2K1|IGF1|INSR|DVL3|F2R|PTPN11|IRAK1|SRC|PDCD10|CDK1|KSR1|TF|FGFR1|SHC1|HRAS|ARRB1|NTRK1|CD24	202	431|809|1237|241|317|557|821|933|1161|577|741|969|1387|361|723|1257|1293|409|1473|983|581|1127|1285|945|815|255|1449|1375|1189|1123|803|277|701|467|1175	6.86e-09		GO:0043406	8571865205971211	0
45	16	GO Biological Process		NAD metabolic process	2.72e-07	GCK|ALDOC|ENO1|PFKL|HK2|HK3|ADPGK|PKM|ENO3|PKLR|PFKM|PFKP|HK1|GPI|ENO2|LDHA	202	871|1291|767|1095|727|567|1273|1471|1263|1419|1089|1535|1219|1541|1109|971	6.99e-09		GO:0019674	8565431095965801	0
218	30	KEGG Pathways		Shigellosis	2.73e-07	MAPK1|RPS6KB1|NFKB1|SKP1|C3|MDM2|MAPK3|AKT3|VDAC1|TP53|EGFR|MYL9|HK2|HK3|BAX|CXCL8|CYCS|RPS6KB2|GSK3B|CUL1|HKDC1|MTOR|MB21D1|SRC|AKT2|BCL2|RELA|RHOA|HK1|AKT1	202	809|337|437|1195|1445|523|933|273|967|865|969|779|727|567|1403|301|873|619|1177|925|993|593|561|815|877|749|389|1157|1219|1231	6.66e-08		hsa05131	8563837352959244	0
280	36	GO Biological Process		Mitotic cell cycle phase transition	2.8e-08	RPS6KB1|CCND1|SKP1|CCNA1|CCNB1|CDK4|YWHAE|CUL3|RB1|CCNA2|PLK1|YWHAG|PPP2R1A|PPP2R2A|CUL1|EIF4EBP1|ENSA|FOXM1|CCNG1|MAX|DCTN1|FGFR1OP|MASTL|CHEK2|PPP3CA|CDK1|PPP1CB|PPME1|LCMT1|PPP1R12A|PPP2R2D|EIF4E|CDC27|ARPP19|MYC|CTDP1	202	337|377|1195|671|685|1395|1001|1481|787|979|299|895|1163|879|925|901|355|713|569|747|615|907|1295|283|1371|1449|1277|1079|797|1055|845|1201|367|547|391|1063	7.22e-09		GO:0044772	8552841968657781	0
74	19	Reactome Pathways		Positive epigenetic regulation of rRNA expression	2.83e-07	MTA2|H2AFZ|H2AFV|GSK3B|HIST1H2AJ|HIST2H2AC|HIST1H2AD|CHD4|GATAD2A|GATAD2B|RBBP4|HDAC1|HIST1H2AC|RBBP7|CHD3|HDAC2|H2AFX|H2AFJ|H2AFB1	202	1459|349|839|1177|789|1391|931|1351|617|1019|267|651|1009|929|1337|421|1145|1027|1243	1.3e-09		HSA-5250913	854821356447571	0
74	19	Reactome Pathways		Extra-nuclear estrogen signaling	2.83e-07	MAPK1|MMP2|CCND1|KRAS|MAPK3|AKT3|STRN|EGF|SRF|EGFR|NRAS|SRC|PRKCZ|AKT2|BCL2|SHC1|PRMT1|HRAS|AKT1	202	809|781|377|317|933|273|793|577|1223|969|1451|815|415|877|749|803|473|277|1231	1.3e-09		HSA-9009391	854821356447571	0
1760	113	GO Biological Process		Tissue development	2.87e-07	DVL2|C12orf5|MAPK1|MMP2|MEST|VTN|ALDOC|CCND1|IGFBP5|WDR77|EGR1|MYOD1|LGALS3|KRAS|CCNB1|PDGFRA|CDK4|MDM2|LRP6|PDGFRB|MAPK3|PAX8|KDR|FGF2|PPP2R3A|EGF|VDAC1|SRF|ERBB3|RB1|TP53|EGFR|IGFBP1|WNT3A|RHOC|AKR1B1|PPARG|FZD1|WNT1|LRP5|IFT122|FABP5|MAP2K1|IGF1|INSR|PLG|PPARD|DVL3|MET|RBBP6|CXCR2|PKM|FZD2|ENO3|GSK3B|PPP1CA|FGFR3|SFN|ERBB4|CTNNB1|CTSB|ATP7A|NKX2-1|ASGR2|MKL1|TGFBR2|MTOR|ACTA1|LMNA|S100A7|IVL|Y…	202	431|1521|809|781|829|505|1291|377|1407|1393|851|1281|1039|317|685|509|1395|523|1361|557|933|1527|371|1161|1365|577|967|1223|715|787|865|969|1279|265|279|769|459|503|675|445|1367|1105|409|1473|983|281|855|581|637|471|909|1471|817|1263|1177|837|1323|439|1151|989|985|591|1003|441|1005|1487|593|603|519|1233|1069|1099|365|651|815|1197|1307|1405|1253|1211|877|1271|255|287|1371|1449|1267|327|749|743|389…	7.42e-09		GO:0009888	8542118103266008	0
2056	126	GO Biological Process		Gene expression	3.29e-07	APOH|SF3A1|SNRPD3|PAPOLA|CTSG|AGO2|PLAT|FBL|NFKB1|CCND1|WDR77|CPSF3|PAPOLG|TARDBP|ATP7B|HIST1H4F|SYMPK|APOE|PPP1R1B|FUS|LGALS3|EIF2S1|CCNB1|CDK4|IGF2BP3|THOC1|MAPK3|SMG6|PAX8|SRF|SNRPF|TP53|GEMIN7|SNRPG|EGFR|GEMIN6|APP|GEMIN5|PPARG|KIT|SSU72|BAX|EIF4A1|ABCE1|CPSF2|SNRPD1|KLK1|LSM3|RPS6KB2|GEMIN2|INTS6|PPARD|PABPC1|KLK2|KLK3|RBBP6|PRMT5|SNAPC5|GEMIN4|PPP2R1A|HNRNPM|INTS5|FIP1L1|HFE2|EIF4EBP1|SNRPD…	202	239|411|773|1513|1301|1097|529|1353|437|377|1393|1265|891|1107|1309|1131|1497|1041|751|1199|1039|765|685|1395|1101|783|933|1085|1527|1223|1421|865|527|417|969|1173|361|495|459|723|395|1403|1037|1469|1467|935|1431|233|619|611|1539|855|513|1275|257|471|941|1205|905|1163|443|541|1545|369|901|1119|1091|307|525|343|747|1065|921|1505|785|1093|951|1099|955|549|357|1197|687|1529|643|1241|1043|1357|1449|3…	8.52e-09		GO:0010467	8482804102050026	0
522	51	GO Biological Process		Positive regulation of cell migration	3.37e-07	MAPK1|AGO2|VTN|IGFBP5|LGALS3|PDGFRA|MDM2|PDGFRB|FLT4|MAPK3|AKT3|KDR|FGF2|EGF|PLA2G7|EGFR|FLT1|APP|RHOC|KIT|IGF1|INSR|CXCL8|PLG|MET|CXCR2|F2R|HDAC6|ATP7A|TGFBR2|MTOR|FGFR1OP|S100A7|SRC|IRS2|ANXA1|SPRY2|TEK|AKT2|PDCD10|PPP3CA|INS|BCL2|FGFR1|RHOA|GPI|HRAS|PRKCA|LYN|AKT1|CPNE3	202	809|1097|505|1407|1039|509|523|557|641|933|273|371|1161|577|1283|969|1387|361|279|723|1473|983|301|281|637|909|1127|493|591|1487|593|907|1233|815|1411|1405|1253|1215|877|255|1371|1457|749|1123|1157|1541|277|497|1111|1231|847	8.76e-09		GO:0030335	8472370099128661	0
129	24	Reactome Pathways		G1/S Transition	3.62e-07	PPP2CB|CCND1|SKP1|CCNA1|CCNB1|CDK4|RBL2|AKT3|RB1|CCNA2|PSME3|PPP2R1B|PPP2R1A|CUL1|MAX|RBBP4|HDAC1|RBL1|PPP2R3B|AKT2|CDK1|PPP2CA|AKT1|MYC	202	729|377|1195|671|685|1395|1415|273|787|979|229|1495|1163|925|747|267|651|657|1475|877|1449|379|1231|391	1.7e-09		HSA-69206	8441291429466835	0
118	22	KEGG Pathways		Growth hormone synthesis, secretion and action	3.84e-07	MAPK1|RAF1|KRAS|MAP2K2|MAPK3|AKT3|MAP2K1|IGF1|IRS1|GSK3B|MTOR|NRAS|IRS4|IRS2|IGFBP3|AKT2|GRB2|SHC1|HRAS|PRKCA|IGFALS|AKT1	202	809|241|317|821|933|273|409|1473|453|1177|593|1451|719|1411|1229|877|1271|803|277|497|1299|1231	9.48e-08		hsa04935	8415668775632469	0
1551	103	GO Biological Process		Generation of neurons	3.94e-07	DVL2|PPP2R5B|MAPK1|MICALL1|APOA1|C3|PIN1|STYXL1|YWHAH|APOE|MDM2|LRP6|SLC6A4|CDH1|MAPK3|STRN|YWHAE|DNMT3A|PPP2R3A|SRF|RB1|NKD1|TP53|ERBB2|EGFR|WNT3A|APP|PPARG|FZD1|KIT|BAX|WNT1|PRKCI|MAP2K1|CTNNA1|YWHAG|F2|MAPK7|DVL3|MET|KIAA0196|PRMT5|FZD2|ULK1|GSK3B|STK25|DENND5A|HDAC6|CAPRIN1|WNT8B|MAPT|PTPN11|PPP1CC|ERBB4|CTNNB1|ATP7A|FYN|NKX2-1|WDR5|MTOR|PARK2|S100A6|YTHDF1|FMR1|CDC20|HDAC1|SRC|IRS2|STK24|PRK…	202	431|663|809|813|583|1445|609|711|831|1041|523|1361|843|271|933|793|1001|551|1365|1223|787|867|865|741|969|265|361|459|503|723|1403|675|303|409|545|895|579|1429|581|637|1181|941|817|1433|1177|1523|449|493|883|245|1297|1285|881|1151|989|591|1509|1003|275|593|699|589|691|951|625|651|815|1411|247|415|1211|1479|643|1271|1363|1371|1507|1449|913|1143|327|749|389|1123|1157|803|473|497|977|1141|1397|517|1…	1.03e-08		GO:0048699	8404503778174426	0
376	42	GO Biological Process		Activation of protein kinase activity	4.04e-07	MAPK1|RAF1|CCNB1|PPP2R3C|AXIN1|MAP2K2|MAPK3|FGF2|EGF|ERBB3|EGFR|APP|KIT|BRAF|IGFBP6|MAP2K1|IGF1|INSR|F2R|STK25|CALCA|PTPN11|TGFBR2|MTOR|IRAK1|SRC|STK24|SPRY2|PRKCZ|MST4|CDK1|INS|KSR1|DDX3X|TF|IGF2|SHC1|ARRB1|STK3|NTRK1|AKT1|CD24	202	809|241|685|1379|1383|821|933|1161|577|715|969|361|723|1257|1293|409|1473|983|1127|1523|849|1285|1487|593|945|815|247|1253|415|399|1449|1457|1375|1499|1189|401|803|701|1439|467|1231|1175	1.06e-08		GO:0032147	8393618634889395	0
76	19	Reactome Pathways		Signaling by Insulin receptor	4.05e-07	MAPK1|KRAS|MAPK3|FGF2|FGFR4|INSR|IRS1|ATP6V0A2|FGFR3|PTPN11|NRAS|IRS2|AKT2|GRB2|INS|FGFR1|SHC1|HRAS|FGFR2	202	809|317|933|1161|807|983|453|949|1323|1285|1451|1411|877|1271|1457|1123|803|277|977	1.92e-08		HSA-74752	8392544976785331	0
74	19	GO Biological Process		Regulation of glucose transmembrane transport	4.95e-07	C3|BRAF|HK2|PRKCI|FABP5|IGF1|INSR|IRS1|PTPN11|OCLN|IRS2|AKT2|GPC3|INS|VIMP|SLC2A1|AKT1|ARPP19|YES1	202	1445|1257|727|303|1105|1473|983|453|1285|485|1411|877|287|1457|731|243|1231|547|1269	1.3e-09		GO:0010827	830539480106643	0
976	75	GO Biological Process		Cell cycle process	5.02e-07	PPP1R15A|RPS6KB1|CCND1|SKP1|CCNA1|CCNB1|CDK4|MDM2|RBL2|SGOL1|YWHAE|CUL3|RB1|TP53|CCNA2|RASA1|RHOC|WHAMM|BAX|RAD21|PLK1|MAP2K1|BUB1|YWHAG|CXCL8|BANF1|KIAA0196|PPP2R1A|PPP2R2A|CUL1|EIF4EBP1|SFN|ENSA|FOXM1|CTNNB1|CCNG1|ANKLE2|MAX|VCP|MTOR|DCTN1|FGFR1OP|LMNA|CDC20|MASTL|SPRY2|CHD3|CHEK2|PPP2R3B|SNX9|PPP3CA|CDK1|PPP1CB|PPME1|LCMT1|PPP1R12A|PPP2R2D|RHOA|CNEP1R1|PRMT1|HRAS|PRKCA|PPP2R5C|CDKN1C|PPP2CA|EI…	202	739|337|377|1195|671|685|1395|523|1415|465|1001|1481|787|865|979|1035|279|1347|1403|1287|299|409|1511|895|301|1423|1181|1163|879|925|901|439|355|713|989|569|393|747|397|593|615|907|519|625|1295|1253|1337|283|1475|1373|1371|1449|1277|1079|797|1055|845|1157|1121|473|277|497|799|665|379|1201|367|547|1209|959|385|391|1213|1063|943	1.32e-08		GO:0022402	829929628285498	0
132	23	KEGG Pathways		Apoptosis	5.04e-07	MAPK1|NFKB1|RAF1|KRAS|EIF2S1|LMNB1|MAP2K2|MAPK3|AKT3|TP53|BAX|MAP2K1|CYCS|CTSB|LMNA|NRAS|AKT2|BAD|BCL2|RELA|HRAS|NTRK1|AKT1	202	809|437|241|317|765|1259|821|933|273|865|1403|409|873|985|519|1451|877|1043|749|389|277|467|1231	1.26e-07		hsa04210	8297569463554474	0
396	43	GO Biological Process		RNA splicing	5.37e-07	SF3A1|SNRPD3|PAPOLA|WDR77|CPSF3|TARDBP|SYMPK|FUS|LGALS3|THOC1|SNRPF|GEMIN7|SNRPG|GEMIN6|GEMIN5|CPSF2|SNRPD1|LSM3|GEMIN2|PABPC1|PRMT5|GEMIN4|PPP2R1A|HNRNPM|FIP1L1|SNRPD2|PRMT7|PPP4R2|ELAVL4|DDX20|FMR1|YBX1|CSTF2|GEMIN8|SNRPN|ELAVL1|JMJD6|SNRPE|SNRPB|PPP2CA|CLNS1A|PPP1R9B|CPSF1	202	411|773|1513|1393|1265|1107|1497|1199|1039|783|1421|527|417|1173|495|1467|935|233|611|513|941|905|1163|443|1545|1119|1091|307|343|1093|951|1099|549|1529|1455|413|351|763|795|379|1317|385|965	1.42e-08		GO:0008380	8270025714300445	0
98	20	KEGG Pathways		AGE-RAGE signaling pathway in diabetic complications	5.56e-07	MAPK1|MMP2|NFKB1|CCND1|EGR1|KRAS|CDK4|MAPK3|AKT3|BAX|CXCL8|TGFBR2|NRAS|PRKCZ|AKT2|BCL2|RELA|HRAS|PRKCA|AKT1	202	809|781|437|377|851|317|1395|933|273|1403|301|1487|1451|415|877|749|389|277|497|1231	1.41e-07		hsa04933	8254925208417943	0
75	19	GO Biological Process		Regulation of plasma lipoprotein particle levels	5.97e-07	CETP|APOC3|APOB|APOA1|APOE|LCAT|PLA2G7|ALB|LPA|P4HB|APOA4|APOA2|APOM|PLTP|APOA5|APOC1|APOC2|APOC4|EHD1	202	655|429|679|583|1041|963|1283|515|999|1533|463|639|1015|293|689|295|339|649|1081	1.58e-08		GO:0097006	8224025668870631	0
85	20	GO Biological Process		Canonical Wnt signaling pathway	6.07e-07	DVL2|LRP6|AXIN1|EGF|RAB5A|WNT3A|FZD1|WNT1|LRP5|DVL3|FZD2|GSK3B|PPP1CA|WNT8B|CTNNB1|FRAT2|FRAT1|DVL1|CSNK1A1|WNT8A	202	431|1361|1383|577|1023|265|503|675|445|581|817|1177|837|245|989|311|321|1211|745|1207	1.61e-08		GO:0060070	8216811308924742	0
1061	79	GO Biological Process		Heterocycle biosynthetic process	6.16e-07	SNRPD3|MAPK1|PMM1|PAPOLA|GNPNAT1|NFKB1|CCND1|CPSF3|TARDBP|HIST1H4F|SYMPK|MBD4|GFPT2|PPP1R1B|CCNB1|CDK4|MAPK3|SMG6|PAX8|SRF|SNRPF|PMM2|TP53|SNRPG|PPARG|FUK|SSU72|FLAD1|BAX|GNPDA2|CPSF2|HINT1|INTS6|PPARD|MPI|PRMT5|SNAPC5|PKM|TRIM25|INTS5|FIP1L1|PKLR|PTRF|GFPT1|MAX|VCP|MTOR|SMG5|INTS7|YBX1|CSTF2|MTF1|AR|FECH|PBRM1|SLC11A2|CDK1|THRB|RELA|INTS1|SMARCA4|SNRPE|ARRB2|ARRB1|SNRPB|INTS2|DERA|PLTP|RXRA|GNPD…	202	773|809|1435|1513|451|437|377|1265|1107|1131|1497|599|1519|751|685|1395|933|1085|1527|1223|1421|333|865|417|459|853|395|373|1403|353|1467|387|1539|855|771|941|1205|1471|1057|541|1545|1419|525|1377|747|397|593|1505|785|1099|549|357|1197|677|1357|1507|1449|327|389|1153|635|763|887|701|795|1077|1517|293|537|595|1413|823|487|669|1321|705|885|1063|965	1.64e-08		GO:0018130	8210419287835574	0
351	40	GO Biological Process		Wnt signaling pathway	6.47e-07	DVL2|AGO2|CCND1|SKP1|PPP3R1|LRP6|AXIN1|STRN|CUL3|PPP2R3A|EGF|NKD1|RAB5A|WNT3A|FZD1|PSME3|WNT1|LRP5|VPS35|DVL3|FZD2|GSK3B|PPP1CA|CUL1|WNT8B|CTNNB1|FRAT2|FRAT1|VPS26A|DVL1|PPP3CB|PPP3CA|CTNND1|DDX3X|RHOA|ARRB2|CSNK1A1|WNT8A|VPS29|CD24	202	431|1097|377|1195|585|1361|1383|793|1481|1365|577|867|1023|265|503|229|675|445|1021|581|817|1177|837|925|245|989|311|321|319|1211|1363|1371|709|1499|1157|887|745|1207|253|1175	1.73e-08		GO:0016055	8189095719331301	0
440	45	Reactome Pathways		Signaling by Interleukins	6.47e-07	MAPK1|CTSG|MMP2|PPP2CB|NFKB1|CCND1|SKP1|LMNB1|MAPK3|FGF2|TP53|APP|PSME3|HSPA9|MAP2K1|IRS1|CXCL8|MAPK7|PPP2R1B|VAMP2|TCP1|TALDO1|MMP1|PPP2R1A|CUL1|P4HB|LCK|PTPN11|ANXA2|FYN|IRAK1|IRS2|ANXA1|GRB2|YWHAZ|BCL2|RELA|SMARCA4|SHC1|PPP2R5D|PPP2CA|LYN|AKT1|YES1|MYC	202	809|1301|781|729|437|377|1195|1259|933|1161|865|361|229|973|409|453|301|1429|1495|501|911|1483|997|1163|925|1533|915|1285|521|1509|945|1411|1405|1271|1143|749|389|635|803|1135|379|1111|1231|1269|391	3.1e-09		HSA-449147	8189095719331301	0
16	11	Reactome Pathways		Spry regulation of FGF signaling	6.79e-07	MAPK1|PPP2CB|MAPK3|BRAF|PPP2R1A|PTPN11|MKNK1|SRC|SPRY2|GRB2|PPP2CA	202	809|729|933|1257|1163|1285|249|815|1253|1271|379	3.28e-08		HSA-1295596	8168130225719498	0
15	11	GO Biological Process		Fructose metabolic process	7.44e-07	ALDOC|PFKFB4|KHK|SORD|AKR1B1|PFKFB2|PFKFB1|FBP2|GLYCTK|FBP1|PFKFB3	202	1291|587|425|1543|769|1319|1335|1255|995|647|231	2e-09		GO:0006000	812842706445412	0
15	11	GO Biological Process		Peptidyl-serine dephosphorylation	7.44e-07	PPP2CB|PPP2R1A|PPP2R2A|PPP1CA|PPP2R2C|PPP1R15B|PPP2R2B|PPP3CA|PPP2R2D|NCK1|PPP2CA	202	729|1163|879|837|325|1369|859|1371|845|517|379	2e-09		GO:0070262	812842706445412	0
119	23	GO Biological Process		Response to hydrogen peroxide	7.81e-07	PPP2CB|MDM2|PDGFRB|FABP1|MAPK7|STK25|HDAC6|FYN|HP|PPP1R15B|SRC|STK24|ANXA1|FKBP1B|PDCD10|MST4|BAD|CDK1|MB|BCL2|RELA|HDAC2|LDHA	202	729|523|557|631|1429|1523|493|1509|875|1369|815|247|1405|643|255|399|1043|1449|1117|749|389|421|971	2.12e-08		GO:0042542	81073489661227	0
97	21	GO Biological Process		Regulation of carbohydrate biosynthetic process	7.85e-07	GCK|NFKB1|EGF|PPP1R3A|IGF1|INSR|IRS1|GSK3B|PPP1CA|WDR5|MTOR|IRS2|AKT2|PPP1CB|INS|VIMP|IGF2|FBP1|AKT1|ARPP19|SMEK2	202	871|437|577|777|1473|983|453|1177|837|275|593|1411|877|1277|1457|731|401|647|1231|547|1489	2.13e-08		GO:0043255	8105130343254748	0
58	17	GO Biological Process		Positive regulation of cellular carbohydrate metabolic process	8.03e-07	C12orf5|GCK|IGF1|INSR|IRS1|WDR5|PFKFB2|SRC|PFKFB1|IRS2|AKT2|BAD|INS|IGF2|AKT1|ARPP19|SMEK2	202	1521|871|1473|983|453|275|1319|815|1335|1411|877|1043|1457|401|1231|547|1489	2.19e-08		GO:0010676	809528445472132	0
131	24	GO Biological Process		Transition metal ion homeostasis	8.21e-07	SKP1|ATP7B|SCO1|SLC31A2|SLC30A4|CP|HPX|FTH1|APP|COMMD1|CUL1|ATP6V0A2|HFE2|LCK|ATP7A|TFRC|PARK2|SLC31A1|SLC11A2|TF|HFE|TFR2|ATOX1|MYC	202	1195|1309|869|1359|375|1339|1493|405|361|1191|925|949|369|915|591|605|699|297|1507|1189|1329|435|269|391	2.24e-08		GO:0055076	8085656842880559	0
293	36	GO Biological Process		Regulation of protein stability	8.22e-07	MAPK1|APOA1|TARDBP|PIN1|KRAS|CCT7|MDM2|DERL1|CUL3|TP53|CCT6A|CCT5|CCT8|CCT3|VPS35|CCT2|PLK1|IGF1|CLU|DVL3|TCP1|LAMP1|HDAC6|ASGR2|PARK2|APOA2|LMNA|SRC|DVL1|CHEK2|PDCD10|CCT4|BCL2|CTNND1|TF|STK3	202	809|583|1107|609|317|1311|523|861|1481|865|455|601|1261|347|1021|1075|299|1473|313|581|911|1355|493|441|699|639|519|815|1211|283|255|259|749|709|1189|1439	2.25e-08		GO:0031647	8085128182459951	0
80	19	Reactome Pathways		Senescence-Associated Secretory Phenotype (SASP)	8.29e-07	MAPK1|NFKB1|CCNA1|CDK4|MAPK3|CCNA2|H2AFZ|CXCL8|H2AFV|MAPK7|HIST1H2AJ|HIST2H2AC|HIST1H2AD|HIST1H2AC|RELA|H2AFX|CDC27|H2AFJ|H2AFB1	202	809|437|671|1395|933|979|349|301|839|1429|789|1391|931|1009|389|1145|367|1027|1243	4.05e-08		HSA-2559582	8081445469449726	0
173	27	Reactome Pathways		Apoptosis	8.32e-07	MAPK1|PPP3R1|YWHAH|LMNB1|CDH1|MAPK3|AKT3|YWHAE|TP53|BAX|PSME3|YWHAG|CYCS|MAPT|SFN|CTNNB1|OCLN|LMNA|YWHAB|STK24|YWHAQ|AKT2|MST4|BAD|YWHAZ|BCL2|AKT1	202	809|585|831|1259|271|933|273|1001|865|1403|229|895|873|1297|439|989|485|519|923|247|833|877|399|1043|1143|749|1231	4.11e-08		HSA-109581	8079876673709275	0
52	16	Reactome Pathways		IRS-related events triggered by IGF1R	8.32e-07	KRAS|FGF2|FGFR4|IGF1|IRS1|FGFR3|PTPN11|NRAS|IRS4|IRS2|AKT2|GRB2|IGF2|FGFR1|HRAS|FGFR2	202	317|1161|807|1473|453|1323|1285|1451|719|1411|877|1271|401|1123|277|977	4.1e-09		HSA-2428928	8079876673709275	0
87	20	GO Biological Process		Positive regulation of phosphatidylinositol 3-kinase signaling	8.38e-07	PDGFRA|PDGFRB|KDR|ERBB3|FLT1|KIT|IGF1|INSR|F2|PPARD|F2R|ERBB4|FYN|SRC|IRS2|TEK|INS|FGFR1|LYN|NTRK1	202	509|557|371|715|1387|723|1473|983|579|855|1127|1151|1509|815|1411|1215|1457|1123|1111|467	2.3e-09		GO:0014068	8076755981369723	0
162	25	KEGG Pathways		cGMP-PKG signaling pathway	8.79e-07	MAPK1|PPP3R1|RAF1|MAP2K2|MAPK3|AKT3|VDAC1|SRF|MYL9|MAP2K1|INSR|IRS1|PPP1CA|PPP1CC|IRS4|IRS2|AKT2|BAD|PPP3CB|PPP3CA|PPP1CB|INS|PPP1R12A|RHOA|AKT1	202	809|585|241|821|933|273|967|1223|779|409|983|453|837|881|719|1411|877|1043|1363|1371|1277|1457|1055|1157|1231	2.25e-07		hsa04022	8056011124926228	0
29	13	Reactome Pathways		Negative regulation of FGFR3 signaling	8.84e-07	MAPK1|PPP2CB|MAPK3|FGF2|BRAF|PPP2R1A|FGFR3|PTPN11|MKNK1|SRC|SPRY2|GRB2|PPP2CA	202	809|729|933|1161|1257|1163|1323|1285|249|815|1253|1271|379	4.44e-08		HSA-5654732	8053547734986927	0
68	18	GO Biological Process		Positive regulation of striated muscle tissue development	9.53e-07	MAPK1|PIN1|MYOD1|CCNB1|FGF2|ERBB3|WNT3A|IGF1|MKL2|ERBB4|CTNNB1|MTOR|CDK1|BCL2|FGFR1|MYOCD|ARRB2|FGFR2	202	809|609|1281|685|1161|715|265|1473|1129|1151|989|593|1449|749|1123|755|887|977	2.63e-08		GO:0045844	8020907099361674	0
81	19	Reactome Pathways		Degradation of beta-catenin by the destruction complex	9.57e-07	PPP2R5B|PPP2CB|SKP1|PPP2R5A|AXIN1|PSME3|PPP2R1B|PPP2R1A|GSK3B|CUL1|PPP2R5E|CTNNB1|FRAT2|FRAT1|HDAC1|PPP2R5C|PPP2R5D|PPP2CA|CSNK1A1	202	663|729|1195|1349|1383|229|1495|1163|1177|925|1389|989|311|321|651|799|1135|379|745	4.85e-08		HSA-195253	8019088062223156	0
196	29	GO Biological Process		Regulation of mitochondrion organization	1.03e-06	C12orf5|PPP3R1|YWHAH|KDR|YWHAE|VDAC1|TP53|APP|HK2|BAX|VPS35|IGF1|YWHAG|CLU|GSK3B|HDAC6|PLAUR|MAPT|SFN|TFRC|PARK2|LMNA|YWHAB|YWHAQ|BAD|YWHAZ|BCL2|ARRB2|AKT1	202	1521|585|831|371|1001|967|865|361|727|1403|1021|1473|895|313|1177|493|329|1297|439|605|699|519|923|833|1043|1143|749|887|1231	2.84e-08		GO:0010821	7987162775294828	0
202	29	Reactome Pathways		Signaling by NOTCH	1.04e-06	AGO2|CCND1|SKP1|FLT4|EGF|TP53|EGFR|PSME3|PRKCI|H2AFZ|H2AFV|CUL1|HIST1H2AJ|HIST2H2AC|HDAC6|DLK1|HIST1H2AD|YBX1|HDAC1|HIST1H2AC|YWHAZ|ARRB2|ARRB1|HDAC2|H2AFX|H2AFJ|AKT1|MYC|H2AFB1	202	1097|377|1195|641|577|865|969|229|303|349|839|925|789|1391|493|1221|931|1099|651|1009|1143|887|701|421|1145|1027|1231|391|1243	5.34e-08		HSA-157118	798296666070122	0
995	75	GO Biological Process		Nucleobase-containing compound biosynthetic process	1.08e-06	SNRPD3|MAPK1|PMM1|PAPOLA|GNPNAT1|NFKB1|CCND1|CPSF3|TARDBP|HIST1H4F|SYMPK|MBD4|GFPT2|PPP1R1B|CCNB1|CDK4|MAPK3|SMG6|PAX8|SRF|SNRPF|PMM2|TP53|SNRPG|PPARG|FUK|SSU72|FLAD1|BAX|GNPDA2|CPSF2|HINT1|INTS6|PPARD|MPI|PRMT5|SNAPC5|PKM|TRIM25|INTS5|FIP1L1|PKLR|PTRF|GFPT1|MAX|VCP|SMG5|INTS7|YBX1|CSTF2|MTF1|AR|PBRM1|CDK1|THRB|RELA|INTS1|SMARCA4|SNRPE|ARRB2|ARRB1|SNRPB|INTS2|DERA|RXRA|GNPDA1|SMG7|INTS9|INTS8|INT…	202	773|809|1435|1513|451|437|377|1265|1107|1131|1497|599|1519|751|685|1395|933|1085|1527|1223|1421|333|865|417|459|853|395|373|1403|353|1467|387|1539|855|771|941|1205|1471|1057|541|1545|1419|525|1377|747|397|1505|785|1099|549|357|1197|1357|1449|327|389|1153|635|763|887|701|795|1077|1517|537|595|1413|823|487|669|1321|705|885|1063|965	3e-09		GO:0034654	7966576244513051	0
1584	103	GO Biological Process		RNA metabolic process	1.12e-06	SF3A1|SNRPD3|PAPOLA|AGO2|FBL|NFKB1|CCND1|WDR77|CPSF3|PAPOLG|TARDBP|HIST1H4F|SYMPK|PPP1R1B|FUS|LGALS3|CCNB1|CDK4|THOC1|MAPK3|SMG6|PAX8|SRF|SNRPF|TP53|GEMIN7|SNRPG|GEMIN6|APP|GEMIN5|PPARG|SSU72|BAX|CPSF2|SNRPD1|LSM3|GEMIN2|INTS6|PPARD|PABPC1|RBBP6|PRMT5|SNAPC5|GEMIN4|PPP2R1A|PPP2R2A|HNRNPM|INTS5|FIP1L1|MAPT|SNRPD2|PRMT7|SND1|PPP4R2|PTRF|ELAVL4|MAX|EDC4|SMG5|INTS7|DDX20|FMR1|YBX1|PABPC4|CSTF2|MTF1|A…	202	411|773|1513|1097|1353|437|377|1393|1265|891|1107|1131|1497|751|1199|1039|685|1395|783|933|1085|1527|1223|1421|865|527|417|1173|361|495|459|395|1403|1467|935|233|611|1539|855|513|471|941|1205|905|1163|879|443|541|1545|1297|1119|1091|987|307|525|343|747|1381|1505|785|1093|951|1099|955|549|357|1197|359|687|1529|1357|1449|327|1499|1455|389|1049|413|1153|351|635|763|887|701|795|1077|1397|379|537|1413…	3.13e-08		GO:0016070	7950781977329818	0
3450	182	GO Biological Process		Organelle organization	1.19e-06	MICALL1|PPP2CB|FBL|SKP1|PPP3R1|TARDBP|HIST1H4F|YWHAH|STRIP2|MYOD1|RAF1|APOE|SCO1|CCNA1|KRAS|EIF2S1|MBD2|CCNB1|SORT1|PDGFRA|DNAJC13|COX17|PPP2R3C|PDGFRB|RBL2|SRCAP|SMG6|SGOL1|AKT3|CTCF|YWHAE|CUL3|DNMT3A|RAB7A|SRF|IDE|RB1|TP53|CCNA2|MTA2|WHAMM|KIT|HK2|BAX|PRKCI|IFT122|H2AFZ|WDR82|HIST1H2AA|HSPA9|RAD21|VPS35|PLK1|LSM3|BUB1|COPRS|YWHAG|CYCS|H2AFV|HLTF|BANF1|MID1|VAMP2|CLU|SUZ12|EEA1|KIAA0196|PRMT5|F2…	202	813|729|1353|1195|585|1107|1131|831|481|1281|241|1041|869|671|317|765|1113|685|1155|509|667|991|1379|557|1415|499|1085|465|273|957|1001|1481|551|633|1223|1485|787|865|979|1459|1347|723|727|1403|303|1367|349|1313|1103|973|1287|1021|299|233|1511|323|895|873|839|235|1423|1503|501|313|285|1315|1181|941|1127|1433|1163|1177|879|1523|789|559|1391|949|493|1305|1297|439|931|1151|1091|989|591|521|1005|1351…	3.34e-08		GO:0006996	7924453038607469	0
360	40	GO Biological Process		Regulation of DNA metabolic process	1.22e-06	C12orf5|MAPK1|FUS|MBD2|CCT7|THOC1|PDGFRB|MAPK3|SMG6|FGF2|TP53|EGFR|CCT6A|PPP4C|CCT5|CCT8|PPARG|FGFR4|BAX|CCT3|CCT2|TCP1|PRMT5|FOXM1|CTNNB1|PPP4R2|TFRC|SMG5|LMNA|MB21D1|SRC|PPP1R10|CCT4|CHEK1|ARRB2|SMG7|H2AFX|AKT1|UPF1|MYC	202	1521|809|1199|1113|1311|783|557|933|1085|1161|865|969|455|775|601|1261|459|807|1403|347|1075|911|941|713|989|307|605|1505|519|561|815|539|259|457|887|1413|1145|1231|959|391	3.43e-08		GO:0051052	7913640169325251	0
198	29	GO Biological Process		Regulation of protein localization to membrane	1.25e-06	CSK|PPP3R1|YWHAH|PPFIA1|LGALS3|PPP2R5A|YWHAE|TP53|ERBB2|EGFR|WNT3A|PRKCI|YWHAG|SFN|FYN|PARK2|YWHAB|AR|PRKCZ|YWHAQ|AKT2|GPC3|BAD|YWHAZ|INS|BCL2|HRAS|AKT1|PPP1R9B	202	1237|585|831|479|1039|1349|1001|865|741|969|265|303|895|439|1509|699|923|1197|415|833|877|287|1043|1143|1457|749|277|1231|385	3.51e-08		GO:1905475	7903089986991944	0
164	26	Reactome Pathways		Cellular Senescence	1.25e-06	MAPK1|NFKB1|CCNA1|CDK4|MDM2|LMNB1|MAPK3|RB1|TP53|CCNA2|H2AFZ|CXCL8|H2AFV|MAPK7|SUZ12|HIST1H2AJ|HIST2H2AC|HIST1H2AD|RBBP4|HIST1H2AC|RBBP7|RELA|H2AFX|CDC27|H2AFJ|H2AFB1	202	809|437|671|1395|523|1259|933|787|865|979|349|301|839|1429|285|789|1391|931|267|1009|929|389|1145|367|1027|1243	6.44e-08		HSA-2559583	7903089986991944	0
1610	104	GO Biological Process		Cellular protein localization	1.27e-06	M6PR|DVL2|PPP1R15A|MICALL1|PMM1|NUTF2|SCG3|SNX8|SKP1|SNX17|CPSF3|SYMPK|YWHAH|APOE|SORT1|MDM2|DERL1|LRP6|IPO5|THOC1|CDH1|SNX1|SMG6|CTCF|YWHAE|RAB7A|IDE|RB1|PMM2|TP53|RAB5A|EGFR|VPS26B|WNT3A|BRAF|HK2|BAX|PRKCI|SLMAP|IFT122|ABCE1|HSPA9|RAD21|CPSF2|VPS35|PLK1|CTNNA1|YWHAG|MID1|VAMP2|CLU|KIAA0196|HGS|LAMP1|HDAC6|FIP1L1|CTNNB1|ANXA2|OCLN|VCP|SNX6|SMG5|PARK2|PEX3|LMNA|S100A10|SNX27|YBX1|YWHAB|VPS26A|PPP…	202	1343|431|739|813|1435|629|1169|1025|1195|573|1265|1497|831|1041|1155|523|861|1361|461|783|271|289|1085|957|1001|633|1485|787|333|865|1023|969|1385|265|1257|727|1403|303|623|1367|1469|973|1287|1467|1021|299|545|895|1503|501|313|1181|559|1355|493|1545|989|521|485|397|1061|1505|699|981|519|697|1227|1099|923|319|539|447|415|1211|533|833|877|1373|1043|1371|1449|1143|731|1499|413|1235|1219|721|1121|141…	3.58e-08		GO:0034613	7896196279044043	0
377	41	GO Biological Process		Positive regulation of proteolysis	1.3e-07	ENO1|APOE|MDM2|AXIN1|MAPK3|CUL3|EGF|RB1|WNT3A|APP|PPARG|FGFR4|BAX|PSME3|PLK1|CYCS|CLU|F2R|GSK3B|LCK|MAPT|FYN|VCP|PARK2|FMR1|CDC20|SRC|DVL1|SNX9|RNF14|BAD|SLC11A2|DDX3X|RHOA|ARRB1|CSNK1A1|LYN|HDAC2|CDC27|AKT1|MYC	202	767|1041|523|1383|933|1481|577|787|265|361|459|807|1403|229|299|873|313|1127|1177|915|1297|1509|397|699|951|625|815|1211|1373|1013|1043|1507|1499|1157|701|745|1111|421|367|1231|391	3.7e-09		GO:0045862	7886056647693163	0
3757	194	GO Biological Process		Cellular developmental process	1.31e-06	DVL2|PPP2R5B|C12orf5|MAPK1|MICALL1|MMP2|CSK|FBL|VTN|ALDOC|CCND1|IGFBP5|WDR77|APOA1|EGR1|C3|PIN1|STYXL1|YWHAH|MYOD1|RAF1|APOE|LGALS3|KRAS|CCNB1|SORT1|PDGFRA|MDM2|DNAJC13|LRP6|SLC6A4|CDH1|PDGFRB|SNX1|RBL2|MAPK3|PAX8|STRN|KDR|YWHAE|CUL3|FGF2|DNMT3A|PPP2R3A|VDAC1|SRF|ERBB3|RB1|NKD1|TP53|ERBB2|RASA1|EGFR|FLT1|WNT3A|APP|AKR1B1|PPARG|FZD1|KIT|BAX|WNT1|LRP5|PRKCI|HSPA9|MAP2K1|IGF1|CTNNA1|YWHAG|F2|PLG|PPA…	202	431|663|1521|809|813|781|1237|1353|505|1291|377|1407|1393|583|851|1445|609|711|831|1281|241|1041|1039|317|685|1155|509|523|667|1361|843|271|557|289|1415|933|1527|793|371|1001|1481|1161|551|1365|967|1223|715|787|867|865|741|1035|969|1387|265|361|769|459|503|723|1403|675|445|303|973|409|1473|545|895|579|281|855|1429|313|581|285|637|1181|941|817|1433|1177|1523|449|493|915|1129|1323|1221|883|245|1297…	3.72e-08		GO:0048869	7882728704344235	0
116	22	Reactome Pathways		Epigenetic regulation of gene expression	1.37e-06	MBD2|DNMT3A|MTA2|H2AFZ|H2AFV|SUZ12|GSK3B|HIST1H2AJ|HIST2H2AC|HIST1H2AD|CHD4|GATAD2A|GATAD2B|RBBP4|HDAC1|HIST1H2AC|RBBP7|CHD3|HDAC2|H2AFX|H2AFJ|H2AFB1	202	1113|551|1459|349|839|285|1177|789|1391|931|1351|617|1019|267|651|1009|929|1337|421|1145|1027|1243	7.15e-08		HSA-212165	7863279432843593	0
983	74	GO Biological Process		Negative regulation of developmental process	1.48e-06	CETP|APOH|MAPK1|CCND1|IGFBP5|WDR77|HIST1H4F|YWHAH|APOE|KRAS|SORT1|MDM2|THOC1|SLC6A4|PAX8|AKT3|RB1|NKD1|TP53|ERBB2|EGFR|WNT3A|APP|PPARG|WNT1|LRP5|IFT122|HSPA9|IGF1|CTNNA1|F2|PPARD|KLK3|SUZ12|PRMT5|GSK3B|DENND5A|HGS|CALCA|FGFR3|MAPT|PTPN11|ERBB4|FOXM1|CTNNB1|ANXA2|NKX2-1|TGFBR2|TFRC|PARK2|YBX1|RBL1|ANXA1|SPRY2|TEK|PDCD10|G6PD|PPP3CA|ULK2|THRB|BCL2|AHSG|RHOA|SHC1|MYOCD|PRMT1|PPP2CA|EIF4E|LYN|STK3|HD…	202	655|239|809|377|1407|1393|1131|831|1041|317|1155|523|783|843|1527|273|787|867|865|741|969|265|361|459|675|445|1367|973|1473|545|579|855|257|285|941|1177|449|559|849|1323|1297|1285|1151|713|989|521|1003|1487|605|699|1099|657|1405|1253|1215|255|1045|1371|913|327|749|939|1157|803|755|473|379|1201|1111|1439|421|363|391|1063	4.21e-08		GO:0051093	7829738284605042	0
865	68	GO Biological Process		Regulation of cell migration	1.51e-06	APOH|MAPK1|AGO2|VTN|IGFBP5|APOE|LGALS3|PDGFRA|MDM2|CDH1|PDGFRB|FLT4|MAPK3|AKT3|KDR|FGF2|EGF|SRF|PLA2G7|EGFR|MTA2|FLT1|APP|RHOC|PPARG|KIT|IGF1|INSR|CXCL8|PLG|PPARD|MET|CXCR2|F2R|HDAC6|ERBB4|ATP7A|NKX2-1|TGFBR2|MTOR|FGFR1OP|LMNA|S100A7|SRC|IRS2|STK24|ANXA1|SPRY2|DDX58|TEK|IGFBP3|AKT2|PDCD10|MST4|PPP3CA|INS|BCL2|FGFR1|RHOA|MYOCD|GPI|HRAS|PRKCA|SERPINE2|NCK1|LYN|AKT1|CPNE3	202	239|809|1097|505|1407|1041|1039|509|523|271|557|641|933|273|371|1161|577|1223|1283|969|1459|1387|361|279|459|723|1473|983|301|281|855|637|909|1127|493|1151|591|1003|1487|593|907|519|1233|815|1411|247|1405|1253|1053|1215|1229|877|255|399|1371|1457|749|1123|1157|755|1541|277|497|1141|517|1111|1231|847	4.31e-08		GO:0030334	782102305270683	0
567	52	GO Biological Process		Transcription, DNA-templated	1.58e-06	SNRPD3|PAPOLA|NFKB1|CCND1|CPSF3|TARDBP|HIST1H4F|SYMPK|PPP1R1B|CCNB1|CDK4|MAPK3|PAX8|SRF|SNRPF|TP53|SNRPG|PPARG|SSU72|BAX|CPSF2|INTS6|PPARD|PRMT5|SNAPC5|INTS5|FIP1L1|PTRF|MAX|INTS7|YBX1|CSTF2|MTF1|AR|PBRM1|CDK1|THRB|RELA|INTS1|SMARCA4|SNRPE|ARRB2|ARRB1|SNRPB|INTS2|RXRA|INTS9|INTS8|INTS4|CPSF3L|CTDP1|CPSF1	202	773|1513|437|377|1265|1107|1131|1497|751|685|1395|933|1527|1223|1421|865|417|459|395|1403|1467|1539|855|941|1205|541|1545|525|747|785|1099|549|357|1197|1357|1449|327|389|1153|635|763|887|701|795|1077|537|823|487|669|705|1063|965	4.54e-08		GO:0006351	7801342913045578	0
6933	312	GO Biological Process		Multicellular organismal process	1.58e-06	DVL2|CTTNBP2|PPP2R5B|C12orf5|CETP|APOH|MAPK1|MICALL1|CTSG|GNPNAT1|MMP2|CSK|AGO2|TG|PLAT|FBL|VTN|CCND1|APOC3|APOB|SNX17|IGFBP2|IGFBP5|WDR77|APOA1|EGR1|ATP7B|GOT2|C3|PIN1|STYXL1|YWHAH|MYOD1|RAF1|APOE|G6PC|PPP1R1B|CCNA1|KRAS|MBD2|CCNB1|SORT1|PDGFRA|CDK4|MDM2|IGF2BP3|DNAJC13|COX17|LRP6|PPP2R3C|SLC6A4|CDH1|PDGFRB|FLT4|AXIN1|MAPK3|PAX8|STRN|KDR|LCAT|TREH|LCT|YWHAE|SI|CUL3|FGF2|DNMT3A|PPP2R3A|AMBP|EGF|T…	202	431|1137|663|1521|655|239|809|813|1301|451|781|1237|1097|1417|529|1353|505|377|429|679|573|1427|1407|1393|583|851|1309|737|1445|609|711|831|1281|241|1041|475|751|671|317|1113|685|1155|509|1395|523|1101|667|991|1361|1379|843|271|557|641|1383|933|1527|793|371|963|1203|1087|1001|1149|1481|1161|551|1365|1083|577|1059|967|1223|1485|715|787|867|865|741|1023|979|1035|1283|969|779|1387|265|361|769|459|50…	4.53e-08		GO:0032501	7801342913045578	0
1684	107	GO Biological Process		Small molecule metabolic process	1.6e-07	CETP|MAPK1|PMM1|GNPNAT1|PON1|GCK|ALDOC|PFKFB4|APOB|SNX17|ENO1|APOA1|TTR|FAAH|LIPE|GOT2|C3|MBD4|APOE|GFPT2|G6PC|KHK|MAPK3|LCAT|FGF2|VDAC1|SORD|PMM2|G6PC3|PFKL|GALM|PLA2G7|APP|AKR1B1|PPARG|FUK|HK2|FLAD1|HK3|LRP5|GNPDA2|FABP5|IGF1|GUSB|HINT1|GLB1|PPARD|ADPGK|APOL1|MPI|PKM|TALDO1|ENO3|PKLR|ATP7A|PFKM|HKDC1|GFPT1|APOA4|ITIH2|VCP|AKR1B10|PRSS3|MTOR|PFKFB2|PLA2G4A|APOA2|TKTL1|PGM1|FABP3|PFKFB1|FBP2|G6PC…	202	655|809|1435|451|841|871|1291|587|679|573|767|583|1303|825|863|737|1445|599|1041|1519|475|425|933|963|1161|967|1543|333|1245|1095|1289|1283|361|769|459|853|727|373|567|445|353|1105|1473|1051|387|1251|855|1273|331|771|1471|1483|1263|1419|591|1089|993|1377|463|1139|397|733|921|593|1319|1017|639|1183|757|1031|1335|1255|897|1411|961|1535|801|877|1045|1043|1457|621|383|995|1007|401|1123|1157|1219|1541…	4.61e-08		GO:0044281	7795880017344075	0
317	37	GO Biological Process		Regulation of neuron death	1.61e-06	C12orf5|EGR1|PIN1|APOE|KRAS|EIF2S1|ERBB3|TP53|RASA1|WNT3A|APP|FZD1|BAX|WNT1|PRKCI|VPS35|CLU|F2R|GSK3B|MAPT|CTNNB1|FYN|MTOR|SNX6|PARK2|NENF|SET|G6PD|BAD|BCL2|RHOA|ARRB2|HRAS|ARRB1|EIF4G1|NTRK1|AKT1	202	1521|851|609|1041|317|765|715|865|1035|265|361|503|1403|675|303|1021|313|1127|1177|1297|989|1509|593|1061|699|827|563|1045|1043|749|1157|887|277|701|1397|467|1231	4.65e-08		GO:1901214	779317412396815	0
94	19	KEGG Pathways		Progesterone-mediated oocyte maturation	1.61e-06	MAPK1|RAF1|CCNA1|KRAS|CCNB1|MAPK3|AKT3|CCNA2|BRAF|ARAF|PLK1|MAP2K1|BUB1|IGF1|AKT2|CDK1|INS|CDC27|AKT1	202	809|241|671|317|685|933|273|979|1257|819|299|409|1511|1473|877|1449|1457|367|1231	4.16e-07		hsa04914	779317412396815	0
31	13	Reactome Pathways		Negative regulation of FGFR4 signaling	1.62e-06	MAPK1|PPP2CB|MAPK3|FGF2|BRAF|FGFR4|PPP2R1A|PTPN11|MKNK1|SRC|SPRY2|GRB2|PPP2CA	202	809|729|933|1161|1257|807|1163|1285|249|815|1253|1271|379	8.5e-09		HSA-5654733	7790484985457369	0
2139	127	GO Biological Process		Protein localization	1.67e-06	M6PR|DVL2|PPP1R15A|MICALL1|PMM1|NUTF2|SCG3|SNX8|SKP1|APOB|SNX17|CPSF3|SYMPK|YWHAH|SNX4|RAF1|APOE|SORT1|MDM2|DERL1|DNAJC13|LRP6|IPO5|THOC1|CDH1|SNX1|SMG6|CTCF|YWHAE|RAB7A|IDE|RB1|PMM2|TP53|RAB5A|EGFR|VPS26B|WNT3A|PDIA4|PPARG|BRAF|HK2|BAX|PRKCI|SLMAP|IFT122|ABCE1|HSPA9|RAD21|CPSF2|VPS35|PLK1|CTNNA1|YWHAG|COMMD1|SNX32|MID1|VAMP2|CLU|TCP1|KIAA0196|ULK1|HGS|ATP6V0A2|LAMP1|HDAC6|FIP1L1|CTNNB1|ANXA2|OCL…	202	1343|431|739|813|1435|629|1169|1025|1195|679|573|1265|1497|831|433|241|1041|1155|523|861|667|1361|461|783|271|289|1085|957|1001|633|1485|787|333|865|1023|969|1385|265|661|459|1257|727|1403|303|623|1367|1469|973|1287|1467|1021|299|545|895|1191|565|1503|501|313|911|1181|1433|559|949|1355|493|1545|989|521|485|525|397|423|605|1061|1505|699|981|519|697|1227|1099|923|319|539|1405|447|415|1211|533|643|8…	4.87e-08		GO:0008104	7777283528852417	0
125	23	GO Biological Process		Carbohydrate biosynthetic process	1.69e-06	ST6GALNAC1|ALDOC|ENO1|GOT2|G6PC|SORD|G6PC3|AKR1B1|TALDO1|ENO3|PGM1|PFKFB1|FBP2|G6PC2|PGM2|AKT2|G6PD|TKT|GPI|FBP1|SLC2A1|ENO2|AKT1	202	681|1291|767|737|475|1543|1245|769|1483|1263|757|1335|1255|897|801|877|1045|1007|1541|647|243|1109|1231	4.95e-08		GO:0016051	7772113295386326	0
258	33	GO Biological Process		Regulation of peptidyl-tyrosine phosphorylation	1.74e-06	DVL2|PPP2R5B|VTN|PDGFRB|EGF|HPX|ERBB3|TP53|EGFR|WNT3A|APP|KIT|IGF1|PPP2R1A|FGFR3|PTPN11|ERBB4|FYN|MTOR|SNX6|FGFR1OP|FCGR1A|SRC|PRKCZ|SH3BP5|IGF2|SHC1|ARRB2|PPP2CA|LYN|HDAC2|YES1|CD24	202	431|663|505|557|577|1493|715|865|969|265|361|723|1473|1163|1323|1285|1151|1509|593|1061|907|407|815|415|735|401|803|887|379|1111|421|1269|1175	5.09e-08		GO:0050730	77594507517174	0
415	43	GO Biological Process		Regulation of protein catabolic process	1.83e-06	PIN1|APOE|SCO1|MDM2|CDH1|SNX1|AXIN1|CUL3|PPP2R3A|RAB7A|EGF|IDE|RB1|NKD1|EGFR|APP|ARAF|PSME3|WNT1|VPS35|PLK1|COMMD1|CLU|GSK3B|HGS|ANXA2|FYN|VCP|PARK2|FMR1|CDC20|DVL1|CHEK2|SNX9|GPC3|RNF14|INS|RELA|SERPINE2|HFE|CSNK1A1|CDC27|AKT1	202	609|1041|869|523|271|289|1383|1481|1365|633|577|1485|787|867|969|361|819|229|675|1021|299|1191|313|1177|559|521|1509|397|699|951|625|1211|283|1373|287|1013|1457|389|1141|1329|745|367|1231	5.38e-08		GO:0042176	773754891026957	0
114	22	GO Biological Process		Regulation of DNA biosynthetic process	1.83e-06	MAPK1|CCT7|PDGFRB|MAPK3|SMG6|FGF2|TP53|CCT6A|CCT5|CCT8|PPARG|FGFR4|CCT3|CCT2|TCP1|CTNNB1|SMG5|SRC|CCT4|ARRB2|SMG7|MYC	202	809|1311|557|933|1085|1161|865|455|601|1261|459|807|347|1075|911|989|1505|815|259|887|1413|391	5.36e-08		GO:2000278	773754891026957	0
103	21	GO Biological Process		Positive regulation of endocytosis	1.88e-06	VTN|C3|APOE|EGF|WNT3A|APP|PPARG|INSR|CLU|ANXA2|FMR1|GPC3|PPP3CA|TF|TBC1D5|ARRB2|ARRB1|HFE|TFR2|APOA5|ANKFY1	202	505|1445|1041|577|265|361|459|983|313|521|951|287|1371|1189|721|887|701|1329|435|689|753	5.55e-08		GO:0045807	7725842150736321	0
107	21	Reactome Pathways		Post-translational protein phosphorylation	1.92e-06	SCG3|APOB|IGFBP5|APOA1|C3|APOE|CP|IGFBP4|IGFBP1|APP|ALB|APOL1|P4HB|ITIH2|APOA2|IGFBP3|GPC3|TF|AHSG|SERPINA1|APOA5	202	1169|679|1407|583|1445|1041|1339|335|1279|361|515|331|1533|1139|639|1229|287|1189|939|531|689	1.01e-07		HSA-8957275	7716698771296451	0
2310	134	GO Biological Process		Response to external stimulus	2.05e-06	UNC13D|MAPK1|CTSG|PON1|RPS6KB1|NFKB1|CCND1|APOB|IGFBP2|ENO1|APOA1|EGR1|C3|MYOD1|RAF1|APOE|G6PC|LGALS3|EIF2S1|MBD2|CCNB1|PDGFRA|CDK4|MDM2|SLC6A4|PDGFRB|MAPK3|FGF2|DNMT3A|SRF|SORD|ASGR1|TP53|ERBB2|EGFR|CCT5|VPS26B|FLT1|WNT3A|APP|PPARG|KIT|ALB|ABCE1|MAP2K1|CXCL8|F2|BANF1|PPARD|MAPK7|MID1|KLK3|CLU|MET|APOL1|CXCR2|PKM|F2R|TRIM25|ULK1|PPP1CA|CALCA|ATP4B|PLAUR|EIF4EBP1|PTPN11|ENSA|PPP1CC|ATP7A|FYN|NKX2-…	202	1461|809|1301|841|337|437|377|679|1427|767|583|851|1445|1281|241|1041|475|1039|765|1113|685|509|1395|523|843|557|933|1161|551|1223|1543|403|865|741|969|601|1385|1387|265|361|459|723|515|1469|409|301|579|1423|855|1429|1503|257|313|637|331|909|1471|1127|1057|1433|837|849|1463|329|901|1285|355|881|591|1509|1003|875|463|747|1487|423|921|593|603|699|827|1233|407|945|561|951|815|1335|1411|247|1405|1211…	6.08e-08		GO:0009605	7688246138944246	0
468	46	GO Biological Process		mRNA processing	2.15e-06	SF3A1|SNRPD3|PAPOLA|WDR77|CPSF3|PAPOLG|TARDBP|SYMPK|FUS|LGALS3|THOC1|SNRPF|GEMIN7|SNRPG|GEMIN6|APP|GEMIN5|SSU72|CPSF2|SNRPD1|LSM3|GEMIN2|PABPC1|RBBP6|PRMT5|GEMIN4|HNRNPM|FIP1L1|SNRPD2|PRMT7|PPP4R2|ELAVL4|DDX20|FMR1|YBX1|CSTF2|GEMIN8|SNRPN|PAPOLB|ELAVL1|JMJD6|SNRPE|SNRPB|CLNS1A|H2AFB1|CPSF1	202	411|773|1513|1393|1265|891|1107|1497|1199|1039|783|1421|527|417|1173|361|495|395|1467|935|233|611|513|471|941|905|443|1545|1119|1091|307|343|1093|951|1099|549|1529|1455|1049|413|351|763|795|1317|1243|965	6.37e-08		GO:0006397	7667561540084395	0
1095	79	GO Biological Process		Regulation of anatomical structure morphogenesis	2.19e-06	DVL2|APOH|UNC13D|AGO2|APOA1|C3|YWHAH|STRIP2|MYOD1|APOE|FLT4|PAX8|AKT3|KDR|FGF2|PPP2R3A|SRF|NKD1|ERBB2|RASA1|FLT1|WNT3A|PPARG|FZD1|KIT|HK2|BAX|PSME3|WNT1|VPS35|MAP2K1|CXCL8|F2|MAPK7|KLK3|DVL3|CXCR2|PKM|FZD2|GSK3B|STK25|P4HB|HGS|CAPRIN1|MAPT|CTNNB1|FYN|TGFBR2|TFRC|MTOR|PARK2|S100A10|STRIP1|YTHDF1|ANXA7|SRC|AR|ANXA1|SPRY2|DVL1|TEK|PDCD10|GPC3|PPP3CA|ULK2|THRB|BCL2|LARP4|FGFR1|RHOA|SHC1|ARRB2|PRKCA|F…	202	431|239|1461|1097|583|1445|831|481|1281|1041|641|1527|273|371|1161|1365|1223|867|741|1035|1387|265|459|503|723|727|1403|229|675|1021|409|301|579|1429|257|581|909|1471|817|1177|1523|1533|559|883|1297|989|1509|1487|605|593|699|697|1185|691|365|815|1197|1405|1253|1211|1215|255|287|1371|913|327|749|1167|1123|1157|803|887|497|977|537|467|1537|1081|391	6.51e-08		GO:0022603	7659555885159881	0
83	19	GO Biological Process		Regulation of telomere maintenance	2.32e-06	MAPK1|CCT7|MAPK3|SMG6|CCT6A|CCT5|CCT8|CCT3|CCT2|TCP1|CTNNB1|SMG5|LMNA|SRC|PPP1R10|CCT4|SMG7|UPF1|MYC	202	809|1311|933|1085|455|601|1261|347|1075|911|989|1505|519|815|539|259|1413|959|391	6.9e-09		GO:0032204	7634512015109101	0
760	62	GO Biological Process		Regulation of cell cycle process	2.37e-06	PPP2R5B|CCND1|SKP1|PIN1|CCNB1|CDK4|MDM2|PDGFRB|RBL2|CTCF|YWHAE|CUL3|EGF|RB1|TP53|EGFR|APP|BAX|PSME3|LRP5|RAD21|PLK1|BUB1|IGF1|INSR|YWHAG|SUZ12|PRMT5|MLXIPL|PPP2R1A|CUL1|SFN|FOXM1|CTNNB1|SND1|MAX|DCTN1|FGFR1OP|CDC20|RBBP4|RBL1|PPP1R10|ANXA1|RBBP7|CHEK2|AKT2|CDK1|INS|BCL2|LCMT1|DDX3X|CHEK1|IGF2|FGFR1|RHOA|FBXO43|PRMT1|PPP2R5C|EIF4G1|CDC27|AKT1|PPP1R9B	202	663|377|1195|609|685|1395|523|557|1415|957|1001|1481|577|787|865|969|361|1403|229|445|1287|299|1511|1473|983|895|285|941|683|1163|925|439|713|989|987|747|615|907|625|267|657|539|1405|929|283|877|1449|1457|749|797|1499|457|401|1123|1157|1453|473|799|1397|367|1231|385	7.09e-08		GO:0010564	7625251653989896	0
666	57	GO Biological Process		Positive regulation of programmed cell death	2.37e-06	C12orf5|PPP3R1|PIN1|STYXL1|YWHAH|EIF2S1|SORT1|CDK4|PDGFRB|YWHAE|TP53|WNT3A|APP|PPARG|BAX|PRKCI|CTNNA1|YWHAG|CYCS|PPP2R1B|CLU|CXCR2|F2R|PPP2R1A|GSK3B|PPP1CA|HDAC6|LCK|PLAUR|MAPT|SFN|CTNNB1|IGF2R|VCP|DDX20|YWHAB|SRC|ANXA1|IGFBP3|YWHAQ|CHEK2|BAD|SLC11A2|YWHAZ|BCL2|DDX3X|RHOA|TIA1|ARRB2|ARRB1|NCK1|LYN|STK3|NTRK1|LDHA|AKT1|MYC	202	1521|585|609|711|831|765|1155|1395|557|1001|865|265|361|459|1403|303|545|895|873|1495|313|909|1127|1163|1177|837|493|915|329|1297|439|989|483|397|1093|923|815|1405|1229|833|283|1043|1507|1143|749|1499|1157|1235|887|701|517|1111|1439|467|971|1231|391	7.08e-08		GO:0043068	7625251653989896	0
116	22	GO Biological Process		Regulation of lipid transport	2.38e-06	CETP|PON1|NFKB1|APOC3|APOA1|APOE|EGF|PPARG|PTPN11|ANXA2|APOA4|PARK2|APOA2|FABP3|IRS2|AKT2|PLTP|DBI|APOA5|AKT1|APOC1|APOC2	202	655|841|437|429|583|1041|577|459|1285|521|463|699|639|1031|1411|877|293|419|689|1231|295|339	7.15e-08		GO:0032368	7623423042943488	0
659	56	Reactome Pathways		Metabolism of RNA	2.4e-07	SF3A1|SNRPD3|PAPOLA|FBL|WDR77|CPSF3|SYMPK|FUS|IGF2BP3|THOC1|SMG6|SNRPF|GEMIN7|SNRPG|GEMIN6|GEMIN5|IGF2BP1|PSME3|EIF4A1|CPSF2|SNRPD1|LSM3|GEMIN2|PABPC1|PRMT5|GEMIN4|PPP2R1A|PPP2R2A|HNRNPM|FIP1L1|SNRPD2|EDC4|SMG5|DDX20|YBX1|SET|YWHAB|CSTF2|RIOK1|GEMIN8|YWHAZ|SNRPN|ELAVL1|SNRPE|PRKCA|SNRPB|EIF4G1|ANP32A|PPP2CA|SMG7|CLNS1A|AKT1|UPF1|DCP1A|DDX6|CPSF1	202	411|773|1513|1353|1393|1265|1497|1199|1101|783|1085|1421|527|417|1173|495|693|229|1037|1467|935|233|611|513|941|905|1163|879|443|1545|1119|1381|1505|1093|1099|563|923|549|687|1529|1143|1455|413|763|497|795|1397|1073|379|1413|1317|1231|959|761|363|965	1.28e-07		HSA-8953854	7619788758288394	0
205	29	GO Biological Process		Regulation of endocytosis	2.41e-06	VTN|APOC3|SNX17|C3|APOE|LGALS3|EGF|WNT3A|APP|PPARG|INSR|CLU|ANXA2|FMR1|SRC|ATXN2|GPC3|PPP3CB|PPP3CA|TF|TBC1D5|ARRB2|ARRB1|HFE|TFR2|APOA5|ANKFY1|APOC1|APOC2	202	505|429|573|1445|1041|1039|577|265|361|459|983|313|521|951|815|359|287|1363|1371|1189|721|887|701|1329|435|689|753|295|339	7.25e-08		GO:0030100	7617982957425131	0
269	33	Reactome Pathways		Cell Cycle Checkpoints	2.46e-06	PPP2R5B|PPP2CB|YWHAH|CCNA1|CCNB1|MDM2|PPP2R5A|SGOL1|YWHAE|TP53|CCNA2|PSME3|PLK1|BUB1|YWHAG|PPP2R1B|PPP2R1A|PPP2R5E|SFN|PPP1CC|CDC20|YWHAB|YWHAQ|CHEK2|CDK1|YWHAZ|CHEK1|PPP2R5C|PPP2R5D|PPP2CA|H2AFX|CDC27|MIS12	202	663|729|831|671|685|523|1349|465|1001|865|979|229|299|1511|895|1495|1163|1389|439|881|625|923|833|283|1449|1143|457|799|1135|379|1145|367|943	1.33e-07		HSA-69620	7609064892896621	0
649	56	GO Biological Process		Regulation of peptide transport	2.53e-06	MAPK1|NUTF2|CSK|GCK|PPP3R1|TARDBP|YWHAH|APOE|MDM2|IPO5|CDH1|PAX8|YWHAE|TP53|ERBB2|PFKL|EGFR|APP|LRP5|VPS35|IGF1|IRS1|YWHAG|PPARD|VAMP2|F2R|GSK3B|PTPN11|SFN|ENSA|FYN|PARK2|PFKFB2|YWHAB|SRC|G6PC2|IRS2|FKBP1B|YWHAQ|AKT2|PDCD10|BAD|PPP3CB|PPP3CA|CDK1|YWHAZ|INS|BCL2|GPI|HRAS|PRKCA|ARRB1|SLC2A1|HFE|TFR2|LYN	202	809|629|1237|871|585|1107|831|1041|523|461|271|1527|1001|865|741|1095|969|361|445|1021|1473|453|895|855|501|1127|1177|1285|439|355|1509|699|1319|923|815|897|1411|643|833|877|255|1043|1363|1371|1449|1143|1457|749|1541|277|497|701|243|1329|435|1111	7.65e-08		GO:0090087	7596879478824182	0
918	70	GO Biological Process		Apoptotic process	2.6e-07	C12orf5|PPP1R15A|MAPK1|GZMH|PPP2CB|RPS6KB1|NFKB1|RAF1|SORT1|THOC1|AXIN1|MAPK3|CUL3|DNMT3A|VDAC1|ERBB3|RB1|TP53|APP|HK2|BAX|PSME3|LRP5|RAD21|VPS35|BUB1|HINT1|CYCS|PPARD|PPP2R1B|CLU|PPP2R1A|GSK3B|STK25|CUL1|LAMP1|FGFR3|SFN|ERBB4|FXR1|MAX|TGFBR2|MTOR|TIAL1|STK24|IGFBP3|CHEK2|AKT2|PDCD10|MST4|PPP2R2B|BAD|CDK1|THRB|BCL2|DDX3X|CHEK1|TIA1|HRAS|PRKCA|ARRB1|FGFR2|PPP2R5C|PPP2CA|STK3|RABEP1|AKT1|MYC|XKR5|C…	202	1521|739|809|1341|729|337|437|241|1155|783|1383|933|1481|551|967|715|787|865|361|727|1403|229|445|1287|1021|1511|387|873|855|1495|313|1163|1177|1523|925|1355|1323|439|1151|707|747|1487|593|237|247|1229|283|877|255|399|859|1043|1449|327|749|1499|457|1235|277|497|701|977|799|379|1439|791|1231|391|1217|1175	7.88e-08		GO:0006915	7585026652029182	0
293	35	GO Biological Process		Cellular response to chemical stress	2.61e-06	MAPK1|MMP2|EIF2S1|PDGFRA|MDM2|PDGFRB|MAPK3|TP53|CCNA2|EGFR|AKR1B1|PPARG|FABP1|CYCS|MAPK7|STK25|HDAC6|MAPT|ATP7A|APOA4|SRC|STK24|ANXA1|PDCD10|G6PD|SLC11A2|CDK1|BCL2|VIMP|DDX3X|RELA|SLC2A1|HDAC2|CCS|AKT1	202	809|781|765|509|523|557|933|865|979|969|769|459|631|873|1429|1523|493|1297|591|463|815|247|1405|255|1045|1507|1449|749|731|1499|389|243|421|1165|1231	7.93e-08		GO:0062197	7583359492661719	0
9	9	Reactome Pathways		MASTL Facilitates Mitotic Progression	2.7e-07	PPP2CB|CCNB1|PPP2R1B|PPP2R1A|MASTL|CDK1|PPP2R2D|PPP2CA|ARPP19	202	729|685|1495|1163|1295|1449|845|379|547	1.47e-07		HSA-2465910	7568636235841013	0
31	13	GO Biological Process		Protein-lipid complex assembly	2.79e-06	APOC3|APOB|APOA1|APOE|P4HB|APOA4|APOA2|APOM|SNX9|APOA5|APOC1|APOC2|APOC4	202	429|679|583|1041|1533|463|639|1015|1373|689|295|339|649	8.5e-09		GO:0065005	7554395796726403	0
33	13	Reactome Pathways		Negative regulation of FGFR1 signaling	2.84e-06	MAPK1|PPP2CB|MAPK3|FGF2|BRAF|PPP2R1A|PTPN11|MKNK1|SRC|SPRY2|GRB2|FGFR1|PPP2CA	202	809|729|933|1161|1257|1163|1285|249|815|1253|1271|1123|379	1.57e-07		HSA-5654726	7546681659952962	0
66	16	KEGG Pathways		Fc epsilon RI signaling pathway	2.91e-06	MAPK1|RAF1|KRAS|MAP2K2|MAPK3|AKT3|MAP2K1|FYN|PLA2G4A|NRAS|AKT2|GRB2|HRAS|PRKCA|LYN|AKT1	202	809|241|317|821|933|273|409|1509|1017|1451|877|1271|277|497|1111|1231	7.62e-07		hsa04664	7536107011014093	0
406	42	GO Biological Process		Transcription by RNA polymerase II	2.94e-06	SNRPD3|PAPOLA|NFKB1|CCND1|CPSF3|TARDBP|SYMPK|CCNB1|CDK4|SRF|SNRPF|SNRPG|PPARG|SSU72|BAX|CPSF2|INTS6|PPARD|SNAPC5|INTS5|FIP1L1|MAX|INTS7|YBX1|CSTF2|AR|PBRM1|CDK1|THRB|INTS1|SNRPE|ARRB2|ARRB1|SNRPB|INTS2|RXRA|INTS9|INTS8|INTS4|CPSF3L|CTDP1|CPSF1	202	773|1513|437|377|1265|1107|1497|685|1395|1223|1421|417|459|395|1403|1467|1539|855|1205|541|1545|747|785|1099|549|1197|1357|1449|327|1153|763|887|701|795|1077|537|823|487|669|705|1063|965	8.98e-08		GO:0006366	7531652669587843	0
509	48	GO Biological Process		Regulation of body fluid levels	3.08e-06	APOH|MAPK1|PLAT|VTN|CCND1|ATP7B|GOT2|RAF1|APOE|PDGFRA|MAPK3|TRPV5|SRF|RAB5A|MYL9|WNT3A|AKR1B1|HK2|F2|GP6|PLG|MET|F2R|LCK|PLAUR|PTPN11|SFN|ERBB4|ATP7A|ANXA2|FYN|PLA2G4A|PABPC4|ANXA7|HDAC1|SRC|SLC29A1|YWHAZ|ARRB2|GPI|PRKCA|ARRB1|SERPINE2|SERPINA1|LYN|HDAC2|ANXA8|EHD1	202	239|809|529|505|377|1309|737|241|1041|509|933|1059|1223|1023|779|265|769|727|579|571|281|637|1127|915|329|1285|439|1151|591|521|1509|1017|955|365|651|815|553|1143|887|1541|497|701|1141|531|1111|421|575|1081	9.45e-08		GO:0050878	7511449283499556	0
118	22	GO Biological Process		Import into nucleus	3.08e-06	SNRPD3|NUTF2|IPO5|SNRPF|TP53|GEMIN7|SNRPG|GEMIN6|GEMIN5|SNRPD1|GEMIN2|GEMIN4|SNRPD2|LMNA|DDX20|PPP1R10|GEMIN8|PPP3CA|ELAVL1|SNRPE|SNRPB|AKT1	202	773|629|461|1421|865|527|417|1173|495|935|611|905|1119|519|1093|539|1529|1371|413|763|795|1231	9.48e-08		GO:0051170	7511449283499556	0
142	24	GO Biological Process		Lipid homeostasis	3.08e-06	CETP|APOC3|APOB|APOA1|APOE|G6PC|LCAT|PPARG|FGFR4|LRP5|MLXIPL|ASGR2|APOA4|APOA2|FABP3|IRS2|APOM|INS|DDX3X|APOA5|APOC2|APOC4|EHD1|CD24	202	655|429|679|583|1041|475|963|459|807|445|683|441|463|639|1031|1411|1015|1457|1499|689|339|649|1081|1175	9.47e-08		GO:0055088	7511449283499556	0
13	10	GO Biological Process		Triglyceride-rich lipoprotein particle remodeling	3.18e-06	CETP|APOC3|APOB|APOA1|APOE|LCAT|APOA4|APOA2|APOA5|APOC2	202	655|429|679|583|1041|963|463|639|689|339	9.83e-08		GO:0034370	7497572880015567	0
75	18	GO Biological Process		Positive regulation of lipase activity	3.27e-06	APOH|APOA1|PDGFRA|PDGFRB|FGF2|EGFR|FLT1|RHOC|KIT|FGFR3|APOA4|PRKCZ|FGFR1|RHOA|HRAS|FGFR2|APOA5|APOC2	202	239|583|509|557|1161|969|1387|279|723|1323|463|415|1123|1157|277|977|689|339	1.01e-07		GO:0060193	7485452247339713	0
99	19	KEGG Pathways		Chagas disease	3.3e-07	MAPK1|PPP2CB|NFKB1|C3|MAPK3|AKT3|CXCL8|PPP2R1B|PPP2R1A|PPP2R2A|PPP2R2C|TGFBR2|IRAK1|AKT2|PPP2R2B|RELA|PPP2R2D|PPP2CA|AKT1	202	809|729|437|1445|933|273|301|1495|1163|879|325|1487|945|877|859|389|845|379|1231	8.74e-07		hsa05142	7481486060122113	0
359	39	GO Biological Process		Regulation of chromosome organization	3.32e-06	MAPK1|CCNB1|CCT7|MAPK3|SMG6|CTCF|CUL3|RB1|TP53|CCT6A|CCT5|APP|CCT8|CCT3|RAD21|CCT2|PLK1|BUB1|TCP1|MAPT|CTNNB1|WDR5|SMG5|LMNA|FMR1|CDC20|SET|SRC|PPP1R10|CCT4|LCMT1|CHEK1|IGF2|MYOCD|ARRB1|SMG7|CDC27|UPF1|MYC	202	809|685|1311|933|1085|957|1481|787|865|455|601|361|1261|347|1287|1075|299|1511|911|1297|989|275|1505|519|951|625|563|815|539|259|797|457|401|755|701|1413|367|959|391	1.03e-07		GO:0033044	7478861916295964	0
1211	84	GO Biological Process		Organic cyclic compound biosynthetic process	3.34e-06	SNRPD3|MAPK1|PMM1|PAPOLA|GNPNAT1|NFKB1|CCND1|APOA1|CPSF3|TARDBP|HIST1H4F|SYMPK|MBD4|GFPT2|PPP1R1B|CCNB1|CDK4|MAPK3|SMG6|PAX8|SRF|SNRPF|PMM2|TP53|SNRPG|AKR1B1|PPARG|FUK|SSU72|FLAD1|BAX|GNPDA2|CPSF2|HINT1|INTS6|PPARD|MPI|PRMT5|SNAPC5|PKM|TRIM25|INTS5|FIP1L1|PKLR|PTRF|GFPT1|APOA4|MAX|VCP|MTOR|SMG5|INTS7|YBX1|CSTF2|MTF1|AR|FECH|G6PD|PBRM1|SLC11A2|CDK1|THRB|RELA|INTS1|SMARCA4|SNRPE|ARRB2|ARRB1|SNRPB|I…	202	773|809|1435|1513|451|437|377|583|1265|1107|1131|1497|599|1519|751|685|1395|933|1085|1527|1223|1421|333|865|417|769|459|853|395|373|1403|353|1467|387|1539|855|771|941|1205|1471|1057|541|1545|1419|525|1377|463|747|397|593|1505|785|1099|549|357|1197|677|1045|1357|1507|1449|327|389|1153|635|763|887|701|795|1077|1517|293|537|595|1413|823|487|669|1321|705|689|885|1063|965	1.04e-07		GO:1901362	7476253533188435	0
67	16	KEGG Pathways		Adherens junction	3.39e-06	MAPK1|CDH1|MAPK3|ERBB2|EGFR|INSR|CTNNA1|MET|CTNNB1|FYN|TGFBR2|SRC|CTNND1|FGFR1|RHOA|YES1	202	809|271|933|741|969|983|545|637|989|1509|1487|815|709|1123|1157|1269	9.16e-07		hsa04520	7469800301796917	0
48	14	KEGG Pathways		Cholesterol metabolism	3.39e-06	CETP|APOH|APOC3|APOB|APOA1|APOE|SORT1|LCAT|VDAC1|LPA|APOA4|APOA2|PLTP|APOC1	202	655|239|429|679|583|1041|1155|963|967|999|463|639|293|295	9.08e-07		hsa04979	7469800301796917	0
149	23	KEGG Pathways		Oxytocin signaling pathway	3.58e-06	MAPK1|CCND1|PPP3R1|RAF1|KRAS|MAP2K2|MAPK3|EGFR|MYL9|MAP2K1|MAPK7|PPP1CA|PPP1CC|PLA2G4A|NRAS|SRC|PPP3CB|PPP3CA|PPP1CB|PPP1R12A|RHOA|HRAS|PRKCA	202	809|377|585|241|317|821|933|969|779|409|1429|837|881|1017|1451|815|1363|1371|1277|1055|1157|277|497	9.8e-08		hsa04921	7446116973356125	0
34	13	Reactome Pathways		Signalling to ERKs	3.76e-06	MAPK1|KRAS|MAP2K2|MAPK3|BRAF|MAP2K1|NRAS|YWHAB|SRC|GRB2|SHC1|HRAS|NTRK1	202	809|317|821|933|1257|409|1451|923|815|1271|803|277|467	2.1e-08		HSA-187687	7424812155072339	0
34	13	Reactome Pathways		Negative regulation of FGFR2 signaling	3.76e-06	MAPK1|PPP2CB|MAPK3|FGF2|BRAF|PPP2R1A|PTPN11|MKNK1|SRC|SPRY2|GRB2|FGFR2|PPP2CA	202	809|729|933|1161|1257|1163|1285|249|815|1253|1271|977|379	2.1e-08		HSA-5654727	7424812155072339	0
136	23	Reactome Pathways		RHO GTPases Activate Formins	3.76e-06	DVL2|PPP2R5B|PPP2CB|PPP2R5A|SGOL1|SRF|RHOC|PLK1|BUB1|PPP2R1B|DVL3|PPP2R1A|PPP2R5E|PPP1CC|MKL1|CDC20|SRC|DVL1|RHOA|PPP2R5C|PPP2R5D|PPP2CA|MIS12	202	431|663|729|1349|465|1223|279|299|1511|1495|581|1163|1389|881|1005|625|815|1211|1157|799|1135|379|943	2.1e-08		HSA-5663220	7424812155072339	0
66	17	GO Biological Process		Regulation of lipid kinase activity	3.77e-06	PDGFRA|PPP2R5A|PDGFRB|RBL2|FGF2|RB1|FLT1|APP|KIT|IRS1|F2|FGFR3|ERBB4|SRC|RBL1|TEK|LYN	202	509|1349|557|1415|1161|787|1387|361|723|453|579|1323|1151|815|657|1215|1111	1.18e-07		GO:0043550	7423658649794207	0
108	21	GO Biological Process		Cellular transition metal ion homeostasis	3.77e-06	SKP1|ATP7B|SCO1|SLC31A2|CP|HPX|FTH1|APP|CUL1|ATP6V0A2|HFE2|LCK|ATP7A|TFRC|SLC31A1|SLC11A2|TF|HFE|TFR2|ATOX1|MYC	202	1195|1309|869|1359|1339|1493|405|361|925|949|369|915|591|605|297|1507|1189|1329|435|269|391	1.18e-07		GO:0046916	7423658649794207	0
32	12	KEGG Pathways		Starch and sucrose metabolism	3.8e-07	GCK|G6PC|TREH|SI|G6PC3|HK2|HK3|HKDC1|G6PC2|PGM2|HK1|GPI	202	871|475|1203|1149|1245|727|567|993|897|801|1219|1541	1.05e-06		hsa00500	742021640338319	0
1070	77	GO Biological Process		Aromatic compound biosynthetic process	3.9e-07	SNRPD3|MAPK1|PMM1|PAPOLA|GNPNAT1|NFKB1|CCND1|CPSF3|TARDBP|HIST1H4F|SYMPK|MBD4|GFPT2|PPP1R1B|CCNB1|CDK4|MAPK3|SMG6|PAX8|SRF|SNRPF|PMM2|TP53|SNRPG|PPARG|FUK|SSU72|FLAD1|BAX|GNPDA2|CPSF2|HINT1|INTS6|PPARD|MPI|PRMT5|SNAPC5|PKM|TRIM25|INTS5|FIP1L1|PKLR|PTRF|GFPT1|MAX|VCP|SMG5|INTS7|YBX1|CSTF2|MTF1|AR|FECH|PBRM1|SLC11A2|CDK1|THRB|RELA|INTS1|SMARCA4|SNRPE|ARRB2|ARRB1|SNRPB|INTS2|DERA|RXRA|GNPDA1|SMG7|IN…	202	773|809|1435|1513|451|437|377|1265|1107|1131|1497|599|1519|751|685|1395|933|1085|1527|1223|1421|333|865|417|459|853|395|373|1403|353|1467|387|1539|855|771|941|1205|1471|1057|541|1545|1419|525|1377|747|397|1505|785|1099|549|357|1197|677|1357|1507|1449|327|389|1153|635|763|887|701|795|1077|1517|537|595|1413|823|487|669|1321|705|885|1063|965	1.22e-07		GO:0019438	74089353929735	0
870	67	GO Biological Process		Organophosphate metabolic process	4.1e-07	C12orf5|CETP|MAPK1|PON1|GCK|ALDOC|PFKFB4|ENO1|APOA1|MBD4|GFPT2|G6PC|KHK|PDGFRB|LCAT|FGF2|SORD|G6PC3|PFKL|RAB5A|PYURF|PLA2G7|FUK|HK2|FLAD1|HK3|FABP5|HINT1|PPARD|ADPGK|PKM|TALDO1|ENO3|PKLR|PFKM|HKDC1|NKX2-1|GFPT1|APOA4|VCP|PFKFB2|PLA2G4A|APOA2|PGM1|PFKFB1|FBP2|G6PC2|PFKP|PGM2|G6PD|BAD|GLYCTK|TKT|RHOA|HK1|GPI|FBP1|SYNJ1|DERA|ENO2|DBI|NNMT|PFKFB3|APOA5|LDHA|H6PD|CPNE3	202	1521|655|809|841|871|1291|587|767|583|599|1519|475|425|557|963|1161|1543|1245|1095|1023|381|1283|853|727|373|567|1105|387|855|1273|1471|1483|1263|1419|1089|993|1003|1377|463|397|1319|1017|639|757|1335|1255|897|1535|801|1045|1043|995|1007|1157|1219|1541|647|491|1517|1109|419|1321|231|689|971|1331|847	1.29e-07		GO:0019637	7387216143280264	0
60	16	Reactome Pathways		Regulation of PTEN gene transcription	4.15e-06	MAPK1|EGR1|MAPK3|TP53|MTA2|PPARG|SUZ12|CHD4|GATAD2A|MTOR|GATAD2B|RBBP4|HDAC1|RBBP7|CHD3|HDAC2	202	809|851|933|865|1459|459|285|1351|617|593|1019|267|651|929|1337|421	2.37e-07		HSA-8943724	7381951903287908	0
211	29	GO Biological Process		Negative regulation of neuron death	4.18e-06	C12orf5|PIN1|APOE|KRAS|ERBB3|RASA1|WNT3A|APP|FZD1|BAX|WNT1|PRKCI|VPS35|F2R|GSK3B|CTNNB1|FYN|SNX6|PARK2|NENF|SET|BCL2|RHOA|ARRB2|HRAS|ARRB1|EIF4G1|NTRK1|AKT1	202	1521|609|1041|317|715|1035|265|361|503|1403|675|303|1021|1127|1177|989|1509|1061|699|827|563|749|1157|887|277|701|1397|467|1231	1.32e-07		GO:1901215	7378823718224965	0
133	23	GO Biological Process		Cellular response to reactive oxygen species	4.54e-06	MAPK1|MMP2|PDGFRA|MDM2|PDGFRB|MAPK3|CCNA2|EGFR|FABP1|MAPK7|STK25|HDAC6|MAPT|ATP7A|APOA4|SRC|ANXA1|PDCD10|CDK1|RELA|HDAC2|CCS|AKT1	202	809|781|509|523|557|933|979|969|631|1429|1523|493|1297|591|463|815|1405|255|1449|389|421|1165|1231	1.43e-07		GO:0034614	7342944147142896	0
212	29	GO Biological Process		Regulation of protein binding	4.59e-06	PPP2CB|VTN|SYMPK|PIN1|APOE|EIF2S1|DERL1|MAPK3|IDE|WNT3A|APP|BAX|PLK1|MET|GSK3B|PPP1CA|PRMT7|ANXA2|PARK2|SRC|DVL1|FKBP1A|ARRB2|ARRB1|MARK3|HFE|PPP2CA|STK3|AKT1	202	729|505|1497|609|1041|765|861|933|1485|265|361|1403|299|637|1177|837|1091|521|699|815|1211|743|887|701|953|1329|379|1439|1231	1.45e-07		GO:0043393	7338187314462739	0
1054	76	GO Biological Process		Programmed cell death	4.6e-07	C12orf5|PPP1R15A|MAPK1|GZMH|PPP2CB|RPS6KB1|NFKB1|RAF1|SORT1|THOC1|AXIN1|MAPK3|CUL3|DNMT3A|VDAC1|ERBB3|RB1|TP53|APP|KIT|HK2|BAX|PSME3|LRP5|RAD21|VPS35|BUB1|HINT1|CYCS|PPARD|PPP2R1B|CLU|PKM|PPP2R1A|GSK3B|STK25|CUL1|LAMP1|FGFR3|SFN|ERBB4|FXR1|MAX|TGFBR2|MTOR|IVL|TIAL1|STK24|IGFBP3|CHEK2|AKT2|PDCD10|MST4|PPP2R2B|BAD|CDK1|THRB|BCL2|DDX3X|CHEK1|TIA1|HRAS|PRKCA|ARRB1|FGFR2|PPP2R5C|PPP2CA|STK3|NTRK1|RABE…	202	1521|739|809|1341|729|337|437|241|1155|783|1383|933|1481|551|967|715|787|865|361|723|727|1403|229|445|1287|1021|1511|387|873|855|1495|313|1471|1163|1177|1523|925|1355|1323|439|1151|707|747|1487|593|1069|237|247|1229|283|877|255|399|859|1043|1449|327|749|1499|457|1235|277|497|701|977|799|379|1439|467|791|1231|1147|391|1225|1217|1175	1.46e-07		GO:0012501	7337242168318425	0
993	73	GO Biological Process		Positive regulation of cell differentiation	4.61e-06	DVL2|PPP2R5B|UNC13D|NFKB1|APOB|APOA1|PIN1|STYXL1|MYOD1|APOE|MDM2|PPP2R3C|PAX8|KDR|FGF2|SRF|RB1|WNT3A|APP|PPARG|FZD1|KIT|LRP5|PRKCI|MAP2K1|IGF1|CTNNA1|PPARD|DVL3|KIAA0196|PRMT5|STK25|P4HB|CALCA|CAPRIN1|MAPT|SFN|PPP1CC|CTNNB1|FYN|TGFBR2|MTOR|PARK2|S100A10|FMR1|HDAC1|AR|ANXA1|PRKCZ|DVL1|FKBP1B|IGFBP3|BAD|INS|BCL2|RELA|FGFR1|RHOA|MYOCD|ARRB2|PRMT1|PRKCA|SERPINE2|EIF4G1|NCK1|LYN|STK3|HDAC2|NTRK1|AKT1|…	202	431|663|1461|437|679|583|609|711|1281|1041|523|1379|1527|371|1161|1223|787|265|361|459|503|723|445|303|409|1473|545|855|581|1181|941|1523|1533|849|883|1297|439|881|989|1509|1487|593|699|697|951|651|1197|1405|415|1211|643|1229|1043|1457|749|389|1123|1157|755|887|473|497|1141|1397|517|1111|1439|421|467|1231|1081|309|1175	1.47e-07		GO:0045597	7336299074610352	0
102	19	KEGG Pathways		C-type lectin receptor signaling pathway	4.78e-06	MAPK1|NFKB1|PPP3R1|RAF1|KRAS|MDM2|MAPK3|AKT3|PTPN11|NRAS|SRC|AKT2|PPP3CB|PPP3CA|KSR1|RELA|RHOA|HRAS|AKT1	202	809|437|585|241|317|523|933|273|1285|1451|815|877|1363|1371|1375|389|1157|277|1231	1.34e-06		hsa04625	7320572103387881	0
49	15	GO Biological Process		Hexose biosynthetic process	4.81e-06	ALDOC|ENO1|GOT2|G6PC|SORD|G6PC3|AKR1B1|ENO3|PGM1|PFKFB1|FBP2|G6PC2|GPI|FBP1|ENO2	202	1291|767|737|475|1543|1245|769|1263|757|1335|1255|897|1541|647|1109	1.54e-07		GO:0019319	7317854923626168	0
43	14	Reactome Pathways		Condensation of Prophase Chromosomes	4.85e-06	CCNB1|RB1|H2AFZ|PLK1|H2AFV|HIST1H2AJ|HIST2H2AC|HIST1H2AD|SET|HIST1H2AC|CDK1|H2AFX|H2AFJ|H2AFB1	202	685|787|349|299|839|789|1391|931|563|1009|1449|1145|1027|1243	2.79e-07		HSA-2299718	7314258261397736	0
1390	91	Reactome Pathways		Post-translational protein modification	5.05e-06	ST6GALNAC1|PMM1|GNPNAT1|SCG3|SKP1|APOB|IGFBP5|APOA1|C3|APOE|GFPT2|CCNA1|MDM2|DERL1|AXIN1|CUL3|CP|DNMT3A|RAB7A|VDAC1|IDE|PMM2|ASGR1|TP53|IGFBP4|RAB5A|CCNA2|IGFBP1|APP|PPARG|FUK|PSME3|ALB|HIST1H2AA|RAD21|GLB1|COMMD1|F2|HLTF|SUZ12|APOL1|MPI|TRIM25|CUL1|P4HB|HIST1H2AJ|HGS|HIST2H2AC|PLAUR|HIST1H2AD|ASGR2|MKL1|MBD6|GFPT1|ITIH2|WDR5|VCP|TGFBR2|DCTN1|PARK2|APOA2|CDC20|HDAC1|AR|HIST1H2AC|DDX58|RBBP7|CHD3|…	202	681|1435|451|1169|1195|679|1407|583|1445|1041|1519|671|523|861|1383|1481|1339|551|633|967|1485|333|403|865|335|1023|979|1279|361|459|853|229|515|1103|1287|1251|1191|579|235|285|331|771|1057|925|1533|789|559|1391|329|931|441|1005|1477|1377|1139|275|397|1487|615|699|639|625|651|1197|1009|1053|929|1337|1229|1515|287|1449|327|1457|731|389|1189|939|1157|887|701|1193|427|531|537|421|689|885|805|391|309	2.93e-07		HSA-597592	7296708621881338	0
71	17	Reactome Pathways		Plasma lipoprotein assembly, remodeling, and clearance	5.21e-06	CETP|APOC3|APOB|APOA1|APOE|LCAT|ALB|LPA|P4HB|APOA4|APOA2|APOF|PLTP|APOA5|APOC1|APOC2|APOC4	202	655|429|679|583|1041|963|515|999|1533|463|639|621|293|689|295|339|649	3.04e-07		HSA-174824	7283162276700476	0
1592	101	GO Biological Process		Cellular macromolecule biosynthetic process	5.26e-06	ST6GALNAC1|SNRPD3|PMM1|PAPOLA|AGO2|NFKB1|CCND1|APOB|APOA1|CPSF3|TARDBP|HIST1H4F|SYMPK|APOE|GFPT2|PPP1R1B|EIF2S1|CCNB1|CDK4|IGF2BP3|THOC1|MAPK3|SMG6|PAX8|LCAT|SRF|SNRPF|PMM2|ASGR1|TP53|SNRPG|PYURF|EGFR|GEMIN5|PPARG|SSU72|BAX|EIF4A1|ABCE1|CPSF2|IGF1|RPS6KB2|INTS6|PPARD|PABPC1|RBBP6|MPI|PRMT5|SNAPC5|TRIM25|INTS5|FIP1L1|EIF4EBP1|ATP7A|ASGR2|PTRF|GFPT1|MAX|VCP|EIF3B|SMG5|INTS7|PGM1|YBX1|SET|PABPC4|CST…	202	681|773|1435|1513|1097|437|377|679|583|1265|1107|1131|1497|1041|1519|751|765|685|1395|1101|783|933|1085|1527|963|1223|1421|333|403|865|417|381|969|495|459|395|1403|1037|1469|1467|1473|619|1539|855|513|471|771|941|1205|1057|541|1545|901|591|441|525|1377|747|397|1065|1505|785|757|1099|563|955|549|357|267|1197|929|801|877|1357|1449|327|1167|1499|389|1153|457|635|763|887|701|795|1077|1397|537|1413|12…	1.68e-07		GO:0034645	7279014255846261	0
28	12	Reactome Pathways		Processing of Capped Intronless Pre-mRNA	5.33e-06	SNRPD3|PAPOLA|CPSF3|SYMPK|SNRPF|SNRPG|CPSF2|FIP1L1|CSTF2|SNRPE|SNRPB|CPSF1	202	773|1513|1265|1497|1421|417|1467|1545|549|763|795|965	3.14e-07		HSA-75067	7273272790973427	0
153	23	KEGG Pathways		Cushing syndrome	5.4e-07	DVL2|MAPK1|CCND1|CDK4|AXIN1|MAP2K2|MAPK3|RB1|EGFR|WNT3A|FZD1|BRAF|WNT1|MAP2K1|KCNK3|DVL3|FZD2|GSK3B|WNT8B|CTNNB1|WDR5|DVL1|WNT8A	202	431|809|377|1395|1383|821|933|787|969|265|503|1257|675|409|1115|581|817|1177|245|989|275|1211|1207	1.53e-06		hsa04934	7267606240177031	0
660	55	Reactome Pathways		Vesicle-mediated transport	5.8e-07	M6PR|DVL2|APOB|APOA1|YWHAH|APOE|SORT1|AKT3|YWHAE|RAB7A|AMBP|EGF|HPX|RAB5A|FTH1|EGFR|APP|ALB|YWHAG|VAMP2|APOL1|KIF1C|ULK1|DENND5A|HGS|SFN|HP|AMPH|IGF2R|TFRC|DCTN1|PLA2G4A|YWHAB|SRC|SNX5|SNX2|YWHAQ|AKT2|SNX9|GRB2|PPP6R3|YWHAZ|INS|TF|ARRB2|ARRB1|SYNJ1|PPP6R1|DCTN4|SERPINA1|HPR|RABEP1|AKT1|DENND4C|RAB7B	202	1343|431|679|583|831|1041|1155|273|1001|633|1083|577|1493|1023|405|969|361|515|895|501|331|263|1433|449|559|439|875|1525|483|605|615|1017|923|815|447|533|833|877|1373|1271|1515|1143|1457|1189|887|701|491|1193|427|531|1047|791|1231|1409|309	3.44e-07		HSA-5653656	7236572006437063	0
20	11	GO Biological Process		Stress granule assembly	5.9e-07	EIF2S1|MAPT|G3BP2|ATXN2|G3BP1|ATXN2L|DDX3X|UBAP2L|LSM14A|DDX6|CSDE1	202	765|1297|423|359|1241|899|1499|1333|927|363|703	1.89e-07		GO:0034063	7229147988357856	0
174	26	GO Biological Process		Response to carbohydrate	6.15e-06	GCK|APOB|EGR1|RAF1|G6PC|KHK|SRF|PFKL|PPARD|VAMP2|MLXIPL|PKLR|ENSA|TGFBR2|PFKFB2|APOA2|IRS2|APOM|FKBP1B|SLC29A1|BAD|PPP3CA|VIMP|RHOA|LYN|LDHA	202	871|679|851|241|475|425|1223|1095|855|501|683|1419|355|1487|1319|639|1411|1015|643|553|1043|1371|731|1157|1111|971	1.98e-07		GO:0009743	7211124884224583	0
244	31	GO Biological Process		Cellular response to oxidative stress	6.15e-06	MAPK1|MMP2|EIF2S1|PDGFRA|MDM2|PDGFRB|MAPK3|TP53|CCNA2|EGFR|FABP1|CYCS|MAPK7|STK25|HDAC6|MAPT|ATP7A|APOA4|SRC|STK24|ANXA1|PDCD10|G6PD|SLC11A2|CDK1|BCL2|VIMP|RELA|HDAC2|CCS|AKT1	202	809|781|765|509|523|557|933|865|979|969|631|873|1429|1523|493|1297|591|463|815|247|1405|255|1045|1507|1449|749|731|389|421|1165|1231	1.98e-07		GO:0034599	7211124884224583	0
352	38	GO Biological Process		Positive regulation of protein transport	6.15e-06	MAPK1|NUTF2|GCK|PPP3R1|TARDBP|YWHAH|MDM2|IPO5|CDH1|YWHAE|TP53|ERBB2|EGFR|APP|VPS35|IGF1|YWHAG|PPARD|VAMP2|GSK3B|SFN|FYN|PFKFB2|YWHAB|SRC|IRS2|YWHAQ|AKT2|PDCD10|BAD|PPP3CB|CDK1|YWHAZ|INS|BCL2|GPI|HRAS|ARRB1	202	809|629|871|585|1107|831|523|461|271|1001|865|741|969|361|1021|1473|895|855|501|1177|439|1509|1319|923|815|1411|833|877|255|1043|1363|1449|1143|1457|749|1541|277|701	1.99e-07		GO:0051222	7211124884224583	0
274	33	GO Biological Process		Aging	6.23e-06	MAPK1|IGFBP2|IGFBP5|EIF2S1|MBD2|PDGFRB|MAPK3|DNMT3A|SRF|IDE|TP53|IGFBP1|APP|MAP2K1|CTNNA1|ENO3|CALCA|TGFBR2|MTOR|IRAK1|MB21D1|CHEK2|GRB2|PPP3CA|CDK1|BCL2|RELA|CHEK1|HRAS|NTRK1|H2AFX|AKT1|PPP1R9B	202	809|1427|1407|765|1113|557|933|551|1223|1485|865|1279|361|409|545|1263|849|1487|593|945|561|283|1271|1371|1449|749|389|457|277|467|1145|1231|385	2.02e-07		GO:0007568	7205511953340831	0
1643	103	GO Biological Process		Macromolecule biosynthetic process	6.36e-06	ST6GALNAC1|SNRPD3|PMM1|PAPOLA|AGO2|NFKB1|CCND1|APOB|APOA1|CPSF3|TARDBP|HIST1H4F|SYMPK|APOE|GFPT2|PPP1R1B|EIF2S1|CCNB1|CDK4|IGF2BP3|THOC1|PDGFRB|MAPK3|SMG6|PAX8|LCAT|SRF|SNRPF|PMM2|ASGR1|TP53|SNRPG|PYURF|EGFR|GEMIN5|PPARG|SSU72|BAX|EIF4A1|ABCE1|CPSF2|IGF1|RPS6KB2|INTS6|PPARD|PABPC1|RBBP6|MPI|PRMT5|SNAPC5|TRIM25|INTS5|FIP1L1|EIF4EBP1|ATP7A|ASGR2|PTRF|GFPT1|MAX|VCP|EIF3B|SMG5|INTS7|PGM1|YBX1|SET|PAB…	202	681|773|1435|1513|1097|437|377|679|583|1265|1107|1131|1497|1041|1519|751|765|685|1395|1101|783|557|933|1085|1527|963|1223|1421|333|403|865|417|381|969|495|459|395|1403|1037|1469|1467|1473|619|1539|855|513|471|771|941|1205|1057|541|1545|901|591|441|525|1377|747|397|1065|1505|785|757|1099|563|955|549|357|267|1197|929|801|877|287|1357|1449|327|1167|1499|389|1153|457|635|763|887|701|795|1077|1397|537…	2.06e-07		GO:0009059	7196542884351586	0
34	13	GO Biological Process		Termination of RNA polymerase II transcription	6.47e-06	SNRPD3|PAPOLA|CPSF3|SYMPK|SNRPF|SNRPG|SSU72|CPSF2|FIP1L1|CSTF2|SNRPE|SNRPB|CPSF1	202	773|1513|1265|1497|1421|417|395|1467|1545|549|763|795|965	2.1e-08		GO:0006369	71890957193313	0
22	11	Reactome Pathways		SHC1 events in ERBB2 signaling	6.81e-06	KRAS|EGF|ERBB3|ERBB2|EGFR|ERBB4|NRAS|GRB2|SHC1|HRAS|PRKCA	202	317|577|715|741|969|1151|1451|1271|803|277|497	4.07e-07		HSA-1250196	7166852888087215	0
27	12	GO Biological Process		Plasma lipoprotein particle assembly	6.94e-06	APOC3|APOB|APOA1|APOE|P4HB|APOA4|APOA2|APOM|APOA5|APOC1|APOC2|APOC4	202	429|679|583|1041|1533|463|639|1015|689|295|339|649	2.26e-07		GO:0034377	7158640529545145	0
106	20	Reactome Pathways		Signaling by VEGF	7.61e-06	KRAS|FLT4|AKT3|KDR|RASA1|FLT1|CTNNA1|CTNNB1|FYN|MTOR|NRAS|SRC|PRKCZ|AKT2|CTNND1|RHOA|HRAS|PRKCA|NCK1|AKT1	202	317|641|273|371|1035|1387|545|989|1509|593|1451|815|415|877|709|1157|277|497|517|1231	4.59e-07		HSA-194138	7118615343229427	0
292	34	GO Biological Process		Regulation of ERK1 and ERK2 cascade	7.7e-07	CSK|PIN1|APOE|PDGFRA|PDGFRB|FLT4|MAPK3|KDR|FGF2|ERBB2|EGFR|APP|BRAF|FGFR4|MAP2K1|PRMT5|F2R|FGFR3|PTPN11|ERBB4|S100A7|SRC|SPRY2|PRKCZ|TEK|YWHAZ|SHC1|ARRB2|HRAS|PRKCA|ARRB1|FGFR2|LYN|NTRK1	202	1237|609|1041|509|557|641|933|371|1161|741|969|361|1257|807|409|941|1127|1323|1285|1151|1233|815|1253|415|1215|1143|803|887|277|497|701|977|1111|467	2.52e-07		GO:0070372	7113509274827517	0
70	17	GO Biological Process		Positive regulation of DNA biosynthetic process	7.73e-06	MAPK1|CCT7|PDGFRB|MAPK3|FGF2|CCT6A|CCT5|CCT8|FGFR4|CCT3|CCT2|TCP1|CTNNB1|SRC|CCT4|ARRB2|MYC	202	809|1311|557|933|1161|455|601|1261|807|347|1075|911|989|815|259|887|391	2.53e-07		GO:2000573	7111820506081675	0
617	53	GO Biological Process		Regulation of protein transport	7.84e-06	MAPK1|NUTF2|CSK|GCK|PPP3R1|TARDBP|YWHAH|APOE|MDM2|IPO5|CDH1|YWHAE|TP53|ERBB2|PFKL|EGFR|APP|LRP5|VPS35|IGF1|IRS1|YWHAG|PPARD|VAMP2|F2R|GSK3B|PTPN11|SFN|ENSA|FYN|PARK2|PFKFB2|YWHAB|SRC|G6PC2|IRS2|FKBP1B|YWHAQ|AKT2|PDCD10|BAD|PPP3CB|PPP3CA|CDK1|YWHAZ|INS|BCL2|GPI|HRAS|PRKCA|ARRB1|SLC2A1|LYN	202	809|629|1237|871|585|1107|831|1041|523|461|271|1001|865|741|1095|969|361|445|1021|1473|453|895|855|501|1127|1177|1285|439|355|1509|699|1319|923|815|897|1411|643|833|877|255|1043|1363|1371|1449|1143|1457|749|1541|277|497|701|243|1111	2.57e-07		GO:0051223	7105683937315561	0
138	23	GO Biological Process		Response to glucose	8.16e-06	GCK|EGR1|RAF1|KHK|SRF|PFKL|PPARD|VAMP2|MLXIPL|PKLR|ENSA|TGFBR2|PFKFB2|APOA2|IRS2|APOM|FKBP1B|SLC29A1|BAD|PPP3CA|VIMP|RHOA|LDHA	202	871|851|241|425|1223|1095|855|501|683|1419|355|1487|1319|639|1411|1015|643|553|1043|1371|731|1157|971	2.69e-07		GO:0009749	7088309841246139	0
423	42	GO Biological Process		Regulation of cell growth	8.33e-06	IGFBP5|ENO1|PIN1|APOE|SRF|RB1|TP53|ERBB2|IGFBP4|EGFR|IGFBP1|WNT3A|PPARG|IGF1|F2|PPARD|PPP2R1A|GSK3B|MAPT|SFN|FOXM1|MTOR|FGFR1OP|PARK2|PAPPA2|RBBP7|IGFBP3|G6PD|ULK2|INS|BCL2|DDX3X|SMARCA4|RHOA|MYOCD|FBP1|SERPINE2|EIF4G1|PPP2CA|AKT1|PPP1R9B|CTDP1	202	1407|767|609|1041|1223|787|865|741|335|969|1279|265|459|1473|579|855|1163|1177|1297|439|713|593|907|699|1179|929|1229|1045|913|1457|749|1499|635|1157|755|647|1141|1397|379|1231|385|1063	2.75e-07		GO:0001558	7079354998593212	0
171	24	KEGG Pathways		Transcriptional misregulation in cancer	8.54e-06	PLAT|NFKB1|FUS|CCNA1|MDM2|PAX8|TP53|CCNA2|FLT1|PPARG|BAX|IGF1|CXCL8|MET|MAX|TGFBR2|FCGR1A|HDAC1|IGFBP3|RELA|RXRA|HDAC2|NTRK1|MYC	202	529|437|1199|671|523|1527|865|979|1387|459|1403|1473|301|637|747|1487|407|651|1229|389|537|421|467|391	2.44e-06		hsa05202	7068542129310995	0
929	69	GO Biological Process		Leukocyte activation	8.8e-07	UNC13D|MAPK1|CTSG|ALDOC|NFKB1|TTR|EGR1|C3|LGALS3|DNAJC13|RAB7A|SRF|TP53|PFKL|FTH1|APP|CCT8|KIT|HK3|BAX|WNT1|FABP5|CCT2|GUSB|CXCL8|GLB1|VAMP2|CLU|CXCR2|PKM|LAMP1|LCK|PLAUR|MAPT|CTNNB1|CTSB|ATP7A|ANXA2|FYN|HP|IGF2R|VCP|TGFBR2|PRSS3|MTOR|S100A7|SNX27|NRAS|PGM1|IGBP1|ANXA1|FKBP1B|PGM2|PPP3CB|PPP3CA|INS|BCL2|DDX3X|FKBP1A|AHSG|JMJD6|RHOA|GPI|SERPINA1|DERA|NCK1|LYN|NTRK1|CPNE3	202	1461|809|1301|1291|437|1303|851|1445|1039|667|633|1223|865|1095|405|361|1261|723|567|1403|675|1105|1075|1051|301|1251|501|313|909|1471|1355|915|329|1297|989|985|591|521|1509|875|483|397|1487|921|593|1233|1227|1451|757|889|1405|643|801|1363|1371|1457|749|1499|743|939|351|1157|1541|531|1517|517|1111|467|847	2.91e-07		GO:0045321	7055517327849832	0
3702	188	GO Biological Process		Cell differentiation	8.89e-06	DVL2|PPP2R5B|C12orf5|MAPK1|MICALL1|MMP2|CSK|FBL|VTN|ALDOC|CCND1|IGFBP5|WDR77|APOA1|EGR1|C3|PIN1|STYXL1|YWHAH|MYOD1|RAF1|APOE|LGALS3|KRAS|CCNB1|SORT1|PDGFRA|MDM2|DNAJC13|LRP6|SLC6A4|CDH1|PDGFRB|RBL2|MAPK3|PAX8|STRN|KDR|YWHAE|CUL3|FGF2|DNMT3A|PPP2R3A|VDAC1|SRF|ERBB3|RB1|NKD1|TP53|ERBB2|RASA1|EGFR|FLT1|WNT3A|APP|AKR1B1|PPARG|FZD1|KIT|BAX|WNT1|LRP5|PRKCI|HSPA9|MAP2K1|IGF1|CTNNA1|YWHAG|F2|PLG|PPARD|MA…	202	431|663|1521|809|813|781|1237|1353|505|1291|377|1407|1393|583|851|1445|609|711|831|1281|241|1041|1039|317|685|1155|509|523|667|1361|843|271|557|1415|933|1527|793|371|1001|1481|1161|551|1365|967|1223|715|787|867|865|741|1035|969|1387|265|361|769|459|503|723|1403|675|445|303|973|409|1473|545|895|579|281|855|1429|313|581|285|637|1181|941|817|1433|1177|1523|449|493|915|1129|1323|1221|883|245|1297|128…	2.95e-07		GO:0030154	7051098239029787	0
186	25	KEGG Pathways		Chemokine signaling pathway	9.34e-06	MAPK1|NFKB1|RAF1|KRAS|MAPK3|AKT3|BRAF|MAP2K1|CXCL8|CXCR2|GSK3B|NRAS|SRC|PRKCZ|AKT2|GRB2|BAD|RELA|RHOA|SHC1|ARRB2|HRAS|ARRB1|LYN|AKT1	202	809|437|241|317|933|273|1257|409|301|909|1177|1451|815|415|877|1271|1043|389|1157|803|887|277|701|1111|1231	2.7e-07		hsa04062	7029653123769907	0
697	57	GO Biological Process		Regulated exocytosis	9.97e-06	APOH|UNC13D|MAPK1|CTSG|SCG3|ALDOC|NFKB1|APOA1|TTR|C3|LGALS3|DNAJC13|RAB7A|EGF|PFKL|FTH1|APP|CCT8|KIT|HK3|ALB|FABP5|CCT2|IGF1|GUSB|GLB1|PLG|VAMP2|CLU|CXCR2|PKM|LAMP1|PPFIA3|PLAUR|CTSB|ANXA2|HP|IGF2R|VCP|PRSS3|S100A7|NRAS|PGM1|PGM2|PPP3CB|DDX3X|TF|IGF2|AHSG|RHOA|GPI|SYNJ1|SERPINA1|DERA|LYN|RIMS4|CPNE3	202	239|1461|809|1301|1169|1291|437|583|1303|1445|1039|667|633|577|1095|405|361|1261|723|567|515|1105|1075|1473|1051|1251|281|501|313|909|1471|1355|1029|329|985|521|875|483|397|921|1233|1451|757|801|1363|1499|1189|401|939|1157|1541|491|531|1517|1111|535|847	3.31e-07		GO:0045055	7001304841688344	0
660	55	GO Biological Process		Positive regulation of apoptotic process	1.03e-05	C12orf5|PPP3R1|PIN1|STYXL1|YWHAH|EIF2S1|SORT1|CDK4|PDGFRB|YWHAE|TP53|WNT3A|APP|PPARG|BAX|PRKCI|CTNNA1|YWHAG|CYCS|PPP2R1B|CLU|CXCR2|F2R|PPP2R1A|GSK3B|PPP1CA|LCK|PLAUR|MAPT|SFN|CTNNB1|IGF2R|VCP|DDX20|YWHAB|SRC|ANXA1|IGFBP3|YWHAQ|CHEK2|BAD|SLC11A2|YWHAZ|BCL2|DDX3X|RHOA|TIA1|ARRB2|ARRB1|NCK1|LYN|STK3|LDHA|AKT1|MYC	202	1521|585|609|711|831|765|1155|1395|557|1001|865|265|361|459|1403|303|545|895|873|1495|313|909|1127|1163|1177|837|915|329|1297|439|989|483|397|1093|923|815|1405|1229|833|283|1043|1507|1143|749|1499|1157|1235|887|701|517|1111|1439|971|1231|391	3.44e-07		GO:0043065	6987162775294828	0
44	14	GO Biological Process		Positive regulation of glucose transmembrane transport	1.07e-05	C3|BRAF|PRKCI|IGF1|INSR|IRS1|PTPN11|OCLN|IRS2|AKT2|GPC3|INS|AKT1|ARPP19	202	1445|1257|303|1473|983|453|1285|485|1411|877|287|1457|1231|547	3.57e-07		GO:0010828	697061622231479	0
44	14	GO Biological Process		Positive regulation of cardiac muscle tissue development	1.07e-05	MAPK1|PIN1|CCNB1|FGF2|ERBB3|WNT3A|IGF1|ERBB4|MTOR|CDK1|FGFR1|MYOCD|ARRB2|FGFR2	202	809|609|685|1161|715|265|1473|1151|593|1449|1123|755|887|977	3.57e-07		GO:0055025	697061622231479	0
160	23	KEGG Pathways		RNA transport	1.1e-06	TARDBP|FXR2|FUS|EIF2S1|THOC1|GEMIN7|GEMIN6|GEMIN5|EIF4A1|GEMIN2|PABPC1|PRMT5|GEMIN4|EIF4EBP1|FXR1|EIF3B|DDX20|FMR1|PABPC4|GEMIN8|EIF4G1|CLNS1A|UPF1	202	1107|1249|1199|765|783|527|1173|495|1037|611|513|941|905|901|707|1065|1093|951|955|1529|1397|1317|959	3.21e-06		hsa03013	6958607314841775	0
411	41	GO Biological Process		Negative regulation of protein phosphorylation	1.12e-05	CSK|TARDBP|PIN1|APOE|PPP1R1B|CCNB1|LRP6|IPO5|AMBP|RB1|BAX|LRP5|PLK1|YWHAG|MLXIPL|PPP2R1A|SFN|FOXM1|OCLN|MTOR|SNX6|FGFR1OP|PARK2|PPP1R15B|IGBP1|SPRY2|PRKCZ|DVL1|IGFBP3|SH3BP5|MYOCD|ARRB2|ARRB1|CDKN1C|EIF4G1|NCK1|PPP2R5D|PPP2CA|LYN|AKT1|MYC	202	1237|1107|609|1041|751|685|1361|461|1083|787|1403|445|299|895|683|1163|439|713|485|593|1061|907|699|1369|889|1253|415|1211|1229|735|755|887|701|665|1397|517|1135|379|1111|1231|391	3.77e-07		GO:0001933	6950781977329819	0
53	15	GO Biological Process		Regulation of sterol transport	1.13e-05	CETP|PON1|NFKB1|APOC3|APOA1|APOE|EGF|PPARG|ANXA2|APOA4|APOA2|PLTP|APOA5|APOC1|APOC2	202	655|841|437|429|583|1041|577|459|521|463|639|293|689|295|339	3.78e-07		GO:0032371	694692155651658	0
53	15	GO Biological Process		Positive regulation of receptor-mediated endocytosis	1.13e-05	VTN|C3|EGF|WNT3A|APP|INSR|CLU|ANXA2|FMR1|TF|TBC1D5|ARRB2|ARRB1|HFE|APOA5	202	505|1445|577|265|361|983|313|521|951|1189|721|887|701|1329|689	3.78e-07		GO:0048260	694692155651658	0
956	70	GO Biological Process		Regulation of cell development	1.14e-05	DVL2|PPP2R5B|UNC13D|APOA1|PIN1|STYXL1|YWHAH|MYOD1|APOE|MDM2|SLC6A4|SRF|TP53|WNT3A|APP|PPARG|FZD1|KIT|PRKCI|MAP2K1|IGF1|CTNNA1|YWHAG|F2|DVL3|KIAA0196|PRMT5|PPP2R1A|GSK3B|STK25|P4HB|DENND5A|CAPRIN1|MAPT|PPP1CC|ERBB4|CTNNB1|FYN|MTOR|PARK2|S100A10|YTHDF1|FMR1|CDC20|HDAC1|STK24|DVL1|FKBP1B|G6PD|BAD|PPP3CA|CDK1|ULK2|THRB|INS|BCL2|RELA|FGFR1|RHOA|SERPINE2|EIF4G1|NCK1|EIF4E|LYN|HDAC2|NTRK1|PPFIA2|AKT1|DD…	202	431|663|1461|583|609|711|831|1281|1041|523|843|1223|865|265|361|459|503|723|303|409|1473|545|895|579|581|1181|941|1163|1177|1523|1533|449|883|1297|881|1151|989|1509|593|699|697|691|951|625|651|247|1211|643|1045|1043|1371|1449|913|327|1457|749|389|1123|1157|1141|1397|517|1201|1111|421|467|1537|1231|363|1063	3.84e-07		GO:0060284	6943095148663527	0
1400	91	GO Biological Process		Reproductive process	1.2e-06	MAPK1|MMP2|CCND1|APOB|IGFBP2|IGFBP5|WDR77|EGR1|GOT2|PPP1R1B|CCNA1|KRAS|MBD2|CCNB1|PDGFRA|CCT7|LRP6|SLC6A4|PDGFRB|MAPK3|SGOL1|DNMT3A|AMBP|SORD|EGFR|CCT5|APP|AKR1B1|CCT8|PPARG|KIT|BAX|CCT3|RAD21|CCT2|PLK1|MAP2K1|BUB1|INSR|CTNNA1|PLG|PPARD|TCP1|KIAA0196|PPP2R1A|PAPPA|CALCA|PTPN11|PRMT7|CTNNB1|CTSB|NKX2-1|IGF2R|TGFBR2|MTOR|TIAL1|DDX20|SRC|AR|MASTL|ANXA1|GRB2|CCT4|BAD|CDK1|THRB|BCL2|DDX3X|UBAP2L|IGF2|…	202	809|781|377|679|1427|1407|1393|851|737|751|671|317|1113|685|509|1311|1361|843|557|933|465|551|1083|1543|969|601|361|769|1261|459|723|1403|347|1287|1075|299|409|1511|983|545|281|855|911|1181|1163|903|849|1285|1091|989|985|1003|483|1487|593|237|1093|815|1197|1295|1405|1271|259|1043|1449|327|749|1499|1333|401|755|1453|887|701|977|1141|243|293|1329|379|537|595|1439|467|1145|1231|1209|363|385|703|1213	4.08e-07		GO:0022414	6920818753952375	0
129	22	GO Biological Process		Positive regulation of protein localization to membrane	1.21e-05	PPP3R1|YWHAH|LGALS3|YWHAE|TP53|ERBB2|EGFR|WNT3A|PRKCI|YWHAG|SFN|FYN|PARK2|YWHAB|YWHAQ|AKT2|BAD|YWHAZ|BCL2|HRAS|AKT1|PPP1R9B	202	585|831|1039|1001|865|741|969|265|303|895|439|1509|699|923|833|877|1043|1143|749|277|1231|385	4.09e-07		GO:1905477	691721462968355	0
209	28	GO Biological Process		Positive regulation of ERK1 and ERK2 cascade	1.24e-05	APOE|PDGFRA|PDGFRB|FLT4|MAPK3|KDR|FGF2|EGFR|APP|BRAF|FGFR4|MAP2K1|F2R|FGFR3|PTPN11|ERBB4|S100A7|SRC|SPRY2|PRKCZ|TEK|SHC1|ARRB2|HRAS|PRKCA|ARRB1|FGFR2|NTRK1	202	1041|509|557|641|933|371|1161|969|361|1257|807|409|1127|1323|1285|1151|1233|815|1253|415|1215|803|887|277|497|701|977|467	4.22e-07		GO:0070374	6906578314837766	0
447	43	GO Biological Process		Regulation of trans-synaptic signaling	1.24e-05	MAPK1|PLAT|YWHAH|APOE|KRAS|SLC6A4|CDH1|SRF|RAB5A|EGFR|WNT3A|APP|KIT|FABP5|YWHAG|PLG|VAMP2|F2R|GSK3B|PPFIA3|MAPT|FYN|MTOR|PARK2|HTR1B|YTHDF1|FMR1|CDC20|SRC|PRKCZ|DVL1|PTPRA|PPP3CB|PPP3CA|INS|ARRB2|HRAS|SERPINE2|EIF4E|NTRK1|RIMS4|PPFIA2|PPP1R9B	202	809|529|831|1041|317|843|271|1223|1023|969|265|361|723|1105|895|281|501|1127|1177|1029|1297|1509|593|699|1071|691|951|625|815|415|1211|1479|1363|1371|1457|887|277|1141|1201|467|535|1537|385	4.23e-07		GO:0099177	6906578314837766	0
29	12	GO Biological Process		mRNA polyadenylation	1.26e-05	PAPOLA|CPSF3|PAPOLG|SYMPK|APP|SSU72|CPSF2|PABPC1|FIP1L1|CSTF2|PAPOLB|CPSF1	202	1513|1265|891|1497|361|395|1467|513|1545|549|1049|965	4.31e-07		GO:0006378	6899629454882438	0
142	23	GO Biological Process		Cytosolic transport	1.27e-05	SNX8|SORT1|SNX1|RAB7A|RAB5A|VPS26B|VPS35|SNX32|EEA1|KIF1C|UBE2O|DENND5A|LAMP1|DCTN1|SNX6|VPS26A|SNX5|SNX2|TBC1D5|PPFIA2|ANKFY1|RAB7B|VPS29	202	1025|1155|289|633|1023|1385|1021|565|1315|263|1531|449|1355|615|1061|319|447|533|721|1537|753|309|253	4.36e-07		GO:0016482	6896196279044042	0
87	18	Reactome Pathways		TP53 Regulates Metabolic Genes	1.27e-05	C12orf5|AGO2|YWHAH|SCO1|AKT3|YWHAE|TP53|YWHAG|CYCS|SFN|MTOR|YWHAB|YWHAQ|AKT2|G6PD|YWHAZ|GPI|AKT1	202	1521|1097|831|869|273|1001|865|895|873|439|593|923|833|877|1045|1143|1541|1231	7.74e-07		HSA-5628897	6896196279044042	0
3722	188	GO Biological Process		Regulation of RNA metabolic process	1.3e-06	DVL2|PPP2R5B|MAPK1|PAPOLA|AGO2|NFKB1|CCND1|PPP3R1|ENO1|WDR77|EGR1|TARDBP|HIST1H4F|PIN1|YWHAH|MYOD1|FXR2|RAF1|APOE|FUS|CCNA1|KRAS|MBD2|CCNB1|MDM2|IGF2BP3|LRP6|THOC1|CDH1|RBL2|AXIN1|SRCAP|MAP2K2|MAPK3|PAX8|CTCF|CUL3|FGF2|DNMT3A|EGF|SRF|RB1|TP53|ERBB2|CCNA2|RASA1|EGFR|MTA2|WNT3A|APP|PPARG|FZD1|KIT|IGF2BP1|SSU72|PSME3|WNT1|LRP5|PRKCI|H2AFZ|ABCE1|HIST1H2AA|RAD21|PLK1|MAP2K1|IGF1|INSR|HINT1|COMMD1|H2AF…	202	431|663|809|1513|1097|437|377|585|767|1393|851|1107|1131|609|831|1281|1249|241|1041|1199|671|317|1113|685|523|1101|1361|783|271|1415|1383|499|821|933|1527|957|1481|1161|551|577|1223|787|865|741|979|1035|969|1459|265|361|459|503|723|693|395|229|675|445|303|349|1469|1103|1287|299|409|1473|983|387|1191|839|235|855|1429|513|313|581|285|637|941|683|1127|1057|817|1163|443|789|849|1391|493|369|1129|931|…	4.45e-07		GO:0051252	6886056647693163	0
12	9	Reactome Pathways		Regulation of glycolysis by fructose 2,6-bisphosphate metabolism	1.33e-05	PPP2CB|PFKFB4|PPP2R1B|PPP2R1A|PFKFB2|PFKFB1|PPP2R5D|PPP2CA|PFKFB3	202	729|587|1495|1163|1319|1335|1135|379|231	8.12e-07		HSA-9634600	6876148359032914	0
449	43	GO Biological Process		Regulation of peptidase activity	1.39e-05	VTN|C3|RAF1|MDM2|MAPK3|YWHAE|AMBP|WNT3A|APP|PPARG|BAX|PSME3|FABP1|CYCS|F2R|LPA|UBE2O|SERPINA7|LCK|PLAUR|MAPT|SFN|ANXA2|FYN|ITIH2|VCP|HDAC1|SRC|IGBP1|GPC3|BAD|SLC11A2|DDX3X|AHSG|RHOA|ARRB2|ARRB1|SERPINE2|SERPINA1|LYN|AKT1|ANXA8|MYC	202	505|1445|241|523|933|1001|1083|265|361|459|1403|229|631|873|1127|999|1531|607|915|329|1297|439|521|1509|1139|397|651|815|889|287|1043|1507|1499|939|1157|887|701|1141|531|1111|1231|575|391	4.78e-07		GO:0052547	6856985199745905	0
37	13	GO Biological Process		Positive regulation of mitochondrial outer membrane permeabilization involved in apoptotic signaling pathway	1.4e-06	PPP3R1|YWHAH|YWHAE|TP53|BAX|YWHAG|GSK3B|SFN|YWHAB|YWHAQ|BAD|YWHAZ|BCL2	202	585|831|1001|865|1403|895|1177|439|923|833|1043|1143|749	4.85e-07		GO:1901030	6853871964321762	0
87	17	KEGG Pathways		Gap junction	1.43e-05	MAPK1|RAF1|KRAS|PDGFRA|PDGFRB|MAP2K2|MAPK3|EGF|EGFR|MAP2K1|MAPK7|NRAS|SRC|GRB2|CDK1|HRAS|PRKCA	202	809|241|317|509|557|821|933|577|969|409|1429|1451|815|1271|1449|277|497	4.2e-07		hsa04540	6844663962534938	0
170	25	GO Biological Process		Lung development	1.55e-05	MAPK1|IGFBP5|KRAS|PDGFRA|PDGFRB|FLT4|MAPK3|SRF|EGFR|MAP2K1|PPP1CA|EIF4EBP1|CTNNB1|ATP7A|NKX2-1|TGFBR2|SPRY2|GPC3|YWHAZ|THRB|FGFR1|JMJD6|MYOCD|FGFR2|EIF4E	202	809|1407|317|509|557|641|933|1223|969|409|837|901|989|591|1003|1487|1253|287|1143|327|1123|351|755|977|1201	5.39e-07		GO:0030324	6809668301829708	0
271	32	GO Biological Process		Positive regulation of DNA-binding transcription factor activity	1.57e-05	DVL2|PPP2R5B|NFKB1|KRAS|LRP6|SRF|WNT3A|APP|PPARG|FZD1|KIT|WNT1|LRP5|PRKCI|CLU|TRIM25|FZD2|CTNNB1|TFRC|IRAK1|AR|PRKCZ|DDX58|PPP3CA|INS|RELA|SMARCA4|MYOCD|STK3|NTRK1|AKT1|RAB7B	202	431|663|437|317|1361|1223|265|361|459|503|723|675|445|303|313|1057|817|989|605|945|1197|415|1053|1371|1457|389|635|755|1439|467|1231|309	5.48e-07		GO:0051091	6804100347590766	0
522	47	GO Biological Process		Heart development	1.58e-05	DVL2|MAPK1|SNX17|RAF1|MBD2|CCNB1|PDGFRA|MDM2|COX17|LRP6|PDGFRB|MAPK3|PAX8|SRF|ERBB3|RB1|TP53|ERBB2|WNT3A|PPARG|FZD1|IFT122|MAP2K1|INSR|PPARD|FZD2|PTPN11|ERBB4|CTNNB1|TGFBR2|MTOR|LMNA|TEK|GPC3|PPP3CB|CDK1|MYH11|MB|FKBP1A|FHL2|JMJD6|SHC1|MYOCD|FGFR2|RXRA|WNT8A|STK3	202	431|809|573|241|1113|685|509|523|991|1361|557|933|1527|1223|715|787|865|741|265|459|503|1367|409|983|855|817|1285|1151|989|1487|593|519|1215|287|1363|1449|1267|1117|743|305|351|803|755|977|537|1207|1439	5.52e-07		GO:0007507	6801342913045577	0
55	15	GO Biological Process		Regulation of telomere maintenance via telomerase	1.66e-05	MAPK1|CCT7|MAPK3|SMG6|CCT6A|CCT5|CCT8|CCT3|CCT2|TCP1|CTNNB1|SMG5|SRC|CCT4|SMG7	202	809|1311|933|1085|455|601|1261|347|1075|911|989|1505|815|259|1413	5.79e-07		GO:0032210	6779891911959945	0
418	41	GO Biological Process		Regulation of endopeptidase activity	1.68e-05	VTN|C3|RAF1|MDM2|YWHAE|AMBP|WNT3A|APP|PPARG|BAX|PSME3|FABP1|CYCS|F2R|LPA|UBE2O|SERPINA7|LCK|PLAUR|MAPT|SFN|ANXA2|FYN|ITIH2|VCP|HDAC1|SRC|IGBP1|BAD|SLC11A2|DDX3X|AHSG|RHOA|ARRB2|ARRB1|SERPINE2|SERPINA1|LYN|AKT1|ANXA8|MYC	202	505|1445|241|523|1001|1083|265|361|459|1403|229|631|873|1127|999|1531|607|915|329|1297|439|521|1509|1139|397|651|815|889|1043|1507|1499|939|1157|887|701|1141|531|1111|1231|575|391	5.88e-07		GO:0052548	6774690718274137	0
1522	96	GO Biological Process		Cellular nitrogen compound biosynthetic process	1.71e-05	SNRPD3|MAPK1|PMM1|PAPOLA|GNPNAT1|AGO2|NFKB1|CCND1|CPSF3|TARDBP|HIST1H4F|SYMPK|MBD4|GFPT2|PPP1R1B|EIF2S1|CCNB1|CDK4|IGF2BP3|MAPK3|SMG6|PAX8|SRF|SNRPF|PMM2|TP53|SNRPG|EGFR|GEMIN5|PPARG|FUK|SSU72|FLAD1|BAX|EIF4A1|GNPDA2|ABCE1|CPSF2|HINT1|RPS6KB2|INTS6|PPARD|PABPC1|MPI|PRMT5|SNAPC5|PKM|TRIM25|INTS5|FIP1L1|PKLR|EIF4EBP1|PTRF|GFPT1|MAX|VCP|EIF3B|MTOR|SMG5|INTS7|YBX1|PABPC4|CSTF2|MTF1|AR|FECH|PBRM1|SLC1…	202	773|809|1435|1513|451|1097|437|377|1265|1107|1131|1497|599|1519|751|765|685|1395|1101|933|1085|1527|1223|1421|333|865|417|969|495|459|853|395|373|1403|1037|353|1469|1467|387|619|1539|855|513|771|941|1205|1471|1057|541|1545|1419|901|525|1377|747|397|1065|593|1505|785|1099|955|549|357|1197|677|1357|1507|1449|327|1167|1499|389|1153|635|763|887|701|795|1077|1397|1517|537|595|1413|1201|823|487|669|132…	6.01e-07		GO:0044271	6767003889607845	0
75	17	GO Biological Process		Animal organ regeneration	1.75e-05	VTN|CCND1|APOA1|CDK4|CCNA2|EGFR|PPARG|WNT1|PRMT5|PKM|IGF2R|TGFBR2|APOA2|PFKFB1|CDK1|HFE|NNMT	202	505|377|583|1395|979|969|459|675|941|1471|483|1487|639|1335|1449|1329|1321	6.2e-08		GO:0031100	6756961951313706	0
38	13	GO Biological Process		Positive regulation of glucose metabolic process	1.78e-05	GCK|IGF1|INSR|IRS1|WDR5|SRC|IRS2|AKT2|INS|IGF2|AKT1|ARPP19|SMEK2	202	871|1473|983|453|275|815|1411|877|1457|401|1231|547|1489	6.32e-07		GO:0010907	6749579997691106	0
2788	150	GO Biological Process		Biosynthetic process	1.79e-05	ST6GALNAC1|SNRPD3|MAPK1|PMM1|PAPOLA|GNPNAT1|AGO2|TG|ALDOC|NFKB1|CCND1|APOB|ENO1|APOA1|CPSF3|TARDBP|HIST1H4F|GOT2|SYMPK|MBD4|APOE|GFPT2|G6PC|PPP1R1B|EIF2S1|CCNB1|CDK4|IGF2BP3|THOC1|SLC6A4|PDGFRB|MAPK3|SMG6|PAX8|LCAT|FGF2|SRF|SNRPF|SORD|PMM2|G6PC3|ASGR1|TP53|SNRPG|RAB5A|PYURF|EGFR|GEMIN5|AKR1B1|PPARG|FUK|SSU72|FLAD1|BAX|EIF4A1|GNPDA2|ABCE1|FABP5|CPSF2|IGF1|HINT1|RPS6KB2|INTS6|PPARD|PABPC1|RBBP6|MPI…	202	681|773|809|1435|1513|451|1097|1417|1291|437|377|679|767|583|1265|1107|1131|737|1497|599|1041|1519|475|751|765|685|1395|1101|783|843|557|933|1085|1527|963|1161|1223|1421|1543|333|1245|403|865|417|1023|381|969|495|769|459|853|395|373|1403|1037|353|1469|1105|1467|1473|387|619|1539|855|513|471|771|555|941|1205|1471|1483|1057|1263|541|1545|1419|901|591|441|525|1377|463|747|397|1065|593|1505|785|1017|…	6.37e-07		GO:0009058	6747146969020107	0
17	10	GO Biological Process		Reverse cholesterol transport	1.81e-05	CETP|APOC3|APOA1|APOE|LCAT|CLU|APOA4|APOA2|APOM|APOC2	202	655|429|583|1041|963|313|463|639|1015|339	6.44e-07		GO:0043691	6742321425130815	0
[truncated: 1,665 more rows]

## Sheet: 0-95%O2 UP
Column1	Column2	Column3	Column4	Column5	Column6	Column7	Column8	Column9	Column10	Column11	Column12	Column13	Column14
# background genes	# genes	category	chart color	description	FDR value	genes	network.SUID	nodes.SUID	p-value	PMID	term name	transferred FDR value	year
1805	18	GO Biological Process		Vesicle-mediated transport	0.0158	RAB35|APOB|TSG101|ARL8B|ARPC1A|ARCN1|AGA|ITIH4|OLA1|AGL|AP1S1|PIGR|S100A8|CHMP1A|NLGN1|CORO1C|VPS53|RABEP1	157760	157839|158473|158801|158313|158363|158069|158269|158349|158387|158323|157907|157945|158097|157983|157869|158403|158415|158385	1.23E-6		GO:0016192	0.3169130040702401	0
232	7	GO Biological Process		Endosomal transport	0.0289	RAB35|TSG101|ARL8B|AP1S1|CHMP1A|CORO1C|VPS53	157760	157839|158801|158313|157907|157983|158403|158415	4.5E-6		GO:0016197	0.27077658822791184	0
[truncated: 3 more rows]

## Sheet: 0-95%O2 DN
Column1	Column2	Column3	Column4	Column5	Column6	Column7	Column8	Column9	Column10	Column11	Column12	Column13	Column14
[truncated: 5 more rows]

[truncated: 8 more sheets: 0-95%O2 ALL, 2%O2 UP, 2%O2 DN, 2%O2 ALL, 10%O2 ALL, 95%O2 UP, 95%O2 DN, 95%O2 ALL]
