# Supplementary material for: The Proteome of Extracellular Vesicles Released from Pulmonary Microvascular Endothelium Reveals Impact of Oxygen Conditions on Biotrauma
Source: Int J Mol Sci. 2024 Feb 19;25(4):2415. doi: 10.3390/ijms25042415 (PMC10889365; doi:10.3390/ijms25042415)
Supplement: Supplementary file 1 [file ijms-25-02415-s001.zip › Supplemental Data S3.xlsx]

## Sheet: 0-95% O2
ID	Description	setSize	enrichmentScore	NES	pvalue	p.adjust	qvalue	rank	leading_edge	core_enrichment
M189	KEGG_RIBOSOME	77	0.538823	2.04709	2.81559e-05	0.115523	0.115523	550	tags=66%, list=32%, signal=47%	Q71UM5/P62273/P62913/P46777/P62841/P18077/P08708/P61927/P62244/P40429/P49207/P46783/P23396/P18621/P61247/P62266/P62906/P62851/P62750/P61353/P62753/P05387/P62910/Q9UNX3/P62424/Q07020/P62277/P39023/P62979/P27635/P62847/P62280/P32969/P25398/Q02878/P61254/P62081/P62854/P46778/Q9Y3U8/P18124/P30050/P61313/P46779/P05388/P83731/P46776/P62249/P08865/P42766/P83881
M39495	WP_CYTOPLASMIC_RIBOSOMAL_PROTEINS	75	0.537073	2.02938	5.82673e-05	0.119535	0.119535	550	tags=65%, list=32%, signal=47%	P62273/P62913/P46777/P62841/P18077/P08708/P61927/P62244/P40429/P49207/P46783/P23396/P18621/P61247/P62266/P62906/P62851/P62750/P61353/P62753/P05387/P62910/P62424/Q07020/P62277/P39023/P62979/P27635/P62847/P62280/P32969/P25398/Q02878/P61254/P62081/P62854/P46778/Q9Y3U8/P18124/P30050/P61313/P46779/P05388/P83731/P46776/P62249/P08865/P42766/P83881
M41836	REACTOME_CELLULAR_RESPONSE_TO_STARVATION	93	0.487803	1.88332	0.000122949	0.168154	0.168154	550	tags=62%, list=32%, signal=45%	Q71UM5/Q9UI12/P62273/P62913/P46777/P62841/P18077/P08708/P61927/P62244/P40429/Q16864/P55735/P49207/P46783/P23396/P18621/P61247/P62266/P62906/P62851/P62750/P61353/P62753/P05387/P62910/Q9UNX3/P62424/Q07020/P62277/P39023/P62979/P27635/P62847/P62280/P32969/P25398/Q02878/P61254/P62081/P62854/Q9P0V3/P46778/Q9Y3U8/P18124/P36543/Q9Y5K8/P30050/P61313/P46779/P38606/P05388/P83731/P46776/P62249/P08865/P42766/…
M4669	REACTOME_INFLUENZA_INFECTION	95	0.476768	1.85227	0.000205456	0.169569	0.169569	550	tags=61%, list=32%, signal=44%	Q71UM5/Q14974/O00410/P62273/P62913/P46777/P62841/P18077/P08708/P61927/P62244/P40429/P55735/P49207/P46783/P23396/P18621/P61247/P62266/P62906/P62851/P62750/P61353/P09496/P62753/P05387/Q00610/P62910/Q9UNX3/P62424/Q07020/P62277/P39023/P62979/P27635/P62847/P62280/P0DMV9/P32969/P25398/Q02878/P61254/P62081/P27824/P62854/P46778/Q9Y3U8/P18124/P30050/P61313/P46779/P05388/P83731/P46776/P62249/P08865/P42766/…
M29556	REACTOME_EUKARYOTIC_TRANSLATION_ELONGATION	83	0.499417	1.91369	0.00020664	0.169569	0.169569	550	tags=63%, list=32%, signal=45%	Q71UM5/P62273/P62913/P46777/P62841/P18077/P08708/P61927/P62244/P40429/P49207/P46783/P23396/P18621/P61247/P62266/P62906/P62851/P62750/P61353/P62753/P05387/P62910/Q9UNX3/P62424/Q07020/P62277/P39023/P62979/P27635/P62847/P62280/P32969/P25398/Q02878/P61254/P62081/P62854/P46778/Q9Y3U8/P18124/P26641/P30050/P61313/P46779/P05388/P83731/P46776/P62249/P08865/P42766/P83881
M1559	MARIADASON_REGULATED_BY_HISTONE_ACETYLATION_UP	12	-0.836229	-1.98492	0.000417708	0.237581	0.237581	36	tags=25%, list=2%, signal=25%	P07902/Q9UJJ9/O14976
M27685	REACTOME_RRNA_PROCESSING	90	0.468149	1.8077	0.000433397	0.237581	0.237581	550	tags=62%, list=32%, signal=45%	Q71UM5/P62273/P62913/P46777/P62841/P18077/P08708/P61927/P62244/P40429/P78345/P49207/P46783/P23396/P19338/P18621/P61247/P62266/P62906/P62851/P62750/P61353/P62753/P05387/P62910/Q9UNX3/P62424/O43818/Q07020/P62277/P39023/P62979/P27635/P62847/Q9Y2X3/P62280/P32969/P25398/Q02878/P61254/P62081/P62854/P46778/Q9Y3U8/P18124/Q8NI36/P30050/P61313/P46779/P05388/P83731/P46776/P62249/P08865/P42766/P83881
M29813	REACTOME_RESPONSE_OF_EIF2AK4_GCN2_TO_AMINO_ACID_DEFICIENCY	81	0.487431	1.86782	0.000463235	0.237581	0.237581	550	tags=63%, list=32%, signal=45%	Q71UM5/P62273/P62913/P46777/P62841/P18077/P08708/P61927/P62244/P40429/P49207/P46783/P23396/P18621/P61247/P62266/P62906/P62851/P62750/P61353/P62753/P05387/P62910/Q9UNX3/P62424/Q07020/P62277/P39023/P62979/P27635/P62847/P62280/P32969/P25398/Q02878/P61254/P62081/P62854/P46778/Q9Y3U8/P18124/P30050/P61313/P46779/P05388/P83731/P46776/P62249/P08865/P42766/P83881
M27921	REACTOME_NONSENSE_MEDIATED_DECAY_NMD	85	0.464638	1.79008	0.000837155	0.38165	0.38165	550	tags=61%, list=32%, signal=44%	Q71UM5/P62273/P62913/P46777/P62841/P18077/P08708/P61927/P62244/P40429/P49207/P46783/P23396/P18621/P61247/P62266/P62906/P62851/P62750/P61353/P62753/P05387/P62910/Q9UNX3/P62424/Q07020/P62277/P39023/P62979/P27635/P62847/P62280/P32969/P25398/Q02878/P61254/P62081/P62854/P46778/Q9Y3U8/P18124/P30050/P61313/P46779/P30153/P05388/P83731/P46776/P62249/P08865/P42766/P83881
M15877	GOBP_POSITIVE_REGULATION_OF_INFLAMMATORY_RESPONSE	26	0.642698	1.93517	0.0024809	0.907257	0.907257	40	tags=15%, list=2%, signal=15%	O00408/P78423/Q9NZH0/P05109
M27686	REACTOME_EUKARYOTIC_TRANSLATION_INITIATION	101	0.414966	1.63168	0.00252393	0.907257	0.907257	550	tags=55%, list=32%, signal=40%	Q71UM5/Q9UI10/P62273/P62913/P46777/P62841/P18077/P08708/P61927/P62244/P40429/P49207/P46783/P49770/P23396/P18621/P61247/P62266/P62906/P62851/P62750/P61353/P62753/P05387/P62910/Q9UNX3/P62424/Q07020/P62277/P39023/P62979/P27635/P62847/P62280/O15372/P32969/P25398/Q02878/P61254/P62081/Q13144/P62854/P46778/Q9Y3U8/P18124/P30050/P61313/P46779/Q14152/P05388/P83731/P46776/P62249/P08865/P42766/P83881
M13170	GOBP_REGULATION_OF_CELL_CYCLE	112	0.406202	1.63053	0.00281134	0.907257	0.907257	188	tags=20%, list=11%, signal=19%	O43293/Q71UM5/Q7LG56/Q99816/Q96K76/Q9HD42/P78344/O75400/O00410/P43246/P62745/Q99538/O00571/P29590/P78527/Q08J23/P15927/O75581/Q9P258/Q32P44/O95373/P62244
M19030	GOBP_REGULATION_OF_MITOTIC_CELL_CYCLE	47	0.525394	1.82742	0.00287457	0.907257	0.907257	174	tags=23%, list=10%, signal=22%	O43293/Q71UM5/Q7LG56/Q96K76/P43246/Q99538/O00571/P29590/P78527/P15927/Q9P258
M16368	GOBP_MUCOPOLYSACCHARIDE_METABOLIC_PROCESS	15	0.73355	1.97607	0.00348308	1	1	87	tags=27%, list=5%, signal=26%	Q14624/O95782/Q06033/Q16394
M10617	GOBP_INFLAMMATORY_RESPONSE	106	0.404335	1.60986	0.00374459	1	1	219	tags=20%, list=13%, signal=18%	Q14624/O00408/Q04206/P78423/Q9NZH0/P05109/Q9NPH3/P29317/Q16394/P62328/Q13151/P06702/P02765/P02786/P01023/P63000/O00161/Q96QK1/Q9UKK3/P26022/P19174
M27170	REACTOME_SELENOAMINO_ACID_METABOLISM	97	0.405249	1.58378	0.00462016	1	1	550	tags=58%, list=32%, signal=42%	Q71UM5/P62273/P62913/P46777/P62841/P18077/P08708/P61927/P62244/P40429/P23526/P49207/P46783/P23396/P18621/P61247/P62266/P62906/P62851/P62750/P61353/P62753/P05387/P41252/P62910/Q9UNX3/P62424/Q07020/P62277/P39023/P62979/P27635/P62847/P62280/P32969/P25398/Q02878/P61254/P62081/P07814/P62854/P46778/Q9Y3U8/Q13155/P18124/P30050/P61313/P46779/P14868/P05388/P83731/P46776/P62249/P08865/P42766/P83881
M1975	MIKKELSEN_IPS_LCP_WITH_H3K4ME3	10	0.799471	1.89825	0.00467483	1	1	31	tags=20%, list=2%, signal=20%	O43293/P35858
M4605	FONTAINE_FOLLICULAR_THYROID_ADENOMA_UP	12	-0.771203	-1.83057	0.00471193	1	1	60	tags=42%, list=3%, signal=41%	P35916/O00151/P07902/P48506/O15031
M39341	WP_SPINAL_CORD_INJURY	21	-0.644867	-1.73454	0.00504753	1	1	97	tags=24%, list=6%, signal=23%	P02458/P01031/P17302/P05362/P13611
M13402	GOBP_AMINOGLYCAN_METABOLIC_PROCESS	25	0.634406	1.90301	0.00531247	1	1	102	tags=20%, list=6%, signal=19%	Q14624/O95782/Q06033/Q16394/P22304
M567	REACTOME_SRP_DEPENDENT_COTRANSLATIONAL_PROTEIN_TARGETING_TO_MEMBRANE	85	0.424142	1.63407	0.00535222	1	1	550	tags=61%, list=32%, signal=44%	Q71UM5/P62273/P62913/P46777/P62841/P18077/P08708/P61927/P62244/P40429/P49207/P46783/P23396/P18621/P61247/P62266/P62906/P62851/P62750/P61353/P62753/P05387/P62910/Q9UNX3/P62424/Q07020/P62277/P39023/P62979/P27635/P62847/P62280/P32969/P25398/Q02878/P61254/P62081/P62854/P46778/Q9Y3U8/Q9UHB9/P18124/P30050/P61313/P46779/P05388/P83731/P46776/P62249/P08865/P42766/P83881
M6557	GOBP_ACUTE_INFLAMMATORY_RESPONSE	19	0.662909	1.89166	0.0057809	1	1	167	tags=32%, list=10%, signal=29%	Q14624/P05109/Q16394/P02765/P02786/P01023
M18491	STEIN_ESRRA_TARGETS_UP	45	-0.534352	-1.64257	0.0058838	1	1	271	tags=44%, list=16%, signal=38%	Q9NR45/Q6IBS0/P99999/Q9Y277/Q9Y2Q3/Q9HAV7/P40925/Q00325/P53634/P30519/O75153/P46821/Q9UK23/P24752/P09972/P17174/Q99798/P22570/P50213/Q16698
M9483	SUNG_METASTASIS_STROMA_UP	36	-0.582537	-1.74632	0.00619341	1	1	321	tags=39%, list=19%, signal=32%	Q15417/P53985/P10253/P26368/P02461/P98160/P05997/Q99715/Q13740/P31431/Q8NBJ4/Q13596/O00469/P13611
M43031	GOBP_MITOTIC_CELL_CYCLE_PROCESS	94	0.404084	1.56414	0.00705178	1	1	281	tags=26%, list=16%, signal=23%	O43293/Q13616/Q71UM5/Q7LG56/O95347/Q96K76/Q9HD42/Q14974/P43246/P62745/O00571/P29590/P78527/P15927/Q9P258/Q93034/Q32P44/P36405/P55072/P50570/Q9Y6G9/Q13564/P62753/Q15018
M12763	RAMALHO_STEMNESS_DN	13	-0.736503	-1.7605	0.00708626	1	1	2	tags=15%, list=0%, signal=15%	P13591/O94973
M15507	GOBP_POSITIVE_REGULATION_OF_WNT_SIGNALING_PATHWAY	19	0.650719	1.85688	0.00775483	1	1	246	tags=32%, list=14%, signal=27%	O43293/Q9NZH0/Q96K76/O00571/Q96QK1/P55072
M10085	GOBP_CYTOPLASMIC_TRANSLATION	98	0.398786	1.55678	0.008576	1	1	550	tags=55%, list=32%, signal=40%	P62273/Q8WU90/P62913/P46777/P62841/P18077/P08708/P61927/P62244/P49588/P40429/P49207/P46783/P23396/P18621/P61247/P62266/P62906/P62851/P62750/P61353/P62753/P05387/O75534/P62910/Q9UNX3/P62424/Q07020/P62277/P39023/P62979/P27635/P62847/P62280/P32969/P25398/Q02878/P61254/P62081/P62854/P46778/Q9Y3U8/P18124/P30050/P61313/P46779/Q14152/P05388/P83731/P46776/P62249/P08865/P42766/P83881
M2426	LOPEZ_TRANSLATION_VIA_FN1_SIGNALING	13	0.717443	1.82694	0.00916572	1	1	287	tags=54%, list=17%, signal=45%	O43293/P53041/P49756/Q9NSC5/P26599/Q12906/P07996
M843	STEIN_ESRRA_TARGETS	60	-0.48517	-1.58792	0.00967083	1	1	271	tags=40%, list=16%, signal=35%	Q9NR45/Q6IBS0/P99999/Q9Y277/P05455/P35232/Q9Y2Q3/Q9HAV7/P40925/Q00325/P53634/P30519/O75153/Q14137/P46821/Q9UK23/P24752/P09972/P17174/Q99798/P22570/P50213/P46926/Q16698
M15368	ROSS_AML_WITH_PML_RARA_FUSION	17	-0.694202	-1.75677	0.0100837	1	1	171	tags=29%, list=10%, signal=27%	Q9P2R3/Q13740/P02458/P27816/P34059
M2329	BILANGES_RAPAMYCIN_SENSITIVE_GENES	10	0.771064	1.8308	0.0101256	1	1	268	tags=60%, list=15%, signal=51%	O95347/P62913/P62841/P49207/P62750/P61353
M12676	FOSTER_TOLERANT_MACROPHAGE_DN	58	-0.496085	-1.60711	0.0102931	1	1	178	tags=26%, list=10%, signal=24%	P50591/P53634/Q9NX76/Q15942/Q13740/P46531/P31431/O43172/Q13451/Q86SQ4/P17302/Q9NVA2/P18085/O00469/P13611
M14526	GOBP_POSITIVE_REGULATION_OF_CANONICAL_WNT_SIGNALING_PATHWAY	15	0.690361	1.85973	0.0109839	1	1	298	tags=47%, list=17%, signal=39%	O43293/Q9NZH0/Q96K76/O00571/Q96QK1/P55072/P14923
M15760	GOBP_REGULATION_OF_CELL_CYCLE_PROCESS	78	0.415617	1.58423	0.0114284	1	1	184	tags=18%, list=11%, signal=17%	O43293/Q71UM5/Q7LG56/Q96K76/Q9HD42/O75400/P43246/O00571/P29590/P78527/Q08J23/P15927/Q9P258/Q32P44
M27876	REACTOME_REGULATION_OF_EXPRESSION_OF_SLITS_AND_ROBOS	126	0.367094	1.4902	0.0117471	1	1	564	tags=52%, list=33%, signal=38%	Q71UM5/P62273/P62913/Q16401/P46777/P62841/P18077/P08708/P61927/P62244/P40429/P28065/P49207/Q15370/P46783/P23396/Q13200/P49721/P18621/P61247/P62266/P62906/P62851/P62750/P61353/P62753/P05387/P62910/Q9UNX3/P62424/Q07020/P62277/P39023/P62979/P27635/P62847/O00487/P62280/P51665/P32969/P25398/Q02878/P61254/P25789/P62081/P62854/P28072/P46778/Q9Y3U8/P55036/P18124/P35998/P30050/P61313/P46779/P05388/P83731/…
M13449	CAIRO_HEPATOBLASTOMA_DN	31	0.563009	1.74423	0.011833	1	1	157	tags=26%, list=9%, signal=24%	Q14624/P35573/P35858/Q9NPH3/P29317/Q16394/P55263/P09467
M1966	MIKKELSEN_MEF_LCP_WITH_H3K4ME3	15	0.683925	1.84239	0.0138887	1	1	3	tags=7%, list=0%, signal=7%	O43293
M18562	MANALO_HYPOXIA_DN	58	-0.483286	-1.56564	0.0146102	1	1	252	tags=29%, list=15%, signal=26%	P22102/P35232/P05198/Q07021/P43487/Q9NR30/Q00059/P68371/Q01130/Q14137/P15531/Q06203/P09874/P50213/P46926/P27708/O43324
M7494	REACTOME_TOLL_LIKE_RECEPTOR_CASCADES	23	0.599804	1.78033	0.0147505	1	1	148	tags=26%, list=9%, signal=24%	Q13616/Q04206/P04114/P05109/Q99538/P06702
M11353	GOBP_REGULATION_OF_CELL_JUNCTION_ASSEMBLY	39	0.517822	1.70976	0.0156109	1	1	195	tags=26%, list=11%, signal=23%	O43293/Q8N2Q7/Q9NPH3/Q9ULV4/P29317/P60903/Q9P258/O00501/P63000/Q96QK1
M2385	KATSANOU_ELAVL1_TARGETS_UP	26	-0.584855	-1.65438	0.0158284	1	1	539	tags=54%, list=31%, signal=38%	P12644/P47895/P10768/P61626/P27105/Q99523/P15924/P00352/P26006/O14950/P53634/O00469/P20933/Q8N128
M12176	CAIRO_HEPATOBLASTOMA_CLASSES_DN	37	0.518341	1.69393	0.0160089	1	1	15	tags=8%, list=1%, signal=8%	Q14624/O00408/Q71UM5
M4391	PEREZ_TP53_TARGETS	67	-0.459693	-1.52215	0.0163447	1	1	313	tags=33%, list=18%, signal=28%	Q9GZM7/P10253/P13598/P01344/Q93063/P29466/O95602/P20827/P05997/P52943/O75146/Q6UWH4/Q9UKP4/P02458/Q6PCB0/Q9NS15/P22570/O60279/Q96CN7/P01034/P13611/O14976
M24601	GOBP_CLATHRIN_DEPENDENT_ENDOCYTOSIS	14	-0.706968	-1.72099	0.0173007	1	1	65	tags=36%, list=4%, signal=35%	O75146/P53680/Q9UHD9/O14976/O94973
M61	FISCHER_DIRECT_P53_TARGETS_META_ANALYSIS	46	0.470362	1.62429	0.0173358	1	1	139	tags=22%, list=8%, signal=21%	Q9NYK5/Q5T5P2/Q92696/Q71UM5/Q7LG56/P29317/Q07954/Q9UIQ6/P29590/Q04446
M38978	MANNE_COVID19_ICU_VS_HEALTHY_DONOR_PLATELETS_UP	12	-0.730829	-1.73473	0.0175795	1	1	73	tags=33%, list=4%, signal=32%	Q13451/P22570/Q8NHP8/P36404
M18973	NIKOLSKY_BREAST_CANCER_20Q12_Q13_AMPLICON	13	-0.702751	-1.67982	0.0187009	1	1	395	tags=54%, list=23%, signal=42%	Q8NDH3/Q9UBR2/Q9NTU7/Q9H4B7/P18031/P31946/P31431
M27842	REACTOME_PLASMA_LIPOPROTEIN_REMODELING	11	0.736589	1.81304	0.0188844	1	1	181	tags=45%, list=10%, signal=41%	P04114/P02656/Q92824/P55058/P02768
M13867	ONDER_CDH1_TARGETS_2_UP	61	-0.462513	-1.5208	0.0191714	1	1	468	tags=39%, list=27%, signal=30%	P20908/P02452/Q16270/Q13867/P29966/P14543/Q14195/Q9UDY4/P19022/Q9NRN5/P02461/P08123/Q9NQS3/Q9UNF1/P27658/P05997/P52943/P28300/P10124/P46821/Q13451/Q9NVA2/O00469/P13611
M15774	DANG_BOUND_BY_MYC	270	-0.330412	-1.34098	0.0195987	1	1	245	tags=18%, list=14%, signal=18%	P08581/P12821/Q9Y277/P05455/P35232/P05198/Q9UBQ0/Q9HB71/P0DP23/O00743/P40925/Q16629/Q00325/P53634/Q92499/P08572/Q6UWH4/P55084/Q01130/P06748/Q8N699/P10301/P22061/P18031/Q9Y2W1/P15531/Q9UK23/P05091/P61011/P54803/Q06203/Q15599/P09874/Q99798/P09211/P13804/Q09161/Q96KP4/P18085/P07737/P07902/P05362/P27708/P48506/Q10570/O43324/Q9UJW0/O14976
M14698	HOEBEKE_LYMPHOID_STEM_CELL_UP	15	0.665879	1.79378	0.0202519	1	1	2	tags=7%, list=0%, signal=7%	Q14624
M13438	STEARMAN_TUMOR_FIELD_EFFECT_UP	10	0.746229	1.77183	0.0203512	1	1	2	tags=10%, list=0%, signal=10%	Q14624
M10484	GOBP_REGULATION_OF_CELL_MORPHOGENESIS	69	0.402819	1.50495	0.0209452	1	1	180	tags=17%, list=10%, signal=16%	O43293/Q9BR76/Q9NVD7/O75400/O75051/Q9ULV4/P60903/P62745/P78527/Q8N392/Q9P258/P63000
M8759	ROPERO_HDAC2_TARGETS	16	0.658562	1.8163	0.0214499	1	1	85	tags=31%, list=5%, signal=30%	Q13630/P48723/P49747/Q9ULV4/P29317
M12103	GOBP_CHOLESTEROL_EFFLUX	11	0.730412	1.79784	0.0218179	1	1	145	tags=45%, list=8%, signal=42%	P04114/P02656/Q86Y82/Q07954/P55058
M13593	GOBP_SMOOTH_MUSCLE_CONTRACTION	14	0.677159	1.77737	0.0218256	1	1	76	tags=14%, list=4%, signal=14%	O43293/P49747
M11174	GOBP_PROTEIN_MODIFICATION_BY_SMALL_PROTEIN_CONJUGATION_OR_REMOVAL	104	0.369676	1.4544	0.02186	1	1	283	tags=27%, list=16%, signal=24%	Q9NT62/Q13616/Q9UPU5/Q04206/Q96FW1/Q99816/Q96K76/Q15020/P54578/Q9UIQ6/O00571/P29590/P62913/P46777/P62841/Q5T447/Q7L5N1/Q9UNE7/Q93034/P61927/P15374/P61201/Q15370/P23396/P55072/Q13564/Q15018/O75340
M4229	SESTO_RESPONSE_TO_UV_C6	16	-0.652945	-1.60486	0.0225558	1	1	189	tags=50%, list=11%, signal=45%	Q13011/Q92522/Q14376/P10301/P24752/P14209/Q8N668/Q99798
M7623	HELLER_HDAC_TARGETS_SILENCED_BY_METHYLATION_DN	42	-0.501771	-1.51924	0.0232068	1	1	490	tags=45%, list=28%, signal=33%	P25685/P40306/P17655/Q03001/P31949/Q9BUJ2/Q9UDY4/P61604/Q15084/P04792/P55854/P29466/P51858/Q16629/Q16666/Q15005/P17302/Q8NBS9/O95817
M14356	GOBP_CELL_SURFACE_RECEPTOR_SIGNALING_PATHWAY_INVOLVED_IN_CELL_CELL_SIGNALING	57	0.444411	1.57328	0.0234802	1	1	195	tags=18%, list=11%, signal=16%	O43293/Q8N2Q7/Q9NZH0/Q96K76/Q16394/Q07954/O00571/O75581/P63000/Q96QK1
M1396	GOBP_MITOTIC_CELL_CYCLE	116	0.360481	1.44705	0.0235366	1	1	303	tags=24%, list=18%, signal=21%	O43293/Q13616/Q71UM5/Q7LG56/P53041/O95347/Q96K76/Q9HD42/Q14974/P43246/P62745/Q99538/O00571/P29590/P78527/P15927/Q9P258/Q93034/Q32P44/P36405/P55072/P50570/Q9Y6G9/Q13564/P62753/Q15018/P68366/Q00610
M17811	PASQUALUCCI_LYMPHOMA_BY_GC_STAGE_DN	21	0.5661	1.64442	0.0240861	1	1	153	tags=24%, list=9%, signal=22%	O00408/Q969G3/P60903/P52788/P55209
M15161	GOBP_STEROL_TRANSPORT	19	0.59972	1.71135	0.0252511	1	1	165	tags=37%, list=10%, signal=34%	P04114/P02656/Q86Y82/Q9NVJ2/Q07954/P55058/O75581
M34002	BLANCO_MELO_MERS_COV_INFECTION_MCR5_CELLS_UP	18	-0.62669	-1.61348	0.0256691	1	1	188	tags=28%, list=11%, signal=25%	Q9H4B7/P01008/Q16853/O95817/Q8TDI0
M11656	GOBP_PROTEIN_MODIFICATION_BY_SMALL_PROTEIN_REMOVAL	28	0.534451	1.64656	0.0285436	1	1	281	tags=36%, list=16%, signal=30%	Q9UPU5/Q96FW1/Q96K76/Q15020/P54578/Q7L5N1/P15374/P61201/P55072/Q15018
M13639	CORRE_MULTIPLE_MYELOMA_UP	12	0.693921	1.70878	0.0285615	1	1	2	tags=8%, list=0%, signal=8%	Q14624
M516	REACTOME_THE_CITRIC_ACID_TCA_CYCLE_AND_RESPIRATORY_ELECTRON_TRANSPORT	25	-0.57598	-1.60807	0.0290765	1	1	555	tags=72%, list=32%, signal=50%	P35613/P38117/P56385/P30049/P36957/P40926/P48163/O75390/P53985/P06576/P48735/P99999/O75947/P13073/Q99798/P21796/P13804/P50213
M23781	GOBP_RIBOSE_PHOSPHATE_BIOSYNTHETIC_PROCESS	43	-0.500447	-1.52281	0.0301168	1	1	262	tags=28%, list=15%, signal=24%	P06576/P22102/O75947/O43252/P11413/P00492/P15531/P24752/Q06203/P09874/P27708/Q9NVE7
M2620	ZWANG_EGF_INTERVAL_DN	12	0.688009	1.69422	0.0312816	1	1	94	tags=17%, list=5%, signal=16%	O43293/P62745
M5314	MILI_PSEUDOPODIA_HAPTOTAXIS_DN	141	-0.375479	-1.41296	0.0319377	1	1	418	tags=28%, list=24%, signal=23%	O14828/Q9BVK6/P14543/P21333/Q9UBR2/Q93050/P01889/P04062/Q8WTV0/P30626/P13667/P26006/Q14118/P16615/Q15084/O75369/P53985/Q9GZM7/P08236/P10253/P14314/O60568/Q93063/P13591/P08123/P98160/O96019/P20827/Q08174/P08572/Q9NX76/Q9UK23/Q9NS15/Q15005/P17302/O15031/P01034/P17405/Q9NVE7/O94973
M22625	GOBP_REGULATION_OF_SIGNALING_RECEPTOR_ACTIVITY	14	0.65313	1.7143	0.0322719	1	1	48	tags=21%, list=3%, signal=21%	Q8N2Q7/Q92769/Q99816
M724	REACTOME_RESPONSE_TO_ELEVATED_PLATELET_CYTOSOLIC_CA2	60	0.403152	1.45161	0.0328158	1	1	181	tags=17%, list=10%, signal=15%	Q14624/Q9NTK5/Q06033/P02787/P21926/P62328/P02765/P01023/P08962/P02768
M13486	KEGG_HUNTINGTONS_DISEASE	28	-0.549356	-1.56322	0.0340818	1	1	262	tags=36%, list=15%, signal=31%	P06576/P99999/O75947/Q9Y277/Q00059/P13073/P21796/P53680/Q9UJW0/O94973
M16347	WANG_PROSTATE_CANCER_ANDROGEN_INDEPENDENT	11	-0.717019	-1.63834	0.0356883	1	1	2	tags=45%, list=0%, signal=46%	Q03001/P16284/Q9UMS4/P51688/O94973
M18750	CAMPS_COLON_CANCER_COPY_NUMBER_UP	11	-0.715278	-1.63436	0.0361945	1	1	209	tags=45%, list=12%, signal=40%	Q9NQW7/Q14137/P46531/P13646/Q9NVE7
M17773	GOBP_CELL_CYCLE_PROCESS	143	0.324161	1.34143	0.0366826	1	1	281	tags=21%, list=16%, signal=19%	O43293/Q13616/Q71UM5/Q7LG56/O95347/Q96K76/Q9HD42/Q92599/Q14974/O75400/P43246/P62745/Q8N4N8/O00571/P29590/P78527/Q08J23/P15927/Q9P258/Q93034/Q32P44/P23396/P36405/P55072/P50570/Q9Y6G9/P15311/Q13564/P62753/Q15018
M10214	GOBP_RIBOSOME_BIOGENESIS	62	0.404564	1.47381	0.036792	1	1	332	tags=39%, list=19%, signal=32%	Q71UM5/O76021/O00571/Q13610/P78527/P62913/Q14146/P46777/P62841/P18077/P08708/P78345/P62906/P62851/P62750/P61353/P62753/Q9UNX3/P62424/O43818/P39023/P27635/P62847/Q9Y2X3
M3458	GOBP_DEFENSE_RESPONSE	206	0.291441	1.26844	0.0377823	1	1	205	tags=16%, list=12%, signal=16%	Q14624/O43293/O00408/Q04206/P78423/Q9NZH0/P05109/P02787/Q9NZ08/Q9NPH3/Q9NVJ2/P54578/P29317/Q16394/P62328/P08603/P07998/O00571/Q13151/P29590/P78527/P06702/P02765/P02786/P04003/P01023/P63000/O95373/P40429/O00161/Q96QK1/Q9UKK3/P26022
M2327	BILANGES_SERUM_SENSITIVE_GENES	21	0.533337	1.54925	0.0389683	1	1	296	tags=38%, list=17%, signal=32%	Q9NTK5/Q08257/P55209/Q9P258/P23526/P21810/P62906/Q16543
M1472	PETROVA_PROX1_TARGETS_DN	24	-0.570918	-1.57977	0.0403951	1	1	148	tags=29%, list=9%, signal=27%	P19022/P13598/P10124/Q92823/P04156/Q86SQ4/P13611
M6175	CAIRO_LIVER_DEVELOPMENT_DN	55	0.414354	1.46207	0.0421956	1	1	167	tags=18%, list=10%, signal=17%	Q14624/P04114/P05109/Q06033/P30837/Q07954/P08603/P06702/P02765/P01023
M10128	GOBP_NEGATIVE_REGULATION_OF_MAP_KINASE_ACTIVITY	10	-0.718061	-1.61064	0.042269	1	1	126	tags=40%, list=7%, signal=37%	P18031/P29508/P09211/P17405
M27	BENPORATH_MYC_TARGETS_WITH_EBOX	72	-0.428632	-1.43913	0.0427892	1	1	120	tags=14%, list=7%, signal=13%	P15531/P05091/Q15599/P09874/Q99798/P09211/P18085/P07902/P05362/P34059
M16895	GOBP_RECEPTOR_CLUSTERING	11	0.694225	1.70876	0.0431142	1	1	11	tags=18%, list=1%, signal=18%	Q8N2Q7/P01833
M42804	GOBP_MITOTIC_CELL_CYCLE_PHASE_TRANSITION	46	0.44023	1.52023	0.0431259	1	1	278	tags=30%, list=16%, signal=26%	Q13616/Q71UM5/Q7LG56/Q96K76/O00571/P29590/P78527/P15927/Q9P258/Q93034/P50570/Q9Y6G9/Q13564/P62753
M1683	DURCHDEWALD_SKIN_CARCINOGENESIS_UP	10	-0.717644	-1.6097	0.0432814	1	1	324	tags=60%, list=19%, signal=49%	Q9NZT1/Q13201/P40925/P24752/Q9NS15/Q9NVE7
M5301	KONDO_EZH2_TARGETS	36	-0.505339	-1.51489	0.0435459	1	1	267	tags=22%, list=15%, signal=19%	P02461/P21589/Q15746/P27658/Q7Z7G0/P29508/P17302/P34059
M10986	CHIANG_LIVER_CANCER_SUBCLASS_UNANNOTATED_DN	64	0.386133	1.41451	0.0435967	1	1	134	tags=14%, list=8%, signal=13%	Q9NYK5/Q9NT62/Q92747/P48723/Q9Y333/P60903/P43246/Q9BTY2/Q13151
M13922	GOBP_INTRINSIC_APOPTOTIC_SIGNALING_PATHWAY	52	0.418822	1.46675	0.0439353	1	1	176	tags=23%, list=10%, signal=21%	Q13616/Q71UM5/Q7LG56/P05109/Q96K76/P63241/P29317/O00571/P29590/P78527/P06702/Q93034
M2328	BILANGES_SERUM_AND_RAPAMYCIN_SENSITIVE_GENES	53	0.403118	1.41521	0.0444115	1	1	550	tags=57%, list=32%, signal=40%	P46777/P08708/P40429/P46783/P23396/P61247/P62266/P62851/P62753/P62910/P62424/P09960/Q07020/P62277/P62979/P27635/P62847/O15372/Q02878/P61254/P62081/P46778/P18124/P26641/P61313/P46779/P83731/P46776/P62249/P83881
M4270	KAYO_CALORIE_RESTRICTION_MUSCLE_DN	24	-0.563493	-1.55923	0.0451755	1	1	428	tags=50%, list=25%, signal=38%	P45880/P13647/Q92841/P12814/P06576/P40925/P43487/Q13011/P55084/P02458/P13073/Q8N668
M7876	CHEBOTAEV_GR_TARGETS_DN	11	-0.680582	-1.55509	0.0454545	1	1	255	tags=45%, list=15%, signal=39%	P08123/Q92823/Q6PCB0/O95967/Q14019
M9857	GOBP_CELLULAR_AMINO_ACID_METABOLIC_PROCESS	62	-0.443677	-1.46249	0.0457413	1	1	515	tags=44%, list=30%, signal=32%	P36957/Q00266/P30520/P49591/Q9Y285/P11586/Q13867/Q93088/P00352/O43776/P00367/P48507/O60568/P23634/P22102/Q16762/P26639/P31937/P49589/P24752/Q06203/P17174/P13804/O00469/P27708/P48506/Q9BTE6
M416	ANDERSEN_LIVER_CANCER_KRT19_UP	23	0.546127	1.62101	0.0461696	1	1	409	tags=65%, list=24%, signal=50%	Q8N392/P55209/P18077/P08708/Q13185/P40429/P78371/P61247/P62906/P62851/P39023/Q9Y2X3/P32969/P25398/P04080
M2780	REACTOME_SIGNALING_BY_ROBO_RECEPTORS	137	0.319023	1.31001	0.0463406	1	1	564	tags=50%, list=33%, signal=36%	Q71UM5/P62273/P50552/P62913/Q16401/P46777/P62841/P18077/P08708/P63000/P61927/P62244/P40429/P28065/P49207/Q15370/P46783/P23396/Q13200/P49721/P18621/P61247/P62266/P62906/P62851/P62750/P61353/P62753/P05387/P62910/Q9UNX3/P62424/Q07020/P62277/P39023/P62979/P27635/P62847/O00487/P62280/P51665/P32969/P25398/Q02878/P61254/P25789/P62081/P62854/P28072/P46778/Q9Y3U8/P55036/P18124/P35998/P30050/P61313/P46779/…
M16194	GOBP_REGULATION_OF_TISSUE_REMODELING	12	-0.669291	-1.58866	0.0486224	1	1	78	tags=33%, list=5%, signal=32%	Q9NS15/P17302/P35916/P01034
M19251	TIEN_INTESTINE_PROBIOTICS_6HR_UP	34	0.479215	1.53285	0.0487501	1	1	482	tags=59%, list=28%, signal=43%	P63241/P55209/P46777/P08708/P61247/P62266/P62750/P62753/P84243/P61769/P04406/P62847/P62280/P0DMV9/P11142/P62081/P02792/P62937/P00558/P26641
M6386	CREIGHTON_ENDOCRINE_THERAPY_RESISTANCE_4	42	-0.488017	-1.4776	0.0488189	1	1	73	tags=19%, list=4%, signal=19%	Q16762/Q16629/Q13451/O00151/P46926/P37268/O95817/P13611
M2137	GREGORY_SYNTHETIC_LETHAL_WITH_IMATINIB	29	-0.521126	-1.49539	0.0496795	1	1	323	tags=45%, list=19%, signal=37%	P30626/P68431/Q14444/P02461/Q15643/P0DP23/P62834/Q16666/P25311/P49589/P09972/O00469/Q10570

## Sheet: 40% O2
ID	Description	setSize	enrichmentScore	NES	pvalue	p.adjust	qvalue	rank	leading_edge	core_enrichment
M567	REACTOME_SRP_DEPENDENT_COTRANSLATIONAL_PROTEIN_TARGETING_TO_MEMBRANE	85	0.450374	1.7873	0.000397873	0.601894	0.601894	516	tags=54%, list=30%, signal=40%	P61011/Q71UM5/P50914/P46783/P40429/P47914/P39023/P18621/P18124/P62266/P62269/P61353/P46779/P27635/P49207/P84098/P62899/P62917/P04843/P61927/P26373/Q02878/P63220/P62906/P08708/P61313/P62829/P83881/P83731/P39019/P46777/Q07020/P62841/P23396/P42677/Q02543/P46781/P25398/Q9UHB9/P62979/P32969/P61254/P62241/P36578/P42766/P62888
M189	KEGG_RIBOSOME	77	0.460164	1.81116	0.000400081	0.601894	0.601894	516	tags=56%, list=30%, signal=41%	Q71UM5/P50914/P46783/P40429/P47914/P39023/P18621/P18124/P62266/P62269/P61353/P46779/P27635/P49207/P84098/P62899/P62917/P61927/P26373/Q02878/P63220/P62906/P08708/P61313/P62829/P83881/P83731/P39019/P46777/Q07020/P62841/P23396/P42677/Q02543/P46781/P25398/P62979/P32969/P61254/P62241/P36578/P42766/P62888
M39575	WP_ECTODERM_DIFFERENTIATION	20	-0.79026	-1.93831	0.000440088	0.601894	0.601894	70	tags=30%, list=4%, signal=29%	O00592/Q8N2Q7/P12644/O15294/O75051/Q92930
M999	HADDAD_T_LYMPHOCYTE_AND_NK_PROGENITOR_DN	10	0.821338	1.98865	0.000806129	0.673507	0.673507	91	tags=40%, list=5%, signal=38%	P05109/P36955/P08631/P01040
M39495	WP_CYTOPLASMIC_RIBOSOMAL_PROTEINS	75	0.454644	1.79031	0.000820749	0.673507	0.673507	516	tags=56%, list=30%, signal=41%	P50914/P46783/P40429/P47914/P39023/P18621/P18124/P62266/P62269/P61353/P46779/P27635/P49207/P84098/P62899/P62917/P61927/P26373/Q02878/P63220/P62906/P08708/P61313/P62829/P83881/P83731/P39019/P46777/Q07020/P62841/P23396/P42677/Q02543/P46781/P25398/P62979/P32969/P61254/P62241/P36578/P42766/P62888
M38994	REACTOME_SIGNALING_BY_BRAF_AND_RAF1_FUSIONS	26	-0.72333	-1.85091	0.00119122	0.799238	0.799238	65	tags=19%, list=4%, signal=19%	O43252/Q7KZF4/Q96PU8/P62834/P49407
M29813	REACTOME_RESPONSE_OF_EIF2AK4_GCN2_TO_AMINO_ACID_DEFICIENCY	81	0.421295	1.67247	0.00151041	0.799238	0.799238	516	tags=54%, list=30%, signal=40%	Q71UM5/P50914/P46783/P40429/P47914/P39023/P18621/P18124/P05198/P62266/P62269/P61353/P46779/P27635/P49207/P84098/P62899/P62917/P61927/P26373/Q02878/P63220/P62906/P08708/P61313/P62829/P83881/P83731/P39019/P46777/Q07020/P62841/P23396/P42677/Q02543/P46781/P25398/P62979/P32969/P61254/P62241/P36578/P42766/P62888
M12694	GOBP_PROTEIN_ACETYLATION	19	-0.761416	-1.84254	0.00165469	0.799238	0.799238	92	tags=26%, list=5%, signal=25%	P29590/Q9BXJ9/Q92769/O15294/P49407
M27626	REACTOME_ONCOGENIC_MAPK_SIGNALING	29	-0.706473	-1.85587	0.00175314	0.799238	0.799238	65	tags=17%, list=4%, signal=17%	O43252/Q7KZF4/Q96PU8/P62834/P49407
M11857	RODRIGUES_NTN1_TARGETS_DN	26	-0.708147	-1.81206	0.0021435	0.856719	0.856719	128	tags=27%, list=7%, signal=25%	Q08174/P05783/Q16658/P13646/Q13619/P49321/P50895
M27623	REACTOME_SIGNALING_BY_MODERATE_KINASE_ACTIVITY_BRAF_MUTANTS	20	-0.749358	-1.83799	0.00229683	0.856719	0.856719	5	tags=15%, list=0%, signal=15%	P05106/P62834/P49407
M15783	GOBP_RESPONSE_TO_CYTOKINE	130	0.345038	1.50369	0.00274129	0.919453	0.919453	165	tags=16%, list=10%, signal=16%	O43293/Q04206/P13716/P28482/Q16543/O60264/P61073/P46109/O60462/Q16394/P08631/Q01628/P07996/P48506/P78423/P62328/P05089/P55011/P12268/P19338/P40429
M27557	REACTOME_MAP2K_AND_MAPK_ACTIVATION	17	-0.760076	-1.81633	0.00330201	0.919453	0.919453	5	tags=18%, list=0%, signal=18%	P05106/P62834/P49407
M11028	ROVERSI_GLIOMA_COPY_NUMBER_UP	14	-0.766294	-1.74661	0.00351808	0.919453	0.919453	216	tags=43%, list=12%, signal=38%	P11117/Q16563/Q92556/Q92466/Q8N2Q7/P50895
M39329	WP_CALCIUM_REGULATION_IN_CARDIAC_CELLS	24	-0.706512	-1.78341	0.00360633	0.919453	0.919453	119	tags=29%, list=7%, signal=28%	P63104/P50148/P16615/P13861/P27797/P27348/P49407
M1401	BYSTROEM_CORRELATED_WITH_IL5_DN	11	-0.80679	-1.75866	0.00379921	0.919453	0.919453	48	tags=18%, list=3%, signal=18%	Q9UIG0/Q04637
M29556	REACTOME_EUKARYOTIC_TRANSLATION_ELONGATION	83	0.395585	1.57259	0.00409178	0.919453	0.919453	516	tags=53%, list=30%, signal=39%	Q71UM5/P50914/P46783/P40429/P47914/P39023/P29692/P18621/P18124/P62266/P62269/P61353/P46779/P27635/P49207/P84098/P62899/P62917/P61927/P26373/Q02878/P63220/P62906/P08708/P61313/P62829/P83881/P83731/P39019/P46777/Q07020/P62841/P23396/P42677/Q02543/P46781/P25398/P62979/P32969/P61254/P62241/P36578/P42766/P62888
M15586	GOBP_PROTEIN_ACYLATION	22	-0.715834	-1.78689	0.00453335	0.919453	0.919453	92	tags=23%, list=5%, signal=22%	P29590/Q9BXJ9/Q92769/O15294/P49407
M17034	REACTOME_INTEGRATION_OF_ENERGY_METABOLISM	21	-0.695771	-1.71154	0.00477957	0.919453	0.919453	119	tags=19%, list=7%, signal=18%	P50148/P13861/P67775/P62834
M2844	REACTOME_FORMATION_OF_FIBRIN_CLOT_CLOTTING_CASCADE	15	-0.770967	-1.78717	0.00529461	0.919453	0.919453	139	tags=27%, list=8%, signal=25%	P01008/P42785/Q9UNN8/P03952
M22854	GOBP_PEPTIDYL_LYSINE_ACETYLATION	17	-0.74964	-1.79139	0.00536243	0.919453	0.919453	92	tags=24%, list=5%, signal=22%	P29590/Q92769/O15294/P49407
M8880	MCBRYAN_PUBERTAL_BREAST_5_6WK_DN	30	-0.653708	-1.71595	0.00538157	0.919453	0.919453	269	tags=30%, list=16%, signal=26%	O75976/P68400/Q9NZN4/P31431/Q16658/Q09028/Q96PU8/O15294/Q04637
M3727	GOBP_CELL_PROJECTION_ASSEMBLY	68	-0.535312	-1.60734	0.00584602	0.919453	0.919453	196	tags=21%, list=11%, signal=19%	O15144/Q15019/P09758/P50570/P55290/Q16658/O00592/Q9P258/P07737/Q9NT62/Q8N2Q7/P10114/Q92930/P62834
M9709	TAVOR_CEBPA_TARGETS_UP	10	0.753548	1.82452	0.00590651	0.919453	0.919453	266	tags=60%, list=15%, signal=51%	P61073/P36955/Q92820/P05089/P26022/P06702
M10792	KEGG_MAPK_SIGNALING_PATHWAY	26	-0.674687	-1.72643	0.00592454	0.919453	0.919453	13	tags=23%, list=1%, signal=23%	P01137/P04792/P10301/P53041/P62834/P49407
M39597	WP_MAPK_SIGNALING_PATHWAY	26	-0.674687	-1.72643	0.00592454	0.919453	0.919453	13	tags=23%, list=1%, signal=23%	P01137/P04792/P10301/P53041/P62834/P49407
M39475	WP_MYOMETRIAL_RELAXATION_AND_CONTRACTION_PATHWAYS	25	-0.688321	-1.75286	0.00605051	0.919453	0.919453	119	tags=32%, list=7%, signal=30%	Q99439/P63104/P50148/P16615/P68032/P13861/P27348/P49407
M15418	GOBP_REGULATION_OF_ACTIN_CYTOSKELETON_REORGANIZATION	10	0.748878	1.81321	0.00675788	0.965055	0.965055	84	tags=30%, list=5%, signal=29%	O43293/Q96AP7/P08631
M9604	GOBP_POSITIVE_REGULATION_OF_PROTEIN_MODIFICATION_PROCESS	123	-0.481789	-1.53858	0.00682331	0.965055	0.965055	190	tags=14%, list=11%, signal=13%	P31431/P05106/Q9UBE0/P30040/Q7Z6Z7/Q15172/P29590/O75340/P67775/Q92769/P12644/P10114/O15294/Q04637/Q15435/P62834/P49407
M289	OISHI_CHOLANGIOMA_STEM_CELL_LIKE_DN	51	-0.589901	-1.69072	0.00705622	0.965055	0.965055	405	tags=43%, list=23%, signal=34%	P02461/Q15555/O95967/Q01995/Q6IBS0/P10301/P42892/P20908/P13598/Q99439/Q9UBP4/Q10588/Q7Z7G0/P05997/P49006/Q9UNN8/P09211/Q16853/P05091/Q9NVA2/Q96D15/P49407
M6386	CREIGHTON_ENDOCRINE_THERAPY_RESISTANCE_4	42	-0.595876	-1.65963	0.00762129	0.972858	0.972858	312	tags=24%, list=18%, signal=20%	Q16629/P20908/Q9UKK3/P37268/O00151/Q15172/Q9BY67/O95817/Q15435/O15460
M12410	GOBP_PROTEIN_MATURATION	57	-0.561733	-1.65286	0.00772709	0.972858	0.972858	115	tags=18%, list=7%, signal=17%	P35670/P29466/Q9BXJ9/P60903/P27797/P00736/P49747/Q9UBS4/O15294/P03952
M39456	WP_RAC1PAK1P38MMP2_PATHWAY	12	0.696616	1.76415	0.00799123	0.972858	0.972858	60	tags=25%, list=3%, signal=24%	Q04206/P28482/P43246
M1975	MIKKELSEN_IPS_LCP_WITH_H3K4ME3	10	0.736673	1.78366	0.00846062	0.972858	0.972858	127	tags=30%, list=7%, signal=28%	O43293/P35858/Q9BQT9
M15265	GOBP_RESPONSE_TO_INTERFERON_GAMMA	30	0.523744	1.71097	0.00869341	0.972858	0.972858	165	tags=23%, list=10%, signal=21%	O43293/Q16543/P08631/Q01628/P78423/P05089/P40429
M42720	GOBP_POSITIVE_REGULATION_OF_HISTONE_MODIFICATION	10	-0.804542	-1.72263	0.00870698	0.972858	0.972858	19	tags=40%, list=1%, signal=40%	Q9GZS3/P02545/O15294/P49407
M12752	GOBP_CANONICAL_WNT_SIGNALING_PATHWAY	32	0.489138	1.61655	0.00886862	0.972858	0.972858	133	tags=16%, list=8%, signal=15%	O43293/Q9NZH0/Q16394/P20339/Q96K76
M16033	YAO_TEMPORAL_RESPONSE_TO_PROGESTERONE_CLUSTER_8	11	-0.775486	-1.69042	0.00978529	0.972858	0.972858	4	tags=18%, list=0%, signal=18%	O75223/O15460
M5370	FONTAINE_FOLLICULAR_THYROID_ADENOMA_DN	14	-0.739066	-1.68455	0.00981153	0.972858	0.972858	233	tags=43%, list=13%, signal=37%	O75531/P21796/P06703/P52292/P60903/Q09028
M14803	GOBP_RESPONSE_TO_ARSENIC_CONTAINING_SUBSTANCE	10	0.726257	1.75844	0.0102698	0.972858	0.972858	117	tags=40%, list=7%, signal=38%	P13716/P36955/Q96QD8/P48506
M14526	GOBP_POSITIVE_REGULATION_OF_CANONICAL_WNT_SIGNALING_PATHWAY	15	0.661959	1.81135	0.010474	0.972858	0.972858	133	tags=20%, list=8%, signal=19%	O43293/Q9NZH0/Q96K76
M1921	REACTOME_REGULATION_OF_INSULIN_SECRETION	13	-0.756682	-1.70602	0.0111764	0.972858	0.972858	119	tags=23%, list=7%, signal=22%	P50148/P13861/P62834
M12428	MCBRYAN_PUBERTAL_BREAST_4_5WK_DN	42	-0.585593	-1.63099	0.011183	0.972858	0.972858	123	tags=21%, list=7%, signal=20%	P42765/P50570/Q9BVC6/Q16658/Q14112/Q09028/Q96PU8/O15294/Q04637
M14766	REACTOME_INTRINSIC_PATHWAY_OF_FIBRIN_CLOT_FORMATION	10	-0.797729	-1.70804	0.0112109	0.972858	0.972858	139	tags=30%, list=8%, signal=28%	P01008/P42785/P03952
M15144	GOBP_POSITIVE_REGULATION_OF_ERK1_AND_ERK2_CASCADE	29	-0.650477	-1.70877	0.0114074	0.972858	0.972858	58	tags=14%, list=3%, signal=14%	P31151/P12644/P62834/P49407
M42916	GOBP_CELLULAR_RESPONSE_TO_INTERFERON_GAMMA	27	0.537638	1.68618	0.0114459	0.972858	0.972858	165	tags=22%, list=10%, signal=20%	O43293/Q16543/P08631/P78423/P05089/P40429
M6796	GOBP_MONOVALENT_INORGANIC_CATION_HOMEOSTASIS	19	0.587797	1.70484	0.0120425	0.972858	0.972858	150	tags=26%, list=9%, signal=24%	Q9NUM4/P28482/Q16394/Q9UI12/P55011
M3026	CHUNG_BLISTER_CYTOTOXICITY_UP	27	-0.630492	-1.63458	0.0121007	0.972858	0.972858	247	tags=30%, list=14%, signal=26%	Q96KP4/P31431/Q9NR45/P14550/P51153/P38117/Q92466/Q15435
M6444	NUYTTEN_NIPP1_TARGETS_UP	75	-0.518326	-1.56696	0.0128666	0.972858	0.972858	346	tags=37%, list=20%, signal=31%	Q9UDY4/O15269/P21266/P48507/O95497/Q16666/P18031/P80723/O00469/Q07157/P63104/P30520/P50591/P62314/P50148/Q9BVC6/P29590/Q14112/O43286/P29466/O43813/O00592/O75340/Q9UNN8/O95817/Q96PU8/O15294/O15460
M2505	RATTENBACHER_BOUND_BY_CELF1	46	-0.579009	-1.64366	0.013424	0.972858	0.972858	243	tags=26%, list=14%, signal=23%	Q93052/P09467/P42025/Q92841/Q7Z6Z7/P52209/Q86Y82/O60502/Q16864/Q5T5P2/P10114/O75051
M15507	GOBP_POSITIVE_REGULATION_OF_WNT_SIGNALING_PATHWAY	19	0.583423	1.69215	0.013744	0.972858	0.972858	133	tags=16%, list=8%, signal=15%	O43293/Q9NZH0/Q96K76
M9826	VANTVEER_BREAST_CANCER_METASTASIS_DN	21	0.570663	1.71418	0.0140998	0.972858	0.972858	214	tags=38%, list=12%, signal=34%	Q86SQ4/Q9NQ30/Q04446/Q16394/Q92820/P00450/P27707/P17948
M4665	BAELDE_DIABETIC_NEPHROPATHY_DN	114	-0.48117	-1.52407	0.0144048	0.972858	0.972858	412	tags=36%, list=24%, signal=29%	P42224/Q9UPZ6/P02461/P13010/P27824/Q09328/Q9P0K7/O00622/P54727/P08174/O14980/P26006/P35579/Q12765/P20810/Q16270/O15031/Q5TAQ9/O00469/Q10589/P23381/P63104/Q93008/P31431/Q15019/P53999/P05090/Q92841/Q9H2G2/O00429/P16615/P29466/O43813/O00592/O43252/O75436/P00736/Q9NVA2/Q09028/P50895/P60981
M12739	GOBP_REGULATION_OF_NEURON_DIFFERENTIATION	20	-0.700591	-1.71838	0.0148554	0.972858	0.972858	59	tags=25%, list=3%, signal=24%	P46821/P27797/Q8N2Q7/P12644/Q04637
M14001	GOBP_REGULATION_OF_NOTCH_SIGNALING_PATHWAY	11	-0.757568	-1.65136	0.0148926	0.972858	0.972858	2	tags=18%, list=0%, signal=18%	Q96TA1/P49407
M15606	MARKEY_RB1_ACUTE_LOF_UP	59	-0.541714	-1.59684	0.0151629	0.972858	0.972858	94	tags=25%, list=5%, signal=25%	P48735/O75531/Q14393/P15559/Q9UBE0/P52292/P38117/Q92769/O00410/Q09028/Q6NY19/P49321/O15294/P53041/P60981
M16458	RIZ_ERYTHROID_DIFFERENTIATION	11	0.700991	1.75197	0.0152109	0.972858	0.972858	78	tags=27%, list=5%, signal=26%	Q969G3/Q9P2R3/O14979
M39323	WP_B_CELL_RECEPTOR_SIGNALING_PATHWAY	10	0.709366	1.71754	0.0152937	0.972858	0.972858	36	tags=30%, list=2%, signal=30%	Q04206/P28482/P46109
M13260	GOBP_APPENDAGE_DEVELOPMENT	18	-0.690512	-1.66738	0.0155618	0.972858	0.972858	145	tags=28%, list=8%, signal=26%	P02458/Q92769/P49747/P12644/O75051
M27013	REACTOME_TOLL_LIKE_RECEPTOR_TLR1_TLR2_CASCADE	16	0.621683	1.74368	0.0156152	0.972858	0.972858	73	tags=31%, list=4%, signal=30%	Q13616/Q04206/P05109/P28482/Q9Y6Y9
M8673	MARTINEZ_TP53_TARGETS_DN	117	-0.469356	-1.49345	0.0156644	0.972858	0.972858	160	tags=16%, list=9%, signal=16%	P17096/P23284/Q9NZR1/Q7Z6Z7/P84103/P52209/P49006/P16615/P61221/P60903/P68366/Q9P258/P27797/P09211/P00736/Q09028/Q96PU8/O75051/Q8IUD2
M24913	GOBP_EXOCYTIC_PROCESS	14	-0.72432	-1.65093	0.015754	0.972858	0.972858	78	tags=43%, list=5%, signal=41%	Q99719/Q9UNH7/P54920/P51153/Q8N2Q7/Q92930
M8349	MARCHINI_TRABECTEDIN_RESISTANCE_DN	22	-0.662866	-1.65467	0.0160368	0.972858	0.972858	267	tags=36%, list=15%, signal=31%	P68400/Q16270/O15031/Q12841/P27708/P55290/P27797/P50895
M1571	YAMAZAKI_TCEB3_TARGETS_DN	54	-0.555817	-1.61314	0.0161613	0.972858	0.972858	245	tags=24%, list=14%, signal=21%	P37268/P09661/P15121/P17096/P21796/P09936/P06703/P52292/P46821/P05091/O00410/P49321/O95433
M3737	PUIFFE_INVASION_INHIBITED_BY_ASCITES_UP	23	-0.666461	-1.67256	0.0161989	0.972858	0.972858	94	tags=35%, list=5%, signal=33%	P00558/P06733/P22102/P48507/P09661/P52292/Q04637/P50895
M7600	DOANE_RESPONSE_TO_ANDROGEN_UP	27	-0.620519	-1.60872	0.0163008	0.972858	0.972858	112	tags=15%, list=6%, signal=14%	Q13630/P27797/P50895/P49407
M11299	GOBP_PROTEIN_IMPORT	38	-0.587094	-1.61098	0.0169096	0.972858	0.972858	193	tags=26%, list=11%, signal=24%	P55735/O60684/P05090/Q92973/P52292/P29590/O95817/O00410/P12644/Q92930
M22545	GOBP_REGULATION_OF_G_PROTEIN_COUPLED_RECEPTOR_SIGNALING_PATHWAY	18	-0.685093	-1.6543	0.0172789	0.972858	0.972858	137	tags=17%, list=8%, signal=16%	Q9NZR1/P50570/P49407
M16537	GOBP_RESPONSE_TO_PURINE_CONTAINING_COMPOUND	16	-0.713497	-1.67464	0.0173632	0.972858	0.972858	191	tags=25%, list=11%, signal=22%	P30520/Q86X55/Q92769/P62834
M34022	BLANCO_MELO_BETA_INTERFERON_TREATED_BRONCHIAL_EPITHELIAL_CELLS_UP	42	-0.570292	-1.58838	0.0173853	0.972858	0.972858	211	tags=26%, list=12%, signal=24%	P50453/P31431/P50591/P05090/O43854/P29590/O00592/P00736/O60701/Q96PU8/Q92930
M13282	GOBP_REGULATION_OF_CELL_CYCLE_G1_S_PHASE_TRANSITION	20	-0.693383	-1.7007	0.0178054	0.972858	0.972858	92	tags=20%, list=5%, signal=19%	P29590/P67775/Q13619/Q04637
M39725	WP_TCELL_RECEPTOR_TCR_SIGNALING_PATHWAY	11	0.693697	1.73374	0.0180157	0.972858	0.972858	36	tags=27%, list=2%, signal=27%	Q04206/P28482/P46109
M15164	FAELT_B_CLL_WITH_VH3_21_UP	12	-0.78178	-1.73809	0.0180832	0.972858	0.972858	280	tags=58%, list=16%, signal=49%	P18031/P16435/P17096/P21796/P27797/P53041/Q04637
M2188	LI_DCP2_BOUND_MRNA	27	-0.61376	-1.5912	0.0185009	0.972858	0.972858	258	tags=30%, list=15%, signal=26%	P53680/P07741/P13798/P30519/P23284/P38117/Q9BXJ9/Q15435
M16176	GOBP_POSITIVE_REGULATION_OF_CELL_CYCLE_G1_S_PHASE_TRANSITION	10	-0.78089	-1.67199	0.0188725	0.972858	0.972858	54	tags=20%, list=3%, signal=19%	Q13619/Q04637
M24745	GOBP_RECEPTOR_LOCALIZATION_TO_SYNAPSE	10	-0.780181	-1.67047	0.0191012	0.972858	0.972858	29	tags=30%, list=2%, signal=30%	Q96QK1/Q8N2Q7/P62834
M9246	ENGELMANN_CANCER_PROGENITORS_DN	10	-0.779868	-1.6698	0.0191012	0.972858	0.972858	90	tags=30%, list=5%, signal=29%	P13646/O60701/P12644
M34008	BLANCO_MELO_RESPIRATORY_SYNCYTIAL_VIRUS_INFECTION_A594_CELLS_UP	42	-0.562785	-1.56747	0.0194545	0.972858	0.972858	347	tags=40%, list=20%, signal=33%	Q9NPH3/P08174/P05362/Q16666/Q6UXH8/O00469/Q10589/P23381/P31431/P05106/P50591/Q12841/P22303/Q14112/P29466/Q5T5P2/O15460
M12353	FONTAINE_PAPILLARY_THYROID_CARCINOMA_UP	16	-0.708609	-1.66316	0.0197656	0.972858	0.972858	240	tags=44%, list=14%, signal=38%	O15031/O00151/P05783/P06703/P52292/P60903/Q09028
M13335	GOBP_ACTOMYOSIN_STRUCTURE_ORGANIZATION	38	-0.57914	-1.58916	0.0197775	0.972858	0.972858	326	tags=39%, list=19%, signal=33%	Q8WUM4/P61586/P35579/Q92614/Q99439/Q07157/O00151/Q15942/P31431/P09758/Q9NZR1/P68032/P60903/P07737/P49407
M13839	GOBP_SIGNAL_RELEASE	38	-0.577614	-1.58497	0.0197775	0.972858	0.972858	116	tags=16%, list=7%, signal=15%	P16615/P08237/P55809/Q8N2Q7/Q92930/P62834
M4619	LIU_PROSTATE_CANCER_UP	15	-0.730813	-1.69409	0.0202913	0.972858	0.972858	237	tags=53%, list=14%, signal=46%	Q9UM54/P07741/P09467/P49006/Q9BY67/P14550/P27797/P50895
M40441	GOBP_ESTABLISHMENT_OF_PROTEIN_LOCALIZATION	287	-0.391992	-1.31835	0.0206059	0.972858	0.972858	197	tags=15%, list=11%, signal=16%	Q9NSC5/P55735/Q9UBE0/P30040/O60684/Q9H9H4/Q14699/P22303/P05090/O00429/Q7Z6Z7/Q86Y82/P50570/P05783/Q9UPT5/Q13637/Q92973/P52292/P29590/P08237/Q9NP79/P51153/P63010/P55809/O75340/Q9P258/P27797/O75436/P27348/O95817/Q9NT62/O00410/P49321/Q8N2Q7/P49747/P61966/P12644/P10114/Q96D15/Q92930/Q8IUD2/P49407
M15535	KIM_WT1_TARGETS_12HR_UP	31	-0.615692	-1.61211	0.0208015	0.972858	0.972858	166	tags=19%, list=10%, signal=18%	Q9H9H4/O60502/P51153/O00592/P68366/O15460
M16497	GOBP_NEGATIVE_REGULATION_OF_PROTEIN_MODIFICATION_PROCESS	82	-0.493784	-1.51349	0.0212028	0.972858	0.972858	144	tags=15%, list=8%, signal=14%	P09936/P50148/P26368/P13861/P67775/Q92769/P09211/O00410/P12644/O15294/Q04637/P49407
M1351	SCHAEFFER_PROSTATE_DEVELOPMENT_48HR_DN	37	-0.575506	-1.56403	0.0212278	0.972858	0.972858	113	tags=14%, list=7%, signal=13%	O43854/P55809/O43252/O15460/Q8IUD2
M13487	GOBP_RAS_PROTEIN_SIGNAL_TRANSDUCTION	58	-0.523236	-1.54053	0.0213193	0.972858	0.972858	141	tags=16%, list=8%, signal=15%	Q9UN86/P09467/Q92556/P50570/P55290/P10114/O15294/P62834/P49407
M10633	BASSO_B_LYMPHOCYTE_NETWORK	50	-0.549464	-1.56949	0.0222529	0.972858	0.972858	229	tags=18%, list=13%, signal=16%	O43493/Q15942/P09936/O60502/O43324/P46821/Q92466/O95433/Q04637
M11395	GOBP_REGULATION_OF_INTRACELLULAR_SIGNAL_TRANSDUCTION	219	-0.409808	-1.36089	0.0223256	0.972858	0.972858	253	tags=18%, list=15%, signal=17%	P35916/Q15493/P35968/Q10589/P63104/Q14393/P09467/P17844/Q10588/Q9NSC5/P55735/Q9Y4L1/Q99873/P50591/P30040/P02760/P09936/O00429/P50570/P55290/P29590/O43324/P29466/Q14146/O75340/P67775/P31151/P27797/Q13619/P09211/Q92499/Q8N2Q7/P12644/P10114/O15294/Q96D15/P53041/P62834/P49407
M39480	WP_BLOOD_CLOTTING_CASCADE	11	-0.741208	-1.6157	0.0235347	0.972858	0.972858	17	tags=18%, list=1%, signal=18%	P05121/P03952
M13413	GOBP_CELL_CYCLE_G1_S_PHASE_TRANSITION	31	-0.605964	-1.58664	0.0236848	0.972858	0.972858	161	tags=23%, list=9%, signal=21%	Q93034/Q07666/P29590/P67775/Q13619/P49321/Q04637
M12490	ONKEN_UVEAL_MELANOMA_UP	177	-0.426115	-1.39216	0.0239846	0.972858	0.972858	337	tags=27%, list=19%, signal=24%	O60216/P46063/Q8NBJ4/Q16629/P08236/Q14103/O00214/Q16666/P21283/P37802/Q10570/P80723/Q16270/P35968/P48735/Q9UM54/Q5TAQ9/P23381/P63104/P31949/O00151/P09661/P48637/O75131/P15559/O15144/Q15019/P05090/Q9NR45/P06703/P16615/Q9BY67/Q13630/Q92973/P52292/P29466/P15586/O43150/P55809/P27797/P07737/Q9UIG0/P00736/P49321/P61966/O15294/O15460/P49407
M2116	VERHAAK_GLIOBLASTOMA_NEURAL	14	-0.705995	-1.60917	0.0241353	0.972858	0.972858	131	tags=29%, list=8%, signal=27%	P80723/Q15172/O43854/P49407
M11393	GOBP_NEURAL_TUBE_DEVELOPMENT	19	-0.671407	-1.62473	0.0244098	0.972858	0.972858	257	tags=42%, list=15%, signal=36%	Q96CG8/P01137/Q86V48/O15031/P31431/P07737/P12644/O75051
M15091	GOBP_PROTEIN_LOCALIZATION_TO_SYNAPSE	10	-0.768701	-1.64589	0.0245981	0.972858	0.972858	29	tags=30%, list=2%, signal=30%	Q96QK1/Q8N2Q7/P62834
M27685	REACTOME_RRNA_PROCESSING	90	0.343442	1.36574	0.0247351	0.972858	0.972858	516	tags=57%, list=30%, signal=42%	P78345/Q71UM5/Q14137/Q8NI36/P50914/P19338/P46783/P40429/P47914/P39023/P18621/P18124/P62266/P62269/P61353/P46779/P27635/P49207/P84098/P62899/Q9NR30/P62917/P61927/P26373/Q02878/P63220/P62906/P08708/P61313/P62829/P83881/Q99848/P83731/P39019/P46777/Q07020/P62841/O60832/P23396/Q9H0D6/P42677/Q02543/P46781/P25398/P62979/P32969/P61254/P62241/P36578/P42766/P62888
M14377	GOBP_TUBE_FORMATION	19	-0.670934	-1.62359	0.0248418	0.972858	0.972858	377	tags=47%, list=22%, signal=37%	Q96CG8/P01137/Q86V48/O15031/P63104/P31431/O00592/P07737/P12644
M11875	GOBP_MEMBRANE_DOCKING	19	-0.670226	-1.62187	0.0252739	0.972858	0.972858	124	tags=21%, list=7%, signal=20%	Q86Y82/P16615/P51153/Q92930
M15870	GOBP_CELLULAR_MACROMOLECULE_LOCALIZATION	298	-0.3975	-1.34302	0.0254128	0.972858	0.972858	403	tags=28%, list=23%, signal=26%	P55854/P53621/O75915/P56377/Q15555/P50395/Q16643/P13010/O75608/Q99719/P51572/Q99570/Q92572/Q14254/P01137/Q15286/P04792/P27694/Q9UNH7/P19022/P36404/P51858/Q6IBS0/O14980/O60216/P26006/Q13596/P02545/Q8NHG7/P46060/O95782/P54920/P18031/Q9UK23/Q9NZN4/O14976/Q96QK1/P53680/Q9UM54/Q9UNZ2/O94979/P63104/Q14393/Q9NSC5/P55735/Q15019/Q9UBE0/P30040/P35052/O60684/Q9H9H4/Q14699/P05090/O00429/Q7Z6Z7/Q15172/Q86Y82/…
M92	PID_ANGIOPOIETIN_RECEPTOR_PATHWAY	11	0.678557	1.6959	0.025802	0.972858	0.972858	24	tags=18%, list=1%, signal=18%	Q04206/P28482
M12940	GOBP_POSITIVE_REGULATION_OF_PHOSPHORUS_METABOLIC_PROCESS	116	-0.461268	-1.46583	0.0260376	0.972858	0.972858	62	tags=7%, list=4%, signal=7%	P67775/Q92769/P12644/P10114/Q04637/Q15435/P62834/P49407
M2316	WIEDERSCHAIN_TARGETS_OF_BMI1_AND_PCGF2	12	-0.764136	-1.69887	0.0264123	0.972858	0.972858	70	tags=42%, list=4%, signal=40%	P26006/P20908/O00592/P46821/O15460
M24858	GOBP_REGULATION_OF_TRANS_SYNAPTIC_SIGNALING	43	-0.555559	-1.55423	0.026774	0.972858	0.972858	159	tags=14%, list=9%, signal=13%	P22303/P16615/P46821/Q8N2Q7/P62834/Q8IUD2
M15600	GOBP_LOCALIZATION_WITHIN_MEMBRANE	122	-0.458798	-1.4647	0.0268953	0.972858	0.972858	175	tags=16%, list=10%, signal=15%	P35052/Q9H9H4/Q14699/Q15172/P50570/P05783/Q9UPT5/P55290/Q13637/P51153/P63010/P60903/O75436/Q9NT62/Q8N2Q7/P10114/P01833/Q92930/P62834
M22998	GOBP_REGULATION_OF_HISTONE_MODIFICATION	20	-0.672385	-1.64919	0.0273165	0.972858	0.972858	19	tags=25%, list=1%, signal=25%	P01344/Q9GZS3/P02545/O15294/P49407
M16894	KEGG_COMPLEMENT_AND_COAGULATION_CASCADES	27	-0.601462	-1.55932	0.0275367	0.972858	0.972858	165	tags=19%, list=10%, signal=17%	P13987/P01008/P00736/P05156/P03952
M13893	GARY_CD5_TARGETS_DN	94	-0.471209	-1.46632	0.0276679	0.972858	0.972858	156	tags=24%, list=9%, signal=24%	Q14103/P21283/Q9BQA1/P62333/P80723/Q96KP4/Q07866/P23284/O15160/P84103/O60925/Q92973/P52292/O60502/P29466/P68366/Q13619/O60701/O00410/Q92499/P49321/Q9UBS4/O43818
M40323	GOBP_POSITIVE_REGULATION_OF_PROTEIN_PHOSPHORYLATION	92	-0.475065	-1.47611	0.0280159	0.972858	0.972858	62	tags=8%, list=4%, signal=8%	P67775/Q92769/P12644/P10114/Q04637/P62834/P49407
M34168	GOBP_STRESS_FIBER_ASSEMBLY	22	-0.641842	-1.60219	0.028073	0.972858	0.972858	224	tags=36%, list=13%, signal=32%	Q07157/O00151/Q15942/P31431/P09758/P60903/P07737/P49407
M6250	KORKOLA_YOLK_SAC_TUMOR	11	-0.728834	-1.58873	0.0281044	0.972858	0.972858	47	tags=36%, list=3%, signal=36%	P04004/P19022/P00736/O75051
M14907	GOBP_PROTEIN_DEPHOSPHORYLATION	42	-0.548391	-1.52738	0.0281427	0.972858	0.972858	131	tags=14%, list=8%, signal=14%	Q15172/Q15262/Q9ULE6/P67775/P53041/Q15435
M1103	GRAESSMANN_APOPTOSIS_BY_DOXORUBICIN_UP	152	-0.431173	-1.39673	0.028169	0.972858	0.972858	308	tags=24%, list=18%, signal=22%	P08236/Q16666/Q9C0C9/P21283/P42892/P54920/P18031/Q9UQ80/Q15493/O15031/Q10589/O43493/Q9UHG3/O00151/P48637/P42025/P15121/Q9H9H4/P17096/P07686/P49006/P50570/P29590/Q14112/P15586/O43813/P42785/P68366/Q9UNN8/Q13619/P05091/Q9NT62/P49747/P10114/P53041/O43818/P60981
M4779	IGARASHI_ATF4_TARGETS_DN	13	-0.721847	-1.62748	0.0282456	0.972858	0.972858	2	tags=15%, list=0%, signal=15%	Q92747/P49407
M13453	DER_IFN_BETA_RESPONSE_UP	36	-0.567826	-1.53365	0.0288901	0.972858	0.972858	260	tags=31%, list=15%, signal=27%	Q16666/Q9UKK3/P55084/O00469/Q10589/Q92841/P29590/P46821/Q92499/Q09028/P53041
M1410	SCHLOSSER_SERUM_RESPONSE_DN	163	-0.427731	-1.39195	0.0289079	0.972858	0.972858	412	tags=33%, list=24%, signal=28%	P42224/P21926/Q2M389/P39687/P00558/P13010/P27824/P01344/Q9Y277/P54727/Q12904/P08174/O15269/O60216/O75348/Q00325/Q16666/P21283/P13598/P62333/P52907/P20810/Q9UK23/P37268/P23381/P63104/O75643/P48723/P17844/O75131/O00232/P55735/P53999/P24534/Q16563/Q92556/Q9H2G2/P07686/P52209/Q86Y82/Q15262/P16615/P20042/P29466/O43813/O75340/Q13619/P27348/Q09028/O95498/O15294/P50895/P60981/P62834
M17454	MASSARWEH_TAMOXIFEN_RESISTANCE_UP	74	-0.490175	-1.47956	0.0290361	0.972858	0.972858	182	tags=18%, list=11%, signal=16%	P50591/Q14699/P05997/Q9NR45/P09758/Q5KU26/Q86Y82/P13646/P55809/Q96PU8/Q5T5P2/P50895/P49407
M19982	WAMUNYOKOLI_OVARIAN_CANCER_LMP_UP	52	-0.536416	-1.54502	0.0302922	0.972858	0.972858	273	tags=37%, list=16%, signal=32%	Q6IA69/P37268/Q9UM54/P16435/P48637/P15559/P25325/P50591/Q9H9H4/P13987/Q9NR45/P09758/P06703/Q13630/Q9BPX5/P38117/P68366/P09211/Q04637
M6659	FULCHER_INFLAMMATORY_RESPONSE_LECTIN_VS_LPS_UP	80	-0.483255	-1.48057	0.0303145	0.972858	0.972858	378	tags=31%, list=22%, signal=26%	Q9NPH3/Q9P0K7/P08174/Q5T4S7/P35579/Q96CN7/O00154/P37802/Q93052/P15559/Q15942/P05106/P53999/P30519/P00505/Q5KU26/P49006/Q9BPX5/P21399/Q16658/O43324/Q9UNN8/Q7KZF4/P10114/O15460
M1560	RASHI_RESPONSE_TO_IONIZING_RADIATION_6	12	0.638985	1.6182	0.0305004	0.972858	0.972858	289	tags=42%, list=17%, signal=35%	P05109/P61073/P07998/P06702/P09972
M1430	BROWN_MYELOID_CELL_DEVELOPMENT_UP	47	-0.53161	-1.51543	0.0308642	0.972858	0.972858	269	tags=32%, list=16%, signal=28%	O75976/Q99439/Q96KP4/P31949/O75131/P15559/Q15942/P01008/P07686/P52209/P06703/O43854/P06737/P15586/P60981
M40318	GOBP_MAPK_CASCADE	92	-0.473524	-1.47132	0.0311481	0.972858	0.972858	367	tags=26%, list=21%, signal=22%	P01344/P01137/O00622/P19022/P05362/P10301/P02787/P18031/P35916/P35968/P63104/Q13098/Q14393/Q99873/P30040/P02760/P09936/P31151/P09211/P12644/P10114/P53041/P62834/P49407
M3284	KUMAR_TARGETS_OF_MLL_AF9_FUSION	71	-0.503328	-1.51239	0.0312619	0.972858	0.972858	472	tags=39%, list=27%, signal=30%	P02788/P29508/O75874/O15173/Q86UX7/P15924/P21926/P07305/P06733/P08174/O14980/P08236/Q16666/P80723/P54802/O00151/P09467/P31431/Q9H3T3/P35052/P20042/P29590/Q9NP79/O75340/P00736/O60701/Q6NY19/P62834
M16031	GOBP_RIBOSOMAL_LARGE_SUBUNIT_BIOGENESIS	22	0.538505	1.6164	0.0313695	0.972858	0.972858	399	tags=55%, list=23%, signal=43%	Q14137/P50914/P39023/P18124/P27635/O76021/Q02878/P62906/Q99848/P83731/P46777/P56537
M11165	GOBP_REGULATION_OF_EXOCYTOSIS	31	-0.595147	-1.55832	0.0315109	0.972858	0.972858	190	tags=23%, list=11%, signal=20%	P31431/Q15019/P16615/P51153/Q8N2Q7/Q92930/P62834
M40049	WP_DNA_REPAIR_PATHWAYS_FULL_NETWORK	17	-0.692597	-1.65508	0.0315277	0.972858	0.972858	54	tags=24%, list=3%, signal=23%	Q13619/P35244/Q92466/P62834
M2881	REACTOME_LYSOSOME_VESICLE_BIOGENESIS	17	-0.691593	-1.65268	0.0323856	0.972858	0.972858	123	tags=24%, list=7%, signal=22%	P50570/P15586/P61966/P49407
M29278	GOBP_EPITHELIAL_TUBE_FORMATION	16	-0.683968	-1.60533	0.0327031	0.972858	0.972858	377	tags=50%, list=22%, signal=39%	Q96CG8/P01137/Q86V48/O15031/P31431/O00592/P07737/P12644
M42718	GOBP_GENE_SILENCING_BY_RNA	19	-0.657047	-1.58998	0.0330503	0.972858	0.972858	203	tags=26%, list=12%, signal=23%	P17844/Q92841/Q7KZF4/P12644/Q04637
M16921	GOBP_POSITIVE_REGULATION_OF_CELL_PROJECTION_ORGANIZATION	56	-0.522096	-1.53151	0.0330613	0.972858	0.972858	123	tags=16%, list=7%, signal=15%	P50570/Q16658/Q14444/P46821/P07737/Q8N2Q7/O75051/Q92930/P62834
M1493	NIKOLSKY_BREAST_CANCER_11Q12_Q14_AMPLICON	17	-0.690567	-1.65023	0.0332435	0.972858	0.972858	101	tags=24%, list=6%, signal=22%	Q9UBX1/Q9BVC6/P09211/P49407
M7494	REACTOME_TOLL_LIKE_RECEPTOR_CASCADES	23	0.515638	1.57047	0.0337563	0.972858	0.972858	73	tags=22%, list=4%, signal=21%	Q13616/Q04206/P05109/P28482/Q9Y6Y9
M18806	TOOKER_GEMCITABINE_RESISTANCE_DN	45	-0.530787	-1.49219	0.0337922	0.972858	0.972858	85	tags=27%, list=5%, signal=26%	P07305/P04792/P50213/P08174/P21283/O00469/P30040/Q14444/O00410/Q96PU8/O95433/O15460
M16677	GOBP_ERK1_AND_ERK2_CASCADE	48	-0.534256	-1.53004	0.0341695	0.972858	0.972858	58	tags=31%, list=3%, signal=31%	P01137/O00622/P05362/P10301/P02787/P18031/P35916/P35968/P63104/Q14393/P31151/P09211/P12644/P62834/P49407
M42804	GOBP_MITOTIC_CELL_CYCLE_PHASE_TRANSITION	46	-0.52867	-1.50076	0.0346535	0.972858	0.972858	161	tags=22%, list=9%, signal=20%	Q93034/Q13564/Q07666/P50570/P29590/P67775/Q9P258/Q13619/P49321/Q04637
M12824	SHEDDEN_LUNG_CANCER_GOOD_SURVIVAL_A4	24	-0.629543	-1.58913	0.0350946	0.972858	0.972858	347	tags=46%, list=20%, signal=37%	P08174/P09960/P05362/Q12765/Q00888/P09467/Q8IZF2/P05090/P53004/Q96PU8/P49407
M12912	GOBP_POSITIVE_REGULATION_OF_CELL_DIFFERENTIATION	125	-0.431972	-1.37808	0.0356745	0.972858	0.972858	486	tags=38%, list=28%, signal=30%	Q02750/Q9NR12/P55209/P00813/P02788/P29508/P36873/O94874/P08238/Q13547/P42224/Q9Y4D7/Q96TA1/O95967/Q16643/P13010/Q92823/Q96CG8/P01137/O00622/Q6IBS0/P61586/O95361/P10301/O95497/P35611/P53990/Q9UQ80/O00299/P35968/O15031/P16435/Q14393/O15144/Q99873/P35052/Q86X55/P09758/P50570/Q14444/P60903/Q92769/P46821/P27797/P12644/O75051/Q04637/P62834
M1806	BOCHKIS_FOXA2_TARGETS	77	-0.492332	-1.49569	0.0358639	0.972858	0.972858	291	tags=29%, list=17%, signal=25%	P01009/Q9UQ80/P02765/P37268/P48735/O00469/O75531/P09467/P02760/P26639/P24534/P02458/P01008/Q5KU26/Q13630/P13861/Q99983/P00736/P05156/Q9UBS4/P01833/P03952
M1757	SANSOM_APC_TARGETS_REQUIRE_MYC	22	-0.632192	-1.5781	0.0359749	0.972858	0.972858	138	tags=23%, list=8%, signal=21%	P27708/P22087/Q9P258/P49321/O43818
M14669	GOBP_MULTICELLULAR_ORGANISMAL_HOMEOSTASIS	79	-0.494985	-1.51163	0.0363605	0.972858	0.972858	187	tags=14%, list=11%, signal=13%	P05106/P15121/Q8IZF2/P22303/P02458/P42785/P49747/O15294/P01833/Q96D15/Q04637
M12004	SENESE_HDAC1_AND_HDAC2_TARGETS_DN	37	-0.554987	-1.50826	0.036418	0.972858	0.972858	250	tags=24%, list=14%, signal=21%	Q16270/P37268/O00151/Q12841/P35052/P05997/O43854/Q92769/P60981
M238	PID_THROMBIN_PAR1_PATHWAY	15	-0.698307	-1.61874	0.036815	0.972858	0.972858	325	tags=40%, list=19%, signal=33%	P61586/Q13596/Q15942/P50570/P50148/P49407
M15262	YAGI_AML_RELAPSE_PROGNOSIS	15	-0.697745	-1.61744	0.036815	0.972858	0.972858	340	tags=67%, list=20%, signal=54%	O14980/Q14103/Q86V48/Q10588/Q9NSC5/Q15942/P21796/P52209/Q13637/O15294
M23168	GOBP_COLLAGEN_BIOSYNTHETIC_PROCESS	14	-0.693529	-1.58075	0.0368189	0.972858	0.972858	60	tags=21%, list=3%, signal=21%	Q92769/P12644/Q96D15
M22825	GOBP_PROTEIN_PROCESSING	48	-0.522558	-1.49654	0.036855	0.972858	0.972858	84	tags=31%, list=5%, signal=31%	P00558/P07355/P06733/P35579/Q16666/P42892/P20810/O75976/Q6UXH8/P29466/P60903/P00736/P49747/O15294/P03952
M18740	GOBP_RHYTHMIC_PROCESS	48	-0.520821	-1.49156	0.036855	0.972858	0.972858	267	tags=29%, list=15%, signal=25%	Q14103/P68400/P54802/Q93008/P17844/P02771/O00429/Q7Z6Z7/P50148/P29590/Q92769/Q13619/Q8N2Q7/O15294
M22971	GOBP_REGULATION_OF_BONE_MINERALIZATION	13	-0.706019	-1.59179	0.0369822	0.972858	0.972858	63	tags=46%, list=4%, signal=45%	P01137/O00622/P02765/Q99983/P49747/P12644
M12444	GOBP_REGULATION_OF_CELL_PROJECTION_ORGANIZATION	96	-0.457846	-1.42628	0.0369942	0.972858	0.972858	196	tags=36%, list=11%, signal=34%	Q13275/Q04917/Q9Y4D7/P50395/Q16643/Q92823/Q9Y277/P19022/Q6IBS0/P27816/P05362/P61586/P26006/P53990/O14976/Q96QK1/O15031/O15144/Q9H3T3/Q86X55/P09758/P50570/Q16658/Q14444/O00592/Q9P258/Q92769/P46821/P07737/Q9NT62/Q8N2Q7/P10114/O75051/Q92930/P62834
M1110	GAUSSMANN_MLL_AF4_FUSION_TARGETS_A_UP	29	-0.599062	-1.57371	0.0375358	0.972858	0.972858	163	tags=21%, list=9%, signal=19%	P00505/Q7Z6Z7/P21399/Q92769/O75051/P34059
M10735	REACTOME_PLATELET_AGGREGATION_PLUG_FORMATION	12	-0.712561	-1.5842	0.0375375	0.972858	0.972858	5	tags=25%, list=0%, signal=25%	P18031/P05106/P62834
M15912	HAMAI_APOPTOSIS_VIA_TRAIL_DN	30	-0.576523	-1.51335	0.0378378	0.972858	0.972858	368	tags=33%, list=21%, signal=27%	P04908/P19022/P05362/O95361/Q92925/P37802/P09936/P05783/Q96D15/P49407
M1951	MEISSNER_NPC_HCP_WITH_H3K4ME2	36	-0.55397	-1.49623	0.0379085	0.972858	0.972858	220	tags=39%, list=13%, signal=35%	P07305/P07355/P37802/P31949/Q14393/O00151/P05106/Q14699/P17096/P22303/P02458/Q9UBX1/P49747/Q5T5P2
M34018	BLANCO_MELO_COVID19_SARS_COV_2_INFECTION_A594_ACE2_EXPRESSING_CELLS_RUXOLITINIB_UP	16	-0.664891	-1.56055	0.0379562	0.972858	0.972858	145	tags=25%, list=8%, signal=23%	P02458/P01008/Q16853/P01833
M2155	MCBRYAN_PUBERTAL_BREAST_6_7WK_UP	40	-0.540067	-1.4954	0.0381194	0.972858	0.972858	123	tags=28%, list=7%, signal=26%	Q8WUM4/P08236/O75976/P68400/Q9NZN4/P50570/Q16658/Q09028/Q96PU8/O15294/Q04637
M13691	GOBP_REGULATION_OF_REGULATED_SECRETORY_PATHWAY	14	-0.688954	-1.57033	0.0382916	0.972858	0.972858	116	tags=21%, list=7%, signal=20%	P16615/Q8N2Q7/P62834
M27595	REACTOME_DUAL_INCISION_IN_GG_NER	10	-0.742285	-1.58933	0.0383911	0.972858	0.972858	54	tags=40%, list=3%, signal=39%	P27694/Q13619/P35244/Q92466
M12707	MILI_PSEUDOPODIA_HAPTOTAXIS_UP	86	-0.453959	-1.40224	0.0384615	0.972858	0.972858	151	tags=14%, list=9%, signal=13%	Q13564/O00429/P84103/P20042/P51153/Q9BXJ9/Q92769/P46821/Q96PU8/Q92930/Q15435/P62834
M1966	MIKKELSEN_MEF_LCP_WITH_H3K4ME3	15	0.589513	1.61311	0.0385706	0.972858	0.972858	62	tags=13%, list=4%, signal=13%	O43293/P36955
M16865	GOBP_NEGATIVE_REGULATION_OF_PROTEIN_SERINE_THREONINE_KINASE_ACTIVITY	18	-0.657339	-1.58728	0.0387374	0.972858	0.972858	144	tags=28%, list=8%, signal=26%	P09936/P13861/P09211/O00410/P12644
M24615	GOBP_PROTEIN_LOCALIZATION_TO_PLASMA_MEMBRANE	59	-0.491619	-1.44917	0.039312	0.972858	0.972858	131	tags=29%, list=8%, signal=28%	O75915/O75608/Q14254/P01137/P19022/P26006/Q9NZN4/O14976/Q96QK1/Q14393/Q15172/P05783/P51153/P60903/P10114/Q92930/P62834
M27753	REACTOME_CLATHRIN_MEDIATED_ENDOCYTOSIS	51	-0.523144	-1.49939	0.0393171	0.972858	0.972858	324	tags=29%, list=19%, signal=25%	Q92747/P02787/O95782/O15145/O14976/P53680/O43493/Q9BT78/Q13098/O15144/P59998/Q96D71/P50570/P63010/P49407
M1696	WOOD_EBV_EBNA1_TARGETS_UP	47	-0.525242	-1.49728	0.0395062	0.972858	0.972858	511	tags=45%, list=30%, signal=32%	O75533/P50454/P10809/P07339/Q92522/P08133/Q16204/Q00796/P42224/Q15555/P05362/P48507/O95361/Q969T4/P15559/Q9Y4L1/P52209/O00592/O60701/O95817/Q04637
M1303	GROSS_HYPOXIA_VIA_ELK3_UP	51	-0.521839	-1.49564	0.0408148	0.972858	0.972858	119	tags=14%, list=7%, signal=13%	P50148/P13861/P52292/Q9ULE6/Q9P258/P12644/P49407
M34029	BLANCO_MELO_COVID19_SARS_COV_2_POS_PATIENT_LUNG_TISSUE_DN	12	-0.732486	-1.6285	0.0417628	0.972858	0.972858	262	tags=50%, list=15%, signal=43%	O14976/Q14393/P42025/O00592/P68366/O75051
M939	HADDAD_B_LYMPHOCYTE_PROGENITOR	34	-0.561953	-1.50345	0.0420499	0.972858	0.972858	146	tags=18%, list=8%, signal=16%	P21796/Q15262/Q14112/P68366/O75051/O15460
M16731	GOBP_REGULATION_OF_PROTEIN_TARGETING	10	-0.736741	-1.57746	0.0425291	0.972858	0.972858	183	tags=30%, list=11%, signal=27%	Q9UBE0/Q7Z6Z7/O95817
M14837	GOBP_REGULATION_OF_ATP_DEPENDENT_ACTIVITY	14	-0.684636	-1.56048	0.0427099	0.972858	0.972858	123	tags=36%, list=7%, signal=33%	Q15493/P50570/P07737/O95433/Q9UBS4
M4735	WANG_LMO4_TARGETS_UP	42	-0.530033	-1.47625	0.0427136	0.972858	0.972858	181	tags=17%, list=10%, signal=15%	P53999/Q16563/Q9BUJ2/P27797/O15294/P50895/P60981
M41836	REACTOME_CELLULAR_RESPONSE_TO_STARVATION	93	0.323534	1.29015	0.043738	0.972858	0.972858	516	tags=49%, list=30%, signal=37%	Q9UI12/Q71UM5/P50914/P46783/P40429/P47914/Q9P0V3/P39023/P18621/P18124/P05198/P62266/P62269/P61353/P46779/P27635/P49207/P84098/P62899/P62917/P61927/P26373/Q02878/P63220/P62906/P08708/P61313/P62829/P83881/P83731/P39019/P46777/Q07020/P62841/P23396/P42677/Q02543/P46781/P25398/P62979/P32969/P61254/P62241/P36578/P42766/P62888
M10764	GOBP_RESPONSE_TO_CORTICOSTEROID	32	0.424879	1.40418	0.0438505	0.972858	0.972858	240	tags=19%, list=14%, signal=16%	P35573/P13716/P36955/P05089/P12004/P61353
M2413	PEDERSEN_METASTASIS_BY_ERBB2_ISOFORM_7	61	-0.483289	-1.42477	0.0440636	0.972858	0.972858	494	tags=41%, list=29%, signal=30%	Q9Y6N5/Q9NR12/P55209/Q96EC8/Q92522/P12814/P18754/P08581/P42224/Q9Y4D7/P04908/P07355/P08174/P26006/O00469/Q969T4/P09467/Q9NSC5/P35052/P13987/P55809/Q9UNN8/Q13619/O15460/P49407
M19391	LIU_PROSTATE_CANCER_DN	90	-0.474701	-1.47765	0.0443661	0.972858	0.972858	370	tags=28%, list=21%, signal=23%	P78539/P01344/P07355/P04792/Q01995/P21266/Q12765/P20908/Q9NZN4/Q9UBP4/Q14393/O00151/P15121/P42765/P06703/P13646/P29466/P68366/P46821/P09211/Q16853/P00736/P05091/Q92466/P62834
M15370	GOBP_NEURAL_TUBE_FORMATION	13	-0.696191	-1.56964	0.0443787	0.972858	0.972858	377	tags=54%, list=22%, signal=42%	Q96CG8/P01137/Q86V48/O15031/P31431/P07737/P12644
M14322	GOBP_VASCULOGENESIS	13	-0.695059	-1.56708	0.0443787	0.972858	0.972858	33	tags=38%, list=2%, signal=38%	P01137/P10301/P35968/Q96PU8/P62834
M16243	GOBP_POSITIVE_REGULATION_OF_ATP_DEPENDENT_ACTIVITY	12	-0.727723	-1.61791	0.0444717	0.972858	0.972858	123	tags=42%, list=7%, signal=39%	Q15493/P50570/P07737/O95433/Q9UBS4
M40322	GOBP_REGULATION_OF_PROTEIN_PHOSPHORYLATION	140	-0.416701	-1.34294	0.044711	0.972858	0.972858	253	tags=16%, list=15%, signal=15%	P35916/Q15493/P35968/O15031/P23381/Q14393/Q10588/P31431/P05106/P30040/P09936/P50148/P13861/P29590/P67775/Q92769/P09211/O00410/P12644/P10114/Q04637/P62834/P49407
M14145	GOBP_REGULATION_OF_PROTEIN_IMPORT	12	-0.727533	-1.61749	0.0449232	0.972858	0.972858	157	tags=33%, list=9%, signal=31%	P05090/O95817/O00410/P12644
M2205	CHYLA_CBFA2T3_TARGETS_UP	45	-0.520246	-1.46256	0.0450563	0.972858	0.972858	220	tags=22%, list=13%, signal=20%	P31949/P09467/O75131/Q9NSC5/P05783/P29466/P27797/P00736/P03952/P60981
M13068	GOBP_ACTIN_FILAMENT_ORGANIZATION	96	-0.448381	-1.39679	0.0450867	0.972858	0.972858	325	tags=27%, list=19%, signal=23%	P61586/Q92747/Q8N392/P02787/P35611/O15145/P52907/Q9UM54/Q07157/O00151/O15144/Q15942/P31431/P59998/P09758/Q92556/Q9NZR1/P49006/Q9BPX5/P68032/Q16658/P60903/P07737/Q6NY19/P60981/P49407
M15491	HAN_SATB1_TARGETS_DN	63	-0.476475	-1.41149	0.0452323	0.972858	0.972858	364	tags=30%, list=21%, signal=25%	P01137/P19022/Q9UDY4/P26006/P02545/Q9Y333/Q92614/Q16270/Q9UM54/Q10589/Q9H9H4/P17096/O15160/Q9BUJ2/O43324/P29466/Q09028/Q9NVE7/P49407
M42929	GOBP_NITROGEN_COMPOUND_TRANSPORT	305	-0.371371	-1.25722	0.0454545	0.972858	0.972858	404	tags=27%, list=23%, signal=25%	Q2M389/P53621/O75915/P56377/P50395/O75608/P27824/P51572/Q99570/Q92572/Q9NTU7/P01137/Q15286/P04792/Q9UNH7/Q9Y277/Q12904/O14980/Q96KP1/Q8WUM4/Q13596/P35579/P02545/Q16629/Q8NHG7/P46060/O95782/P54920/P53990/Q92614/P18031/Q9UK23/Q96QK1/P53680/Q9UM54/O94979/P63104/Q14393/Q9UN86/Q9NSC5/P55735/P05106/Q9UBE0/P30040/O60684/Q9H9H4/Q14699/P22303/P05090/Q07666/O00429/Q7Z6Z7/P84103/Q86Y82/P50570/P05783/Q9UPT5/…
M17450	LIU_SOX4_TARGETS_UP	16	0.557348	1.56324	0.0455429	0.972858	0.972858	179	tags=31%, list=10%, signal=28%	Q7LG56/P07996/Q9UH65/Q14847/Q8TBC4
M13574	GOBP_REGULATION_OF_NEUROTRANSMITTER_TRANSPORT	11	-0.718143	-1.56542	0.0455927	0.972858	0.972858	187	tags=36%, list=11%, signal=33%	P05106/P16615/Q8N2Q7/P62834
M4090	BOYAULT_LIVER_CANCER_SUBCLASS_G3_DN	11	0.639137	1.59738	0.0457579	0.972858	0.972858	234	tags=55%, list=14%, signal=47%	P13716/P36955/P08603/Q96F15/P31153/P49748
M12949	GOBP_RESPONSE_TO_CAMP	12	-0.700533	-1.55746	0.0465465	0.972858	0.972858	5	tags=17%, list=0%, signal=17%	Q86X55/P62834
M13668	GOBP_REGULATION_OF_INTRACELLULAR_PROTEIN_TRANSPORT	32	-0.557624	-1.47438	0.0472335	0.972858	0.972858	381	tags=41%, list=22%, signal=32%	P51572/P01137/O14980/Q8NHG7/P46060/P18031/Q14393/Q9UBE0/P05090/Q7Z6Z7/O95817/O00410/P12644
M11433	GOBP_CIRCADIAN_REGULATION_OF_GENE_EXPRESSION	13	-0.691192	-1.55836	0.0473373	0.972858	0.972858	133	tags=31%, list=8%, signal=29%	Q7Z6Z7/P29590/Q92769/O15294
M13293	GOBP_ELECTRON_TRANSPORT_CHAIN	19	-0.642273	-1.55423	0.0474138	0.972858	0.972858	225	tags=32%, list=13%, signal=28%	P16435/P15121/Q13630/P38117/P05091/O15460
M2338	KIM_TIAL1_TARGETS	11	0.635379	1.58799	0.047501	0.972858	0.972858	215	tags=45%, list=12%, signal=40%	Q969G3/P53602/P04080/Q9NRY6/P34897
M1106	GRAESSMANN_RESPONSE_TO_MC_AND_DOXORUBICIN_UP	87	-0.468959	-1.44997	0.0476566	0.972858	0.972858	342	tags=30%, list=20%, signal=25%	Q6IBS0/Q9GZS3/P08236/Q9C0C9/P42892/P54920/P18031/O15031/O43493/Q9UHG3/O00151/P48637/P15121/P07686/P50570/Q14112/P15586/O43813/P42785/P68366/Q9UNN8/Q13619/P05091/Q9NT62/P10114/P53041
M27	BENPORATH_MYC_TARGETS_WITH_EBOX	72	-0.469757	-1.41393	0.0477327	0.972858	0.972858	101	tags=10%, list=6%, signal=10%	Q9UBX1/P14550/P09211/P05091/P12644/P34059/Q15435
M8144	KRIGE_RESPONSE_TO_TOSEDOSTAT_6HR_UP	123	-0.424502	-1.35564	0.0477778	0.972858	0.972858	279	tags=23%, list=16%, signal=21%	P20810/Q9HBI1/Q9UQ80/Q16270/Q93052/P23381/Q93008/P48723/Q10588/P15559/O15212/Q99873/P42765/P13987/P22087/P52209/Q13637/O60502/P29590/P15586/Q9BXJ9/Q92466/P20933/P49321/P10114/O15294/Q92930/P49407
M29565	REACTOME_MYD88_INDEPENDENT_TLR4_CASCADE	12	0.614404	1.55595	0.0478785	0.972858	0.972858	73	tags=33%, list=4%, signal=32%	Q13616/Q04206/P28482/Q9Y6Y9
M43011	GOBP_POSITIVE_REGULATION_OF_MITOTIC_CELL_CYCLE_PHASE_TRANSITION	12	-0.69862	-1.55321	0.048048	0.972858	0.972858	61	tags=25%, list=4%, signal=24%	Q9P258/Q13619/Q04637
M42686	GOBP_HISTONE_MODIFICATION	52	-0.521309	-1.5015	0.0481842	0.972858	0.972858	186	tags=19%, list=11%, signal=18%	Q99873/Q86X55/Q7Z6Z7/P22087/Q92769/Q9UIG0/Q92466/Q09028/O15294/P49407
M11130	GOBP_GLIAL_CELL_DEVELOPMENT	22	0.514082	1.54309	0.0485285	0.972858	0.972858	103	tags=18%, list=6%, signal=17%	Q86SQ4/P05109/Q9NR50/Q13144
M1298	GROSS_ELK3_TARGETS_UP	12	-0.721343	-1.60373	0.0485484	0.972858	0.972858	25	tags=33%, list=1%, signal=33%	O75976/Q99439/P12644/P49407
M1521	WESTON_VEGFA_TARGETS_6HR	14	-0.676638	-1.54225	0.0486009	0.972858	0.972858	207	tags=43%, list=12%, signal=38%	P09467/P31431/P50591/P05783/Q14112/P12644
M1310	GOBP_NEGATIVE_REGULATION_OF_SECRETION	18	-0.639494	-1.54419	0.0487805	0.972858	0.972858	5	tags=11%, list=0%, signal=11%	P30040/P62834
M8141	GOBP_REGULATION_OF_RAS_PROTEIN_SIGNAL_TRANSDUCTION	24	-0.611211	-1.54285	0.0488328	0.972858	0.972858	19	tags=17%, list=1%, signal=17%	P09467/P50570/O15294/P49407
M42745	GOBP_CELLULAR_RESPONSE_TO_STRESS	225	-0.39196	-1.30194	0.0488565	0.972858	0.972858	399	tags=28%, list=23%, signal=24%	O75915/P00558/P13010/P27824/P51572/Q99570/P78539/P04792/P27694/P06733/P54727/O60216/P21266/P46063/P61586/P02545/O95497/Q16666/Q8NHG7/P61978/P62333/O95747/P18031/Q9UKK3/P35916/Q9UM54/Q13098/Q14393/P48723/P17844/P15559/Q9Y4L1/Q99873/P30040/P15121/P42765/P02760/P17096/P05090/Q7Z6Z7/Q15262/P16615/Q9BVC6/P29590/O43324/O43813/O75340/Q92769/P46821/P27797/Q13619/P09211/Q9UIG0/P35244/Q92466/O95817/Q92499/…
M17904	GOBP_REGULATION_OF_PROTEIN_MODIFICATION_PROCESS	196	-0.399666	-1.31457	0.0488842	0.972858	0.972858	253	tags=16%, list=15%, signal=15%	P35916/Q15493/P35968/O15031/P23381/Q14393/Q10588/P31431/P05106/Q9UBE0/P30040/P23284/P09936/Q7Z6Z7/Q15172/P50148/P26368/P13861/P29590/O75340/P67775/Q92769/P09211/O00410/P12644/P10114/O15294/Q04637/Q15435/P62834/P49407
M10925	GOBP_POSITIVE_REGULATION_OF_NEURON_DIFFERENTIATION	10	-0.724983	-1.55228	0.0489297	0.972858	0.972858	59	tags=30%, list=3%, signal=29%	P46821/P12644/Q04637
M11891	MONNIER_POSTRADIATION_TUMOR_ESCAPE_UP	79	-0.453018	-1.38347	0.0490654	0.972858	0.972858	213	tags=19%, list=12%, signal=17%	Q9UN86/P42025/P15559/P15121/P35052/P17096/P52209/P49006/P16615/P61221/Q9BXJ9/P42785/Q14146/Q92930/Q04637
M29062	GOBP_NEUROTRANSMITTER_SECRETION	12	-0.694248	-1.54349	0.0495495	0.972858	0.972858	116	tags=25%, list=7%, signal=23%	P16615/Q8N2Q7/P62834
M11889	GOBP_REGULATION_OF_VESICLE_MEDIATED_TRANSPORT	108	-0.432622	-1.36728	0.0497175	0.972858	0.972858	303	tags=21%, list=18%, signal=19%	P61978/P02787/Q92614/P18031/Q9NZN4/P53680/Q99439/P02765/Q14393/P31431/Q15019/P05106/P50570/P16615/P55290/P51153/P63010/P27797/Q9NT62/Q8N2Q7/Q92930/P62834/P49407

## Sheet: 95% O2
ID	Description	setSize	enrichmentScore	NES	pvalue	p.adjust	qvalue	rank	leading_edge	core_enrichment
M10156	BEGUM_TARGETS_OF_PAX3_FOXO1_FUSION_UP	10	-0.898897	-1.66976	0.000386029	0.914666	0.914666	19	tags=40%, list=1%, signal=40%	P21589/Q9GZX9/Q9Y371/Q99983
M14783	GOBP_PROTEIN_LOCALIZATION_TO_CELL_SURFACE	10	-0.891235	-1.65552	0.000612684	0.914666	0.914666	11	tags=30%, list=1%, signal=30%	P08238/O14907/Q8N668
M15768	GOBP_OLIGODENDROCYTE_DIFFERENTIATION	18	-0.827545	-1.66812	0.000668779	0.914666	0.914666	62	tags=28%, list=4%, signal=27%	P10909/Q9UI10/Q13144/P46531/O43286
M10362	GOBP_REGULATION_OF_PROTEASOMAL_UBIQUITIN_DEPENDENT_PROTEIN_CATABOLIC_PROCESS	28	-0.750546	-1.6653	0.0022247	1	1	135	tags=25%, list=8%, signal=23%	O94874/Q15370/Q9UHD9/O15294/Q93009/Q8N668/P54727
M18387	KORKOLA_SEMINOMA_UP	11	-0.85523	-1.62195	0.00295496	1	1	64	tags=27%, list=4%, signal=26%	P46063/O75581/Q8IUD2
M2372	IKEDA_MIR1_TARGETS_UP	19	0.679546	1.81655	0.00319243	1	1	114	tags=37%, list=7%, signal=35%	Q8TDQ7/Q9NZH0/Q9ULV4/P48444/Q15417/P19338/Q9NZV1
M12176	CAIRO_HEPATOBLASTOMA_CLASSES_DN	37	0.552369	1.75905	0.00431904	1	1	261	tags=35%, list=15%, signal=30%	Q14624/Q6NY19/Q15746/Q71UM5/Q14393/Q92743/P09525/P40189/Q07157/P24043/P00736/P55209/Q9UBX1
M13872	GOBP_REGULATION_OF_PROTEASOMAL_PROTEIN_CATABOLIC_PROCESS	42	-0.685837	-1.60908	0.00442243	1	1	135	tags=19%, list=8%, signal=18%	O94874/Q06323/Q15370/Q9UHD9/O15294/Q93009/Q8N668/P54727
M1845	RAY_TUMORIGENESIS_BY_ERBB2_CDC25A_DN	27	-0.745037	-1.63319	0.00463533	1	1	87	tags=26%, list=5%, signal=25%	Q9P258/Q99848/P52943/O60684/P46531/P15927/P01034
M27742	REACTOME_PROTEIN_UBIQUITINATION	15	-0.798988	-1.56263	0.00547968	1	1	59	tags=20%, list=3%, signal=19%	Q8N7H5/Q969T4/Q93009
M16056	GOBP_POSITIVE_REGULATION_OF_VIRAL_PROCESS	16	-0.789451	-1.55863	0.00589651	1	1	44	tags=31%, list=3%, signal=31%	Q02880/P52292/O60684/P46531/Q9H9H4
M10934	GOBP_HISTONE_METHYLATION	19	-0.782852	-1.60793	0.00623741	1	1	75	tags=26%, list=4%, signal=25%	Q99873/Q13610/O15294/Q8TDI0/Q8N7H5
M4076	REACTOME_HIV_LIFE_CYCLE	25	-0.736388	-1.59859	0.00705944	1	1	157	tags=20%, list=9%, signal=18%	P19388/Q15370/Q9H9H4/Q9NP79/P43487
M16176	GOBP_POSITIVE_REGULATION_OF_CELL_CYCLE_G1_S_PHASE_TRANSITION	10	-0.843984	-1.56775	0.00733962	1	1	59	tags=30%, list=3%, signal=29%	P35241/Q8N7H5/Q04637
M29619	REACTOME_CHROMATIN_MODIFYING_ENZYMES	28	-0.714859	-1.58612	0.00757536	1	1	84	tags=21%, list=5%, signal=21%	Q04206/O96019/O15294/Q9BQA1/O00422/Q92925
M13743	GOBP_REGULATION_OF_PROTEIN_CATABOLIC_PROCESS	92	-0.581942	-1.45967	0.0083647	1	1	135	tags=13%, list=8%, signal=13%	O94874/Q06323/Q15370/P37840/Q9UHD9/Q04206/O15294/Q13596/Q93009/Q8N668/P54727/P01034
M14693	VANTVEER_BREAST_CANCER_POOR_PROGNOSIS	11	0.749623	1.73735	0.00866666	1	1	248	tags=64%, list=14%, signal=55%	Q86SQ4/P55809/Q16394/Q5JRX3/Q9NQ30/P27707/P21266
M11825	BRUECKNER_TARGETS_OF_MIRLET7A3_DN	32	0.535273	1.58849	0.00890788	1	1	108	tags=25%, list=6%, signal=24%	Q9NZH0/O60462/Q9ULV4/Q14019/P78344/Q7L1Q6/P55010/Q14847
M42538	WP_NUCLEOTIDE_EXCISION_REPAIR_IN_XERODERMA_PIGMENTOSUM	14	-0.800399	-1.54088	0.00949893	1	1	25	tags=29%, list=1%, signal=28%	Q13098/P15927/Q93009/P54727
M6557	GOBP_ACUTE_INFLAMMATORY_RESPONSE	19	0.631975	1.68939	0.0105153	1	1	241	tags=42%, list=14%, signal=37%	Q14624/P03952/Q16394/P02786/P05109/P40189/P01024/P19320
M690	REACTOME_KERATAN_SULFATE_KERATIN_METABOLISM	10	-0.83085	-1.54335	0.0117318	1	1	24	tags=30%, list=1%, signal=30%	P51884/O43286/Q99983
M12729	GOBP_REGULATION_OF_CATABOLIC_PROCESS	178	-0.526073	-1.36377	0.0119776	1	1	310	tags=24%, list=18%, signal=22%	P10909/O43847/P68104/P18669/P52272/Q15493/P27361/P05067/P04792/P23634/P35241/Q9H2J4/Q9UL46/P62913/O60506/O00391/O75534/P62136/P67809/P07355/P21283/O60832/P21796/P40763/O94874/Q06323/Q15370/P37840/Q9UHD9/Q04206/P09936/O15294/Q9UI12/Q13596/P62140/Q04637/Q14694/Q93009/Q9Y371/Q8N668/P54727/P01034
M16191	GOBP_PEPTIDYL_LYSINE_METHYLATION	14	-0.791677	-1.52409	0.0126162	1	1	75	tags=43%, list=4%, signal=41%	Q14166/P02545/P16403/Q13610/O15294/Q8TDI0
M13722	GOBP_REGULATION_OF_GLUCOSE_METABOLIC_PROCESS	11	-0.811697	-1.53939	0.0130737	1	1	72	tags=45%, list=4%, signal=44%	Q15493/P62136/O15294/P62140/Q93009
M14849	GOBP_REGULATION_OF_CYSTEINE_TYPE_ENDOPEPTIDASE_ACTIVITY	41	0.455194	1.4751	0.0133472	1	1	347	tags=39%, list=20%, signal=32%	Q96K76/O75146/P20810/Q99538/Q71UM5/Q14393/P05109/P29590/Q15041/O75340/P55072/P50591/P07996/P61586/O75915/P29279
M27698	REACTOME_DNA_DAMAGE_BYPASS	11	-0.808563	-1.53345	0.0137558	1	1	26	tags=27%, list=2%, signal=27%	P27694/Q14694/P15927
M14526	GOBP_POSITIVE_REGULATION_OF_CANONICAL_WNT_SIGNALING_PATHWAY	15	0.633122	1.58922	0.0137802	1	1	221	tags=27%, list=13%, signal=23%	Q9NZH0/Q96K76/P01137/P55072
M22416	GOBP_PROTEIN_METHYLATION	25	-0.71474	-1.5516	0.0139956	1	1	75	tags=20%, list=4%, signal=19%	Q99873/Q13610/O15294/Q8TDI0/Q8N7H5
M5618	TURASHVILI_BREAST_DUCTAL_CARCINOMA_VS_LOBULAR_NORMAL_DN	12	0.68697	1.64622	0.0142145	1	1	126	tags=25%, list=7%, signal=23%	P01833/Q15746/P78423
M3889	ZHAN_MULTIPLE_MYELOMA_CD1_AND_CD2_UP	10	0.729618	1.66271	0.0148665	1	1	184	tags=40%, list=11%, signal=36%	Q96PU8/O60264/P62328/P27707
M25432	GOBP_REGULATION_OF_UBIQUITIN_DEPENDENT_PROTEIN_CATABOLIC_PROCESS	36	-0.676212	-1.55689	0.0158099	1	1	135	tags=19%, list=8%, signal=18%	O94874/Q15370/Q9UHD9/O15294/Q93009/Q8N668/P54727
M101	PID_HDAC_CLASSI_PATHWAY	13	-0.786817	-1.51162	0.0161342	1	1	138	tags=31%, list=8%, signal=29%	P40763/Q04206/Q9BQA1/O00422
M34210	GOBP_MODULATION_BY_HOST_OF_SYMBIONT_PROCESS	13	0.690356	1.69336	0.0161388	1	1	164	tags=23%, list=9%, signal=21%	P51151/P52926/P26022
M13636	GOBP_CELLULAR_RESPONSE_TO_DNA_DAMAGE_STIMULUS	83	-0.578236	-1.4396	0.0165624	1	1	135	tags=17%, list=8%, signal=16%	O94874/Q9UIG0/P45973/Q6IN85/Q7LG56/O96019/P36915/O60216/Q14694/P15927/Q93009/Q13185/Q8N668/P54727
M22411	GOBP_RNA_EXPORT_FROM_NUCLEUS	15	0.62481	1.56835	0.0168424	1	1	82	tags=27%, list=5%, signal=26%	Q9UMR2/Q9HAV4/Q8NI27/Q08J23
M14698	HOEBEKE_LYMPHOID_STEM_CELL_UP	15	0.622645	1.56292	0.0173135	1	1	1	tags=7%, list=0%, signal=7%	Q14624
M2904	SUNG_METASTASIS_STROMA_DN	12	0.675813	1.61948	0.0174697	1	1	191	tags=42%, list=11%, signal=37%	Q9UKK3/P52597/P33992/O00567/Q14767
M22657	GOBP_REGULATION_OF_CELLULAR_CARBOHYDRATE_METABOLIC_PROCESS	15	-0.766442	-1.49898	0.0177741	1	1	200	tags=60%, list=12%, signal=54%	P01344/P18669/Q15493/P62136/P40763/P37840/O15294/P62140/Q93009
M15507	GOBP_POSITIVE_REGULATION_OF_WNT_SIGNALING_PATHWAY	19	0.600993	1.60657	0.0179445	1	1	11	tags=11%, list=1%, signal=11%	Q9NZH0/Q96K76
M4925	STEARMAN_LUNG_CANCER_EARLY_VS_LATE_UP	25	0.554358	1.55685	0.0181993	1	1	190	tags=28%, list=11%, signal=25%	Q14624/P20810/Q16394/Q92743/Q92896/Q9UK55/Q06481
M10125	GOBP_CHROMOSOME_ORGANIZATION	118	-0.544483	-1.39355	0.0191435	1	1	107	tags=13%, list=6%, signal=13%	Q9UIG0/P45973/Q04206/O96019/O15294/Q8TDI0/Q8N7H5/Q32P44/O95347/O60216/Q15185/P15927/Q93009/Q13185/Q92925
M5075	SCHLOSSER_MYC_TARGETS_REPRESSED_BY_SERUM	60	-0.599729	-1.45455	0.0195669	1	1	301	tags=27%, list=17%, signal=23%	P18669/P26639/P05067/P99999/Q01081/P00492/Q15084/P52292/P50213/P05198/O96019/Q13610/Q15185/Q14694/Q13185/P43487
M2426	LOPEZ_TRANSLATION_VIA_FN1_SIGNALING	13	0.676163	1.65855	0.0200911	1	1	314	tags=54%, list=18%, signal=44%	Q9NSC5/P53041/P39687/P26599/P07996/P49756/Q12906
M27601	REACTOME_DUAL_INCISION_IN_TC_NER	11	-0.79479	-1.50733	0.0201219	1	1	157	tags=27%, list=9%, signal=25%	P19388/P15927/Q93009
M17705	GOBP_POSITIVE_REGULATION_OF_CELL_CYCLE	39	-0.653889	-1.51949	0.0206324	1	1	83	tags=18%, list=5%, signal=17%	Q9P258/Q7LG56/O75581/Q8N7H5/O60216/Q04637/P43487
M19751	MORI_SMALL_PRE_BII_LYMPHOCYTE_UP	12	-0.782773	-1.48647	0.0209995	1	1	136	tags=25%, list=8%, signal=23%	P23467/Q9NQW7/O14907
M25418	GOBP_RESPONSE_TO_LEUKEMIA_INHIBITORY_FACTOR	18	0.621473	1.65429	0.0212495	1	1	100	tags=39%, list=6%, signal=37%	O43324/O60462/O60264/Q16394/P02786/P29590/P19338
M13340	GOBP_POSITIVE_REGULATION_OF_CELL_CYCLE_PROCESS	32	-0.669823	-1.51843	0.0214258	1	1	83	tags=44%, list=5%, signal=42%	Q14457/P06748/Q9Y6G9/Q13838/P01344/P60953/P05067/P35241/Q9P258/Q7LG56/Q8N7H5/O60216/Q04637/P43487
M43011	GOBP_POSITIVE_REGULATION_OF_MITOTIC_CELL_CYCLE_PHASE_TRANSITION	12	-0.78211	-1.48521	0.0214535	1	1	273	tags=42%, list=16%, signal=35%	P05067/P35241/Q9P258/Q7LG56/Q04637
M1318	GROSS_HYPOXIA_VIA_ELK3_AND_HIF1A_DN	24	-0.698666	-1.50168	0.0217866	1	1	239	tags=33%, list=14%, signal=29%	P52292/P12644/O00468/Q9P258/Q9HB71/Q5ZPR3/P46531/P54727
M10812	GOBP_CELLULAR_RESPONSE_TO_BIOTIC_STIMULUS	28	-0.674213	-1.49593	0.0218583	1	1	84	tags=14%, list=5%, signal=14%	Q04206/Q8N7H5/P22004/P46531
M12388	GOBP_PROTEIN_TARGETING_TO_MEMBRANE	17	-0.754389	-1.50921	0.0219657	1	1	95	tags=18%, list=5%, signal=17%	Q9NT62/Q9UHB9/Q9H9H4
M29307	GOBP_BIOMINERALIZATION	21	-0.714413	-1.49624	0.0220861	1	1	58	tags=38%, list=3%, signal=37%	P17302/P12644/O00622/P28300/P05452/P22004/P46531/Q99983
M16368	GOBP_MUCOPOLYSACCHARIDE_METABOLIC_PROCESS	15	0.609751	1.53055	0.0222601	1	1	228	tags=33%, list=13%, signal=29%	Q14624/O95782/Q16394/P01137/P21810
M16362	GOBP_PROTEIN_CATABOLIC_PROCESS	183	-0.504481	-1.31076	0.0225142	1	1	135	tags=11%, list=8%, signal=12%	O94874/Q06323/Q15370/P37840/P35052/O00462/Q13501/Q9UHD9/Q04206/P09936/O15294/Q96D15/Q13596/Q16740/P46531/Q14694/Q9H9H4/Q93009/Q8N668/P54727/P01034
M42507	GLASS_IGF2BP1_CLIP_TARGETS_KNOCKDOWN_DN	25	-0.694822	-1.50836	0.0234735	1	1	44	tags=20%, list=3%, signal=20%	Q9Y696/O60684/Q15185/Q6PIU2/Q9H9H4
M12775	GOBP_ERBB_SIGNALING_PATHWAY	19	0.582947	1.55833	0.0243246	1	1	209	tags=42%, list=12%, signal=37%	P01833/O75146/Q99538/Q9H7P6/P19174/Q99816/P01137/Q9NQC3
M6122	BROWNE_HCMV_INFECTION_20HR_UP	24	-0.693643	-1.49088	0.0245344	1	1	161	tags=33%, list=9%, signal=31%	P02458/O75882/P23467/Q04206/P36915/O60684/O43286/Q92925
M10954	GOBP_NEGATIVE_REGULATION_OF_RESPONSE_TO_DNA_DAMAGE_STIMULUS	10	0.698403	1.59158	0.0248651	1	1	86	tags=30%, list=5%, signal=29%	Q96K76/Q96FW1/P52926
M918	REACTOME_N_GLYCAN_TRIMMING_IN_THE_ER_AND_CALNEXIN_CALRETICULIN_CYCLE	10	-0.807965	-1.50084	0.025447	1	1	6	tags=20%, list=0%, signal=20%	P14314/P54727
M1757	SANSOM_APC_TARGETS_REQUIRE_MYC	22	-0.705282	-1.48495	0.0261384	1	1	169	tags=23%, list=10%, signal=21%	Q9P258/P15531/P27708/Q6PIU2/Q9P0K7
M12988	GOBP_MONOSACCHARIDE_BIOSYNTHETIC_PROCESS	16	-0.74107	-1.46311	0.0264418	1	1	112	tags=31%, list=6%, signal=30%	P00558/Q15493/Q00796/O15294/Q93009
M4391	PEREZ_TP53_TARGETS	67	-0.572095	-1.4	0.0273523	1	1	208	tags=22%, list=12%, signal=20%	P02458/Q96CG8/P39060/Q6PCB0/P28799/Q53FA7/O00462/P52943/Q5T5P2/Q96CN7/O14976/Q8N142/Q8N1I0/Q86V48/P01034
M42790	GOBP_PROTEASOME_MEDIATED_UBIQUITIN_DEPENDENT_PROTEIN_CATABOLIC_PROCESS	63	-0.58594	-1.42528	0.0276855	1	1	135	tags=13%, list=8%, signal=12%	O94874/Q15370/Q9UHD9/P09936/O15294/Q93009/Q8N668/P54727
M13068	GOBP_ACTIN_FILAMENT_ORGANIZATION	96	0.341895	1.34253	0.0278242	1	1	165	tags=18%, list=10%, signal=17%	O60879/Q6NY19/O75146/Q9ULV4/Q14019/P84095/Q9BR76/Q92747/P78423/O15020/Q9UEY8/P62328/P60903/Q9UM54/P63000/Q07157/P02787
M2480	ACEVEDO_NORMAL_TISSUE_ADJACENT_TO_LIVER_TUMOR_UP	37	-0.651934	-1.50764	0.0281106	1	1	66	tags=16%, list=4%, signal=16%	P02748/Q9NVA2/Q9UJW0/O14976/Q15185/P01889
M16281	GOBP_POSITIVE_REGULATION_OF_CELL_CYCLE_PHASE_TRANSITION	15	-0.747316	-1.46157	0.0282722	1	1	273	tags=53%, list=16%, signal=45%	P06748/Q13838/P05067/P35241/Q9P258/Q7LG56/Q8N7H5/Q04637
M18229	GOBP_DNA_REPAIR	56	-0.598983	-1.45941	0.0298673	1	1	83	tags=16%, list=5%, signal=16%	O94874/Q7LG56/O96019/O60216/Q14694/P15927/Q93009/Q8N668/P54727
M27771	REACTOME_RAB_GERANYLGERANYLATION	18	0.602495	1.60378	0.0300733	1	1	133	tags=17%, list=8%, signal=16%	P51151/Q92696/Q15286
M2895	MARKEY_RB1_CHRONIC_LOF_UP	19	0.563054	1.50515	0.032326	1	1	93	tags=21%, list=5%, signal=20%	Q6NY19/P43246/P55058/P29590
M11239	GOBP_NEGATIVE_REGULATION_OF_CELL_CELL_ADHESION	24	-0.682921	-1.46783	0.0326371	1	1	42	tags=25%, list=2%, signal=25%	P35241/P12644/P31431/P22004/P46531/Q9GZX9
M14199	GOBP_OSSIFICATION	78	-0.557138	-1.38297	0.0330843	1	1	279	tags=27%, list=16%, signal=24%	P49746/P27361/P17302/P06576/P17844/P12644/O00622/O60506/P28300/P13497/P02458/Q96CG8/O94874/Q9Y240/P38159/P63173/P05452/P22004/P46531/Q9GZX9/Q99983
M22135	GOBP_NEGATIVE_REGULATION_OF_TRANSCRIPTION_BY_RNA_POLYMERASE_II	64	-0.578186	-1.4083	0.0332226	1	1	242	tags=23%, list=14%, signal=21%	P17844/P12644/Q13263/P67809/P42224/P40763/P51858/P37840/P45973/Q13501/Q04206/Q8N7H5/P22004/P46531/Q13185
M16992	ZHANG_PROLIFERATING_VS_QUIESCENT	25	-0.68597	-1.48914	0.0335484	1	1	180	tags=32%, list=10%, signal=29%	P49006/P19022/Q03405/P05106/P63167/P23229/Q04206/P54727
M3592	GOLDRATH_HOMEOSTATIC_PROLIFERATION	31	-0.65886	-1.48641	0.034398	1	1	273	tags=35%, list=16%, signal=30%	P05067/P99999/P45880/P62304/Q96AE4/P15531/Q9HB71/P51858/Q9UHD9/Q15185/P54727
M13458	GOBP_INTRINSIC_APOPTOTIC_SIGNALING_PATHWAY_IN_RESPONSE_TO_DNA_DAMAGE	15	0.588419	1.47701	0.034798	1	1	93	tags=20%, list=5%, signal=19%	Q96K76/Q71UM5/P29590
M14743	GOBP_POSITIVE_REGULATION_OF_PRODUCTION_OF_MOLECULAR_MEDIATOR_OF_IMMUNE_RESPONSE	16	0.590383	1.51687	0.0350196	1	1	85	tags=19%, list=5%, signal=18%	Q9NZH0/P43246/P02786
M7061	CROMER_METASTASIS_UP	16	0.589971	1.51581	0.0350196	1	1	122	tags=25%, list=7%, signal=23%	P09874/Q15417/P19174/O43684
M15332	GOBP_PROTEASOMAL_PROTEIN_CATABOLIC_PROCESS	90	-0.545489	-1.36913	0.0351064	1	1	135	tags=11%, list=8%, signal=11%	O94874/Q06323/Q15370/Q9UHD9/P09936/O15294/Q96D15/Q93009/Q8N668/P54727
M4270	KAYO_CALORIE_RESTRICTION_MUSCLE_DN	24	-0.677553	-1.4563	0.035248	1	1	267	tags=38%, list=15%, signal=32%	P06576/P45880/P12814/P02458/P13073/P63172/P22004/Q8N668/P43487
M2179	FIGUEROA_AML_METHYLATION_CLUSTER_7_UP	12	0.639021	1.53131	0.0359843	1	1	62	tags=25%, list=4%, signal=24%	Q14533/O60462/Q86SQ4
M12621	LI_WILMS_TUMOR_VS_FETAL_KIDNEY_1_UP	48	0.419805	1.40411	0.0363178	1	1	169	tags=25%, list=10%, signal=23%	Q9NZH0/Q15746/Q15172/P20810/P55809/Q9NZV1/P78423/P09525/P60903/Q08257/Q02763/P36955
M11563	KAUFFMANN_DNA_REPAIR_GENES	27	-0.665619	-1.4591	0.0372272	1	1	132	tags=22%, list=8%, signal=21%	Q53FA7/Q7LG56/O95347/O60216/P15927/P54727
M11047	GOBP_ANTIGEN_RECEPTOR_MEDIATED_SIGNALING_PATHWAY	19	-0.707317	-1.45279	0.0373961	1	1	84	tags=21%, list=5%, signal=20%	Q04206/Q9UI10/Q13144/Q5ZPR3
M13926	GOBP_T_CELL_RECEPTOR_SIGNALING_PATHWAY	19	-0.707317	-1.45279	0.0373961	1	1	84	tags=21%, list=5%, signal=20%	Q04206/Q9UI10/Q13144/Q5ZPR3
M16923	GOBP_REGULATION_OF_OSSIFICATION	19	-0.706077	-1.45024	0.0387812	1	1	42	tags=37%, list=2%, signal=36%	P27361/P17302/P12644/O00622/P22004/P46531/Q99983
M13449	CAIRO_HEPATOBLASTOMA_DN	31	0.48743	1.45307	0.0409833	1	1	104	tags=23%, list=6%, signal=22%	Q14624/P35573/Q16394/Q04756/P35858/Q9NPH3/P55263
M7927	REACTOME_NUCLEOTIDE_EXCISION_REPAIR	27	-0.658023	-1.44245	0.0410783	1	1	78	tags=19%, list=5%, signal=18%	P19388/O96019/P15927/Q93009/P54727
M14377	GOBP_TUBE_FORMATION	19	-0.702174	-1.44222	0.0415512	1	1	235	tags=32%, list=14%, signal=28%	Q13308/P12644/Q96CG8/P31431/P46531/Q86V48
M10219	DAVIES_MULTIPLE_MYELOMA_VS_MGUS_DN	11	0.679546	1.57494	0.0419683	1	1	130	tags=36%, list=8%, signal=34%	O95498/P05109/Q14847/P62328
M27640	REACTOME_KERATINIZATION	29	0.496439	1.46467	0.0422806	1	1	501	tags=59%, list=29%, signal=42%	Q14533/P04259/P08779/Q6KB66/Q8N1N4/Q04695/P31944/P02538/Q08554/Q7Z794/P15924/P07384/P35908/P04632/P35527/P01040/P13645
M27649	REACTOME_FORMATION_OF_THE_CORNIFIED_ENVELOPE	29	0.496439	1.46467	0.0422806	1	1	501	tags=59%, list=29%, signal=42%	Q14533/P04259/P08779/Q6KB66/Q8N1N4/Q04695/P31944/P02538/Q08554/Q7Z794/P15924/P07384/P35908/P04632/P35527/P01040/P13645
M14816	GOBP_EXTRACELLULAR_MATRIX_DISASSEMBLY	17	-0.717546	-1.4355	0.0425532	1	1	47	tags=29%, list=3%, signal=29%	O14672/P08253/P11047/O75173/P01034
M16122	GOBP_MUSCLE_CELL_DEVELOPMENT	28	-0.658787	-1.4617	0.0429836	1	1	257	tags=32%, list=15%, signal=28%	Q9NZR1/O75923/P12644/P12814/P28300/Q9NZM1/P09936/P46531/O95967
M42686	GOBP_HISTONE_MODIFICATION	52	-0.58717	-1.42143	0.0433333	1	1	135	tags=17%, list=8%, signal=16%	O94874/Q9UIG0/P37840/O96019/Q13610/O15294/Q8TDI0/Q8N7H5/Q93009
M1275	SHETH_LIVER_CANCER_VS_TXNIP_LOSS_PAM2	29	-0.6629	-1.47571	0.0437114	1	1	273	tags=28%, list=16%, signal=24%	P05067/Q8NBJ4/P07355/O95497/P63167/Q9Y5Y7/Q5ZPR3/O14907
M13608	ZHAN_V1_LATE_DIFFERENTIATION_GENES_UP	14	-0.743689	-1.4317	0.0447761	1	1	99	tags=21%, list=6%, signal=20%	P23229/P63172/P01034
M13870	GOBP_GLUCOSE_METABOLIC_PROCESS	27	-0.653389	-1.43229	0.0449294	1	1	375	tags=41%, list=22%, signal=32%	P10253/P00558/P01344/P08237/Q15493/P05090/P62136/Q00796/O15294/P62140/Q93009
M7140	ZHOU_INFLAMMATORY_RESPONSE_FIMA_UP	40	-0.611498	-1.42482	0.045292	1	1	216	tags=20%, list=12%, signal=18%	Q12805/Q9H4M9/P31431/Q03405/Q04206/Q96D15/O43286/Q8IUD2
M1345	RHODES_CANCER_META_SIGNATURE	31	-0.645356	-1.45595	0.0454545	1	1	250	tags=32%, list=14%, signal=28%	P26639/Q9UL46/P62304/P52292/Q13630/Q12905/P15531/P52943/O15294/Q13185
M14134	TURASHVILI_BREAST_DUCTAL_CARCINOMA_VS_DUCTAL_NORMAL_DN	28	0.505254	1.46251	0.0457332	1	1	293	tags=39%, list=17%, signal=33%	P01833/Q15746/P47895/P78423/P26022/P02787/P04259/P08779/P00450/Q04695/O95969
M1519	KEGG_ENDOCYTOSIS	42	-0.603605	-1.41615	0.0458824	1	1	30	tags=12%, list=2%, signal=12%	Q9H4M9/P01889/Q9H9H4/Q9Y371/Q9NP79
M10054	GOBP_POSITIVE_REGULATION_OF_EPITHELIAL_CELL_DIFFERENTIATION	10	-0.786993	-1.46189	0.0465839	1	1	42	tags=30%, list=2%, signal=29%	P12644/P22004/P46531
M12739	GOBP_REGULATION_OF_NEURON_DIFFERENTIATION	20	-0.692024	-1.43233	0.0470263	1	1	89	tags=35%, list=5%, signal=34%	P05067/P12644/Q92823/Q8N2Q7/P22004/P46531/Q04637
M695	REACTOME_GLYCOSAMINOGLYCAN_METABOLISM	26	-0.652519	-1.42513	0.0473752	1	1	172	tags=23%, list=10%, signal=21%	O00468/P31431/P35052/Q9Y5Y7/O43286/Q99983
M2074	WHITFIELD_CELL_CYCLE_G1_S	11	0.669795	1.55234	0.0476391	1	1	125	tags=36%, list=7%, signal=34%	Q9UIQ6/P43246/P33992/Q9NWB6
M29308	GOBP_REGULATION_OF_BIOMINERALIZATION	17	-0.71272	-1.42585	0.048227	1	1	42	tags=35%, list=2%, signal=35%	P17302/P12644/O00622/P22004/P46531/Q99983
M12676	FOSTER_TOLERANT_MACROPHAGE_DN	58	-0.57581	-1.40077	0.0487265	1	1	195	tags=22%, list=11%, signal=21%	Q9NVA2/P39060/O00468/P31431/Q03405/P40763/P18085/Q9UDY2/O75173/P46531/O43286/Q86V48/Q9P0K7
M4960	SMID_BREAST_CANCER_BASAL_DN	64	-0.567581	-1.38247	0.0487265	1	1	287	tags=34%, list=17%, signal=30%	P02771/Q13740/Q9NRN5/P17302/P04792/P51688/P05090/P12644/P00352/P25311/P00750/O60701/Q00796/O00214/P52943/Q9NS98/P05452/Q96EC8/Q13596/P53004/Q99983/P01034
M42745	GOBP_CELLULAR_RESPONSE_TO_STRESS	225	-0.477694	-1.24799	0.0490982	1	1	321	tags=23%, list=19%, signal=21%	P16615/Q5JXB2/P10114/Q02750/P56192/P10909/Q99873/P60953/Q92878/P52272/P27361/P05067/P04792/P55786/P29508/P05090/P17844/P12644/P47897/Q13263/Q13098/P62136/P67809/O95497/P00441/P05198/P28799/O94874/Q9UIG0/P37840/P45973/Q13501/Q9UHD9/P35916/Q6IN85/Q04206/Q7LG56/O96019/Q13144/Q96D15/P36915/O60216/P46531/Q04637/Q14694/P15927/Q93009/Q9Y371/Q13185/Q8N668/P54727
M34271	GOBP_CELLULAR_OXIDANT_DETOXIFICATION	24	-0.139426	-0.299675	1	1	1	1494	tags=100%, list=86%, signal=14%	P02768/P10599/P68871/P30041/P32119/P04040/Q99497/P09211/P69905/P02649/P30048/P15559/Q9BRX8/Q9Y2Q3/Q16881/P07203/O95445/P78417/P06702/Q06830/Q92626/Q13162/P00441
M19472	HOFMANN_MYELODYSPLASTIC_SYNDROM_LOW_RISK_DN	12	-0.156437	-0.297071	1	1	1	385	tags=17%, list=22%, signal=13%	Q13885/P07355

## Sheet: 0-21% O2
ID	Description	setSize	enrichmentScore	NES	pvalue	p.adjust	qvalue	rank	leading_edge	core_enrichment
M39495	WP_CYTOPLASMIC_RIBOSOMAL_PROTEINS	75	-0.531224	-2.10764	5.82777e-07	0.00239113	0.00238939	410	tags=53%, list=24%, signal=43%	P30050/P46782/P60866/P46779/P62701/P62829/P61353/P25398/P46781/Q9Y3U8/P62841/P18124/P27635/P61927/Q02878/P83731/P23396/P18621/P18077/P62273/P84098/P62899/P62851/P62081/P62854/P62750/P61254/P42766/P62906/P15880/P62249/P49207/P36578/P83881/Q02543/P62913/P63173/P46776/P05387/P05388
M189	KEGG_RIBOSOME	77	-0.508902	-2.04192	1.82341e-06	0.00374072	0.00373798	410	tags=53%, list=24%, signal=43%	P30050/P46782/P60866/P46779/P62701/P62829/P61353/P25398/P46781/Q9Y3U8/P62841/P18124/P27635/P61927/Q02878/Q969Q0/P83731/P23396/P18621/P18077/P62273/P84098/P62899/P62851/P62081/P62854/P62750/P61254/P42766/P62906/P15880/P62249/P49207/P36578/P83881/Q02543/P62913/P63173/P46776/P05387/P05388
M4669	REACTOME_INFLUENZA_INFECTION	95	-0.463603	-1.91069	6.6773e-06	0.00771867	0.00771303	410	tags=49%, list=24%, signal=40%	P30050/P07900/P46782/P60866/P46779/P62701/P62829/P61353/P25398/P46781/Q9Y3U8/P62841/O00629/P18124/P27635/P61927/Q02878/Q969Q0/P83731/P23396/P18621/P18077/P62273/P84098/P62899/P62851/P62081/P62854/Q00610/P62750/P61254/P42766/O14980/P62906/P15880/P01137/P62249/P49207/P36578/P09496/P83881/Q02543/P62913/P63173/P46776/P05387/P05388
M27921	REACTOME_NONSENSE_MEDIATED_DECAY_NMD	85	-0.489542	-2.00521	7.5249e-06	0.00771867	0.00771303	362	tags=45%, list=21%, signal=37%	P62829/P61353/P25398/P46781/Q9Y3U8/P62841/P30153/P18124/P27635/P61927/Q02878/Q969Q0/P83731/P23396/P18621/P18077/P62273/P84098/P62899/P62851/P62081/P62854/P62750/P61254/P42766/P62906/P15880/P62249/P49207/P36578/P83881/Q02543/P62913/P63173/P46776/P05387/P05388/P67775
M27548	REACTOME_INFECTIOUS_DISEASE	276	-0.322674	-1.55814	9.9533e-06	0.00816768	0.00816171	319	tags=32%, list=18%, signal=31%	P62841/P55072/P17096/P63000/Q99873/P61160/O00629/P06748/P18124/P27635/P62805/Q14204/O14818/P62873/P28062/P51665/P01024/P61927/P62195/Q02750/Q02878/Q969Q0/P83731/P23396/P60953/Q8WUM4/P13010/P28066/O95782/Q9UI12/O00232/Q9UL46/P18621/O75531/Q99436/P18077/P62273/P84098/P62899/P62851/P25789/P62081/P30419/P62854/Q00610/P62750/P61254/P42766/O14980/P28065/P62906/Q13200/Q13409/O00487/O15144/P15880/P01137/…
M4242	RIZKI_TUMOR_INVASIVENESS_2D_UP	13	0.839773	1.99145	1.77485e-05	0.0114595	0.0114511	75	tags=31%, list=4%, signal=30%	P01344/P01266/P27708/O96019
M567	REACTOME_SRP_DEPENDENT_COTRANSLATIONAL_PROTEIN_TARGETING_TO_MEMBRANE	85	-0.47357	-1.93979	1.95506e-05	0.0114595	0.0114511	362	tags=45%, list=21%, signal=37%	P62829/P61353/P25398/P46781/Q9Y3U8/P62841/P18124/P27635/P61927/Q02878/Q969Q0/P83731/P23396/P18621/P18077/P62273/P84098/P62899/P62851/P62081/P62854/P62750/P61254/P42766/P62906/P15880/P62249/P49207/P36578/Q9UHB9/P83881/Q02543/P62913/P63173/P46776/P05387/P05388/Q15005
M41836	REACTOME_CELLULAR_RESPONSE_TO_STARVATION	93	-0.436978	-1.79239	4.09375e-05	0.0209958	0.0209805	362	tags=42%, list=21%, signal=35%	P62829/P61353/P25398/P46781/Q9Y3U8/P62841/P18124/P27635/P61927/Q02878/Q969Q0/P83731/P23396/Q9UI12/P18621/P18077/P62273/P84098/P62899/P62851/P62081/P62854/P62750/P61254/P42766/P62906/P61421/P15880/P62249/P49207/P36578/P83881/Q02543/P62913/P63173/P46776/Q16864/P05387/P05388
M27876	REACTOME_REGULATION_OF_EXPRESSION_OF_SLITS_AND_ROBOS	126	-0.398249	-1.73149	4.73286e-05	0.0210977	0.0210823	296	tags=36%, list=17%, signal=32%	P18124/P27635/O14818/P28062/P51665/P61927/P62195/Q02878/Q969Q0/P83731/P23396/P28066/O00232/Q9UL46/P18621/Q99436/P18077/P62273/P84098/P62899/P62851/P25789/P62081/P62854/P62750/P61254/P42766/P28065/P62906/Q13200/O00487/P15880/P62249/P49207/P36578/P83881/Q02543/P62913/O75832/P63173/P48556/P46776/P61289/P05387/P05388
M29556	REACTOME_EUKARYOTIC_TRANSLATION_ELONGATION	83	-0.454329	-1.86573	5.14203e-05	0.0210977	0.0210823	410	tags=49%, list=24%, signal=40%	P30050/P46782/P60866/P46779/P62701/P62829/P61353/P25398/P46781/Q9Y3U8/P62841/P18124/P27635/P61927/Q02878/Q969Q0/P83731/P23396/P18621/P18077/P62273/P84098/P62899/P62851/P62081/P62854/P62750/P61254/P42766/P62906/P15880/P62249/P49207/P36578/P83881/Q02543/P62913/P63173/P46776/P05387/P05388
M27170	REACTOME_SELENOAMINO_ACID_METABOLISM	97	-0.423591	-1.74454	7.2299e-05	0.0269675	0.0269478	402	tags=47%, list=23%, signal=39%	P30050/P46782/P60866/P46779/P62701/P41252/P23526/P62829/P61353/P25398/O95340/P46781/Q9Y3U8/P14868/P62841/P18124/P27635/P61927/Q02878/Q969Q0/P83731/P23396/P18621/P18077/P62273/P84098/P62899/P62851/P62081/P62854/P62750/P61254/P42766/P62906/P15880/P62249/P49207/P36578/P83881/Q02543/P62913/P63173/P46776/P05387/P05388/Q12904
M27685	REACTOME_RRNA_PROCESSING	90	-0.434208	-1.81323	9.3212e-05	0.0318707	0.0318474	362	tags=47%, list=21%, signal=39%	P30050/P46782/P60866/P46779/P62701/P62829/P61353/P25398/P46781/Q9Y3U8/P62841/P18124/P27635/P61927/Q02878/Q969Q0/P83731/P23396/O60832/P18621/P18077/P62273/P84098/P62899/P62851/P62081/P62854/P62750/P61254/P42766/P62906/P15880/P62249/P49207/P36578/P83881/Q02543/P62913/P63173/P46776/P05387/P05388
M29813	REACTOME_RESPONSE_OF_EIF2AK4_GCN2_TO_AMINO_ACID_DEFICIENCY	81	-0.440818	-1.79099	0.000153931	0.0485829	0.0485473	362	tags=51%, list=21%, signal=42%	P30050/P46782/P60866/P46779/P62701/P62829/P61353/P25398/P46781/Q9Y3U8/P62841/P18124/P27635/P61927/Q02878/Q969Q0/P83731/P23396/P18621/P18077/P62273/P84098/P62899/P62851/P62081/P62854/P62750/P61254/P42766/P62906/P15880/P62249/P49207/P36578/P83881/Q02543/P62913/P63173/P46776/P05387/P05388
M2780	REACTOME_SIGNALING_BY_ROBO_RECEPTORS	137	-0.343327	-1.51199	0.000615414	0.18036	0.180228	296	tags=34%, list=17%, signal=30%	P18124/P27635/O14818/P28062/P51665/P61927/P62195/Q02878/Q969Q0/P83731/P23396/P60953/P28066/O00232/Q9UL46/P18621/Q99436/P18077/P62273/P84098/P62899/P62851/P25789/P62081/P62854/P62750/P61254/P42766/P28065/P62906/Q13200/O00487/P15880/P62249/P49207/P36578/P83881/Q02543/P62913/O75832/P63173/P48556/P46776/P61289/P05387/P05388
M11151	GOBP_POSITIVE_REGULATION_OF_MAPK_CASCADE	55	0.548068	1.70493	0.000732326	0.200316	0.200169	290	tags=35%, list=17%, signal=30%	P01344/P49407/Q13443/Q02952/P20827/P08697/P35232/P35916/Q969H8/P18031/P27361/P02679/O14786/P35968/P11362/P02675/O60271/P04899/P19022
M11197	HSIAO_HOUSEKEEPING_GENES	237	-0.288714	-1.32952	0.000919845	0.235883	0.23571	300	tags=29%, list=17%, signal=27%	P06748/P50991/P18124/P08236/P84243/Q99471/P78417/P62873/P51665/P07355/Q07021/Q02878/Q969Q0/P83731/P23396/P45880/Q01628/Q06830/P18621/P50395/P18077/P62273/Q16531/P84098/P62899/P62851/Q15041/P62081/Q7L5N1/P62854/Q00610/P62750/P42766/O14980/P0C0S5/P62906/Q13200/P60033/P27348/O15144/P15880/P62249/P63244/P62316/P49207/P36578/P30041/P09496/P83881/P63167/Q02543/Q5JWF2/P67870/P18085/P62913/P04632/P25705/…
M727	REACTOME_METABOLISM_OF_AMINO_ACIDS_AND_DERIVATIVES	162	-0.319806	-1.42881	0.00133755	0.306213	0.305989	296	tags=41%, list=17%, signal=38%	P30050/P28072/P54687/P46782/P60866/P46779/P60900/P62701/P41252/Q99460/P23526/P62829/P61353/P25398/O95340/P46781/Q9Y3U8/P14868/P62841/P18124/P27635/O14818/P28062/P51665/P61927/P62195/Q02878/Q969Q0/P83731/P23396/P28066/Q9NRX5/O00232/Q9UL46/P18621/Q99436/P18077/P62273/P84098/P62899/P62851/P25789/P62081/P62854/P62750/P61254/P42766/P28065/P15559/P62906/Q13200/O00487/P15880/P62249/P49207/P36578/P83881/…
M17163	CAIRO_LIVER_DEVELOPMENT_UP	30	0.605195	1.71197	0.00134337	0.306213	0.305989	600	tags=67%, list=35%, signal=44%	Q99426/P05997/O00469/P15374/P11362/Q9ULC0/Q16629/P21741/Q15293/P80723/P61812/P49006/P55011/P48681/P17302/P50454/Q5KU26/P14618/Q9NQP4/P52926
M1351	SCHAEFFER_PROSTATE_DEVELOPMENT_48HR_DN	37	0.579639	1.69336	0.00149247	0.311284	0.311056	355	tags=43%, list=21%, signal=35%	P61626/P36955/P01040/Q96CN7/Q8IUD2/P41091/O43854/P55809/P09972/O43252/Q9Y678/P43251/Q9NT22/Q6XQN6/P0DMV9/O15460
M17238	GOBP_REGULATION_OF_TRANSLATIONAL_INITIATION	22	0.64582	1.71077	0.00151735	0.311284	0.311056	299	tags=41%, list=17%, signal=34%	P62136/Q04637/Q07666/Q15056/P05198/Q92499/Q13144/P49770/P40429
M11828	GOBP_PROTEIN_LOCALIZATION_TO_LYSOSOME	14	-0.687383	-1.85821	0.00185582	0.362592	0.362327	170	tags=36%, list=10%, signal=32%	Q9NUN5/P60033/Q9UK23/O14964/O00203
M27099	REACTOME_TCF_DEPENDENT_SIGNALING_IN_RESPONSE_TO_WNT	65	-0.418441	-1.63135	0.00255719	0.448276	0.447948	288	tags=37%, list=17%, signal=32%	P84243/P62805/O14818/P28062/P51665/P62195/P28066/O00232/Q9UL46/P19784/Q99436/P25789/O14980/P0C0S5/P28065/Q13200/O00487/P67870/O75832/P48556/Q16777/P61289/P16104/P67775
M1676	SHEN_SMARCA2_TARGETS_DN	11	0.748863	1.69278	0.00260404	0.448276	0.447948	250	tags=64%, list=14%, signal=55%	P01266/P02787/Q00266/O60610/Q10570/P02675/O75144
M16031	GOBP_RIBOSOMAL_LARGE_SUBUNIT_BIOGENESIS	22	-0.574735	-1.78219	0.00262214	0.448276	0.447948	300	tags=59%, list=17%, signal=49%	P06748/P18124/P27635/Q02878/P83731/P18077/P62750/P61254/P42766/P62906/P62913/P63173/P05388
M10380	GOBP_ANTIMICROBIAL_HUMORAL_RESPONSE	13	0.730811	1.73305	0.00276346	0.453538	0.453207	276	tags=46%, list=16%, signal=39%	P02787/P61626/P02788/P00734/P02675/P02538
M27285	REACTOME_REGULATION_OF_INSULIN_LIKE_GROWTH_FACTOR_IGF_TRANSPORT_AND_UPTAKE_BY_INSULIN_LIKE_GROWTH_FACTOR_BINDING_PROTEINS_IGFBPS	57	0.505082	1.57698	0.00301819	0.474057	0.47371	575	tags=54%, list=33%, signal=38%	P01344/P01009/Q6PCB0/P02787/P05546/O14672/P00734/Q07065/P02679/P09382/O95084/Q02818/P01034/O00391/P35858/P19022/Q15084/Q9H8M9/Q12841/Q15293/P02771/Q16270/P11047/P02647/Q8NBJ4/Q06481/P09603/P14314/P19823/P02768/P12259
M12299	SEMENZA_HIF1_TARGETS	18	0.658009	1.66979	0.00311955	0.474057	0.47371	357	tags=44%, list=21%, signal=36%	P01344/P19367/P02787/P09972/P05121/P00558/O15460/P06733
M2577	NUTT_GBM_VS_AO_GLIOMA_DN	19	-0.626583	-1.88207	0.0032492	0.476124	0.475776	251	tags=42%, list=15%, signal=36%	Q969Q0/P83731/P45880/Q9UKU9/P62750/P36578/P46776/P05387
M26956	REACTOME_REPRODUCTION	19	-0.616455	-1.85165	0.00398893	0.564364	0.563952	50	tags=32%, list=3%, signal=31%	P84243/P62805/P0C0S5/Q16777/P16104/P21926
M2234	BHAT_ESR1_TARGETS_VIA_AKT1_UP	27	0.598533	1.65493	0.00413382	0.565369	0.564955	242	tags=37%, list=14%, signal=32%	O00592/Q9NRN5/Q9UHD8/Q9Y265/P13646/P05198/Q6ZRP7/Q99575/Q9UQ80/Q8WTV0
M27656	REACTOME_COOPERATION_OF_PDCL_PHLP1_AND_TRIC_CCT_IN_G_PROTEIN_BETA_FOLDING	16	-0.64809	-1.84442	0.0045241	0.580899	0.580474	341	tags=62%, list=20%, signal=51%	P50990/P17987/P78371/P50991/P50148/P62873/P49368/P19784/P62879/P67870
M11348	GOBP_RIBOSOME_ASSEMBLY	24	-0.560777	-1.76827	0.00453053	0.580899	0.580474	319	tags=46%, list=18%, signal=38%	P62841/P06748/P27635/Q07021/Q02878/P83731/P13010/P62750/P62913/P63173/P05388
M12016	OUELLET_OVARIAN_CANCER_INVASIVE_VS_LMP_UP	50	-0.449969	-1.67882	0.00470723	0.585266	0.584838	169	tags=22%, list=10%, signal=20%	Q08722/P0C0S5/P30408/Q5JWF2/P67870/P18085/Q92905/P35221/P54709/Q15005/P21926
M10814	BECKER_TAMOXIFEN_RESISTANCE_UP	13	-0.701058	-1.85806	0.00501074	0.604679	0.604237	228	tags=46%, list=13%, signal=40%	Q01628/P30419/P07099/Q9UNN8/Q13596/Q01995
M39323	WP_B_CELL_RECEPTOR_SIGNALING_PATHWAY	10	-0.742546	-1.86449	0.00545641	0.636278	0.635812	312	tags=70%, list=18%, signal=58%	P36507/P63000/Q02750/P60953/P60033/P28482/P19174
M2246	BRUINS_UVC_RESPONSE_VIA_TP53_GROUP_D	29	0.584015	1.64931	0.00558274	0.636278	0.635812	336	tags=34%, list=19%, signal=28%	Q9H4L5/P01009/P19367/P35908/Q9BZP6/O00429/P62140/O43175/O60568/P21796
M7847	REACTOME_SIGNALING_BY_WNT	84	-0.358714	-1.47463	0.00584856	0.643587	0.643117	288	tags=38%, list=17%, signal=33%	P63000/P30153/P84243/P62805/O14818/P62873/P28062/P51665/P62195/P28066/O95782/O00232/Q9UL46/P19784/Q99436/Q13616/P25789/Q00610/O14980/P0C0S5/P28065/Q13200/O00487/P62879/P09496/P67870/O75832/P48556/Q16777/P61289/P16104/P67775
M10214	GOBP_RIBOSOME_BIOGENESIS	62	-0.402903	-1.56744	0.00606011	0.643587	0.643117	319	tags=39%, list=18%, signal=33%	P62841/P06748/P18124/P27635/Q07021/Q02878/P83731/O60832/P13010/P61221/P18077/P62851/P62081/P62750/P61254/P42766/O14980/P62906/P62249/Q9NX58/P62913/P63173/Q14146/P05388
M2151	DUTERTRE_ESTRADIOL_RESPONSE_6HR_UP	36	0.560274	1.633	0.00621886	0.643587	0.643117	248	tags=33%, list=14%, signal=29%	Q9NRN5/Q99715/Q9UHD8/P53985/Q15758/Q96CN7/Q9Y265/P13646/O00469/P54577/Q8WTV0/O95084
M16858	OSMAN_BLADDER_CANCER_DN	90	-0.356	-1.48664	0.00646962	0.643587	0.643117	289	tags=32%, list=17%, signal=28%	P27635/P84243/P62805/P61927/P83731/P23396/P16403/O15294/P39060/P18077/P84098/P62851/P62081/P62750/P42766/P62906/P62249/P49207/Q15459/P36578/P83881/Q02543/Q5JWF2/P63173/P05387/Q15020/P05388/Q9BRX8/P67775
M13217	GOBP_SPERM_EGG_RECOGNITION	10	-0.730255	-1.83363	0.00653214	0.643587	0.643117	341	tags=70%, list=20%, signal=57%	P50990/P17987/P78371/P50991/P49368/P45880/P21926
M27665	REACTOME_DNA_REPLICATION_PRE_INITIATION	56	-0.395646	-1.50512	0.00658802	0.643587	0.643117	293	tags=38%, list=17%, signal=32%	O60684/P84243/P62805/O14818/P28062/P51665/P62195/P28066/O00232/Q9UL46/Q99436/P25789/P0C0S5/P28065/Q13200/O00487/O75832/P48556/Q16777/P61289/P16104
M11266	KEGG_LYSOSOME	56	-0.393954	-1.49869	0.00688522	0.656058	0.655578	221	tags=32%, list=13%, signal=29%	P08236/Q9NRA2/P07858/Q9UI12/P54803/P15289/Q00610/P50897/P61421/P54802/P09496/Q9UK23/P56377/O00203/Q93050/P11117/P07602/P08962
M14517	GOBP_CELLULAR_RESPONSE_TO_CALCIUM_ION	10	0.736345	1.64057	0.00703547	0.656058	0.655578	401	tags=70%, list=23%, signal=54%	O75131/Q13557/P35611/P17405/Q8N2Q7/P11021/Q92542
M7876	CHEBOTAEV_GR_TARGETS_DN	11	0.717009	1.62077	0.00731548	0.660439	0.659957	167	tags=45%, list=10%, signal=41%	Q6PCB0/Q99439/Q14019/P04746/P00750
M39768	WP_FERROPTOSIS	22	0.599279	1.58749	0.00740439	0.660439	0.659957	322	tags=36%, list=19%, signal=30%	P04156/P02787/Q15758/P02792/P02794/Q15366/P48637/O95352
M19693	DAZARD_RESPONSE_TO_UV_NHEK_UP	59	-0.396218	-1.51608	0.00757186	0.661007	0.660524	137	tags=24%, list=8%, signal=23%	P15880/P01137/P63244/P30408/P49207/P83881/P63167/P62834/P04632/P63173/P48556/Q16777/P16104/Q01995
M22575	GOBP_RIBONUCLEOSIDE_MONOPHOSPHATE_BIOSYNTHETIC_PROCESS	16	0.64572	1.60102	0.00808193	0.683529	0.683029	230	tags=38%, list=13%, signal=33%	P27708/P07741/Q8N142/P55263/P31939/Q06203
M14180	GOBP_NUCLEOSIDE_MONOPHOSPHATE_BIOSYNTHETIC_PROCESS	17	0.636452	1.59121	0.00826498	0.683529	0.683029	230	tags=35%, list=13%, signal=31%	P27708/P07741/Q8N142/P55263/P31939/Q06203
M186	PID_PDGFRB_PATHWAY	43	-0.441113	-1.60617	0.00855305	0.683529	0.683029	146	tags=23%, list=8%, signal=22%	P27348/O15144/P08631/Q8N1I0/P62834/P28482/P19174/O15145/Q01995/P67775
M18762	COULOUARN_TEMPORAL_TGFB1_SIGNATURE_UP	15	0.659638	1.6155	0.00874805	0.683529	0.683029	478	tags=67%, list=28%, signal=49%	P62328/P00750/O14786/Q9UPT5/P05121/P23229/O75976/P02771/P08670/Q9NR12
M39823	WP_HIPPOMERLIN_SIGNALING_DYSREGULATION	29	0.567848	1.60365	0.00882735	0.683529	0.683029	346	tags=45%, list=20%, signal=36%	P62136/P10644/P35916/P36873/P13861/P62140/P35968/P11362/P29317/P55290/P19022/P23229/P33151
M13598	GOBP_RECEPTOR_INTERNALIZATION	22	-0.528995	-1.64036	0.00891593	0.683529	0.683029	170	tags=45%, list=10%, signal=42%	P02786/P07355/P37840/Q9NUN5/Q00610/P22303/P60033/Q13596/P08962/P21926
M10607	GOBP_INTERMEDIATE_FILAMENT_ORGANIZATION	10	0.727893	1.62174	0.00918367	0.683529	0.683029	111	tags=40%, list=6%, signal=38%	P17661/P08779/P35908/P13646
M14811	LEE_LIVER_CANCER_ACOX1_DN	10	0.727461	1.62077	0.00929108	0.683529	0.683029	37	tags=30%, list=2%, signal=30%	Q15493/P01009/P19827
M18155	KEGG_INSULIN_SIGNALING_PATHWAY	26	0.585102	1.6043	0.00932918	0.683529	0.683029	259	tags=42%, list=15%, signal=37%	P62136/Q9NZT1/P19367/P10644/P36873/P18031/P13861/P27361/P62140/P10586/Q9UPT5
M13283	HSIAO_LIVER_SPECIFIC_GENES	70	0.455662	1.47354	0.0102167	0.714507	0.713984	483	tags=43%, list=28%, signal=32%	Q15493/P01009/Q04756/P02787/P19827/P36955/Q93088/P08697/P05546/O00469/P00734/P02656/P04004/P02679/P40261/P02675/P05121/P05166/P19022/P17516/P25311/P16930/P00441/Q14914/P43490/P02647/Q13162/P00966/Q06033/P03952
M2245	BRUINS_UVC_RESPONSE_VIA_TP53_GROUP_C	11	0.706373	1.59673	0.0104125	0.714507	0.713984	172	tags=36%, list=10%, signal=33%	P17661/P61626/P31431/Q8N1N4
M27888	REACTOME_ESTROGEN_DEPENDENT_GENE_EXPRESSION	22	-0.519386	-1.61056	0.01044	0.714507	0.713984	344	tags=59%, list=20%, signal=48%	P68431/Q86X55/Q14683/P07900/P07339/Q13547/Q99873/P84243/P62805/P0C0S5/Q15185/Q16777/P16104
M16677	GOBP_ERK1_AND_ERK2_CASCADE	48	0.488255	1.49489	0.0104485	0.714507	0.713984	229	tags=29%, list=13%, signal=26%	P02787/P49407/Q02952/P10301/P08697/P35232/P35916/P18031/P27361/P02679/O14786/P35968/P02675/P29317
M2185	PANGAS_TUMOR_SUPPRESSION_BY_SMAD1_AND_SMAD5_UP	27	0.568031	1.57059	0.0106445	0.715972	0.715448	183	tags=30%, list=11%, signal=27%	P55058/Q99715/P61626/Q14699/P35268/P18031/P62328/P06396
M12676	FOSTER_TOLERANT_MACROPHAGE_DN	58	0.466889	1.46828	0.010958	0.724497	0.723967	512	tags=48%, list=30%, signal=35%	Q07666/P31431/Q9Y5X9/P53985/O43286/P23246/P84103/O00469/Q13557/O75144/O75173/P05121/O43172/Q9NX76/P17813/P0DMV9/Q9BUF5/Q03405/Q15417/Q15293/P40763/Q86SQ4/Q32MZ4/P43490/P17302/Q13451/P53634/P09603
M17093	GOBP_MEIOTIC_CELL_CYCLE	20	-0.575737	-1.76327	0.0111244	0.724497	0.723967	25	tags=30%, list=1%, signal=30%	O95347/Q02880/P30153/P61160/P16104/P67775
M14566	PEREZ_TP53_AND_TP63_TARGETS	10	0.722502	1.60973	0.011334	0.726615	0.726084	44	tags=20%, list=3%, signal=20%	P01344/P49407
M29131	GOBP_KERATINOCYTE_DIFFERENTIATION	29	0.559721	1.5807	0.0116042	0.732494	0.731959	376	tags=38%, list=22%, signal=30%	P20930/P08779/Q13443/P01040/P35908/P29317/P13645/Q86YZ3/P22392/O95361/P15924
M12522	CREIGHTON_ENDOCRINE_THERAPY_RESISTANCE_1	85	0.433	1.44633	0.012583	0.737671	0.737132	403	tags=31%, list=23%, signal=25%	Q99715/Q99426/P27708/P26599/P01040/Q04941/P55263/Q96CN7/Q8IUD2/P09874/P05198/Q9UQ80/P31939/P40123/O43252/P09382/O95084/P47929/Q14166/P22087/Q9BUF5/Q96QD8/Q7L2H7/P15924/O14744/Q86SQ4
M12577	GOBP_RIBOSOMAL_LARGE_SUBUNIT_ASSEMBLY	10	-0.702946	-1.76506	0.012647	0.737671	0.737132	289	tags=70%, list=17%, signal=59%	P27635/Q02878/P83731/P62750/P62913/P63173/P05388
M7705	AKL_HTLV1_INFECTION_UP	14	-0.611329	-1.65261	0.0127508	0.737671	0.737132	62	tags=43%, list=4%, signal=42%	Q9BV40/P35221/P48735/P60903/P15531/Q01469
M12971	KYNG_DNA_DAMAGE_BY_GAMMA_RADIATION	14	-0.609999	-1.64902	0.0127508	0.737671	0.737132	5	tags=36%, list=0%, signal=36%	P08581/Q9Y277/P62745/P61019/P67775
M27795	REACTOME_RUNX1_REGULATES_TRANSCRIPTION_OF_GENES_INVOLVED_IN_DIFFERENTIATION_OF_HSCS	50	-0.421394	-1.57221	0.0128429	0.737671	0.737132	288	tags=40%, list=17%, signal=34%	P84243/P62805/O14818/P28062/P51665/P62195/P28066/O00232/Q9UL46/Q99436/P25789/P0C0S5/P28065/Q13200/O00487/O75832/P48556/Q16777/P61289/P16104
M11355	KEGG_TIGHT_JUNCTION	33	-0.47811	-1.62426	0.0131593	0.737671	0.737132	89	tags=27%, list=5%, signal=26%	P60953/P19784/O75508/P67870/P51153/P35221/Q9UKX2/P62070/P67775
M14072	WINTER_HYPOXIA_METAGENE	86	0.430118	1.43895	0.0134978	0.737671	0.737132	389	tags=33%, list=22%, signal=27%	P01344/Q9Y4L1/P19367/P02787/P30519/O00233/P53985/P02792/P20827/P61073/P05997/O00469/P35968/P09972/Q06203/P09382/O00391/P21589/P05121/P47895/P00558/P17813/Q03405/O15460/P06733/P00749/P11021/Q05682
M16638	GOBP_IRON_ION_HOMEOSTASIS	16	0.628408	1.5581	0.0135537	0.737671	0.737132	126	tags=31%, list=7%, signal=29%	P02787/P30519/P02788/P02792/P02794
M1017	REACTOME_DNA_REPLICATION	58	-0.396126	-1.50641	0.0135726	0.737671	0.737132	293	tags=38%, list=17%, signal=33%	O60684/P84243/P62805/O14818/P28062/P51665/P62195/P28066/O00232/Q9UL46/Q99436/Q13616/P25789/P0C0S5/P28065/Q13200/O00487/O75832/P48556/Q16777/P61289/P16104
M27079	REACTOME_DEGRADATION_OF_BETA_CATENIN_BY_THE_DESTRUCTION_COMPLEX	49	-0.390333	-1.45774	0.0136701	0.737671	0.737132	281	tags=35%, list=16%, signal=30%	O14818/P28062/P51665/P62195/P28066/O00232/Q9UL46/Q99436/Q13616/P25789/P28065/Q13200/O00487/O75832/P48556/P61289/P67775
M27660	REACTOME_MITOTIC_PROPHASE	26	-0.50741	-1.63428	0.0138135	0.737671	0.737132	308	tags=38%, list=18%, signal=32%	P30153/P84243/P62805/P61019/O75531/P0C0S5/P28482/Q16777/P16104/P67775
M29829	REACTOME_DISEASES_OF_PROGRAMMED_CELL_DEATH	22	-0.507655	-1.57418	0.0139453	0.737671	0.737132	288	tags=36%, list=17%, signal=31%	P84243/P62805/Q07021/Q06830/P0C0S5/P04632/Q16777/P16104
M1758	SANSOM_WNT_PATHWAY_REQUIRE_MYC	11	0.695097	1.57124	0.0140593	0.737671	0.737132	167	tags=45%, list=10%, signal=41%	O96019/Q15758/Q9Y265/P09874/P00750
M725	REACTOME_TRANSPORT_OF_MATURE_TRANSCRIPT_TO_CYTOPLASM	12	0.69504	1.61862	0.0142033	0.737671	0.737132	246	tags=50%, list=14%, signal=43%	Q07955/P84103/Q01081/Q10570/Q13838/Q16629
M8467	JISON_SICKLE_CELL_DISEASE_UP	47	-0.428553	-1.57845	0.0147577	0.752969	0.752418	279	tags=32%, list=16%, signal=28%	P78417/P28062/P07355/P02751/Q06830/Q9UL46/Q13616/Q9BV40/P53004/P28065/P51153/P48509/Q93050/O00299/P21926
M15144	GOBP_POSITIVE_REGULATION_OF_ERK1_AND_ERK2_CASCADE	29	0.551374	1.55713	0.0148648	0.752969	0.752418	280	tags=38%, list=16%, signal=32%	P49407/Q02952/P08697/P35232/P35916/P27361/P02679/O14786/P35968/P02675/P04899
M27827	REACTOME_CELLULAR_RESPONSES_TO_STIMULI	260	-0.253904	-1.19639	0.0154075	0.7609	0.760344	289	tags=27%, list=17%, signal=26%	P27635/P84243/P62805/Q14204/O14818/P28062/P51665/P61927/P42704/P62195/Q02878/Q969Q0/P83731/P23396/P16403/P28066/Q06830/Q9UI12/O00232/Q9UL46/P18621/P19784/O60884/Q99436/Q13616/P18077/P62273/P53004/P84098/P62899/P62851/P25789/P62081/P10412/P62854/P62750/P61254/P42766/O14980/P0C0S5/P28065/P62906/Q13200/Q13409/O00487/P61421/P15880/P62249/P49207/P36578/P30041/P83881/P63167/Q15185/Q02543/P67870/P62913/…
M27658	REACTOME_ASSEMBLY_OF_THE_ORC_COMPLEX_AT_THE_ORIGIN_OF_REPLICATION	11	-0.684055	-1.76724	0.0154974	0.7609	0.760344	293	tags=55%, list=17%, signal=46%	O60684/P84243/P62805/P0C0S5/Q16777/P16104
M13722	GOBP_REGULATION_OF_GLUCOSE_METABOLIC_PROCESS	11	0.689036	1.55754	0.0157764	0.7609	0.760344	202	tags=45%, list=12%, signal=40%	P01344/Q15493/P62136/P62140/P40261
M40318	GOBP_MAPK_CASCADE	92	0.426175	1.43467	0.0158255	0.7609	0.760344	290	tags=28%, list=17%, signal=25%	P01344/P02787/P49407/Q13443/Q02952/P10301/P20827/P08697/P35232/P35916/Q969H8/P36873/P18031/P27361/P02679/O14786/P62140/P53041/Q13098/P35968/P11362/P02675/P29317/O60271/P04899/P19022
M874	REACTOME_SIGNALING_BY_INTERLEUKINS	104	-0.315432	-1.30596	0.0163515	0.7609	0.760344	281	tags=30%, list=16%, signal=27%	O14818/P78417/P28062/P51665/P07355/P02751/P62195/Q02750/Q9NPH3/P60953/P28066/O00232/Q9UL46/Q99436/Q13616/P08253/P25789/P19320/P28065/Q13200/O00487/P01137/P08631/P04083/P09661/P28482/O75832/P48556/P61289/P05388/P67775
M34064	GOBP_NUCLEOSOME_ASSEMBLY	21	-0.555263	-1.72044	0.0164619	0.7609	0.760344	350	tags=52%, list=20%, signal=42%	P07305/P16402/P06748/Q5SSJ5/P84243/P62805/O75367/P16403/P10412/Q15020/P16104
M14573	BENPORATH_NOS_TARGETS	28	0.554104	1.55306	0.0165275	0.7609	0.760344	465	tags=43%, list=27%, signal=32%	Q9NRN5/Q99715/P47755/P35968/P11362/O60271/Q8NI36/Q16666/P40763/P62269/P17302/P54289
M10123	GOBP_SINGLE_FERTILIZATION	20	-0.548544	-1.67998	0.0170815	0.7609	0.760344	346	tags=50%, list=20%, signal=40%	Q9UK55/P50990/P17987/P78371/P50991/P84243/P49368/P45880/O00203/P21926
M6753	ODONNELL_TFRC_TARGETS_UP	31	0.531828	1.51029	0.0171728	0.7609	0.760344	540	tags=48%, list=31%, signal=34%	P01009/P61626/P49407/P02794/P35916/Q9BPU6/P43251/O95361/Q05682/P00966/P62820/O95497/P06753/Q92823/O75581
M5775	BROWNE_HCMV_INFECTION_12HR_DN	11	0.685436	1.5494	0.0172789	0.7609	0.760344	270	tags=36%, list=16%, signal=31%	P01344/P84103/Q99575/P05121
M4780	WANG_SMARCE1_TARGETS_DN	68	-0.362838	-1.43783	0.0174888	0.7609	0.760344	124	tags=15%, list=7%, signal=14%	P28065/P30408/P09661/O75608/Q9BXJ9/P09936/Q12904/P05109/P62070/P21926
M1424	LEE_LIVER_CANCER_DENA_DN	10	0.706185	1.57337	0.0175945	0.7609	0.760344	104	tags=30%, list=6%, signal=28%	Q15493/Q93088/Q00266
M15335	GOBP_FERTILIZATION	23	-0.508373	-1.60252	0.0177598	0.7609	0.760344	346	tags=43%, list=20%, signal=35%	Q9UK55/P50990/P17987/P78371/P50991/P84243/P49368/P45880/O00203/P21926
M1120	JOHANSSON_GLIOMAGENESIS_BY_PDGFB_UP	23	-0.505996	-1.59503	0.0177598	0.7609	0.760344	23	tags=17%, list=1%, signal=17%	Q8IWU5/P05388/P08962/P21926
M14046	DACOSTA_UV_RESPONSE_VIA_ERCC3_COMMON_UP	17	0.599677	1.49927	0.0178497	0.7609	0.760344	370	tags=47%, list=21%, signal=37%	P16152/P20827/P41091/Q53FA7/P09543/P09497/Q00059/P68366
M15105	GOBP_NUCLEOSIDE_MONOPHOSPHATE_METABOLIC_PROCESS	22	0.565166	1.49712	0.018627	0.7609	0.760344	266	tags=32%, list=15%, signal=27%	P27708/P07741/Q8N142/P55263/P31939/Q06203/P21589
M261	PID_P53_REGULATION_PATHWAY	10	-0.682544	-1.71383	0.0186693	0.7609	0.760344	87	tags=20%, list=5%, signal=19%	P62913/P67775
M1549	LINDVALL_IMMORTALIZED_BY_TERT_UP	25	-0.502023	-1.57362	0.0186877	0.7609	0.760344	32	tags=32%, list=2%, signal=32%	P01023/O95340/P17096/P05783/Q16394/P09936/P51884/P21926
M27792	REACTOME_RUNX1_REGULATES_GENES_INVOLVED_IN_MEGAKARYOCYTE_DIFFERENTIATION_AND_PLATELET_FUNCTION	12	-0.662587	-1.73454	0.0190567	0.7609	0.760344	327	tags=58%, list=19%, signal=48%	Q13547/Q99873/P84243/P62805/P0C0S5/Q16777/P16104
M12025	GOBP_PIGMENTATION	12	-0.662441	-1.73416	0.0190567	0.7609	0.760344	176	tags=42%, list=10%, signal=38%	P48444/P63244/O75882/O00203/P08962
M2351	TORCHIA_TARGETS_OF_EWSR1_FLI1_FUSION_DN	44	0.48203	1.44665	0.0190601	0.7609	0.760344	526	tags=52%, list=30%, signal=37%	O75131/Q9BZ29/Q04941/O75051/Q99439/P00488/P55809/P13645/P09382/O43175/O00151/Q15417/Q15293/P49006/Q9Y6N5/P11234/Q14914/Q13451/P08670/Q9Y646/P53634/O95810/O00154
M6822	ONDER_CDH1_TARGETS_1_DN	35	0.526043	1.52591	0.0193441	0.7609	0.760344	182	tags=23%, list=11%, signal=21%	Q04637/Q13283/P53985/P23246/P84103/P13646/Q08211/Q99575
M997	REACTOME_ION_CHANNEL_TRANSPORT	22	-0.494777	-1.53425	0.0194515	0.7609	0.760344	239	tags=32%, list=14%, signal=28%	Q9C0H2/Q9UI12/P61421/Q93050/Q16864/P54709/P35670
M27080	REACTOME_RHO_GTPASE_EFFECTORS	92	-0.320727	-1.32691	0.0204099	0.7609	0.760344	161	tags=17%, list=9%, signal=17%	O14980/P0C0S5/Q13409/P27348/O15144/Q9H0B6/P63167/Q16513/P28482/P35221/Q92747/Q16777/O15145/P16104/P05109/P67775
M12284	GOBP_POSITIVE_REGULATION_OF_SIGNAL_TRANSDUCTION_BY_P53_CLASS_MEDIATOR	11	-0.663089	-1.71307	0.0206225	0.7609	0.760344	397	tags=64%, list=23%, signal=49%	P60866/P62829/P62841/P61927/P62081/P61254/Q8TDI0
M39406	WP_MRNA_PROCESSING	55	0.472522	1.46992	0.0207186	0.7609	0.760344	317	tags=35%, list=18%, signal=29%	P26599/Q07955/P23246/P84103/Q6P2Q9/P31943/Q08211/Q92499/Q01081/Q10570/Q15428/Q9Y333/Q15366/P14866/Q16629/P08579/P62318/O43172/Q15427
M42898	GOBP_PROTEIN_DNA_COMPLEX_ASSEMBLY	23	-0.500113	-1.57648	0.0208484	0.7609	0.760344	300	tags=61%, list=17%, signal=51%	P68431/P55209/Q86VP6/P07305/P16402/P06748/Q5SSJ5/P84243/P62805/O75367/P16403/P10412/Q15020/P16104
M39570	WP_AMINO_ACID_METABOLISM	37	0.508175	1.48459	0.0209029	0.7609	0.760344	553	tags=43%, list=32%, signal=30%	P27708/Q93088/P40926/P26640/P48637/O15460/P49419/Q99798/P09622/P16930/O75390/P36957/P00966/Q16853/P14618/P40925
M10209	SHEPARD_BMYB_MORPHOLINO_UP	46	0.484033	1.46516	0.020913	0.7609	0.760344	95	tags=17%, list=5%, signal=17%	P01344/O75131/O15160/Q7KZF4/Q12907/P35908/Q96KP4/Q8TCT9
M27694	REACTOME_RNA_POLYMERASE_II_TRANSCRIPTION_TERMINATION	14	0.646652	1.56166	0.0210877	0.7609	0.760344	288	tags=50%, list=17%, signal=42%	Q07955/P84103/Q01081/Q10570/Q13838/Q16629/P62318
M16810	GOBP_AMP_METABOLIC_PROCESS	14	0.646433	1.56114	0.0210877	0.7609	0.760344	266	tags=43%, list=15%, signal=37%	P07741/Q8N142/P55263/P31939/Q06203/P21589
M15218	GOBP_ARP2_3_COMPLEX_MEDIATED_ACTIN_NUCLEATION	15	-0.600099	-1.65827	0.0211735	0.7609	0.760344	145	tags=33%, list=8%, signal=31%	O15144/Q9BPX5/Q92747/Q9BR76/O15145
M14161	GOBP_CELLULAR_RESPONSE_TO_INORGANIC_SUBSTANCE	32	0.521422	1.47781	0.0212829	0.7609	0.760344	409	tags=50%, list=24%, signal=39%	O75131/P04156/P02787/P36955/P09874/P05198/P50570/P27361/Q13557/P35611/P17405/Q8N2Q7/P11021/P00441/Q92542/P55011
M12194	GOBP_EPIDERMAL_CELL_DIFFERENTIATION	36	0.522771	1.52369	0.0216699	0.7609	0.760344	395	tags=33%, list=23%, signal=26%	P20930/P08779/Q13443/P01040/P35908/P29317/P13645/Q86YZ3/P22392/O95361/P15924/P00441
M10973	MATTIOLI_MGUS_VS_PCL	40	0.486399	1.43933	0.0216976	0.7609	0.760344	208	tags=25%, list=12%, signal=23%	O75131/Q99426/P27708/Q13283/Q07955/Q9Y265/P51571/P09874/P55036/Q13838
M10117	VERHAAK_AML_WITH_NPM1_MUTATED_DN	40	0.486385	1.43929	0.0216976	0.7609	0.760344	466	tags=38%, list=27%, signal=28%	P36955/P02788/P09758/P06396/Q12765/P11362/P21589/P23229/Q16666/Q6NZI2/Q16270/P28827/P11047/P17302/P00966
M11591	GOBP_IRON_ION_TRANSPORT	11	0.674118	1.52382	0.0222178	0.770469	0.769905	142	tags=45%, list=8%, signal=42%	P02787/P02788/P02792/P02794/P50570
M11054	GOBP_BARBED_END_ACTIN_FILAMENT_CAPPING	10	0.692437	1.54274	0.022346	0.770469	0.769905	243	tags=40%, list=14%, signal=35%	P47755/P06396/P58546/P35611
M15483	GOBP_CELL_CELL_RECOGNITION	13	-0.621683	-1.64768	0.022592	0.772458	0.771893	341	tags=62%, list=20%, signal=50%	P50990/P17987/P78371/P50991/P49368/P45880/P60033/P21926
M15912	HAMAI_APOPTOSIS_VIA_TRAIL_DN	30	0.520381	1.47205	0.0230855	0.781796	0.781224	479	tags=57%, list=28%, signal=42%	P55058/P49407/Q15758/P20827/Q96D15/Q9HD42/Q53FA7/P09972/P10586/P51688/P19022/O95361/Q03405/P21741/P04908/P50454/P37802
M2377	IKEDA_MIR133_TARGETS_UP	10	-0.671363	-1.68575	0.0232462	0.781796	0.781224	146	tags=40%, list=8%, signal=37%	P60953/P27348/Q13596/P67775
M39662	WP_TNFALPHA_SIGNALING_PATHWAY	11	-0.651796	-1.6839	0.0242832	0.806158	0.805569	207	tags=45%, list=12%, signal=40%	Q13616/Q13200/Q16543/P28482/P67775
M16873	GOBP_MYOBLAST_FUSION	10	-0.668281	-1.67802	0.0244506	0.806158	0.805569	151	tags=20%, list=9%, signal=18%	P60033/P21926
M27686	REACTOME_EUKARYOTIC_TRANSLATION_INITIATION	101	-0.323	-1.31918	0.0248526	0.806158	0.805569	252	tags=29%, list=15%, signal=26%	Q02878/Q969Q0/P83731/P23396/P18621/P18077/P62273/P84098/O15372/P62899/P62851/P62081/P62854/P62750/P61254/P42766/P62906/P15880/P62249/P49207/P36578/P83881/Q02543/P62913/P63173/P46776/Q9UI10/P05387/P05388
M27458	REACTOME_TRANSCRIPTIONAL_REGULATION_BY_SMALL_RNAS	13	-0.614582	-1.62886	0.0249426	0.806158	0.805569	288	tags=38%, list=17%, signal=32%	P84243/P62805/P0C0S5/Q16777/P16104
M11665	PRAMOONJAGO_SOX4_TARGETS_DN	13	0.660197	1.5656	0.024953	0.806158	0.805569	245	tags=46%, list=14%, signal=40%	P30049/P26599/P09874/P11279/Q9Y333/P14866
M13087	REACTOME_PROCESSING_OF_CAPPED_INTRON_CONTAINING_PRE_MRNA	63	0.45574	1.44545	0.0252393	0.809039	0.808447	317	tags=32%, list=18%, signal=27%	P26599/Q9BUJ2/Q07955/P84103/Q6P2Q9/P31943/Q08211/P09234/Q01081/Q10570/Q15428/Q9Y333/Q13838/Q15366/P14866/Q16629/P08579/P62318/O43172/Q15427
M10664	XU_GH1_AUTOCRINE_TARGETS_UP	25	0.548661	1.49635	0.0265318	0.835789	0.835178	441	tags=56%, list=25%, signal=42%	Q9NRN5/P07741/Q13283/Q04941/P61073/P51571/Q969H8/P09382/O43175/P20933/O14950/P00441/P35613/Q14914
M156	PID_ECADHERIN_NASCENT_AJ_PATHWAY	19	-0.531662	-1.59696	0.0266658	0.835789	0.835178	241	tags=47%, list=14%, signal=41%	P35222/Q8IZP0/P63000/P60953/P19784/P67870/P62834/P35221/P15531
M18970	CHANDRAN_METASTASIS_TOP50_UP	10	0.68553	1.52735	0.0266849	0.835789	0.835178	444	tags=70%, list=26%, signal=52%	Q13283/Q15366/P11233/Q92841/P80723/P00441/P10809
M27572	REACTOME_MAPK6_MAPK4_SIGNALING	48	-0.390903	-1.44735	0.0271905	0.842348	0.841732	281	tags=40%, list=16%, signal=34%	O14818/P28062/P51665/P62195/P60953/P28066/O00232/Q9UL46/Q99436/P08253/P25789/O14980/P28065/Q13200/O00487/Q16181/O75832/P48556/P61289
M10085	GOBP_CYTOPLASMIC_TRANSLATION	98	-0.308297	-1.28106	0.0275643	0.842348	0.841732	267	tags=36%, list=15%, signal=32%	P62829/P61353/P25398/P46781/Q9Y3U8/P62841/P18124/P27635/P61927/Q02878/P83731/P23396/P18621/P18077/P62273/P84098/P62899/P62851/P62081/P62854/P62750/P61254/P42766/P62906/P15880/P62249/P49207/P36578/P83881/Q02543/P62913/P63173/P46776/P05387/P05388
M2606	ZHOU_CELL_CYCLE_GENES_IN_IR_RESPONSE_6HR	11	-0.644592	-1.66528	0.0277143	0.842348	0.841732	157	tags=27%, list=9%, signal=25%	Q8IWU5/P16104/Q01469
M15540	GOBP_CELL_CELL_JUNCTION_ASSEMBLY	33	-0.446486	-1.51683	0.0277156	0.842348	0.841732	83	tags=15%, list=5%, signal=15%	P51153/Q16513/P35221/Q8WVV4/P21926
M4741	KEGG_SYSTEMIC_LUPUS_ERYTHEMATOSUS	23	-0.485156	-1.52933	0.0279521	0.843291	0.842674	309	tags=39%, list=18%, signal=33%	P00736/P84243/P62805/P01024/O75367/P0C0S5/P10155/Q16777/P16104
M14217	GOBP_REGULATION_OF_PROTEIN_LOCALIZATION_TO_CHROMOSOME_TELOMERIC_REGION	10	-0.655881	-1.64688	0.0283239	0.84591	0.845291	341	tags=70%, list=20%, signal=57%	P50990/P17987/P78371/P50991/P49368/O75367/O60832
M13893	GARY_CD5_TARGETS_DN	94	0.417928	1.41375	0.0287356	0.84591	0.845291	412	tags=32%, list=24%, signal=26%	Q9BQA1/O15160/Q07955/Q96KP4/P84103/P35232/Q9UBS4/P05198/Q08211/P09234/Q92499/Q92973/Q9NZ08/P13645/Q8NC51/Q9Y6Y8/P62318/Q8NI36/Q15084/P0DMV9/Q00059/P80723/P68366/Q7L014/Q13617/P11021/P23284/O15173/Q13619/Q01130
M10452	GOBP_REGULATION_OF_CALCIUM_MEDIATED_SIGNALING	10	0.680533	1.51622	0.0288544	0.84591	0.845291	340	tags=50%, list=20%, signal=40%	Q15493/P04156/P26599/P55290/P23634
M14674	GOBP_REGULATION_OF_SIGNAL_TRANSDUCTION_BY_P53_CLASS_MEDIATOR	24	-0.484492	-1.52772	0.029067	0.84591	0.845291	397	tags=50%, list=23%, signal=39%	P60866/Q7LG56/P62829/P62841/P61927/P53801/P62081/P61254/Q8TDI0/P62913/O75832/Q14146
M15103	DOUGLAS_BMI1_TARGETS_UP	88	0.417924	1.39681	0.0290698	0.84591	0.845291	426	tags=34%, list=25%, signal=27%	Q9Y4L1/P55058/O00592/Q9NRN5/Q9BUJ2/P53985/O43286/P26196/O43854/Q08211/P27361/P06396/Q9HAV7/P58546/Q8WTV0/Q16740/P47895/O60568/Q15427/Q9BUF5/P43121/Q99719/O15269/P80723/P15924/O14744/Q9Y230/P11234/O75390/P40189
M1605	BURTON_ADIPOGENESIS_4	15	-0.578895	-1.59967	0.0293402	0.847766	0.847146	310	tags=40%, list=18%, signal=33%	P50213/P49368/P39060/P09661/Q16864/P16104
M40437	GOBP_SMALL_MOLECULE_METABOLIC_PROCESS	261	0.346937	1.2964	0.0299897	0.860473	0.859843	532	tags=34%, list=31%, signal=28%	P01344/Q9H4L5/Q15493/P62136/P19367/P55058/P16152/P30049/P27708/Q9HB40/P07741/Q9Y5X9/Q8N142/O95498/P55263/Q93088/Q00266/P09874/O00469/P02656/Q9BPU6/P62328/P54577/O75947/O43776/P62140/P40261/P31939/P55809/P40926/P09972/O43252/P29317/Q06203/Q8WTV0/P21589/P43251/P21399/P06576/P05166/P26640/P09543/O43175/P48637/P22392/P47895/P00558/P17516/P26639/Q9Y5P6/O60568/Q6XQN6/Q9NZL9/P10253/P21796/P17405/O00408/…
M13654	GOBP_RECEPTOR_METABOLIC_PROCESS	35	-0.41857	-1.43093	0.0303576	0.86498	0.864347	170	tags=40%, list=10%, signal=37%	P02786/P02649/Q9Y371/P07355/P37840/Q9NUN5/Q00610/P22303/P60033/P01137/P42892/Q13596/P08962/P21926
M13232	GOBP_REGULATION_OF_CELL_ADHESION_MEDIATED_BY_INTEGRIN	12	0.657057	1.53016	0.0306614	0.867611	0.866977	391	tags=58%, list=23%, signal=45%	O00592/Q13443/P20827/P29317/P05121/P00749/P61812
M18090	NUYTTEN_NIPP1_TARGETS_DN	137	0.381	1.35016	0.0310421	0.871264	0.870627	409	tags=31%, list=24%, signal=25%	Q9H4L5/P10644/Q9H299/Q9HB40/Q13443/Q09666/Q9H4B7/P26599/P53985/Q04941/Q96AQ6/O00743/Q8IUD2/Q8IVM0/P47755/Q12765/P62140/Q96CG8/P29317/Q8NC51/Q15019/P46459/P61981/O00391/P51858/P63010/P04899/P47895/P16615/Q9NX76/Q9BRK5/P17405/Q9BUF5/P43121/Q96QD8/P21741/P60981/Q15293/P68366/P61812/Q86SQ4/P55011
M14232	GOBP_POSITIVE_REGULATION_OF_INTRACELLULAR_SIGNAL_TRANSDUCTION	135	0.381168	1.34529	0.0312152	0.871264	0.870627	324	tags=24%, list=19%, signal=21%	P01344/P49407/Q13443/Q02952/P02788/P26599/P20827/P08697/P23246/P35232/P35916/Q969H8/P00734/P18031/Q92499/O00429/P27361/P02679/O14786/P53041/O60826/P35968/P11362/P02675/P29692/P09382/O60271/P55290/P04899/P19022/P17813/P0DMV9
M13347	GOBP_POSITIVE_REGULATION_OF_INTERLEUKIN_1_PRODUCTION	10	0.672644	1.49864	0.0318917	0.884132	0.883485	383	tags=40%, list=22%, signal=31%	P19367/Q16666/O95361/P40763
M16647	REACTOME_CELL_CYCLE_CHECKPOINTS	78	-0.334517	-1.33729	0.0324402	0.884734	0.884087	287	tags=29%, list=17%, signal=26%	P62805/Q14204/O14818/P28062/P51665/P62195/P28066/O00232/Q9UL46/Q99436/P25789/O14980/P28065/Q13200/Q13409/O00487/P27348/P63167/O75832/P48556/P61289/P16104/P67775
M899	REACTOME_INTERLEUKIN_1_FAMILY_SIGNALING	49	-0.35637	-1.3309	0.0325414	0.884734	0.884087	281	tags=37%, list=16%, signal=32%	O14818/P28062/P51665/P62195/Q02750/Q9NPH3/P28066/O00232/Q9UL46/Q99436/Q13616/P25789/P28065/Q13200/O00487/O75832/P48556/P61289
M7721	BIOCARTA_EIF_PATHWAY	10	0.6695	1.49164	0.0327594	0.884734	0.884087	129	tags=30%, list=7%, signal=28%	Q04637/P41091/P05198
M15346	LEE_LIVER_CANCER_E2F1_DN	12	0.654423	1.52403	0.0327759	0.884734	0.884087	91	tags=25%, list=5%, signal=24%	Q15493/P36955/Q93088
M27662	REACTOME_M_PHASE	115	-0.297796	-1.25586	0.0334999	0.895153	0.894499	288	tags=27%, list=17%, signal=24%	P84243/P62805/Q14204/O14818/P28062/P51665/P62195/P28066/O00232/Q9UL46/P61019/P19784/O75531/Q99436/P25789/O14980/P0C0S5/P28065/Q13200/Q13409/O00487/P63167/P67870/P53990/P28482/O75832/P48556/Q16777/P61289/P16104/P67775
M22381	GOBP_AMP_BIOSYNTHETIC_PROCESS	12	0.652793	1.52023	0.0336217	0.895153	0.894499	230	tags=42%, list=13%, signal=36%	P07741/Q8N142/P55263/P31939/Q06203
M14033	REACTOME_MRNA_SPLICING	59	0.452882	1.4279	0.0338164	0.895153	0.894499	317	tags=32%, list=18%, signal=27%	P26599/Q9BUJ2/Q07955/P84103/Q6P2Q9/P31943/Q08211/P09234/Q01081/Q10570/Q15428/Q9Y333/Q15366/P14866/Q16629/P08579/P62318/O43172/Q15427
M16837	GOBP_RESPONSE_TO_CALCIUM_ION	21	0.578072	1.50556	0.0342433	0.900453	0.899795	401	tags=48%, list=23%, signal=37%	O75131/Q13443/P02679/Q13557/P02675/P35611/P17405/Q8N2Q7/P11021/Q92542
M15381	REACTOME_TCR_SIGNALING	45	-0.387758	-1.42935	0.0346092	0.900453	0.899795	281	tags=38%, list=16%, signal=32%	O14818/P28062/P51665/P62195/P28066/O00232/Q9UL46/Q99436/Q13616/P25789/P28065/Q13200/O00487/O75832/P19174/P48556/P61289
M8229	REACTOME_TRANSLATION	140	-0.275578	-1.21508	0.034675	0.900453	0.899795	252	tags=24%, list=15%, signal=22%	Q02878/Q969Q0/P83731/P23396/P18621/P18077/P62273/P84098/O15372/P62899/P62851/P62081/P49589/P62854/P62750/P61254/P42766/P62906/P15880/P62249/P49207/P36578/Q9UHB9/P83881/Q02543/P62913/P63173/P46776/Q9UI10/P05387/P05388/Q12904/Q15005
M6189	ELVIDGE_HIF1A_AND_HIF2A_TARGETS_DN	21	0.576896	1.50249	0.035459	0.909345	0.90868	492	tags=57%, list=28%, signal=41%	Q02952/P61073/Q08629/P09972/O00391/P05121/P00558/Q03405/O15460/Q6NZI2/P17302/P36871
M1497	LEE_AGING_NEOCORTEX_DN	14	-0.547529	-1.48014	0.0354607	0.909345	0.90868	210	tags=29%, list=12%, signal=25%	Q99436/P68032/P01008/Q01469
M14116	GOBP_GLIAL_CELL_MIGRATION	13	-0.594971	-1.57689	0.0359584	0.912308	0.911641	4	tags=15%, list=0%, signal=15%	P35222/P21926
M29843	REACTOME_PARASITE_INFECTION	24	-0.473617	-1.49343	0.0361656	0.912308	0.911641	145	tags=38%, list=8%, signal=35%	P63000/P61160/P60953/O15144/P08631/P28482/Q92747/O15145/Q9UKX2
M9331	YAUCH_HEDGEHOG_SIGNALING_PARACRINE_DN	14	0.623536	1.50584	0.0364656	0.912308	0.911641	115	tags=29%, list=7%, signal=27%	P01009/Q96M83/Q99715/Q9BZP6
M16119	GOBP_VITAMIN_METABOLIC_PROCESS	14	0.623045	1.50465	0.0364656	0.912308	0.911641	271	tags=43%, list=16%, signal=36%	Q15493/P55058/P16152/O95498/P40261/P43251
M9857	GOBP_CELLULAR_AMINO_ACID_METABOLIC_PROCESS	62	0.446933	1.41101	0.0368098	0.914704	0.914035	679	tags=50%, list=39%, signal=32%	P27708/Q93088/Q00266/O00469/P54577/O43776/Q06203/P26640/O43175/P48637/P26639/O60568/P23634/P13804/P09622/P16930/P36957/P38117/P47897/Q9P2J5/P00966/P49915/O15067/Q06210/P24752/Q16762/P30084/P25325/P00505/P56192/P22102
M17906	KEGG_VIBRIO_CHOLERAE_INFECTION	17	-0.529404	-1.55239	0.0380771	0.914704	0.914035	221	tags=35%, list=13%, signal=31%	Q9UI12/P61421/Q5JWF2/Q93050/P19174/Q16864
M27815	REACTOME_REGULATION_OF_PTEN_STABILITY_AND_ACTIVITY	45	-0.382477	-1.40989	0.0381012	0.914704	0.914035	281	tags=38%, list=16%, signal=32%	O14818/P28062/P51665/P62195/P28066/O00232/Q9UL46/P19784/Q99436/P25789/P28065/Q13200/O00487/P67870/O75832/P48556/P61289
M1170	HUMMERICH_SKIN_CANCER_PROGRESSION_DN	28	0.52523	1.47213	0.0382105	0.914704	0.914035	649	tags=64%, list=37%, signal=41%	P17661/P01009/P61626/P50895/P62140/Q8IUX7/P09382/P10586/P10253/P11217/P17302/O60462/P55084/Q13418/P02461/P30084/Q9NS15/Q9NPG4
M16779	GOBP_RESPONSE_TO_VIRUS	47	0.461482	1.40792	0.0385093	0.914704	0.914035	357	tags=32%, list=21%, signal=26%	Q13283/Q9BUJ2/P61073/P35232/Q9NV70/Q08211/P23528/Q92499/Q15366/Q16666/Q92841/O95352/P61966/P17405/P06733
M373	VILLANUEVA_LIVER_CANCER_KRT19_DN	12	0.645819	1.50399	0.0386966	0.914704	0.914035	118	tags=25%, list=7%, signal=23%	Q15493/P16152/P04278
M10845	GOLDRATH_IMMUNE_MEMORY	11	0.66196	1.49634	0.0387374	0.914704	0.914035	65	tags=27%, list=4%, signal=26%	P04156/Q9BZ29/P10301
M27107	REACTOME_FCGAMMA_RECEPTOR_FCGR_DEPENDENT_PHAGOCYTOSIS	29	-0.442793	-1.40917	0.0387499	0.914704	0.914035	145	tags=24%, list=8%, signal=22%	O15144/P08631/P28482/P19174/Q92747/O15145/Q9UKX2
M10880	STEARMAN_LUNG_CANCER_EARLY_VS_LATE_DN	15	0.611893	1.49857	0.038943	0.914704	0.914035	421	tags=60%, list=24%, signal=46%	P61626/Q7KZF4/Q14019/P23528/P13667/P04080/O95352/P80723/Q6NZI2
M14748	GOBP_MUSCLE_HYPERTROPHY	13	0.629618	1.49308	0.0390516	0.914704	0.914035	474	tags=54%, list=27%, signal=39%	P09874/P58546/Q13557/P16615/P23634/P40189/Q14457
M29076	GOBP_RIBONUCLEOSIDE_MONOPHOSPHATE_METABOLIC_PROCESS	21	0.572573	1.49123	0.0390836	0.914704	0.914035	266	tags=33%, list=15%, signal=29%	P27708/P07741/Q8N142/P55263/P31939/Q06203/P21589
M26923	REACTOME_ROS_AND_RNS_PRODUCTION_IN_PHAGOCYTES	10	-0.633713	-1.59122	0.0394596	0.914704	0.914035	221	tags=40%, list=13%, signal=35%	Q9UI12/P61421/Q93050/Q16864
M506	REACTOME_INSULIN_RECEPTOR_RECYCLING	10	-0.633713	-1.59122	0.0394596	0.914704	0.914035	221	tags=40%, list=13%, signal=35%	Q9UI12/P61421/Q93050/Q16864
M6376	MCCABE_BOUND_BY_HOXC6	22	-0.458442	-1.42158	0.0403264	0.920549	0.919875	191	tags=36%, list=11%, signal=33%	P02749/P45973/P19320/Q8IWU5/Q16181/P01008/P46776/Q15020
M1105	GRAESSMANN_APOPTOSIS_BY_DOXORUBICIN_DN	256	0.341989	1.27752	0.0403727	0.920549	0.919875	572	tags=35%, list=33%, signal=27%	Q9BQA1/Q6PCB0/P04156/P02787/Q99715/Q8N668/Q07666/Q02952/Q9BZ29/Q7KZF4/Q04941/P55263/P26196/Q07955/Q969T4/Q96CN7/Q8IUD2/P84103/Q8IVM0/P35268/P35232/P05997/Q9UNZ2/O14672/Q08211/Q969H8/P36873/O94855/O00429/P27361/Q00577/Q13838/Q13557/P11362/O43252/Q06203/P10586/P14866/Q16629/P47929/Q9UJW0/Q16740/P21589/P63010/Q9NUM4/P16615/P26639/Q01518/Q92841/O95361/Q9H8M9/Q12841/P52306/Q15417/P26038/Q13617/O75955/…
M27786	REACTOME_TRANSCRIPTIONAL_REGULATION_BY_RUNX1	64	-0.33139	-1.2901	0.0405019	0.920549	0.919875	303	tags=36%, list=18%, signal=31%	Q99873/P84243/P62805/O14818/P28062/P51665/P62195/P28066/O00232/Q9UL46/P19784/Q99436/P25789/P0C0S5/P28065/Q13200/O00487/P67870/O75832/P48556/Q16777/P61289/P16104
M9016	PROVENZANI_METASTASIS_DN	45	0.465862	1.40529	0.0406091	0.920549	0.919875	395	tags=40%, list=23%, signal=32%	P31431/P53680/P10301/P09758/P02792/P13646/P05198/Q14019/Q12765/P05121/Q15084/O60568/P52306/O15460/Q15293/Q14533/P13647/P00441
M10844	GOBP_RESPONSE_TO_ENDOPLASMIC_RETICULUM_STRESS	41	0.473458	1.41166	0.0417193	0.929696	0.929016	574	tags=51%, list=33%, signal=35%	Q9Y4L1/Q04637/Q8TCT9/Q96D15/P05198/P18031/Q9UHD9/P13667/Q13144/P30101/P16615/P0DMV9/O75955/P11021/P51572/P35443/P62333/Q9BS26/O94874/P62714/Q9NYU2
M15555	CHNG_MULTIPLE_MYELOMA_HYPERPLOID_UP	38	-0.392128	-1.37761	0.041792	0.929696	0.929016	343	tags=37%, list=20%, signal=30%	P46781/Q9Y3U8/P62841/P06748/P61927/P83731/P23396/P18077/P42766/P62249/P36578/P09496/P46776/P05387
M12353	FONTAINE_PAPILLARY_THYROID_CARCINOMA_UP	16	-0.553637	-1.57561	0.0420939	0.929696	0.929016	169	tags=31%, list=10%, signal=28%	Q08722/P06703/P35221/P60903/P08962
M2259	KIM_GLIS2_TARGETS_UP	29	-0.437687	-1.39292	0.0421194	0.929696	0.929016	276	tags=38%, list=16%, signal=32%	P35555/P28062/P01024/Q01628/P39060/P08603/P02452/P19320/P28065/P06703/P51884
M7140	ZHOU_INFLAMMATORY_RESPONSE_FIMA_UP	40	0.473307	1.40059	0.0421456	0.929696	0.929016	645	tags=55%, list=37%, signal=35%	P31431/O43286/P26196/Q8IUD2/Q96D15/P18031/Q9ULC0/O75144/P05121/P02538/P0DMV9/Q03405/P61812/P43490/P01130/P09603/P26232/P05362/P02461/P24752/P50452/P16070
M1210	GOBP_GENERATION_OF_PRECURSOR_METABOLITES_AND_ENERGY	91	0.402121	1.35187	0.0428241	0.939611	0.938924	576	tags=43%, list=33%, signal=30%	P01344/P62136/P19367/P30049/P36873/P13073/O75947/P62140/P55809/P40926/P09972/P43246/P21399/P06576/O43175/P00558/P17516/P10253/P11217/P13804/O15460/P06733/Q99798/P40763/P09622/O75390/P36957/P38117/P40189/Q99623/Q8IZF2/P36871/P61586/P06744/P14618/P40925/Q06210/P11216/P18669
M13186	MCBRYAN_PUBERTAL_BREAST_3_4WK_UP	40	0.470082	1.39104	0.0434227	0.947678	0.946985	409	tags=35%, list=24%, signal=27%	P01009/P19367/Q9Y5X9/P02788/P09758/P06396/P02679/P09972/O60687/P0DMV9/P33151/P80723/P15924/P55011
M27191	REACTOME_DNA_DAMAGE_TELOMERE_STRESS_INDUCED_SENESCENCE	16	-0.551015	-1.56815	0.0442387	0.956069	0.95537	350	tags=56%, list=20%, signal=45%	P07305/P16402/P17096/P62805/P16403/P10412/P0C0S5/Q16777/P16104
M15446	GOBP_FIBRINOLYSIS	11	0.654513	1.4795	0.0444763	0.956069	0.95537	483	tags=73%, list=28%, signal=53%	P08697/P00734/P00750/P02679/P02675/P05121/P00749/P03952
M22657	GOBP_REGULATION_OF_CELLULAR_CARBOHYDRATE_METABOLIC_PROCESS	15	0.609621	1.493	0.0445063	0.956069	0.95537	202	tags=33%, list=12%, signal=30%	P01344/Q15493/P62136/P62140/P40261
M848	REACTOME_MITOTIC_G1_PHASE_AND_G1_S_TRANSITION	53	-0.362885	-1.36661	0.0455512	0.956958	0.956258	281	tags=32%, list=16%, signal=28%	O14818/P28062/P51665/P62195/P28066/O00232/Q9UL46/Q99436/Q13616/P25789/P28065/Q13200/O00487/O75832/P48556/P61289/P67775
M2611	ZWANG_CLASS_1_TRANSIENTLY_INDUCED_BY_EGF	64	0.438118	1.39434	0.0456731	0.956958	0.956258	473	tags=42%, list=27%, signal=32%	Q9H4L5/Q92930/P31431/P08779/Q02952/Q9Y5X9/Q15018/Q99439/P18031/P21291/O14786/Q13557/Q06203/O95361/Q96QD8/P15151/Q15417/P00749/Q05682/P61812/P62241/Q32MZ4/P40189/Q9BQ51/Q562R1/P01130/Q9H2G2
M8349	MARCHINI_TRABECTEDIN_RESISTANCE_DN	22	0.555512	1.47155	0.0461133	0.956958	0.956258	431	tags=45%, list=25%, signal=35%	P04156/P27708/Q15758/P50895/P55290/P01889/Q12841/P11021/Q16270/P08195
M715	REACTOME_GENE_SILENCING_BY_RNA	17	-0.519492	-1.52332	0.0461784	0.956958	0.956258	288	tags=29%, list=17%, signal=25%	P84243/P62805/P0C0S5/Q16777/P16104
M13156	GOBP_CYTOKINE_PRODUCTION	102	0.390264	1.33732	0.0462232	0.956958	0.956258	467	tags=33%, list=27%, signal=26%	P19367/P04156/P49407/Q02952/Q13283/P02788/Q14699/P08697/P35232/Q9BZP6/P35916/Q08211/P00734/Q92499/P62328/P29317/P47929/O75144/P05121/Q16666/O95361/P01889/P0DMV9/P21741/O75955/P40763/Q12866/P61812/P00441/P40189/Q9BQ51/P10809/P02647/P62820
M4605	FONTAINE_FOLLICULAR_THYROID_ADENOMA_UP	12	0.635013	1.47883	0.0464135	0.956958	0.956258	131	tags=25%, list=8%, signal=23%	Q04637/Q96AQ6/P35916
M39401	WP_MECP2_AND_ASSOCIATED_RETT_SYNDROME	12	0.634344	1.47727	0.0464135	0.956958	0.956258	281	tags=42%, list=16%, signal=35%	P01344/P31943/Q08211/P21291/P09543
M15039	GOBP_ASPARTATE_FAMILY_AMINO_ACID_METABOLIC_PROCESS	12	0.633813	1.47603	0.0464135	0.956958	0.956258	466	tags=58%, list=27%, signal=43%	Q93088/Q00266/O00469/O43175/O60568/P36957/P00966
M40348	GOBP_CALCIUM_ION_TRANSPORT	36	0.484141	1.4111	0.0484694	0.978871	0.978156	340	tags=33%, list=20%, signal=27%	Q15493/P04156/Q09666/P61073/P00734/O60610/O00429/Q13557/P04899/P16615/P21796/P23634
M23575	GOBP_AMYLOID_PRECURSOR_PROTEIN_CATABOLIC_PROCESS	11	0.648989	1.46702	0.0487805	0.978871	0.978156	127	tags=27%, list=7%, signal=25%	P04156/P20827/O14672
M9565	AGUIRRE_PANCREATIC_CANCER_COPY_NUMBER_UP	66	-0.318023	-1.24257	0.0488053	0.978871	0.978156	177	tags=24%, list=10%, signal=23%	P30419/Q16563/P28799/P62316/P54920/Q8N1I0/O75340/P62879/Q9UKK3/P09496/Q93050/Q92747/P48556/P61289/P51148/P15531
M2317	KASLER_HDAC7_TARGETS_1_UP	31	0.496594	1.41024	0.0492866	0.978871	0.978156	305	tags=29%, list=18%, signal=24%	Q9H4L5/P01266/Q02952/Q12907/Q14699/P53041/P26640/P16615/Q01518
M11768	GOBP_NEGATIVE_REGULATION_OF_PROTEIN_CATABOLIC_PROCESS	34	-0.415808	-1.40924	0.0495322	0.978871	0.978156	263	tags=26%, list=15%, signal=23%	P07355/O15294/P37840/P19784/O15372/P62081/Q9H2J4/P62913/Q96P63
M12907	GOBP_PROTEIN_LOCALIZATION_TO_CHROMOSOME_TELOMERIC_REGION	12	-0.60209	-1.57617	0.049612	0.978871	0.978156	341	tags=67%, list=20%, signal=54%	P50990/P17987/P78371/P50991/P49368/O75367/O60832/P13010
M10881	GOBP_ALTERNATIVE_MRNA_SPLICING_VIA_SPLICEOSOME	17	0.581934	1.45491	0.0496552	0.978871	0.978156	310	tags=41%, list=18%, signal=34%	Q07666/P26599/Q07955/P23246/Q08211/P14866/Q92841
M15156	GOBP_PURINE_NUCLEOSIDE_MONOPHOSPHATE_BIOSYNTHETIC_PROCESS	16	0.587059	1.45558	0.0497925	0.978871	0.978156	230	tags=31%, list=13%, signal=27%	P07741/Q8N142/P55263/P31939/Q06203
M5539	KEGG_AXON_GUIDANCE	23	0.545674	1.4647	0.0499343	0.978871	0.978156	280	tags=39%, list=16%, signal=33%	P20827/P61073/O75051/P23528/Q9BPU6/P27361/O14786/P29317/P04899

## Sheet: 10% O2
ID	Description	setSize	enrichmentScore	NES	pvalue	p.adjust	qvalue	rank	leading_edge	core_enrichment
M40437	GOBP_SMALL_MOLECULE_METABOLIC_PROCESS	261	0.398744	1.80964	5.00138e-07	0.00205207	0.00198423	427	tags=36%, list=25%, signal=32%	O00469/P27708/Q9Y5P6/P55263/P62136/Q15493/P43251/P17405/Q9H4L5/Q13510/P01344/Q8WTV0/P02771/Q9Y5X9/P53602/P47895/P48163/P38117/Q93088/P22392/P21399/P09972/P37268/P09874/P07954/P28482/O95497/P16152/O95498/P48506/P31937/Q9NTJ4/P17858/Q00266/Q01433/P00338/Q9NR45/P23634/P30837/Q08043/P01024/O15269/P09960/P09622/P07195/P07902/P43490/P06858/Q15046/Q06203/P00492/P23921/P00813/P17174/P46926/P38606/P01130/…
M42929	GOBP_NITROGEN_COMPOUND_TRANSPORT	305	-0.366559	-1.6988	5.22158e-06	0.0107121	0.010358	425	tags=34%, list=25%, signal=31%	Q9BXJ4/P20339/P54920/Q96QK1/P02786/Q9Y5K6/O75915/P13473/Q9H009/O15173/P02679/P42704/O75340/Q86XX4/P09651/P51991/P61020/P36405/Q9BXJ0/O60684/P35580/Q00610/P11142/O00159/P30419/Q9NVJ2/O94832/Q07666/P17987/Q9H444/Q13263/P46459/P29590/Q13637/P60033/P12644/Q15758/O00203/P50395/P09496/O14579/P27797/Q15286/P27348/Q9P0V3/P62937/P60953/Q86Y82/P19784/P05556/P18085/Q8IUD2/Q03135/P49747/Q15436/Q16543/P04792/…
M40441	GOBP_ESTABLISHMENT_OF_PROTEIN_LOCALIZATION	287	-0.368279	-1.69571	9.99219e-06	0.013666	0.0132142	430	tags=34%, list=25%, signal=31%	P55072/P50990/Q9BXJ4/P20339/P54920/Q96QK1/P02786/O75367/Q9Y5K6/O75915/P13473/Q9H009/P02679/O75340/Q86XX4/P61020/P49368/P36405/Q9BXJ0/O60684/P35580/Q00610/P11142/O00159/P30419/Q9NVJ2/P11279/O94832/P17987/Q9H444/Q13263/P46459/P29590/P48059/Q13637/O15118/P60033/P12644/O00203/P50395/P09496/O14579/O60832/P27797/Q15286/P16401/P27348/P62937/P60953/Q86Y82/P19784/P48643/P18085/Q8IUD2/P50991/Q03135/P49747/…
M5314	MILI_PSEUDOPODIA_HAPTOTAXIS_DN	141	-0.417656	-1.75707	7.03759e-05	0.0721881	0.0698018	119	tags=16%, list=7%, signal=17%	Q9BVK6/Q14697/P16615/P01137/Q15084/P08648/P07996/P28799/Q9BTV4/Q96N66/P51572/Q99623/P20827/Q5ZPR3/Q96QD8/P53801/Q08722/O43934/O14828/P21926/Q9BVC6/Q8NG11/Q15005
M11413	GOBP_VESICLE_MEDIATED_TRANSPORT	277	-0.335274	-1.54196	0.000219442	0.108858	0.105259	341	tags=30%, list=20%, signal=29%	Q00610/Q12765/P11142/Q9NVJ2/O43795/P11279/O94832/P00441/P02647/Q9H444/P46459/Q13464/Q13637/O15118/P60033/Q92556/O00203/P50395/O75923/P09496/O14579/P04899/P27797/Q15286/P61978/Q9P0V3/P02765/Q9BRK5/P60953/Q86Y82/P05556/P17931/P48509/P18085/Q8IUD2/P08631/Q03135/Q15436/Q96KP1/P62745/Q9BV40/P56377/Q99439/Q6DD88/Q96D71/P61106/O75396/Q9UPT5/Q12846/Q9H0U4/P53621/P61769/Q99584/P61163/Q9BVK6/P63000/P05106/…
M14117	GOBP_ORGANIC_ACID_METABOLIC_PROCESS	157	0.395959	1.69249	0.000232163	0.108858	0.105259	433	tags=38%, list=25%, signal=31%	O00469/P27708/Q15493/P43251/Q9H4L5/Q13510/Q9Y5X9/P47895/P48163/P38117/Q93088/P21399/P09972/P07954/O95497/P16152/O95498/P48506/P31937/P17858/Q00266/P00338/P23634/Q08043/P01024/P09960/P09622/P07195/P06858/Q15046/Q06203/P17174/P46926/O00154/P31939/O75390/Q01813/Q8TDQ7/P06744/P36871/Q9UJ70/P30520/P13804/P12955/P49915/P04075/P49588/O75874/P11586/Q9HB40/P40926/Q01469/P04424/P49748/P42765/P26639/Q8NFW8/…
M27640	REACTOME_KERATINIZATION	29	0.645599	2.03524	0.000236688	0.108858	0.105259	122	tags=31%, list=7%, signal=29%	Q14574/Q86Y46/P13646/Q02413/Q6KB66/Q08554/Q15517/Q14533/P08779
M27649	REACTOME_FORMATION_OF_THE_CORNIFIED_ENVELOPE	29	0.645599	2.03524	0.000236688	0.108858	0.105259	122	tags=31%, list=7%, signal=29%	Q14574/Q86Y46/P13646/Q02413/Q6KB66/Q08554/Q15517/Q14533/P08779
M40389	GOBP_CELL_MIGRATION	255	-0.345254	-1.5691	0.000238781	0.108858	0.105259	282	tags=25%, list=16%, signal=24%	P60033/P23284/P12644/Q92556/O15123/O00214/P26232/P04899/P27797/O95747/P62937/P60953/P05556/P17931/P48509/P18085/P08631/Q03135/P09493/Q16658/O00151/P04792/P62745/Q10589/Q99439/Q9UHI8/Q9Y2A7/Q13418/P35221/Q12846/P07737/Q9BPX5/P63000/P05106/P08133/P01137/P17813/P29508/P08648/P62820/P07996/Q10588/P31151/Q9Y5Y7/P06756/O00501/P09758/P28799/P16070/Q12904/P04083/P12429/P08962/Q96N66/Q6UXH8/P51153/Q99623/…
M14134	TURASHVILI_BREAST_DUCTAL_CARCINOMA_VS_DUCTAL_NORMAL_DN	28	0.644761	2.00867	0.000328368	0.119637	0.115683	153	tags=39%, list=9%, signal=36%	P01833/O95969/Q14574/P01009/P78423/P02787/P02788/P47895/P05156/P08779/Q15746
M13283	HSIAO_LIVER_SPECIFIC_GENES	70	0.479871	1.77993	0.000368461	0.119637	0.115683	217	tags=24%, list=13%, signal=22%	Q04756/O00469/Q15493/P01009/Q14624/P08697/P02787/P05121/Q93088/P00742/P05156/P05546/P12259/P0C0L4/P01031/P01024/P43490
M42639	GOBP_ION_TRANSPORT	117	-0.42219	-1.72602	0.000376636	0.119637	0.115683	309	tags=34%, list=18%, signal=30%	P78417/P46459/P29590/Q16864/O75947/Q15758/P04899/P21283/O95747/P51798/P61421/P05556/P36543/P17931/Q03135/Q9BV40/P21796/P61769/P05106/P54709/P16615/P08133/O00161/P07602/P06756/Q8N668/P07355/P35670/Q9Y277/P04083/P08962/Q15041/P56385/P45880/Q99623/Q15836/Q96QD8/Q08722/Q9UHG3/Q9BVC6
M15640	GOBP_CELL_SUBSTRATE_ADHESION	98	-0.442306	-1.75464	0.000379061	0.119637	0.115683	147	tags=22%, list=8%, signal=22%	Q13418/P36404/P63000/P05106/P07237/O43854/O15144/P08648/P62820/P07996/P60903/Q10588/Q9Y5Y7/P06756/P09758/P16070/P08962/P27658/Q14112/P20827/Q15836/P55290
M14098	BROWNE_HCMV_INFECTION_24HR_DN	39	-0.563584	-1.87846	0.000530946	0.155605	0.150461	208	tags=31%, list=12%, signal=28%	P17931/Q03135/P61769/P12111/P07996/P60903/Q10588/P16070/P13987/P27658/P55290/P62070
M11041	GOBP_MEMBRANE_FUSION	28	-0.607174	-1.88224	0.000632516	0.160363	0.155062	325	tags=46%, list=19%, signal=38%	Q9NVJ2/P46459/O75923/Q86Y82/Q9BV40/O75396/Q12846/O00161/P07355/P04083/P51153/Q15836/P21926
M42984	GOBP_EXPORT_FROM_CELL	107	-0.421984	-1.71028	0.00066034	0.160363	0.155062	352	tags=39%, list=20%, signal=33%	Q9BXJ4/P20339/P54920/Q96QK1/Q9Y5K6/P02679/Q9BXJ0/P35580/P05023/Q12765/Q9NVJ2/P11279/P46459/Q15758/P04899/P62937/Q9BRK5/P08631/P49747/Q96KP1/Q32P28/Q9BV40/Q9UPT5/Q12846/Q99584/P54709/P16615/P01137/P17813/O00161/P62820/O14964/P61026/P35670/Q12904/P62834/P04083/P12429/P27824/P51153/Q15836/Q92905
M42753	GOBP_ION_TRANSMEMBRANE_TRANSPORT	79	-0.451237	-1.72962	0.000664433	0.160363	0.155062	309	tags=34%, list=18%, signal=29%	P78417/Q16864/O75947/Q15758/P21283/O95747/P51798/P61421/P05556/P36543/Q03135/P21796/P54709/P16615/P08133/P06756/Q8N668/P07355/P35670/Q9Y277/P08962/Q15041/P56385/P45880/Q99623/Q9UHG3/Q9BVC6
M16643	VERRECCHIA_DELAYED_RESPONSE_TO_TGFB1	15	-0.747756	-1.9525	0.000812626	0.180119	0.174165	147	tags=47%, list=8%, signal=43%	Q13418/P35221/P63000/P05106/P08648/P07996/P27658
M14322	GOBP_VASCULOGENESIS	13	-0.751845	-1.92601	0.000872821	0.180119	0.174165	192	tags=38%, list=11%, signal=34%	Q03135/P01137/P17813/P06756/P62834
M16441	REACTOME_INTEGRIN_CELL_SURFACE_INTERACTIONS	39	-0.548443	-1.82799	0.000955785	0.180119	0.174165	460	tags=46%, list=27%, signal=35%	Q03692/P04275/P13598/P02679/P08572/P20908/P39060/P02462/P05556/P49747/P05106/P12111/P08648/P07996/P06756/P16070/P27658/Q08722
M6856	KEGG_HEMATOPOIETIC_CELL_LINEAGE	12	-0.758696	-1.90348	0.000960887	0.180119	0.174165	113	tags=42%, list=7%, signal=39%	P05106/P08648/P16070/P13987/P21926
M42640	GOBP_ANION_TRANSPORT	29	-0.593407	-1.84292	0.00107805	0.180119	0.174165	272	tags=41%, list=16%, signal=35%	Q15758/P51798/P05556/P21796/P07602/Q9Y277/P04083/Q15041/P45880/Q96QD8/Q08722/Q9UHG3
M40425	GOBP_LOCOMOTION	292	-0.318385	-1.46692	0.00114601	0.180119	0.174165	298	tags=24%, list=17%, signal=24%	P29590/Q9BPU6/Q13464/P60033/P23284/P12644/Q92556/O15123/O00214/P26232/P04899/P27797/O95747/P62937/P60953/P05556/P17931/P48509/P18085/P08631/Q03135/P54578/P09493/Q16658/O00151/P04792/P62745/Q10589/Q99439/Q9UHI8/Q9Y2A7/Q13418/P35221/Q12846/O15145/P07737/Q9BPX5/P63000/P05106/P08133/P01137/P17813/P29508/O15144/P08648/P62820/P07996/Q10588/P31151/Q19T08/Q9Y5Y7/P06756/O00501/P09758/P28799/P16070/Q12904/…
M8154	GOBP_REGULATION_OF_CELL_ADHESION	140	-0.3815	-1.60457	0.00114601	0.180119	0.174165	308	tags=28%, list=18%, signal=25%	P02647/P29590/Q13464/P48059/P60033/P12644/O00203/O15123/P27797/P60953/Q15582/P17931/Q03135/P09493/Q13418/P36404/Q12846/P61769/P63000/P07237/P01137/O43854/O15144/P08648/P07996/P60903/Q10588/P06756/P09758/P16070/P67775/P04083/P27658/Q03405/P20827/Q5ZPR3/Q08722/P55290/P21926
M16852	GOBP_ORGANELLE_FUSION	22	-0.63899	-1.86979	0.00119704	0.180119	0.174165	262	tags=55%, list=15%, signal=47%	Q9NVJ2/O75923/Q86Y82/Q99536/Q9BV40/O75396/Q12846/O00161/P07355/P04083/P51153/Q15836
M14858	GOBP_HOMOTYPIC_CELL_CELL_ADHESION	31	-0.58017	-1.82747	0.00120532	0.180119	0.174165	234	tags=29%, list=14%, signal=26%	P62937/P49747/P04792/Q13418/P05106/P68871/Q03405/P21291/P21926
M1195	PATIL_LIVER_CANCER	127	-0.388637	-1.6191	0.00130834	0.180119	0.174165	304	tags=35%, list=18%, signal=31%	Q06830/Q13098/Q9P2B2/P13473/P08572/P78527/P19174/O00592/P67870/P27707/Q13263/P07305/P02462/Q92556/P60228/O15212/P27797/O75832/Q14204/P08865/Q15172/P48643/Q99536/P50991/P60866/P36404/Q92542/P29508/O14964/P60903/P61626/P07355/P28799/Q9H1C7/Q96N66/P27824/P51572/P20827/P16104/Q567U6/Q08722/Q92905/O14828/Q16563
M11212	GOBP_NEGATIVE_REGULATION_OF_ENDOCYTOSIS	11	-0.763692	-1.8738	0.00138041	0.180119	0.174165	208	tags=55%, list=12%, signal=48%	P17931/Q03135/P63000/P05106/P06756/P07355
M9857	GOBP_CELLULAR_AMINO_ACID_METABOLIC_PROCESS	62	0.475514	1.74371	0.00145368	0.180119	0.174165	500	tags=39%, list=29%, signal=29%	O00469/P27708/P38117/Q93088/P48506/P31937/Q00266/P23634/P09622/Q15046/Q06203/P17174/P30520/P13804/P12955/P49915/P49588/P11586/P04424/P26639/Q16762/P23381/P22102/P48637
M13582	GOBP_SECRETION	113	-0.404477	-1.65029	0.00145633	0.180119	0.174165	352	tags=32%, list=20%, signal=27%	Q9BXJ0/P35580/Q12765/Q9NVJ2/P11279/P46459/Q15758/P04899/P62937/Q9BRK5/P08631/Q03135/P49747/Q96KP1/Q32P28/Q9BV40/Q9UPT5/Q12846/P53621/Q99584/P16615/P01137/P17813/O00161/P62820/O14964/P61026/P35670/Q12904/P62834/P04083/P12429/P27824/P51153/Q15836/Q92905
M15600	GOBP_LOCALIZATION_WITHIN_MEMBRANE	122	-0.38459	-1.58868	0.00146727	0.180119	0.174165	355	tags=32%, list=21%, signal=27%	P36405/O75116/Q00610/O00159/P30419/Q9H444/P46459/Q13464/Q13637/O15118/P60033/O00203/Q15286/P05556/P17931/Q15172/Q03135/Q15436/Q96KP1/Q9BV40/P61106/Q9UPT5/Q12846/P63000/P54709/P01137/P07602/O14964/P60903/Q8N668/P61026/P62834/Q15041/P51153/Q15836/Q567U6/P55290/Q8NG11/Q14699
M12217	GOBP_SMALL_MOLECULE_BIOSYNTHETIC_PROCESS	76	0.464111	1.75376	0.00147152	0.180119	0.174165	427	tags=42%, list=25%, signal=33%	O00469/P27708/P55263/Q15493/Q9H4L5/Q13510/Q9Y5X9/P53602/P47895/Q93088/P37268/P16152/P23634/O15269/P09960/P06858/P00492/P00813/P17174/O00154/Q93009/P06744/P36871/P04062/P11586/P40261/Q01469/P04424/P49748/Q16531/P42765/P53396
M6750	SENGUPTA_NASOPHARYNGEAL_CARCINOMA_WITH_LMP1_DN	20	0.664679	1.9089	0.00152193	0.180119	0.174165	61	tags=20%, list=4%, signal=20%	Q96DA0/P01833/P01009/P02787
M19541	REN_ALVEOLAR_RHABDOMYOSARCOMA_DN	173	-0.355682	-1.55028	0.00155019	0.180119	0.174165	258	tags=23%, list=15%, signal=21%	O00214/P09496/P04899/P61421/Q86Y82/Q15582/P48509/P18085/Q99536/Q03135/Q32P28/Q99439/Q16270/P07099/O15145/Q99584/P63000/P07237/P01137/P17813/O00161/O43854/P08648/P62820/P07996/P60903/P06756/P08758/P07355/P28799/P04083/Q9BTV4/P27658/Q03405/P51572/Q15836/P09497/P51148/Q14699
M23816	GOBP_INTRACELLULAR_TRANSPORT	275	-0.321477	-1.47701	0.00157603	0.180119	0.174165	341	tags=28%, list=20%, signal=27%	Q00610/P11142/O00159/Q13409/P30419/Q9NVJ2/O43795/P11279/P23246/O94832/Q07666/P00441/Q9H444/Q13263/P46459/P29590/Q13637/O75947/O15118/P60033/P12644/Q9NUM4/O00203/Q9BQE3/P09496/O14579/P27797/Q15286/P27348/P61421/P60953/P62841/P68363/Q86Y82/P19784/Q14204/P18085/Q8IUD2/Q15436/Q16543/P04792/P62745/P56377/Q6DD88/Q96D71/P61106/O75396/Q08J23/Q12846/Q9H0U4/P53621/Q9BVK6/P16615/P01137/Q8TCT9/P62820/P07602/…
M22575	GOBP_RIBONUCLEOSIDE_MONOPHOSPHATE_BIOSYNTHETIC_PROCESS	16	0.676442	1.81301	0.00158037	0.180119	0.174165	334	tags=62%, list=19%, signal=51%	P27708/P55263/Q01433/Q06203/P00492/P00813/Q8N142/P31939/P30520/P49915
M1231	GOBP_EXOCYTOSIS	54	-0.483324	-1.73375	0.0017213	0.190294	0.184003	340	tags=41%, list=20%, signal=34%	Q12765/Q9NVJ2/P11279/P46459/P04899/Q9BRK5/P08631/Q96KP1/Q9BV40/Q9UPT5/Q12846/Q99584/P16615/O00161/O14964/P61026/P62834/P04083/P12429/P51153/Q15836/Q92905
M39355	WP_PROSTAGLANDIN_SYNTHESIS_AND_REGULATION	11	-0.756746	-1.85676	0.00176241	0.190294	0.184003	105	tags=55%, list=6%, signal=52%	P08133/P60903/P08758/P07355/P04083/P12429
M14109	GOBP_SIGNAL_TRANSDUCTION_BY_P53_CLASS_MEDIATOR	30	-0.584657	-1.84516	0.00185017	0.194647	0.188213	298	tags=40%, list=17%, signal=34%	P29590/P46777/Q14137/O75832/P61978/P61927/P62841/P60866/P16070/Q8TDI0/P53801/Q9BVC6
M12424	GOBP_NEGATIVE_REGULATION_OF_TRANSPORT	57	-0.470155	-1.68696	0.00205381	0.20265	0.195951	262	tags=32%, list=15%, signal=28%	O75923/P04899/O95747/P17931/Q03135/Q9BV40/Q99439/P21796/P63000/P05106/P07996/P06756/Q8N668/P07355/P62834/P04083/Q15836/Q08722
M16266	GOBP_TRANSMEMBRANE_TRANSPORT	97	-0.415583	-1.64443	0.00205831	0.20265	0.195951	309	tags=31%, list=18%, signal=27%	P78417/Q16864/O75947/P02774/Q15758/P21283/O95747/P51798/P61421/P05556/P36543/Q03135/P21796/P54709/P16615/P08133/P07996/P06756/Q8N668/P07355/P35670/Q9Y277/P08962/Q15041/P56385/P45880/Q99623/Q96QD8/Q9UHG3/Q9BVC6
M14674	GOBP_REGULATION_OF_SIGNAL_TRANSDUCTION_BY_P53_CLASS_MEDIATOR	24	-0.615389	-1.82298	0.00207441	0.20265	0.195951	298	tags=46%, list=17%, signal=38%	P29590/P46777/Q14137/O75832/P61978/P61927/P62841/P60866/P16070/Q8TDI0/P53801
M1941	MEISSNER_BRAIN_HCP_WITH_H3K4ME3_AND_H3K27ME3	88	-0.421885	-1.64877	0.00220737	0.210624	0.203661	272	tags=35%, list=16%, signal=31%	O00592/P43121/P20908/P39060/Q14258/Q9BPU6/Q15758/Q9BQE3/O75923/Q99715/P16401/P17931/P09493/O00151/Q99439/Q16270/P01137/Q8IWU5/P08648/O00501/P07355/P09758/P35670/P08962/Q6UXH8/Q14112/Q9UKP4/P31949/P55290/P62070/P21926
M19048	RUIZ_TNC_TARGETS_DN	27	-0.587382	-1.78801	0.00242359	0.225153	0.21771	250	tags=33%, list=14%, signal=29%	O60832/Q9P0V3/Q03135/P09493/P07996/P16070/P16104/P62070/Q14699
M16312	REACTOME_CELL_SURFACE_INTERACTIONS_AT_THE_VASCULAR_WALL	36	-0.534784	-1.75566	0.00256029	0.225153	0.21771	265	tags=33%, list=15%, signal=29%	O15123/P62937/P05556/Q03135/Q96AP7/P05106/P54709/P01137/P08648/P06756/P16070/Q08722
M15870	GOBP_CELLULAR_MACROMOLECULE_LOCALIZATION	298	-0.306801	-1.41972	0.00264007	0.225153	0.21771	359	tags=27%, list=21%, signal=25%	P61020/P49368/P36405/O75116/O60684/Q00610/P11142/O00159/P30419/P11279/P17987/Q9H444/Q13263/P46459/P29590/Q13464/Q13637/O15118/P60033/P12644/O00203/P50395/O43684/P09496/O60832/P27797/Q15286/P16401/P27348/Q9P0V3/P60953/Q86Y82/P19784/P05556/P17931/Q15172/P48643/P18085/P50991/Q03135/Q15436/Q16543/P04792/Q96AP7/P40227/P62745/Q9BV40/P56377/Q92499/P61106/Q9UPT5/P36404/P35221/Q12846/Q9H0U4/P53621/Q9BVK6/…
M8071	GOBP_ANATOMICAL_STRUCTURE_FORMATION_INVOLVED_IN_MORPHOGENESIS	196	-0.336547	-1.48867	0.00264541	0.225153	0.21771	409	tags=34%, list=24%, signal=29%	Q9NZ08/Q9P2B2/O75367/Q9NZM1/Q16394/P08572/P17948/P21980/O75340/P35556/Q02750/P78527/P19174/O00592/P43121/P30408/Q9GZX9/P20908/P49746/P50552/O75116/O15031/P39060/P29590/Q13464/P60033/P02462/P12644/O15123/Q99715/Q13045/P58546/P60953/Q15582/P05556/Q969H8/Q13547/Q03135/P09493/Q9BXJ9/P04792/P62745/Q8IZP0/Q9UHI8/P07737/P05106/P01137/P17813/P08648/P07996/O14964/P31151/Q19T08/P06756/O00501/P07355/P28799/…
M11923	GOBP_POSITIVE_REGULATION_OF_CELL_ADHESION	83	-0.424327	-1.64899	0.00272506	0.225153	0.21771	308	tags=33%, list=18%, signal=28%	P02647/Q13464/P48059/P60033/O00203/P27797/P60953/Q03135/P09493/Q13418/P36404/Q12846/P61769/P63000/P07237/O43854/O15144/P08648/P60903/P06756/P16070/P04083/P27658/Q03405/Q5ZPR3/Q08722/P55290
M12989	GOBP_ORGANELLE_MEMBRANE_FUSION	19	-0.670399	-1.88294	0.00279136	0.225153	0.21771	325	tags=58%, list=19%, signal=48%	Q9NVJ2/O75923/Q86Y82/Q9BV40/O75396/Q12846/O00161/P07355/P04083/P51153/Q15836
M11197	HSIAO_HOUSEKEEPING_GENES	237	-0.324683	-1.46429	0.00283342	0.225153	0.21771	484	tags=36%, list=28%, signal=30%	P10809/P25705/O00303/P55209/P62328/P62244/P46782/P60981/P62753/P08621/P12270/P05387/P62857/P62851/P28072/Q13200/Q06830/Q00325/Q13098/P62750/P62424/P08708/P62191/P46778/P78344/P09651/P04080/P00387/P67870/Q00610/Q13435/P11279/P62906/P00441/P78417/Q13263/Q16864/P49207/P60033/P09211/P60228/P50395/P09496/P27348/P61978/P62937/P62841/P26373/P08865/P05556/P17931/P18085/P50991/Q13547/P62873/P0C0S5/Q02543/…
M2098	MARTENS_TRETINOIN_RESPONSE_UP	49	0.500275	1.73733	0.00285042	0.225153	0.21771	198	tags=22%, list=11%, signal=20%	Q96DA0/Q04756/P01009/Q9BY76/P01266/Q9H3T3/Q9C0C9/P50895/Q9NRY6/P30837/P35908
M42806	GOBP_REGULATED_EXOCYTOSIS	28	-0.567563	-1.75945	0.00285351	0.225153	0.21771	325	tags=61%, list=19%, signal=50%	Q8N2Q7/P20339/P54920/Q9NVJ2/P11279/P04899/Q9BRK5/P08631/Q9BV40/Q12846/Q99584/P16615/O00161/P61026/P62834/P12429/Q15836
M1810	DAZARD_UV_RESPONSE_CLUSTER_G6	11	0.770283	1.88935	0.00301279	0.231519	0.223866	186	tags=45%, list=11%, signal=41%	Q9UPU5/O43815/Q9BZ29/Q14517/Q13616
M4735	WANG_LMO4_TARGETS_UP	42	-0.509274	-1.72772	0.00310206	0.231519	0.223866	277	tags=40%, list=16%, signal=35%	Q9NUM4/O00214/P22061/Q32MZ4/P27797/P48509/P62745/Q99584/P07996/P53999/P61026/P28799/P51572/Q99623/Q08722/Q9UHG3/Q16563
M11969	GOBP_NUCLEOBASE_CONTAINING_SMALL_MOLECULE_METABOLIC_PROCESS	103	0.403527	1.5951	0.00320229	0.231519	0.223866	372	tags=36%, list=21%, signal=30%	P27708/Q9Y5P6/P55263/P53602/P48163/P22392/P09972/P09874/P28482/P17858/Q01433/P00338/Q9NR45/Q08043/P09622/P07902/P43490/Q15046/Q06203/P00492/P23921/P00813/P38606/O00154/Q8N142/P31939/Q01813/Q9NVE7/P06744/P36871/P30520/O00408/P49915/P04075/Q14117/P11586/P40261
M11274	GOBP_NEUROTRANSMITTER_TRANSPORT	17	-0.657343	-1.78967	0.00325925	0.231519	0.223866	219	tags=59%, list=13%, signal=52%	Q8N2Q7/P20339/P54920/P05556/Q12846/P05106/P16615/O00161/P62834/Q96QD8
M16534	GOBP_BIOLOGICAL_ADHESION	278	-0.306676	-1.41164	0.00331607	0.231519	0.223866	298	tags=25%, list=17%, signal=24%	P29590/Q13464/P48059/P60033/P12644/O00203/O15123/P26232/Q99715/P27797/P62937/P60953/Q15582/P08865/P05556/P15151/P17931/P48509/P08631/Q03135/P09493/P49747/O00151/P04792/Q96AP7/P62745/Q13418/P36404/Q16270/P35221/Q12846/P61769/P63000/P05106/P12111/P16615/P07237/P01137/P17813/Q5D862/P68871/O43854/O15144/P08648/P62820/P07996/P60903/Q10588/Q9Y5Y7/P06756/P61026/O00501/P07355/P09758/P16070/P67775/P04083/…
M27656	REACTOME_COOPERATION_OF_PDCL_PHLP1_AND_TRIC_CCT_IN_G_PROTEIN_BETA_FOLDING	16	-0.667066	-1.79894	0.00336849	0.231519	0.223866	426	tags=75%, list=25%, signal=57%	P50148/P50990/P49368/P67870/P17987/P68400/P19784/P48643/P50991/P62873/P40227/P29992
M10598	GOBP_INTRACELLULAR_PROTEIN_TRANSPORT	154	-0.350629	-1.49508	0.00337691	0.231519	0.223866	359	tags=29%, list=21%, signal=25%	P61020/O60684/Q00610/P11142/O00159/P30419/Q9H444/Q13263/P46459/P29590/Q13637/P60033/P12644/O00203/P09496/P27797/P27348/P60953/Q86Y82/P19784/P18085/Q15436/Q16543/P04792/P62745/P56377/P61106/Q12846/Q9H0U4/P53621/Q9BVK6/P01137/Q8TCT9/P62820/O14964/Q5JRX3/Q15041/P51572/Q99623/P53801/P09497/P51148/Q14699/Q15005
M16479	FLOTHO_PEDIATRIC_ALL_THERAPY_RESPONSE_UP	26	-0.590096	-1.77415	0.0033856	0.231519	0.223866	286	tags=35%, list=17%, signal=29%	O15371/P46777/Q9Y262/P60866/P61106/P62820/Q15836/Q96QD8/Q16563
M16144	GOBP_POSITIVE_REGULATION_OF_CELL_SUBSTRATE_ADHESION	40	-0.508338	-1.71064	0.00351416	0.23637	0.228557	308	tags=38%, list=18%, signal=32%	P02647/Q13464/P48059/P27797/P60953/Q13418/P36404/P63000/P07237/O43854/O15144/P08648/P60903/P27658/P55290
M12495	GOBP_POSITIVE_REGULATION_OF_MOLECULAR_FUNCTION	207	-0.325358	-1.44757	0.00381466	0.245814	0.237688	315	tags=29%, list=18%, signal=26%	Q14258/P17987/P00441/P78417/P02647/O43150/Q13263/Q13155/P07305/P29590/Q13464/P48059/O15371/P60033/P12644/Q9NUM4/Q15185/P60228/O60832/P04899/O75832/P58546/P61978/P62937/P60953/P05556/P18085/Q8IUD2/P50991/Q13547/Q03135/P09493/Q8IZP0/P29466/Q12846/P07737/P61769/P35232/P05106/P54709/Q92542/P01137/P29508/P07602/P07996/P60903/O00501/P07355/P28799/P67775/P62834/P50591/P12429/Q03405/P51572/Q99623/P20827/…
M11372	GOBP_ORGANOPHOSPHATE_METABOLIC_PROCESS	127	0.371699	1.52776	0.00388557	0.245814	0.237688	372	tags=35%, list=21%, signal=30%	P27708/P55263/P17405/Q8WTV0/Q14457/Q9Y5X9/P53602/P48163/P22392/P09972/P37268/P09874/Q9NRY6/P17858/Q01433/P00338/Q08043/O15269/P09622/P43490/P06858/Q15046/Q06203/P00492/P23921/P00813/Q9C0I1/P38606/P01130/O00154/P29401/Q8N142/P31939/Q01813/Q9NVE7/P06744/P36871/P30520/O00408/P49915/P04075/Q14117/O75874/P11586/P40261
M6709	GOBP_CELL_ACTIVATION	133	-0.359455	-1.50538	0.00393746	0.245814	0.237688	282	tags=27%, list=16%, signal=25%	P60033/P12644/P12268/O00203/O75923/P62937/P05556/P17931/P48509/Q03135/P49747/P04792/Q10589/Q9BV40/Q13418/Q12846/P61769/Q99584/P35232/P05106/Q92542/P01137/P68871/O00161/P07996/Q10588/P28799/P16070/P04083/P12429/Q99623/Q5ZPR3/Q15836/P21291/Q08722/P21926
M43011	GOBP_POSITIVE_REGULATION_OF_MITOTIC_CELL_CYCLE_PHASE_TRANSITION	12	-0.715172	-1.79428	0.00395282	0.245814	0.237688	159	tags=33%, list=9%, signal=30%	Q9UHI8/P04083/Q99623/Q04637
M1613	MILI_PSEUDOPODIA_CHEMOTAXIS_DN	127	-0.370779	-1.5447	0.00395411	0.245814	0.237688	366	tags=31%, list=21%, signal=26%	P07858/Q9GZX9/P30101/P20908/P61020/Q9NZH0/P49746/P04843/P05023/P11142/O15031/P23246/P10253/P00441/Q9P2T1/O15460/O15118/P02462/P00736/P05556/P15151/O43149/P62873/P54578/Q32P28/P35221/Q14697/Q15084/P08648/P07602/P07996/P28799/Q9BTV4/P51572/Q99623/Q96QD8/O43934/P21926/Q9BVC6
M10829	GOBP_ALPHA_AMINO_ACID_METABOLIC_PROCESS	34	0.551862	1.80449	0.00403687	0.247213	0.239041	433	tags=41%, list=25%, signal=31%	O00469/P27708/Q93088/P48506/P31937/Q00266/P23634/Q06203/P17174/P30520/P49915/P11586/P04424/Q16762
M15881	GOBP_INTEGRIN_MEDIATED_SIGNALING_PATHWAY	34	-0.540572	-1.76894	0.00468475	0.282669	0.273325	308	tags=41%, list=18%, signal=35%	P02647/P48059/P60953/P05556/P08631/Q9UHI8/Q13418/P35221/P05106/P08648/Q10588/P06756/P08962/Q08722
M16329	GOBP_INORGANIC_ION_TRANSMEMBRANE_TRANSPORT	60	-0.444266	-1.62332	0.00479948	0.283807	0.274425	309	tags=37%, list=18%, signal=31%	P78417/Q16864/O75947/P21283/O95747/P51798/P61421/P05556/P36543/Q03135/P21796/P54709/P16615/P08133/P06756/Q8N668/P07355/P35670/P08962/P56385/Q99623/Q9UHG3
M4850	GOBP_REGULATION_OF_IMMUNE_EFFECTOR_PROCESS	44	-0.486958	-1.67166	0.00484194	0.283807	0.274425	215	tags=41%, list=12%, signal=37%	P11279/P02647/P60033/P15151/P17931/Q10589/Q9BV40/Q92499/Q12846/P61769/P35232/P01137/P28799/P13987/P04083/Q99623/Q15836/Q08722
M11377	GOBP_CELLULAR_AMINO_ACID_BIOSYNTHETIC_PROCESS	16	0.640365	1.71632	0.00511475	0.295575	0.285804	241	tags=31%, list=14%, signal=27%	O00469/P27708/Q93088/P23634/P17174
M11547	GOBP_POSITIVE_REGULATION_OF_ORGANELLE_ORGANIZATION	91	-0.390618	-1.52864	0.00526249	0.298763	0.288887	472	tags=48%, list=27%, signal=37%	Q04837/P22626/P60981/P06396/P12270/P50990/Q14103/Q96QK1/O75367/P09651/P49368/P36405/P50552/O75116/P30419/P23246/P17987/P02647/Q13263/P29590/O60832/P60953/Q14204/P48643/P08631/P50991/P09493/Q16658/P40227/Q6DD88/Q9Y2A7/P21796/P36404/P07737/Q9BVK6/P63000/O15144/P60903/P07355/P28799/P04083/P50591/Q03405/Q08722
M27958	REACTOME_AMYLOID_FIBER_FORMATION	26	-0.570647	-1.71568	0.00539168	0.298763	0.288887	338	tags=46%, list=20%, signal=38%	Q93008/P04908/P02647/Q15582/P0C0S5/Q16777/P61769/Q92542/Q8N257/P61626/P16104/Q8NG11
M13415	GOBP_BLOOD_VESSEL_MORPHOGENESIS	134	-0.354664	-1.48709	0.00559835	0.298763	0.288887	298	tags=26%, list=17%, signal=23%	P29590/Q13464/P02462/P12644/O15123/P60953/Q15582/P05556/Q969H8/Q03135/Q9BXJ9/P49747/P04792/P62745/Q9UHI8/P05106/P01137/P17813/P08648/P07996/O14964/P31151/Q19T08/P06756/O00501/P07355/P28799/Q12904/P62834/P04083/P12429/P27658/Q6UXH8/P20827/P55290
M53	PID_INTEGRIN3_PATHWAY	25	-0.571722	-1.70403	0.00564881	0.298763	0.288887	279	tags=36%, list=16%, signal=31%	P02462/Q15582/P15151/P05106/O43854/P07996/P06756/Q03405/Q08722
M11689	GOBP_ORGANIC_ACID_BIOSYNTHETIC_PROCESS	39	0.512213	1.72486	0.00565006	0.298763	0.288887	263	tags=33%, list=15%, signal=29%	O00469/P27708/Q15493/Q9H4L5/Q9Y5X9/P47895/Q93088/P16152/P23634/P09960/P06858/P17174/O00154
M1951	MEISSNER_NPC_HCP_WITH_H3K4ME2	36	-0.511976	-1.68078	0.00567172	0.298763	0.288887	332	tags=39%, list=19%, signal=32%	O00159/P39060/P07305/O75923/Q99715/P09493/P49747/O00151/P05106/P07355/Q8TDI0/P31949/P21291/Q14699
M39432	WP_TGFBETA_SIGNALING_PATHWAY	27	-0.564542	-1.71848	0.00568914	0.298763	0.288887	298	tags=44%, list=17%, signal=37%	P29590/Q13464/P60953/P05556/Q13547/Q03135/P63000/P05106/P01137/P07996/O14964/Q92905
M39577	WP_INTEGRINMEDIATED_CELL_ADHESION	26	-0.567967	-1.70762	0.00576351	0.298763	0.288887	379	tags=50%, list=22%, signal=40%	Q02750/P50552/O75116/Q13464/P60953/P05556/Q03135/Q13418/P63000/P05106/P08648/P06756/P62834
M27191	REACTOME_DNA_DAMAGE_TELOMERE_STRESS_INDUCED_SENESCENCE	16	-0.650066	-1.75309	0.00589196	0.298763	0.288887	376	tags=62%, list=22%, signal=49%	P16402/P04908/P07305/P16401/P10412/P0C0S5/P16403/Q16777/Q8N257/P16104
M13449	CAIRO_HEPATOBLASTOMA_DN	31	0.540109	1.73528	0.00610117	0.298763	0.288887	241	tags=32%, list=14%, signal=28%	Q04756/P55263/Q9BY76/Q14624/P05121/O95497/Q00266/P50452/P43490/P17174
M13633	GOBP_REGULATION_OF_CELL_DIVISION	16	0.627942	1.68302	0.00616008	0.298763	0.288887	200	tags=31%, list=12%, signal=28%	Q16513/P01344/Q14457/P63244/P21741
M16560	GOBP_PLATELET_AGGREGATION	24	-0.581912	-1.72381	0.00627269	0.298763	0.288887	234	tags=33%, list=14%, signal=29%	P62937/P49747/P04792/Q13418/P05106/P68871/P21291/P21926
M10943	GOBP_ESTABLISHMENT_OF_PROTEIN_LOCALIZATION_TO_CHROMOSOME	12	-0.69608	-1.74639	0.0063031	0.298763	0.288887	426	tags=75%, list=25%, signal=57%	P50990/O75367/P49368/P17987/O60832/P16401/P48643/P50991/P40227
M27101	REACTOME_FORMATION_OF_THE_BETA_CATENIN_TCF_TRANSACTIVATING_COMPLEX	12	-0.695193	-1.74416	0.0063031	0.298763	0.288887	328	tags=58%, list=19%, signal=48%	P04908/Q9Y265/Q13547/P0C0S5/Q16777/Q8N257/P16104
M15146	GOBP_MEMBRANE_ORGANIZATION	121	-0.361197	-1.49323	0.00631457	0.298763	0.288887	336	tags=31%, list=19%, signal=26%	P11142/P30419/Q9NVJ2/P00441/P02647/Q9H444/P46459/O15118/Q92556/O00203/O75923/P60953/Q86Y82/O75531/Q03135/Q15436/Q9BV40/O75396/Q12846/Q9BVK6/P63000/P16615/P08133/O00161/P62820/P07996/O14964/P60903/P07355/P04083/Q9BTV4/Q15041/P45880/P51153/Q15836/P21926/Q14699
M15299	GOBP_RETINA_HOMEOSTASIS	15	0.67599	1.78515	0.00633496	0.298763	0.288887	69	tags=33%, list=4%, signal=32%	Q96DA0/P01833/P02787/P31025/P02788
M13097	GOBP_PROTEIN_STABILIZATION	50	-0.466967	-1.6458	0.00644576	0.300533	0.290599	356	tags=46%, list=21%, signal=38%	P49368/Q93008/P11279/P17987/P02647/P23284/P46777/Q15185/P27797/P16401/Q86Y82/P48643/P50991/Q9BXJ9/Q16543/P40227/Q32P28/P07737/P35232/P54709/P28799/Q99623/P20827
M27872	REACTOME_RAB_REGULATION_OF_TRAFFICKING	20	-0.59407	-1.68691	0.00679101	0.308143	0.297957	290	tags=50%, list=17%, signal=42%	P61020/Q13637/P50395/Q15286/P61106/Q9H0U4/P62820/P61026/P51153/P51148
M10857	GOBP_PLATELET_ACTIVATION	29	-0.535841	-1.66414	0.00685415	0.308143	0.297957	234	tags=28%, list=14%, signal=24%	P62937/P49747/P04792/Q13418/P05106/P68871/P21291/P21926
M5517	GOBP_REGULATION_OF_ORGANELLE_ORGANIZATION	199	-0.32415	-1.4335	0.00698142	0.308143	0.297957	472	tags=40%, list=27%, signal=33%	Q04837/Q6NY19/P05109/P62328/P22626/P60981/P06396/P12270/Q15555/P50990/P20339/Q14103/Q96QK1/P02786/O75367/Q9Y5K6/Q02750/P09651/P49368/P36405/P50552/O75116/Q00610/P30419/Q32P44/Q9Y265/P23246/P17987/P02647/Q9H444/Q13263/P29590/Q13464/P12644/Q9NUM4/P50395/O43684/P26232/Q13045/O60832/P27797/O75832/P58546/P60953/P19784/Q14204/P48643/P08631/Q99536/P50991/P09493/Q16658/Q96AP7/P40227/P62745/Q10589/Q6DD88/…
M1275	SHETH_LIVER_CANCER_VS_TXNIP_LOSS_PAM2	29	-0.534211	-1.65908	0.00700562	0.308143	0.297957	190	tags=31%, list=11%, signal=28%	P09493/Q16658/P16403/P63167/Q9Y5Y7/P07355/Q9H1C7/P31949/Q5ZPR3
M13859	BASSO_HAIRY_CELL_LEUKEMIA_UP	22	-0.587563	-1.7193	0.00700968	0.308143	0.297957	125	tags=45%, list=7%, signal=43%	P61769/Q99584/P17813/P68871/P07996/P04083/P08962/P51153/Q15836/P53801
M38970	JINESH_BLEBBISHIELD_TO_IMMUNE_CELL_FUSION_PBSHMS_DN	49	0.471899	1.63879	0.00705959	0.308143	0.297957	195	tags=24%, list=11%, signal=22%	Q96DA0/P01833/P13646/P02792/P09972/Q01628/Q08257/Q9Y316/P50452/P42224/Q14254/P01024
M2493	PEDRIOLI_MIR31_TARGETS_UP	24	0.591305	1.78898	0.00716691	0.309535	0.299303	242	tags=38%, list=14%, signal=33%	Q86SQ4/Q9BY76/Q9BY67/Q9NRN5/Q6KB66/Q14533/P23634/Q06203/Q01995
M16758	GOBP_STEROID_METABOLIC_PROCESS	38	0.50827	1.71461	0.00724289	0.309558	0.299325	100	tags=21%, list=6%, signal=20%	P17405/Q9H4L5/Q13510/Q8WTV0/Q9UNE7/P02771/P53602/P37268
M2398	SERVITJA_LIVER_HNF1A_TARGETS_DN	16	0.618493	1.6577	0.00757875	0.31208	0.301764	179	tags=31%, list=10%, signal=28%	P01833/P01009/P05156/P41091/P01031
M18329	GOBP_TUBE_MORPHOGENESIS	159	-0.326847	-1.39964	0.00758597	0.31208	0.301764	392	tags=33%, list=23%, signal=28%	Q16394/P08572/P17948/P21980/O75340/P19174/O00592/P43121/P67870/P50552/O75116/O15031/P39060/P29590/Q13464/P02462/P12644/O15123/P60953/Q15582/P05556/Q969H8/Q03135/Q9BXJ9/P49747/P04792/P62745/Q9UHI8/Q13418/P07737/P05106/P01137/P17813/P08648/P07996/O14964/P31151/Q19T08/P06756/O00501/P07355/P09758/P28799/Q12904/P62834/P04083/P12429/P27658/Q6UXH8/Q99623/P20827/P55290
M39719	WP_FOCAL_ADHESION_PI3KAKTMTORSIGNALING_PATHWAY	63	-0.421548	-1.55574	0.00759406	0.31208	0.301764	462	tags=38%, list=27%, signal=29%	P61019/P04275/P62753/P07942/P08572/P17948/Q02750/P20908/P49746/P02462/O15123/P05556/Q15172/P62873/P49747/Q16543/P61106/P05106/P08648/P07996/P06756/P61026/P67775/P20827
M777	REACTOME_METABOLISM_OF_NUCLEOTIDES	30	0.540349	1.70706	0.00760614	0.31208	0.301764	356	tags=43%, list=21%, signal=35%	P27708/P55263/P22392/Q01433/Q06203/P00492/P23921/P00813/Q8N142/P31939/P30520/P49915/Q14117
M607	REACTOME_PRE_NOTCH_EXPRESSION_AND_PROCESSING	12	-0.688415	-1.72716	0.00780154	0.31534	0.304916	188	tags=50%, list=11%, signal=45%	P04908/P0C0S5/Q16777/P16615/Q8N257/P16104
M1641	BURTON_ADIPOGENESIS_PEAK_AT_8HR	15	-0.672242	-1.75532	0.0078393	0.31534	0.304916	152	tags=40%, list=9%, signal=37%	P78417/P11387/P30041/P08648/P16070/P62070
M14180	GOBP_NUCLEOSIDE_MONOPHOSPHATE_BIOSYNTHETIC_PROCESS	17	0.643047	1.75105	0.00817903	0.325811	0.315041	334	tags=59%, list=19%, signal=48%	P27708/P55263/Q01433/Q06203/P00492/P00813/Q8N142/P31939/P30520/P49915
M7145	GOBP_ENDOTHELIAL_CELL_MIGRATION	64	-0.438539	-1.6296	0.00836117	0.329864	0.31896	382	tags=36%, list=22%, signal=29%	O75340/P19174/P67870/O75116/P02647/P12644/O15123/O00214/P27797/P05556/P04792/P62745/P63000/P05106/P01137/P07996/P28799/P04083/P12429/Q6UXH8/P51153/P20827/P55290
M15452	GOBP_MONOSACCHARIDE_METABOLIC_PROCESS	44	0.473799	1.61927	0.00898884	0.348732	0.337204	421	tags=43%, list=24%, signal=34%	P62136/Q15493/P01344/P09972/P48506/Q9NTJ4/P17858/Q08043/P07902/Q93009/Q01813/P06744/P36871/P04075/P40261/Q01469/Q16531/O00754/P16278
M38993	MEBARKI_HCC_PROGENITOR_FZD8CRD_DN	32	0.513164	1.64681	0.00903355	0.348732	0.337204	326	tags=41%, list=19%, signal=34%	Q15493/P01009/Q14624/Q9BQT9/P00742/P05156/P12259/P0C0L4/P43490/Q9BZP6/P36955/Q7Z7M0/P03952
M567	REACTOME_SRP_DEPENDENT_COTRANSLATIONAL_PROTEIN_TARGETING_TO_MEMBRANE	85	-0.382563	-1.4877	0.0090944	0.348732	0.337204	640	tags=55%, list=37%, signal=37%	P36578/P42677/P27635/P63173/P25398/P62266/P61254/P83731/P39019/P46783/P62979/P40429/P61513/P61247/P50914/P62277/P46776/P32969/Q969Q0/Q9UNX3/P51571/P62244/P46782/P62753/P05387/P62857/P62851/P62750/P62424/P08708/P46778/P04843/P62906/P49207/P46777/P61927/P62841/P26373/P08865/P60866/Q02543/P47914/P62273/P62917/P18077/P22090/Q15005
M13504	GOBP_CARBOHYDRATE_METABOLIC_PROCESS	100	0.381146	1.50665	0.0092166	0.348826	0.337295	635	tags=59%, list=37%, signal=40%	P62136/Q15493/P01344/P48163/P09972/P48506/Q9NTJ4/P17858/P06280/P00338/Q9NR45/P30837/Q08043/P07195/P36873/P07902/P17174/P46926/Q9BZP6/Q93009/O75390/Q01813/Q8TDQ7/P06744/P36871/Q9UJ70/O43286/P04075/O75874/P40261/P40926/P11216/Q01469/Q16531/O00754/P16278/O00462/P40189/P05090/P35573/P06865/Q16851/Q9BTY2/P04406/P06737/Q9UK23/Q9NPG4/P62140/Q99519/Q96G03/Q00796/Q04446/P11217/P40925/P50213/P56537/P14618/…
M12762	GOBP_MYELOID_LEUKOCYTE_ACTIVATION	28	-0.533756	-1.65465	0.00926689	0.348826	0.337295	167	tags=32%, list=10%, signal=30%	Q9BV40/Q12846/Q99584/O00161/P07996/P28799/P04083/P12429/Q15836
M14205	GOBP_MYELOID_LEUKOCYTE_MEDIATED_IMMUNITY	16	-0.633142	-1.70746	0.00948843	0.351084	0.339479	167	tags=44%, list=10%, signal=40%	Q9BV40/Q92499/Q12846/Q99584/O00161/P12429/Q15836
M210	PID_IL8_CXCR2_PATHWAY	10	-0.731725	-1.74934	0.00949802	0.351084	0.339479	423	tags=70%, list=24%, signal=53%	P20339/P50552/Q92556/P04899/P08631/P62873/P67775
M40427	GOBP_POSITIVE_REGULATION_OF_LOCOMOTION	120	-0.358993	-1.47984	0.00959716	0.351582	0.339959	249	tags=24%, list=14%, signal=22%	P04899/P27797/O95747/P05556/P17931/P48509/Q03135/P04792/P62745/Q9UHI8/Q12846/P07737/P63000/P05106/P01137/P29508/P08648/P07996/P31151/Q9Y5Y7/P06756/P28799/P04083/P12429/Q6UXH8/P31949/Q08722/P55290/P62070
M2396	SERVITJA_ISLET_HNF1A_TARGETS_DN	16	0.611224	1.63821	0.0098298	0.354604	0.342882	152	tags=25%, list=9%, signal=23%	P01833/Q04756/P07954/P17858
M42515	SATOH_COLORECTAL_CANCER_MYC_UP	24	0.580132	1.75517	0.00987122	0.354604	0.342882	433	tags=54%, list=25%, signal=41%	P27708/Q01433/P30837/P07195/Q06203/P00492/P23921/P46926/P31939/P06744/P49915/P23526/Q16762
M14071	GOBP_CELLULAR_RESPONSE_TO_IONIZING_RADIATION	11	-0.70287	-1.72457	0.00993893	0.354604	0.342882	170	tags=27%, list=10%, signal=25%	P62745/P16104/Q9BVC6
M13422	HUPER_BREAST_BASAL_VS_LUMINAL_UP	16	0.610324	1.6358	0.0101299	0.35783	0.346002	424	tags=69%, list=24%, signal=52%	Q14574/Q02413/Q15063/P47929/P17302/P08779/P01040/Q03001/Q01469/Q92743/P02538
M13894	GOBP_SUBSTRATE_ADHESION_DEPENDENT_CELL_SPREADING	41	-0.485381	-1.64471	0.0102038	0.35783	0.346002	308	tags=37%, list=18%, signal=31%	P02647/P48059/P27797/P60953/Q13418/P63000/P05106/P07237/O15144/P62820/P60903/P06756/P09758/P20827/Q15836
M189	KEGG_RIBOSOME	77	-0.398288	-1.52236	0.0103216	0.358895	0.347032	651	tags=58%, list=38%, signal=38%	P30050/P36578/P42677/P27635/P63173/P25398/P62266/P61254/P83731/P39019/P46783/P62979/P40429/P61513/P61247/P50914/P62277/P46776/P32969/Q969Q0/Q9UNX3/P62244/P46782/P62753/P05387/P62857/P62851/P62750/P62424/P08708/P46778/P62906/P49207/P46777/P61927/P62841/P26373/P08865/P60866/Q02543/P47914/P62273/P62917/P18077/P22090
M14273	GOBP_REGULATION_OF_CELL_SUBSTRATE_ADHESION	62	-0.427824	-1.56883	0.0106011	0.362484	0.350501	308	tags=31%, list=18%, signal=26%	P02647/Q13464/P48059/O15123/P27797/P60953/Q13418/P36404/P63000/P07237/O43854/O15144/P08648/P07996/P60903/Q10588/P09758/P27658/P55290
M22941	GOBP_POSITIVE_REGULATION_OF_SIGNALING	217	-0.307769	-1.37152	0.0106015	0.362484	0.350501	364	tags=29%, list=21%, signal=26%	Q9GZX9/P30101/Q9NZH0/P67870/O75116/O00159/Q9Y265/P23246/Q14258/P00441/P02647/P46459/P29590/Q13464/P48059/P68400/P60033/P12644/P04899/P27797/P61927/P62937/P60953/P62841/P05556/Q9Y6Y9/Q969H8/Q03135/P60866/Q10589/Q9BV40/Q92499/P29466/Q13418/P35221/Q12846/Q99584/P35232/P63000/P05106/Q92542/P01137/Q8IWU5/P17813/P08648/P07996/P31151/P06756/P07355/P16070/Q12904/P62834/P50591/P08962/Q03405/Q6UXH8/P51572/…
M42693	GOBP_RIBOSE_PHOSPHATE_METABOLIC_PROCESS	78	0.405912	1.53969	0.0107471	0.364424	0.352377	356	tags=36%, list=21%, signal=30%	P27708/P55263/P53602/P22392/P09972/P09874/P17858/Q01433/P00338/Q08043/P09622/Q06203/P00492/P00813/P38606/O00154/P29401/Q8N142/P31939/Q01813/Q9NVE7/P06744/P36871/P30520/O00408/P49915/P04075/Q14117
M13556	GOBP_ORGANIC_ANION_TRANSPORT	16	-0.62401	-1.68283	0.0109595	0.364948	0.352884	85	tags=44%, list=5%, signal=42%	Q15758/P05556/P07602/P04083/Q15041/Q96QD8/Q08722
M12930	GOBP_IMMUNOGLOBULIN_PRODUCTION	12	-0.675993	-1.69599	0.0110939	0.364948	0.352884	133	tags=50%, list=8%, signal=46%	Q12846/P61769/P35232/P01137/Q99623/Q15836
M27779	REACTOME_RAB_GEFS_EXCHANGE_GTP_FOR_GDP_ON_RABS	17	-0.616284	-1.67789	0.0111066	0.364948	0.352884	290	tags=65%, list=17%, signal=54%	P20339/P61020/Q13637/P50395/Q15286/P61106/Q9H0U4/P62820/P61026/P51153/P51148
M1593	MULLIGAN_NTF3_SIGNALING_VIA_INSR_AND_IGF1R_UP	10	0.736698	1.75759	0.011252	0.364948	0.352884	14	tags=20%, list=1%, signal=20%	Q9Y5P6/Q9BQA1
M39729	WP_VEGFAVEGFR2_SIGNALING_PATHWAY	160	-0.326222	-1.3983	0.0112758	0.364948	0.352884	394	tags=31%, list=23%, signal=26%	P02679/Q14694/P17948/Q02750/P78344/P19174/O75116/Q00610/O00159/O15372/P48735/P62906/O15460/Q13464/O15371/P46777/Q9BQE3/Q13045/P27797/P61421/P60953/P05556/Q01844/P36543/P18085/Q13547/Q03135/Q16658/Q02543/P04792/Q9UHI8/Q16270/P35221/P07737/Q9BPX5/P63000/P05106/P07237/P30041/P17813/Q15084/O14964/P06756/P67775/P62834/P04083/Q03405/P21291/Q04637
M12499	GOBP_SPROUTING_ANGIOGENESIS	28	-0.526972	-1.63362	0.0115271	0.364948	0.352884	278	tags=32%, list=16%, signal=27%	P12644/P60953/P05556/P17813/P08648/P07996/P04083/Q6UXH8/P55290
M9118	IWANAGA_CARCINOGENESIS_BY_KRAS_UP	24	0.573219	1.73426	0.0116261	0.364948	0.352884	260	tags=38%, list=15%, signal=32%	P55263/Q9P0K7/P48163/P17302/P00338/O43493/Q9BZP6/Q9UBR2/P01130
M15592	NGUYEN_NOTCH1_TARGETS_UP	12	-0.673611	-1.69001	0.0116664	0.364948	0.352884	402	tags=75%, list=23%, signal=58%	O75915/P39060/P23246/Q13547/Q99584/P08133/P06756/P27824/Q99623
M15809	GOBP_CELL_MATRIX_ADHESION	61	-0.412826	-1.51685	0.0116777	0.364948	0.352884	147	tags=21%, list=8%, signal=20%	Q13418/P63000/P05106/P08648/P07996/P60903/Q10588/Q9Y5Y7/P06756/P16070/P08962/Q14112/P55290
M11875	GOBP_MEMBRANE_DOCKING	19	-0.612666	-1.72078	0.0117182	0.364948	0.352884	292	tags=42%, list=17%, signal=35%	Q13464/Q86Y82/Q9BV40/Q12846/P16615/P61026/P51153/Q15836
M39495	WP_CYTOPLASMIC_RIBOSOMAL_PROTEINS	75	-0.395547	-1.50371	0.011741	0.364948	0.352884	651	tags=57%, list=38%, signal=37%	P30050/P36578/P42677/P27635/P63173/P25398/P62266/P61254/P83731/P39019/P46783/P62979/P40429/P61513/P61247/P50914/P62277/P46776/P32969/P62244/P46782/P62753/P05387/P62857/P62851/P62750/P62424/P08708/P46778/P62906/P49207/P46777/P61927/P62841/P26373/P08865/P60866/Q02543/P47914/P62273/P62917/P18077/P22090
M2293	PASINI_SUZ12_TARGETS_DN	94	-0.358835	-1.41199	0.0118314	0.364995	0.35293	255	tags=23%, list=15%, signal=21%	Q32MZ4/P58546/P05556/P48509/Q99536/Q03135/P09493/P62745/Q99439/Q13418/P61769/P07996/P60903/P06756/P08758/P07355/P04083/P12429/Q9BTV4/Q5ZPR3/P21291/P62070
M1851	QI_PLASMACYTOMA_UP	41	-0.480474	-1.62808	0.0121124	0.370874	0.358614	402	tags=41%, list=23%, signal=33%	O75915/P21980/P28065/P50552/Q32MZ4/P58546/P05556/P08631/Q16658/Q99439/P29466/P07737/Q99584/P05106/P01137/Q08722/P62070
M14217	GOBP_REGULATION_OF_PROTEIN_LOCALIZATION_TO_CHROMOSOME_TELOMERIC_REGION	10	-0.724681	-1.7325	0.0123122	0.3742	0.36183	426	tags=80%, list=25%, signal=61%	P50990/O75367/P49368/P17987/O60832/P48643/P50991/P40227
M42596	GOBP_MYELOID_CELL_ACTIVATION_INVOLVED_IN_IMMUNE_RESPONSE	11	-0.690858	-1.6951	0.0124765	0.376405	0.363962	262	tags=73%, list=15%, signal=62%	O75923/Q9BV40/Q12846/Q99584/O00161/P28799/P12429/Q15836
M6175	CAIRO_LIVER_DEVELOPMENT_DN	55	0.440931	1.56785	0.0126962	0.378045	0.365548	381	tags=40%, list=22%, signal=32%	Q04756/Q16513/P01009/Q14624/P08697/P02788/Q93088/P00742/P05546/P30837/P01031/Q07954/P01024/Q9Y646/P36955/P36871/P13804/P03952/P19827/Q14117/Q06033/P01023
M14602	GOBP_DETECTION_OF_STIMULUS	20	0.592544	1.70173	0.0128006	0.378045	0.365548	194	tags=30%, list=11%, signal=27%	P01833/Q8WTV0/Q9BY67/P61073/P0C0L4/P78539
M24721	GOBP_TELOMERASE_RNA_LOCALIZATION	11	-0.689402	-1.69152	0.0128994	0.378045	0.365548	426	tags=73%, list=25%, signal=55%	P50990/P49368/Q9Y265/P17987/O60832/P48643/P50991/P40227
M25296	GOBP_POSITIVE_REGULATION_OF_TELOMERASE_RNA_LOCALIZATION_TO_CAJAL_BODY	11	-0.689402	-1.69152	0.0128994	0.378045	0.365548	426	tags=73%, list=25%, signal=55%	P50990/P49368/Q9Y265/P17987/O60832/P48643/P50991/P40227
M518	REACTOME_ANTIGEN_PROCESSING_CROSS_PRESENTATION	60	-0.417434	-1.52528	0.0131402	0.380396	0.367822	428	tags=38%, list=25%, signal=30%	Q9UBG0/P28072/Q13200/P02679/P62191/P62195/P28065/P30101/P27797/O75832/Q9Y6Y9/Q9UIQ6/Q16401/Q9BV40/O75396/Q99460/Q12846/P61769/O00161/P48556/P06756/O00232/Q15836
M11818	GOBP_CARBOHYDRATE_DERIVATIVE_METABOLIC_PROCESS	157	0.333186	1.42417	0.0131651	0.380396	0.367822	356	tags=30%, list=21%, signal=26%	O00469/P27708/Q9Y5P6/P55263/P17405/Q14624/P53602/P22392/P09972/P09874/P17858/Q01433/P06280/P00338/Q9NR45/Q08043/P09622/P07902/Q06203/P54803/P00492/P23921/P00813/P46926/Q9BZP6/P38606/O00154/P21810/P29401/Q8N142/P31939/Q01813/Q8TDQ7/Q9NVE7/P06744/P36871/Q9UJ70/P30520/O43286/P01034/O00408/P49915/P19827/P04075/P02458/P04062/Q14117
M39649	WP_COMPLEMENT_AND_COAGULATION_CASCADES	23	0.58169	1.74351	0.0134479	0.385852	0.373097	195	tags=43%, list=11%, signal=39%	P01009/P08697/P05121/P00742/P05156/P00750/P05546/P12259/P0C0L4/P01024
M2073	BAE_BRCA1_TARGETS_DN	12	0.693012	1.72875	0.0136672	0.389204	0.376339	8	tags=17%, list=0%, signal=17%	P27708/Q16513
M14743	GOBP_POSITIVE_REGULATION_OF_PRODUCTION_OF_MOLECULAR_MEDIATOR_OF_IMMUNE_RESPONSE	16	-0.609522	-1.64376	0.0137545	0.389204	0.376339	165	tags=62%, list=10%, signal=57%	P02786/Q9NZH0/P60033/Q92499/Q12846/P61769/P35232/P01137/Q99623/Q15836
M10973	MATTIOLI_MGUS_VS_PCL	40	0.47801	1.60761	0.0138817	0.390114	0.377218	259	tags=38%, list=15%, signal=33%	P27708/Q99426/O75131/Q13838/P62318/P30048/P52597/P09874/Q13283/P69905/P07437/P25788/P49321/Q9Y646/P12004
M27077	REACTOME_SIGNALING_BY_VEGF	29	-0.517633	-1.60759	0.0140804	0.393007	0.380015	387	tags=48%, list=22%, signal=38%	P17948/P19174/O75116/Q13464/Q92556/P60953/Q03135/P04792/Q8IZP0/Q9Y2A7/P35221/P63000/P05106/P06756
M24798	GOBP_CATION_TRANSMEMBRANE_TRANSPORT	63	-0.401362	-1.48124	0.0142105	0.393958	0.380935	309	tags=33%, list=18%, signal=28%	P78417/Q16864/O75947/Q15758/P21283/O95747/P61421/P05556/P36543/Q03135/P21796/P54709/P16615/P08133/P06756/Q8N668/P07355/P35670/P08962/P56385/Q99623
M1561	LINDVALL_IMMORTALIZED_BY_TERT_DN	17	0.618547	1.68433	0.014482	0.396235	0.383137	372	tags=41%, list=21%, signal=33%	O00469/Q02952/Q9NR50/P13611/Q08380/Q13308/P40261
M15049	GOBP_INTRINSIC_APOPTOTIC_SIGNALING_PATHWAY_BY_P53_CLASS_MEDIATOR	13	-0.661177	-1.69375	0.0145293	0.396235	0.383137	298	tags=38%, list=17%, signal=32%	P29590/P61978/P16070/P53801/Q9BVC6
M72	PID_NECTIN_PATHWAY	13	-0.655844	-1.68009	0.014817	0.396235	0.383137	229	tags=54%, list=13%, signal=47%	P60953/P15151/P35221/P63000/P05106/P06756/P62834
M19693	DAZARD_RESPONSE_TO_UV_NHEK_UP	59	-0.412207	-1.50253	0.0148415	0.396235	0.383137	238	tags=25%, list=14%, signal=23%	P61927/P08865/Q9UKM9/P63167/Q16777/P07737/P01137/P48556/P07355/P09758/P62834/P56385/P16104/P21291/P09497
M16237	GOBP_PRODUCTION_OF_MOLECULAR_MEDIATOR_OF_IMMUNE_RESPONSE	24	-0.545312	-1.61539	0.0148721	0.396235	0.383137	416	tags=54%, list=24%, signal=42%	P02786/P78527/Q9NZH0/P02647/P60033/Q10589/Q92499/Q12846/P61769/P35232/P01137/Q99623/Q15836
M11395	GOBP_REGULATION_OF_INTRACELLULAR_SIGNAL_TRANSDUCTION	219	-0.299211	-1.33507	0.0148721	0.396235	0.383137	320	tags=26%, list=18%, signal=24%	P23246/Q14258/P00441/P02647/P29590/Q13464/P48059/Q92888/P60033/P46777/P12644/P09211/Q14137/P04899/P27797/O75832/P61978/P61927/Q9P0V3/P62937/P60953/P62841/P05556/Q969H8/Q13547/Q03135/P60866/P04792/Q10589/Q92499/P29466/Q13418/Q99584/P35232/P63000/P07237/P01137/P17813/P29508/P07996/Q10588/P31151/P06756/P16070/P67775/P62834/P50591/P45880/Q03405/P51572/Q99623/Q8TDI0/P20827/P53801/P55290/Q92905
M11251	GOBP_ORGANIC_HYDROXY_COMPOUND_METABOLIC_PROCESS	61	0.412608	1.49703	0.015167	0.401486	0.388214	260	tags=28%, list=15%, signal=25%	P17405/Q9H4L5/Q13510/Q8WTV0/P53602/P01266/P47895/P37268/P00338/P30837/Q08043/O15269/P07195/P00492/P17174/Q9Y646/P01130
M1484	IGLESIAS_E2F_TARGETS_UP	67	-0.389237	-1.45696	0.0152874	0.402078	0.388787	291	tags=30%, list=17%, signal=26%	P48059/P02462/P04899/P60953/P68363/P05556/P62873/P62745/P61769/Q99584/P12111/P60903/P61626/P07355/P12429/Q14112/P31949/P21291/Q08722/P21926
M7847	REACTOME_SIGNALING_BY_WNT	84	-0.381496	-1.48506	0.0155027	0.405144	0.391752	424	tags=36%, list=24%, signal=28%	P28072/Q13200/Q96QK1/P62191/P62195/P28065/P67870/Q00610/P04908/Q9Y265/P68400/P09496/O75832/P19784/Q15172/Q13547/P62873/Q03135/P0C0S5/Q16401/Q99460/Q16777/P07737/P63000/Q8N257/P48556/O00232/P67775/P16104/P09497
M14818	GOBP_IMMUNE_EFFECTOR_PROCESS	83	-0.38366	-1.49095	0.0161048	0.408925	0.395407	325	tags=31%, list=19%, signal=27%	Q9NVJ2/P11279/P02647/P60033/O75923/P00736/P15151/P17931/P08631/Q10589/Q9BV40/Q92499/Q12846/P61769/Q99584/P35232/P01137/O00161/P28799/P13987/P04083/P12429/Q99623/Q15836/Q08722/Q14699
M27099	REACTOME_TCF_DEPENDENT_SIGNALING_IN_RESPONSE_TO_WNT	65	-0.401839	-1.497	0.016114	0.408925	0.395407	424	tags=35%, list=24%, signal=28%	P28072/Q13200/P62191/P62195/P28065/P67870/P04908/Q9Y265/P68400/O75832/P19784/Q15172/Q13547/Q03135/P0C0S5/Q16401/Q99460/Q16777/Q8N257/P48556/O00232/P67775/P16104
M11431	GOBP_GLUTAMINE_FAMILY_AMINO_ACID_METABOLIC_PROCESS	17	0.607799	1.65507	0.0161372	0.408925	0.395407	403	tags=41%, list=23%, signal=32%	P27708/P48506/P23634/Q06203/P17174/P49915/P04424
M14504	GOBP_LIPID_BIOSYNTHETIC_PROCESS	59	0.430004	1.55418	0.0161857	0.408925	0.395407	263	tags=29%, list=15%, signal=25%	Q15493/P17405/Q9H4L5/Q13510/Q8WTV0/Q14457/Q9Y5X9/P53602/P47895/P37268/Q9NRY6/P16152/P01024/O15269/P06858/P01130/O00154
M16089	GOBP_NEGATIVE_REGULATION_OF_IMMUNE_EFFECTOR_PROCESS	18	-0.612377	-1.69554	0.0162809	0.408925	0.395407	208	tags=39%, list=12%, signal=35%	P17931/Q10589/P01137/P28799/P13987/P04083/Q08722
M27943	REACTOME_TRANSCRIPTIONAL_REGULATION_OF_GRANULOPOIESIS	11	-0.678079	-1.66374	0.0162926	0.408925	0.395407	328	tags=55%, list=19%, signal=44%	P04908/P29590/P0C0S5/Q16777/Q8N257/P16104
M11456	GOBP_NUCLEOSIDE_PHOSPHATE_BIOSYNTHETIC_PROCESS	52	0.434323	1.52597	0.016345	0.408925	0.395407	372	tags=44%, list=21%, signal=36%	P27708/P55263/P48163/P22392/P09874/Q01433/P09622/P43490/Q15046/Q06203/P00492/P23921/P00813/P38606/O00154/Q8N142/P31939/Q9NVE7/P30520/P49915/P04075/P11586/P40261
M10329	GOBP_NUCLEOSIDE_DIPHOSPHATE_METABOLIC_PROCESS	31	0.493718	1.58624	0.0168634	0.416607	0.402836	338	tags=35%, list=20%, signal=29%	P27708/P22392/P09972/P17858/P00338/Q08043/P23921/Q01813/P06744/P36871/P04075
M13856	GOBP_PROTEIN_FOLDING	65	-0.397765	-1.48183	0.0170009	0.416607	0.402836	363	tags=38%, list=21%, signal=32%	P30101/P49368/Q9H3U1/P11142/P17987/P68400/P23284/Q15185/O15212/P27797/P62937/P48643/P50991/O60884/Q16543/P04792/P40227/Q32P28/P36404/O95757/P61769/P07237/Q15084/P28799/P27824
M16638	GOBP_IRON_ION_HOMEOSTASIS	16	0.587517	1.57467	0.0170421	0.416607	0.402836	95	tags=38%, list=5%, signal=36%	P30519/P02787/P02792/P02794/P02788/P21399
M27792	REACTOME_RUNX1_REGULATES_GENES_INVOLVED_IN_MEGAKARYOCYTE_DIFFERENTIATION_AND_PLATELET_FUNCTION	12	-0.659372	-1.65429	0.0171186	0.416607	0.402836	195	tags=58%, list=11%, signal=52%	P04908/Q13547/P0C0S5/Q16777/Q8N257/P07996/P16104
M16947	GOBP_REGULATION_OF_PRODUCTION_OF_MOLECULAR_MEDIATOR_OF_IMMUNE_RESPONSE	21	-0.562748	-1.63143	0.0174344	0.416607	0.402836	358	tags=57%, list=21%, signal=46%	P02786/Q9NZH0/P02647/P60033/Q10589/Q92499/Q12846/P61769/P35232/P01137/Q99623/Q15836
M29813	REACTOME_RESPONSE_OF_EIF2AK4_GCN2_TO_AMINO_ACID_DEFICIENCY	81	-0.367873	-1.41543	0.0175371	0.416607	0.402836	640	tags=57%, list=37%, signal=38%	P30050/P36578/P42677/P27635/P63173/P25398/P62266/P61254/P83731/P39019/P46783/P62979/P40429/P61513/P61247/P50914/P62277/P46776/P32969/Q969Q0/Q9UNX3/P62244/P46782/P62753/P05387/P62857/P62851/P62750/P62424/P08708/P46778/P62906/P49207/P46777/P61927/P62841/P26373/P08865/P60866/Q02543/P47914/P62273/P62917/P20042/P18077/P22090
M1435	GALINDO_IMMUNE_RESPONSE_TO_ENTEROTOXIN	10	-0.703931	-1.6829	0.0176758	0.416607	0.402836	170	tags=40%, list=10%, signal=36%	P62745/P08648/P16070/Q03405
M29714	REACTOME_DEPOSITION_OF_NEW_CENPA_CONTAINING_NUCLEOSOMES_AT_THE_CENTROMERE	12	-0.658917	-1.65315	0.017694	0.416607	0.402836	328	tags=50%, list=19%, signal=41%	P04908/Q9Y265/P0C0S5/Q16777/Q8N257/P16104
M12485	GOBP_NEGATIVE_REGULATION_OF_INTRINSIC_APOPTOTIC_SIGNALING_PATHWAY	21	-0.560257	-1.62421	0.0177324	0.416607	0.402836	234	tags=33%, list=14%, signal=29%	P62937/Q13547/P04792/P16070/P45880/Q03405/P53801
M23781	GOBP_RIBOSE_PHOSPHATE_BIOSYNTHETIC_PROCESS	43	0.460675	1.56153	0.0177324	0.416607	0.402836	338	tags=42%, list=20%, signal=35%	P27708/P55263/P22392/P09874/Q01433/P09622/Q06203/P00492/P00813/P38606/O00154/P29401/Q8N142/P31939/Q9NVE7/P30520/P49915/P04075
M11292	GOBP_HORMONE_TRANSPORT	27	-0.521072	-1.58616	0.0178749	0.416607	0.402836	167	tags=30%, list=10%, signal=27%	Q9BV40/Q12846/P05543/O00161/P62820/Q12904/P04083/Q15836
M16781	GOBP_ANATOMICAL_STRUCTURE_HOMEOSTASIS	56	0.426392	1.52505	0.0180164	0.416607	0.402836	113	tags=16%, list=7%, signal=16%	Q96DA0/P01833/P78423/P02787/P31025/P02788/P17302/O95153/P07954
M373	VILLANUEVA_LIVER_CANCER_KRT19_DN	12	0.680632	1.69787	0.0181579	0.416607	0.402836	181	tags=50%, list=10%, signal=45%	Q15493/P16152/P48506/P31937/P30837/Q07954
M15156	GOBP_PURINE_NUCLEOSIDE_MONOPHOSPHATE_BIOSYNTHETIC_PROCESS	16	0.584819	1.56744	0.0182486	0.416607	0.402836	334	tags=56%, list=19%, signal=46%	P55263/Q01433/Q06203/P00492/P00813/Q8N142/P31939/P30520/P49915
M41819	REACTOME_RAC3_GTPASE_CYCLE	18	-0.604399	-1.67345	0.0183343	0.416607	0.402836	416	tags=61%, list=24%, signal=47%	P02786/O15173/P43121/Q15758/P60953/P05556/Q03135/Q8IZP0/Q9Y2A7/O00161/Q15836
M19443	GUTIERREZ_MULTIPLE_MYELOMA_UP	10	-0.702409	-1.67926	0.0185242	0.416607	0.402836	239	tags=60%, list=14%, signal=52%	P61978/P62745/P21796/P27824/P45880/Q08722
M650	HOLLERN_SQUAMOUS_BREAST_TUMOR	24	0.55504	1.67926	0.0186643	0.416607	0.402836	424	tags=58%, list=24%, signal=45%	Q6KB66/Q08554/Q15517/Q14533/Q13509/P17302/Q08188/P08779/P50452/Q9NZT1/P01040/Q03001/Q01469/P02538
M17093	GOBP_MEIOTIC_CELL_CYCLE	20	-0.554455	-1.57442	0.0187385	0.416607	0.402836	261	tags=30%, list=15%, signal=26%	O43684/P27797/Q9UQE7/Q08J23/P67775/P16104
M16783	GOBP_REGULATION_OF_EPITHELIAL_TO_MESENCHYMAL_TRANSITION	17	-0.597305	-1.62621	0.0187749	0.416607	0.402836	103	tags=35%, list=6%, signal=34%	P12644/P01137/P17813/P29508/P67775/P20827
M4242	RIZKI_TUMOR_INVASIVENESS_2D_UP	13	0.649018	1.65485	0.0187786	0.416607	0.402836	60	tags=23%, list=3%, signal=22%	P27708/P01344/P01266
M1993	KYNG_WERNER_SYNDROM_AND_NORMAL_AGING_DN	41	0.471996	1.58935	0.0188899	0.416607	0.402836	112	tags=20%, list=6%, signal=19%	O00743/Q15493/P01344/P31943/Q14457/Q13617/P52597/P31431
M4627	GOBP_REGULATION_OF_CELL_POPULATION_PROLIFERATION	204	-0.308034	-1.36853	0.0190002	0.416607	0.402836	303	tags=26%, list=18%, signal=25%	Q13155/P29590/P48059/P68400/P60033/P12644/P09211/P04899/P27797/Q9P0V3/P60953/P05556/Q86X55/P17931/P08631/Q969H8/Q13547/Q03135/P09493/P49747/O60884/Q32P28/Q10589/Q8IZP0/Q99439/Q9Y240/Q9UHI8/Q13418/Q16270/P35221/Q12846/P61769/Q99584/P35232/P05106/P01137/P17813/P29508/P07996/O14964/Q10588/P06756/O00501/P09758/P28799/Q12904/P04083/Q99623/Q8TDI0/P31949/Q5ZPR3/Q08722/P55290/P21926
M12269	GOBP_LEUKOCYTE_MIGRATION	65	-0.394665	-1.47028	0.0190706	0.416607	0.402836	292	tags=29%, list=17%, signal=25%	Q13464/P60033/P23284/P27797/O95747/P62937/P60953/P05556/P17931/P08631/P63000/P07996/Q10588/P31151/Q9Y5Y7/Q12904/P04083/Q08722/P21926
M22381	GOBP_AMP_BIOSYNTHETIC_PROCESS	12	0.678862	1.69345	0.019089	0.416607	0.402836	303	tags=58%, list=18%, signal=48%	P55263/Q06203/P00492/P00813/Q8N142/P31939/P30520
M12040	GOBP_PROTEIN_LOCALIZATION_TO_ENDOPLASMIC_RETICULUM	13	-0.644446	-1.65089	0.0194202	0.42124	0.407315	71	tags=31%, list=4%, signal=30%	Q9H444/P61026/P51572/Q15005
M29556	REACTOME_EUKARYOTIC_TRANSLATION_ELONGATION	83	-0.374755	-1.45635	0.0197169	0.42124	0.407315	640	tags=55%, list=37%, signal=37%	P30050/P36578/P42677/P27635/P63173/P25398/P62266/P61254/P83731/P39019/P46783/P62979/P40429/P61513/P61247/P50914/P62277/P46776/P32969/Q969Q0/Q9UNX3/P62244/P46782/P62753/P05387/P62857/P62851/P62750/P62424/P08708/P46778/P62906/P49207/P46777/P61927/P62841/P26373/P08865/P60866/Q02543/P47914/P68104/P62273/P62917/P18077/P22090
M1788	NIKOLSKY_BREAST_CANCER_16P13_AMPLICON	10	0.71531	1.70656	0.0197685	0.42124	0.407315	37	tags=20%, list=2%, signal=20%	Q96DA0/Q9UNE7
M11069	GOBP_REGULATION_OF_EPITHELIAL_CELL_MIGRATION	63	-0.390122	-1.43976	0.0197966	0.42124	0.407315	176	tags=32%, list=10%, signal=30%	O75340/P19174/P67870/O75116/P12644/O15123/P27797/P04792/P62745/P07737/P63000/P05106/P01137/P07996/P09758/P28799/P04083/P12429/Q6UXH8/P20827
M986	SMIRNOV_CIRCULATING_ENDOTHELIOCYTES_IN_CANCER_UP	32	-0.473152	-1.51248	0.0198146	0.42124	0.407315	368	tags=34%, list=21%, signal=28%	P43121/P07858/P04908/Q15582/P08631/P01137/P17813/P07996/Q10588/P51153/P21926
M15483	GOBP_CELL_CELL_RECOGNITION	13	-0.643036	-1.64727	0.0199957	0.421245	0.40732	426	tags=69%, list=25%, signal=53%	P50990/P49368/P17987/P60033/P17931/P48643/P50991/P45880/P21926
M6566	GOBP_NEGATIVE_REGULATION_OF_CELL_POPULATION_PROLIFERATION	81	-0.362244	-1.39377	0.0200202	0.421245	0.40732	387	tags=37%, list=22%, signal=30%	P17948/Q02750/Q9GZX9/P67870/P39060/P04908/Q13155/P29590/P12644/P09211/Q9P0V3/Q03135/P09493/Q32P28/Q8IZP0/Q9UHI8/Q13418/Q16270/P35221/P61769/P35232/P01137/P07996/O14964/Q12904/Q99623/Q8TDI0/P31949/P55290/P21926
M16810	GOBP_AMP_METABOLIC_PROCESS	14	0.642254	1.66075	0.0206514	0.432309	0.418019	303	tags=57%, list=18%, signal=48%	P55263/Q01433/Q06203/P00492/P00813/Q8N142/P31939/P30520
M11355	KEGG_TIGHT_JUNCTION	33	-0.491112	-1.58702	0.020872	0.434029	0.419681	354	tags=39%, list=20%, signal=32%	P67870/P35580/P68400/P26232/P04899/P60953/P19784/P35221/O00501/P67775/Q9UKX2/P51153/P62070
M19097	SWEET_LUNG_CANCER_KRAS_UP	133	-0.326546	-1.36756	0.0209451	0.434029	0.419681	370	tags=32%, list=21%, signal=27%	P04080/P00387/P07858/P49368/P50552/P80723/P05023/P11142/O15031/P39060/P30419/P04908/Q9NVJ2/P62906/P12644/P60228/Q32MZ4/P21283/P61927/P61421/Q15582/P60174/P17931/Q969H8/Q16401/Q9BV40/P62917/P49327/Q15084/Q8TCT9/P07602/P07996/Q10588/P09758/P16070/P08962/Q99623/Q96QD8/Q04637/Q9BRX8/Q9UHG3/P21926
M8104	KEGG_AMINO_SUGAR_AND_NUCLEOTIDE_SUGAR_METABOLISM	23	0.561878	1.68413	0.0211847	0.435403	0.42101	586	tags=65%, list=34%, signal=44%	Q9Y5P6/Q9NR45/P07902/P46926/Q9BZP6/Q8TDQ7/P06744/P36871/Q9UJ70/Q8NFW8/O60547/P06865/Q16851/Q96G03/Q13630
M41836	REACTOME_CELLULAR_RESPONSE_TO_STARVATION	93	-0.360919	-1.41684	0.0213049	0.435403	0.42101	640	tags=56%, list=37%, signal=37%	P36578/P42677/P27635/P63173/P25398/P62266/P61254/P83731/P39019/P46783/P62979/O75348/P40429/P61513/P61247/P50914/P62277/P46776/P32969/Q969Q0/Q9UNX3/Q9UI12/P62244/P46782/P62753/P05387/P62857/P62851/P62750/P62424/P08708/P46778/P62906/Q16864/P49207/P46777/P21283/P61927/Q9P0V3/P61421/P62841/P26373/P08865/P36543/P60866/Q02543/P47914/P62273/P62917/P20042/P18077/P22090
M67	PID_ARF6_TRAFFICKING_PATHWAY	22	-0.548409	-1.60473	0.0213509	0.435403	0.42101	341	tags=41%, list=20%, signal=33%	Q00610/O43150/P05556/Q96KP1/Q9UPT5/P35221/P08648/P06756/Q15836
M16100	GOBP_POSITIVE_REGULATION_OF_PROTEIN_POLYMERIZATION	17	-0.588635	-1.60261	0.0214359	0.435403	0.42101	355	tags=47%, list=21%, signal=38%	P36405/P50552/P08631/Q9Y2A7/P36404/P07737/P63000/O15144
M1676	SHEN_SMARCA2_TARGETS_DN	11	0.695085	1.7049	0.0219362	0.443212	0.428561	251	tags=55%, list=15%, signal=47%	P01266/P02787/Q9H3T3/Q10570/Q00266/O75144
M6510	PASQUALUCCI_LYMPHOMA_BY_GC_STAGE_UP	46	-0.43187	-1.48957	0.0220364	0.443212	0.428561	170	tags=26%, list=10%, signal=24%	P15151/P62745/Q9Y2A7/Q9BVK6/P07237/Q15084/Q8TCT9/P08758/P16070/Q9H1C7/P09497/Q15005
M2125	CHICAS_RB1_TARGETS_SENESCENT	83	0.3747	1.43223	0.0223671	0.444325	0.429637	377	tags=37%, list=22%, signal=31%	Q96DA0/P01009/P01344/Q15063/P05121/P47895/P43487/Q9NQ30/O95497/Q02952/P35244/P43246/Q6P179/P01024/P43490/P00492/P49321/P23921/P12004/O00154/P21810/Q08380/P14678/Q9UEY8/Q09028/P49915/Q14974/P11586/P20700/Q86V48/P28062
M27620	REACTOME_NEUTROPHIL_DEGRANULATION	205	-0.296895	-1.31656	0.0227729	0.444325	0.429637	169	tags=18%, list=10%, signal=18%	Q10589/Q9BV40/Q99439/P68104/P61106/P63167/Q99460/P61769/P63000/Q92542/P30041/Q5D862/P68871/O00161/P29508/P07602/Q10588/P31151/P06756/P61026/P61626/P07355/O00232/P28799/P16070/P62834/P13987/Q96BM9/P53990/P08962/Q9H1C7/Q03405/P31949/Q08722/P51148/Q8NG11
M22657	GOBP_REGULATION_OF_CELLULAR_CARBOHYDRATE_METABOLIC_PROCESS	15	0.629446	1.66224	0.0228651	0.444325	0.429637	28	tags=20%, list=2%, signal=20%	P62136/Q15493/P01344
M27921	REACTOME_NONSENSE_MEDIATED_DECAY_NMD	85	-0.365483	-1.42128	0.0228866	0.444325	0.429637	640	tags=54%, list=37%, signal=36%	P36578/P42677/P27635/P63173/P25398/P62266/P61254/P83731/P39019/P46783/P62979/P40429/P61513/P61247/P50914/P62277/P46776/P32969/Q969Q0/Q9UNX3/P62244/P46782/P62753/P05387/P62857/P62851/P62750/P62424/P08708/P46778/P62906/P49207/P46777/P61927/P62841/P26373/P08865/P60866/Q02543/P47914/P62273/P62917/P18077/P22090/P67775/Q04637
M29076	GOBP_RIBONUCLEOSIDE_MONOPHOSPHATE_METABOLIC_PROCESS	21	0.577095	1.66821	0.02289	0.444325	0.429637	356	tags=52%, list=21%, signal=42%	P27708/P55263/Q01433/Q06203/P00492/P00813/Q8N142/P31939/P30520/P49915/Q14117
M14851	GOBP_POSITIVE_REGULATION_OF_EPITHELIAL_CELL_MIGRATION	43	-0.438174	-1.50002	0.02289	0.444325	0.429637	176	tags=37%, list=10%, signal=34%	O75340/P19174/O75116/P12644/P27797/P04792/P62745/P07737/P63000/P05106/P01137/P07996/P28799/P04083/P12429/Q6UXH8
M5549	TURASHVILI_BREAST_LOBULAR_CARCINOMA_VS_LOBULAR_NORMAL_UP	18	0.60683	1.68236	0.0229581	0.444325	0.429637	153	tags=28%, list=9%, signal=26%	O00743/P01833/P01009/Q08257/Q15746
M15630	GOBP_REGULATION_OF_TRANSPORT	228	-0.296384	-1.32884	0.0229581	0.444325	0.429637	348	tags=27%, list=20%, signal=25%	P35580/P05023/P11142/O00159/P30419/P11279/Q07666/P00441/P78417/P02647/Q13263/P46459/P29590/Q13464/P60033/P12644/O75923/P04899/P27797/O95747/P61978/P62937/P02765/P60953/P19784/Q14204/P05556/P17931/P48509/P08631/Q03135/Q32P28/Q9BV40/Q99439/P21796/Q08J23/Q12846/P61769/P63000/P05106/P54709/P16615/P01137/P07996/O14964/P06756/Q8N668/P61026/P07355/Q12904/P62834/P04083/P08962/Q15041/P51153/P51572/Q99623/…
M6387	WINNEPENNINCKX_MELANOMA_METASTASIS_UP	31	0.482918	1.55154	0.023205	0.446996	0.43222	442	tags=45%, list=26%, signal=34%	O00469/P43487/Q15417/P35244/Q9NR45/O95373/P49321/P12004/Q09161/Q96RS6/P49915/Q9NTK5/P26639/O95347
M14668	GOBP_NEGATIVE_REGULATION_OF_APOPTOTIC_SIGNALING_PATHWAY	50	-0.428903	-1.51165	0.0236302	0.4522	0.437252	284	tags=34%, list=16%, signal=29%	P68400/P12644/P09211/P04899/O75832/P62937/P19784/P17931/Q13547/P04792/P35221/P07996/P06756/P16070/P45880/Q03405/P53801
M13839	GOBP_SIGNAL_RELEASE	38	-0.464481	-1.537	0.0236956	0.4522	0.437252	167	tags=24%, list=10%, signal=22%	Q9BV40/Q12846/P16615/O00161/P62820/Q12904/P62834/P04083/Q15836
M2122	VERHAAK_GLIOBLASTOMA_MESENCHYMAL	66	-0.390296	-1.45713	0.0239548	0.454105	0.439093	456	tags=41%, list=26%, signal=31%	Q9UGI8/Q14764/P07942/P13797/Q9UBG0/Q9Y5K6/Q9NZM1/P07858/P20908/O15460/Q13637/Q32MZ4/Q15582/Q9Y6Y9/P17931/Q99439/P29466/Q99584/P17813/P08648/P07996/P07355/P28799/P04083/Q03405/P31949/Q16563
M27694	REACTOME_RNA_POLYMERASE_II_TRANSCRIPTION_TERMINATION	14	0.635338	1.64287	0.0240167	0.454105	0.439093	304	tags=50%, list=18%, signal=42%	Q8NI27/Q13838/P62318/Q01081/Q10570/Q09161/P14678
M24913	GOBP_EXOCYTIC_PROCESS	14	-0.614415	-1.60449	0.0243513	0.458283	0.443134	167	tags=43%, list=10%, signal=39%	Q9BV40/Q12846/O00161/P61026/P51153/Q15836
M11869	GOBP_CATION_TRANSPORT	95	-0.362026	-1.42975	0.0244611	0.458283	0.443134	309	tags=33%, list=18%, signal=28%	P78417/P46459/P29590/Q16864/O75947/Q15758/P04899/P21283/O95747/P61421/P05556/P36543/P17931/Q03135/Q9BV40/P21796/P61769/P05106/P54709/P16615/P08133/O00161/P06756/Q8N668/P07355/P35670/P08962/P56385/Q99623/Q15836/Q96QD8
M11684	GOBP_PROTEIN_LOCALIZATION_TO_CELL_PERIPHERY	69	-0.382372	-1.43336	0.0248843	0.462644	0.44735	355	tags=32%, list=21%, signal=26%	P36405/O75116/Q00610/P46459/Q13464/P60033/P05556/P17931/Q15172/Q03135/Q15436/Q9BV40/Q9UPT5/Q12846/P54709/P01137/P60903/P61026/P62834/P51153/Q15836/Q8NG11
M2512	FOSTER_KDM1A_TARGETS_UP	15	0.625762	1.65251	0.024985	0.462644	0.44735	533	tags=73%, list=31%, signal=51%	Q8WVV4/P10619/P06858/Q08380/P02458/O15020/O75874/Q16762/Q14195/P15169/P21266
M11681	GOBP_ORGANOPHOSPHATE_BIOSYNTHETIC_PROCESS	74	0.390805	1.46699	0.0250321	0.462644	0.44735	372	tags=39%, list=21%, signal=32%	P27708/P55263/Q14457/P53602/P48163/P22392/P09874/Q9NRY6/Q01433/O15269/P09622/P43490/Q15046/Q06203/P00492/P23921/P00813/P38606/O00154/P29401/Q8N142/P31939/Q9NVE7/P30520/P49915/P04075/O75874/P11586/P40261
M4552	TARTE_PLASMA_CELL_VS_B_LYMPHOCYTE_UP	27	-0.507654	-1.54531	0.025986	0.466868	0.451435	281	tags=41%, list=16%, signal=35%	Q8IV08/P13598/P04843/P23284/P17931/P18085/Q03135/P07237/Q15084/P27824/Q15005
M11490	GOBP_ESTABLISHMENT_OF_PROTEIN_LOCALIZATION_TO_ORGANELLE	83	-0.36732	-1.42745	0.0260383	0.466868	0.451435	356	tags=30%, list=21%, signal=25%	P49368/O60684/P11142/P30419/P11279/P17987/Q9H444/Q13263/P29590/P12644/O00203/O60832/P16401/P19784/P48643/P50991/P40227/P01137/O14964/Q5JRX3/P61026/P51572/Q99623/P53801/Q15005
M11169	GOBP_ANION_TRANSMEMBRANE_TRANSPORT	15	-0.620052	-1.61905	0.0260635	0.466868	0.451435	272	tags=67%, list=16%, signal=57%	Q00325/O75915/Q15758/P51798/P05556/P21796/Q9Y277/Q15041/P45880/Q9UHG3
M16442	GOBP_CIRCULATORY_SYSTEM_DEVELOPMENT	185	-0.30404	-1.33738	0.0263924	0.466868	0.451435	392	tags=30%, list=23%, signal=26%	Q16394/P08572/P17948/O75340/Q02750/P78344/P78527/P19174/P43121/P20908/O75116/P80723/P39060/P10253/P29590/Q13464/P02462/P12644/O15123/O00214/P27797/P60953/Q15582/P05556/Q969H8/Q03135/P09493/Q9BXJ9/P49747/O00151/P04792/P62745/Q9UHI8/Q13418/P29992/P05106/P01137/P17813/P08648/P07996/O14964/P31151/Q19T08/P06756/O00501/P07355/P28799/Q12904/P62834/P04083/P12429/P27658/Q6UXH8/P20827/P55290
M1511	GUENTHER_GROWTH_SPHERICAL_VS_ADHERENT_DN	19	-0.575686	-1.61692	0.0265145	0.466868	0.451435	330	tags=47%, list=19%, signal=39%	P39060/P10253/P05556/Q03135/P29466/P08758/P16070/P13987/Q03405
M11909	GOBP_ORGANIC_ACID_TRANSPORT	20	-0.538081	-1.52792	0.0265336	0.466868	0.451435	272	tags=35%, list=16%, signal=30%	Q15758/Q9P0V3/P05556/P07996/P04083/Q15041/Q96QD8
M12794	GOBP_ANTIGEN_PROCESSING_AND_PRESENTATION	30	-0.483844	-1.527	0.0265868	0.466868	0.451435	409	tags=50%, list=24%, signal=39%	P25311/Q9NZ08/Q16394/P30101/P61020/Q9NVJ2/Q13637/O00203/P27797/Q15286/Q9UIQ6/P61769/P07996/P61026/Q14699
M15105	GOBP_NUCLEOSIDE_MONOPHOSPHATE_METABOLIC_PROCESS	22	0.551003	1.62823	0.0266525	0.466868	0.451435	356	tags=50%, list=21%, signal=40%	P27708/P55263/Q01433/Q06203/P00492/P00813/Q8N142/P31939/P30520/P49915/Q14117
M7098	KEGG_ECM_RECEPTOR_INTERACTION	37	-0.460464	-1.52309	0.026694	0.466868	0.451435	458	tags=41%, list=26%, signal=30%	P04275/P07942/P08572/P20908/P49746/P02462/P05556/P49747/P05106/P12111/P08648/P07996/P06756/P16070/Q08722
M16687	GOBP_HETEROTYPIC_CELL_CELL_ADHESION	17	-0.575273	-1.56623	0.0267578	0.466868	0.451435	219	tags=59%, list=13%, signal=52%	P19256/Q9NVD7/P02679/P02647/P05556/P05106/P08648/P06756/P16070/Q08722
M14232	GOBP_POSITIVE_REGULATION_OF_INTRACELLULAR_SIGNAL_TRANSDUCTION	135	-0.323587	-1.35901	0.0267603	0.466868	0.451435	320	tags=29%, list=18%, signal=26%	P23246/Q14258/P00441/P02647/P29590/Q13464/P48059/P60033/P12644/P04899/P27797/P61927/P62937/P60953/P62841/P05556/Q969H8/Q03135/P60866/Q10589/Q92499/P29466/Q13418/Q99584/P35232/P63000/P01137/P17813/P07996/P31151/P06756/P16070/P62834/P50591/P51572/Q99623/Q8TDI0/P20827/P55290
M4752	WATANABE_RECTAL_CANCER_RADIOTHERAPY_RESPONSIVE_DN	38	-0.4565	-1.5106	0.026793	0.466868	0.451435	219	tags=32%, list=13%, signal=28%	P09211/P05556/P17931/Q15436/P60866/P40227/P12111/P68871/P06756/P67775/P04083/Q14112
M12275	BROWNE_HCMV_INFECTION_24HR_UP	18	-0.584801	-1.61919	0.0268413	0.466868	0.451435	17	tags=17%, list=1%, signal=17%	P09497/P51148/Q9BVC6
M11889	GOBP_REGULATION_OF_VESICLE_MEDIATED_TRANSPORT	108	-0.34176	-1.38921	0.0269355	0.466868	0.451435	321	tags=31%, list=19%, signal=27%	P11279/P00441/P02647/P46459/Q13464/O75923/P04899/P27797/P61978/P02765/P60953/P17931/P48509/P08631/Q03135/Q9BV40/Q99439/Q12846/P61769/P63000/P05106/P16615/O14964/P06756/P61026/P07355/P62834/P04083/P08962/P51153/Q08722/P55290/P51148
M9945	UDAYAKUMAR_MED1_TARGETS_DN	31	-0.490019	-1.54351	0.0271028	0.466868	0.451435	444	tags=42%, list=26%, signal=32%	P06396/Q9NZ08/P51991/P07305/O15460/O15212/O43149/P09493/P16403/P62745/Q9UHI8/P20827/P53801
M16895	GOBP_RECEPTOR_CLUSTERING	11	0.684178	1.67815	0.0273018	0.466868	0.451435	3	tags=9%, list=0%, signal=9%	P01833
M15410	TAKEDA_TARGETS_OF_NUP98_HOXA9_FUSION_16D_DN	18	-0.584287	-1.61776	0.027428	0.466868	0.451435	66	tags=22%, list=4%, signal=22%	P09758/P13987/P12429/Q9BRX8
M4932	GAJATE_RESPONSE_TO_TRABECTEDIN_UP	21	-0.541999	-1.57128	0.0275671	0.466868	0.451435	444	tags=52%, list=26%, signal=39%	P06396/P02679/P30408/P35580/P00736/Q15582/Q16270/P16070/P04083/Q15041/Q14112
M8785	GOBP_CYTOSKELETON_DEPENDENT_INTRACELLULAR_TRANSPORT	37	-0.459705	-1.52058	0.0275989	0.466868	0.451435	385	tags=51%, list=22%, signal=41%	P42704/P36405/P11142/O00159/Q13409/Q9NVJ2/O43795/P11279/P23246/O94832/P00441/O00203/Q9BQE3/P60953/P68363/Q14204/P04792/P62820/Q96BM9
M1286	HOSHIDA_LIVER_CANCER_SUBCLASS_S3	68	0.398381	1.4777	0.0276995	0.466868	0.451435	178	tags=21%, list=10%, signal=19%	P55263/Q15493/P43251/Q14624/P30519/Q93088/P21399/Q92820/P07954/P16152/P12259/P0C0L4/Q15746/P30837
M2488	FORTSCHEGGER_PHF8_TARGETS_DN	107	-0.338547	-1.37211	0.0278018	0.466868	0.451435	302	tags=25%, list=17%, signal=22%	P49746/Q12765/P21589/P07305/P46459/Q9BPU6/O75923/O75832/P58546/P18085/Q8IUD2/Q8IZ83/P62873/Q03135/P54578/Q9BV40/P56377/Q13418/Q16270/P61163/P62820/P13987/P27824/Q08722/P21926/Q8NG11/Q14699
M16524	LEE_LIVER_CANCER_DENA_UP	17	-0.568749	-1.54847	0.0279405	0.466868	0.451435	84	tags=29%, list=5%, signal=28%	P07996/P08758/P07355/P04083/P08962
M27660	REACTOME_MITOTIC_PROPHASE	26	-0.512778	-1.54169	0.0280889	0.466868	0.451435	200	tags=31%, list=12%, signal=28%	O75531/P0C0S5/Q16777/Q9H0U4/Q8N257/P62820/P67775/P16104
M725	REACTOME_TRANSPORT_OF_MATURE_TRANSCRIPT_TO_CYTOPLASM	12	0.657331	1.63974	0.0280902	0.466868	0.451435	268	tags=50%, list=15%, signal=43%	Q8NI27/Q13838/Q01081/Q10570/P55735/Q09161
M14314	KEGG_PURINE_METABOLISM	31	0.477039	1.53265	0.0281054	0.466868	0.451435	334	tags=42%, list=19%, signal=34%	P55263/P22392/Q01433/Q06203/P00492/P23921/P00813/O15160/Q8N142/P31939/P30520/O00408/P49915
M7405	HOFFMANN_PRE_BI_TO_LARGE_PRE_BII_LYMPHOCYTE_DN	12	-0.633569	-1.58955	0.028339	0.466929	0.451494	101	tags=42%, list=6%, signal=40%	O15118/P17813/P07355/P04083/P21926
M42791	GOBP_LEUKOCYTE_DEGRANULATION	11	-0.656807	-1.61155	0.0284763	0.466929	0.451494	202	tags=73%, list=12%, signal=65%	P11279/P08631/Q9BV40/Q12846/Q99584/O00161/P12429/Q15836
M18387	KORKOLA_SEMINOMA_UP	11	-0.656805	-1.61154	0.0284763	0.466929	0.451494	218	tags=45%, list=13%, signal=40%	P60174/P46063/Q8IUD2/Q99623/P21926
M13722	GOBP_REGULATION_OF_GLUCOSE_METABOLIC_PROCESS	11	0.67918	1.66589	0.0285642	0.466929	0.451494	28	tags=27%, list=2%, signal=27%	P62136/Q15493/P01344
M14653	GOBP_PROTEIN_LOCALIZATION_TO_ORGANELLE	152	-0.313687	-1.33137	0.0289924	0.46967	0.454145	442	tags=32%, list=26%, signal=26%	P12270/Q15555/P55072/P50990/Q96QK1/P02786/O75367/Q9Y5K6/P13473/P49368/P36405/O75116/O60684/P11142/P30419/P11279/P17987/Q9H444/Q13263/P29590/P60033/P12644/O00203/P50395/O43684/O60832/P27797/Q15286/P16401/Q9P0V3/P19784/P48643/P18085/P50991/P40227/Q92499/Q9UPT5/P36404/P35221/P01137/O14964/Q5JRX3/P61026/P62834/P51572/Q99623/P53801/Q15005
M26954	REACTOME_TRANSLOCATION_OF_SLC2A4_GLUT4_TO_THE_PLASMA_MEMBRANE	32	-0.459979	-1.47037	0.0290305	0.46967	0.454145	264	tags=38%, list=15%, signal=32%	Q9BQE3/P27348/P68363/Q9UIQ6/Q96KP1/P61106/Q9UPT5/Q12846/P63000/O00161/P61026/P51153
M8395	REACTOME_HEMOSTASIS	163	-0.306466	-1.31871	0.0292031	0.46967	0.454145	265	tags=23%, list=15%, signal=22%	O15123/Q9BQE3/P04899/P62937/P02765/P60953/P68363/P05556/Q15172/Q13547/P62873/Q03135/P45973/Q96AP7/P62745/P29992/Q12846/P07737/P63000/P05106/P54709/P16615/P01137/P68871/P08648/P07602/P07996/P60903/P06756/P08758/P07355/P16070/P67775/P62834/P08962/Q03405/Q08722/P21926
M16176	GOBP_POSITIVE_REGULATION_OF_CELL_CYCLE_G1_S_PHASE_TRANSITION	10	-0.684296	-1.63595	0.0292737	0.46967	0.454145	159	tags=40%, list=9%, signal=37%	Q9UHI8/P04083/Q99623/Q04637
M18265	GOBP_GOLGI_VESICLE_TRANSPORT	69	-0.377202	-1.41398	0.0294087	0.46967	0.454145	204	tags=26%, list=12%, signal=24%	P18085/Q15436/Q96KP1/Q6DD88/P61106/O75396/Q9H0U4/P53621/Q9BVK6/O00161/P62820/Q8N668/P61026/P51153/P51572/Q15836/Q567U6/O14828
M174	PID_UPA_UPAR_PATHWAY	17	-0.565805	-1.54045	0.0294188	0.46967	0.454145	114	tags=41%, list=7%, signal=39%	P05556/P63000/P05106/P01137/P08648/P06756/Q03405
M12838	GOBP_REGULATION_OF_ENDOTHELIAL_CELL_MIGRATION	49	-0.421706	-1.48177	0.0297124	0.469957	0.454422	382	tags=37%, list=22%, signal=29%	O75340/P19174/P67870/O75116/P12644/O15123/P27797/P04792/P62745/P63000/P05106/P01137/P07996/P28799/P04083/P12429/Q6UXH8/P20827
M15411	BARIS_THYROID_CANCER_DN	23	-0.526307	-1.55281	0.0297688	0.469957	0.454422	217	tags=26%, list=13%, signal=23%	P46063/P35221/P01137/P16070/P50591/P27658
M16681	GOBP_SYNCYTIUM_FORMATION	12	-0.627374	-1.57401	0.0297804	0.469957	0.454422	531	tags=58%, list=31%, signal=41%	P35579/Q13443/Q9P2B2/Q9NZM1/P60033/P05556/P21926
M10276	LEE_NEURAL_CREST_STEM_CELL_DN	17	-0.564495	-1.53689	0.0300101	0.47001	0.454473	126	tags=18%, list=7%, signal=17%	O95757/P20827/P21926
M15511	GOBP_REGULATION_OF_CELLULAR_COMPONENT_MOVEMENT	188	-0.305093	-1.3455	0.0300128	0.47001	0.454473	282	tags=30%, list=16%, signal=28%	P17948/Q86UX7/O75340/P19174/O00592/P43121/Q9NS98/P67870/O75116/O15031/O00159/P11279/Q13464/P60033/P12644/O15123/P26232/P04899/P27797/O95747/P05556/P17931/P48509/Q03135/P09493/P04792/P62745/Q10589/Q99439/Q9UHI8/P35221/Q12846/P07737/P63000/P05106/P16615/P01137/P17813/P29508/P08648/P07996/Q10588/P31151/Q9Y5Y7/P06756/O00501/P09758/P28799/P04083/P12429/Q6UXH8/P31949/P20827/Q08722/P55290/P62070/P21926
M12069	GOBP_CELL_ACTIVATION_INVOLVED_IN_IMMUNE_RESPONSE	30	-0.473852	-1.49547	0.031096	0.485121	0.469085	321	tags=43%, list=19%, signal=36%	P11279/P60033/O75923/P17931/Q9BV40/Q12846/Q99584/P01137/O00161/P28799/P04083/P12429/Q15836
M2325	LEE_BMP2_TARGETS_DN	168	0.309087	1.3306	0.031298	0.48608	0.470011	378	tags=27%, list=22%, signal=24%	P27708/Q9UPU5/Q9BQA1/Q8WVV4/P15927/P05121/P48163/P17302/P35237/Q93088/P43487/P09874/Q13283/O43324/Q15417/P55060/P06280/P00338/Q9NQS3/Q9NZR1/Q99873/Q9NR50/Q9UBT2/Q9NQP4/P43490/Q06203/O43493/P49321/P23921/P15170/Q6ZRP7/P01130/Q09161/Q96RS6/P31939/O43286/Q8NI36/P07900/P15374/P49915/Q14974/P49588/Q12905/P11586/Q99575/P25685
M14371	NAKAMURA_TUMOR_ZONE_PERIPHERAL_VS_CENTRAL_DN	88	0.352698	1.36789	0.0313944	0.48608	0.470011	402	tags=31%, list=23%, signal=25%	Q96DA0/O00469/P13646/P02794/O75976/P05156/P00750/P51151/P31937/Q14254/P01024/P09960/P43490/P54803/Q8N142/P36871/O43286/P61923/O94979/Q9UEY8/Q9Y6W5/Q9H299/P10644/P25685/P12109/P61313/Q01469
M16587	SASSON_RESPONSE_TO_GONADOTROPHINS_UP	26	-0.507736	-1.52653	0.0316998	0.488963	0.4728	462	tags=50%, list=27%, signal=37%	P61019/P20339/Q02750/Q9NZH0/P39060/O15460/P11117/P50395/P62873/P62745/P61106/Q99460/P62820
M4002	GOBP_VASCULATURE_DEVELOPMENT	149	-0.325432	-1.38215	0.0324468	0.495706	0.479319	390	tags=30%, list=23%, signal=26%	P08572/P17948/O75340/Q02750/P19174/P43121/P20908/O75116/P39060/P29590/Q13464/P02462/P12644/O15123/O00214/P60953/Q15582/P05556/Q969H8/Q03135/Q9BXJ9/P49747/P04792/P62745/Q9UHI8/P05106/P01137/P17813/P08648/P07996/O14964/P31151/Q19T08/P06756/O00501/P07355/P28799/Q12904/P62834/P04083/P12429/P27658/Q6UXH8/P20827/P55290
M12992	GOBP_CARBOHYDRATE_DERIVATIVE_BIOSYNTHETIC_PROCESS	76	0.382862	1.44674	0.032468	0.495706	0.479319	338	tags=30%, list=20%, signal=25%	O00469/P27708/Q9Y5P6/P55263/P22392/P09874/Q01433/Q9NR45/P09622/Q06203/P00492/P23921/P00813/P38606/O00154/P29401/Q8N142/P31939/Q9NVE7/P30520/O43286/P49915/P04075
M1549	LINDVALL_IMMORTALIZED_BY_TERT_UP	25	-0.516989	-1.5409	0.0324993	0.495706	0.479319	159	tags=32%, list=9%, signal=29%	Q13263/P12644/Q9UHI8/Q16270/P22090/Q15836/Q96QD8/P21926
M17758	KEGG_ALANINE_ASPARTATE_AND_GLUTAMATE_METABOLISM	11	0.67032	1.64416	0.0326705	0.495873	0.479481	403	tags=55%, list=23%, signal=42%	P27708/Q06203/P17174/Q8N142/P30520/P04424
M40375	GOBP_POSITIVE_REGULATION_OF_GENE_EXPRESSION	165	-0.306839	-1.32384	0.032752	0.495873	0.479481	379	tags=28%, list=22%, signal=25%	Q02750/P78344/P78527/Q9NZH0/O75116/O60684/P11142/O15031/Q07666/P00441/Q13464/P48059/O15371/P60033/P46777/P12644/P60228/P27797/Q9Y6Y9/Q13547/Q03135/P04792/Q92499/Q99439/P29466/Q12846/P61769/Q99584/P35232/P30041/P01137/Q8IWU5/P17813/P62820/P07996/O14964/P60903/O00501/P07355/P04083/Q6UXH8/Q99623/Q5ZPR3/Q15836/Q96QD8/Q04637/Q14699
M13870	GOBP_GLUCOSE_METABOLIC_PROCESS	27	0.507017	1.56153	0.0331122	0.496088	0.479689	413	tags=44%, list=24%, signal=34%	P62136/Q15493/P01344/P17858/Q08043/Q93009/Q01813/P06744/P36871/P40261/Q01469/Q16531
M1796	ZHENG_GLIOBLASTOMA_PLASTICITY_UP	35	0.472742	1.56155	0.033247	0.496088	0.479689	442	tags=46%, list=26%, signal=35%	Q86SQ4/Q13509/P35237/P31431/P0C0L4/Q14254/P49321/P23921/Q13557/Q9Y646/O00154/Q01813/P20700/P01023/Q6PCB0/O95347
M1061	REACTOME_MEIOTIC_SYNAPSIS	12	-0.623275	-1.56373	0.0332498	0.496088	0.479689	188	tags=50%, list=11%, signal=45%	P04908/P0C0S5/Q9UQE7/Q16777/Q8N257/P16104
M2401	KOHOUTEK_CCNT1_TARGETS	12	-0.622424	-1.56159	0.0332498	0.496088	0.479689	123	tags=42%, list=7%, signal=39%	P02533/Q99584/P08758/P09758/P09497
M2973	GOBP_TUBE_DEVELOPMENT	187	-0.300476	-1.32435	0.0333765	0.496173	0.479771	392	tags=30%, list=23%, signal=26%	Q16394/P08572/P17948/P21980/O75340/Q02750/P19174/O00592/P43121/P67870/P50552/O75116/P80723/O15031/P39060/Q13155/P29590/Q13464/P02462/P12644/Q15185/O00203/O15123/P60953/Q15582/P05556/Q969H8/Q03135/Q9BXJ9/P49747/P04792/P62745/Q9UHI8/Q13418/P07737/P05106/P01137/P17813/P08648/P07996/O14964/P31151/Q19T08/P06756/O00501/P07355/P09758/P28799/Q12904/P62834/P04083/P12429/P27658/Q6UXH8/Q99623/P20827/P55290
M11525	GOBP_POSITIVE_REGULATION_OF_SUBSTRATE_ADHESION_DEPENDENT_CELL_SPREADING	18	-0.569796	-1.57764	0.0339018	0.500096	0.483564	308	tags=56%, list=18%, signal=46%	P02679/P02647/P48059/P27797/P60953/Q13418/P63000/P07237/O15144/P60903
M12005	GOBP_POSITIVE_REGULATION_OF_ENDOTHELIAL_CELL_MIGRATION	33	-0.474556	-1.53352	0.0339889	0.500096	0.483564	382	tags=45%, list=22%, signal=36%	O75340/P19174/O75116/P12644/P27797/P04792/P62745/P63000/P05106/P01137/P07996/P28799/P04083/P12429/Q6UXH8
M624	HOLLERN_EMT_BREAST_TUMOR_DN	10	0.687756	1.64082	0.0340109	0.500096	0.483564	353	tags=50%, list=20%, signal=40%	Q8WVV4/P02788/Q7Z406/O15020/P10586
M1386	KEGG_PENTOSE_PHOSPHATE_PATHWAY	14	0.614287	1.58843	0.0341279	0.500096	0.483564	338	tags=50%, list=20%, signal=41%	P09972/P17858/P29401/Q01813/P06744/P36871/P04075
M27827	REACTOME_CELLULAR_RESPONSES_TO_STIMULI	260	-0.277961	-1.26946	0.0345591	0.50151	0.484931	442	tags=31%, list=26%, signal=27%	P12270/P05387/P62857/P62851/P55072/P28072/Q13200/P02768/Q06830/P62750/P62424/P08708/P62191/P42704/P46778/P16402/P62195/P28065/P67870/P11142/Q13409/P04908/P62906/P00441/P02647/P07305/Q16864/P49207/P68400/P46777/P09211/Q15185/Q9BQE3/P21283/P27797/P16401/O75832/P61927/Q9P0V3/P61421/P62841/P68363/P19784/P26373/Q14204/P08865/Q9Y6Y9/Q86X55/P36543/Q969H8/P10412/P0C0S5/O60884/Q16401/P60866/P16403/Q02543/…
M14656	GOBP_ENDOCYTIC_RECYCLING	15	-0.603688	-1.57632	0.0346272	0.50151	0.484931	245	tags=27%, list=14%, signal=23%	Q15286/P61106/P51153/Q567U6
M768	REN_ALVEOLAR_RHABDOMYOSARCOMA_UP	10	0.686438	1.63768	0.0346466	0.50151	0.484931	28	tags=20%, list=2%, signal=20%	P17661/P01344
M39570	WP_AMINO_ACID_METABOLISM	37	0.459056	1.53701	0.034764	0.50151	0.484931	532	tags=43%, list=31%, signal=31%	P27708/Q93088/P07954/P31937/P00338/P09622/P17174/O75390/O75874/P40926/Q16853/P49419/P53396/P23381/P48637/P16930
M13217	GOBP_SPERM_EGG_RECOGNITION	10	-0.668466	-1.59811	0.0349578	0.50151	0.484931	426	tags=70%, list=25%, signal=53%	P50990/P49368/P17987/P48643/P50991/P45880/P21926
M5755	KAPOSI_LIVER_CANCER_MET_UP	10	-0.667878	-1.5967	0.0349578	0.50151	0.484931	219	tags=40%, list=13%, signal=35%	P05556/P06756/P08758/P08962
M13639	CORRE_MULTIPLE_MYELOMA_UP	12	0.642428	1.60257	0.0358712	0.511707	0.494792	229	tags=50%, list=13%, signal=44%	Q9BY76/Q14624/P05121/P47895/P00750/Q9UHD8
M10607	GOBP_INTERMEDIATE_FILAMENT_ORGANIZATION	10	0.683873	1.63156	0.035918	0.511707	0.494792	215	tags=50%, list=12%, signal=44%	P17661/P13646/P08779/P35908/P08670
M17152	GOBP_MUSCLE_CELL_DIFFERENTIATION	51	-0.405921	-1.43409	0.0364569	0.516594	0.499517	282	tags=29%, list=16%, signal=25%	P60033/P12644/O75923/Q13045/P27797/P58546/P05556/Q13547/P09493/P49747/P16615/P01137/P17813/P21291/P21926
M12343	GOBP_REGULATION_OF_SUBSTRATE_ADHESION_DEPENDENT_CELL_SPREADING	23	-0.517283	-1.52618	0.0365128	0.516594	0.499517	308	tags=43%, list=18%, signal=36%	P02647/P48059/P27797/P60953/Q13418/P63000/P07237/O15144/P60903/P09758
M14850	GOBP_REGULATION_OF_CELLULAR_RESPONSE_TO_STRESS	95	-0.348784	-1.37745	0.0377453	0.531139	0.513582	322	tags=27%, list=19%, signal=24%	Q9Y265/P23246/P00441/Q13263/P29590/P12644/P09211/O75832/P61978/P62937/P60953/Q03135/P54578/O76021/P04792/P61769/P07237/P29508/P28799/P16070/P51572/P16104/Q96QD8/P53801/Q04637/Q92905
M42620	GOBP_GLYCOSAMINOGLYCAN_CATABOLIC_PROCESS	10	-0.663697	-1.58671	0.0377998	0.531139	0.513582	103	tags=30%, list=6%, signal=28%	P01137/Q9Y5Y7/P16070
M10236	BORCZUK_MALIGNANT_MESOTHELIOMA_UP	121	-0.32063	-1.32552	0.0386876	0.541337	0.523442	494	tags=40%, list=29%, signal=31%	P11047/Q07955/Q9Y6Y8/P25705/P55209/Q04837/P62244/Q14683/Q8IV08/P28072/Q13200/Q00325/O75367/P10155/P13473/O75340/Q02750/P78527/P49368/Q93008/P11142/P27707/O15372/Q13637/Q15185/O00203/P50395/O43684/P22061/O60832/P27348/O75832/P48643/P0C0S5/Q16658/P21796/P53621/P63000/P16615/P01137/P48556/P62820/P06756/P07355/P62834/P31949/Q15836/Q92905/O14828
M9695	HOLLMANN_APOPTOSIS_VIA_CD40_UP	43	-0.423325	-1.44918	0.0387895	0.541337	0.523442	264	tags=26%, list=15%, signal=22%	Q9BQE3/P22061/Q13045/P68363/P05556/Q13547/O15144/P22090/P09497/Q16563/Q14699
M24615	GOBP_PROTEIN_LOCALIZATION_TO_PLASMA_MEMBRANE	59	-0.378979	-1.38141	0.0390471	0.541682	0.523776	350	tags=32%, list=20%, signal=27%	O75116/Q00610/P46459/Q13464/P60033/P05556/P17931/Q15172/Q15436/Q9BV40/Q12846/P54709/P01137/P60903/P61026/P62834/P51153/Q15836/Q8NG11
M16894	KEGG_COMPLEMENT_AND_COAGULATION_CASCADES	27	0.499018	1.5369	0.0390782	0.541682	0.523776	195	tags=41%, list=11%, signal=37%	P01009/P08697/P05121/P00742/P05156/P00750/P05546/P12259/P0C0L4/P01031/P01024
M39480	WP_BLOOD_CLOTTING_CASCADE	11	0.662874	1.62589	0.0396484	0.547736	0.529629	146	tags=45%, list=8%, signal=42%	P08697/P05121/P00742/P00750/P12259
M172	GRYDER_PAX3FOXO1_TOP_ENHANCERS	70	-0.361333	-1.36037	0.0399922	0.549157	0.531003	279	tags=30%, list=16%, signal=26%	P02462/Q92556/P50395/P61978/P05556/O43149/Q01844/P36543/O76021/Q16658/Q92499/P53621/Q8IWU5/P48556/O15144/P28799/Q9Y277/Q96QD8/P21291/P53801/P21926
M12957	GOBP_CELL_MATURATION	18	0.576654	1.5987	0.0400313	0.549157	0.531003	351	tags=39%, list=20%, signal=31%	Q9BQA1/P78423/P17302/P01024/P09622/O43286/P04062
M14831	GOBP_POSITIVE_REGULATION_OF_CHROMOSOME_ORGANIZATION	26	-0.499286	-1.50113	0.0401528	0.549157	0.531003	472	tags=62%, list=27%, signal=45%	Q04837/P22626/P12270/P50990/Q14103/O75367/P09651/P49368/P23246/P17987/Q13263/P29590/O60832/P48643/P50991/P40227
M27685	REACTOME_RRNA_PROCESSING	90	-0.357115	-1.4016	0.0406598	0.554243	0.535922	640	tags=53%, list=37%, signal=35%	P36578/P42677/P27635/P63173/P25398/P62266/P61254/P83731/P39019/P46783/P62979/P40429/P61513/O43818/P61247/P50914/P62277/P46776/P32969/Q969Q0/Q9UNX3/P62244/P46782/P62753/P05387/P62857/P62851/P62750/P78345/P62424/P08708/P46778/P62906/P49207/P46777/Q14137/O60832/P61927/P62841/P26373/P08865/P60866/Q02543/P47914/P62273/P62917/P18077/P22090
M12045	GOBP_LIPID_HOMEOSTASIS	20	0.537206	1.54281	0.0415471	0.562599	0.544002	275	tags=45%, list=16%, signal=38%	Q9BY76/Q8WTV0/Q9Y5X9/Q9NRY6/P06858/P17174/Q96D15/P01130/O95445
M27786	REACTOME_TRANSCRIPTIONAL_REGULATION_BY_RUNX1	64	-0.387773	-1.44095	0.0415471	0.562599	0.544002	424	tags=38%, list=24%, signal=29%	P28072/Q13200/P62191/P62195/P28065/P67870/P04908/P29590/Q969G3/P68400/O75832/P19784/P17931/Q13547/P0C0S5/Q16401/Q99460/Q16777/Q8N257/P48556/P07996/O00501/O00232/P16104
M22803	GOBP_SYNAPTIC_VESICLE_EXOCYTOSIS	11	-0.637419	-1.56398	0.0418578	0.564943	0.546268	440	tags=64%, list=25%, signal=48%	Q8N2Q7/P20339/P54920/Q12846/P16615/O00161/P62834
M12671	SENGUPTA_NASOPHARYNGEAL_CARCINOMA_DN	24	0.518526	1.56879	0.0422388	0.568216	0.549432	78	tags=17%, list=5%, signal=16%	P01833/P02788/Q9H9H4/P35237
M3019	ZHONG_RESPONSE_TO_AZACITIDINE_AND_TSA_UP	23	-0.507204	-1.49645	0.0426493	0.571863	0.552959	230	tags=26%, list=13%, signal=23%	P61421/P18085/P16403/Q5JRX3/P09497/P21926
M124	PID_CXCR4_PATHWAY	22	-0.52021	-1.52222	0.0429127	0.57352	0.554561	249	tags=45%, list=14%, signal=39%	P04899/P60953/P05556/P08631/P62873/P62745/P63000/P08648/O14964/P06756
M2259	KIM_GLIS2_TARGETS_UP	29	0.48147	1.51783	0.0430817	0.57391	0.554938	215	tags=24%, list=12%, signal=22%	Q9BY76/Q15063/P78423/P05121/Q01628/P01024/P08670
M15039	GOBP_ASPARTATE_FAMILY_AMINO_ACID_METABOLIC_PROCESS	12	0.631394	1.57504	0.0433572	0.575711	0.556679	365	tags=50%, list=21%, signal=40%	O00469/Q93088/Q00266/P17174/P30520/P11586
M12082	GOBP_POSITIVE_REGULATION_OF_BINDING	44	-0.413732	-1.42028	0.0435134	0.575921	0.556883	304	tags=32%, list=18%, signal=27%	Q13263/P07305/O15371/P12644/P60228/Q03135/P61769/P01137/P60903/O00501/P07355/P67775/Q03405/Q04637
M42654	GOBP_RIBONUCLEOSIDE_DIPHOSPHATE_METABOLIC_PROCESS	29	0.479165	1.51056	0.044254	0.583417	0.564131	338	tags=34%, list=20%, signal=28%	P27708/P09972/P17858/P00338/Q08043/P23921/Q01813/P06744/P36871/P04075
M7069	GOBP_RHO_PROTEIN_SIGNAL_TRANSDUCTION	25	-0.499151	-1.48773	0.0446483	0.583417	0.564131	350	tags=36%, list=20%, signal=29%	O75116/P02647/Q13464/Q92888/P60953/P05556/P62745/P63000/P55290
M15975	LIEN_BREAST_CARCINOMA_METAPLASTIC_VS_DUCTAL_UP	15	0.602216	1.59033	0.0447387	0.583417	0.564131	430	tags=53%, list=25%, signal=40%	O00469/Q9BY76/P08670/Q9UBR2/Q96TA1/P04156/Q01469/P26038
M10844	GOBP_RESPONSE_TO_ENDOPLASMIC_RETICULUM_STRESS	41	-0.427235	-1.44768	0.0447777	0.583417	0.564131	192	tags=32%, list=11%, signal=29%	Q14258/P29590/P27797/Q03135/P54578/P16615/P07237/Q8TCT9/P07996/P27824/P51572/Q04637/Q92905
M5275	OSMAN_BLADDER_CANCER_UP	89	-0.343231	-1.34498	0.0447907	0.583417	0.564131	409	tags=35%, list=24%, signal=28%	Q9NZ08/O75367/P10155/P07858/P30101/Q96CX2/P50552/O60684/O75533/Q92522/Q07666/Q9NUM4/P27797/Q9BRK5/P46063/Q01844/P17931/Q9UIQ6/P62873/Q9UQE7/P11387/P61106/Q16270/P61163/Q14697/P07237/P01137/P61026/P16070/Q08722/Q04637
M5316	MODY_HIPPOCAMPUS_PRENATAL	24	-0.496941	-1.4721	0.0454394	0.58592	0.566551	432	tags=50%, list=25%, signal=38%	Q13151/P62750/P08579/P04908/P07305/P49207/P61927/P26373/P62917/P20042/Q15029/P16104
M22563	GOBP_GLYCOPROTEIN_BIOSYNTHETIC_PROCESS	20	0.534675	1.53554	0.0457316	0.58592	0.566551	10	tags=10%, list=1%, signal=10%	O00469/Q9Y5P6
M14557	DORSEY_GAB2_TARGETS	10	-0.655617	-1.56739	0.0457575	0.58592	0.566551	113	tags=50%, list=7%, signal=47%	P05106/P12111/P07996/P16070/P07477
M27550	REACTOME_RHO_GTPASES_ACTIVATE_FORMINS	38	-0.43473	-1.43856	0.0457576	0.58592	0.566551	264	tags=32%, list=15%, signal=27%	Q9BQE3/O43684/P60953/P68363/Q14204/P05556/Q15172/P62745/P63167/P07737/P63000/P67775
M17742	SMITH_TERT_TARGETS_UP	34	-0.458028	-1.49883	0.0458227	0.58592	0.566551	318	tags=32%, list=18%, signal=27%	Q92522/P34897/O15118/Q15758/Q01844/P45973/P11387/Q16740/Q8N668/Q12904/P67775
M1774	GOBP_POSITIVE_REGULATION_OF_PROTEIN_METABOLIC_PROCESS	225	-0.281704	-1.25996	0.0459992	0.58592	0.566551	387	tags=27%, list=22%, signal=24%	P17948/P62191/O75340/Q02750/P78344/P78527/P62195/Q9GZX9/Q9NZH0/P67870/O75116/O15031/Q07666/Q13155/P46459/P29590/O15371/P68400/P60033/P46777/P12644/P60228/P16401/O75832/P58546/P62937/Q15172/Q969H8/Q03135/Q8IZP0/P29466/O75396/Q13418/Q9H0U4/P35232/P63000/P05106/Q92542/P01137/P17813/P29508/P08648/P62820/P07996/P60903/Q19T08/Q8N668/P07355/P28799/P16070/P67775/P62834/P50591/P53990/Q03405/Q6UXH8/P51572/…
M15247	KEGG_UBIQUITIN_MEDIATED_PROTEOLYSIS	21	0.543749	1.57182	0.046006	0.58592	0.566551	186	tags=29%, list=11%, signal=26%	Q9UNE7/Q13617/Q9C0C9/Q969T4/Q9UBT2/Q13616
M14411	GOBP_LAMELLIPODIUM_ORGANIZATION	23	-0.502553	-1.48272	0.0463312	0.58592	0.566551	229	tags=39%, list=13%, signal=34%	P60953/P05556/Q16658/Q8IZP0/Q9Y2A7/P63000/O15144/P16070/P55290
M7883	CUI_TCF21_TARGETS_UP	10	0.669956	1.59836	0.0473607	0.58592	0.566551	383	tags=50%, list=22%, signal=39%	Q9BY67/P21741/P13611/P36955/P12109
M16913	GOBP_POSITIVE_REGULATION_OF_CELL_MORPHOGENESIS_INVOLVED_IN_DIFFERENTIATION	25	-0.495553	-1.477	0.0476856	0.58592	0.566551	394	tags=44%, list=23%, signal=34%	P02679/P78527/P02647/P48059/P27797/P60953/Q13418/P63000/P07237/O15144/P60903
M8467	JISON_SICKLE_CELL_DISEASE_UP	47	-0.417233	-1.44858	0.0477147	0.58592	0.566551	309	tags=32%, list=18%, signal=27%	P78417/P07305/P27797/P48509/P09493/Q10589/Q9BV40/P14550/P05106/P07237/P68871/P07355/P12429/P51153/P21926
M9399	BOYLAN_MULTIPLE_MYELOMA_PCA1_UP	23	0.519657	1.55758	0.0484514	0.58592	0.566551	288	tags=43%, list=17%, signal=37%	Q96DA0/Q9H4L5/P02771/P02788/Q01628/P41091/P69905/P01024/Q9BZP6/P01040
M11828	GOBP_PROTEIN_LOCALIZATION_TO_LYSOSOME	14	-0.597735	-1.56093	0.0487329	0.58592	0.566551	401	tags=50%, list=23%, signal=39%	P13473/O75116/P11142/P60033/O00203/Q9P0V3/O14964
M41814	REACTOME_RHOH_GTPASE_CYCLE	14	-0.597325	-1.55986	0.0487329	0.58592	0.566551	430	tags=57%, list=25%, signal=43%	P55072/P02786/O75116/Q13464/Q15758/P68363/Q03135/Q15836
M27771	REACTOME_RAB_GERANYLGERANYLATION	18	-0.544178	-1.50671	0.0490196	0.58592	0.566551	290	tags=61%, list=17%, signal=51%	P61019/P20339/P61020/Q13637/Q15286/P61106/Q9H0U4/P62820/P61026/P51153/P51148
M14344	DASU_IL6_SIGNALING_UP	17	-0.558833	-1.52147	0.0494071	0.58592	0.566551	110	tags=24%, list=6%, signal=22%	P49327/P01137/P17813/Q08722
M156	PID_ECADHERIN_NASCENT_AJ_PATHWAY	19	-0.547015	-1.53639	0.049505	0.58592	0.566551	354	tags=47%, list=20%, signal=38%	P67870/P68400/P60953/P19784/Q8IZP0/Q9Y2A7/P35221/P63000/P62834
M17163	CAIRO_LIVER_DEVELOPMENT_UP	30	0.470728	1.48712	0.0496032	0.58592	0.566551	369	tags=33%, list=21%, signal=27%	O00469/Q99426/P17302/Q9NQP4/P21741/Q14141/Q9ULC0/P15374/P50454/P61812
M16622	GOBP_CELLULAR_METABOLIC_COMPOUND_SALVAGE	10	0.666348	1.58975	0.0499035	0.58592	0.566551	237	tags=50%, list=14%, signal=43%	P55263/Q93088/Q01433/P00492/P00813

## Sheet: 2% O2
ID	Description	setSize	enrichmentScore	NES	pvalue	p.adjust	qvalue	rank	leading_edge	core_enrichment
M27640	REACTOME_KERATINIZATION	29	0.872376	2.44026	1e-10	2.0515e-07	2.04947e-07	100	tags=62%, list=6%, signal=59%	P13646/Q7Z794/Q14533/P15924/P13647/P02538/Q8N1N4/P08779/P02533/P13645/P20930/P01040/P35527/P04264/P35908/Q08554/Q04695/P04259
M27649	REACTOME_FORMATION_OF_THE_CORNIFIED_ENVELOPE	29	0.872376	2.44026	1e-10	2.0515e-07	2.04947e-07	100	tags=62%, list=6%, signal=59%	P13646/Q7Z794/Q14533/P15924/P13647/P02538/Q8N1N4/P08779/P02533/P13645/P20930/P01040/P35527/P04264/P35908/Q08554/Q04695/P04259
M650	HOLLERN_SQUAMOUS_BREAST_TUMOR	24	0.819683	2.20091	4.7374e-07	0.000519866	0.000519353	82	tags=54%, list=5%, signal=52%	Q14533/P13647/P02538/P08779/P50453/P02533/P13645/Q86YZ3/P01040/P04264/Q9NZT1/Q08554/Q04695
M14065	GOBP_EPIDERMIS_DEVELOPMENT	54	0.682126	2.12974	5.06816e-07	0.000519866	0.000519353	185	tags=35%, list=11%, signal=32%	P15924/Q5D862/P13647/P08779/P02533/P13645/Q86YZ3/P20930/P01040/P35527/P35908/P31151/Q9NZT1/Q04695/Q13443/Q13510/P16615/P61812/Q13547
M10384	GOBP_INTERMEDIATE_FILAMENT_BASED_PROCESS	15	0.864361	2.06216	6.441e-06	0.00495128	0.00494639	82	tags=47%, list=5%, signal=45%	P13646/P15924/P08779/P02533/P35527/P35908/Q04695
M15889	GOBP_SKIN_DEVELOPMENT	55	0.654022	2.04838	7.24048e-06	0.00495128	0.00494639	185	tags=33%, list=11%, signal=30%	P15924/Q5D862/P08779/P13645/Q86YZ3/P20930/P01040/P35527/P04264/P35908/P31151/Q04695/P05997/Q13443/Q13510/P23229/P61812/Q13547
M29131	GOBP_KERATINOCYTE_DIFFERENTIATION	29	0.749787	2.09735	1.25962e-05	0.0073832	0.0073759	134	tags=38%, list=8%, signal=36%	P15924/P08779/P13645/Q86YZ3/P20930/P01040/P35908/P31151/Q04695/Q13443/Q13510
M10607	GOBP_INTERMEDIATE_FILAMENT_ORGANIZATION	10	0.902656	2.004	1.55211e-05	0.00796039	0.00795253	82	tags=70%, list=5%, signal=67%	P13646/P15924/P08779/P02533/P35527/P35908/Q04695
M10702	JAEGER_METASTASIS_DN	37	0.689729	2.03152	3.56889e-05	0.015187	0.015172	100	tags=41%, list=6%, signal=39%	P15924/P13647/P02538/P08779/P02533/P13645/P20930/P01040/P04264/P31151/Q09666/Q9NZT1/Q08554/Q04695/P04259
M12194	GOBP_EPIDERMAL_CELL_DIFFERENTIATION	36	0.681457	1.9898	3.70145e-05	0.015187	0.015172	134	tags=31%, list=8%, signal=29%	P15924/P08779/P13645/Q86YZ3/P20930/P01040/P35908/P31151/Q04695/Q13443/Q13510
M3672	TURASHVILI_BREAST_LOBULAR_CARCINOMA_VS_DUCTAL_NORMAL_DN	12	0.845668	1.95522	0.000110764	0.0404048	0.0403648	146	tags=58%, list=8%, signal=54%	P25311/P13647/P02533/Q04695/P04259/Q06481/Q9UGI8
M13283	HSIAO_LIVER_SPECIFIC_GENES	70	0.570662	1.84961	0.000118171	0.0404048	0.0403648	270	tags=34%, list=16%, signal=30%	Q15493/P25311/Q04756/P19827/P01009/P02656/P02675/P00742/P05121/P02787/P02748/P36955/P02679/P04004/P00734/P05156/Q93088/P19823/P0C0L4/Q16698/P12259/O00469/P03952/Q14624
M5493	WNT_SIGNALING	10	-0.83696	-2.01943	0.000178637	0.0554428	0.0553881	34	tags=20%, list=2%, signal=20%	O75581/P67775
M19768	LIN_SILENCED_BY_TUMOR_MICROENVIRONMENT	12	0.836797	1.93471	0.000189179	0.0554428	0.0553881	16	tags=33%, list=1%, signal=33%	P13646/Q14533/P25311/Q8N1N4
M13772	GOBP_WATER_HOMEOSTASIS	11	0.853647	1.9226	0.000251056	0.0686722	0.0686044	41	tags=45%, list=2%, signal=45%	Q5D862/P08779/Q86YZ3/P20930/P04264
M10944	GOBP_PEPTIDE_CROSS_LINKING	14	0.802478	1.89752	0.000404527	0.103736	0.103634	43	tags=43%, list=2%, signal=42%	P15924/P13645/P20930/P01040/P04264/P35908
M15372	GOBP_REGULATION_OF_CELL_CYCLE_PHASE_TRANSITION	40	-0.572554	-1.93233	0.000558022	0.13468	0.134547	353	tags=42%, list=20%, signal=35%	P05067/O00571/Q9Y6G9/P04083/Q7LG56/O75367/Q9NWV8/Q9UL46/O43684/Q8N7H5/Q13620/Q9UHI8/P29590/Q08J23/Q04637/P16104/P67775
M27660	REACTOME_MITOTIC_PROPHASE	26	-0.665336	-2.01378	0.000626854	0.142888	0.142747	44	tags=23%, list=3%, signal=23%	Q16777/Q01105/O75531/P16104/P28482/P67775
M27267	REACTOME_TRANSCRIPTIONAL_REGULATION_BY_TP53	52	-0.533636	-1.88156	0.000783529	0.169201	0.169034	384	tags=42%, list=22%, signal=34%	P19784/Q15370/P53611/Q16576/P00390/Q09028/P12004/Q7LG56/P27694/Q06830/P67870/Q04917/P29590/P62258/Q92696/Q92466/Q96S44/Q93009/P06744/P61981/Q16881/P67775
M1859	RHEIN_ALL_GLUCOCORTICOID_THERAPY_DN	140	-0.371071	-1.54394	0.000951108	0.190027	0.18984	487	tags=41%, list=28%, signal=32%	P42765/Q7L576/P12268/P52788/P68363/Q9NVA2/P28065/P49915/Q13867/P07195/Q14683/P68431/P09960/O76021/P51991/P30048/Q15005/P27824/P52209/Q09028/P12004/Q04446/P63167/P08237/Q16555/P21796/P27694/O00151/P40925/P50395/O95373/Q9BQE3/P48735/Q9BPX5/Q06830/P24752/P67870/P00505/P00338/P34897/P15531/P22061/Q07021/P35580/P05165/Q16836/P29401/P37837/P05388/P06744/P06733/P09486/P30566/P62316/Q01105/O00422/P51153/…
M13774	GOBP_HUMORAL_IMMUNE_RESPONSE	35	0.625928	1.81767	0.00100902	0.190027	0.18984	348	tags=51%, list=20%, signal=42%	P61626/P02538/P04264/P31151/P35232/P02675/P02787/P02748/Q9UGM3/P00734/P05156/P40306/P0C0L4/P62888/Q10588/P06702/P02788/P04003
M5588	HOFFMANN_LARGE_TO_SMALL_PRE_BII_LYMPHOCYTE_UP	28	-0.62406	-1.93571	0.00101891	0.190027	0.18984	247	tags=36%, list=14%, signal=31%	P27694/O14980/P04908/O00410/P45973/O43707/P00338/P06733/P16104/P67775
M27012	REACTOME_TOLL_LIKE_RECEPTOR_9_TLR9_CASCADE	14	-0.760228	-1.97256	0.00112924	0.193151	0.19296	5	tags=21%, list=0%, signal=22%	P05067/P28482/P67775
M4306	ONDER_CDH1_TARGETS_2_DN	52	0.567402	1.76728	0.00118485	0.193151	0.19296	100	tags=23%, list=6%, signal=22%	P13646/Q14533/P15924/P13647/P02538/P08779/P02533/P01040/P31151/P01009/Q04695/P04259
M17572	SMID_BREAST_CANCER_LUMINAL_B_DN	97	0.498853	1.68714	0.00121664	0.193151	0.19296	230	tags=25%, list=13%, signal=23%	Q14533/P61626/P13647/P02538/P08779/P02533/P31151/P01344/Q9NZT1/Q04695/O43175/Q9BY76/P04259/Q14019/Q969T4/Q86SQ4/P23229/Q05682/P53985/Q9ULC0/Q16666/P05156/Q08431/P26022
M14455	TANAKA_METHYLATED_IN_ESOPHAGEAL_CARCINOMA	13	0.790492	1.8538	0.00122396	0.193151	0.19296	43	tags=23%, list=2%, signal=23%	P13646/P04264/P35908
M8232	KEGG_LONG_TERM_DEPRESSION	11	-0.794597	-1.96255	0.0013322	0.202445	0.202245	5	tags=18%, list=0%, signal=18%	P28482/P67775
M29565	REACTOME_MYD88_INDEPENDENT_TLR4_CASCADE	12	-0.776487	-1.97161	0.00156029	0.223799	0.223578	5	tags=25%, list=0%, signal=25%	P05067/P28482/P67775
M27560	REACTOME_NEGATIVE_REGULATION_OF_MAPK_PATHWAY	12	-0.775482	-1.96906	0.00158181	0.223799	0.223578	5	tags=25%, list=0%, signal=25%	Q15172/P28482/P67775
M5370	FONTAINE_FOLLICULAR_THYROID_ADENOMA_DN	14	-0.744189	-1.93095	0.00182242	0.249247	0.249001	313	tags=71%, list=18%, signal=59%	Q09028/P27487/Q08722/P21796/P40925/P06703/Q07021/P06744/P60903/O75531
M7145	GOBP_ENDOTHELIAL_CELL_MIGRATION	64	-0.462736	-1.71812	0.00225903	0.298994	0.298699	414	tags=47%, list=24%, signal=37%	Q86T13/P12644/P42224/P28827/P62328/P04083/P35968/Q9BR76/P27487/O60462/P05106/P12429/P62745/O75340/P67870/P28799/P63000/P33151/Q13630/Q6UXH8/Q02763/Q12841/O00214/P06744/P09486/P42785/P19174/P27797/P55290/P51153
M10380	GOBP_ANTIMICROBIAL_HUMORAL_RESPONSE	13	0.772193	1.81088	0.00249135	0.318313	0.317998	327	tags=77%, list=19%, signal=63%	P61626/P02538/P31151/P02675/P02787/Q9UGM3/P00734/P62888/P06702/P02788
M1676	SHEN_SMARCA2_TARGETS_DN	11	0.80774	1.81921	0.00256016	0.318313	0.317998	285	tags=73%, list=16%, signal=61%	P01266/Q10570/P02675/P02787/Q00266/Q92945/O60610/P23142
M164	PID_ERBB1_DOWNSTREAM_PATHWAY	34	-0.56939	-1.87982	0.00273608	0.33018	0.329854	151	tags=26%, list=9%, signal=25%	Q04917/P63000/P18085/P62258/P17655/O15144/P61981/P28482/P67775
M8467	JISON_SICKLE_CELL_DISEASE_UP	47	-0.508869	-1.75418	0.00324993	0.380984	0.380608	288	tags=36%, list=17%, signal=31%	P48509/P46926/P53004/Q9UL46/P05106/P12429/P07355/Q06830/P07237/Q04917/P02751/P37837/Q16881/P13473/P27797/P51153/P21926
M9016	PROVENZANI_METASTASIS_DN	45	0.564594	1.72217	0.00382316	0.424522	0.424103	219	tags=24%, list=13%, signal=22%	P13646/Q14533/P13647/P02792/P53680/P05121/P05198/Q14019/P09758/O15460/P31431
M17093	GOBP_MEIOTIC_CELL_CYCLE	20	-0.643892	-1.83307	0.00399642	0.424522	0.424103	247	tags=35%, list=14%, signal=30%	P27694/O43684/P61160/Q08J23/P27797/P16104/P67775
M1090	REACTOME_SIGNALING_BY_FGFR	15	-0.709004	-1.85356	0.00403519	0.424522	0.424103	43	tags=20%, list=2%, signal=20%	P19174/P28482/P67775
M39642	WP_PHYSICOCHEMICAL_FEATURES_AND_TOXICITYASSOCIATED_PATHWAYS	15	-0.708675	-1.8527	0.00403519	0.424522	0.424103	232	tags=40%, list=13%, signal=35%	P61160/P07737/P02751/P19174/P28482/P67775
M186	PID_PDGFRB_PATHWAY	43	-0.499444	-1.707	0.00436756	0.436853	0.436422	411	tags=47%, list=24%, signal=36%	P27348/O15511/P06756/P42224/P61158/Q8N1I0/P08631/Q01995/P05106/P61160/O43707/Q04917/P63000/P62258/O15144/P61981/P62834/P19174/P28482/P67775
M13282	GOBP_REGULATION_OF_CELL_CYCLE_G1_S_PHASE_TRANSITION	20	-0.640173	-1.82249	0.0043793	0.436853	0.436422	243	tags=45%, list=14%, signal=39%	O00571/P04083/Q9UL46/Q8N7H5/Q13620/Q9UHI8/P29590/Q04637/P67775
M27531	REACTOME_SIGNALING_BY_FGFR2	14	-0.714969	-1.85513	0.00447181	0.436853	0.436422	43	tags=21%, list=2%, signal=21%	P19174/P28482/P67775
M2642	KEGG_TGF_BETA_SIGNALING_PATHWAY	20	-0.634662	-1.8068	0.00485791	0.450308	0.449863	5	tags=15%, list=0%, signal=15%	P22004/P28482/P67775
M39387	WP_WNT_SIGNALING_PATHWAY_AND_PLURIPOTENCY	12	-0.740978	-1.88144	0.00491198	0.450308	0.449863	34	tags=17%, list=2%, signal=16%	O75581/P67775
M12005	GOBP_POSITIVE_REGULATION_OF_ENDOTHELIAL_CELL_MIGRATION	33	-0.563916	-1.85417	0.00493879	0.450308	0.449863	340	tags=52%, list=20%, signal=42%	P62328/P04083/P35968/O60462/P05106/P12429/P62745/O75340/P28799/P63000/Q13630/Q6UXH8/Q02763/P06744/P09486/P19174/P27797
M261	PID_P53_REGULATION_PATHWAY	10	-0.754053	-1.81939	0.00526022	0.453345	0.452897	89	tags=20%, list=5%, signal=19%	Q93009/P67775
M18134	COLDREN_GEFITINIB_RESISTANCE_UP	16	-0.684759	-1.82837	0.0052976	0.453345	0.452897	159	tags=31%, list=9%, signal=29%	P17812/P00352/P36405/P09936/Q9HBI1
M13944	GOZGIT_ESR1_TARGETS_UP	22	0.657264	1.71728	0.00530358	0.453345	0.452897	356	tags=50%, list=21%, signal=40%	P13647/P02533/Q99715/Q9H8L6/P05121/P04004/P11047/P07942/P15144/P49321/Q96CX2
M39323	WP_B_CELL_RECEPTOR_SIGNALING_PATHWAY	10	-0.74529	-1.79825	0.00602999	0.504919	0.504421	146	tags=60%, list=8%, signal=55%	P60953/P63000/P46109/Q12905/P19174/P28482
M43009	GOBP_REGULATION_OF_MITOTIC_CELL_CYCLE_PHASE_TRANSITION	30	-0.568986	-1.80114	0.00624762	0.51268	0.512173	353	tags=43%, list=20%, signal=35%	P05067/O00571/Q9Y6G9/P04083/Q7LG56/Q9NWV8/Q9UL46/O43684/Q13620/Q9UHI8/P29590/Q04637/P67775
M16235	GOBP_REGULATION_OF_BODY_FLUID_LEVELS	78	0.480572	1.58253	0.00692547	0.55716	0.55661	186	tags=22%, list=11%, signal=20%	Q5D862/P08779/Q86YZ3/P20930/Q04756/P04264/P01009/P02675/P00742/P07741/P35670/P05121/P21291/P40189/P02679/P04004/P00734
M27287	REACTOME_TRANSPORT_OF_SMALL_MOLECULES	131	0.440012	1.53752	0.007489	0.590911	0.590327	189	tags=21%, list=11%, signal=20%	P25311/P02794/P02792/P53680/P10644/P35232/P02656/P30519/P35670/P36404/P02787/Q9BY76/P05198/Q15758/Q8NE71/P63010/Q93050/O00233/P16615/P41091/P21399/P31025/P53985/P13861/P55011/O15118/P20042
M16373	GOBP_TRNA_PROCESSING	10	-0.73502	-1.77347	0.00765507	0.591082	0.590499	102	tags=30%, list=6%, signal=28%	Q96S44/Q08J23/Q92499
M27013	REACTOME_TOLL_LIKE_RECEPTOR_TLR1_TLR2_CASCADE	16	-0.670414	-1.79006	0.0077793	0.591082	0.590499	12	tags=19%, list=1%, signal=19%	P05109/P28482/P67775
M2777	AMIT_SERUM_RESPONSE_240_MCF10A	14	0.732319	1.73162	0.00798431	0.594076	0.593489	100	tags=36%, list=6%, signal=34%	P02538/Q02952/P05121/Q9BY76/P04259
M509	REACTOME_DEVELOPMENTAL_BIOLOGY	289	0.368053	1.38818	0.00815567	0.594076	0.593489	268	tags=16%, list=15%, signal=16%	P13646/Q7Z794/Q14533/P15924/P13647/P02538/Q8N1N4/P08779/P02533/P13645/P20930/P01040/P35527/P53680/P04264/P35908/P26232/P04156/P50570/Q08554/Q04695/Q9BY76/Q9H4B7/P05997/P04259/Q86SQ4/P63010/O00233/O75051/P13861/P62910/Q13509/P59998/P23528/P68366/P40123/Q13617/P0C0S5/P40306/Q02413/P62888/O43242/P27361/P61586/P11047/P31944/P07942
M916	REACTOME_PLATELET_HOMEOSTASIS	16	-0.667134	-1.7813	0.008352	0.594076	0.593489	26	tags=12%, list=2%, signal=12%	O00408/P67775
M39662	WP_TNFALPHA_SIGNALING_PATHWAY	11	-0.740499	-1.82893	0.00843248	0.594076	0.593489	177	tags=36%, list=10%, signal=33%	P07900/P63000/P28482/P67775
M16817	KEGG_OOCYTE_MEIOSIS	24	-0.58936	-1.75383	0.00854264	0.594076	0.593489	151	tags=21%, list=9%, signal=19%	Q04917/P62258/P61981/P28482/P67775
M3008	NABA_ECM_GLYCOPROTEINS	53	0.503888	1.56575	0.00892177	0.598983	0.598391	409	tags=51%, list=24%, signal=40%	P02675/Q9H8L6/Q96CG8/O43854/P02679/Q92626/P04004/Q9NT22/Q9UGM3/P35555/Q16363/Q08431/Q16270/Q9NZV1/Q6PCB0/P11047/P07942/P49746/P23142/Q7Z7G0/Q9HB63/O60687/O00468/P24043/O95967/Q9GZM7/O15230
M9372	KAUFFMANN_DNA_REPLICATION_GENES	24	-0.586024	-1.7439	0.00905417	0.598983	0.598391	36	tags=12%, list=2%, signal=12%	Q01105/P63241/P67775
M16894	KEGG_COMPLEMENT_AND_COAGULATION_CASCADES	27	0.618507	1.71841	0.00916396	0.598983	0.598391	390	tags=56%, list=23%, signal=44%	P01009/P02675/P00742/P05121/P02748/P02679/P00734/P05156/P0C0L4/P12259/P03952/P00488/P04003/P00749/P08174
M2377	IKEDA_MIR133_TARGETS_UP	10	-0.725125	-1.74959	0.00919715	0.598983	0.598391	411	tags=70%, list=24%, signal=54%	P27348/O15511/P61158/O00571/P60953/Q13596/P67775
M2573	LIM_MAMMARY_STEM_CELL_UP	83	0.473259	1.57367	0.00991503	0.626142	0.625523	517	tags=48%, list=30%, signal=36%	P13647/P08779/P02533/Q04756/P04156/Q99715/P05997/Q15758/Q5U651/P36955/P23229/P16615/P40189/Q05682/Q9UGI8/O75051/Q9BY67/Q06828/P11047/P07942/Q7Z7G0/P09382/Q9NQS3/Q9NR12/O14786/P40261/Q9GZM7/O94855/Q92743/P09543/Q9UBP4/Q96D15/P08670/Q9BUF5/P43121/P10124/P47929/P08572/O95810/Q01469
M34019	BLANCO_MELO_COVID19_SARS_COV_2_INFECTION_A594_ACE2_EXPRESSING_CELLS_RUXOLITINIB_DN	23	0.634092	1.68463	0.0100067	0.626142	0.625523	243	tags=43%, list=14%, signal=38%	Q9NRN5/Q96AQ6/P35232/P02675/P02787/Q06481/P02679/P05156/P40306/P15121
M12353	FONTAINE_PAPILLARY_THYROID_CARCINOMA_UP	16	-0.658138	-1.75729	0.010072	0.626142	0.625523	313	tags=69%, list=18%, signal=57%	Q09028/P27487/Q08722/O15031/O00151/P18206/P06703/Q12905/P35221/P60903/P08962
M980	KEGG_TRYPTOPHAN_METABOLISM	10	-0.714785	-1.72464	0.0105724	0.643754	0.643118	181	tags=50%, list=10%, signal=45%	P24752/P05091/P30084/Q16836/P40939
M12514	GOBP_DEFENSE_RESPONSE_TO_OTHER_ORGANISM	130	0.420256	1.47014	0.0108161	0.643754	0.643118	250	tags=23%, list=14%, signal=21%	P61626/P02538/P08779/P50453/O00743/P19367/P04264/P31151/P23246/P35232/P02675/Q08211/P05121/Q9NV70/P02787/P02748/P17405/Q14019/Q14166/Q14457/Q9UGM3/P00734/Q9BY67/Q16666/P05156/P0C0L4/P26022/P62888/Q9NPH3/P27361
M1134	DARWICHE_PAPILLOMA_RISK_LOW_DN	23	0.630619	1.6754	0.010826	0.643754	0.643118	120	tags=26%, list=7%, signal=25%	P61626/P35908/P36404/Q5U651/Q07955/P05452
M27921	REACTOME_NONSENSE_MEDIATED_DECAY_NMD	85	-0.389747	-1.51128	0.011769	0.684815	0.684139	82	tags=6%, list=5%, signal=6%	Q9Y3U8/P05388/P05387/Q04637/P67775
M7494	REACTOME_TOLL_LIKE_RECEPTOR_CASCADES	23	-0.578574	-1.69589	0.0118976	0.684815	0.684139	12	tags=13%, list=1%, signal=13%	P05109/P28482/P67775
M11355	KEGG_TIGHT_JUNCTION	33	-0.538881	-1.77185	0.0120172	0.684815	0.684139	384	tags=45%, list=22%, signal=36%	Q9UDY2/P19784/Q96A65/O60645/P60953/P12814/Q08043/Q9UKX2/P67870/O43707/P35221/P35580/P62070/P51153/P67775
M12556	GOBP_MESENCHYMAL_CELL_DIFFERENTIATION	46	-0.463493	-1.58828	0.0125768	0.695293	0.694606	317	tags=28%, list=18%, signal=24%	P17844/Q9UBV8/P60953/O60462/P08133/Q16394/O75340/Q9NS98/P02751/P29508/O75581/P28482/P67775
M16066	SPIELMAN_LYMPHOBLAST_EUROPEAN_VS_ASIAN_DN	150	-0.327641	-1.37429	0.0126102	0.695293	0.694606	435	tags=35%, list=25%, signal=29%	O00203/P50991/Q99519/P27348/P14678/O15511/Q93034/P22059/Q9NQW7/P30048/P35606/O14828/P62873/P20340/Q9UKK3/P54578/Q13610/Q96QD8/P55084/Q00610/P21796/P11234/P41250/P61160/P50395/Q9NRA2/O95373/Q15020/O00410/Q13620/P62745/O75340/P07355/P46459/Q9BPX5/P50897/O00232/P33240/P18085/P12955/P61758/P13598/P50591/Q15459/Q08257/P40939/Q16881/P42785/O95747/P08962/Q12904/Q13439/O75533
M6906	SENESE_HDAC2_TARGETS_DN	22	0.622847	1.62736	0.0127095	0.695293	0.694606	388	tags=55%, list=22%, signal=43%	Q14533/P02533/Q9NRN5/Q04695/P05997/P40123/Q16270/P50895/P02452/Q9HB63/Q92769/O95967
M29829	REACTOME_DISEASES_OF_PROGRAMMED_CELL_DEATH	22	-0.60271	-1.75691	0.0132784	0.703656	0.702961	464	tags=64%, list=27%, signal=47%	P84243/P62805/P68431/P05067/Q16576/Q09028/P04908/Q06830/P62258/P17655/Q07021/P04632/Q16777/P16104
M4086	KEGG_PROPANOATE_METABOLISM	11	-0.717776	-1.77281	0.0133713	0.703656	0.702961	181	tags=82%, list=10%, signal=74%	P30837/P49189/P07195/P24752/P00338/P05091/P05165/P30084/P40939
M14134	TURASHVILI_BREAST_DUCTAL_CARCINOMA_VS_DUCTAL_NORMAL_DN	28	0.58973	1.63684	0.0134062	0.703656	0.702961	100	tags=29%, list=6%, signal=27%	P13647/P08779/P02533/P01009/O95969/Q04695/P02787/P04259
M2103	STAMBOLSKY_RESPONSE_TO_VITAMIN_D3_UP	13	0.712442	1.67076	0.0136123	0.703656	0.702961	204	tags=38%, list=12%, signal=34%	O43815/P31151/Q08211/P04004/Q9BY67
M10268	GOBP_EPITHELIUM_DEVELOPMENT	181	0.392534	1.42864	0.0137198	0.703656	0.702961	185	tags=16%, list=11%, signal=16%	P13646/P15924/Q5D862/P02538/P08779/P02533/P13645/Q86YZ3/P20930/P01040/P35527/P35908/P31151/P16152/Q9H8L6/Q04695/P05121/Q96CG8/O43175/Q5U651/Q13443/Q13510/P40189/P21741/O75051/P61812/P09758/Q9UGM3/Q13547
M12016	OUELLET_OVARIAN_CANCER_INVASIVE_VS_LMP_UP	50	-0.44263	-1.53994	0.0139569	0.704101	0.703406	171	tags=26%, list=10%, signal=24%	Q08722/P40925/Q9UKM9/P67870/P00338/P18085/P35221/P67936/P50591/P06744/P54709/Q92905/P21926
M2700	SMID_BREAST_CANCER_RELAPSE_IN_BONE_DN	53	0.488926	1.51926	0.0141119	0.704101	0.703406	230	tags=26%, list=13%, signal=24%	Q14533/P13647/P02538/P08779/P02533/Q04695/O43175/P04259/P23229/P53985/Q16666/Q08431/Q02413/P26022
M19529	RODRIGUES_THYROID_CARCINOMA_ANAPLASTIC_DN	57	0.503956	1.57868	0.0142433	0.704101	0.703406	293	tags=28%, list=17%, signal=24%	P25311/O00743/Q96AQ6/P10644/Q02952/Q9H8L6/O75131/P21291/Q13510/Q9UGM3/P43251/Q06828/Q16270/Q00577/P50895/Q7Z7G0
M42527	REACTOME_DEFECTIVE_INTRINSIC_PATHWAY_FOR_APOPTOSIS	11	-0.709559	-1.75251	0.0149042	0.721479	0.720766	183	tags=55%, list=11%, signal=49%	P05067/Q06830/P62258/P17655/Q07021/P04632
M5549	TURASHVILI_BREAST_LOBULAR_CARCINOMA_VS_LOBULAR_NORMAL_UP	18	0.663957	1.65555	0.0152786	0.721479	0.720766	129	tags=44%, list=7%, signal=42%	P25311/P13647/O00743/P02533/P01009/Q04695/Q06481/Q96QK1
M17386	REACTOME_COSTIMULATION_BY_THE_CD28_FAMILY	10	-0.702964	-1.69612	0.0153857	0.721479	0.720766	2	tags=20%, list=0%, signal=20%	P63000/P67775
M34031	DESERT_PERIPORTAL_HEPATOCELLULAR_CARCINOMA_SUBCLASS_UP	18	0.662707	1.65243	0.0155231	0.721479	0.720766	339	tags=50%, list=20%, signal=41%	Q15493/P25311/P01040/P02748/Q93088/P03952/Q14624/P02647/P15144
M39691	WP_BRAINDERIVED_NEUROTROPHIC_FACTOR_BDNF_SIGNALING_PATHWAY	31	-0.507393	-1.62533	0.0155556	0.721479	0.720766	55	tags=13%, list=3%, signal=13%	P62834/P19174/P28482/P67775
M16602	GOBP_NEURAL_CREST_CELL_DIFFERENTIATION	19	-0.600804	-1.68226	0.0160339	0.721479	0.720766	304	tags=53%, list=18%, signal=44%	Q9UBV8/P60953/O60462/P08133/Q16394/O75340/Q9NS98/P02751/O75581/P28482
M14932	GOBP_MESENCHYME_DEVELOPMENT	51	-0.451027	-1.56251	0.0164694	0.721479	0.720766	317	tags=27%, list=18%, signal=23%	P17844/Q9UBV8/P60953/O60462/P08133/Q16394/O75340/Q9NS98/P68032/P02751/P29508/O75581/P28482/P67775
M14851	GOBP_POSITIVE_REGULATION_OF_EPITHELIAL_CELL_MIGRATION	43	-0.452265	-1.54575	0.016613	0.721479	0.720766	340	tags=42%, list=20%, signal=34%	P62328/P04083/P35968/O60462/P05106/P12429/P62745/O75340/P07737/P28799/P63000/Q13630/Q6UXH8/Q02763/P06744/P09486/P19174/P27797
M286	PID_TGFBR_PATHWAY	15	-0.646364	-1.6898	0.0166774	0.721479	0.720766	134	tags=20%, list=8%, signal=19%	P29590/P62258/P67775
M5889	NABA_MATRISOME	196	0.377338	1.38379	0.0167096	0.721479	0.720766	396	tags=38%, list=23%, signal=33%	Q5D862/P50453/Q86YZ3/P20930/Q04756/P01040/P19827/P31151/P01344/P01009/P02675/Q99715/P00742/Q9H8L6/P05121/Q96CG8/Q9BY76/P05997/Q13443/P36955/P05452/O43854/P02679/P21741/Q08629/Q92626/O75051/P61812/P04004/Q9NT22/Q9UGM3/Q9NTU7/P00734/P50452/Q9ULC0/O15460/Q06828/P08123/P35555/P19823/P31431/Q16363/Q08431/Q16270/Q9NQ30/Q9NZV1/Q6PCB0/P11047/O00469/P07942/Q14624/P49746/P02452/P23142/P78423/Q6UX71/Q7Z7G0/…
M7455	REACTOME_INTRINSIC_PATHWAY_FOR_APOPTOSIS	13	-0.676987	-1.73397	0.016811	0.721479	0.720766	151	tags=54%, list=9%, signal=50%	P63167/Q04917/P62258/Q07021/P61981/P30419/P28482
M3	GOBP_EPITHELIAL_CELL_DIFFERENTIATION	115	0.421129	1.45007	0.0172624	0.721479	0.720766	143	tags=15%, list=8%, signal=15%	P13646/P15924/P08779/P02533/P13645/Q86YZ3/P20930/P01040/P35527/P35908/P31151/P16152/Q04695/P05121/Q13443/Q13510/P40189
M5884	NABA_CORE_MATRISOME	77	0.46036	1.51411	0.017324	0.721479	0.720766	413	tags=45%, list=24%, signal=36%	P02675/Q99715/Q9H8L6/Q96CG8/P05997/O43854/P02679/Q08629/Q92626/P04004/Q9NT22/Q9UGM3/Q06828/P08123/P35555/Q16363/Q08431/Q16270/Q9NQ30/Q9NZV1/Q6PCB0/P11047/P07942/P49746/P02452/P23142/Q7Z7G0/Q9HB63/O60687/O00468/P24043/O95967/Q9GZM7/O15230/Q92954
M2248	BRUINS_UVC_RESPONSE_EARLY_LATE	34	-0.504342	-1.66507	0.0175623	0.721479	0.720766	302	tags=35%, list=17%, signal=30%	Q96G03/Q9NT62/Q16740/P12429/O00161/Q9NZL9/P34897/P05388/P62070/O75531/P07477/P28482
M5583	REACTOME_MRNA_SPLICING_MINOR_PATHWAY	19	-0.595801	-1.66825	0.0175887	0.721479	0.720766	109	tags=26%, list=6%, signal=25%	Q13435/Q9Y333/Q15427/P62316/O75533
M27080	REACTOME_RHO_GTPASE_EFFECTORS	92	-0.368444	-1.45289	0.0176211	0.721479	0.720766	237	tags=21%, list=14%, signal=19%	O43684/P61160/O14980/P04908/P62745/Q9BQE3/P07737/Q04917/P63000/P62258/P35221/P35580/O15144/P61981/Q16777/P16104/P05109/P28482/P67775
M2356	KOINUMA_TARGETS_OF_SMAD2_OR_SMAD3	172	0.395299	1.43539	0.0177396	0.721479	0.720766	198	tags=17%, list=11%, signal=17%	P13646/P15924/P13647/P02538/P02533/Q92572/Q9UHD8/Q09666/Q9H4L5/Q9BUJ2/P04156/Q99715/P55263/Q04695/P05121/P05198/Q9H444/Q15056/P60981/Q14019/Q96QK1/O43854/Q9UNZ2/Q05682/Q9UGI8/P31943/O75051/P50452/O15118/P54577
M39649	WP_COMPLEMENT_AND_COAGULATION_CASCADES	23	0.612811	1.62809	0.01776	0.721479	0.720766	269	tags=43%, list=16%, signal=37%	P01009/P02675/P00742/P05121/P02748/P00734/P05156/P0C0L4/P12259/P03952
M48	PID_MET_PATHWAY	18	-0.615124	-1.71469	0.0180364	0.725524	0.724807	146	tags=39%, list=8%, signal=36%	P63000/P46109/P35221/O14964/P62834/P19174/P28482
M10755	GOBP_TRANSITION_METAL_ION_TRANSPORT	12	0.704147	1.62802	0.0183114	0.729432	0.728712	91	tags=42%, list=5%, signal=40%	P02794/P02792/P50570/P35670/P02787
M16858	OSMAN_BLADDER_CANCER_DN	90	-0.367945	-1.44256	0.0190155	0.750196	0.749455	247	tags=17%, list=14%, signal=15%	P27694/P63173/P16403/O15294/Q15020/P39060/Q02543/P29590/Q93009/Q15459/Q9Y3U8/P05388/P05387/Q9BRX8/P67775
M5669	KEGG_NATURAL_KILLER_CELL_MEDIATED_CYTOTOXICITY	13	-0.667654	-1.71006	0.0204176	0.797841	0.797053	146	tags=38%, list=8%, signal=35%	P63000/P13598/P50591/P19174/P28482
M4780	WANG_SMARCE1_TARGETS_DN	68	-0.401251	-1.50167	0.0206615	0.799757	0.798967	174	tags=21%, list=10%, signal=19%	Q9HAV7/P17812/Q9UHI8/P34932/Q07021/Q16836/O75608/P61221/Q9BXJ9/P62070/P09936/Q12904/P05109/P21926
M24772	GOBP_SUPRAMOLECULAR_FIBER_ORGANIZATION	170	0.380473	1.37796	0.0213772	0.819725	0.818915	286	tags=22%, list=17%, signal=21%	P13646/P15924/P08779/P02533/P49407/P35527/P35908/P10644/P26232/Q99715/Q04695/P36404/P02787/P21291/P05997/P60981/Q14019/Q05682/Q92626/P61812/P09758/P59998/P23528/Q9Y2A7/Q06828/P08123/P31431/Q9NQP4/P84095/Q93008/P58546/P61586/P0DMV9/O60610/Q14203/P02452/O60925/P78423
M5652	FARMER_BREAST_CANCER_BASAL_VS_LULMINAL	48	0.510321	1.5706	0.0218418	0.827355	0.826538	230	tags=25%, list=13%, signal=22%	P02538/P08779/Q09666/P10644/P04156/P35670/O43175/P04259/P40189/P53985/O96019/P26022
M12004	SENESE_HDAC1_AND_HDAC2_TARGETS_DN	37	0.537033	1.58177	0.022091	0.827355	0.826538	233	tags=32%, list=13%, signal=29%	Q14533/P02533/Q9NRN5/Q04695/P05997/P60981/O43854/Q05682/P61812/Q13547/P40123/Q16270
M14202	GOBP_REGULATION_OF_ENDOCYTOSIS	47	0.50731	1.56298	0.0222345	0.827355	0.826538	174	tags=26%, list=10%, signal=24%	Q9P2R3/P49407/P53680/P02656/P50570/P05121/P02787/P17405/Q9UHD9/P63010/P61020/P04004
M2466	DELACROIX_RAR_BOUND_ES	54	-0.441775	-1.57467	0.0225831	0.827355	0.826538	321	tags=41%, list=19%, signal=34%	Q8IWU5/P07195/P12644/P07339/P00390/P61026/Q9UBV8/Q6UWH4/O00151/P16403/O43707/P18085/O75954/P02751/P04632/Q16836/Q6NY19/P61981/Q9H1C7/Q01105/P27797/Q9HBI1
M13186	MCBRYAN_PUBERTAL_BREAST_3_4WK_UP	40	0.519109	1.54572	0.0225844	0.827355	0.826538	261	tags=30%, list=15%, signal=26%	P15924/P02533/P19367/P01009/Q9BVC6/Q93050/P02679/P55011/P09758/Q08431/P53396/P0DMV9
M6467	REACTOME_OPIOID_SIGNALLING	18	-0.60608	-1.68948	0.0228248	0.82791	0.827092	5	tags=17%, list=0%, signal=17%	P31323/P28482/P67775
M39456	WP_RAC1PAK1P38MMP2_PATHWAY	12	-0.676982	-1.71895	0.0230031	0.82791	0.827092	146	tags=33%, list=8%, signal=31%	P63000/P02751/Q02763/P28482
M18550	BHATI_G2M_ARREST_BY_2METHOXYESTRADIOL_UP	28	-0.522261	-1.61995	0.0236807	0.841482	0.840651	339	tags=50%, list=20%, signal=41%	P04083/P08631/P12004/P16403/P04908/P07900/Q13185/P17812/P22061/P02786/P09486/P27797/Q9UHG3/P28482
M16864	REACTOME_METABOLISM_OF_CARBOHYDRATES	79	-0.372414	-1.43404	0.0237904	0.841482	0.840651	344	tags=29%, list=20%, signal=24%	P52209/P04075/P07686/P51688/Q96G03/Q04446/P46926/P09972/P08237/Q16394/P54802/P40925/Q9NTJ4/P00505/P00352/P15586/P29401/P37837/P06865/P06744/O43286/P06733/P67775
M600	REACTOME_G_ALPHA_I_SIGNALLING_EVENTS	26	-0.539163	-1.63189	0.0243696	0.854603	0.853759	5	tags=23%, list=0%, signal=23%	P05067/P62873/P04083/P31323/P28482/P67775
M15896	MARTINEZ_RB1_AND_TP53_TARGETS_UP	119	0.402422	1.39173	0.0250578	0.862815	0.861963	199	tags=17%, list=11%, signal=16%	Q7Z794/P61626/P08779/P50453/P02794/Q9NUM4/P01344/P50570/Q9BVC6/P02787/Q15758/Q15056/P36955/P63010/P16615/P40189/P21399/P61812/Q08380/P68366
M19428	KEGG_WNT_SIGNALING_PATHWAY	18	-0.60127	-1.67607	0.0251265	0.862815	0.861963	162	tags=22%, list=9%, signal=20%	P67870/P63000/O75581/P67775
M15770	GOBP_CELL_KILLING	32	0.543288	1.55763	0.0253518	0.862815	0.861963	237	tags=25%, list=14%, signal=22%	P61626/P25311/P50453/P02748/P61812/P00734/Q9BY67/P62888
M2080	KARLSSON_TGFB1_TARGETS_UP	56	-0.407385	-1.45994	0.0254449	0.862815	0.861963	373	tags=39%, list=22%, signal=32%	O76021/P48147/P61158/P09493/P19338/P12814/P54687/Q16394/P41250/Q14694/O00410/P07355/Q9BQA1/Q9NX58/P34897/P67936/Q08J23/P61221/Q9BXJ9/Q04637/Q01105/P63241
M19128	HELLEBREKERS_SILENCED_DURING_TUMOR_ANGIOGENESIS	31	0.555212	1.58357	0.0263495	0.886163	0.885288	331	tags=39%, list=19%, signal=32%	P02794/Q9NRN5/O43854/Q13510/P09758/Q9BY67/P35555/P31431/Q16270/Q7Z7G0/P10321/Q14517
M13449	CAIRO_HEPATOBLASTOMA_DN	31	0.552752	1.57655	0.0267923	0.893731	0.892848	420	tags=52%, list=24%, signal=40%	P25311/Q04756/P55263/P05121/Q00266/P02748/Q9BY76/P50452/Q9NPH3/Q14624/P04278/O95497/P40261/Q92954/P17174/P00966
M14307	GOBP_CELLULAR_ALDEHYDE_METABOLIC_PROCESS	16	-0.613521	-1.63815	0.0271839	0.897758	0.896871	294	tags=44%, list=17%, signal=37%	P22004/P48735/O75874/P00352/P05091/P29401/P37837
M39480	WP_BLOOD_CLOTTING_CASCADE	11	0.732839	1.65051	0.0274085	0.897758	0.896871	269	tags=64%, list=16%, signal=54%	P02675/P00742/P05121/P02679/P00734/P12259/P03952
M39591	WP_ENDODERM_DIFFERENTIATION	16	-0.612463	-1.63533	0.0275695	0.897758	0.896871	379	tags=56%, list=22%, signal=44%	P42224/P05067/Q16394/Q8N7H5/Q13620/P15531/Q07021/Q86VP6/Q9BXJ9
M9331	YAUCH_HEDGEHOG_SIGNALING_PARACRINE_DN	14	0.681816	1.6122	0.0281901	0.91074	0.909841	371	tags=50%, list=21%, signal=40%	P01009/Q99715/Q96M83/P11217/Q9BZP6/O95445/Q9NQS3
M373	VILLANUEVA_LIVER_CANCER_KRT19_DN	12	0.683665	1.58066	0.0289732	0.928492	0.927575	93	tags=25%, list=5%, signal=24%	Q15493/P16152/P02748
M2234	BHAT_ESR1_TARGETS_VIA_AKT1_UP	27	0.575078	1.59775	0.0302056	0.928492	0.927575	149	tags=22%, list=9%, signal=21%	P13646/Q9NRN5/Q9UHD8/P05198/Q9UQ80/Q9Y265
M17363	KIM_LRRC3B_TARGETS	13	0.679112	1.5926	0.0304274	0.928492	0.927575	93	tags=31%, list=5%, signal=29%	P61626/P02794/P01009/P02748
M10180	GOBP_HEMATOPOIETIC_PROGENITOR_CELL_DIFFERENTIATION	15	-0.621857	-1.62573	0.0304896	0.928492	0.927575	435	tags=40%, list=25%, signal=30%	O00203/P12644/P35968/Q16394/P12821/Q96P63
M42660	GOBP_TISSUE_DEVELOPMENT	290	0.338833	1.27875	0.0310766	0.928492	0.927575	277	tags=20%, list=16%, signal=21%	P13646/P15924/Q5D862/P13647/P02538/P08779/P02533/P13645/Q86YZ3/P20930/P01040/Q96AQ6/P35527/P35908/P31151/P10644/P16152/P01344/Q99715/Q9NZT1/Q9H8L6/Q04695/P05121/Q96CG8/O43175/P21291/P05997/P04259/Q5U651/Q13443/P05452/Q13510/P23229/P16615/P40189/P21741/O75051/P61812/P09758/P04004/Q13509/Q9UGM3/Q13547/P55809/P08123/P31431/Q15643/P15121/P58546/P27361/P61586/P10253/P11047/P31944/P07942/P49746/Q9H0U4/…
M27498	REACTOME_REGULATION_OF_TP53_ACTIVITY	20	-0.551132	-1.569	0.0316701	0.928492	0.927575	162	tags=40%, list=9%, signal=37%	Q16576/Q09028/P27694/P67870/P29590/Q96S44/Q93009/P67775
M7933	SESTO_RESPONSE_TO_UV_C1	29	-0.500857	-1.56615	0.0320268	0.928492	0.927575	177	tags=21%, list=10%, signal=19%	P07900/P67870/P45880/P43490/Q92499/P67775
M17844	KEGG_OTHER_GLYCAN_DEGRADATION	12	-0.659062	-1.67345	0.0321339	0.928492	0.927575	491	tags=75%, list=28%, signal=54%	P04062/P20933/Q99519/Q9Y2E5/P07686/Q9NTJ4/Q9BTY2/P04066/P06865
M19391	LIU_PROSTATE_CANCER_DN	90	0.417068	1.40425	0.0323415	0.928492	0.927575	391	tags=31%, list=23%, signal=25%	P13646/P13647/P02533/Q9HB40/P01344/Q02952/Q04695/P21291/P36955/Q05682/P61812/P68366/P08123/P35555/Q16363/P15121/Q9NZV1/Q16853/P07942/P78423/P23634/P09382/Q6NZI2/P13591/Q9HB63/P00749/O95967/O95084
M15543	GOBP_MEMBRANE_LIPID_METABOLIC_PROCESS	20	-0.548311	-1.56097	0.0324473	0.928492	0.927575	176	tags=25%, list=10%, signal=23%	P50897/P04066/P06865/O43286/P67775
M14507	CHARAFE_BREAST_CANCER_LUMINAL_VS_BASAL_DN	118	0.400782	1.38504	0.032758	0.928492	0.927575	264	tags=22%, list=15%, signal=20%	P13647/P02538/P08779/P02533/Q9HB40/Q9H4L5/P16152/P04156/Q04695/P04259/Q14019/Q969T4/P23229/Q9UNZ2/Q05682/P53985/Q16513/P68366/Q16666/P05156/Q08431/Q16270/P15121/Q9NPH3/P61586/P11047
M11513	SARRIO_EPITHELIAL_MESENCHYMAL_TRANSITION_DN	31	0.539445	1.53859	0.0329921	0.928492	0.927575	51	tags=19%, list=3%, signal=19%	P13646/P15924/P08779/P02533/Q7KZF4/Q9HB40
M16335	MELLMAN_TUT1_TARGETS_DN	13	-0.644169	-1.64991	0.0330654	0.928492	0.927575	222	tags=46%, list=13%, signal=41%	P15559/P48735/Q06830/P05091/P37837/Q9Y2Q3
M40057	WP_16P112_PROXIMAL_DELETION_SYNDROME	22	-0.555495	-1.61927	0.033311	0.928492	0.927575	96	tags=23%, list=6%, signal=22%	P04075/P12004/Q9UKK3/Q14764/P67775
M18387	KORKOLA_SEMINOMA_UP	11	-0.667144	-1.64775	0.0333792	0.928492	0.927575	211	tags=55%, list=12%, signal=48%	P07195/Q8IUD2/P46063/O75954/O75581/P21926
M12971	KYNG_DNA_DAMAGE_BY_GAMMA_RADIATION	14	-0.634098	-1.64529	0.0333879	0.928492	0.927575	330	tags=57%, list=19%, signal=47%	P31937/P20340/P61019/O43747/O60462/P62745/P07737/P67775
M19745	TARTE_PLASMA_CELL_VS_PLASMABLAST_DN	125	-0.320076	-1.31916	0.0334008	0.928492	0.927575	465	tags=35%, list=27%, signal=28%	Q13564/P48059/Q02880/P55060/P50991/Q13867/P07195/P35611/Q14683/O14907/P49327/P62873/Q14137/P12004/P54578/Q13610/P08133/P11387/P21796/P27694/Q9UL46/P36551/P41250/O00151/P46063/O00410/P48735/Q13185/P45973/P17812/Q04917/P15531/P14324/P34932/P61758/Q14764/P02786/P29401/P61221/P06744/P60903/P54709/Q92905/P28482
M12527	RICKMAN_TUMOR_DIFFERENTIATED_WELL_VS_POORLY_DN	72	0.443692	1.4481	0.0338753	0.928492	0.927575	146	tags=19%, list=8%, signal=19%	P15924/P13647/P02538/P08779/P02533/Q92572/Q9H299/Q09666/P30519/Q08554/Q04695/P04259/Q8N357/Q9UGI8
M12369	RICKMAN_METASTASIS_DN	51	0.481236	1.50034	0.0342747	0.928492	0.927575	82	tags=14%, list=5%, signal=13%	P13647/P02538/P19367/P30049/Q9H299/P50570/Q04695
M1877	REACTOME_GOLGI_ASSOCIATED_VESICLE_BIOGENESIS	27	0.562649	1.56322	0.0342935	0.928492	0.927575	73	tags=19%, list=4%, signal=18%	Q92572/P02794/P49407/P02792/P50570
M699	KEGG_FATTY_ACID_METABOLISM	11	-0.664599	-1.64147	0.0347486	0.928492	0.927575	578	tags=91%, list=33%, signal=61%	P49748/P30837/P49189/P42765/P55084/P24752/P05091/P30084/Q16836/P40939
M16189	BERENJENO_TRANSFORMED_BY_RHOA_UP	150	-0.305502	-1.28143	0.0349348	0.928492	0.927575	350	tags=31%, list=20%, signal=27%	Q9Y2X3/P53611/Q14137/P62328/O15212/P00390/P12004/P54578/P12814/P48509/P54687/Q04446/O75367/Q01995/P27694/O43684/O00151/O14980/Q14694/P04908/O95373/P12429/O00410/Q9UNN8/P07900/P45973/P17812/P33240/O43707/P00338/P15531/P34932/Q15185/Q9Y333/P02786/Q08J23/P37837/P61221/P27658/Q9NPY3/Q16881/P30419/Q9BXJ9/P62316/O75531/P54709
M6175	CAIRO_LIVER_DEVELOPMENT_DN	55	0.462079	1.44722	0.0351124	0.928492	0.927575	327	tags=35%, list=19%, signal=29%	P61626/Q04756/P19827/P01009/P02675/P00742/P02748/P36955/P02679/Q16513/P04004/P00734/Q93088/P19823/P03952/Q14624/P36871/P06702/P02788
M10961	GOZGIT_ESR1_TARGETS_DN	81	0.445141	1.4755	0.0352934	0.928492	0.927575	171	tags=19%, list=10%, signal=18%	P13646/P02794/P01040/P19367/P10644/Q9HB40/Q96DA0/P01009/Q96CG8/P23229/Q92626/P14209/P55011/P61812/P09758
M15477	GOBP_REGULATION_OF_ORGANELLE_ASSEMBLY	39	0.504188	1.49738	0.0357451	0.928492	0.927575	273	tags=31%, list=16%, signal=27%	Q9UHD8/P50570/O75396/Q9H444/Q14457/Q9UHD9/Q9Y277/P31431/Q9NPH3/P61586/P0DMV9/Q9H0U4
M17454	MASSARWEH_TAMOXIFEN_RESISTANCE_UP	74	0.439863	1.44417	0.0358826	0.928492	0.927575	213	tags=19%, list=12%, signal=17%	P13646/Q14533/P49407/Q9HB40/P16152/Q9NZT1/P05997/Q13443/P17405/P55011/P61812/P09758/P55809/P08123
M9246	ENGELMANN_CANCER_PROGENITORS_DN	10	0.698805	1.55143	0.0361994	0.928492	0.927575	77	tags=20%, list=4%, signal=19%	P13646/Q9NZT1
M23977	GOBP_PROTEIN_COMPLEX_OLIGOMERIZATION	35	0.515881	1.4981	0.0364431	0.928492	0.927575	129	tags=23%, list=7%, signal=22%	P13645/P04264/P04156/Q00266/P02748/Q15758/O00429/Q96QK1
M6822	ONDER_CDH1_TARGETS_1_DN	35	0.514723	1.49474	0.0364431	0.928492	0.927575	187	tags=20%, list=11%, signal=18%	P13646/P31151/P23246/Q08211/P40189/P53985/P50452
M16873	GOBP_MYOBLAST_FUSION	10	-0.664606	-1.60357	0.0364584	0.928492	0.927575	396	tags=40%, list=23%, signal=31%	Q9NZN4/O75955/P17655/P21926
M986	SMIRNOV_CIRCULATING_ENDOTHELIOCYTES_IN_CANCER_UP	32	-0.479761	-1.56642	0.0367006	0.928492	0.927575	314	tags=34%, list=18%, signal=29%	P08631/P51688/P54687/P53004/P07858/P04908/O43286/Q9NPY3/P09486/P51153/P21926
M14674	GOBP_REGULATION_OF_SIGNAL_TRANSDUCTION_BY_P53_CLASS_MEDIATOR	24	-0.522686	-1.55541	0.0369885	0.928492	0.927575	535	tags=58%, list=31%, signal=41%	P60866/O75832/P61978/Q14146/P53801/Q8TDI0/P46777/Q14137/P17844/Q7LG56/P29590/Q96S44/Q93009/P63241
M15304	GOBP_STEM_CELL_DIFFERENTIATION	37	-0.447758	-1.4793	0.0370291	0.928492	0.927575	307	tags=35%, list=18%, signal=30%	Q13610/Q9UBV8/P60953/O60462/P08133/Q16394/O75340/Q9NS98/P12821/P02751/Q08J23/O75581/P28482
M16570	GOBP_CELL_GROWTH	81	-0.362435	-1.40251	0.0371004	0.928492	0.927575	177	tags=17%, list=10%, signal=16%	P07900/P50897/Q9NS98/P18206/P46109/P29590/P02751/O94985/P02786/P06733/Q04637/Q13439/P05109/P67775
M19817	GOBP_IMMUNE_RESPONSE	195	0.358068	1.31223	0.0375095	0.928492	0.927575	329	tags=25%, list=19%, signal=22%	P61626/P25311/P02538/P08779/P50453/O00743/P02794/P19367/P04264/P31151/P23246/P35232/P04156/P02675/Q9UNH7/Q08211/P02787/P02748/P17405/Q14166/P40189/P21741/Q92626/P61812/P04004/Q9UGM3/P00734/Q9BY67/Q16666/P05156/P40306/Q07666/P0C0L4/P26022/P62888/Q9NPH3/P0DMV9/Q10588/P78423/Q14254/Q9BQ51/P02647/Q15942/P49770/P06702/P10321/P02788/P09382
M2246	BRUINS_UVC_RESPONSE_VIA_TP53_GROUP_D	29	0.546748	1.5294	0.0375865	0.928492	0.927575	297	tags=38%, list=17%, signal=32%	P19367/P35908/Q9H4L5/P01009/O43175/O00429/Q92626/Q06828/Q9C0C9/Q9BZP6/Q9BQ51
M105	PID_TELOMERASE_PATHWAY	17	-0.600345	-1.64566	0.0375926	0.928492	0.927575	331	tags=53%, list=19%, signal=43%	P19338/Q16576/Q09028/P07900/P62258/Q15185/O60832/O00422/P28482
M12877	GOBP_RNA_PHOSPHODIESTER_BOND_HYDROLYSIS	12	0.669889	1.54881	0.0378476	0.928492	0.927575	59	tags=25%, list=3%, signal=24%	P25311/Q7KZF4/Q10570
M15446	GOBP_FIBRINOLYSIS	11	0.717152	1.61518	0.0380523	0.928492	0.927575	269	tags=55%, list=16%, signal=46%	P04264/P02675/P05121/P02679/P00734/P03952
M1286	HOSHIDA_LIVER_CANCER_SUBCLASS_S3	68	0.444562	1.43526	0.0383562	0.928492	0.927575	301	tags=29%, list=17%, signal=25%	Q15493/P25311/P30049/P19827/P16152/P02675/P30519/P55263/P21399/P02679/P00734/P43251/Q93088/P0C0L4/Q16698/P12259/P03952/Q14624/P36871/P02647
M16763	KEGG_NEUROTROPHIN_SIGNALING_PATHWAY	23	-0.518634	-1.5202	0.0390368	0.928492	0.927575	151	tags=35%, list=9%, signal=32%	Q04917/P63000/P46109/P62258/P61981/P62834/P19174/P28482
M14811	LEE_LIVER_CANCER_ACOX1_DN	10	0.694725	1.54237	0.0393701	0.928492	0.927575	61	tags=30%, list=4%, signal=29%	Q15493/P19827/P01009
M42898	GOBP_PROTEIN_DNA_COMPLEX_ASSEMBLY	23	-0.517774	-1.51768	0.0394456	0.928492	0.927575	572	tags=57%, list=33%, signal=38%	O60264/P58876/P16402/P84243/P10412/P62805/P68431/O75367/P16403/Q15020/Q86VP6/Q01105/P16104
M1686	ZHONG_SECRETOME_OF_LUNG_CANCER_AND_ENDOTHELIUM	50	-0.401796	-1.39787	0.0401817	0.928492	0.927575	214	tags=28%, list=12%, signal=25%	P12429/P39060/Q9BQE3/Q06830/P18206/P00338/P62258/P68032/P02751/O94985/P29401/P61981/P06733/P13716
M11986	GOBP_POSITIVE_REGULATION_OF_TELOMERASE_ACTIVITY	11	-0.650083	-1.60561	0.0402531	0.928492	0.927575	177	tags=36%, list=10%, signal=33%	P07900/Q15185/O60832/P28482
M39401	WP_MECP2_AND_ASSOCIATED_RETT_SYNDROME	12	0.66769	1.54373	0.0404578	0.928492	0.927575	185	tags=42%, list=11%, signal=37%	P01344/Q08211/P21291/P31943/Q13547
M2010	MIKKELSEN_NPC_HCP_WITH_H3K4ME3_AND_H3K27ME3	12	0.667603	1.54353	0.0404578	0.928492	0.927575	206	tags=33%, list=12%, signal=30%	Q09666/P35670/P68366/O15460
M17034	REACTOME_INTEGRATION_OF_ENERGY_METABOLISM	21	-0.543383	-1.56731	0.0408596	0.928492	0.927575	77	tags=19%, list=4%, signal=18%	P29401/P37837/P62834/P67775
M10123	GOBP_SINGLE_FERTILIZATION	20	-0.535383	-1.52416	0.0410039	0.928492	0.927575	503	tags=55%, list=29%, signal=39%	P78371/P84243/O00203/P50991/P04075/P07686/P46926/P45880/P46109/Q9UK55/P21926
M1114	GOBP_REGULATION_OF_GTPASE_ACTIVITY	38	0.494156	1.4649	0.0412518	0.928492	0.927575	162	tags=24%, list=9%, signal=22%	Q15493/Q96AQ6/Q9BZ29/P36404/P05198/Q5U651/P23229/Q9P2J5/O75051
M25363	GOBP_REGULATION_OF_MACROPHAGE_MIGRATION	10	-0.656657	-1.58439	0.0413194	0.928492	0.927575	7	tags=20%, list=0%, signal=20%	P21926/P28482
M1351	SCHAEFFER_PROSTATE_DEVELOPMENT_48HR_DN	37	0.48851	1.43885	0.0413695	0.928492	0.927575	390	tags=49%, list=23%, signal=39%	P61626/P01040/Q04695/P36955/O43854/P41091/Q9NT22/P55809/P43251/O15460/P0DMV9/P23142/Q96CN7/P15144/P37173/Q9C0H2/Q9NR12/P08174
M1975	MIKKELSEN_IPS_LCP_WITH_H3K4ME3	10	0.692842	1.53819	0.0414839	0.928492	0.927575	262	tags=40%, list=15%, signal=34%	P50453/Q9H8L6/P00734/P12259
M12691	GOBP_SPHINGOLIPID_METABOLIC_PROCESS	19	-0.552012	-1.54564	0.0420031	0.928492	0.927575	67	tags=21%, list=4%, signal=20%	P50897/P06865/O43286/P67775
M87	PID_LKB1_PATHWAY	10	-0.654463	-1.5791	0.0420138	0.928492	0.927575	411	tags=70%, list=24%, signal=54%	P27348/Q16543/P07339/P07900/Q04917/P62258/P61981
M16180	GOBP_NEGATIVE_REGULATION_OF_TRANSMEMBRANE_RECEPTOR_PROTEIN_SERINE_THREONINE_KINASE_SIGNALING_PATHWAY	17	0.62045	1.52726	0.0421462	0.928492	0.927575	261	tags=35%, list=15%, signal=30%	P50570/Q9UNH7/Q9UNE7/P35555/Q9NZV1/P0DMV9
M1949	MEISSNER_NPC_HCP_WITH_H3K4ME2_AND_H3K27ME3	13	0.665654	1.56104	0.042189	0.928492	0.927575	206	tags=31%, list=12%, signal=27%	Q09666/P01344/Q9NTU7/O15460
M5955	COLLER_MYC_TARGETS_UP	15	-0.603198	-1.57695	0.0422495	0.928492	0.927575	174	tags=40%, list=10%, signal=36%	Q9HAV7/Q07021/P43490/P02786/P06744/P63241
M5740	JAEGER_METASTASIS_UP	11	-0.64713	-1.59832	0.0423173	0.928492	0.927575	111	tags=27%, list=6%, signal=26%	P02751/P06744/P09936
M10730	GOBP_NADP_METABOLIC_PROCESS	11	-0.64645	-1.59664	0.0423173	0.928492	0.927575	344	tags=55%, list=20%, signal=44%	P52209/P15559/P48735/O75874/P29401/P37837
M18532	KIM_MYCN_AMPLIFICATION_TARGETS_UP	16	-0.583587	-1.55823	0.0430117	0.936822	0.935896	139	tags=38%, list=8%, signal=35%	P54687/P15531/Q16836/P06733/Q92499/O00408
M14020	GOBP_MONOCARBOXYLIC_ACID_BIOSYNTHETIC_PROCESS	21	0.592597	1.531	0.0433387	0.936822	0.935896	66	tags=19%, list=4%, signal=19%	Q15493/Q9H4L5/P16152/P02656
M2588	SMIRNOV_RESPONSE_TO_IR_6HR_UP	18	-0.578897	-1.61371	0.0435621	0.936822	0.935896	402	tags=56%, list=23%, signal=43%	O14907/P22570/P60953/O15031/Q9UNN8/P04066/Q92696/Q92466/P35580/P09486
M2493	PEDRIOLI_MIR31_TARGETS_UP	24	0.556745	1.4949	0.04375	0.936822	0.935896	315	tags=38%, list=18%, signal=31%	Q14533/Q9NRN5/Q04695/Q9BY76/Q86SQ4/Q9BY67/Q7Z7G0/Q06203/P23634
M17520	GOBP_CHEMICAL_HOMEOSTASIS	129	0.379118	1.32485	0.0440098	0.936822	0.935896	190	tags=19%, list=11%, signal=19%	Q15493/Q5D862/P08779/Q86YZ3/P02794/P20930/P02792/Q9NUM4/P19367/P04264/P04156/P02656/P30519/P35670/P02787/Q9BY76/P36955/Q93050/P16615/P21399/P53985/P55011/P00734/O15118/P55809
M10433	GOBP_POSITIVE_REGULATION_OF_ENDOCYTOSIS	25	0.574448	1.55131	0.0440669	0.936822	0.935896	174	tags=32%, list=10%, signal=29%	Q9P2R3/P49407/P50570/P05121/P02787/P17405/P63010/P04004
M2155	MCBRYAN_PUBERTAL_BREAST_6_7WK_UP	40	0.485595	1.44593	0.0443491	0.93796	0.937034	330	tags=35%, list=19%, signal=29%	P23246/P50570/O43175/P05452/Q06481/Q93050/P40189/P61020/P02679/Q16363/P53396/Q9NZV1/P08236/Q6NZI2
M4371	MARTINEZ_TP53_TARGETS_UP	118	0.388212	1.3416	0.0453401	0.945008	0.944075	170	tags=14%, list=10%, signal=13%	Q7Z794/P61626/P08779/P50453/P02794/Q9NUM4/P01344/P50570/Q9BVC6/P02787/Q15056/P36955/P63010/P40189/P21399/P61812
M10480	GU_PDEF_TARGETS_DN	10	0.686023	1.52305	0.0456942	0.945008	0.944075	170	tags=30%, list=10%, signal=27%	P02538/P04259/P61812
M11591	GOBP_IRON_ION_TRANSPORT	11	0.668461	1.50552	0.0460177	0.945008	0.944075	91	tags=36%, list=5%, signal=35%	P02794/P02792/P50570/P02787
M12257	GOBP_REGULATION_OF_PROTEIN_SECRETION	30	0.528194	1.49521	0.0460624	0.945008	0.944075	190	tags=37%, list=11%, signal=33%	P02675/Q9NV70/Q13443/O00429/Q96QK1/O00233/P02679/P53985/P55011/P61812/P55809
M11835	KEGG_VALINE_LEUCINE_AND_ISOLEUCINE_DEGRADATION	16	-0.576302	-1.53877	0.0461116	0.945008	0.944075	552	tags=81%, list=32%, signal=56%	P09622/P30837/P49189/P42765/P31937/P54687/P55084/P24752/P05091/P05165/P30084/Q16836/P40939
M39852	WP_OSTEOBLAST_DIFFERENTIATION_AND_RELATED_DISEASES	10	-0.648164	-1.5639	0.0468748	0.945008	0.944075	34	tags=40%, list=2%, signal=39%	P12644/P42224/O75581/P28482
M817	GOBP_EPITHELIAL_TO_MESENCHYMAL_TRANSITION	31	-0.460707	-1.47578	0.0470127	0.945008	0.944075	86	tags=10%, list=5%, signal=9%	P29508/O75581/P67775
M2616	ZWANG_TRANSIENTLY_UP_BY_2ND_EGF_PULSE_ONLY	72	0.431117	1.40705	0.0474255	0.945008	0.944075	212	tags=22%, list=12%, signal=20%	P50453/Q04756/P19827/A0AVT1/O95969/Q96CG8/P02748/P05997/P24534/Q5U651/P05452/P21741/Q9NT22/P00734/O15118/Q06828
M2151	DUTERTRE_ESTRADIOL_RESPONSE_6HR_UP	36	0.490916	1.43344	0.0477569	0.945008	0.944075	198	tags=25%, list=11%, signal=23%	P13646/Q9NRN5/Q9UHD8/Q99715/Q15758/Q9Y265/P53985/P62910/P54577
M13014	ACEVEDO_LIVER_TUMOR_VS_NORMAL_ADJACENT_TISSUE_DN	42	0.491493	1.48073	0.0480933	0.945008	0.944075	95	tags=17%, list=5%, signal=16%	P25311/Q04756/P01344/P04156/O43175/P02748/P05198
M12838	GOBP_REGULATION_OF_ENDOTHELIAL_CELL_MIGRATION	49	-0.401852	-1.39567	0.0482521	0.945008	0.944075	366	tags=41%, list=21%, signal=33%	P28827/P62328/P04083/P35968/O60462/P05106/P12429/P62745/O75340/P67870/P28799/P63000/Q13630/Q6UXH8/Q02763/P06744/P09486/P42785/P19174/P27797
M15775	GOBP_NEGATIVE_REGULATION_OF_ION_TRANSPORT	13	-0.623303	-1.59647	0.0482998	0.945008	0.944075	276	tags=62%, list=16%, signal=52%	Q13557/O75915/Q8N668/P21796/P37840/P62258/P12821/O95747
M136	PID_FOXO_PATHWAY	13	-0.620584	-1.58951	0.0482998	0.945008	0.944075	252	tags=85%, list=15%, signal=73%	P31946/P63104/P04040/P11233/P27348/P11234/O14980/Q04917/P62258/Q93009/P61981
M16633	GOBP_POSITIVE_REGULATION_OF_PROTEIN_SECRETION	23	0.561243	1.49108	0.0487421	0.945008	0.944075	190	tags=39%, list=11%, signal=35%	P02675/Q9NV70/Q13443/O00429/Q96QK1/O00233/P02679/P61812/P55809
M34038	GOBP_CELL_MORPHOGENESIS	164	-0.287688	-1.2141	0.0490251	0.945008	0.944075	339	tags=30%, list=20%, signal=27%	P04083/P09493/P35968/P04075/P07686/O75955/P61026/Q9BR76/P08631/P60953/P42892/P12814/O60462/Q86UX7/Q16555/O15031/Q16394/P53990/P05106/P61160/O75400/Q15020/Q13596/P39060/P62745/Q562R1/P07900/Q9NS98/P07237/P18206/P06703/O43707/Q04917/P63000/P33151/P46109/Q07021/P02751/P35580/O15144/Q02763/O43286/Q8WVV4/P09486/P60903/P27797/P09936/Q13439/Q9HBI1
